# Supplementary material
Source: PubMed Central journal article supplement (PMC5834359)
Supplement: NIHMS908491-supplement-Supp_info.pdf [file NIHMS908491-supplement-Supp_info.pdf]

**Supplemental figure 1. Interaction network of subcore genes.** Interaction network of subcore genes, and grey edges indicating functional interaction obtained from the STRING database (version 10.0) with minimum required interaction score larger or equal to 0.95. The size of the nodes is proportional to the number of edges connected to the node. Red represents the key genes; blue represents the genes most shared among the cholangiopathies.

**Supplemental figure 2. Comparison of genes, biological processes and experimental phenotypes among core genes and genes associated with intrahepatic cholestasis (IHC) and polycystic liver disease (PLD).** (A) Venn diagram showing the degree of overlap of the 34 core genes in BA, PBC and PSC and the genes associated with IHC and PLD. (B) Top 10 enriched biological processes for genes associated with IHC and PLD. (C) Top 10 enriched mouse phenotypes for genes associated with IHC and PLD.

**Supplemental figure 3. Expression of genes following the activation of RAGE signaling in cholangiocytes.** mRNA expression levels of *TNF*, *ACTA2*, *COL1A1*, *SMAD3*, *STAT3*, and *NFKB1* in H69 cells treated with PBS control, HMGB1 or HMGB1 plus RAGE Fc protein. Expression was normalized against *GAPDH*. Values as mean  $\pm$  SD, N=3.

**Supplemental figure 1**

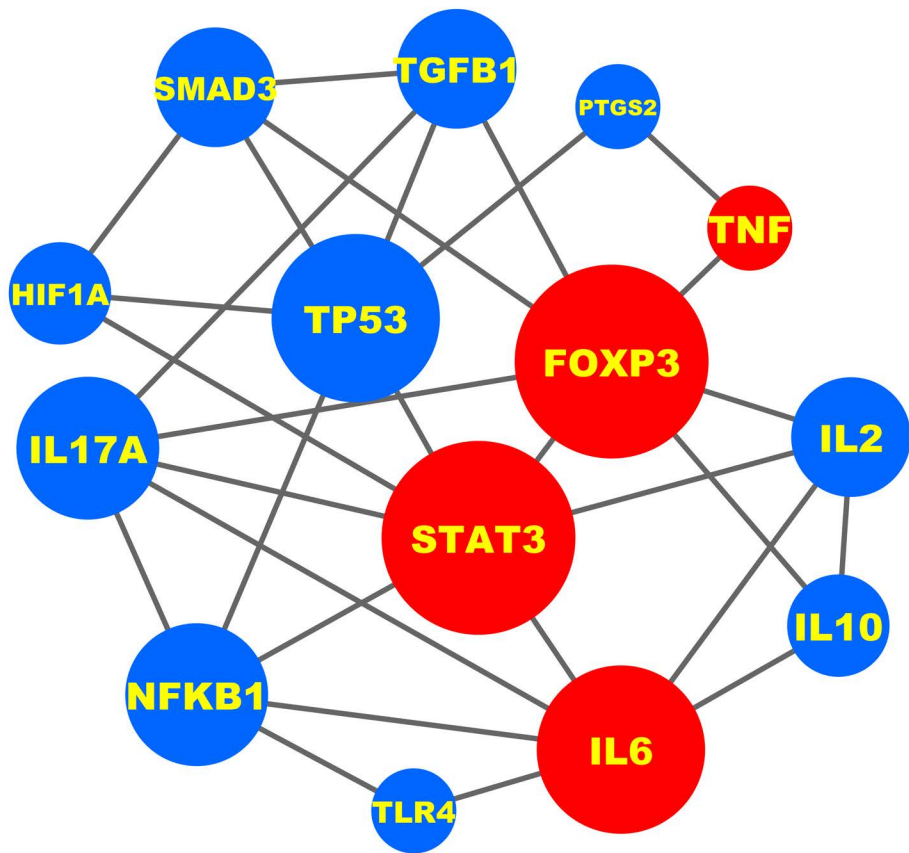

# Supplemental figure 2

A

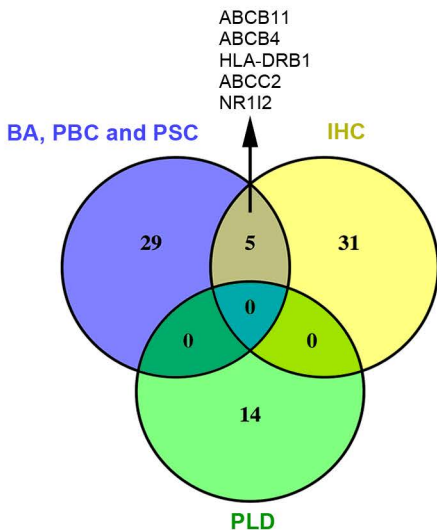

B

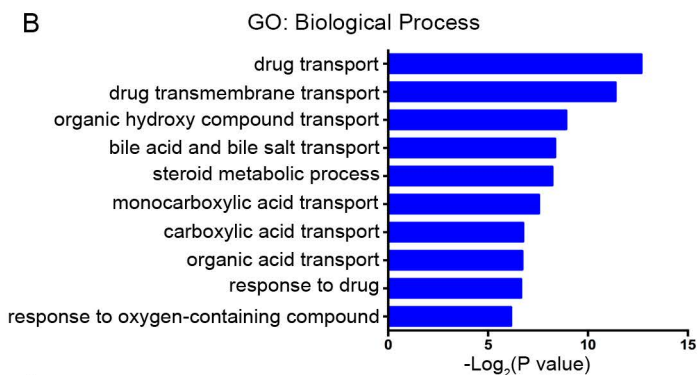

C

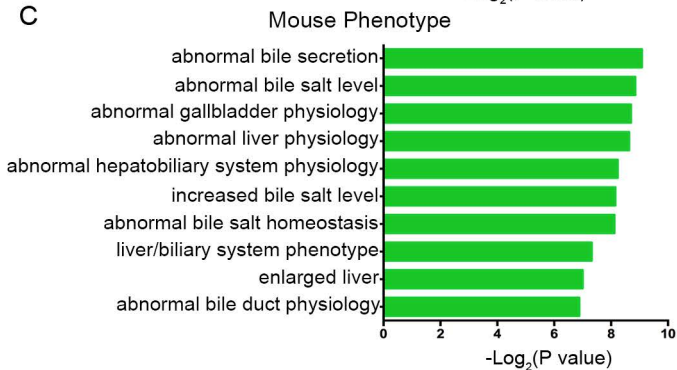

# Supplemental figure 3

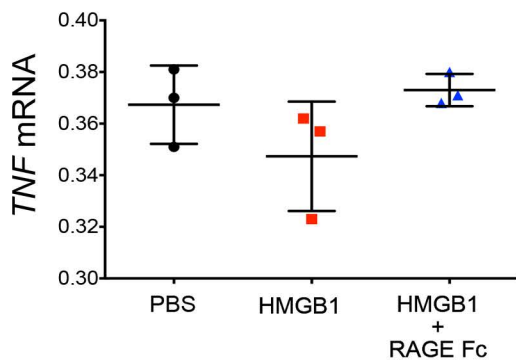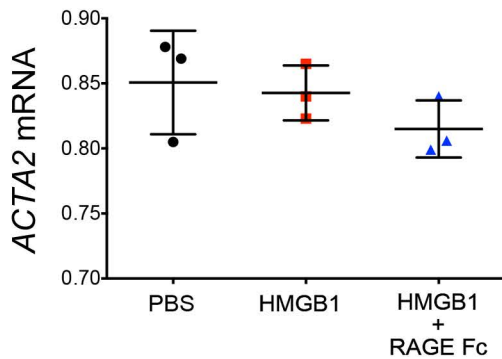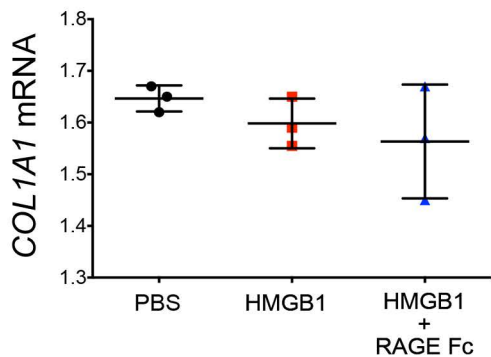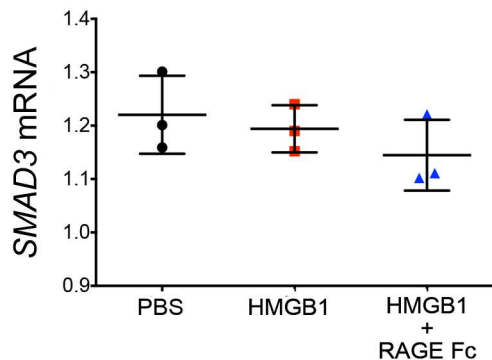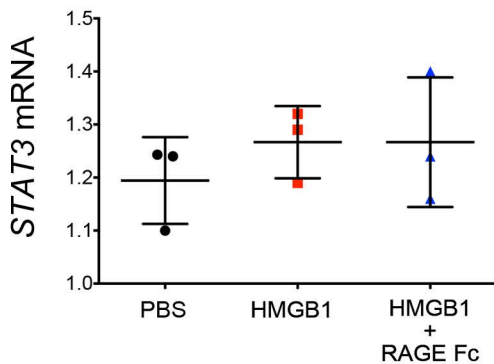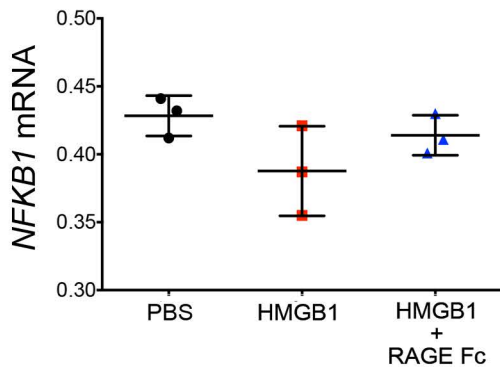

## **SUPPORTING METHODS**

**“Gene-disease associations identify a connectome with shared molecular pathways in human cholangiopathies” Luo Z, et al.**

### **Mining tools and databases**

The human interactome was downloaded from Menche et al (1). The interactome contained 13,460 proteins with 141,296 interactions. It had several sources of protein interactions, including: (i) transcription factor (TF) regulatory interactions (ii) binary interactions from yeast two-hybrid assay; (iii) literature-curated interactions; (iv) metabolic enzyme-coupled interactions; (v) kinase-substrate pairs, and (vi) signaling interactions. Hub genes were defined by the top 20% of nodes ranked by degree in the human interactome.

The essential gene list was downloaded from Dickinson et al (2), an updated list that contains 3,326 genes by combining the published data from the MGI database and 608 genes identified in the IMPC effort as causing lethality and subviability.

To compile information on experimental human TF binding, we downloaded ChEA\_2015 and ENCODE\_TF\_ChIP-seq\_2015 datasets from Enrichr, and TF binding information between 1 kb upstream and downstream of transcription initiation sites (TSSs) from ChIPbase V2.0 databases (3, 4). These datasets contain experimentally validated TF binding information collected from literatures and the ENCODE project (5). We merged the duplication information and removed mouse TF binding information from these datasets. Experimentally

verified human miRNA target information was compiled from miRecords (version 4, April 27, 2013), miRTarBase (Release 6.1) and miRWalk 2.0 databases (6-8). We constructed a TF-miRNA-subcore gene co-regulatory network by combining experimental human TF binding information, experimental miRNAs target information and subcore genes lists. The lists of TFs and miRNAs that target subcore genes and co-regulatory network are summarized in Supplemental Table 3, 4 and 5. We identified TF feed forward loops, miRNA feed forward loops and TF-miRNA composite feed forward loops using in-house Python scripts which is available in <https://github.com/Zhenhualuo/TFs-miRNAs-Feed-Forward-Loop>. In TF-FFL, TF is the master regulator that regulates miRNA and their shared target, while in miRNA-FFL, miRNA is the master regulator. TF-FFL and miRNA-FFL can be concatenated into TF-miRNA composite FFL, in which TF and miRNA regulate each other. All the TF-FFL, miRNA-FFL and TF-miRNA composite FFLs are summarized in Supplemental Table 6.

High confidence protein interaction information of subcore genes was collected from STRING database (version: 10.0) (9). To collect high confidence information, we set the minimum required interaction score to high confidence (0.950).

## Statistics tests

We performed 1,000 random permutation and calculated z-score to test the significance of disease associated gene localization and network-based disease separation S using methods from Menche et al(1). The resulting Z-score is defined:

$$Z\text{-score} = \frac{\text{Observed} - \langle \text{Randomized} \rangle}{\sigma}$$

where Observed is observed value, and  $\langle \text{Randomized} \rangle$  and  $\sigma$  are the mean and standard deviation, respectively, of values obtained across all randomized permutation sets.

To test whether disease associated proteins have a tendency to agglomerate in neighborhoods in human interactome, we compared the observed LCC size with the size expected for randomly distributed nodes of a set of the same size obtained from 1,000 simulations by computing the z-score.

To quantify the network-based separation S of two cholangiopathies A and B, we compared the mean shortest distances  $d_{AA}$  and  $d_{BB}$  within the respective diseases with the mean shortest distance  $d_{AB}$  between their proteins:

$$S = d_{AB} - \frac{d_{AA} - d_{BB}}{2}$$

To test the significance of network separation of disease pairs, we compared the observed network-based separation S with the size expected for randomly distributed nodes of a set of the same size obtained from 10,000 simulations by

computing the Z-score. The LCC size, network-based disease separation S and Z-score were calculated using methods and Python scripts from Menche et al (1). We performed random permutation analysis to evaluate if the feed forward loops (FFLs) we observed were significantly enriched against cholangiopathies associated gene background using in-house Python scripts (<https://github.com/Zhenhualuo/TFs-miRNAs-Feed-Forward-Loop>). We fixed TFs and miRNAs, and randomly selected cholangiopathies associated genes with the same number of subcore genes. Then, we calculated number of FFLs in the permutation network. We repeated random permutation 1,000 times. To test the significance, we compared the number of observed FFLs with the number of random permuted FFLs by computing Z-score.



## Reference

1. Menche J, Sharma A, Kitsak M, Ghiassian SD, Vidal M, Loscalzo J, Barabasi AL. Disease networks. Uncovering disease-disease relationships through the incomplete interactome. *Science* 2015;347:1257601.
2. Alon U. Network motifs: theory and experimental approaches. *Nat Rev Genet* 2007;8:450-461.
3. Kuleshov MV, Jones MR, Rouillard AD, Fernandez NF, Duan Q, Wang Z, Koplev S, et al. Enrichr: a comprehensive gene set enrichment analysis web server 2016 update. *Nucleic Acids Res* 2016;44:W90-97.
4. Zhou KR, Liu S, Sun WJ, Zheng LL, Zhou H, Yang JH, Qu LH. ChIPBase v2.0: decoding transcriptional regulatory networks of non-coding RNAs and protein-coding genes from ChIP-seq data. *Nucleic Acids Res* 2017;45:D43-D50.
5. An integrated encyclopedia of DNA elements in the human genome. *Nature* 2012;489:57-74.
6. Xiao F, Zuo Z, Cai G, Kang S, Gao X, Li T. miRecords: an integrated resource for microRNA-target interactions. *Nucleic Acids Res* 2009;37:D105-110.
7. **Chou CH, Chang NW, Shrestha S**, Hsu SD, Lin YL, Lee WH, Yang CD, et al. miRTarBase 2016: updates to the experimentally validated miRNA-target interactions database. *Nucleic Acids Res* 2016;44:D239-247.
8. Dweep H, Gretz N. miRWalk2.0: a comprehensive atlas of microRNA-target interactions. *Nat Methods* 2015;12:697.

9. Szklarczyk D, Franceschini A, Wyder S, Forslund K, Heller D, Huerta-Cepas J, Simonovic M, et al. STRING v10: protein-protein interaction networks, integrated over the tree of life. *Nucleic Acids Res* 2015;43:D447-452.

Author names in bold designate shared co-first authorship.

**Supplemental Table 1: The cholangiopathies gene associations.** This table shows the cholangiopathies (Biliary Atresia, Primary Biliary Cholangitis and Primary Sclerosing Cholangitis) gene associations information.

| <b>Disease</b>  | <b>Entrez ID</b> | <b>Gene Symbol</b> | <b>Association Evident</b>                                     | <b>PubMed ID</b> |
|-----------------|------------------|--------------------|----------------------------------------------------------------|------------------|
| Biliary Atresia | 728294           | D2HGDH             | Genetic association                                            | 20358598         |
| Biliary Atresia | 653437           | AQP12B             | Genetic association                                            | 20358598         |
| Biliary Atresia | 375318           | AQP12A             | Genetic association                                            | 20358598         |
| Biliary Atresia | 285193           | DUSP28             | Genetic association                                            | 20358598         |
| Biliary Atresia | 285093           | RTP5               | Genetic association                                            | 20358598         |
| Biliary Atresia | 222546           | RFX6               | Mutation                                                       | 26761945         |
| Biliary Atresia | 206338           | LVRN               | Genetic association                                            | 26379158         |
| Biliary Atresia | 150684           | COMMD1             | Genetic association                                            | 20358598         |
| Biliary Atresia | 149233           | IL23R              | Experimental model study                                       | 26404950         |
| Biliary Atresia | 144165           | PRICKLE1           | Mutation, Experimental model study                             | 26883626         |
| Biliary Atresia | 112744           | IL17F              | Experimental model study                                       | 26404950         |
| Biliary Atresia | 90865            | IL33               | Abnormal expression pattern or level, Experimental model study | 24892809         |
| Biliary Atresia | 89782            | LMLN               | Mutation                                                       | 11935322         |
| Biliary Atresia | 84289            | ING5               | Genetic association                                            | 20358598         |
| Biliary Atresia | 84216            | TMEM117            | Genetic association                                            | 20460270         |
| Biliary Atresia | 84141            | EVA1A              | Genetic association                                            | 20358598         |
| Biliary Atresia | 80781            | COL18A1            | Genetic association                                            | 26379158         |
| Biliary Atresia | 80329            | ULBP1              | Experimental model study                                       | 19662681         |
| Biliary Atresia | 80328            | ULBP2              | Experimental model study                                       | 19662681         |
| Biliary Atresia | 79919            | C2orf54            | Genetic association                                            | 20358598         |
| Biliary Atresia | 79875            | THSD4              | Genetic association                                            | 26379158         |

|                 |       |          |                                                                           |          |
|-----------------|-------|----------|---------------------------------------------------------------------------|----------|
| Biliary Atresia | 79465 | ULBP3    | Experimental model study                                                  | 19662681 |
| Biliary Atresia | 64788 | LMF1     | Genetic association                                                       | 20460270 |
| Biliary Atresia | 64321 | SOX17    | Experimental model study                                                  | 27081925 |
| Biliary Atresia | 57817 | HAMP     | Genetic association, Abnormal expression pattern or level                 | 18970934 |
| Biliary Atresia | 57658 | CALCOCO1 | Genetic association                                                       | 20460270 |
| Biliary Atresia | 57623 | ZFAT     | Genetic association                                                       | 26379158 |
| Biliary Atresia | 57140 | RNPEPL1  | Genetic association                                                       | 20358598 |
| Biliary Atresia | 56955 | MEPE     | Genetic association                                                       | 20460270 |
| Biliary Atresia | 56253 | CRTAM    | Experimental model study                                                  | 19662681 |
| Biliary Atresia | 55997 | CFC1     | Mutation                                                                  | 18162845 |
| Biliary Atresia | 54039 | PCBP3    | Genetic association                                                       | 20460270 |
| Biliary Atresia | 51348 | KLRF1    | Experimental model study                                                  | 19662681 |
| Biliary Atresia | 51311 | TLR8     | Abnormal expression pattern or level                                      | 21832949 |
| Biliary Atresia | 51284 | TLR7     | Abnormal expression pattern or level                                      | 17075576 |
| Biliary Atresia | 51281 | ANKMY1   | Genetic association                                                       | 20358598 |
| Biliary Atresia | 51078 | THAP4    | Genetic association                                                       | 20358598 |
| Biliary Atresia | 50964 | SOST     | Abnormal expression pattern or level, Associated with clinical parameters | 25659290 |
| Biliary Atresia | 50943 | FOXP3    | Abnormal expression pattern or level, Experimental model study            | 20347178 |
| Biliary Atresia | 27130 | INVS     | Mutation                                                                  | 11935322 |
| Biliary Atresia | 26525 | IL36RN   | Experimental model study                                                  | 16328331 |
| Biliary Atresia | 26291 | FGF21    | Abnormal expression pattern or level                                      | 27003131 |
| Biliary Atresia | 26135 | SERBP1   | Experimental model study                                                  | 20097372 |
| Biliary Atresia | 25992 | SNED1    | Genetic association                                                       | 20358598 |
| Biliary Atresia | 25805 | BAMBI    | Experimental model study                                                  | 19116990 |
| Biliary Atresia | 23192 | ATG4B    | Genetic association                                                       | 20358598 |
| Biliary Atresia | 23178 | PASK     | Genetic association                                                       | 20358598 |
| Biliary Atresia | 22914 | KLRK1    | Experimental model study                                                  | 19662681 |

|                 |       |         |                                                                                                     |          |
|-----------------|-------|---------|-----------------------------------------------------------------------------------------------------|----------|
| Biliary Atresia | 11132 | CAPN10  | Genetic association                                                                                 | 20358598 |
| Biliary Atresia | 10653 | SPINT2  | Abnormal expression pattern or level, Associated with clinical parameters, Biomarker                | 21898507 |
| Biliary Atresia | 10631 | POSTN   | Abnormal expression pattern or level, Associated with clinical parameters                           | 25980529 |
| Biliary Atresia | 10563 | CXCL13  | Abnormal expression pattern or level, Experimental model study                                      | 26059850 |
| Biliary Atresia | 10494 | STK25   | Genetic association                                                                                 | 20358598 |
| Biliary Atresia | 10413 | YAP1    | Abnormal expression pattern or level, Biomarker                                                     | 24746211 |
| Biliary Atresia | 10379 | IRF9    | Abnormal expression pattern or level                                                                | 16083724 |
| Biliary Atresia | 9971  | NR1H4   | Experimental model study                                                                            | 19581828 |
| Biliary Atresia | 9970  | NR1I3   | Abnormal expression pattern or level                                                                | 18327154 |
| Biliary Atresia | 9855  | FARP2   | Genetic association                                                                                 | 20358598 |
| Biliary Atresia | 9839  | ZEB2    | Experimental model study                                                                            | 21336163 |
| Biliary Atresia | 9759  | HDAC4   | Abnormal expression pattern or level, Experimental model study                                      | 26109312 |
| Biliary Atresia | 9370  | ADIPOQ  | Genetic association                                                                                 | 26884098 |
| Biliary Atresia | 9235  | IL32    | Abnormal expression pattern or level, Experimental model study                                      | 23607494 |
| Biliary Atresia | 8930  | MBD4    | Abnormal DNA methylation                                                                            | 21857377 |
| Biliary Atresia | 8862  | APLN    | Abnormal expression pattern or level, Biomarker                                                     | 23160902 |
| Biliary Atresia | 8857  | FCGBP   | Abnormal expression pattern or level                                                                | 22761039 |
| Biliary Atresia | 8856  | NR1I2   | Experimental model study                                                                            | 19581828 |
| Biliary Atresia | 8842  | PROM1   | Abnormal expression pattern or level, Associated with clinical parameters, Experimental model study | 24798639 |
| Biliary Atresia | 8788  | DLK1    | Abnormal expression pattern or level                                                                | 14743499 |
| Biliary Atresia | 8743  | TNFSF10 | Abnormal expression pattern or level, Experimental model study                                      | 17661372 |
| Biliary Atresia | 8647  | ABCB11  | Experimental model study                                                                            | 19581828 |
| Biliary Atresia | 8549  | LGR5    | Abnormal expression pattern or level, Biomarker                                                     | 27019151 |
| Biliary Atresia | 8431  | NR0B2   | Abnormal expression pattern or level                                                                | 16628629 |
| Biliary Atresia | 8302  | KLRC4   | Experimental model study                                                                            | 19662681 |
| Biliary Atresia | 7547  | ZIC3    | Mutation                                                                                            | 14681828 |

|                 |      |         |                                                                                                     |          |
|-----------------|------|---------|-----------------------------------------------------------------------------------------------------|----------|
| Biliary Atresia | 7511 | XPNPEP1 | Genetic association                                                                                 | 22118303 |
| Biliary Atresia | 7431 | VIM     | Abnormal expression pattern or level                                                                | 27059791 |
| Biliary Atresia | 7429 | VIL1    | Abnormal expression pattern or level, Associated with clinical parameters                           | 14550699 |
| Biliary Atresia | 7422 | VEGFA   | Abnormal expression pattern or level                                                                | 26510548 |
| Biliary Atresia | 7392 | USF2    | Genetic association, Abnormal expression pattern or level                                           | 18970934 |
| Biliary Atresia | 7157 | TP53    | Abnormal expression pattern or level                                                                | 20422055 |
| Biliary Atresia | 7148 | TNXB    | Abnormal expression pattern or level                                                                | 11204487 |
| Biliary Atresia | 7124 | TNF     | Abnormal expression pattern or level, Experimental model study                                      | 18393301 |
| Biliary Atresia | 7099 | TLR4    | Abnormal expression pattern or level, Experimental model study                                      | 24651485 |
| Biliary Atresia | 7098 | TLR3    | Abnormal expression pattern or level, Experimental model study                                      | 17661372 |
| Biliary Atresia | 7097 | TLR2    | Experimental model study                                                                            | 24651485 |
| Biliary Atresia | 7079 | TIMP4   | Abnormal expression pattern or level, Experimental model study                                      | 26225831 |
| Biliary Atresia | 7078 | TIMP3   | Abnormal expression pattern or level                                                                | 16226986 |
| Biliary Atresia | 7077 | TIMP2   | Abnormal expression pattern or level                                                                | 16226986 |
| Biliary Atresia | 7076 | TIMP1   | Experimental model study                                                                            | 20097372 |
| Biliary Atresia | 7066 | THPO    | Abnormal expression pattern or level, Associated with clinical parameters                           | 12149701 |
| Biliary Atresia | 7042 | TGFB2   | Abnormal expression pattern or level, Associated with clinical parameters                           | 15137003 |
| Biliary Atresia | 7040 | TGFB1   | Abnormal expression pattern or level, Associated with clinical parameters, Experimental model study | 24798639 |
| Biliary Atresia | 7010 | TEK     | Abnormal expression pattern or level, Associated with clinical parameters                           | 24126820 |
| Biliary Atresia | 6928 | HNF1B   | Mutation, Associated with clinical parameters                                                       | 25741167 |
| Biliary Atresia | 6778 | STAT6   | Experimental model study                                                                            | 22005305 |
| Biliary Atresia | 6774 | STAT3   | Abnormal expression pattern or level, Experimental model study                                      | 25450715 |
| Biliary Atresia | 6772 | STAT1   | Experimental model study                                                                            | 22005305 |
| Biliary Atresia | 6696 | SPP1    | Experimental model study                                                                            | 21742364 |
| Biliary Atresia | 6692 | SPINT1  | Abnormal expression pattern or level, Associated with clinical parameters, Biomarker                | 21898507 |
| Biliary Atresia | 6662 | SOX9    | Abnormal expression pattern or level, Associated with clinical parameters                           | 24658905 |

|                 |      |         |                                                                                      |          |
|-----------------|------|---------|--------------------------------------------------------------------------------------|----------|
| Biliary Atresia | 6615 | SNAI1   | Abnormal expression pattern or level                                                 | 27059791 |
| Biliary Atresia | 6555 | SLC10A2 | Abnormal expression pattern or level                                                 | 16628629 |
| Biliary Atresia | 6554 | SLC10A1 | Experimental model study                                                             | 19581828 |
| Biliary Atresia | 6469 | SHH     | Abnormal DNA methylation                                                             | 27010479 |
| Biliary Atresia | 6441 | SFTPD   | Abnormal expression pattern or level                                                 | 25638623 |
| Biliary Atresia | 6403 | SELP    | Abnormal expression pattern or level                                                 | 26102172 |
| Biliary Atresia | 6401 | SELE    | Abnormal expression pattern or level, Associated with clinical parameters            | 18704886 |
| Biliary Atresia | 6387 | CXCL12  | Abnormal expression pattern or level                                                 | 25846069 |
| Biliary Atresia | 6376 | CX3CL1  | Abnormal expression pattern or level                                                 | 23162109 |
| Biliary Atresia | 6374 | CXCL5   | Abnormal expression pattern or level, Experimental model study                       | 26059850 |
| Biliary Atresia | 6373 | CXCL11  | Abnormal expression pattern or level                                                 | 19788687 |
| Biliary Atresia | 6352 | CCL5    | Experimental model study                                                             | 16328331 |
| Biliary Atresia | 6348 | CCL3    | Abnormal expression pattern or level, Experimental model study                       | 26059850 |
| Biliary Atresia | 6347 | CCL2    | Experimental model study                                                             | 16328331 |
| Biliary Atresia | 6275 | S100A4  | Experimental model study                                                             | 19116990 |
| Biliary Atresia | 6237 | RRAS    | Associated with clinical parameters, Biomarker                                       | 21390152 |
| Biliary Atresia | 6097 | RORC    | Experimental model study                                                             | 26404950 |
| Biliary Atresia | 5950 | RBP4    | Abnormal expression pattern or level, Associated with clinical parameters, Biomarker | 21484122 |
| Biliary Atresia | 5788 | PTPRC   | Abnormal expression pattern or level, Associated with clinical parameters            | 14697969 |
| Biliary Atresia | 5743 | PTGS2   | Abnormal expression pattern or level, Associated with clinical parameters            | 20084600 |
| Biliary Atresia | 5728 | PTEN    | Abnormal expression pattern or level                                                 | 25487473 |
| Biliary Atresia | 5599 | MAPK8   | Experimental model study                                                             | 24651485 |
| Biliary Atresia | 5594 | MAPK1   | Experimental model study                                                             | 24651485 |
| Biliary Atresia | 5551 | PRF1    | Experimental model study                                                             | 24096050 |
| Biliary Atresia | 5520 | PPP2R2A | Abnormal expression pattern or level, Experimental model study                       | 25238119 |
| Biliary Atresia | 5478 | PPIA    | Abnormal expression pattern or level, Experimental model study                       | 26225831 |
| Biliary Atresia | 5412 | UBL3    | Genetic association                                                                  | 20460270 |

|                 |      |           |                                                                                                     |          |
|-----------------|------|-----------|-----------------------------------------------------------------------------------------------------|----------|
| Biliary Atresia | 5328 | PLAU      | Abnormal expression pattern or level, Experimental model study                                      | 24838399 |
| Biliary Atresia | 5245 | PHB       | Abnormal expression pattern or level, Experimental model study                                      | 26109312 |
| Biliary Atresia | 5244 | ABCB4     | Abnormal expression pattern or level                                                                | 18327154 |
| Biliary Atresia | 5168 | ENPP2     | Abnormal expression pattern or level, Associated with clinical parameters, Biomarker                | 25536867 |
| Biliary Atresia | 5154 | PDGFA     | Abnormal DNA methylation                                                                            | 27010479 |
| Biliary Atresia | 4982 | TNFRSF11B | Abnormal expression pattern or level, Associated with clinical parameters                           | 19184056 |
| Biliary Atresia | 4854 | NOTCH3    | Abnormal expression pattern or level                                                                | 15307138 |
| Biliary Atresia | 4853 | NOTCH2    | Abnormal expression pattern or level                                                                | 15307138 |
| Biliary Atresia | 4843 | NOS2      | Abnormal expression pattern or level                                                                | 18564140 |
| Biliary Atresia | 4842 | NOS1      | Abnormal expression pattern or level                                                                | 18564140 |
| Biliary Atresia | 4818 | NKG7      | Experimental model study                                                                            | 19662681 |
| Biliary Atresia | 4790 | NFKB1     | Abnormal expression pattern or level, Experimental model study                                      | 17661372 |
| Biliary Atresia | 4735 | SEPTIN2   | Genetic association                                                                                 | 20358598 |
| Biliary Atresia | 4684 | NCAM1     | Abnormal expression pattern or level                                                                | 9149340  |
| Biliary Atresia | 4600 | MX2       | Genetic association                                                                                 | 26379158 |
| Biliary Atresia | 4599 | MX1       | Abnormal expression pattern or level, Experimental model study                                      | 17661372 |
| Biliary Atresia | 4318 | MMP9      | Abnormal expression pattern or level, Experimental model study                                      | 19084240 |
| Biliary Atresia | 4316 | MMP7      | Abnormal expression pattern or level                                                                | 15696117 |
| Biliary Atresia | 4314 | MMP3      | Abnormal expression pattern or level, Associated with clinical parameters                           | 21191599 |
| Biliary Atresia | 4313 | MMP2      | Abnormal expression pattern or level                                                                | 16226986 |
| Biliary Atresia | 4312 | MMP1      | Abnormal expression pattern or level                                                                | 8608892  |
| Biliary Atresia | 4283 | CXCL9     | Abnormal expression pattern or level                                                                | 16083724 |
| Biliary Atresia | 4282 | MIF       | Genetic association                                                                                 | 16385258 |
| Biliary Atresia | 4152 | MBD1      | Abnormal DNA methylation                                                                            | 21857377 |
| Biliary Atresia | 4129 | MAOB      | Abnormal expression pattern or level, Associated with clinical parameters                           | 27257052 |
| Biliary Atresia | 4088 | SMAD3     | Abnormal expression pattern or level, Associated with clinical parameters, Experimental model study | 24798639 |



|                 |      |        |                                                                           |          |
|-----------------|------|--------|---------------------------------------------------------------------------|----------|
| Biliary Atresia | 3958 | LGALS3 | Abnormal expression pattern or level, Associated with clinical parameters | 21487991 |
| Biliary Atresia | 3952 | LEP    | Abnormal expression pattern or level, Associated with clinical parameters | 18177445 |
| Biliary Atresia | 3918 | LAMC2  | Abnormal expression pattern or level                                      | 24493287 |
| Biliary Atresia | 3912 | LAMB1  | Abnormal expression pattern or level                                      | 25565194 |
| Biliary Atresia | 3875 | KRT18  | Mutation                                                                  | 12724528 |
| Biliary Atresia | 3856 | KRT8   | Mutation                                                                  | 12724528 |
| Biliary Atresia | 3855 | KRT7   | Abnormal expression pattern or level                                      | 25406900 |
| Biliary Atresia | 3822 | KLRC2  | Experimental model study                                                  | 19662681 |
| Biliary Atresia | 3815 | KIT    | Abnormal expression pattern or level, Associated with clinical parameters | 11727048 |
| Biliary Atresia | 3791 | KDR    | Abnormal expression pattern or level                                      | 26510548 |
| Biliary Atresia | 3696 | ITGB8  | Abnormal expression pattern or level                                      | 25079481 |
| Biliary Atresia | 3689 | ITGB2  | Genetic association                                                       | 23921155 |
| Biliary Atresia | 3683 | ITGAL  | Abnormal DNA methylation                                                  | 22206678 |
| Biliary Atresia | 3675 | ITGA3  | Abnormal expression pattern or level                                      | 25565194 |
| Biliary Atresia | 3673 | ITGA2  | Experimental model study                                                  | 18436621 |
| Biliary Atresia | 3665 | IRF7   | Abnormal expression pattern or level                                      | 16083724 |
| Biliary Atresia | 3661 | IRF3   | Abnormal expression pattern or level, Experimental model study            | 17661372 |
| Biliary Atresia | 3627 | CXCL10 | Abnormal expression pattern or level                                      | 16083724 |
| Biliary Atresia | 3606 | IL18   | Abnormal expression pattern or level                                      | 10726686 |
| Biliary Atresia | 3605 | IL17A  | Experimental model study                                                  | 26404950 |
| Biliary Atresia | 3600 | IL15   | Experimental model study                                                  | 26325187 |
| Biliary Atresia | 3596 | IL13   | Experimental model study                                                  | 24892809 |
| Biliary Atresia | 3593 | IL12B  | Experimental model study                                                  | 16623951 |
| Biliary Atresia | 3586 | IL10   | Abnormal expression pattern or level                                      | 17596879 |
| Biliary Atresia | 3579 | CXCR2  | Experimental model study                                                  | 24493287 |
| Biliary Atresia | 3576 | CXCL8  | Abnormal expression pattern or level                                      | 24493287 |
| Biliary Atresia | 3570 | IL6R   | Abnormal expression pattern or level, Experimental model study            | 25450715 |

|                 |      |          |                                                                           |          |
|-----------------|------|----------|---------------------------------------------------------------------------|----------|
| Biliary Atresia | 3569 | IL6      | Experimental model study, Abnormal expression pattern or level            | 26325187 |
| Biliary Atresia | 3558 | IL2      | Abnormal expression pattern or level                                      | 26765485 |
| Biliary Atresia | 3557 | IL1RN    | Abnormal expression pattern or level                                      | 12077767 |
| Biliary Atresia | 3486 | IGFBP3   | Abnormal expression pattern or level, Associated with clinical parameters | 22631062 |
| Biliary Atresia | 3484 | IGFBP1   | Abnormal expression pattern or level                                      | 9398004  |
| Biliary Atresia | 3479 | IGF1     | Abnormal expression pattern or level, Associated with clinical parameters | 22631062 |
| Biliary Atresia | 3458 | IFNG     | Abnormal expression pattern or level, Experimental model study            | 15286798 |
| Biliary Atresia | 3456 | IFNB1    | Abnormal expression pattern or level, Experimental model study            | 17661372 |
| Biliary Atresia | 3383 | ICAM1    | Genetic association                                                       | 18401716 |
| Biliary Atresia | 3320 | HSP90AA1 | Biomarker                                                                 | 22569524 |
| Biliary Atresia | 3280 | HES1     | Abnormal expression pattern or level                                      | 16822088 |
| Biliary Atresia | 3241 | HPCAL1   | Genetic association                                                       | 20460270 |
| Biliary Atresia | 3229 | HOXC13   | Genetic association                                                       | 20460270 |
| Biliary Atresia | 3170 | FOXA2    | Mutation                                                                  | 25765999 |
| Biliary Atresia | 3146 | HMGB1    | Experimental model study                                                  | 24651485 |
| Biliary Atresia | 3126 | HLA-DRB4 | Abnormal expression pattern or level, Experimental model study            | 24838399 |
| Biliary Atresia | 3123 | HLA-DRB1 | Genetic association                                                       | 15784468 |
| Biliary Atresia | 3106 | HLA-B    | Genetic association                                                       | 15784468 |
| Biliary Atresia | 3105 | HLA-A    | Genetic association                                                       | 15784468 |
| Biliary Atresia | 3091 | HIF1A    | Abnormal expression pattern or level                                      | 26510548 |
| Biliary Atresia | 3082 | HGF      | Abnormal expression pattern or level                                      | 18639691 |
| Biliary Atresia | 3069 | HDLBP    | Genetic association                                                       | 20358598 |
| Biliary Atresia | 3067 | HDC      | Abnormal expression pattern or level, Associated with clinical parameters | 27257052 |
| Biliary Atresia | 3002 | GZMB     | Experimental model study                                                  | 24096050 |
| Biliary Atresia | 3001 | GZMA     | Experimental model study                                                  | 24096050 |
| Biliary Atresia | 2938 | GSTA1    | Abnormal expression pattern or level, Biomarker                           | 10898234 |
| Biliary Atresia | 2920 | CXCL2    | Experimental model study                                                  | 20234283 |

|                 |      |         |                                                                                      |          |
|-----------------|------|---------|--------------------------------------------------------------------------------------|----------|
| Biliary Atresia | 2908 | NR3C1   | Abnormal expression pattern or level, Associated with clinical parameters            | 16226987 |
| Biliary Atresia | 2875 | GPT     | Abnormal expression pattern or level, Associated with clinical parameters            | 12018907 |
| Biliary Atresia | 2859 | GPR35   | Genetic association                                                                  | 20358598 |
| Biliary Atresia | 2833 | CXCR3   | Abnormal expression pattern or level                                                 | 16677891 |
| Biliary Atresia | 2817 | GPC1    | Mutation                                                                             | 23336978 |
| Biliary Atresia | 2736 | GLI2    | Abnormal DNA methylation                                                             | 27010479 |
| Biliary Atresia | 2690 | GHR     | Abnormal expression pattern or level                                                 | 9398004  |
| Biliary Atresia | 2625 | GATA3   | Mutation                                                                             | 26800885 |
| Biliary Atresia | 2271 | FH      | Mutation                                                                             | 22922375 |
| Biliary Atresia | 2247 | FGF2    | Experimental model study                                                             | 19116990 |
| Biliary Atresia | 2215 | FCGR3B  | Experimental model study                                                             | 23991203 |
| Biliary Atresia | 2214 | FCGR3A  | Abnormal expression pattern or level                                                 | 23162109 |
| Biliary Atresia | 2034 | EPAS1   | Abnormal expression pattern or level                                                 | 26510548 |
| Biliary Atresia | 2023 | ENO1    | Auto-antigen                                                                         | 20659472 |
| Biliary Atresia | 2022 | ENG     | Abnormal expression pattern or level, Associated with clinical parameters, Biomarker | 20383820 |
| Biliary Atresia | 1950 | EGF     | Abnormal expression pattern or level, Associated with clinical parameters            | 19012231 |
| Biliary Atresia | 1906 | EDN1    | Abnormal expression pattern or level, Associated with clinical parameters            | 12748798 |
| Biliary Atresia | 1841 | DTYMK   | Genetic association                                                                  | 20358598 |
| Biliary Atresia | 1803 | DPP4    | Biomarker, Experimental model study                                                  | 10402060 |
| Biliary Atresia | 1800 | DPEP1   | Abnormal DNA methylation                                                             | 21857377 |
| Biliary Atresia | 1788 | DNMT3A  | Abnormal DNA methylation                                                             | 21857377 |
| Biliary Atresia | 1786 | DNMT1   | Abnormal DNA methylation                                                             | 21857377 |
| Biliary Atresia | 1741 | DLG3    | Genetic association                                                                  | 26379158 |
| Biliary Atresia | 1581 | CYP7A1  | Experimental model study                                                             | 19581828 |
| Biliary Atresia | 1576 | CYP3A4  | Abnormal expression pattern or level, Associated with clinical parameters            | 23150427 |
| Biliary Atresia | 1571 | CYP2E1  | Abnormal expression pattern or level, Associated with clinical parameters            | 23150427 |
| Biliary Atresia | 1557 | CYP2C19 | Abnormal expression pattern or level, Associated with clinical parameters            | 23150427 |

|                 |      |        |                                                                           |          |
|-----------------|------|--------|---------------------------------------------------------------------------|----------|
| Biliary Atresia | 1555 | CYP2B6 | Abnormal expression pattern or level, Associated with clinical parameters | 23150427 |
| Biliary Atresia | 1544 | CYP1A2 | Abnormal expression pattern or level, Associated with clinical parameters | 23150427 |
| Biliary Atresia | 1524 | CX3CR1 | Abnormal expression pattern or level                                      | 23162109 |
| Biliary Atresia | 1490 | CTGF   | Abnormal expression pattern or level, Associated with clinical parameters | 26909983 |
| Biliary Atresia | 1282 | COL4A1 | Abnormal expression pattern or level, Associated with clinical parameters | 9473113  |
| Biliary Atresia | 1281 | COL3A1 | Abnormal expression pattern or level, Associated with clinical parameters | 8035273  |
| Biliary Atresia | 1278 | COL1A2 | Associated with clinical parameters                                       | 26452701 |
| Biliary Atresia | 1277 | COL1A1 | Associated with clinical parameters                                       | 26452701 |
| Biliary Atresia | 1244 | ABCC2  | Experimental model study                                                  | 19581828 |
| Biliary Atresia | 1235 | CCR6   | Experimental model study                                                  | 26404950 |
| Biliary Atresia | 1234 | CCR5   | Experimental model study                                                  | 16328331 |
| Biliary Atresia | 1046 | CDX4   | Genetic association                                                       | 26379158 |
| Biliary Atresia | 999  | CDH1   | Abnormal expression pattern or level, Associated with clinical parameters | 11844064 |
| Biliary Atresia | 969  | CD69   | Experimental model study                                                  | 24651485 |
| Biliary Atresia | 968  | CD68   | Abnormal expression pattern or level                                      | 16080928 |
| Biliary Atresia | 958  | CD40   | Abnormal expression pattern or level, Associated with clinical parameters | 12778387 |
| Biliary Atresia | 947  | CD34   | Abnormal expression pattern or level, Associated with clinical parameters | 24696612 |
| Biliary Atresia | 942  | CD86   | Abnormal expression pattern or level, Associated with clinical parameters | 12778387 |
| Biliary Atresia | 941  | CD80   | Abnormal expression pattern or level, Associated with clinical parameters | 12778387 |
| Biliary Atresia | 929  | CD14   | Genetic association                                                       | 16061600 |
| Biliary Atresia | 925  | CD8A   | Experimental model study                                                  | 17631148 |
| Biliary Atresia | 920  | CD4    | Abnormal expression pattern or level, Experimental model study            | 15286798 |
| Biliary Atresia | 836  | CASP3  | Abnormal expression pattern or level, Experimental model study            | 18393301 |
| Biliary Atresia | 834  | CASP1  | Abnormal expression pattern or level, Experimental model study            | 23607494 |
| Biliary Atresia | 719  | C3AR1  | Abnormal expression pattern or level                                      | 16083724 |
| Biliary Atresia | 712  | C1QA   | Abnormal expression pattern or level                                      | 16083724 |
| Biliary Atresia | 666  | BOK    | Genetic association                                                       | 20358598 |

|                             |       |        |                                                                                      |          |
|-----------------------------|-------|--------|--------------------------------------------------------------------------------------|----------|
| Biliary Atresia             | 655   | BMP7   | Abnormal expression pattern or level, Associated with clinical parameters, Biomarker | 19387926 |
| Biliary Atresia             | 566   | AZU1   | Abnormal expression pattern or level                                                 | 20399025 |
| Biliary Atresia             | 547   | KIF1A  | Genetic association                                                                  | 20358598 |
| Biliary Atresia             | 382   | ARF6   | Genetic association                                                                  | 26379158 |
| Biliary Atresia             | 356   | FASLG  | Abnormal expression pattern or level, Associated with clinical parameters            | 11083430 |
| Biliary Atresia             | 355   | FAS    | Abnormal expression pattern or level, Associated with clinical parameters            | 11083430 |
| Biliary Atresia             | 345   | APOC3  | Biomarker                                                                            | 22569524 |
| Biliary Atresia             | 344   | APOC2  | Biomarker                                                                            | 22569524 |
| Biliary Atresia             | 285   | ANGPT2 | Abnormal expression pattern or level, Associated with clinical parameters            | 24126820 |
| Biliary Atresia             | 284   | ANGPT1 | Abnormal expression pattern or level, Associated with clinical parameters            | 24126820 |
| Biliary Atresia             | 207   | AKT1   | Abnormal expression pattern or level                                                 | 25487473 |
| Biliary Atresia             | 189   | AGXT   | Genetic association                                                                  | 20358598 |
| Biliary Atresia             | 182   | JAG1   | Mutation                                                                             | 12297837 |
| Biliary Atresia             | 120   | ADD3   | Genetic association, Abnormal expression pattern or level                            | 24104524 |
| Biliary Atresia             | 58    | ACTA1  | Abnormal expression pattern or level, Associated with clinical parameters            | 24798639 |
| Primary Biliary Cholangitis | 8647  | ABCB11 | Genetic association                                                                  | 14999697 |
| Primary Biliary Cholangitis | 5244  | ABCB4  | Mutation                                                                             | 26324191 |
| Primary Biliary Cholangitis | 1244  | ABCC2  | Abnormal expression pattern or level                                                 | 12084558 |
| Primary Biliary Cholangitis | 8714  | ABCC3  | Abnormal expression pattern or level, Experimental model study                       | 12898590 |
| Primary Biliary Cholangitis | 10257 | ABCC4  | Abnormal expression pattern or level                                                 | 17696930 |
| Primary Biliary Cholangitis | 10057 | ABCC5  | Abnormal expression pattern or level                                                 | 17627974 |
| Primary Biliary Cholangitis | 9429  | ABCG2  | Abnormal expression pattern or level                                                 | 17627974 |
| Primary Biliary Cholangitis | 26523 | AGO1   | Auto-antigen                                                                         | 22647870 |
| Primary Biliary Cholangitis | 326   | AIRE   | Auto-antigen                                                                         | 11343230 |
| Primary Biliary Cholangitis | 11215 | AKAP11 | Genetic association                                                                  | 22936693 |
| Primary Biliary Cholangitis | 207   | AKT1   | Abnormal expression pattern or level, Associated with clinical parameters            | 17164408 |
| Primary Biliary Cholangitis | 213   | ALB    | Auto-antigen                                                                         | 8460168  |

|                             |       |         |                                                                           |          |
|-----------------------------|-------|---------|---------------------------------------------------------------------------|----------|
| Primary Biliary Cholangitis | 217   | ALDH2   | Genetic association                                                       | 26394269 |
| Primary Biliary Cholangitis | 249   | ALPL    | Abnormal expression pattern or level                                      | 16567122 |
| Primary Biliary Cholangitis | 290   | ANPEP   | Abnormal expression pattern or level, Biomarker                           | 12636933 |
| Primary Biliary Cholangitis | 302   | ANXA2   | Abnormal expression pattern or level                                      | 19823170 |
| Primary Biliary Cholangitis | 8639  | AOC3    | Abnormal expression pattern or level                                      | 9686623  |
| Primary Biliary Cholangitis | 348   | APOE    | Biomarker                                                                 | 11592592 |
| Primary Biliary Cholangitis | 350   | APOH    | Auto-antigen, Associated with clinical parameters                         | 18551357 |
| Primary Biliary Cholangitis | 358   | AQP1    | Abnormal expression pattern or level, Associated with clinical parameters | 23949237 |
| Primary Biliary Cholangitis | 408   | ARRB1   | Abnormal expression pattern or level                                      | 21243522 |
| Primary Biliary Cholangitis | 472   | ATM     | Abnormal expression pattern or level                                      | 18456456 |
| Primary Biliary Cholangitis | 6311  | ATXN2   | Genetic association                                                       | 22961000 |
| Primary Biliary Cholangitis | 27087 | B3GAT1  | Abnormal expression pattern or level                                      | 21735469 |
| Primary Biliary Cholangitis | 596   | BCL2    | Abnormal expression pattern or level                                      | 26429926 |
| Primary Biliary Cholangitis | 10018 | BCL2L11 | Abnormal expression pattern or level, Experimental model study            | 23295054 |
| Primary Biliary Cholangitis | 602   | BCL3    | Abnormal expression pattern or level                                      | 24293610 |
| Primary Biliary Cholangitis | 635   | BHMT    | Abnormal expression pattern or level                                      | 24620780 |
| Primary Biliary Cholangitis | 648   | BMI1    | Abnormal expression pattern or level, Experimental model study            | 16936260 |
| Primary Biliary Cholangitis | 8315  | BRAP    | Genetic association                                                       | 22961000 |
| Primary Biliary Cholangitis | 56244 | BTNL2   | Genetic association                                                       | 20639880 |
| Primary Biliary Cholangitis | 712   | C1QA    | Abnormal expression pattern or level                                      | 22727562 |
| Primary Biliary Cholangitis | 718   | C3      | Abnormal expression pattern or level                                      | 7507546  |
| Primary Biliary Cholangitis | 720   | C4A     | Genetic association                                                       | 1936808  |
| Primary Biliary Cholangitis | 721   | C4B     | Genetic association                                                       | 3496684  |
| Primary Biliary Cholangitis | 727   | C5      | Genetic association                                                       | 23710202 |
| Primary Biliary Cholangitis | 90355 | C5orf30 | Genetic association                                                       | 26394269 |
| Primary Biliary Cholangitis | 10665 | C6orf10 | Genetic association                                                       | 20639880 |
| Primary Biliary Cholangitis | 760   | CA2     | Auto-antigen                                                              | 10433013 |

|                             |        |         |                                                                           |          |
|-----------------------------|--------|---------|---------------------------------------------------------------------------|----------|
| Primary Biliary Cholangitis | 133690 | CAPSL   | Genetic association                                                       | 22961000 |
| Primary Biliary Cholangitis | 857    | CAV1    | Abnormal expression pattern or level                                      | 15968725 |
| Primary Biliary Cholangitis | 858    | CAV2    | Abnormal expression pattern or level                                      | 15968725 |
| Primary Biliary Cholangitis | 283234 | CCDC88B | Genetic association                                                       | 26394269 |
| Primary Biliary Cholangitis | 6364   | CCL20   | Genetic association                                                       | 26394269 |
| Primary Biliary Cholangitis | 56477  | CCL28   | Abnormal expression pattern or level, Experimental model study            | 16785557 |
| Primary Biliary Cholangitis | 6354   | CCL7    | Abnormal expression pattern or level                                      | 11169522 |
| Primary Biliary Cholangitis | 6355   | CCL8    | Abnormal expression pattern or level                                      | 11169522 |
| Primary Biliary Cholangitis | 2826   | CCR10   | Abnormal expression pattern or level, Experimental model study            | 16785557 |
| Primary Biliary Cholangitis | 729230 | CCR2    | Abnormal expression pattern or level                                      | 24185682 |
| Primary Biliary Cholangitis | 1234   | CCR5    | Genetic association                                                       | 15566517 |
| Primary Biliary Cholangitis | 1236   | CCR7    | Abnormal expression pattern or level                                      | 22727562 |
| Primary Biliary Cholangitis | 9398   | CD101   | Auto-antigen, Experimental model study                                    | 21613619 |
| Primary Biliary Cholangitis | 929    | CD14    | Abnormal expression pattern or level, Associated with clinical parameters | 26403460 |
| Primary Biliary Cholangitis | 4064   | CD180   | Abnormal expression pattern or level                                      | 17448566 |
| Primary Biliary Cholangitis | 930    | CD19    | Abnormal expression pattern or level, Experimental model study            | 25627620 |
| Primary Biliary Cholangitis | 909    | CD1a    | Abnormal expression pattern or level                                      | 22498823 |
| Primary Biliary Cholangitis | 911    | CD1C    | Abnormal expression pattern or level                                      | 21092071 |
| Primary Biliary Cholangitis | 912    | CD1d    | Auto-antigen, Abnormal expression pattern or level                        | 25855031 |
| Primary Biliary Cholangitis | 939    | CD27    | Abnormal expression pattern or level                                      | 15685542 |
| Primary Biliary Cholangitis | 29126  | CD274   | Abnormal expression pattern or level, Experimental model study            | 21120594 |
| Primary Biliary Cholangitis | 940    | CD28    | Abnormal expression pattern or level                                      | 9924426  |
| Primary Biliary Cholangitis | 920    | CD4     | Abnormal expression pattern or level                                      | 20729906 |
| Primary Biliary Cholangitis | 958    | CD40    | Abnormal expression pattern or level                                      | 26388238 |
| Primary Biliary Cholangitis | 959    | CD40LG  | Abnormal DNA methylation                                                  | 21898485 |
| Primary Biliary Cholangitis | 960    | CD44    | Abnormal expression pattern or level                                      | 10674028 |
| Primary Biliary Cholangitis | 968    | CD68    | Abnormal expression pattern or level                                      | 10847481 |

|                             |        |         |                                                                |          |
|-----------------------------|--------|---------|----------------------------------------------------------------|----------|
| Primary Biliary Cholangitis | 972    | CD74    | Abnormal expression pattern or level, Biomarker                | 23913513 |
| Primary Biliary Cholangitis | 973    | CD79A   | Experimental model study                                       | 21274873 |
| Primary Biliary Cholangitis | 941    | CD80    | Genetic association                                            | 25690649 |
| Primary Biliary Cholangitis | 9308   | CD83    | Abnormal expression pattern or level                           | 22727562 |
| Primary Biliary Cholangitis | 942    | CD86    | Abnormal expression pattern or level                           | 26388238 |
| Primary Biliary Cholangitis | 925    | CD8A    | Abnormal expression pattern or level                           | 21735469 |
| Primary Biliary Cholangitis | 1026   | CDKN1A  | Abnormal expression pattern or level                           | 18456456 |
| Primary Biliary Cholangitis | 1027   | CDKN1B  | Abnormal expression pattern or level                           | 24741631 |
| Primary Biliary Cholangitis | 1029   | CDKN2A  | Abnormal expression pattern or level                           | 18456456 |
| Primary Biliary Cholangitis | 1059   | CENPB   | Auto-antigen                                                   | 22647870 |
| Primary Biliary Cholangitis | 1131   | CHRM3   | Auto-antigen, Biomarker                                        | 24750585 |
| Primary Biliary Cholangitis | 1147   | CHUK    | Abnormal expression pattern or level                           | 20940109 |
| Primary Biliary Cholangitis | 493856 | CISD2   | Genetic association                                            | 26394269 |
| Primary Biliary Cholangitis | 23562  | CLDN14  | Genetic association                                            | 26842849 |
| Primary Biliary Cholangitis | 23274  | CLEC16A | Genetic association                                            | 21399635 |
| Primary Biliary Cholangitis | 1268   | CNR1    | Abnormal expression pattern or level, Genetic association      | 19730968 |
| Primary Biliary Cholangitis | 1269   | CNR2    | Abnormal expression pattern or level, Genetic association      | 19730968 |
| Primary Biliary Cholangitis | 1302   | COL11A2 | Genetic association                                            | 20639880 |
| Primary Biliary Cholangitis | 1277   | COL1A1  | Genetic association                                            | 11230734 |
| Primary Biliary Cholangitis | 1394   | CRHR1   | Genetic association                                            | 22961000 |
| Primary Biliary Cholangitis | 1401   | CRP     | Auto-antigen                                                   | 9737658  |
| Primary Biliary Cholangitis | 1493   | CTLA4   | Genetic association                                            | 18778710 |
| Primary Biliary Cholangitis | 6376   | CX3CL1  | Abnormal expression pattern or level                           | 24185682 |
| Primary Biliary Cholangitis | 1524   | CX3CR1  | Abnormal expression pattern or level                           | 24185682 |
| Primary Biliary Cholangitis | 3627   | CXCL10  | Abnormal expression pattern or level                           | 16243485 |
| Primary Biliary Cholangitis | 6387   | CXCL12  | Abnormal expression pattern or level                           | 12746476 |
| Primary Biliary Cholangitis | 10563  | CXCL13  | Abnormal expression pattern or level, Experimental model study | 25627620 |



|                             |        |         |                                                                           |          |
|-----------------------------|--------|---------|---------------------------------------------------------------------------|----------|
| Primary Biliary Cholangitis | 58191  | CXCL16  | Abnormal expression pattern or level                                      | 19575365 |
| Primary Biliary Cholangitis | 3576   | CXCL8   | Abnormal expression pattern or level                                      | 16730427 |
| Primary Biliary Cholangitis | 4283   | CXCL9   | Abnormal expression pattern or level                                      | 23480180 |
| Primary Biliary Cholangitis | 2833   | CXCR3   | Abnormal expression pattern or level, Associated with clinical parameters | 23480180 |
| Primary Biliary Cholangitis | 643    | CXCR5   | Genetic association                                                       | 21399635 |
| Primary Biliary Cholangitis | 1571   | CYP2E1  | Genetic association                                                       | 15690482 |
| Primary Biliary Cholangitis | 1581   | CYP7A1  | Genetic association, Experimental model study                             | 23354620 |
| Primary Biliary Cholangitis | 1629   | DBT     | Auto-antigen                                                              | 11451161 |
| Primary Biliary Cholangitis | 780    | DDR1    | Abnormal expression pattern or level, Experimental model study            | 21356365 |
| Primary Biliary Cholangitis | 4921   | DDR2    | Abnormal expression pattern or level                                      | 12765478 |
| Primary Biliary Cholangitis | 1656   | DDX6    | Genetic association                                                       | 21399635 |
| Primary Biliary Cholangitis | 1672   | DEFB1   | Abnormal expression pattern or level                                      | 15382127 |
| Primary Biliary Cholangitis | 1673   | DEFB4A  | Abnormal expression pattern or level                                      | 15382127 |
| Primary Biliary Cholangitis | 163486 | DENND1B | Genetic association                                                       | 21399635 |
| Primary Biliary Cholangitis | 28955  | DEXI    | Genetic association                                                       | 26394269 |
| Primary Biliary Cholangitis | 1609   | DGKQ    | Genetic association                                                       | 26394269 |
| Primary Biliary Cholangitis | 1737   | DLAT    | Abnormal expression pattern or level, Associated with clinical parameters | 23231002 |
| Primary Biliary Cholangitis | 10301  | DLEU1   | Genetic association                                                       | 26394269 |
| Primary Biliary Cholangitis | 1743   | DLST    | Auto-antigen, Experimental model study                                    | 16849474 |
| Primary Biliary Cholangitis | 1755   | DMBT1   | Abnormal expression pattern or level                                      | 15101998 |
| Primary Biliary Cholangitis | 1803   | DPP4    | Abnormal expression pattern or level                                      | 10207821 |
| Primary Biliary Cholangitis | 9166   | EBAG9   | Auto-antigen                                                              | 12044529 |
| Primary Biliary Cholangitis | 1907   | EDN2    | Abnormal expression pattern or level                                      | 15691296 |
| Primary Biliary Cholangitis | 5610   | EIF2AK2 | Abnormal expression pattern or level                                      | 11169059 |
| Primary Biliary Cholangitis | 134505 | EIF3KP1 | Genetic association                                                       | 26394269 |
| Primary Biliary Cholangitis | 9844   | ELMO1   | Genetic association                                                       | 21399635 |
| Primary Biliary Cholangitis | 2023   | ENO1    | Auto-antigen                                                              | 9126798  |

|                             |        |          |                                                                                      |          |
|-----------------------------|--------|----------|--------------------------------------------------------------------------------------|----------|
| Primary Biliary Cholangitis | 953    | ENTPD1   | Abnormal expression pattern or level                                                 | 20638239 |
| Primary Biliary Cholangitis | 954    | ENTPD2   | Abnormal expression pattern or level, Experimental model study                       | 15651265 |
| Primary Biliary Cholangitis | 2056   | EPO      | Auto-antigen                                                                         | 15908264 |
| Primary Biliary Cholangitis | 2099   | ESR1     | Abnormal expression pattern or level, Associated with clinical parameters            | 15645536 |
| Primary Biliary Cholangitis | 2100   | ESR2     | Genetic association                                                                  | 26608979 |
| Primary Biliary Cholangitis | 2104   | ESRRG    | Abnormal expression pattern or level, Experimental model study                       | 24687322 |
| Primary Biliary Cholangitis | 91828  | EXOC3L4  | Genetic association                                                                  | 26394269 |
| Primary Biliary Cholangitis | 1E+08  | FAM183DP | Genetic association                                                                  | 26394269 |
| Primary Biliary Cholangitis | 355    | FAS      | Abnormal expression pattern or level                                                 | 26429926 |
| Primary Biliary Cholangitis | 356    | FASLG    | Abnormal expression pattern or level, Associated with clinical parameters            | 24759184 |
| Primary Biliary Cholangitis | 84961  | FBXL20   | Genetic association                                                                  | 21399635 |
| Primary Biliary Cholangitis | 2212   | FCGR2A   | Abnormal expression pattern or level                                                 | 1889700  |
| Primary Biliary Cholangitis | 2214   | FCGR3A   | Abnormal expression pattern or level                                                 | 23179144 |
| Primary Biliary Cholangitis | 2215   | FCGR3B   | Auto-antigen                                                                         | 18023559 |
| Primary Biliary Cholangitis | 115352 | FCRL3    | Genetic association                                                                  | 21299530 |
| Primary Biliary Cholangitis | 9965   | FGF19    | Abnormal expression pattern or level, Associated with clinical parameters            | 26293907 |
| Primary Biliary Cholangitis | 53834  | FGFRL1   | Genetic association                                                                  | 26394269 |
| Primary Biliary Cholangitis | 2271   | FH       | Auto-antigen                                                                         | 18355017 |
| Primary Biliary Cholangitis | 2335   | FN1      | Abnormal expression pattern or level                                                 | 10640998 |
| Primary Biliary Cholangitis | 2309   | FOXO3    | Abnormal expression pattern or level, Experimental model study                       | 23295054 |
| Primary Biliary Cholangitis | 50943  | FOXP3    | Genetic association, Abnormal expression pattern or level                            | 16126962 |
| Primary Biliary Cholangitis | 2580   | GAK      | Genetic association                                                                  | 26394269 |
| Primary Biliary Cholangitis | 2653   | GCSH     | Auto-antigen                                                                         | 10094940 |
| Primary Biliary Cholangitis | 51738  | GHRL     | Abnormal expression pattern or level                                                 | 15052530 |
| Primary Biliary Cholangitis | 54826  | GIN1     | Genetic association                                                                  | 26394269 |
| Primary Biliary Cholangitis | 2736   | GLI2     | Abnormal expression pattern or level                                                 | 17464985 |
| Primary Biliary Cholangitis | 10578  | GNLY     | Abnormal expression pattern or level, Associated with clinical parameters, Biomarker | 18584314 |

|                             |       |          |                                                                |          |
|-----------------------------|-------|----------|----------------------------------------------------------------|----------|
| Primary Biliary Cholangitis | 56850 | GRIPAP1  | Auto-antigen                                                   | 21091667 |
| Primary Biliary Cholangitis | 55876 | GSDMB    | Genetic association                                            | 22961000 |
| Primary Biliary Cholangitis | 2944  | GSTM1    | Genetic association                                            | 8491405  |
| Primary Biliary Cholangitis | 2952  | GSTT1    | Auto-antigen                                                   | 18242955 |
| Primary Biliary Cholangitis | 57817 | HAMP     | Abnormal expression pattern or level                           | 26270641 |
| Primary Biliary Cholangitis | 9759  | HDAC4    | Abnormal expression pattern or level, Experimental model study | 26109312 |
| Primary Biliary Cholangitis | 85441 | HELZ2    | Genetic association                                            | 27047549 |
| Primary Biliary Cholangitis | 3091  | HIF1A    | Abnormal expression pattern or level, Experimental model study | 22271822 |
| Primary Biliary Cholangitis | 3098  | HK1      | Auto-antigen                                                   | 22647870 |
| Primary Biliary Cholangitis | 3105  | HLA-A    | Auto-antigen                                                   | 12395322 |
| Primary Biliary Cholangitis | 3106  | HLA-B    | Genetic association                                            | 23809616 |
| Primary Biliary Cholangitis | 3115  | HLA-DPB1 | Abnormal expression pattern or level                           | 7709759  |
| Primary Biliary Cholangitis | 3117  | HLA-DQA1 | Genetic association                                            | 22961000 |
| Primary Biliary Cholangitis | 3118  | HLA-DQA2 | Genetic association                                            | 22936693 |
| Primary Biliary Cholangitis | 3119  | HLA-DQB1 | Genetic association                                            | 22961000 |
| Primary Biliary Cholangitis | 3120  | HLA-DQB2 | Genetic association                                            | 24265779 |
| Primary Biliary Cholangitis | 3122  | HLA-DRA  | Genetic association                                            | 20639880 |
| Primary Biliary Cholangitis | 3123  | HLA-DRB1 | Genetic association                                            | 22961000 |
| Primary Biliary Cholangitis | 3126  | HLA-DRB4 | Genetic association                                            | 7536796  |
| Primary Biliary Cholangitis | 3156  | HMGCR    | Drug target                                                    | 11943414 |
| Primary Biliary Cholangitis | 3308  | HSPA4    | Abnormal expression pattern or level                           | 10726964 |
| Primary Biliary Cholangitis | 3383  | ICAM1    | Abnormal expression pattern or level                           | 14606706 |
| Primary Biliary Cholangitis | 29851 | ICOS     | Genetic association                                            | 19333938 |
| Primary Biliary Cholangitis | 23308 | ICOSLG   | Genetic association                                            | 26084578 |
| Primary Biliary Cholangitis | 3620  | IDO1     | Abnormal expression pattern or level                           | 18176870 |
| Primary Biliary Cholangitis | 3425  | IDUA     | Genetic association                                            | 26394269 |
| Primary Biliary Cholangitis | 3439  | IFNA1    | Abnormal expression pattern or level                           | 21400555 |

|                             |        |         |                                                                           |          |
|-----------------------------|--------|---------|---------------------------------------------------------------------------|----------|
| Primary Biliary Cholangitis | 3458   | IFNG    | Abnormal expression pattern or level                                      | 24375552 |
| Primary Biliary Cholangitis | 57560  | IFT80   | Genetic association                                                       | 22936693 |
| Primary Biliary Cholangitis | 3479   | IGF1    | Abnormal expression pattern or level, Associated with clinical parameters | 17164408 |
| Primary Biliary Cholangitis | 3480   | IGF1R   | Abnormal expression pattern or level, Associated with clinical parameters | 17164408 |
| Primary Biliary Cholangitis | 3549   | IHH     | Abnormal expression pattern or level                                      | 17464985 |
| Primary Biliary Cholangitis | 22806  | IKZF3   | Genetic association                                                       | 20639879 |
| Primary Biliary Cholangitis | 3586   | IL10    | Abnormal expression pattern or level                                      | 8811053  |
| Primary Biliary Cholangitis | 3592   | IL12A   | Genetic association                                                       | 19458352 |
| Primary Biliary Cholangitis | 7048   | IL12A   | Experimental model study                                                  | 22576253 |
| Primary Biliary Cholangitis | 3593   | IL12B   | Genetic association                                                       | 26394269 |
| Primary Biliary Cholangitis | 3595   | IL12RB2 | Genetic association                                                       | 19458352 |
| Primary Biliary Cholangitis | 3605   | IL17A   | Abnormal expression pattern or level, Associated with clinical parameters | 23910013 |
| Primary Biliary Cholangitis | 3606   | IL18    | Abnormal expression pattern or level, Associated with clinical parameters | 11091279 |
| Primary Biliary Cholangitis | 8809   | IL18R1  | Genetic association                                                       | 26394269 |
| Primary Biliary Cholangitis | 8807   | IL18RAP | Genetic association                                                       | 26394269 |
| Primary Biliary Cholangitis | 3553   | IL1B    | Genetic association                                                       | 11171832 |
| Primary Biliary Cholangitis | 3554   | IL1R1   | Genetic association                                                       | 26394269 |
| Primary Biliary Cholangitis | 9173   | IL1RL1  | Genetic association                                                       | 26394269 |
| Primary Biliary Cholangitis | 8808   | IL1RL2  | Genetic association                                                       | 26394269 |
| Primary Biliary Cholangitis | 3557   | IL1RN   | Genetic association                                                       | 15884119 |
| Primary Biliary Cholangitis | 3558   | IL2     | Abnormal expression pattern or level                                      | 8565296  |
| Primary Biliary Cholangitis | 59067  | IL21    | Abnormal expression pattern or level, Experimental model study            | 25627620 |
| Primary Biliary Cholangitis | 51561  | IL23A   | Abnormal expression pattern or level                                      | 24375552 |
| Primary Biliary Cholangitis | 149233 | IL23R   | Abnormal expression pattern or level                                      | 24375552 |
| Primary Biliary Cholangitis | 3559   | IL2RA   | Abnormal expression pattern or level                                      | 20729906 |
| Primary Biliary Cholangitis | 90865  | IL33    | Abnormal expression pattern or level, Experimental model study            | 25400121 |
| Primary Biliary Cholangitis | 3565   | IL4     | Abnormal expression pattern or level, Associated with clinical parameters | 10606324 |

|                             |        |              |                                                                                      |          |
|-----------------------------|--------|--------------|--------------------------------------------------------------------------------------|----------|
| Primary Biliary Cholangitis | 3567   | IL5          | Abnormal expression pattern or level, Associated with clinical parameters            | 10634216 |
| Primary Biliary Cholangitis | 3569   | IL6          | Experimental model study, Abnormal expression pattern or level                       | 20578264 |
| Primary Biliary Cholangitis | 3570   | IL6R         | Abnormal expression pattern or level, Associated with clinical parameters            | 9524291  |
| Primary Biliary Cholangitis | 3575   | IL7R         | Genetic association                                                                  | 21399635 |
| Primary Biliary Cholangitis | 3663   | IRF5         | Genetic association                                                                  | 20639879 |
| Primary Biliary Cholangitis | 3394   | IRF8         | Genetic association                                                                  | 21399635 |
| Primary Biliary Cholangitis | 3676   | ITGA4        | Abnormal expression pattern or level                                                 | 10640998 |
| Primary Biliary Cholangitis | 3678   | ITGA5        | Genetic association                                                                  | 21116829 |
| Primary Biliary Cholangitis | 3687   | ITGAX        | Abnormal expression pattern or level                                                 | 26388238 |
| Primary Biliary Cholangitis | 3689   | ITGB2        | Abnormal expression pattern or level                                                 | 14606706 |
| Primary Biliary Cholangitis | 182    | JAG1         | Abnormal expression pattern or level                                                 | 12000721 |
| Primary Biliary Cholangitis | 284058 | KANSL1       | Genetic association                                                                  | 22961000 |
| Primary Biliary Cholangitis | 59349  | KLHL12       | Auto-antigen                                                                         | 22647870 |
| Primary Biliary Cholangitis | 55975  | KLHL7        | Auto-antigen                                                                         | 22647870 |
| Primary Biliary Cholangitis | 3875   | KRT18        | Abnormal expression pattern or level, Genetic association                            | 19585610 |
| Primary Biliary Cholangitis | 3880   | KRT19        | Abnormal expression pattern or level                                                 | 22911653 |
| Primary Biliary Cholangitis | 25984  | KRT23        | Abnormal expression pattern or level, Associated with clinical parameters, Biomarker | 27151178 |
| Primary Biliary Cholangitis | 3855   | KRT7         | Abnormal expression pattern or level                                                 | 21681009 |
| Primary Biliary Cholangitis | 3856   | KRT8         | Abnormal expression pattern or level, Genetic association                            | 19585610 |
| Primary Biliary Cholangitis | 3916   | LAMP1        | Abnormal expression pattern or level, Experimental model study                       | 22098537 |
| Primary Biliary Cholangitis | 3920   | LAMP2        | Biomarker                                                                            | 24007661 |
| Primary Biliary Cholangitis | 81606  | LBH          | Genetic association                                                                  | 26394269 |
| Primary Biliary Cholangitis | 3930   | LBR          | Auto-antigen                                                                         | 22647870 |
| Primary Biliary Cholangitis | 3952   | LEP          | Abnormal expression pattern or level                                                 | 15052530 |
| Primary Biliary Cholangitis | 3959   | LGALS3BP     | Abnormal expression pattern or level, Associated with clinical parameters, Biomarker | 26418076 |
| Primary Biliary Cholangitis | 1E+08  | LOC100533842 | Genetic association                                                                  | 26394269 |
| Primary Biliary Cholangitis | 1E+08  | LOC102723649 | Genetic association                                                                  | 26394269 |

|                             |        |           |                                                                           |          |
|-----------------------------|--------|-----------|---------------------------------------------------------------------------|----------|
| Primary Biliary Cholangitis | 285626 | LOC285626 | Genetic association                                                       | 26394269 |
| Primary Biliary Cholangitis | 442263 | LOC442263 | Genetic association                                                       | 26394269 |
| Primary Biliary Cholangitis | 644172 | LOC644172 | Genetic association                                                       | 22961000 |
| Primary Biliary Cholangitis | 4015   | LOX       | Abnormal expression pattern or level, Experimental model study            | 16023247 |
| Primary Biliary Cholangitis | 4017   | LOXL2     | Abnormal expression pattern or level, Experimental model study            | 16023247 |
| Primary Biliary Cholangitis | 26065  | LSM14A    | Auto-antigen                                                              | 21091667 |
| Primary Biliary Cholangitis | 4049   | LTA       | Abnormal expression pattern or level                                      | 1506629  |
| Primary Biliary Cholangitis | 4052   | LTBP1     | Abnormal expression pattern or level                                      | 9620332  |
| Primary Biliary Cholangitis | 4053   | LTBP2     | Abnormal expression pattern or level                                      | 9620332  |
| Primary Biliary Cholangitis | 4055   | LTBR      | Genetic association                                                       | 21399635 |
| Primary Biliary Cholangitis | 4126   | MANBA     | Genetic association                                                       | 22961000 |
| Primary Biliary Cholangitis | 4137   | MAPT      | Genetic association                                                       | 20639879 |
| Primary Biliary Cholangitis | 4153   | MBL2      | Genetic association                                                       | 11712863 |
| Primary Biliary Cholangitis | 4282   | MIF       | Abnormal expression pattern or level, Biomarker                           | 23913513 |
| Primary Biliary Cholangitis | 1E+08  | MIR4772   | Genetic association                                                       | 26394269 |
| Primary Biliary Cholangitis | 79258  | MMEL1     | Genetic association                                                       | 20639879 |
| Primary Biliary Cholangitis | 4353   | MPO       | Abnormal expression pattern or level                                      | 14512889 |
| Primary Biliary Cholangitis | 931    | MS4A1     | Experimental model study                                                  | 19877182 |
| Primary Biliary Cholangitis | 4489   | MT1A      | Abnormal expression pattern or level, Associated with clinical parameters | 1959846  |
| Primary Biliary Cholangitis | 4582   | MUC1      | Abnormal expression pattern or level                                      | 8675144  |
| Primary Biliary Cholangitis | 4588   | MUC6      | Abnormal expression pattern or level                                      | 9713347  |
| Primary Biliary Cholangitis | 4606   | MYBPC2    | Genetic association                                                       | 26394269 |
| Primary Biliary Cholangitis | 4615   | MYD88     | Abnormal expression pattern or level                                      | 17448566 |
| Primary Biliary Cholangitis | 4664   | NAB1      | Genetic association                                                       | 26394269 |
| Primary Biliary Cholangitis | 4684   | NCAM1     | Abnormal expression pattern or level, Associated with clinical parameters | 24759184 |
| Primary Biliary Cholangitis | 4763   | NF1       | Genetic association                                                       | 25899471 |
| Primary Biliary Cholangitis | 4780   | NFE2L2    | Drug target                                                               | 20055754 |

|                             |        |         |                                                                           |          |
|-----------------------------|--------|---------|---------------------------------------------------------------------------|----------|
| Primary Biliary Cholangitis | 4790   | NFKB1   | Genetic association                                                       | 21399635 |
| Primary Biliary Cholangitis | 4846   | NOS3    | Genetic association                                                       | 22609442 |
| Primary Biliary Cholangitis | 1728   | NQO1    | Abnormal expression pattern or level                                      | 16610002 |
| Primary Biliary Cholangitis | 8856   | NR1I2   | Experimental model study                                                  | 20416375 |
| Primary Biliary Cholangitis | 2908   | NR3C1   | Abnormal expression pattern or level, Associated with clinical parameters | 15635817 |
| Primary Biliary Cholangitis | 4905   | NSF     | Genetic association                                                       | 22961000 |
| Primary Biliary Cholangitis | 23225  | NUP210  | Auto-antigen                                                              | 23814122 |
| Primary Biliary Cholangitis | 23636  | NUP62   | Auto-antigen                                                              | 17960595 |
| Primary Biliary Cholangitis | 4967   | OGDH    | Auto-antigen                                                              | 11050037 |
| Primary Biliary Cholangitis | 167826 | OLIG3   | Genetic association                                                       | 26394269 |
| Primary Biliary Cholangitis | 4988   | OPRM1   | Genetic association                                                       | 18709298 |
| Primary Biliary Cholangitis | 94103  | ORMDL3  | Genetic association                                                       | 20639879 |
| Primary Biliary Cholangitis | 5066   | PAM     | Genetic association                                                       | 26394269 |
| Primary Biliary Cholangitis | 5133   | PDCD1   | Genetic association                                                       | 18041714 |
| Primary Biliary Cholangitis | 5155   | PDGFB   | Genetic association                                                       | 22961000 |
| Primary Biliary Cholangitis | 8050   | PDHX    | Auto-antigen                                                              | 22647870 |
| Primary Biliary Cholangitis | 5166   | PKD4    | Abnormal expression pattern or level                                      | 24293610 |
| Primary Biliary Cholangitis | 5245   | PHB     | Abnormal expression pattern or level, Experimental model study            | 26109312 |
| Primary Biliary Cholangitis | 23228  | PLCL2   | Genetic association                                                       | 21399635 |
| Primary Biliary Cholangitis | 55200  | PLEKHG6 | Genetic association                                                       | 26394269 |
| Primary Biliary Cholangitis | 5371   | PML     | Auto-antigen                                                              | 22503841 |
| Primary Biliary Cholangitis | 56983  | POGLUT1 | Genetic association                                                       | 22961000 |
| Primary Biliary Cholangitis | 5450   | POU2AF1 | Genetic association                                                       | 23000144 |
| Primary Biliary Cholangitis | 5468   | PPARG   | Abnormal expression pattern or level, Experimental model study            | 15880426 |
| Primary Biliary Cholangitis | 23262  | PPIP5K2 | Genetic association                                                       | 26394269 |
| Primary Biliary Cholangitis | 5551   | PRF1    | Abnormal expression pattern or level                                      | 23179144 |
| Primary Biliary Cholangitis | 5619   | PRM1    | Genetic association                                                       | 22961000 |

|                             |        |            |                                                                           |          |
|-----------------------------|--------|------------|---------------------------------------------------------------------------|----------|
| Primary Biliary Cholangitis | 5620   | PRM2       | Genetic association                                                       | 22961000 |
| Primary Biliary Cholangitis | 5727   | PTCH1      | Abnormal expression pattern or level                                      | 17464985 |
| Primary Biliary Cholangitis | 5743   | PTGS2      | Abnormal expression pattern or level                                      | 11584358 |
| Primary Biliary Cholangitis | 26191  | PTPN22     | Genetic association                                                       | 26000122 |
| Primary Biliary Cholangitis | 5890   | RAD51B     | Genetic association                                                       | 21399635 |
| Primary Biliary Cholangitis | 54715  | RBFOX1     | Genetic association                                                       | 20153395 |
| Primary Biliary Cholangitis | 1E+08  | RNA5SP121  | Genetic association                                                       | 26394269 |
| Primary Biliary Cholangitis | 153830 | RNF145     | Genetic association                                                       | 26394269 |
| Primary Biliary Cholangitis | 1E+08  | RNU4ATAC2P | Genetic association                                                       | 26394269 |
| Primary Biliary Cholangitis | 6122   | RPL3       | Genetic association                                                       | 22961000 |
| Primary Biliary Cholangitis | 8986   | RPS6KA4    | Genetic association                                                       | 21399635 |
| Primary Biliary Cholangitis | 6283   | S100A12    | Abnormal expression pattern or level                                      | 25313445 |
| Primary Biliary Cholangitis | 29970  | SCHIP1     | Genetic association                                                       | 26394269 |
| Primary Biliary Cholangitis | 6337   | SCNN1A     | Genetic association                                                       | 22961000 |
| Primary Biliary Cholangitis | 6401   | SELE       | Abnormal expression pattern or level                                      | 7545197  |
| Primary Biliary Cholangitis | 6402   | SELL       | Abnormal expression pattern or level                                      | 7515343  |
| Primary Biliary Cholangitis | 6711   | SEPTBN1    | Experimental model study                                                  | 15566516 |
| Primary Biliary Cholangitis | 26135  | SERBP1     | Genetic association                                                       | 26394269 |
| Primary Biliary Cholangitis | 5265   | SERPINA1   | Mutation                                                                  | 7964438  |
| Primary Biliary Cholangitis | 10019  | SH2B3      | Genetic association                                                       | 21399635 |
| Primary Biliary Cholangitis | 54414  | SIAE       | Genetic association                                                       | 22257840 |
| Primary Biliary Cholangitis | 6614   | SIGLEC1    | Abnormal expression pattern or level                                      | 20653431 |
| Primary Biliary Cholangitis | 6554   | SLC10A1    | Abnormal expression pattern or level, Associated with clinical parameters | 12763363 |
| Primary Biliary Cholangitis | 6580   | SLC22A1    | Genetic association                                                       | 23612856 |
| Primary Biliary Cholangitis | 23446  | SLC44A1    | Abnormal expression pattern or level                                      | 24620780 |
| Primary Biliary Cholangitis | 6522   | SLC4A2     | Experimental model study                                                  | 26396175 |
| Primary Biliary Cholangitis | 200931 | SLC51A     | Abnormal expression pattern or level, Experimental model study            | 16423920 |



|                             |        |          |                                                                              |          |
|-----------------------------|--------|----------|------------------------------------------------------------------------------|----------|
| Primary Biliary Cholangitis | 123264 | SLC51B   | Abnormal expression pattern or level, Experimental model study               | 16423920 |
| Primary Biliary Cholangitis | 9368   | SLC9A3R1 | Abnormal expression pattern or level, Experimental model study               | 19234136 |
| Primary Biliary Cholangitis | 10599  | SLCO1B1  | Abnormal expression pattern or level, Associated with clinical parameters    | 12763363 |
| Primary Biliary Cholangitis | 4087   | SMAD2    | Experimental model study                                                     | 15566516 |
| Primary Biliary Cholangitis | 4088   | SMAD3    | Experimental model study                                                     | 15566516 |
| Primary Biliary Cholangitis | 1E+08  | SNRPGP8  | Genetic association                                                          | 26394269 |
| Primary Biliary Cholangitis | 8651   | SOCS1    | Genetic association                                                          | 21399635 |
| Primary Biliary Cholangitis | 50964  | SOST     | Abnormal expression pattern or level, Associated with clinical parameters    | 27019303 |
| Primary Biliary Cholangitis | 9580   | SOX13    | Auto-antigen                                                                 | 12473246 |
| Primary Biliary Cholangitis | 6662   | SOX9     | Abnormal expression pattern or level                                         | 17464985 |
| Primary Biliary Cholangitis | 6672   | SP100    | Auto-antigen                                                                 | 23859785 |
| Primary Biliary Cholangitis | 11262  | SP140    | Auto-antigen                                                                 | 22647870 |
| Primary Biliary Cholangitis | 93349  | SP140L   | Auto-antigen, Abnormal expression pattern or level, Experimental model study | 26347895 |
| Primary Biliary Cholangitis | 79925  | SPEF2    | Genetic association                                                          | 22961000 |
| Primary Biliary Cholangitis | 6689   | SPIB     | Genetic association                                                          | 20639880 |
| Primary Biliary Cholangitis | 6692   | SPINT1   | Abnormal expression pattern or level                                         | 16941151 |
| Primary Biliary Cholangitis | 6696   | SPP1     | Abnormal expression pattern or level                                         | 12558864 |
| Primary Biliary Cholangitis | 162540 | SPPL2C   | Genetic association                                                          | 22961000 |
| Primary Biliary Cholangitis | 8878   | SQSTM1   | Abnormal expression pattern or level, Experimental model study               | 22098537 |
| Primary Biliary Cholangitis | 6772   | STAT1    | Genetic association                                                          | 21399635 |
| Primary Biliary Cholangitis | 6774   | STAT3    | Abnormal expression pattern or level                                         | 12547716 |
| Primary Biliary Cholangitis | 6775   | STAT4    | Genetic association                                                          | 21399635 |
| Primary Biliary Cholangitis | 6822   | SULT2A1  | Abnormal expression pattern or level                                         | 10726960 |
| Primary Biliary Cholangitis | 7341   | SUMO1    | Auto-antigen                                                                 | 15726652 |
| Primary Biliary Cholangitis | 6613   | SUMO2    | Auto-antigen                                                                 | 15726652 |
| Primary Biliary Cholangitis | 9145   | SYNGR1   | Genetic association                                                          | 21399635 |
| Primary Biliary Cholangitis | 10454  | TAB1     | Genetic association                                                          | 21399635 |

|                             |       |           |                                                                           |          |
|-----------------------------|-------|-----------|---------------------------------------------------------------------------|----------|
| Primary Biliary Cholangitis | 7032  | TFF2      | Abnormal expression pattern or level                                      | 15101998 |
| Primary Biliary Cholangitis | 7033  | TFF3      | Abnormal expression pattern or level                                      | 12395334 |
| Primary Biliary Cholangitis | 7040  | TGFB1     | Experimental model study                                                  | 24124327 |
| Primary Biliary Cholangitis | 7043  | TGFB3     | Abnormal expression pattern or level                                      | 20976842 |
| Primary Biliary Cholangitis | 7048  | TGFBR2    | Experimental model study                                                  | 22576253 |
| Primary Biliary Cholangitis | 51300 | TIMMDC1   | Genetic association                                                       | 22961000 |
| Primary Biliary Cholangitis | 21782 | TJP1      | Abnormal expression pattern or level                                      | 11391535 |
| Primary Biliary Cholangitis | 7098  | TLR3      | Abnormal expression pattern or level                                      | 23026026 |
| Primary Biliary Cholangitis | 7099  | TLR4      | Abnormal expression pattern or level                                      | 23026026 |
| Primary Biliary Cholangitis | 54106 | TLR9      | Abnormal expression pattern or level                                      | 23026026 |
| Primary Biliary Cholangitis | 84286 | TMEM175   | Genetic association                                                       | 26394269 |
| Primary Biliary Cholangitis | 55254 | TMEM39A   | Genetic association                                                       | 22961000 |
| Primary Biliary Cholangitis | 7124  | TNF       | Abnormal expression pattern or level                                      | 23011034 |
| Primary Biliary Cholangitis | 7127  | TNFAIP2   | Genetic association                                                       | 26394269 |
| Primary Biliary Cholangitis | 7128  | TNFAIP3   | Genetic association                                                       | 26394269 |
| Primary Biliary Cholangitis | 79626 | TNFAIP8L2 | Abnormal expression pattern or level, Experimental model study            | 26644386 |
| Primary Biliary Cholangitis | 8795  | TNFRSF10B | Abnormal expression pattern or level, Experimental model study            | 18667695 |
| Primary Biliary Cholangitis | 4982  | TNFRSF11B | Abnormal expression pattern or level                                      | 12663228 |
| Primary Biliary Cholangitis | 7132  | TNFRSF1A  | Genetic association                                                       | 21399635 |
| Primary Biliary Cholangitis | 8771  | TNFRSF6B  | Abnormal expression pattern or level                                      | 24016146 |
| Primary Biliary Cholangitis | 943   | TNFRSF8   | Abnormal expression pattern or level, Auto-antigen                        | 8811053  |
| Primary Biliary Cholangitis | 8743  | TNFSF10   | Abnormal expression pattern or level, Experimental model study            | 18667695 |
| Primary Biliary Cholangitis | 8600  | TNFSF11   | Genetic association                                                       | 21399635 |
| Primary Biliary Cholangitis | 10673 | TNFSF13B  | Abnormal expression pattern or level                                      | 23681290 |
| Primary Biliary Cholangitis | 9966  | TNFSF15   | Genetic association                                                       | 25899471 |
| Primary Biliary Cholangitis | 7292  | TNFSF4    | Genetic association                                                       | 23622253 |
| Primary Biliary Cholangitis | 8744  | TNFSF9    | Abnormal expression pattern or level, Associated with clinical parameters | 20303781 |

|                                |        |        |                                      |          |
|--------------------------------|--------|--------|--------------------------------------|----------|
| Primary Biliary Cholangitis    | 7142   | TNP2   | Genetic association                  | 22936693 |
| Primary Biliary Cholangitis    | 23534  | TNPO3  | Genetic association                  | 22961000 |
| Primary Biliary Cholangitis    | 27327  | TNRC6A | Auto-antigen                         | 21091667 |
| Primary Biliary Cholangitis    | 7157   | TP53   | Abnormal expression pattern or level | 11394648 |
| Primary Biliary Cholangitis    | 7172   | TPMT   | Genetic association                  | 17241387 |
| Primary Biliary Cholangitis    | 7185   | TRAF1  | Genetic association                  | 23125866 |
| Primary Biliary Cholangitis    | 10906  | TRAFD1 | Genetic association                  | 26394269 |
| Primary Biliary Cholangitis    | 7297   | TYK2   | Genetic association                  | 20639879 |
| Primary Biliary Cholangitis    | 7305   | TYROBP | Abnormal expression pattern or level | 23179144 |
| Primary Biliary Cholangitis    | 134510 | UBLCP1 | Genetic association                  | 26394269 |
| Primary Biliary Cholangitis    | 7351   | UCP2   | Abnormal expression pattern or level | 12445169 |
| Primary Biliary Cholangitis    | 133688 | UGT3A1 | Genetic association                  | 22961000 |
| Primary Biliary Cholangitis    | 7412   | VCAM1  | Abnormal expression pattern or level | 24338559 |
| Primary Biliary Cholangitis    | 7415   | VCP    | Auto-antigen, Biomarker              | 16640662 |
| Primary Biliary Cholangitis    | 7421   | VDR    | Genetic association                  | 22690210 |
| Primary Biliary Cholangitis    | 7422   | VEGFA  | Experimental model study             | 10514389 |
| Primary Biliary Cholangitis    | 79679  | VTCN1  | Abnormal expression pattern or level | 21120594 |
| Primary Biliary Cholangitis    | 7448   | VTN    | Abnormal expression pattern or level | 7507546  |
| Primary Biliary Cholangitis    | 7480   | WNT10B | Abnormal expression pattern or level | 11559656 |
| Primary Biliary Cholangitis    | 7472   | WNT2   | Abnormal expression pattern or level | 11559656 |
| Primary Biliary Cholangitis    | 7482   | WNT2B  | Genetic association                  | 11488641 |
| Primary Biliary Cholangitis    | 2547   | XRCC6  | Abnormal expression pattern or level | 11559656 |
| Primary Biliary Cholangitis    | 57621  | ZBTB2  | Auto-antigen                         | 22647870 |
| Primary Biliary Cholangitis    | 7538   | ZFP36  | Abnormal expression pattern or level | 11559656 |
| Primary Biliary Cholangitis    | 124626 | ZPBP2  | Genetic association                  | 22961000 |
| Primary Sclerosing Cholangitis | 80339  | PNPLA3 | Genetic association                  | 23505555 |
| Primary Sclerosing Cholangitis | 4254   | KITLG  | Associated with clinical parameters  | 15777700 |

|                                |       |          |                                                                           |          |
|--------------------------------|-------|----------|---------------------------------------------------------------------------|----------|
| Primary Sclerosing Cholangitis | 2309  | FOXO3    | Abnormal expression pattern or level                                      | 23295054 |
| Primary Sclerosing Cholangitis | 50674 | NEUROG3  | Abnormal expression pattern or level, Experimental model study            | 24925797 |
| Primary Sclerosing Cholangitis | 57379 | AICDA    | Abnormal expression pattern or level                                      | 18306229 |
| Primary Sclerosing Cholangitis | 249   | ALPL     | Abnormal expression pattern or level, Associated with clinical parameters | 26945698 |
| Primary Sclerosing Cholangitis | 7082  | TJP1     | Abnormal expression pattern or level                                      | 11391535 |
| Primary Sclerosing Cholangitis | 55188 | RIC8B    | Genetic association                                                       | 26974007 |
| Primary Sclerosing Cholangitis | 4790  | NFKB1    | Genetic association                                                       | 26974007 |
| Primary Sclerosing Cholangitis | 4053  | LTBP2    | Abnormal expression pattern or level                                      | 9620332  |
| Primary Sclerosing Cholangitis | 4052  | LTBP1    | Abnormal expression pattern or level                                      | 9620332  |
| Primary Sclerosing Cholangitis | 1131  | CHRM3    | Auto-antigen                                                              | 24750585 |
| Primary Sclerosing Cholangitis | 5657  | PRTN3    | Auto-antigen, Biomarker                                                   | 22107137 |
| Primary Sclerosing Cholangitis | 4057  | LTF      | Auto-antigen                                                              | 11472410 |
| Primary Sclerosing Cholangitis | 1511  | CTSG     | Auto-antigen                                                              | 1327593  |
| Primary Sclerosing Cholangitis | 3123  | HLA-DRB1 | Genetic association                                                       | 25655558 |
| Primary Sclerosing Cholangitis | 3106  | HLA-B    | Genetic association                                                       | 25655558 |
| Primary Sclerosing Cholangitis | 7124  | TNF      | Genetic association                                                       | 11454808 |
| Primary Sclerosing Cholangitis | 432   | ASGR1    | Auto-antigen                                                              | 26220739 |
| Primary Sclerosing Cholangitis | 2952  | GSTT1    | Auto-antigen                                                              | 18242955 |
| Primary Sclerosing Cholangitis | 5970  | RELA     | Abnormal expression pattern or level, Experimental model study            | 26526716 |
| Primary Sclerosing Cholangitis | 4792  | NFKBIA   | Abnormal expression pattern or level, Experimental model study            | 26526716 |
| Primary Sclerosing Cholangitis | 602   | BCL3     | Abnormal expression pattern or level, Experimental model study            | 26526716 |
| Primary Sclerosing Cholangitis | 7099  | TLR4     | Abnormal expression pattern or level                                      | 17408653 |
| Primary Sclerosing Cholangitis | 5595  | MAPK3    | Abnormal expression pattern or level                                      | 17408653 |
| Primary Sclerosing Cholangitis | 5594  | MAPK1    | Abnormal expression pattern or level                                      | 17408653 |
| Primary Sclerosing Cholangitis | 2002  | ELK1     | Abnormal expression pattern or level                                      | 17408653 |
| Primary Sclerosing Cholangitis | 947   | CD34     | Abnormal expression pattern or level, Experimental model study            | 19827165 |
| Primary Sclerosing Cholangitis | 79661 | NEIL1    | Mutation, Experimental model study                                        | 19443904 |

|                                |        |           |                                                                           |          |
|--------------------------------|--------|-----------|---------------------------------------------------------------------------|----------|
| Primary Sclerosing Cholangitis | 4595   | MUTYH     | Mutation, Experimental model study                                        | 19443904 |
| Primary Sclerosing Cholangitis | 929    | CD14      | Abnormal expression pattern or level, Associated with clinical parameters | 26970220 |
| Primary Sclerosing Cholangitis | 925    | CD8A      | Experimental model study                                                  | 24038154 |
| Primary Sclerosing Cholangitis | 339221 | ENPP7     | Abnormal expression pattern or level                                      | 25100243 |
| Primary Sclerosing Cholangitis | 79048  | SECISBP2  | Abnormal expression pattern or level, Experimental model study            | 17109383 |
| Primary Sclerosing Cholangitis | 761    | CA3       | Abnormal expression pattern or level, Experimental model study            | 17109383 |
| Primary Sclerosing Cholangitis | 22914  | KLRK1     | Genetic association                                                       | 18023027 |
| Primary Sclerosing Cholangitis | 5054   | SERPINE1  | Abnormal expression pattern or level, Experimental model study            | 24390753 |
| Primary Sclerosing Cholangitis | 4893   | NRAS      | Abnormal expression pattern or level, Experimental model study            | 24390753 |
| Primary Sclerosing Cholangitis | 3569   | IL6       | Abnormal expression pattern or level, Experimental model study            | 24390753 |
| Primary Sclerosing Cholangitis | 6347   | CCL2      | Abnormal expression pattern or level, Experimental model study            | 24390753 |
| Primary Sclerosing Cholangitis | 920    | CD4       | Abnormal expression pattern or level                                      | 23306841 |
| Primary Sclerosing Cholangitis | 3122   | HLA-DRA   | Genetic association                                                       | 17394153 |
| Primary Sclerosing Cholangitis | 3119   | HLA-DQB1  | Genetic association                                                       | 17394153 |
| Primary Sclerosing Cholangitis | 3117   | HLA-DQA1  | Genetic association                                                       | 17394153 |
| Primary Sclerosing Cholangitis | 1080   | CFTR      | Genetic association                                                       | 18992954 |
| Primary Sclerosing Cholangitis | 4843   | NOS2      | Abnormal expression pattern or level, Experimental model study            | 12612912 |
| Primary Sclerosing Cholangitis | 8743   | TNFSF10   | Experimental model study                                                  | 18667695 |
| Primary Sclerosing Cholangitis | 8795   | TNFRSF10B | Experimental model study                                                  | 18667695 |
| Primary Sclerosing Cholangitis | 29888  | STRN4     | Genetic association                                                       | 23603763 |
| Primary Sclerosing Cholangitis | 23235  | SIK2      | Genetic association                                                       | 23603763 |
| Primary Sclerosing Cholangitis | 10019  | SH2B3     | Genetic association                                                       | 23603763 |
| Primary Sclerosing Cholangitis | 8624   | PSMG1     | Genetic association                                                       | 23603763 |
| Primary Sclerosing Cholangitis | 25865  | PRKD2     | Genetic association                                                       | 23603763 |
| Primary Sclerosing Cholangitis | 59067  | IL21      | Genetic association                                                       | 23603763 |
| Primary Sclerosing Cholangitis | 3558   | IL2       | Genetic association                                                       | 23603763 |
| Primary Sclerosing Cholangitis | 51564  | HDAC7     | Genetic association                                                       | 23603763 |

|                                |       |          |                                                                           |          |
|--------------------------------|-------|----------|---------------------------------------------------------------------------|----------|
| Primary Sclerosing Cholangitis | 940   | CD28     | Genetic association                                                       | 23603763 |
| Primary Sclerosing Cholangitis | 10666 | CD226    | Genetic association                                                       | 23603763 |
| Primary Sclerosing Cholangitis | 60468 | BACH2    | Genetic association                                                       | 23603763 |
| Primary Sclerosing Cholangitis | 6311  | ATXN2    | Genetic association                                                       | 23603763 |
| Primary Sclerosing Cholangitis | 7448  | VTN      | Abnormal expression pattern or level                                      | 7507546  |
| Primary Sclerosing Cholangitis | 718   | C3       | Abnormal expression pattern or level                                      | 7507546  |
| Primary Sclerosing Cholangitis | 5743  | PTGS2    | Abnormal expression pattern or level                                      | 11584358 |
| Primary Sclerosing Cholangitis | 9536  | PTGES    | Abnormal expression pattern or level                                      | 23900502 |
| Primary Sclerosing Cholangitis | 4921  | DDR2     | Abnormal expression pattern or level                                      | 12765478 |
| Primary Sclerosing Cholangitis | 3576  | CXCL8    | Abnormal expression pattern or level                                      | 26866350 |
| Primary Sclerosing Cholangitis | 9965  | FGF19    | Experimental model study                                                  | 26418580 |
| Primary Sclerosing Cholangitis | 5645  | PRSS2    | Biomarker                                                                 | 17640760 |
| Primary Sclerosing Cholangitis | 3371  | TNC      | Abnormal expression pattern or level, Associated with clinical parameters | 10605691 |
| Primary Sclerosing Cholangitis | 2833  | CXCR3    | Abnormal expression pattern or level, Experimental model study            | 16785557 |
| Primary Sclerosing Cholangitis | 2826  | CCR10    | Abnormal expression pattern or level, Experimental model study            | 16785557 |
| Primary Sclerosing Cholangitis | 56477 | CCL28    | Abnormal expression pattern or level, Experimental model study            | 16785557 |
| Primary Sclerosing Cholangitis | 7157  | TP53     | Abnormal expression pattern or level, Biomarker                           | 23599650 |
| Primary Sclerosing Cholangitis | 942   | CD86     | Abnormal expression pattern or level                                      | 9924426  |
| Primary Sclerosing Cholangitis | 4072  | EPCAM    | Abnormal expression pattern or level                                      | 16364680 |
| Primary Sclerosing Cholangitis | 10599 | SLCO1B1  | Abnormal expression pattern or level                                      | 11454187 |
| Primary Sclerosing Cholangitis | 1244  | ABCC2    | Abnormal expression pattern or level                                      | 11454187 |
| Primary Sclerosing Cholangitis | 5244  | ABCB4    | Mutation                                                                  | 26324191 |
| Primary Sclerosing Cholangitis | 8764  | TNFRSF14 | Genetic association                                                       | 22521342 |
| Primary Sclerosing Cholangitis | 79258 | MMEL1    | Genetic association                                                       | 22521342 |
| Primary Sclerosing Cholangitis | 84162 | KIAA1109 | Genetic association                                                       | 22521342 |
| Primary Sclerosing Cholangitis | 2524  | FUT2     | Genetic association                                                       | 22521342 |
| Primary Sclerosing Cholangitis | 9368  | SLC9A3R1 | Abnormal expression pattern or level, Experimental model study            | 19234136 |

|                                |       |          |                                                                           |          |
|--------------------------------|-------|----------|---------------------------------------------------------------------------|----------|
| Primary Sclerosing Cholangitis | 9971  | NR1H4    | Abnormal expression pattern or level, Associated with clinical parameters | 23348121 |
| Primary Sclerosing Cholangitis | 2191  | FAP      | Abnormal expression pattern or level                                      | 10347120 |
| Primary Sclerosing Cholangitis | 3559  | IL2RA    | Genetic association                                                       | 22554193 |
| Primary Sclerosing Cholangitis | 5293  | PIK3CD   | Mutation                                                                  | 25352054 |
| Primary Sclerosing Cholangitis | 7130  | TNFAIP6  | Abnormal expression pattern or level                                      | 17162367 |
| Primary Sclerosing Cholangitis | 4090  | SMAD5    | Abnormal expression pattern or level                                      | 17162367 |
| Primary Sclerosing Cholangitis | 931   | MS4A1    | Abnormal expression pattern or level                                      | 17162367 |
| Primary Sclerosing Cholangitis | 4314  | MMP3     | Genetic association                                                       | 21134112 |
| Primary Sclerosing Cholangitis | 10082 | GPC6     | Genetic association                                                       | 19944697 |
| Primary Sclerosing Cholangitis | 4485  | MST1     | Genetic association                                                       | 21151127 |
| Primary Sclerosing Cholangitis | 10018 | BCL2L11  | Genetic association                                                       | 21151127 |
| Primary Sclerosing Cholangitis | 6925  | TCF4     | Genetic association                                                       | 22821403 |
| Primary Sclerosing Cholangitis | 2859  | GPR35    | Genetic association                                                       | 22821403 |
| Primary Sclerosing Cholangitis | 3240  | HP       | Genetic association                                                       | 17357835 |
| Primary Sclerosing Cholangitis | 10803 | CCR9     | Abnormal expression pattern or level, Experimental model study            | 15557349 |
| Primary Sclerosing Cholangitis | 6370  | CCL25    | Abnormal expression pattern or level, Experimental model study            | 15557349 |
| Primary Sclerosing Cholangitis | 8174  | MADCAM1  | Abnormal expression pattern or level, Experimental model study            | 11943728 |
| Primary Sclerosing Cholangitis | 1236  | CCR7     | Abnormal expression pattern or level, Experimental model study            | 11943728 |
| Primary Sclerosing Cholangitis | 6366  | CCL21    | Abnormal expression pattern or level, Experimental model study            | 11943728 |
| Primary Sclerosing Cholangitis | 960   | CD44     | Abnormal expression pattern or level                                      | 12077104 |
| Primary Sclerosing Cholangitis | 3126  | HLA-DRB4 | Biomarker                                                                 | 8276178  |
| Primary Sclerosing Cholangitis | 3107  | HLA-C    | Genetic association                                                       | 24744588 |
| Primary Sclerosing Cholangitis | 3091  | HIF1A    | Abnormal expression pattern or level, Experimental model study            | 22271822 |
| Primary Sclerosing Cholangitis | 2023  | ENO1     | Auto-antigen                                                              | 9649223  |
| Primary Sclerosing Cholangitis | 5174  | PDZK1    | Auto-antigen                                                              | 19653288 |
| Primary Sclerosing Cholangitis | 2064  | ERBB2    | Abnormal expression pattern or level                                      | 1374219  |
| Primary Sclerosing Cholangitis | 3605  | IL17A    | Abnormal expression pattern or level                                      | 23564624 |

|                                |       |          |                                                                           |          |
|--------------------------------|-------|----------|---------------------------------------------------------------------------|----------|
| Primary Sclerosing Cholangitis | 7012  | TERC     | Mutation                                                                  | 23933276 |
| Primary Sclerosing Cholangitis | 3875  | KRT18    | Abnormal expression pattern or level, Associated with clinical parameters | 26195313 |
| Primary Sclerosing Cholangitis | 4851  | NOTCH1   | Abnormal expression pattern or level                                      | 15887117 |
| Primary Sclerosing Cholangitis | 2525  | FUT3     | Genetic association                                                       | 26192140 |
| Primary Sclerosing Cholangitis | 5009  | OTC      | Abnormal expression pattern or level, Biomarker                           | 24930642 |
| Primary Sclerosing Cholangitis | 1956  | EGFR     | Abnormal expression pattern or level, Experimental model study            | 25915403 |
| Primary Sclerosing Cholangitis | 6822  | SULT2A1  | Abnormal expression pattern or level                                      | 26504856 |
| Primary Sclerosing Cholangitis | 8856  | NR1I2    | Abnormal expression pattern or level                                      | 26504856 |
| Primary Sclerosing Cholangitis | 57817 | HAMP     | Abnormal expression pattern or level                                      | 26270641 |
| Primary Sclerosing Cholangitis | 4313  | MMP2     | Genetic association                                                       | 23809662 |
| Primary Sclerosing Cholangitis | 4586  | MUC5AC   | Abnormal expression pattern or level                                      | 18475301 |
| Primary Sclerosing Cholangitis | 4585  | MUC4     | Abnormal expression pattern or level                                      | 18475301 |
| Primary Sclerosing Cholangitis | 4854  | NOTCH3   | Abnormal expression pattern or level                                      | 11732008 |
| Primary Sclerosing Cholangitis | 3845  | KRAS     | Mutation, Associated with clinical parameters                             | 11180865 |
| Primary Sclerosing Cholangitis | 1E+08 | MICA     | Genetic association                                                       | 17383044 |
| Primary Sclerosing Cholangitis | 3280  | HES1     | Abnormal expression pattern or level, Experimental model study            | 23207146 |
| Primary Sclerosing Cholangitis | 3651  | PDX1     | Abnormal expression pattern or level, Experimental model study            | 23207146 |
| Primary Sclerosing Cholangitis | 1673  | DEFB4A   | Abnormal expression pattern or level                                      | 15382127 |
| Primary Sclerosing Cholangitis | 1672  | DEFB1    | Abnormal expression pattern or level                                      | 15382127 |
| Primary Sclerosing Cholangitis | 6555  | SLC10A2  | Experimental model study                                                  | 26172874 |
| Primary Sclerosing Cholangitis | 1237  | CCR8     | Abnormal expression pattern or level                                      | 23811304 |
| Primary Sclerosing Cholangitis | 6346  | CCL1     | Abnormal expression pattern or level                                      | 23811304 |
| Primary Sclerosing Cholangitis | 4277  | MICB     | Genetic association                                                       | 11584356 |
| Primary Sclerosing Cholangitis | 3128  | HLA-DRB6 | Genetic association                                                       | 17257319 |
| Primary Sclerosing Cholangitis | 3125  | HLA-DRB3 | Genetic association                                                       | 17257319 |
| Primary Sclerosing Cholangitis | 1029  | CDKN2A   | Abnormal DNA methylation                                                  | 12738733 |
| Primary Sclerosing Cholangitis | 720   | C4A      | Abnormal expression pattern or level                                      | 24551304 |



|                                |        |         |                                                                                      |          |
|--------------------------------|--------|---------|--------------------------------------------------------------------------------------|----------|
| Primary Sclerosing Cholangitis | 50943  | FOXP3   | Abnormal expression pattern or level                                                 | 24412607 |
| Primary Sclerosing Cholangitis | 28231  | SLCO4A1 | Experimental model study                                                             | 12044520 |
| Primary Sclerosing Cholangitis | 8647   | ABCB11  | Experimental model study                                                             | 12044520 |
| Primary Sclerosing Cholangitis | 6280   | S100A9  | Abnormal expression pattern or level, Biomarker                                      | 22253789 |
| Primary Sclerosing Cholangitis | 3586   | IL10    | Abnormal expression pattern or level                                                 | 9543183  |
| Primary Sclerosing Cholangitis | 6774   | STAT3   | Experimental model study                                                             | 20193684 |
| Primary Sclerosing Cholangitis | 7033   | TFF3    | Abnormal expression pattern or level                                                 | 15101998 |
| Primary Sclerosing Cholangitis | 1755   | DMBT1   | Abnormal expression pattern or level                                                 | 15101998 |
| Primary Sclerosing Cholangitis | 7852   | CXCR4   | Abnormal expression pattern or level                                                 | 12746476 |
| Primary Sclerosing Cholangitis | 6387   | CXCL12  | Abnormal expression pattern or level                                                 | 12746476 |
| Primary Sclerosing Cholangitis | 3383   | ICAM1   | Genetic association                                                                  | 15123348 |
| Primary Sclerosing Cholangitis | 151306 | GPBAR1  | Genetic association                                                                  | 21691110 |
| Primary Sclerosing Cholangitis | 912    | CD1D    | Abnormal expression pattern or level                                                 | 25855031 |
| Primary Sclerosing Cholangitis | 1234   | CCR5    | Mutation                                                                             | 21134114 |
| Primary Sclerosing Cholangitis | 6352   | CCL5    | Genetic association                                                                  | 17519498 |
| Primary Sclerosing Cholangitis | 7046   | TGFBR1  | Experimental model study                                                             | 27115285 |
| Primary Sclerosing Cholangitis | 7040   | TGFB1   | Experimental model study                                                             | 27115285 |
| Primary Sclerosing Cholangitis | 4088   | SMAD3   | Experimental model study                                                             | 27115285 |
| Primary Sclerosing Cholangitis | 4087   | SMAD2   | Experimental model study                                                             | 27115285 |
| Primary Sclerosing Cholangitis | 6344   | SCTR    | Experimental model study                                                             | 27115285 |
| Primary Sclerosing Cholangitis | 4803   | NGF     | Experimental model study                                                             | 27115285 |
| Primary Sclerosing Cholangitis | 7296   | TXNRD1  | Abnormal expression pattern or level, Associated with clinical parameters, Biomarker | 22370917 |
| Primary Sclerosing Cholangitis | 2745   | GLRX    | Abnormal expression pattern or level, Associated with clinical parameters, Biomarker | 22370917 |
| Primary Sclerosing Cholangitis | 5966   | REL     | Genetic association                                                                  | 21425313 |
| Primary Sclerosing Cholangitis | 64170  | CARD9   | Genetic association                                                                  | 21425313 |
| Primary Sclerosing Cholangitis | 54106  | TLR9    | Abnormal expression pattern or level, Biomarker                                      | 25160604 |
| Primary Sclerosing Cholangitis | 114548 | NLRP3   | Abnormal expression pattern or level, Biomarker                                      | 25160604 |

|                                |      |       |                                      |          |
|--------------------------------|------|-------|--------------------------------------|----------|
| Primary Sclerosing Cholangitis | 7412 | VCAM1 | Abnormal expression pattern or level | 24338559 |
| Primary Sclerosing Cholangitis | 154  | ADRB2 | Experimental model study             | 20921947 |

---

**Supplemental Table 2: Overlapping of the cholangiopathies associated genes.** This table shows the cholangiopathies (Biliary Atresia, Primary Biliary Cholangitis and Primary Sclerosing Cholangitis) overlapping gene information and Genes associated with IHC (intrahepatic cholestasis) and PLD (polycystic liver disease).

| Categories                                          | Gene Symbol                                                                                                                                                                                                                                                                                                                                          |
|-----------------------------------------------------|------------------------------------------------------------------------------------------------------------------------------------------------------------------------------------------------------------------------------------------------------------------------------------------------------------------------------------------------------|
| Genes shared by BA, PBC and PSC                     | HAMP, FOXP3, NR1I2, TNFSF10, ABCB11, TP53, TNF, TLR4, TGFB1, STAT3, CXCL12, PTGS2, ABCB4, NFKB1, SMAD3, KRT18, IL17A, IL10, CXCL8, IL6, IL2, ICAM1, HLA-DRB4, HLA-DRB1, HLA-B, HIF1A, CXCR3, ENO1, ABCC2, CCR5, CD86, CD14, CD8A, CD4                                                                                                                |
| Genes shared by BA and PBC, not associated with PSC | IL23R, IL33, SOST, SERBP1, CXCL13, HDAC4, VEGFA, TLR3, STAT1, SPP1, SPINT1, SOX9, SLC10A1, SELE, CX3CL1, PRF1, PHB, TNFRSF11B, NCAM1, CXCL9, MIF, LEP, KRT8, KRT7, ITGB2, CXCL10, IL18, IL12B, IL6R, IL1RN, IGF1, IFNG, HLA-A, NR3C1, GLI2, FH, FCGR3B, FCGR3A, DPP4, CYP7A1, CYP2E1, CX3CR1, COL1A1, CD68, CD40, CD80, C1QA, FASLG, FAS, AKT1, JAG1 |
| Genes shared by BA and PSC, not associated with PBC | KLRK1, NR1H4, SLC10A2, CCL5, CCL2, MAPK1, NOTCH3, NOS2, MMP3, MMP2, HES1, GPR35, CD34                                                                                                                                                                                                                                                                |

|                                                            |                                                                                                                                                                                                                                                                                                                                                                                                                                                                                                                                                                                                                                      |
|------------------------------------------------------------|--------------------------------------------------------------------------------------------------------------------------------------------------------------------------------------------------------------------------------------------------------------------------------------------------------------------------------------------------------------------------------------------------------------------------------------------------------------------------------------------------------------------------------------------------------------------------------------------------------------------------------------|
| <p>Genes shared by PBC and PSC, not associated with BA</p> | <p>ALPL, ATXN2, BCL2L11, BCL3, C3, C4A, CCL28, CCR10, CCR7, CD28, CD44, CDKN2A, CHRM3, DDR2, DEFB1, DEFB4A, DMBT1, FGF19, FOXO3, GSTT1, HLA-DQA1, HLA-DQB1, HLA-DRA, IL21, IL2RA, LTBP1, LTBP2, MMEL1, MS4A1, SH2B3, SLC9A3R1, SLCO1B1, SMAD2, SULT2A1, TFF3, TLR9, TNFRSF10B, VCAM1, VTN</p>                                                                                                                                                                                                                                                                                                                                        |
| <p>Unique genes in BA</p>                                  | <p>D2HGDH, AQP12B, AQP12A, DUSP28, RTP5, RFX6, LVRN, COMMD1, PRICKLE1, IL17F, LMLN, ING5, TMEM117, EVA1A, COL18A1, ULBP1, ULBP2, C2orf54, THSD4, ULBP3, LMF1, SOX17, CALCOCO1, ZFAT, RNPEPL1, MEPE, CRTAM, CFC1, PCBP3, KLRF1, TLR8, TLR7, ANKMY1, THAP4, INVS, IL36RN, FGF21, SNED1, BAMBI, ATG4B, PASK, CAPN10, SPINT2, POSTN, STK25, YAP1, IRF9, NR1I3, FARP2, ZEB2, ADIPOQ, IL32, MBD4, APLN, FCGBP, PROM1, DLK1, LGR5, NR0B2, KLRC4, ZIC3, XPNPEP1, VIM, VIL1, USF2, TNXB, TLR2, TIMP4, TIMP3, TIMP2, TIMP1, THPO, TGFB2, TEK, HNF1B, STAT6, SNAI1, SHH, SFTPD, SELP, CXCL5, CXCL11, CCL3, S100A4, RRAS, RORC, RBP4, PTPRC,</p> |

|                                       |                                                                                                                                                                                                                                                                                                                                                                                                                                                                                                                                                                                                                                |
|---------------------------------------|--------------------------------------------------------------------------------------------------------------------------------------------------------------------------------------------------------------------------------------------------------------------------------------------------------------------------------------------------------------------------------------------------------------------------------------------------------------------------------------------------------------------------------------------------------------------------------------------------------------------------------|
| <p>Unique genes in BA (continued)</p> | <p>PTEN, MAPK8, PPP2R2A, PPIA, UBL3, PLAU, ENPP2, PDGFA, NOTCH2, NOS1, NKG7, SEPTIN2, MX2, MX1, MMP9, MMP7, MMP1, MBD1, MAOB, LGALS3, LAMC2, LAMB1, KLRC2, KIT, KDR, ITGB8, ITGAL, ITGA3, ITGA2, IRF7, IRF3, IL15, IL13, CXCR2, IGFBP3, IGFBP1, IFNB1, HSP90AA1, HPCAL1, HOXC13, FOXA2, HMGB1, HGF, HDLBP, HDC, GZMB, GZMA, GSTA1, CXCL2, GPT, GPC1, GHR, GATA3, FGF2, EPAS1, ENG, EGF, EDN1, DTYMK, DPEP1, DNMT3A, DNMT1, DLG3, CYP3A4, CYP2C19, CYP2B6, CYP1A2, CTGF, COL4A1, COL3A1, COL1A2, CCR6, CDX4, CDH1, CD69, CASP3, CASP1, C3AR1, BOK, BMP7, AZU1, KIF1A, ARF6, APOC3, APOC2, ANGPT2, ANGPT1, AGXT, ADD3, ACTA1</p> |
| <p>Unique genes in PBC</p>            | <p>ABCC3, ABCC4, ABCC5, ABCG2, AGO1, AIRE, AKAP11, ALB, ALDH2, ANPEP, ANXA2, AOC3, APOE, APOH, AQP1, ARRB1, ATM, B3GAT1, BCL2, BHMT, BMI1, BRAP, BTNL2, C4B, C5, C5orf30, C6orf10, CA2, CAPSL, CAV1, CAV2, CCDC88B, CCL20, CCL7, CCL8, CCR2, CD101, CD180, CD19, CD1a, CD1C, CD1d, CD27, CD274, CD40LG, CD74, CD79A, CD83, CDKN1A, CDKN1B, CENPB,</p>                                                                                                                                                                                                                                                                          |

Unique genes in PBC (continued)

CHUK, CISD2, CLDN14, CLEC16A, CNR1, CNR2, COL11A2, CRHR1, CRP, CTLA4, CXCL16, CXCR5, DBT, DDR1, DDX6, DENND1B, DEXI, DGKQ, DLAT, DLEU1, DLST, EBAG9, EDN2, EIF2AK2, EIF3KP1, ELMO1, ENTPD1, ENTPD2, EPO, ESR1, ESR2, ESRRG, EXOC3L4, FAM183DP, FBXL20, FCGR2A, FCRL3, FGFR1, FN1, GAK, GCSH, GHRL, GIN1, GNLY, GRIPAP1, GSDMB, GSTM1, HELZ2, HK1, HLA-DPB1, HLA-DQA2, HLA-DQB2, HMGCR, HSPA4, ICOS, ICOSLG, IDO1, IDUA, IFNA1, IFT80, IGF1R, IHH, IKZF3, IL12A, IL12A, IL12RB2, IL18R1, IL18RAP, IL1B, IL1R1, IL1RL1, IL1RL2, IL23A, IL4, IL5, IL7R, IRF5, IRF8, ITGA4, ITGA5, ITGAX, KANSL1, KLHL12, KLHL7, KRT19, KRT23, LAMP1, LAMP2, LBH, LBR, LGALS3BP, LOC100533842, LOC102723649, LOC285626, LOC442263, LOC644172, LOX, LOXL2, LSM14A, LTA, LTBR, MANBA, MAPT, MBL2, MIR4772, MPO, MT1A, MUC1, MUC6, MYBPC2, MYD88, NAB1, NF1, NFE2L2, NOS3, NQO1, NSF, NUP210, NUP62, OGDH, OLIG3, OPRM1, ORMDL3, PAM, PDCD1, PDGFB, PDHX, PDK4, PLCL2, PLEKHG6, PML, POGLUT1,

|                                        |                                                                                                                                                                                                                                                                                                                                                                                                                                                                                                                                                                                                                                                            |
|----------------------------------------|------------------------------------------------------------------------------------------------------------------------------------------------------------------------------------------------------------------------------------------------------------------------------------------------------------------------------------------------------------------------------------------------------------------------------------------------------------------------------------------------------------------------------------------------------------------------------------------------------------------------------------------------------------|
| <p>Unique genes in PBC (continued)</p> | <p>POU2AF1, PPARG, PPIP5K2, PRM1, PRM2, PTCH1, PTPN22, RAD51B, RBFOX1, RNA5SP121, RNF145, RNU4ATAC2P, RPL3, RPS6KA4, S100A12, SCHIP1, SCNN1A, SELL, SEPTIN1, SERPINA1, SIAE, SIGLEC1, SLC22A1, SLC44A1, SLC4A2, SLC51A, SLC51B, SNRPGP8, SOCS1, SOX13, SP100, SP140, SP140L, SPEF2, SPIB, SPPL2C, SQSTM1, STAT4, SUMO1, SUMO2, SYNGR1, TAB1, TFF2, TGFB3, TGFB2, TIMMDC1, TJP1, TMEM175, TMEM39A, TNFAIP2, TNFAIP3, TNFAIP8L2, TNFRSF1A, TNFRSF6B, TNFRSF8, TNFSF11, TNFSF13B, TNFSF15, TNFSF4, TNFSF9, TNP2, TNPO3, TNRC6A, TPMT, TRAF1, TRAFD1, TYK2, TYROBP, UBLCP1, UCP2, UGT3A1, VCP, VDR, VTCN1, WNT10B, WNT2, WNT2B, XRCC6, ZBTB2, ZFP36, ZBPB2</p> |
| <p>Unique genes in PSC</p>             | <p>PNPLA3, KITLG, NEUROG3, AICDA, TJP1, RIC8B, PRTN3, LTF, CTSG, ASGR1, RELA, NFKBIA, MAPK3, ELK1, NEIL1, MUTYH, ENPP7, SECISBP2, CA3, SERPINE1, NRAS, CFTR, STRN4, SIK2, PSMG1, PRKD2, HDAC7, CD226, BACH2, PTGES, PRSS2, TNC, EPCAM, TNFRSF14, KIAA1109, FUT2, FAP, PIK3CD, TNFAIP6,</p>                                                                                                                                                                                                                                                                                                                                                                 |

|                                 |                                                                                                                                                                                                                                                                                    |
|---------------------------------|------------------------------------------------------------------------------------------------------------------------------------------------------------------------------------------------------------------------------------------------------------------------------------|
| Unique genes in PSC (continued) | SMAD5, GPC6, MST1, TCF4, HP, CCR9, CCL25, MADCAM1, CCL21, HLA-C, PDZK1, ERBB2, TERC, NOTCH1, FUT3, OTC, EGFR, MUC5AC, MUC4, KRAS, MICA, PDX1, CCR8, CCL1, MICB, HLA-DRB6, HLA-DRB3, SLCO4A1, S100A9, CXCR4, GPBAR1, CD1D, TGFB1, SCTR, NGF, TXNRD1, GLRX, REL, CARD9, NLRP3, ADRB2 |
| Genes associated with IHC       | ABCB11, AT8B1, TJP2, AP1S1, MAFG, MAF, EGR1, NR1H4, NROB2, CXCL2, SLC22A1, SLC22A2, ENTPD1, ABCB4, HLA-DRB1, ABCC2, SLC25A13, HLA-DQB1, NR1I2, ESR2, SHBG, APOE, HLA-G, CYP1A1, CYP1B1, GGTL1, CIRH1A, VPS33B, ARC, NR1I3, FGF19, GPD2, NOL3, SERPINA1, TEK, SLC10A2               |
| Genes associated with PLD       | PRKCSH, SEC63, LRP5, HDAC6, PRKD2, PKD2, PRKD1, PKD1, NXN, CDC25A, PKD2L1, RASGRF1, CDC25C, SIL1                                                                                                                                                                                   |



**Supplemental Table 3: Summary of Transcription factors and miRNAs subcore genes co-regulatory network**

| <b>Terms</b>                                 | <b>Number</b> |
|----------------------------------------------|---------------|
| <b>Nodes</b>                                 | 589           |
| <b>Interactions</b>                          | 11,553        |
| <b>subcore genes</b>                         | 14            |
| <b>Transcription factors</b>                 | 282           |
| <b>miRNAs</b>                                | 297           |
| <b>TF feed forward loops</b>                 | 5,575         |
| <b>miRNA feed forward loops</b>              | 1,385         |
| <b>TF-miRNA composite feed forward loops</b> | 332           |

**Supplemental Table 4: Lists of transcription factors and miRNAs that regulate subcore genes.** This table shows transcription factors and miRNAs that regulate subcore genes.

| <b>Categories</b>                               | <b>Gene Symbol</b>                                                                                                                                                                                                                                                                                                                                                                                                                                                                                                                                                                                                                                                                 |
|-------------------------------------------------|------------------------------------------------------------------------------------------------------------------------------------------------------------------------------------------------------------------------------------------------------------------------------------------------------------------------------------------------------------------------------------------------------------------------------------------------------------------------------------------------------------------------------------------------------------------------------------------------------------------------------------------------------------------------------------|
| Subcore genes                                   | FOXP3, HIF1A, IL10, IL17A, IL2, IL6, NFKB1, PTGS2, SMAD3, STAT3, TGFB1, TLR4, TNF, TP53                                                                                                                                                                                                                                                                                                                                                                                                                                                                                                                                                                                            |
| Transcription factors that target subcore genes | ADNP, AEBP2, AFF1, AHR, AR, ARID3A, ARNT, ARNTL, ASCL1, ASCL2, ATF1, ATF2, ATF3, ATF5, ATOH1, BACH1, BACH2, BARHL1, BARX1, BARX2, BATF, BCL11A, BCL6, BCLAF1, BHLHE40, CASZ1, CDX2, CEBPA, CEBPB, CEPD, CEPG, CLOCK, CREB1, CREBL2, CTCF, CTCFL, CUX1, DBP, DLX1, E2F1, E2F2, E2F3, E2F4, E2F6, E2F7, E2F8, EBF1, EGR1, EGR2, EHF, ELF1, ELF2, ELF3, ELK1, ELK3, ELK4, EOMES, ERF, ERG, ESR1, ESR2, ESRRA, ETS1, ETS2, ETV1, ETV4, ETV5, ETV7, FEV, FOS, FOSL1, FOSL2, FOXA1, FOXA2, FOXD2, FOXG1, FOXH1, FOXM1, FOXO3, FOXP1, FOXP2, FOXP3, GABPA, GATA1, GATA2, GATA3, GATA4, GATA6, GLI2, GLI3, GLIS1, GMEB1, GMEB2, HAND1, HBP1, HES1, HES4, HEY1, HIF1A, HINFP, HMGN3, HNF4A, |

Transcription factors that target subcore genes (continued)

HNF4G, HOXA1, HOXA10, HOXA13, HOXA2, HOXA5, HOXA6, HOXA7, HOXB13, HOXC13, HOXC6, HOXC9, HSF1, HSF2, ID1, ID2, IKZF1, IRF1, IRF2, IRF3, IRF4, IRF5, JUN, JUNB, JUND, KDM5A, KDM5B, KLF1, KLF3, KLF4, KLF5, KLF9, LEF1, LHX2, LHX4, LYL1, MAF, MAFB, MAFF, MAFK, MAX, MAZ, MBD3, MBD4, MECOM, MEF2A, MEF2C, MITF, MNT, MTA3, MXD1, MXI1, MYB, MYBL1, MYBL2, MYC, MYOD1, MZF1, NANOG, NCOR1, NCOR2, NFAT5, NFATC1, NFE2, NFE2L2, NFIC, NFYA, NFYB, NKX2-1, NKX2-2, NKX2-5, NR1D1, NR2C2, NR2F1, NR2F2, NR3C1, NR5A1, NR5A2, NRF1, OTX2, OVOL2, PATZ1, PAX5, PAX6, PBX1, PBX2, PBX3, PGR, POU2F2, POU5F1, PPARG, PRDM1, PROX1, RARG, RCOR1, RELA, REST, RFX1, RFX2, RFX5, RUNX1, RUNX3, RXRA, SALL4, SETDB1, SIX5, SMAD1, SMAD2, SMAD3, SMAD4, SMARCC1, SMARCC2, SNAI2, SOX17, SOX2, SOX4, SOX9, SP1, SP2, SP3, SP4, SPDEF, SPI1, SPIB, SREBF1, SRF, STAT1, STAT2, STAT3, STAT4, STAT5A, T, TAL1, TBP, TCF12, TCF21, TCF3, TCF4, TCF7L2, TEAD1, TEAD2, TEAD4, TFAM, TFAP2A, TFAP2C, TFAP4,

|                                                                    |                                                                                                                                                                                                                                                                                                                                                                                                                                                                                                                                                                                                                                                                                                                                                                                         |
|--------------------------------------------------------------------|-----------------------------------------------------------------------------------------------------------------------------------------------------------------------------------------------------------------------------------------------------------------------------------------------------------------------------------------------------------------------------------------------------------------------------------------------------------------------------------------------------------------------------------------------------------------------------------------------------------------------------------------------------------------------------------------------------------------------------------------------------------------------------------------|
| <p>Transcription factors that target subcore genes (continued)</p> | <p>TFDP1, TFE3, TFEB, THAP1, THAP11, TP53, TP63, TP73, UBTF, USF1, USF2, VDR, VEZF1, WHSC1, WIZ, XBP1, YY1, ZBED4, ZBTB4, ZBTB7A, ZEB1, ZFH3, ZFP42, ZFX, ZKSCAN1, ZMIZ1, ZNF143, ZNF217, ZNF250, ZNF263, ZNF384, ZNF407, ZNF552, ZNF83</p>                                                                                                                                                                                                                                                                                                                                                                                                                                                                                                                                             |
| <p>miRNAs that target subcore genes</p>                            | <p>hsa-let-7a-5p, hsa-let-7b-5p, hsa-let-7c-5p, hsa-let-7e-5p, hsa-let-7i-5p, hsa-miR-100-5p, hsa-miR-101-3p, hsa-miR-106a-3p, hsa-miR-106a-5p, hsa-miR-106b-3p, hsa-miR-106b-5p, hsa-miR-107, hsa-miR-10b-5p, hsa-miR-1178-3p, hsa-miR-1181, hsa-miR-1207-5p, hsa-miR-122-5p, hsa-miR-1233-5p, hsa-miR-1234-3p, hsa-miR-124-3p, hsa-miR-1249-5p, hsa-miR-125a-5p, hsa-miR-125b-5p, hsa-miR-1264, hsa-miR-1273f, hsa-miR-128-3p, hsa-miR-1285-3p, hsa-miR-1288-5p, hsa-miR-1296-3p, hsa-miR-130a-3p, hsa-miR-130b-3p, hsa-miR-1322, hsa-miR-132-3p, hsa-miR-137, hsa-miR-138-2-3p, hsa-miR-138-5p, hsa-miR-139-5p, hsa-miR-1-3p, hsa-miR-142-3p, hsa-miR-143-3p, hsa-miR-144-3p, hsa-miR-145-5p, hsa-miR-1468-3p, hsa-miR-146a-5p, hsa-miR-146b-5p, hsa-miR-149-3p, hsa-miR-149-5p,</p> |

miRNAs that target subcore genes (continued)

hsa-miR-150-5p, hsa-miR-151a-3p, hsa-miR-153-5p, hsa-miR-155-5p, hsa-miR-15a-5p, hsa-miR-15b-5p, hsa-miR-16-5p, hsa-miR-17-5p, hsa-miR-181a-5p, hsa-miR-181c-5p, hsa-miR-185-5p, hsa-miR-187-3p, hsa-miR-18a-3p, hsa-miR-18a-5p, hsa-miR-18b-5p, hsa-miR-1908-5p, hsa-miR-1909-3p, hsa-miR-1910-3p, hsa-miR-193b-3p, hsa-miR-194-3p, hsa-miR-195-5p, hsa-miR-1972, hsa-miR-199a-3p, hsa-miR-199a-5p, hsa-miR-199b-5p, hsa-miR-19a-3p, hsa-miR-19b-3p, hsa-miR-200a-3p, hsa-miR-203a-3p, hsa-miR-20a-5p, hsa-miR-20b-5p, hsa-miR-210-3p, hsa-miR-2110, hsa-miR-211-5p, hsa-miR-214-3p, hsa-miR-21-5p, hsa-miR-217, hsa-miR-221-3p, hsa-miR-222-3p, hsa-miR-223-3p, hsa-miR-22-3p, hsa-miR-24-3p, hsa-miR-25-3p, hsa-miR-2682-5p, hsa-miR-26a-5p, hsa-miR-26b-5p, hsa-miR-27a-3p, hsa-miR-296-3p, hsa-miR-299-5p, hsa-miR-29b-3p, hsa-miR-3065-5p, hsa-miR-3074-3p, hsa-miR-30a-5p, hsa-miR-30b-5p, hsa-miR-30c-5p, hsa-miR-30d-5p, hsa-miR-30e-5p, hsa-miR-3121-3p, hsa-miR-3128, hsa-miR-31-5p, hsa-miR-3160-3p, hsa-miR-3165, hsa-miR-3199, hsa-miR-320a, hsa-miR-324-3p, hsa-miR-324-5p, hsa-miR-329-5p, hsa-

miRNAs that target subcore genes (continued)

miR-335-5p, hsa-miR-337-3p, hsa-miR-33a-5p, hsa-miR-34a-5p, hsa-miR-34b-5p, hsa-miR-3529-3p, hsa-miR-3609, hsa-miR-3658, hsa-miR-365a-3p, hsa-miR-365a-5p, hsa-miR-365b-5p, hsa-miR-3662, hsa-miR-3668, hsa-miR-371b-3p, hsa-miR-375, hsa-miR-379-3p, hsa-miR-380-5p, hsa-miR-3934-5p, hsa-miR-424-5p, hsa-miR-4270, hsa-miR-4271, hsa-miR-4279, hsa-miR-4282, hsa-miR-4286, hsa-miR-4290, hsa-miR-4306, hsa-miR-4418, hsa-miR-4419a, hsa-miR-4434, hsa-miR-4438, hsa-miR-4441, hsa-miR-4463, hsa-miR-4464, hsa-miR-4470, hsa-miR-4487, hsa-miR-4499, hsa-miR-449c-5p, hsa-miR-4510, hsa-miR-4516, hsa-miR-452-5p, hsa-miR-4531, hsa-miR-454-3p, hsa-miR-4644, hsa-miR-4650-5p, hsa-miR-4651, hsa-miR-4659a-3p, hsa-miR-4659b-3p, hsa-miR-4662a-5p, hsa-miR-4682, hsa-miR-4684-5p, hsa-miR-4685-5p, hsa-miR-4694-3p, hsa-miR-4697-3p, hsa-miR-4698, hsa-miR-4720-3p, hsa-miR-4725-3p, hsa-miR-4728-5p, hsa-miR-4735-3p, hsa-miR-4736, hsa-miR-4738-3p, hsa-miR-4742-3p, hsa-miR-4748, hsa-miR-4763-3p, hsa-miR-4768-5p, hsa-miR-4778-3p, hsa-miR-4795-5p, hsa-miR-4799-5p, hsa-miR-4804-3p, hsa-

miRNAs that target subcore genes (continued)

miR-484, hsa-miR-485-5p, hsa-miR-491-5p, hsa-miR-494-3p, hsa-miR-5003-5p, hsa-miR-500b-3p, hsa-miR-504-5p, hsa-miR-5089-3p, hsa-miR-509-3-5p, hsa-miR-5094, hsa-miR-5095, hsa-miR-509-5p, hsa-miR-513b-3p, hsa-miR-5193, hsa-miR-5196-3p, hsa-miR-5197-5p, hsa-miR-519c-3p, hsa-miR-519d-3p, hsa-miR-526b-5p, hsa-miR-548ah-5p, hsa-miR-548g-3p, hsa-miR-548n, hsa-miR-558, hsa-miR-5581-3p, hsa-miR-5681a, hsa-miR-5681b, hsa-miR-5692a, hsa-miR-5693, hsa-miR-5702, hsa-miR-5703, hsa-miR-576-3p, hsa-miR-589-3p, hsa-miR-589-5p, hsa-miR-605-5p, hsa-miR-6077, hsa-miR-608, hsa-miR-612, hsa-miR-6127, hsa-miR-6129, hsa-miR-6130, hsa-miR-6133, hsa-miR-618, hsa-miR-622, hsa-miR-625-3p, hsa-miR-630, hsa-miR-633, hsa-miR-6511a-5p, hsa-miR-652-3p, hsa-miR-660-3p, hsa-miR-663a, hsa-miR-6722-3p, hsa-miR-6731-5p, hsa-miR-6749-3p, hsa-miR-6751-5p, hsa-miR-6752-5p, hsa-miR-6754-5p, hsa-miR-6755-5p, hsa-miR-6756-5p, hsa-miR-6760-5p, hsa-miR-6762-3p, hsa-miR-6766-5p, hsa-miR-6778-5p, hsa-miR-6780b-5p, hsa-miR-6785-5p, hsa-miR-6789-3p, hsa-miR-6797-5p, hsa-miR-6803-5p, hsa-miR-

miRNAs that target subcore genes (continued)

6806-5p, hsa-miR-6807-3p, hsa-miR-6807-5p, hsa-miR-6808-5p, hsa-miR-6809-3p, hsa-miR-6815-3p, hsa-miR-6825-5p, hsa-miR-6833-3p, hsa-miR-6835-5p, hsa-miR-6837-5p, hsa-miR-6842-5p, hsa-miR-6845-3p, hsa-miR-6871-3p, hsa-miR-6872-3p, hsa-miR-6875-3p, hsa-miR-6878-5p, hsa-miR-6880-5p, hsa-miR-6882-5p, hsa-miR-6883-5p, hsa-miR-6893-5p, hsa-miR-7110-3p, hsa-miR-7110-5p, hsa-miR-7113-5p, hsa-miR-7150, hsa-miR-7151-3p, hsa-miR-7158-5p, hsa-miR-744-5p, hsa-miR-7-5p, hsa-miR-8052, hsa-miR-8055, hsa-miR-8071, hsa-miR-8085, hsa-miR-874-3p, hsa-miR-877-3p, hsa-miR-889-3p, hsa-miR-922, hsa-miR-92a-1-5p, hsa-miR-92a-2-5p, hsa-miR-92a-3p, hsa-miR-92b-3p, hsa-miR-935, hsa-miR-93-5p, hsa-miR-937-5p, hsa-miR-940, hsa-miR-942-5p, hsa-miR-9-5p, hsa-miR-98-5p, hsa-miR-99a-5p



**Supplemental Table 5: Transcription factors and miRNAs****subcore genes co-regulatory network.** This table shows

transcription factors, miRNAs and subcore genes relationship.

Transcription factors or miRNAs in Source column regulate

genes or miRNAs in Target column.

| <b>Source</b> | <b>Target</b>   |
|---------------|-----------------|
| ADNP          | SMAD3           |
| ADNP          | hsa-miR-6815-3p |
| ADNP          | hsa-miR-6789-3p |
| ADNP          | hsa-miR-5702    |
| ADNP          | hsa-miR-484     |
| ADNP          | hsa-miR-1181    |
| AEBP2         | TGFB1           |
| AEBP2         | hsa-miR-6875-3p |
| AFF1          | HIF1A           |
| AFF1          | NFKB1           |
| AFF1          | hsa-miR-4736    |
| AFF1          | hsa-miR-199a-5p |
| AFF1          | hsa-miR-199a-3p |
| AFF1          | hsa-miR-142-3p  |
| AHR           | IL6             |
| AHR           | hsa-miR-146a-5p |
| AHR           | hsa-miR-21-5p   |
| AR            | IL6             |
| AR            | STAT3           |
| AR            | TP53            |
| AR            | TLR4            |
| AR            | HIF1A           |
| AR            | IL10            |
| AR            | NFKB1           |
| AR            | SMAD3           |
| AR            | TGFB1           |
| AR            | hsa-let-7i-5p   |
| AR            | hsa-miR-1-3p    |
| AR            | hsa-miR-101-3p  |
| AR            | hsa-miR-137     |
| AR            | hsa-miR-2110    |

|    |                  |
|----|------------------|
| AR | hsa-miR-30b-5p   |
| AR | hsa-miR-30d-5p   |
| AR | hsa-miR-491-5p   |
| AR | hsa-miR-622      |
| AR | hsa-miR-9-5p     |
| AR | hsa-miR-937-5p   |
| AR | hsa-miR-93-5p    |
| AR | hsa-miR-92b-3p   |
| AR | hsa-miR-92a-3p   |
| AR | hsa-miR-92a-2-5p |
| AR | hsa-miR-92a-1-5p |
| AR | hsa-miR-877-3p   |
| AR | hsa-miR-8085     |
| AR | hsa-miR-8071     |
| AR | hsa-miR-8055     |
| AR | hsa-miR-7158-5p  |
| AR | hsa-miR-7150     |
| AR | hsa-miR-7110-5p  |
| AR | hsa-miR-7110-3p  |
| AR | hsa-miR-7-5p     |
| AR | hsa-miR-6893-5p  |
| AR | hsa-miR-6882-5p  |
| AR | hsa-miR-6880-5p  |
| AR | hsa-miR-6875-3p  |
| AR | hsa-miR-6871-3p  |
| AR | hsa-miR-6845-3p  |
| AR | hsa-miR-6837-5p  |
| AR | hsa-miR-6835-5p  |
| AR | hsa-miR-6825-5p  |
| AR | hsa-miR-6815-3p  |
| AR | hsa-miR-6809-3p  |
| AR | hsa-miR-6808-5p  |
| AR | hsa-miR-6803-5p  |
| AR | hsa-miR-6797-5p  |
| AR | hsa-miR-6789-3p  |
| AR | hsa-miR-6785-5p  |
| AR | hsa-miR-6780b-5p |
| AR | hsa-miR-6766-5p  |
| AR | hsa-miR-6760-5p  |
| AR | hsa-miR-6756-5p  |

|    |                  |
|----|------------------|
| AR | hsa-miR-6755-5p  |
| AR | hsa-miR-6754-5p  |
| AR | hsa-miR-6752-5p  |
| AR | hsa-miR-6751-5p  |
| AR | hsa-miR-6749-3p  |
| AR | hsa-miR-6722-3p  |
| AR | hsa-miR-663a     |
| AR | hsa-miR-6511a-5p |
| AR | hsa-miR-633      |
| AR | hsa-miR-6127     |
| AR | hsa-miR-612      |
| AR | hsa-miR-589-5p   |
| AR | hsa-miR-589-3p   |
| AR | hsa-miR-5703     |
| AR | hsa-miR-5702     |
| AR | hsa-miR-5692a    |
| AR | hsa-miR-5681b    |
| AR | hsa-miR-5681a    |
| AR | hsa-miR-548n     |
| AR | hsa-miR-5197-5p  |
| AR | hsa-miR-5196-3p  |
| AR | hsa-miR-5193     |
| AR | hsa-miR-5089-3p  |
| AR | hsa-miR-504-5p   |
| AR | hsa-miR-494-3p   |
| AR | hsa-miR-485-5p   |
| AR | hsa-miR-484      |
| AR | hsa-miR-4804-3p  |
| AR | hsa-miR-4799-5p  |
| AR | hsa-miR-4795-5p  |
| AR | hsa-miR-4763-3p  |
| AR | hsa-miR-4742-3p  |
| AR | hsa-miR-4738-3p  |
| AR | hsa-miR-4728-5p  |
| AR | hsa-miR-4725-3p  |
| AR | hsa-miR-4720-3p  |
| AR | hsa-miR-4697-3p  |
| AR | hsa-miR-4685-5p  |
| AR | hsa-miR-4651     |
| AR | hsa-miR-4499     |

|    |                 |
|----|-----------------|
| AR | hsa-miR-4470    |
| AR | hsa-miR-4434    |
| AR | hsa-miR-4290    |
| AR | hsa-miR-4282    |
| AR | hsa-miR-4279    |
| AR | hsa-miR-3934-5p |
| AR | hsa-miR-375     |
| AR | hsa-miR-371b-3p |
| AR | hsa-miR-3662    |
| AR | hsa-miR-365b-5p |
| AR | hsa-miR-365a-5p |
| AR | hsa-miR-365a-3p |
| AR | hsa-miR-3658    |
| AR | hsa-miR-34a-5p  |
| AR | hsa-miR-337-3p  |
| AR | hsa-miR-324-5p  |
| AR | hsa-miR-324-3p  |
| AR | hsa-miR-320a    |
| AR | hsa-miR-3199    |
| AR | hsa-miR-3165    |
| AR | hsa-miR-30c-5p  |
| AR | hsa-miR-30a-5p  |
| AR | hsa-miR-3074-3p |
| AR | hsa-miR-3065-5p |
| AR | hsa-miR-299-5p  |
| AR | hsa-miR-296-3p  |
| AR | hsa-miR-27a-3p  |
| AR | hsa-miR-26b-5p  |
| AR | hsa-miR-26a-5p  |
| AR | hsa-miR-2682-5p |
| AR | hsa-miR-25-3p   |
| AR | hsa-miR-24-3p   |
| AR | hsa-miR-22-3p   |
| AR | hsa-miR-211-5p  |
| AR | hsa-miR-210-3p  |
| AR | hsa-miR-21-5p   |
| AR | hsa-miR-20b-5p  |
| AR | hsa-miR-20a-5p  |
| AR | hsa-miR-203a-3p |
| AR | hsa-miR-19b-3p  |

|        |                 |
|--------|-----------------|
| AR     | hsa-miR-19a-3p  |
| AR     | hsa-miR-199b-5p |
| AR     | hsa-miR-199a-5p |
| AR     | hsa-miR-199a-3p |
| AR     | hsa-miR-193b-3p |
| AR     | hsa-miR-1909-3p |
| AR     | hsa-miR-1908-5p |
| AR     | hsa-miR-18b-5p  |
| AR     | hsa-miR-18a-5p  |
| AR     | hsa-miR-18a-3p  |
| AR     | hsa-miR-17-5p   |
| AR     | hsa-miR-16-5p   |
| AR     | hsa-miR-15b-5p  |
| AR     | hsa-miR-155-5p  |
| AR     | hsa-miR-153-5p  |
| AR     | hsa-miR-150-5p  |
| AR     | hsa-miR-149-5p  |
| AR     | hsa-miR-149-3p  |
| AR     | hsa-miR-146b-5p |
| AR     | hsa-miR-143-3p  |
| AR     | hsa-miR-142-3p  |
| AR     | hsa-miR-138-5p  |
| AR     | hsa-miR-130b-3p |
| AR     | hsa-miR-1273f   |
| AR     | hsa-miR-1249-5p |
| AR     | hsa-miR-124-3p  |
| AR     | hsa-miR-1234-3p |
| AR     | hsa-miR-1207-5p |
| AR     | hsa-miR-106b-5p |
| AR     | hsa-miR-106b-3p |
| AR     | hsa-miR-106a-5p |
| AR     | hsa-miR-106a-3p |
| AR     | hsa-miR-100-5p  |
| AR     | hsa-let-7b-5p   |
| AR     | hsa-let-7a-5p   |
| ARID3A | HIF1A           |
| ARID3A | IL6             |
| ARID3A | NFKB1           |
| ARID3A | SMAD3           |
| ARID3A | STAT3           |

|        |                  |
|--------|------------------|
| ARID3A | TGFB1            |
| ARID3A | TP53             |
| ARID3A | hsa-miR-17-5p    |
| ARID3A | hsa-miR-21-5p    |
| ARID3A | hsa-miR-320a     |
| ARID3A | hsa-miR-92a-3p   |
| ARID3A | hsa-miR-92a-1-5p |
| ARID3A | hsa-miR-618      |
| ARID3A | hsa-miR-424-5p   |
| ARID3A | hsa-miR-3160-3p  |
| ARID3A | hsa-miR-30b-5p   |
| ARID3A | hsa-miR-223-3p   |
| ARID3A | hsa-miR-20a-5p   |
| ARID3A | hsa-miR-19b-3p   |
| ARID3A | hsa-miR-19a-3p   |
| ARID3A | hsa-miR-199b-5p  |
| ARID3A | hsa-miR-18a-5p   |
| ARID3A | hsa-miR-18a-3p   |
| ARID3A | hsa-miR-16-5p    |
| ARID3A | hsa-miR-15b-5p   |
| ARID3A | hsa-miR-155-5p   |
| ARID3A | hsa-miR-145-5p   |
| ARID3A | hsa-miR-144-3p   |
| ARID3A | hsa-miR-142-3p   |
| ARID3A | hsa-miR-101-3p   |
| ARID3A | hsa-let-7a-5p    |
| ARNT   | HIF1A            |
| ARNT   | IL6              |
| ARNT   | NFKB1            |
| ARNT   | PTGS2            |
| ARNT   | STAT3            |
| ARNT   | TGFB1            |
| ARNT   | TP53             |
| ARNT   | hsa-miR-138-5p   |
| ARNT   | hsa-miR-146a-5p  |
| ARNT   | hsa-miR-21-5p    |
| ARNT   | hsa-miR-24-3p    |
| ARNT   | hsa-miR-937-5p   |
| ARNT   | hsa-miR-935      |
| ARNT   | hsa-miR-92b-3p   |

|       |                 |
|-------|-----------------|
| ARNT  | hsa-miR-7-5p    |
| ARNT  | hsa-miR-6825-5p |
| ARNT  | hsa-miR-6722-3p |
| ARNT  | hsa-miR-608     |
| ARNT  | hsa-miR-5193    |
| ARNT  | hsa-miR-5089-3p |
| ARNT  | hsa-miR-4763-3p |
| ARNT  | hsa-miR-4736    |
| ARNT  | hsa-miR-4698    |
| ARNT  | hsa-miR-4279    |
| ARNT  | hsa-miR-4270    |
| ARNT  | hsa-miR-296-3p  |
| ARNT  | hsa-miR-27a-3p  |
| ARNT  | hsa-miR-203a-3p |
| ARNT  | hsa-miR-149-5p  |
| ARNT  | hsa-miR-149-3p  |
| ARNT  | hsa-miR-132-3p  |
| ARNT  | hsa-miR-1249-5p |
| ARNT  | hsa-miR-124-3p  |
| ARNT  | hsa-let-7b-5p   |
| ARNTL | HIF1A           |
| ASCL1 | NFKB1           |
| ASCL2 | HIF1A           |
| ASCL2 | NFKB1           |
| ASCL2 | PTGS2           |
| ASCL2 | SMAD3           |
| ASCL2 | STAT3           |
| ASCL2 | TGFB1           |
| ASCL2 | TP53            |
| ASCL2 | hsa-miR-6797-5p |
| ASCL2 | hsa-miR-4763-3p |
| ASCL2 | hsa-miR-375     |
| ASCL2 | hsa-miR-210-3p  |
| ASCL2 | hsa-miR-203a-3p |
| ASCL2 | hsa-let-7b-5p   |
| ATF1  | IL6             |
| ATF1  | STAT3           |
| ATF1  | TP53            |
| ATF1  | hsa-miR-155-5p  |
| ATF1  | hsa-miR-1908-5p |

|      |                  |
|------|------------------|
| ATF1 | hsa-miR-4738-3p  |
| ATF1 | hsa-miR-9-5p     |
| ATF1 | hsa-miR-6751-5p  |
| ATF1 | hsa-miR-6731-5p  |
| ATF1 | hsa-miR-5702     |
| ATF1 | hsa-miR-5692a    |
| ATF1 | hsa-miR-4795-5p  |
| ATF1 | hsa-miR-452-5p   |
| ATF1 | hsa-miR-4510     |
| ATF1 | hsa-miR-449c-5p  |
| ATF1 | hsa-miR-4441     |
| ATF1 | hsa-miR-3160-3p  |
| ATF1 | hsa-miR-132-3p   |
| ATF2 | HIF1A            |
| ATF2 | IL17A            |
| ATF2 | IL6              |
| ATF2 | NFKB1            |
| ATF2 | SMAD3            |
| ATF2 | STAT3            |
| ATF2 | TGFB1            |
| ATF2 | TNF              |
| ATF2 | TP53             |
| ATF2 | hsa-miR-1181     |
| ATF2 | hsa-miR-320a     |
| ATF2 | hsa-miR-4470     |
| ATF2 | hsa-miR-4651     |
| ATF2 | hsa-miR-663a     |
| ATF2 | hsa-miR-98-5p    |
| ATF2 | hsa-miR-935      |
| ATF2 | hsa-miR-93-5p    |
| ATF2 | hsa-miR-92a-3p   |
| ATF2 | hsa-miR-92a-1-5p |
| ATF2 | hsa-miR-9-5p     |
| ATF2 | hsa-miR-7-5p     |
| ATF2 | hsa-miR-6871-3p  |
| ATF2 | hsa-miR-6837-5p  |
| ATF2 | hsa-miR-6835-5p  |
| ATF2 | hsa-miR-6825-5p  |
| ATF2 | hsa-miR-6807-5p  |
| ATF2 | hsa-miR-6807-3p  |



|      |                  |
|------|------------------|
| ATF2 | hsa-miR-6760-5p  |
| ATF2 | hsa-miR-6749-3p  |
| ATF2 | hsa-miR-630      |
| ATF2 | hsa-miR-625-3p   |
| ATF2 | hsa-miR-5703     |
| ATF2 | hsa-miR-558      |
| ATF2 | hsa-miR-5193     |
| ATF2 | hsa-miR-4748     |
| ATF2 | hsa-miR-4736     |
| ATF2 | hsa-miR-4720-3p  |
| ATF2 | hsa-miR-4697-3p  |
| ATF2 | hsa-miR-4659b-3p |
| ATF2 | hsa-miR-4659a-3p |
| ATF2 | hsa-miR-4419a    |
| ATF2 | hsa-miR-3662     |
| ATF2 | hsa-miR-365a-5p  |
| ATF2 | hsa-miR-365a-3p  |
| ATF2 | hsa-miR-30e-5p   |
| ATF2 | hsa-miR-27a-3p   |
| ATF2 | hsa-miR-26a-5p   |
| ATF2 | hsa-miR-25-3p    |
| ATF2 | hsa-miR-24-3p    |
| ATF2 | hsa-miR-222-3p   |
| ATF2 | hsa-miR-22-3p    |
| ATF2 | hsa-miR-20a-5p   |
| ATF2 | hsa-miR-19b-3p   |
| ATF2 | hsa-miR-19a-3p   |
| ATF2 | hsa-miR-18a-5p   |
| ATF2 | hsa-miR-18a-3p   |
| ATF2 | hsa-miR-17-5p    |
| ATF2 | hsa-miR-151a-3p  |
| ATF2 | hsa-miR-146a-5p  |
| ATF2 | hsa-miR-130a-3p  |
| ATF2 | hsa-miR-128-3p   |
| ATF2 | hsa-miR-124-3p   |
| ATF2 | hsa-miR-106b-5p  |
| ATF2 | hsa-miR-106b-3p  |
| ATF3 | HIF1A            |
| ATF3 | TP53             |
| ATF3 | IL6              |

|       |                 |
|-------|-----------------|
| ATF3  | PTGS2           |
| ATF3  | STAT3           |
| ATF3  | TGFB1           |
| ATF3  | hsa-let-7i-5p   |
| ATF3  | hsa-miR-128-3p  |
| ATF3  | hsa-miR-132-3p  |
| ATF3  | hsa-miR-142-3p  |
| ATF3  | hsa-miR-150-5p  |
| ATF3  | hsa-miR-155-5p  |
| ATF3  | hsa-miR-21-5p   |
| ATF3  | hsa-miR-320a    |
| ATF3  | hsa-miR-4470    |
| ATF3  | hsa-miR-4651    |
| ATF3  | hsa-miR-4738-3p |
| ATF3  | hsa-miR-484     |
| ATF3  | hsa-miR-663a    |
| ATF3  | hsa-miR-942-5p  |
| ATF3  | hsa-miR-6833-3p |
| ATF3  | hsa-miR-6760-5p |
| ATF3  | hsa-miR-4531    |
| ATF3  | hsa-miR-30b-5p  |
| ATF3  | hsa-miR-193b-3p |
| ATF3  | hsa-miR-1207-5p |
| ATF5  | PTGS2           |
| ATF5  | SMAD3           |
| ATF5  | TP53            |
| ATF5  | hsa-miR-9-5p    |
| ATF5  | hsa-miR-7-5p    |
| ATF5  | hsa-miR-29b-3p  |
| ATF5  | hsa-miR-20a-5p  |
| ATF5  | hsa-miR-19a-3p  |
| ATF5  | hsa-miR-18a-5p  |
| ATF5  | hsa-miR-18a-3p  |
| ATF5  | hsa-miR-181a-5p |
| ATF5  | hsa-miR-17-5p   |
| ATOH1 | HIF1A           |
| ATOH1 | IL6             |
| ATOH1 | NFKB1           |
| ATOH1 | PTGS2           |
| ATOH1 | STAT3           |

|       |                 |
|-------|-----------------|
| ATOH1 | TGFB1           |
| ATOH1 | TP53            |
| ATOH1 | hsa-miR-93-5p   |
| ATOH1 | hsa-miR-4763-3p |
| ATOH1 | hsa-miR-375     |
| ATOH1 | hsa-miR-25-3p   |
| ATOH1 | hsa-miR-145-5p  |
| ATOH1 | hsa-miR-106b-5p |
| ATOH1 | hsa-miR-106b-3p |
| ATOH1 | hsa-let-7b-5p   |
| BACH1 | HIF1A           |
| BACH1 | IL6             |
| BACH1 | NFKB1           |
| BACH1 | PTGS2           |
| BACH1 | SMAD3           |
| BACH1 | STAT3           |
| BACH1 | TGFB1           |
| BACH1 | TP53            |
| BACH1 | hsa-miR-124-3p  |
| BACH1 | hsa-miR-132-3p  |
| BACH1 | hsa-miR-17-5p   |
| BACH1 | hsa-miR-1908-5p |
| BACH1 | hsa-miR-22-3p   |
| BACH1 | hsa-miR-320a    |
| BACH1 | hsa-miR-935     |
| BACH1 | hsa-miR-93-5p   |
| BACH1 | hsa-miR-9-5p    |
| BACH1 | hsa-miR-8085    |
| BACH1 | hsa-miR-6875-3p |
| BACH1 | hsa-miR-6835-5p |
| BACH1 | hsa-miR-6815-3p |
| BACH1 | hsa-miR-6755-5p |
| BACH1 | hsa-miR-622     |
| BACH1 | hsa-miR-504-5p  |
| BACH1 | hsa-miR-365a-5p |
| BACH1 | hsa-miR-365a-3p |
| BACH1 | hsa-miR-2682-5p |
| BACH1 | hsa-miR-25-3p   |
| BACH1 | hsa-miR-199b-5p |
| BACH1 | hsa-miR-150-5p  |

|        |                 |
|--------|-----------------|
| BACH1  | hsa-miR-149-5p  |
| BACH1  | hsa-miR-149-3p  |
| BACH1  | hsa-miR-1468-3p |
| BACH1  | hsa-miR-137     |
| BACH1  | hsa-miR-106b-5p |
| BACH1  | hsa-miR-106b-3p |
| BACH2  | STAT3           |
| BACH2  | TLR4            |
| BACH2  | TP53            |
| BACH2  | hsa-miR-922     |
| BACH2  | hsa-miR-6797-5p |
| BACH2  | hsa-miR-5193    |
| BACH2  | hsa-miR-4736    |
| BACH2  | hsa-miR-365a-5p |
| BACH2  | hsa-miR-365a-3p |
| BACH2  | hsa-miR-3165    |
| BARHL1 | HIF1A           |
| BARHL1 | PTGS2           |
| BARHL1 | SMAD3           |
| BARHL1 | TP53            |
| BARHL1 | hsa-miR-6825-5p |
| BARHL1 | hsa-miR-6789-3p |
| BARHL1 | hsa-miR-6778-5p |
| BARHL1 | hsa-miR-5692a   |
| BARHL1 | hsa-miR-4795-5p |
| BARHL1 | hsa-miR-375     |
| BARHL1 | hsa-miR-203a-3p |
| BARHL1 | hsa-miR-1273f   |
| BARX1  | SMAD3           |
| BARX1  | hsa-miR-449c-5p |
| BARX2  | STAT3           |
| BATF   | IL17A           |
| BATF   | IL6             |
| BATF   | NFKB1           |
| BATF   | STAT3           |
| BATF   | TNF             |
| BATF   | hsa-miR-1207-5p |
| BATF   | hsa-miR-128-3p  |
| BATF   | hsa-miR-155-5p  |
| BATF   | hsa-miR-21-5p   |

|        |                  |
|--------|------------------|
| BATF   | hsa-miR-3662     |
| BATF   | hsa-miR-4270     |
| BATF   | hsa-miR-4434     |
| BATF   | hsa-miR-4697-3p  |
| BATF   | hsa-miR-625-3p   |
| BATF   | hsa-miR-4799-5p  |
| BATF   | hsa-miR-4659a-3p |
| BATF   | hsa-miR-30e-5p   |
| BATF   | hsa-miR-138-5p   |
| BATF   | hsa-miR-138-2-3p |
| BATF   | hsa-miR-124-3p   |
| BCL11A | NFKB1            |
| BCL11A | STAT3            |
| BCL11A | TNF              |
| BCL11A | hsa-let-7i-5p    |
| BCL11A | hsa-miR-1207-5p  |
| BCL11A | hsa-miR-128-3p   |
| BCL11A | hsa-miR-130a-3p  |
| BCL11A | hsa-miR-142-3p   |
| BCL11A | hsa-miR-146a-5p  |
| BCL11A | hsa-miR-21-5p    |
| BCL11A | hsa-miR-3529-3p  |
| BCL11A | hsa-miR-365a-3p  |
| BCL11A | hsa-miR-365a-5p  |
| BCL11A | hsa-miR-3662     |
| BCL11A | hsa-miR-4516     |
| BCL11A | hsa-miR-4659a-3p |
| BCL11A | hsa-miR-4659b-3p |
| BCL11A | hsa-miR-4736     |
| BCL11A | hsa-miR-663a     |
| BCL11A | hsa-miR-7-5p     |
| BCL6   | HIF1A            |
| BCL6   | IL10             |
| BCL6   | IL6              |
| BCL6   | NFKB1            |
| BCL6   | SMAD3            |
| BCL6   | STAT3            |
| BCL6   | TGFB1            |
| BCL6   | TLR4             |
| BCL6   | TNF              |

|        |                 |
|--------|-----------------|
| BCL6   | TP53            |
| BCL6   | hsa-miR-1178-3p |
| BCL6   | hsa-miR-1207-5p |
| BCL6   | hsa-miR-124-3p  |
| BCL6   | hsa-miR-1322    |
| BCL6   | hsa-miR-181c-5p |
| BCL6   | hsa-miR-199b-5p |
| BCL6   | hsa-miR-30b-5p  |
| BCL6   | hsa-miR-548g-3p |
| BCL6   | hsa-miR-589-3p  |
| BCL6   | hsa-miR-589-5p  |
| BCL6   | hsa-miR-612     |
| BCL6   | hsa-miR-630     |
| BCL6   | hsa-miR-92b-3p  |
| BCL6   | hsa-miR-922     |
| BCL6   | hsa-miR-9-5p    |
| BCL6   | hsa-miR-6882-5p |
| BCL6   | hsa-miR-6875-3p |
| BCL6   | hsa-miR-6845-3p |
| BCL6   | hsa-miR-6825-5p |
| BCL6   | hsa-miR-6815-3p |
| BCL6   | hsa-miR-6809-3p |
| BCL6   | hsa-miR-6751-5p |
| BCL6   | hsa-miR-4799-5p |
| BCL6   | hsa-miR-4795-5p |
| BCL6   | hsa-miR-4736    |
| BCL6   | hsa-miR-4531    |
| BCL6   | hsa-miR-449c-5p |
| BCL6   | hsa-miR-4487    |
| BCL6   | hsa-miR-4464    |
| BCL6   | hsa-miR-365a-5p |
| BCL6   | hsa-miR-365a-3p |
| BCL6   | hsa-miR-34b-5p  |
| BCL6   | hsa-miR-3165    |
| BCL6   | hsa-miR-2110    |
| BCL6   | hsa-miR-193b-3p |
| BCL6   | hsa-miR-145-5p  |
| BCL6   | hsa-miR-139-5p  |
| BCL6   | hsa-miR-138-5p  |
| BCLAF1 | HIF1A           |

|         |                  |
|---------|------------------|
| BCLAF1  | IL6              |
| BCLAF1  | NFKB1            |
| BCLAF1  | STAT3            |
| BCLAF1  | TGFB1            |
| BCLAF1  | TNF              |
| BCLAF1  | TP53             |
| BCLAF1  | hsa-miR-142-3p   |
| BCLAF1  | hsa-miR-21-5p    |
| BCLAF1  | hsa-miR-663a     |
| BCLAF1  | hsa-miR-92a-3p   |
| BCLAF1  | hsa-miR-92a-1-5p |
| BCLAF1  | hsa-miR-625-3p   |
| BCLAF1  | hsa-miR-20a-5p   |
| BCLAF1  | hsa-miR-19b-3p   |
| BCLAF1  | hsa-miR-19a-3p   |
| BCLAF1  | hsa-miR-18a-5p   |
| BCLAF1  | hsa-miR-18a-3p   |
| BCLAF1  | hsa-miR-146a-5p  |
| BCLAF1  | hsa-miR-128-3p   |
| BCLAF1  | hsa-miR-124-3p   |
| BHLHE40 | HIF1A            |
| BHLHE40 | IL17A            |
| BHLHE40 | IL6              |
| BHLHE40 | NFKB1            |
| BHLHE40 | SMAD3            |
| BHLHE40 | STAT3            |
| BHLHE40 | TGFB1            |
| BHLHE40 | TLR4             |
| BHLHE40 | TNF              |
| BHLHE40 | TP53             |
| BHLHE40 | hsa-let-7i-5p    |
| BHLHE40 | hsa-miR-1181     |
| BHLHE40 | hsa-miR-1322     |
| BHLHE40 | hsa-miR-210-3p   |
| BHLHE40 | hsa-miR-22-3p    |
| BHLHE40 | hsa-miR-3662     |
| BHLHE40 | hsa-miR-4470     |
| BHLHE40 | hsa-miR-4651     |
| BHLHE40 | hsa-miR-4738-3p  |
| BHLHE40 | hsa-miR-484      |

|         |                 |
|---------|-----------------|
| BHLHE40 | hsa-miR-942-5p  |
| BHLHE40 | hsa-miR-92b-3p  |
| BHLHE40 | hsa-miR-7110-5p |
| BHLHE40 | hsa-miR-7110-3p |
| BHLHE40 | hsa-miR-7-5p    |
| BHLHE40 | hsa-miR-6835-5p |
| BHLHE40 | hsa-miR-6815-3p |
| BHLHE40 | hsa-miR-6809-3p |
| BHLHE40 | hsa-miR-6760-5p |
| BHLHE40 | hsa-miR-5193    |
| BHLHE40 | hsa-miR-504-5p  |
| BHLHE40 | hsa-miR-380-5p  |
| BHLHE40 | hsa-miR-329-5p  |
| BHLHE40 | hsa-miR-3128    |
| BHLHE40 | hsa-miR-30e-5p  |
| BHLHE40 | hsa-miR-30b-5p  |
| BHLHE40 | hsa-miR-223-3p  |
| BHLHE40 | hsa-miR-195-5p  |
| BHLHE40 | hsa-miR-193b-3p |
| BHLHE40 | hsa-miR-17-5p   |
| BHLHE40 | hsa-miR-155-5p  |
| BHLHE40 | hsa-miR-142-3p  |
| BHLHE40 | hsa-miR-139-5p  |
| BHLHE40 | hsa-miR-138-5p  |
| BHLHE40 | hsa-miR-130a-3p |
| BHLHE40 | hsa-miR-1273f   |
| BHLHE40 | hsa-miR-124-3p  |
| BHLHE40 | hsa-miR-1207-5p |
| BHLHE40 | hsa-miR-101-3p  |
| CASZ1   | STAT3           |
| CDX2    | HIF1A           |
| CDX2    | NFKB1           |
| CDX2    | PTGS2           |
| CDX2    | SMAD3           |
| CDX2    | STAT3           |
| CDX2    | TGFB1           |
| CDX2    | TLR4            |
| CDX2    | TP53            |
| CDX2    | hsa-miR-940     |
| CDX2    | hsa-miR-93-5p   |



|      |                  |
|------|------------------|
| CDX2 | hsa-miR-9-5p     |
| CDX2 | hsa-miR-874-3p   |
| CDX2 | hsa-miR-8085     |
| CDX2 | hsa-miR-744-5p   |
| CDX2 | hsa-miR-7150     |
| CDX2 | hsa-miR-6893-5p  |
| CDX2 | hsa-miR-6845-3p  |
| CDX2 | hsa-miR-6837-5p  |
| CDX2 | hsa-miR-6785-5p  |
| CDX2 | hsa-miR-6778-5p  |
| CDX2 | hsa-miR-6756-5p  |
| CDX2 | hsa-miR-6752-5p  |
| CDX2 | hsa-miR-589-5p   |
| CDX2 | hsa-miR-589-3p   |
| CDX2 | hsa-miR-5581-3p  |
| CDX2 | hsa-miR-558      |
| CDX2 | hsa-miR-548ah-5p |
| CDX2 | hsa-miR-526b-5p  |
| CDX2 | hsa-miR-5197-5p  |
| CDX2 | hsa-miR-494-3p   |
| CDX2 | hsa-miR-485-5p   |
| CDX2 | hsa-miR-4799-5p  |
| CDX2 | hsa-miR-4763-3p  |
| CDX2 | hsa-miR-4735-3p  |
| CDX2 | hsa-miR-4728-5p  |
| CDX2 | hsa-miR-4720-3p  |
| CDX2 | hsa-miR-4698     |
| CDX2 | hsa-miR-4684-5p  |
| CDX2 | hsa-miR-4682     |
| CDX2 | hsa-miR-4659b-3p |
| CDX2 | hsa-miR-4659a-3p |
| CDX2 | hsa-miR-4644     |
| CDX2 | hsa-miR-4438     |
| CDX2 | hsa-miR-4434     |
| CDX2 | hsa-miR-4290     |
| CDX2 | hsa-miR-4279     |
| CDX2 | hsa-miR-4271     |
| CDX2 | hsa-miR-3934-5p  |
| CDX2 | hsa-miR-379-3p   |
| CDX2 | hsa-miR-371b-3p  |

|       |                  |
|-------|------------------|
| CDX2  | hsa-miR-3658     |
| CDX2  | hsa-miR-33a-5p   |
| CDX2  | hsa-miR-3160-3p  |
| CDX2  | hsa-miR-30d-5p   |
| CDX2  | hsa-miR-30c-5p   |
| CDX2  | hsa-miR-3065-5p  |
| CDX2  | hsa-miR-29b-3p   |
| CDX2  | hsa-miR-299-5p   |
| CDX2  | hsa-miR-27a-3p   |
| CDX2  | hsa-miR-25-3p    |
| CDX2  | hsa-miR-24-3p    |
| CDX2  | hsa-miR-222-3p   |
| CDX2  | hsa-miR-221-3p   |
| CDX2  | hsa-miR-214-3p   |
| CDX2  | hsa-miR-211-5p   |
| CDX2  | hsa-miR-203a-3p  |
| CDX2  | hsa-miR-200a-3p  |
| CDX2  | hsa-miR-146a-5p  |
| CDX2  | hsa-miR-130b-3p  |
| CDX2  | hsa-miR-128-3p   |
| CDX2  | hsa-miR-125b-5p  |
| CDX2  | hsa-miR-125a-5p  |
| CDX2  | hsa-miR-1234-3p  |
| CDX2  | hsa-miR-107      |
| CDX2  | hsa-miR-106b-5p  |
| CDX2  | hsa-miR-106b-3p  |
| CDX2  | hsa-miR-1-3p     |
| CDX2  | hsa-let-7b-5p    |
| CEBPA | IL10             |
| CEBPA | PTGS2            |
| CEBPA | SMAD3            |
| CEBPA | STAT3            |
| CEBPA | hsa-miR-744-5p   |
| CEBPA | hsa-miR-6780b-5p |
| CEBPA | hsa-miR-6755-5p  |
| CEBPA | hsa-miR-625-3p   |
| CEBPA | hsa-miR-612      |
| CEBPA | hsa-miR-5193     |
| CEBPA | hsa-miR-4768-5p  |
| CEBPA | hsa-miR-4684-5p  |

|       |                  |
|-------|------------------|
| CEBPA | hsa-miR-454-3p   |
| CEBPA | hsa-miR-4463     |
| CEBPA | hsa-miR-4270     |
| CEBPA | hsa-miR-424-5p   |
| CEBPA | hsa-miR-379-3p   |
| CEBPA | hsa-miR-3668     |
| CEBPA | hsa-miR-31-5p    |
| CEBPA | hsa-miR-30d-5p   |
| CEBPA | hsa-miR-30a-5p   |
| CEBPA | hsa-miR-222-3p   |
| CEBPA | hsa-miR-221-3p   |
| CEBPA | hsa-miR-22-3p    |
| CEBPA | hsa-miR-21-5p    |
| CEBPA | hsa-miR-193b-3p  |
| CEBPA | hsa-miR-1910-3p  |
| CEBPA | hsa-miR-107      |
| CEBPA | hsa-let-7a-5p    |
| CEBPB | HIF1A            |
| CEBPB | IL10             |
| CEBPB | IL2              |
| CEBPB | IL6              |
| CEBPB | NFKB1            |
| CEBPB | PTGS2            |
| CEBPB | SMAD3            |
| CEBPB | STAT3            |
| CEBPB | TGFB1            |
| CEBPB | TNF              |
| CEBPB | TP53             |
| CEBPB | hsa-let-7a-5p    |
| CEBPB | hsa-let-7i-5p    |
| CEBPB | hsa-miR-100-5p   |
| CEBPB | hsa-miR-1181     |
| CEBPB | hsa-miR-1207-5p  |
| CEBPB | hsa-miR-124-3p   |
| CEBPB | hsa-miR-130b-3p  |
| CEBPB | hsa-miR-1322     |
| CEBPB | hsa-miR-137      |
| CEBPB | hsa-miR-138-2-3p |
| CEBPB | hsa-miR-138-5p   |
| CEBPB | hsa-miR-142-3p   |

|       |                  |
|-------|------------------|
| CEBPB | hsa-miR-143-3p   |
| CEBPB | hsa-miR-145-5p   |
| CEBPB | hsa-miR-155-5p   |
| CEBPB | hsa-miR-1908-5p  |
| CEBPB | hsa-miR-21-5p    |
| CEBPB | hsa-miR-2110     |
| CEBPB | hsa-miR-22-3p    |
| CEBPB | hsa-miR-221-3p   |
| CEBPB | hsa-miR-222-3p   |
| CEBPB | hsa-miR-296-3p   |
| CEBPB | hsa-miR-30a-5p   |
| CEBPB | hsa-miR-3165     |
| CEBPB | hsa-miR-320a     |
| CEBPB | hsa-miR-365a-3p  |
| CEBPB | hsa-miR-365a-5p  |
| CEBPB | hsa-miR-4282     |
| CEBPB | hsa-miR-4470     |
| CEBPB | hsa-miR-4684-5p  |
| CEBPB | hsa-miR-4698     |
| CEBPB | hsa-miR-4736     |
| CEBPB | hsa-miR-4738-3p  |
| CEBPB | hsa-miR-4804-3p  |
| CEBPB | hsa-miR-484      |
| CEBPB | hsa-miR-663a     |
| CEBPB | hsa-miR-93-5p    |
| CEBPB | hsa-miR-942-5p   |
| CEBPB | hsa-miR-935      |
| CEBPB | hsa-miR-92b-3p   |
| CEBPB | hsa-miR-9-5p     |
| CEBPB | hsa-miR-7158-5p  |
| CEBPB | hsa-miR-6875-3p  |
| CEBPB | hsa-miR-6872-3p  |
| CEBPB | hsa-miR-6825-5p  |
| CEBPB | hsa-miR-6815-3p  |
| CEBPB | hsa-miR-6809-3p  |
| CEBPB | hsa-miR-6789-3p  |
| CEBPB | hsa-miR-6780b-5p |
| CEBPB | hsa-miR-6762-3p  |
| CEBPB | hsa-miR-6760-5p  |
| CEBPB | hsa-miR-6755-5p  |

|       |                 |
|-------|-----------------|
| CEBPB | hsa-miR-6731-5p |
| CEBPB | hsa-miR-625-3p  |
| CEBPB | hsa-miR-6127    |
| CEBPB | hsa-miR-612     |
| CEBPB | hsa-miR-589-5p  |
| CEBPB | hsa-miR-589-3p  |
| CEBPB | hsa-miR-5703    |
| CEBPB | hsa-miR-5702    |
| CEBPB | hsa-miR-558     |
| CEBPB | hsa-miR-5197-5p |
| CEBPB | hsa-miR-5196-3p |
| CEBPB | hsa-miR-5193    |
| CEBPB | hsa-miR-485-5p  |
| CEBPB | hsa-miR-4799-5p |
| CEBPB | hsa-miR-4795-5p |
| CEBPB | hsa-miR-4728-5p |
| CEBPB | hsa-miR-4697-3p |
| CEBPB | hsa-miR-4651    |
| CEBPB | hsa-miR-454-3p  |
| CEBPB | hsa-miR-4516    |
| CEBPB | hsa-miR-4510    |
| CEBPB | hsa-miR-449c-5p |
| CEBPB | hsa-miR-4279    |
| CEBPB | hsa-miR-4270    |
| CEBPB | hsa-miR-424-5p  |
| CEBPB | hsa-miR-379-3p  |
| CEBPB | hsa-miR-375     |
| CEBPB | hsa-miR-3609    |
| CEBPB | hsa-miR-34b-5p  |
| CEBPB | hsa-miR-34a-5p  |
| CEBPB | hsa-miR-324-5p  |
| CEBPB | hsa-miR-324-3p  |
| CEBPB | hsa-miR-3199    |
| CEBPB | hsa-miR-3128    |
| CEBPB | hsa-miR-30e-5p  |
| CEBPB | hsa-miR-27a-3p  |
| CEBPB | hsa-miR-26a-5p  |
| CEBPB | hsa-miR-2682-5p |
| CEBPB | hsa-miR-25-3p   |
| CEBPB | hsa-miR-24-3p   |

|       |                 |
|-------|-----------------|
| CEBPB | hsa-miR-211-5p  |
| CEBPB | hsa-miR-210-3p  |
| CEBPB | hsa-miR-20a-5p  |
| CEBPB | hsa-miR-200a-3p |
| CEBPB | hsa-miR-19b-3p  |
| CEBPB | hsa-miR-19a-3p  |
| CEBPB | hsa-miR-199b-5p |
| CEBPB | hsa-miR-199a-5p |
| CEBPB | hsa-miR-199a-3p |
| CEBPB | hsa-miR-193b-3p |
| CEBPB | hsa-miR-18a-5p  |
| CEBPB | hsa-miR-18a-3p  |
| CEBPB | hsa-miR-185-5p  |
| CEBPB | hsa-miR-181c-5p |
| CEBPB | hsa-miR-17-5p   |
| CEBPB | hsa-miR-150-5p  |
| CEBPB | hsa-miR-146b-5p |
| CEBPB | hsa-miR-144-3p  |
| CEBPB | hsa-miR-1288-5p |
| CEBPB | hsa-miR-1273f   |
| CEBPB | hsa-miR-1249-5p |
| CEBPB | hsa-miR-107     |
| CEBPB | hsa-miR-106b-5p |
| CEBPB | hsa-miR-106b-3p |
| CEBPB | hsa-miR-101-3p  |
| CEBPB | hsa-let-7b-5p   |
| CEBPD | HIF1A           |
| CEBPD | SMAD3           |
| CEBPD | STAT3           |
| CEBPD | TGFB1           |
| CEBPD | TP53            |
| CEBPD | hsa-miR-1207-5p |
| CEBPD | hsa-miR-1908-5p |
| CEBPD | hsa-miR-663a    |
| CEBPD | hsa-miR-618     |
| CEBPD | hsa-miR-5193    |
| CEBPD | hsa-miR-4736    |
| CEBPD | hsa-miR-4487    |
| CEBPD | hsa-miR-4441    |
| CEBPD | hsa-miR-375     |

|       |                 |
|-------|-----------------|
| CEBPD | hsa-miR-210-3p  |
| CEBPD | hsa-miR-200a-3p |
| CEBPD | hsa-miR-150-5p  |
| CEBPD | hsa-miR-145-5p  |
| CEBPD | hsa-miR-142-3p  |
| CEBPD | hsa-miR-132-3p  |
| CEBPG | TP53            |
| CLOCK | IL6             |
| CLOCK | SMAD3           |
| CLOCK | STAT3           |
| CLOCK | TP53            |
| CLOCK | hsa-miR-9-5p    |
| CLOCK | hsa-miR-5702    |
| CLOCK | hsa-miR-558     |
| CLOCK | hsa-miR-449c-5p |
| CLOCK | hsa-miR-19a-3p  |
| CLOCK | hsa-miR-194-3p  |
| CLOCK | hsa-miR-18a-5p  |
| CLOCK | hsa-miR-18a-3p  |
| CREB1 | HIF1A           |
| CREB1 | NFKB1           |
| CREB1 | PTGS2           |
| CREB1 | SMAD3           |
| CREB1 | STAT3           |
| CREB1 | TGFB1           |
| CREB1 | TP53            |
| CREB1 | hsa-miR-1908-5p |
| CREB1 | hsa-miR-320a    |
| CREB1 | hsa-miR-935     |
| CREB1 | hsa-miR-93-5p   |
| CREB1 | hsa-miR-92b-3p  |
| CREB1 | hsa-miR-9-5p    |
| CREB1 | hsa-miR-7-5p    |
| CREB1 | hsa-miR-6875-3p |
| CREB1 | hsa-miR-6872-3p |
| CREB1 | hsa-miR-6825-5p |
| CREB1 | hsa-miR-6815-3p |
| CREB1 | hsa-miR-6809-3p |
| CREB1 | hsa-miR-6797-5p |
| CREB1 | hsa-miR-6789-3p |

|        |                 |
|--------|-----------------|
| CREB1  | hsa-miR-6785-5p |
| CREB1  | hsa-miR-663a    |
| CREB1  | hsa-miR-5703    |
| CREB1  | hsa-miR-484     |
| CREB1  | hsa-miR-4795-5p |
| CREB1  | hsa-miR-4763-3p |
| CREB1  | hsa-miR-4738-3p |
| CREB1  | hsa-miR-4697-3p |
| CREB1  | hsa-miR-4651    |
| CREB1  | hsa-miR-4531    |
| CREB1  | hsa-miR-449c-5p |
| CREB1  | hsa-miR-4434    |
| CREB1  | hsa-miR-375     |
| CREB1  | hsa-miR-3662    |
| CREB1  | hsa-miR-365a-5p |
| CREB1  | hsa-miR-365a-3p |
| CREB1  | hsa-miR-33a-5p  |
| CREB1  | hsa-miR-27a-3p  |
| CREB1  | hsa-miR-2682-5p |
| CREB1  | hsa-miR-25-3p   |
| CREB1  | hsa-miR-24-3p   |
| CREB1  | hsa-miR-22-3p   |
| CREB1  | hsa-miR-2110    |
| CREB1  | hsa-miR-210-3p  |
| CREB1  | hsa-miR-21-5p   |
| CREB1  | hsa-miR-194-3p  |
| CREB1  | hsa-miR-193b-3p |
| CREB1  | hsa-miR-155-5p  |
| CREB1  | hsa-miR-150-5p  |
| CREB1  | hsa-miR-142-3p  |
| CREB1  | hsa-miR-137     |
| CREB1  | hsa-miR-132-3p  |
| CREB1  | hsa-miR-124-3p  |
| CREB1  | hsa-miR-1181    |
| CREB1  | hsa-miR-106b-5p |
| CREB1  | hsa-miR-106b-3p |
| CREB1  | hsa-let-7i-5p   |
| CREB1  | hsa-let-7b-5p   |
| CREBL2 | FOXP3           |
| CTCF   | HIF1A           |



|      |                 |
|------|-----------------|
| CTCF | IL6             |
| CTCF | NFKB1           |
| CTCF | PTGS2           |
| CTCF | SMAD3           |
| CTCF | STAT3           |
| CTCF | TGFB1           |
| CTCF | TP53            |
| CTCF | TLR4            |
| CTCF | IL10            |
| CTCF | IL17A           |
| CTCF | TNF             |
| CTCF | IL2             |
| CTCF | FOXP3           |
| CTCF | hsa-let-7a-5p   |
| CTCF | hsa-let-7c-5p   |
| CTCF | hsa-let-7i-5p   |
| CTCF | hsa-miR-100-5p  |
| CTCF | hsa-miR-101-3p  |
| CTCF | hsa-miR-1181    |
| CTCF | hsa-miR-1207-5p |
| CTCF | hsa-miR-1233-5p |
| CTCF | hsa-miR-1234-3p |
| CTCF | hsa-miR-124-3p  |
| CTCF | hsa-miR-130a-3p |
| CTCF | hsa-miR-130b-3p |
| CTCF | hsa-miR-1322    |
| CTCF | hsa-miR-137     |
| CTCF | hsa-miR-138-5p  |
| CTCF | hsa-miR-143-3p  |
| CTCF | hsa-miR-144-3p  |
| CTCF | hsa-miR-145-5p  |
| CTCF | hsa-miR-150-5p  |
| CTCF | hsa-miR-155-5p  |
| CTCF | hsa-miR-17-5p   |
| CTCF | hsa-miR-18a-3p  |
| CTCF | hsa-miR-18a-5p  |
| CTCF | hsa-miR-1908-5p |
| CTCF | hsa-miR-22-3p   |
| CTCF | hsa-miR-221-3p  |
| CTCF | hsa-miR-222-3p  |

|      |                  |
|------|------------------|
| CTCF | hsa-miR-24-3p    |
| CTCF | hsa-miR-27a-3p   |
| CTCF | hsa-miR-3074-3p  |
| CTCF | hsa-miR-30d-5p   |
| CTCF | hsa-miR-3199     |
| CTCF | hsa-miR-320a     |
| CTCF | hsa-miR-34b-5p   |
| CTCF | hsa-miR-365a-3p  |
| CTCF | hsa-miR-365a-5p  |
| CTCF | hsa-miR-375      |
| CTCF | hsa-miR-4290     |
| CTCF | hsa-miR-4306     |
| CTCF | hsa-miR-4434     |
| CTCF | hsa-miR-4499     |
| CTCF | hsa-miR-449c-5p  |
| CTCF | hsa-miR-4531     |
| CTCF | hsa-miR-4651     |
| CTCF | hsa-miR-4697-3p  |
| CTCF | hsa-miR-4738-3p  |
| CTCF | hsa-miR-484      |
| CTCF | hsa-miR-509-3-5p |
| CTCF | hsa-miR-509-5p   |
| CTCF | hsa-miR-589-3p   |
| CTCF | hsa-miR-589-5p   |
| CTCF | hsa-miR-630      |
| CTCF | hsa-miR-663a     |
| CTCF | hsa-miR-7-5p     |
| CTCF | hsa-miR-9-5p     |
| CTCF | hsa-miR-92b-3p   |
| CTCF | hsa-miR-942-5p   |
| CTCF | hsa-miR-99a-5p   |
| CTCF | hsa-miR-98-5p    |
| CTCF | hsa-miR-940      |
| CTCF | hsa-miR-937-5p   |
| CTCF | hsa-miR-935      |
| CTCF | hsa-miR-93-5p    |
| CTCF | hsa-miR-92a-3p   |
| CTCF | hsa-miR-92a-2-5p |
| CTCF | hsa-miR-92a-1-5p |
| CTCF | hsa-miR-922      |

|      |                  |
|------|------------------|
| CTCF | hsa-miR-889-3p   |
| CTCF | hsa-miR-877-3p   |
| CTCF | hsa-miR-874-3p   |
| CTCF | hsa-miR-8085     |
| CTCF | hsa-miR-8071     |
| CTCF | hsa-miR-8055     |
| CTCF | hsa-miR-8052     |
| CTCF | hsa-miR-744-5p   |
| CTCF | hsa-miR-7158-5p  |
| CTCF | hsa-miR-7151-3p  |
| CTCF | hsa-miR-7150     |
| CTCF | hsa-miR-7113-5p  |
| CTCF | hsa-miR-7110-5p  |
| CTCF | hsa-miR-7110-3p  |
| CTCF | hsa-miR-6893-5p  |
| CTCF | hsa-miR-6883-5p  |
| CTCF | hsa-miR-6882-5p  |
| CTCF | hsa-miR-6880-5p  |
| CTCF | hsa-miR-6878-5p  |
| CTCF | hsa-miR-6875-3p  |
| CTCF | hsa-miR-6872-3p  |
| CTCF | hsa-miR-6871-3p  |
| CTCF | hsa-miR-6845-3p  |
| CTCF | hsa-miR-6842-5p  |
| CTCF | hsa-miR-6837-5p  |
| CTCF | hsa-miR-6835-5p  |
| CTCF | hsa-miR-6833-3p  |
| CTCF | hsa-miR-6825-5p  |
| CTCF | hsa-miR-6815-3p  |
| CTCF | hsa-miR-6809-3p  |
| CTCF | hsa-miR-6808-5p  |
| CTCF | hsa-miR-6807-5p  |
| CTCF | hsa-miR-6807-3p  |
| CTCF | hsa-miR-6806-5p  |
| CTCF | hsa-miR-6803-5p  |
| CTCF | hsa-miR-6797-5p  |
| CTCF | hsa-miR-6789-3p  |
| CTCF | hsa-miR-6785-5p  |
| CTCF | hsa-miR-6780b-5p |
| CTCF | hsa-miR-6778-5p  |

|      |                  |
|------|------------------|
| CTCF | hsa-miR-6766-5p  |
| CTCF | hsa-miR-6762-3p  |
| CTCF | hsa-miR-6760-5p  |
| CTCF | hsa-miR-6756-5p  |
| CTCF | hsa-miR-6755-5p  |
| CTCF | hsa-miR-6754-5p  |
| CTCF | hsa-miR-6752-5p  |
| CTCF | hsa-miR-6751-5p  |
| CTCF | hsa-miR-6749-3p  |
| CTCF | hsa-miR-6731-5p  |
| CTCF | hsa-miR-6722-3p  |
| CTCF | hsa-miR-660-3p   |
| CTCF | hsa-miR-652-3p   |
| CTCF | hsa-miR-6511a-5p |
| CTCF | hsa-miR-633      |
| CTCF | hsa-miR-625-3p   |
| CTCF | hsa-miR-622      |
| CTCF | hsa-miR-618      |
| CTCF | hsa-miR-6133     |
| CTCF | hsa-miR-6130     |
| CTCF | hsa-miR-6129     |
| CTCF | hsa-miR-6127     |
| CTCF | hsa-miR-612      |
| CTCF | hsa-miR-608      |
| CTCF | hsa-miR-605-5p   |
| CTCF | hsa-miR-576-3p   |
| CTCF | hsa-miR-5703     |
| CTCF | hsa-miR-5702     |
| CTCF | hsa-miR-5693     |
| CTCF | hsa-miR-5692a    |
| CTCF | hsa-miR-5681b    |
| CTCF | hsa-miR-5681a    |
| CTCF | hsa-miR-5581-3p  |
| CTCF | hsa-miR-558      |
| CTCF | hsa-miR-548n     |
| CTCF | hsa-miR-548g-3p  |
| CTCF | hsa-miR-548ah-5p |
| CTCF | hsa-miR-526b-5p  |
| CTCF | hsa-miR-519d-3p  |
| CTCF | hsa-miR-519c-3p  |

|      |                  |
|------|------------------|
| CTCF | hsa-miR-5197-5p  |
| CTCF | hsa-miR-5196-3p  |
| CTCF | hsa-miR-5193     |
| CTCF | hsa-miR-513b-3p  |
| CTCF | hsa-miR-5095     |
| CTCF | hsa-miR-5094     |
| CTCF | hsa-miR-5089-3p  |
| CTCF | hsa-miR-504-5p   |
| CTCF | hsa-miR-500b-3p  |
| CTCF | hsa-miR-5003-5p  |
| CTCF | hsa-miR-494-3p   |
| CTCF | hsa-miR-491-5p   |
| CTCF | hsa-miR-485-5p   |
| CTCF | hsa-miR-4804-3p  |
| CTCF | hsa-miR-4799-5p  |
| CTCF | hsa-miR-4795-5p  |
| CTCF | hsa-miR-4778-3p  |
| CTCF | hsa-miR-4768-5p  |
| CTCF | hsa-miR-4763-3p  |
| CTCF | hsa-miR-4748     |
| CTCF | hsa-miR-4742-3p  |
| CTCF | hsa-miR-4736     |
| CTCF | hsa-miR-4735-3p  |
| CTCF | hsa-miR-4728-5p  |
| CTCF | hsa-miR-4725-3p  |
| CTCF | hsa-miR-4720-3p  |
| CTCF | hsa-miR-4698     |
| CTCF | hsa-miR-4694-3p  |
| CTCF | hsa-miR-4685-5p  |
| CTCF | hsa-miR-4684-5p  |
| CTCF | hsa-miR-4682     |
| CTCF | hsa-miR-4662a-5p |
| CTCF | hsa-miR-4659b-3p |
| CTCF | hsa-miR-4659a-3p |
| CTCF | hsa-miR-4650-5p  |
| CTCF | hsa-miR-4644     |
| CTCF | hsa-miR-454-3p   |
| CTCF | hsa-miR-452-5p   |
| CTCF | hsa-miR-4510     |
| CTCF | hsa-miR-4487     |

|      |                 |
|------|-----------------|
| CTCF | hsa-miR-4470    |
| CTCF | hsa-miR-4464    |
| CTCF | hsa-miR-4463    |
| CTCF | hsa-miR-4441    |
| CTCF | hsa-miR-4438    |
| CTCF | hsa-miR-4419a   |
| CTCF | hsa-miR-4418    |
| CTCF | hsa-miR-4286    |
| CTCF | hsa-miR-4282    |
| CTCF | hsa-miR-4279    |
| CTCF | hsa-miR-4271    |
| CTCF | hsa-miR-4270    |
| CTCF | hsa-miR-424-5p  |
| CTCF | hsa-miR-3934-5p |
| CTCF | hsa-miR-380-5p  |
| CTCF | hsa-miR-379-3p  |
| CTCF | hsa-miR-371b-3p |
| CTCF | hsa-miR-3668    |
| CTCF | hsa-miR-3662    |
| CTCF | hsa-miR-365b-5p |
| CTCF | hsa-miR-3658    |
| CTCF | hsa-miR-3609    |
| CTCF | hsa-miR-3529-3p |
| CTCF | hsa-miR-34a-5p  |
| CTCF | hsa-miR-33a-5p  |
| CTCF | hsa-miR-337-3p  |
| CTCF | hsa-miR-335-5p  |
| CTCF | hsa-miR-329-5p  |
| CTCF | hsa-miR-324-5p  |
| CTCF | hsa-miR-324-3p  |
| CTCF | hsa-miR-3165    |
| CTCF | hsa-miR-3160-3p |
| CTCF | hsa-miR-3128    |
| CTCF | hsa-miR-3121-3p |
| CTCF | hsa-miR-31-5p   |
| CTCF | hsa-miR-30e-5p  |
| CTCF | hsa-miR-30c-5p  |
| CTCF | hsa-miR-30b-5p  |
| CTCF | hsa-miR-30a-5p  |
| CTCF | hsa-miR-3065-5p |

|      |                 |
|------|-----------------|
| CTCF | hsa-miR-29b-3p  |
| CTCF | hsa-miR-299-5p  |
| CTCF | hsa-miR-296-3p  |
| CTCF | hsa-miR-26b-5p  |
| CTCF | hsa-miR-26a-5p  |
| CTCF | hsa-miR-2682-5p |
| CTCF | hsa-miR-25-3p   |
| CTCF | hsa-miR-223-3p  |
| CTCF | hsa-miR-217     |
| CTCF | hsa-miR-214-3p  |
| CTCF | hsa-miR-2110    |
| CTCF | hsa-miR-211-5p  |
| CTCF | hsa-miR-210-3p  |
| CTCF | hsa-miR-21-5p   |
| CTCF | hsa-miR-20b-5p  |
| CTCF | hsa-miR-20a-5p  |
| CTCF | hsa-miR-203a-3p |
| CTCF | hsa-miR-200a-3p |
| CTCF | hsa-miR-19b-3p  |
| CTCF | hsa-miR-19a-3p  |
| CTCF | hsa-miR-199b-5p |
| CTCF | hsa-miR-199a-5p |
| CTCF | hsa-miR-199a-3p |
| CTCF | hsa-miR-1972    |
| CTCF | hsa-miR-195-5p  |
| CTCF | hsa-miR-194-3p  |
| CTCF | hsa-miR-193b-3p |
| CTCF | hsa-miR-1910-3p |
| CTCF | hsa-miR-1909-3p |
| CTCF | hsa-miR-18b-5p  |
| CTCF | hsa-miR-187-3p  |
| CTCF | hsa-miR-185-5p  |
| CTCF | hsa-miR-181c-5p |
| CTCF | hsa-miR-181a-5p |
| CTCF | hsa-miR-16-5p   |
| CTCF | hsa-miR-15b-5p  |
| CTCF | hsa-miR-15a-5p  |
| CTCF | hsa-miR-153-5p  |
| CTCF | hsa-miR-151a-3p |
| CTCF | hsa-miR-149-5p  |

|       |                  |
|-------|------------------|
| CTCF  | hsa-miR-149-3p   |
| CTCF  | hsa-miR-146b-5p  |
| CTCF  | hsa-miR-146a-5p  |
| CTCF  | hsa-miR-1468-3p  |
| CTCF  | hsa-miR-142-3p   |
| CTCF  | hsa-miR-139-5p   |
| CTCF  | hsa-miR-138-2-3p |
| CTCF  | hsa-miR-132-3p   |
| CTCF  | hsa-miR-1296-3p  |
| CTCF  | hsa-miR-1288-5p  |
| CTCF  | hsa-miR-1285-3p  |
| CTCF  | hsa-miR-128-3p   |
| CTCF  | hsa-miR-1273f    |
| CTCF  | hsa-miR-1264     |
| CTCF  | hsa-miR-125b-5p  |
| CTCF  | hsa-miR-125a-5p  |
| CTCF  | hsa-miR-1249-5p  |
| CTCF  | hsa-miR-122-5p   |
| CTCF  | hsa-miR-1178-3p  |
| CTCF  | hsa-miR-10b-5p   |
| CTCF  | hsa-miR-107      |
| CTCF  | hsa-miR-106b-5p  |
| CTCF  | hsa-miR-106b-3p  |
| CTCF  | hsa-miR-106a-5p  |
| CTCF  | hsa-miR-106a-3p  |
| CTCF  | hsa-miR-1-3p     |
| CTCF  | hsa-let-7e-5p    |
| CTCF  | hsa-let-7b-5p    |
| CTCFL | IL6              |
| CTCFL | TGFB1            |
| CTCFL | TP53             |
| CTCFL | hsa-let-7i-5p    |
| CTCFL | hsa-miR-138-5p   |
| CTCFL | hsa-miR-145-5p   |
| CTCFL | hsa-miR-4651     |
| CTCFL | hsa-miR-484      |
| CTCFL | hsa-miR-663a     |
| CTCFL | hsa-miR-9-5p     |
| CTCFL | hsa-miR-6825-5p  |
| CTCFL | hsa-miR-6815-3p  |



|       |                 |
|-------|-----------------|
| CTCFL | hsa-miR-6785-5p |
| CTCFL | hsa-miR-6760-5p |
| CTCFL | hsa-miR-589-5p  |
| CTCFL | hsa-miR-589-3p  |
| CTCFL | hsa-miR-5703    |
| CTCFL | hsa-miR-4697-3p |
| CTCFL | hsa-miR-34b-5p  |
| CUX1  | HIF1A           |
| CUX1  | IL17A           |
| CUX1  | IL6             |
| CUX1  | NFKB1           |
| CUX1  | SMAD3           |
| CUX1  | STAT3           |
| CUX1  | TGFB1           |
| CUX1  | TLR4            |
| CUX1  | TNF             |
| CUX1  | TP53            |
| CUX1  | hsa-miR-1181    |
| CUX1  | hsa-miR-1207-5p |
| CUX1  | hsa-miR-1288-5p |
| CUX1  | hsa-miR-1322    |
| CUX1  | hsa-miR-17-5p   |
| CUX1  | hsa-miR-1908-5p |
| CUX1  | hsa-miR-2110    |
| CUX1  | hsa-miR-3160-3p |
| CUX1  | hsa-miR-3662    |
| CUX1  | hsa-miR-4799-5p |
| CUX1  | hsa-miR-942-5p  |
| CUX1  | hsa-miR-6872-3p |
| CUX1  | hsa-miR-6833-3p |
| CUX1  | hsa-miR-5702    |
| CUX1  | hsa-miR-5196-3p |
| CUX1  | hsa-miR-5193    |
| CUX1  | hsa-miR-504-5p  |
| CUX1  | hsa-miR-4736    |
| CUX1  | hsa-miR-4650-5p |
| CUX1  | hsa-miR-4487    |
| CUX1  | hsa-miR-365a-5p |
| CUX1  | hsa-miR-365a-3p |
| CUX1  | hsa-miR-3128    |

|      |                 |
|------|-----------------|
| CUX1 | hsa-miR-22-3p   |
| CUX1 | hsa-miR-210-3p  |
| CUX1 | hsa-miR-199b-5p |
| CUX1 | hsa-miR-1972    |
| CUX1 | hsa-miR-155-5p  |
| CUX1 | hsa-miR-142-3p  |
| CUX1 | hsa-miR-128-3p  |
| DBP  | HIF1A           |
| DBP  | NFKB1           |
| DBP  | PTGS2           |
| DBP  | STAT3           |
| DBP  | TGFB1           |
| DBP  | TP53            |
| DLX1 | HIF1A           |
| DLX1 | PTGS2           |
| DLX1 | SMAD3           |
| DLX1 | STAT3           |
| DLX1 | TP53            |
| DLX1 | hsa-miR-93-5p   |
| DLX1 | hsa-miR-7-5p    |
| DLX1 | hsa-miR-6807-5p |
| DLX1 | hsa-miR-6807-3p |
| DLX1 | hsa-miR-5692a   |
| DLX1 | hsa-miR-4804-3p |
| DLX1 | hsa-miR-4763-3p |
| DLX1 | hsa-miR-4742-3p |
| DLX1 | hsa-miR-3934-5p |
| DLX1 | hsa-miR-335-5p  |
| DLX1 | hsa-miR-25-3p   |
| DLX1 | hsa-miR-221-3p  |
| DLX1 | hsa-miR-132-3p  |
| DLX1 | hsa-miR-130b-3p |
| DLX1 | hsa-miR-106b-5p |
| DLX1 | hsa-miR-106b-3p |
| DLX1 | hsa-let-7a-5p   |
| E2F1 | PTGS2           |
| E2F1 | STAT3           |
| E2F1 | TP53            |
| E2F1 | HIF1A           |
| E2F1 | NFKB1           |

|      |                 |
|------|-----------------|
| E2F1 | SMAD3           |
| E2F1 | hsa-miR-935     |
| E2F1 | hsa-miR-6872-3p |
| E2F1 | hsa-miR-375     |
| E2F1 | hsa-miR-365a-5p |
| E2F1 | hsa-miR-365a-3p |
| E2F2 | HIF1A           |
| E2F2 | PTGS2           |
| E2F2 | SMAD3           |
| E2F2 | TP53            |
| E2F2 | hsa-miR-5702    |
| E2F2 | hsa-miR-22-3p   |
| E2F2 | hsa-miR-2110    |
| E2F2 | hsa-miR-1273f   |
| E2F3 | HIF1A           |
| E2F3 | TP53            |
| E2F3 | hsa-miR-93-5p   |
| E2F3 | hsa-miR-6807-5p |
| E2F3 | hsa-miR-6807-3p |
| E2F3 | hsa-miR-5692a   |
| E2F3 | hsa-miR-25-3p   |
| E2F3 | hsa-miR-194-3p  |
| E2F3 | hsa-miR-106b-5p |
| E2F3 | hsa-miR-106b-3p |
| E2F4 | HIF1A           |
| E2F4 | IL17A           |
| E2F4 | NFKB1           |
| E2F4 | PTGS2           |
| E2F4 | STAT3           |
| E2F4 | TGFB1           |
| E2F4 | TNF             |
| E2F4 | TP53            |
| E2F4 | IL6             |
| E2F4 | TLR4            |
| E2F4 | hsa-let-7i-5p   |
| E2F4 | hsa-miR-106a-3p |
| E2F4 | hsa-miR-106a-5p |
| E2F4 | hsa-miR-132-3p  |
| E2F4 | hsa-miR-1908-5p |
| E2F4 | hsa-miR-22-3p   |

|      |                 |
|------|-----------------|
| E2F4 | hsa-miR-4470    |
| E2F4 | hsa-miR-4651    |
| E2F4 | hsa-miR-99a-5p  |
| E2F4 | hsa-miR-942-5p  |
| E2F4 | hsa-miR-922     |
| E2F4 | hsa-miR-9-5p    |
| E2F4 | hsa-miR-8085    |
| E2F4 | hsa-miR-8055    |
| E2F4 | hsa-miR-8052    |
| E2F4 | hsa-miR-7-5p    |
| E2F4 | hsa-miR-6875-3p |
| E2F4 | hsa-miR-6815-3p |
| E2F4 | hsa-miR-6762-3p |
| E2F4 | hsa-miR-6749-3p |
| E2F4 | hsa-miR-6722-3p |
| E2F4 | hsa-miR-663a    |
| E2F4 | hsa-miR-652-3p  |
| E2F4 | hsa-miR-618     |
| E2F4 | hsa-miR-589-5p  |
| E2F4 | hsa-miR-589-3p  |
| E2F4 | hsa-miR-5703    |
| E2F4 | hsa-miR-5197-5p |
| E2F4 | hsa-miR-504-5p  |
| E2F4 | hsa-miR-500b-3p |
| E2F4 | hsa-miR-4795-5p |
| E2F4 | hsa-miR-4763-3p |
| E2F4 | hsa-miR-4697-3p |
| E2F4 | hsa-miR-4499    |
| E2F4 | hsa-miR-4434    |
| E2F4 | hsa-miR-4419a   |
| E2F4 | hsa-miR-4279    |
| E2F4 | hsa-miR-375     |
| E2F4 | hsa-miR-3662    |
| E2F4 | hsa-miR-3160-3p |
| E2F4 | hsa-miR-30e-5p  |
| E2F4 | hsa-miR-30d-5p  |
| E2F4 | hsa-miR-30c-5p  |
| E2F4 | hsa-miR-296-3p  |
| E2F4 | hsa-miR-2682-5p |
| E2F4 | hsa-miR-203a-3p |

|      |                 |
|------|-----------------|
| E2F4 | hsa-miR-18a-5p  |
| E2F4 | hsa-miR-18a-3p  |
| E2F4 | hsa-miR-185-5p  |
| E2F4 | hsa-miR-17-5p   |
| E2F4 | hsa-miR-16-5p   |
| E2F4 | hsa-miR-15b-5p  |
| E2F4 | hsa-miR-15a-5p  |
| E2F4 | hsa-miR-155-5p  |
| E2F4 | hsa-miR-151a-3p |
| E2F4 | hsa-miR-146b-5p |
| E2F4 | hsa-miR-1468-3p |
| E2F4 | hsa-miR-142-3p  |
| E2F4 | hsa-miR-137     |
| E2F4 | hsa-miR-130b-3p |
| E2F4 | hsa-miR-1264    |
| E2F4 | hsa-miR-125b-5p |
| E2F4 | hsa-miR-124-3p  |
| E2F4 | hsa-miR-100-5p  |
| E2F4 | hsa-let-7b-5p   |
| E2F4 | hsa-let-7a-5p   |
| E2F6 | HIF1A           |
| E2F6 | IL6             |
| E2F6 | NFKB1           |
| E2F6 | PTGS2           |
| E2F6 | SMAD3           |
| E2F6 | STAT3           |
| E2F6 | TGFB1           |
| E2F6 | TP53            |
| E2F6 | hsa-let-7i-5p   |
| E2F6 | hsa-miR-142-3p  |
| E2F6 | hsa-miR-17-5p   |
| E2F6 | hsa-miR-18a-3p  |
| E2F6 | hsa-miR-18a-5p  |
| E2F6 | hsa-miR-19a-3p  |
| E2F6 | hsa-miR-20a-5p  |
| E2F6 | hsa-miR-22-3p   |
| E2F6 | hsa-miR-320a    |
| E2F6 | hsa-miR-34b-5p  |
| E2F6 | hsa-miR-4470    |
| E2F6 | hsa-miR-4738-3p |

|      |                  |
|------|------------------|
| E2F6 | hsa-miR-935      |
| E2F6 | hsa-miR-9-5p     |
| E2F6 | hsa-miR-6815-3p  |
| E2F6 | hsa-miR-4659b-3p |
| E2F6 | hsa-miR-4659a-3p |
| E2F6 | hsa-miR-4441     |
| E2F6 | hsa-miR-371b-3p  |
| E2F6 | hsa-miR-200a-3p  |
| E2F6 | hsa-miR-146a-5p  |
| E2F6 | hsa-miR-145-5p   |
| E2F6 | hsa-miR-139-5p   |
| E2F6 | hsa-miR-138-5p   |
| E2F6 | hsa-miR-1273f    |
| E2F6 | hsa-miR-125b-5p  |
| E2F6 | hsa-miR-124-3p   |
| E2F6 | hsa-miR-1207-5p  |
| E2F7 | HIF1A            |
| E2F7 | TP53             |
| E2F7 | IL6              |
| E2F7 | PTGS2            |
| E2F7 | SMAD3            |
| E2F7 | STAT3            |
| E2F7 | hsa-miR-942-5p   |
| E2F7 | hsa-miR-93-5p    |
| E2F7 | hsa-miR-9-5p     |
| E2F7 | hsa-miR-889-3p   |
| E2F7 | hsa-miR-6871-3p  |
| E2F7 | hsa-miR-608      |
| E2F7 | hsa-miR-485-5p   |
| E2F7 | hsa-miR-4271     |
| E2F7 | hsa-miR-380-5p   |
| E2F7 | hsa-miR-337-3p   |
| E2F7 | hsa-miR-3160-3p  |
| E2F7 | hsa-miR-30c-5p   |
| E2F7 | hsa-miR-30a-5p   |
| E2F7 | hsa-miR-29b-3p   |
| E2F7 | hsa-miR-299-5p   |
| E2F7 | hsa-miR-296-3p   |
| E2F7 | hsa-miR-25-3p    |
| E2F7 | hsa-miR-222-3p   |

|      |                  |
|------|------------------|
| E2F7 | hsa-miR-217      |
| E2F7 | hsa-miR-21-5p    |
| E2F7 | hsa-miR-203a-3p  |
| E2F7 | hsa-miR-199a-5p  |
| E2F7 | hsa-miR-199a-3p  |
| E2F7 | hsa-miR-1288-5p  |
| E2F7 | hsa-miR-1249-5p  |
| E2F7 | hsa-miR-106b-5p  |
| E2F7 | hsa-miR-106b-3p  |
| E2F7 | hsa-miR-100-5p   |
| E2F7 | hsa-let-7a-5p    |
| E2F8 | HIF1A            |
| E2F8 | PTGS2            |
| E2F8 | TP53             |
| EBF1 | HIF1A            |
| EBF1 | IL17A            |
| EBF1 | IL6              |
| EBF1 | NFKB1            |
| EBF1 | STAT3            |
| EBF1 | TGFB1            |
| EBF1 | TNF              |
| EBF1 | TP53             |
| EBF1 | hsa-let-7i-5p    |
| EBF1 | hsa-miR-1322     |
| EBF1 | hsa-miR-18a-3p   |
| EBF1 | hsa-miR-18a-5p   |
| EBF1 | hsa-miR-3662     |
| EBF1 | hsa-miR-4434     |
| EBF1 | hsa-miR-4651     |
| EBF1 | hsa-miR-4728-5p  |
| EBF1 | hsa-miR-7-5p     |
| EBF1 | hsa-miR-6871-3p  |
| EBF1 | hsa-miR-6797-5p  |
| EBF1 | hsa-miR-6760-5p  |
| EBF1 | hsa-miR-6752-5p  |
| EBF1 | hsa-miR-6751-5p  |
| EBF1 | hsa-miR-6511a-5p |
| EBF1 | hsa-miR-625-3p   |
| EBF1 | hsa-miR-589-5p   |
| EBF1 | hsa-miR-589-3p   |

|      |                 |
|------|-----------------|
| EBF1 | hsa-miR-4697-3p |
| EBF1 | hsa-miR-4531    |
| EBF1 | hsa-miR-4516    |
| EBF1 | hsa-miR-4463    |
| EBF1 | hsa-miR-379-3p  |
| EBF1 | hsa-miR-365a-5p |
| EBF1 | hsa-miR-365a-3p |
| EBF1 | hsa-miR-3529-3p |
| EBF1 | hsa-miR-30e-5p  |
| EBF1 | hsa-miR-21-5p   |
| EBF1 | hsa-miR-20a-5p  |
| EBF1 | hsa-miR-195-5p  |
| EBF1 | hsa-miR-194-3p  |
| EBF1 | hsa-miR-150-5p  |
| EBF1 | hsa-miR-146a-5p |
| EBF1 | hsa-miR-128-3p  |
| EGR1 | HIF1A           |
| EGR1 | NFKB1           |
| EGR1 | PTGS2           |
| EGR1 | SMAD3           |
| EGR1 | STAT3           |
| EGR1 | TGFB1           |
| EGR1 | TNF             |
| EGR1 | TP53            |
| EGR1 | hsa-miR-132-3p  |
| EGR1 | hsa-miR-2110    |
| EGR1 | hsa-miR-320a    |
| EGR1 | hsa-miR-4470    |
| EGR1 | hsa-miR-4651    |
| EGR1 | hsa-miR-4738-3p |
| EGR1 | hsa-miR-663a    |
| EGR1 | hsa-miR-937-5p  |
| EGR1 | hsa-miR-935     |
| EGR1 | hsa-miR-93-5p   |
| EGR1 | hsa-miR-92b-3p  |
| EGR1 | hsa-miR-9-5p    |
| EGR1 | hsa-miR-877-3p  |
| EGR1 | hsa-miR-8085    |
| EGR1 | hsa-miR-7151-3p |
| EGR1 | hsa-miR-6893-5p |



|      |                  |
|------|------------------|
| EGR1 | hsa-miR-6845-3p  |
| EGR1 | hsa-miR-6842-5p  |
| EGR1 | hsa-miR-6815-3p  |
| EGR1 | hsa-miR-6808-5p  |
| EGR1 | hsa-miR-6807-5p  |
| EGR1 | hsa-miR-6807-3p  |
| EGR1 | hsa-miR-6785-5p  |
| EGR1 | hsa-miR-6760-5p  |
| EGR1 | hsa-miR-6754-5p  |
| EGR1 | hsa-miR-6749-3p  |
| EGR1 | hsa-miR-6722-3p  |
| EGR1 | hsa-miR-622      |
| EGR1 | hsa-miR-5196-3p  |
| EGR1 | hsa-miR-5193     |
| EGR1 | hsa-miR-5003-5p  |
| EGR1 | hsa-miR-484      |
| EGR1 | hsa-miR-4736     |
| EGR1 | hsa-miR-4487     |
| EGR1 | hsa-miR-4418     |
| EGR1 | hsa-miR-34b-5p   |
| EGR1 | hsa-miR-33a-5p   |
| EGR1 | hsa-miR-337-3p   |
| EGR1 | hsa-miR-30c-5p   |
| EGR1 | hsa-miR-30b-5p   |
| EGR1 | hsa-miR-3065-5p  |
| EGR1 | hsa-miR-25-3p    |
| EGR1 | hsa-miR-22-3p    |
| EGR1 | hsa-miR-203a-3p  |
| EGR1 | hsa-miR-200a-3p  |
| EGR1 | hsa-miR-193b-3p  |
| EGR1 | hsa-miR-1910-3p  |
| EGR1 | hsa-miR-185-5p   |
| EGR1 | hsa-miR-146b-5p  |
| EGR1 | hsa-miR-145-5p   |
| EGR1 | hsa-miR-144-3p   |
| EGR1 | hsa-miR-139-5p   |
| EGR1 | hsa-miR-138-5p   |
| EGR1 | hsa-miR-138-2-3p |
| EGR1 | hsa-miR-130b-3p  |
| EGR1 | hsa-miR-1273f    |

|      |                 |
|------|-----------------|
| EGR1 | hsa-miR-124-3p  |
| EGR1 | hsa-miR-1234-3p |
| EGR1 | hsa-miR-106b-5p |
| EGR1 | hsa-miR-106b-3p |
| EGR1 | hsa-let-7i-5p   |
| EGR2 | HIF1A           |
| EGR2 | NFKB1           |
| EGR2 | PTGS2           |
| EGR2 | STAT3           |
| EGR2 | TGFB1           |
| EGR2 | TNF             |
| EGR2 | TP53            |
| EGR2 | hsa-miR-6833-3p |
| EGR2 | hsa-miR-2682-5p |
| EGR2 | hsa-miR-137     |
| EHF  | HIF1A           |
| EHF  | NFKB1           |
| EHF  | PTGS2           |
| EHF  | SMAD3           |
| EHF  | STAT3           |
| EHF  | TGFB1           |
| EHF  | TP53            |
| EHF  | hsa-miR-93-5p   |
| EHF  | hsa-miR-4434    |
| EHF  | hsa-miR-25-3p   |
| EHF  | hsa-miR-1908-5p |
| EHF  | hsa-miR-150-5p  |
| EHF  | hsa-miR-1273f   |
| EHF  | hsa-miR-106b-5p |
| EHF  | hsa-miR-106b-3p |
| ELF1 | PTGS2           |
| ELF1 | STAT3           |
| ELF1 | HIF1A           |
| ELF1 | NFKB1           |
| ELF1 | SMAD3           |
| ELF1 | TGFB1           |
| ELF1 | TNF             |
| ELF1 | TP53            |
| ELF1 | hsa-miR-1181    |
| ELF1 | hsa-miR-124-3p  |

|      |                 |
|------|-----------------|
| ELF1 | hsa-miR-210-3p  |
| ELF1 | hsa-miR-320a    |
| ELF1 | hsa-miR-379-3p  |
| ELF1 | hsa-miR-4470    |
| ELF1 | hsa-miR-4736    |
| ELF1 | hsa-miR-484     |
| ELF1 | hsa-miR-663a    |
| ELF1 | hsa-miR-937-5p  |
| ELF1 | hsa-miR-942-5p  |
| ELF1 | hsa-miR-92b-3p  |
| ELF1 | hsa-miR-9-5p    |
| ELF1 | hsa-miR-7-5p    |
| ELF1 | hsa-miR-6875-3p |
| ELF1 | hsa-miR-6872-3p |
| ELF1 | hsa-miR-6837-5p |
| ELF1 | hsa-miR-6833-3p |
| ELF1 | hsa-miR-6825-5p |
| ELF1 | hsa-miR-6815-3p |
| ELF1 | hsa-miR-6809-3p |
| ELF1 | hsa-miR-6797-5p |
| ELF1 | hsa-miR-6789-3p |
| ELF1 | hsa-miR-6731-5p |
| ELF1 | hsa-miR-625-3p  |
| ELF1 | hsa-miR-618     |
| ELF1 | hsa-miR-612     |
| ELF1 | hsa-miR-589-5p  |
| ELF1 | hsa-miR-589-3p  |
| ELF1 | hsa-miR-5703    |
| ELF1 | hsa-miR-5193    |
| ELF1 | hsa-miR-4795-5p |
| ELF1 | hsa-miR-4763-3p |
| ELF1 | hsa-miR-4748    |
| ELF1 | hsa-miR-4738-3p |
| ELF1 | hsa-miR-4651    |
| ELF1 | hsa-miR-4650-5p |
| ELF1 | hsa-miR-4531    |
| ELF1 | hsa-miR-449c-5p |
| ELF1 | hsa-miR-4487    |
| ELF1 | hsa-miR-4441    |
| ELF1 | hsa-miR-4434    |

|      |                  |
|------|------------------|
| ELF1 | hsa-miR-375      |
| ELF1 | hsa-miR-365a-5p  |
| ELF1 | hsa-miR-365a-3p  |
| ELF1 | hsa-miR-324-5p   |
| ELF1 | hsa-miR-324-3p   |
| ELF1 | hsa-miR-30d-5p   |
| ELF1 | hsa-miR-27a-3p   |
| ELF1 | hsa-miR-24-3p    |
| ELF1 | hsa-miR-22-3p    |
| ELF1 | hsa-miR-2110     |
| ELF1 | hsa-miR-203a-3p  |
| ELF1 | hsa-miR-199b-5p  |
| ELF1 | hsa-miR-199a-5p  |
| ELF1 | hsa-miR-199a-3p  |
| ELF1 | hsa-miR-195-5p   |
| ELF1 | hsa-miR-194-3p   |
| ELF1 | hsa-miR-1908-5p  |
| ELF1 | hsa-miR-155-5p   |
| ELF1 | hsa-miR-150-5p   |
| ELF1 | hsa-miR-145-5p   |
| ELF1 | hsa-miR-144-3p   |
| ELF1 | hsa-miR-143-3p   |
| ELF1 | hsa-miR-142-3p   |
| ELF1 | hsa-miR-139-5p   |
| ELF1 | hsa-miR-138-5p   |
| ELF1 | hsa-miR-138-2-3p |
| ELF1 | hsa-miR-132-3p   |
| ELF1 | hsa-miR-130b-3p  |
| ELF1 | hsa-miR-1273f    |
| ELF1 | hsa-miR-1234-3p  |
| ELF1 | hsa-miR-1207-5p  |
| ELF1 | hsa-let-7i-5p    |
| ELF1 | hsa-let-7b-5p    |
| ELF2 | NFKB1            |
| ELF2 | PTGS2            |
| ELF2 | SMAD3            |
| ELF2 | TP53             |
| ELF2 | hsa-miR-942-5p   |
| ELF2 | hsa-miR-9-5p     |
| ELF2 | hsa-miR-6762-3p  |

|      |                 |
|------|-----------------|
| ELF2 | hsa-miR-4763-3p |
| ELF2 | hsa-let-7b-5p   |
| ELF2 | hsa-let-7a-5p   |
| ELF3 | IL6             |
| ELF3 | hsa-miR-16-5p   |
| ELF3 | hsa-miR-15b-5p  |
| ELK1 | FOXP3           |
| ELK1 | HIF1A           |
| ELK1 | IL6             |
| ELK1 | NFKB1           |
| ELK1 | PTGS2           |
| ELK1 | SMAD3           |
| ELK1 | STAT3           |
| ELK1 | TGFB1           |
| ELK1 | TNF             |
| ELK1 | TP53            |
| ELK1 | hsa-miR-193b-3p |
| ELK1 | hsa-miR-20a-5p  |
| ELK1 | hsa-miR-21-5p   |
| ELK1 | hsa-miR-320a    |
| ELK1 | hsa-miR-365a-3p |
| ELK1 | hsa-miR-365a-5p |
| ELK1 | hsa-miR-4470    |
| ELK1 | hsa-miR-6825-5p |
| ELK1 | hsa-miR-504-5p  |
| ELK1 | hsa-miR-26a-5p  |
| ELK1 | hsa-miR-223-3p  |
| ELK1 | hsa-miR-210-3p  |
| ELK1 | hsa-miR-1908-5p |
| ELK1 | hsa-miR-155-5p  |
| ELK1 | hsa-miR-150-5p  |
| ELK1 | hsa-miR-144-3p  |
| ELK1 | hsa-miR-142-3p  |
| ELK1 | hsa-miR-124-3p  |
| ELK3 | NFKB1           |
| ELK3 | PTGS2           |
| ELK3 | STAT3           |
| ELK3 | TGFB1           |
| ELK3 | TP53            |
| ELK3 | hsa-let-7b-5p   |

|       |                 |
|-------|-----------------|
| ELK3  | hsa-miR-1288-5p |
| ELK3  | hsa-miR-137     |
| ELK3  | hsa-miR-155-5p  |
| ELK3  | hsa-miR-21-5p   |
| ELK3  | hsa-miR-24-3p   |
| ELK3  | hsa-miR-26b-5p  |
| ELK3  | hsa-miR-612     |
| ELK3  | hsa-miR-935     |
| ELK4  | PTGS2           |
| ELK4  | STAT3           |
| ELK4  | TLR4            |
| ELK4  | TP53            |
| ELK4  | hsa-let-7i-5p   |
| ELK4  | hsa-miR-1181    |
| ELK4  | hsa-miR-320a    |
| ELK4  | hsa-miR-4470    |
| ELK4  | hsa-miR-612     |
| ELK4  | hsa-miR-663a    |
| EOMES | IL2             |
| EOMES | IL6             |
| EOMES | NFKB1           |
| EOMES | SMAD3           |
| EOMES | STAT3           |
| EOMES | TP53            |
| EOMES | TGFB1           |
| EOMES | hsa-miR-874-3p  |
| EOMES | hsa-miR-7150    |
| EOMES | hsa-miR-7-5p    |
| EOMES | hsa-miR-618     |
| EOMES | hsa-miR-5702    |
| EOMES | hsa-miR-4768-5p |
| EOMES | hsa-miR-4650-5p |
| EOMES | hsa-miR-449c-5p |
| EOMES | hsa-miR-375     |
| EOMES | hsa-miR-3658    |
| EOMES | hsa-miR-30a-5p  |
| EOMES | hsa-miR-21-5p   |
| EOMES | hsa-miR-1322    |
| EOMES | hsa-miR-1249-5p |
| EOMES | hsa-miR-122-5p  |

|       |                  |
|-------|------------------|
| EOMES | hsa-miR-1207-5p  |
| EOMES | hsa-let-7a-5p    |
| ERF   | HIF1A            |
| ERF   | hsa-miR-6806-5p  |
| ERF   | hsa-miR-130b-3p  |
| ERG   | HIF1A            |
| ERG   | NFKB1            |
| ERG   | PTGS2            |
| ERG   | STAT3            |
| ERG   | TLR4             |
| ERG   | TP53             |
| ERG   | IL2              |
| ERG   | hsa-let-7a-5p    |
| ERG   | hsa-miR-100-5p   |
| ERG   | hsa-miR-101-3p   |
| ERG   | hsa-miR-144-3p   |
| ERG   | hsa-miR-16-5p    |
| ERG   | hsa-miR-214-3p   |
| ERG   | hsa-miR-589-3p   |
| ERG   | hsa-miR-589-5p   |
| ERG   | hsa-miR-874-3p   |
| ERG   | hsa-miR-942-5p   |
| ERG   | hsa-miR-937-5p   |
| ERG   | hsa-miR-935      |
| ERG   | hsa-miR-92b-3p   |
| ERG   | hsa-miR-92a-3p   |
| ERG   | hsa-miR-92a-1-5p |
| ERG   | hsa-miR-9-5p     |
| ERG   | hsa-miR-7158-5p  |
| ERG   | hsa-miR-7-5p     |
| ERG   | hsa-miR-6815-3p  |
| ERG   | hsa-miR-6789-3p  |
| ERG   | hsa-miR-663a     |
| ERG   | hsa-miR-633      |
| ERG   | hsa-miR-612      |
| ERG   | hsa-miR-5703     |
| ERG   | hsa-miR-5702     |
| ERG   | hsa-miR-5681b    |
| ERG   | hsa-miR-5681a    |
| ERG   | hsa-miR-5193     |

|      |                 |
|------|-----------------|
| ERG  | hsa-miR-484     |
| ERG  | hsa-miR-4804-3p |
| ERG  | hsa-miR-4799-5p |
| ERG  | hsa-miR-4795-5p |
| ERG  | hsa-miR-4742-3p |
| ERG  | hsa-miR-4738-3p |
| ERG  | hsa-miR-4736    |
| ERG  | hsa-miR-4516    |
| ERG  | hsa-miR-4434    |
| ERG  | hsa-miR-4290    |
| ERG  | hsa-miR-4279    |
| ERG  | hsa-miR-3934-5p |
| ERG  | hsa-miR-320a    |
| ERG  | hsa-miR-3199    |
| ERG  | hsa-miR-3165    |
| ERG  | hsa-miR-3121-3p |
| ERG  | hsa-miR-29b-3p  |
| ERG  | hsa-miR-27a-3p  |
| ERG  | hsa-miR-2682-5p |
| ERG  | hsa-miR-24-3p   |
| ERG  | hsa-miR-2110    |
| ERG  | hsa-miR-210-3p  |
| ERG  | hsa-miR-20a-5p  |
| ERG  | hsa-miR-203a-3p |
| ERG  | hsa-miR-19b-3p  |
| ERG  | hsa-miR-19a-3p  |
| ERG  | hsa-miR-1908-5p |
| ERG  | hsa-miR-18a-5p  |
| ERG  | hsa-miR-18a-3p  |
| ERG  | hsa-miR-17-5p   |
| ERG  | hsa-miR-155-5p  |
| ERG  | hsa-miR-149-5p  |
| ERG  | hsa-miR-149-3p  |
| ERG  | hsa-miR-137     |
| ERG  | hsa-miR-132-3p  |
| ERG  | hsa-miR-124-3p  |
| ERG  | hsa-miR-1181    |
| ERG  | hsa-miR-1-3p    |
| ERG  | hsa-let-7i-5p   |
| ESR1 | HIF1A           |



|      |                  |
|------|------------------|
| ESR1 | NFKB1            |
| ESR1 | STAT3            |
| ESR1 | TLR4             |
| ESR1 | TGFB1            |
| ESR1 | TP53             |
| ESR1 | IL10             |
| ESR1 | PTGS2            |
| ESR1 | hsa-miR-24-3p    |
| ESR1 | hsa-miR-27a-3p   |
| ESR1 | hsa-miR-30a-5p   |
| ESR1 | hsa-miR-365b-5p  |
| ESR1 | hsa-miR-4698     |
| ESR1 | hsa-miR-4725-3p  |
| ESR1 | hsa-miR-589-3p   |
| ESR1 | hsa-miR-589-5p   |
| ESR1 | hsa-miR-612      |
| ESR1 | hsa-miR-937-5p   |
| ESR1 | hsa-miR-935      |
| ESR1 | hsa-miR-92b-3p   |
| ESR1 | hsa-miR-92a-3p   |
| ESR1 | hsa-miR-92a-1-5p |
| ESR1 | hsa-miR-9-5p     |
| ESR1 | hsa-miR-8085     |
| ESR1 | hsa-miR-8071     |
| ESR1 | hsa-miR-744-5p   |
| ESR1 | hsa-miR-7158-5p  |
| ESR1 | hsa-miR-7150     |
| ESR1 | hsa-miR-7113-5p  |
| ESR1 | hsa-miR-6893-5p  |
| ESR1 | hsa-miR-6882-5p  |
| ESR1 | hsa-miR-6880-5p  |
| ESR1 | hsa-miR-6875-3p  |
| ESR1 | hsa-miR-6872-3p  |
| ESR1 | hsa-miR-6871-3p  |
| ESR1 | hsa-miR-6845-3p  |
| ESR1 | hsa-miR-6837-5p  |
| ESR1 | hsa-miR-6825-5p  |
| ESR1 | hsa-miR-6815-3p  |
| ESR1 | hsa-miR-6809-3p  |
| ESR1 | hsa-miR-6808-5p  |

|      |                  |
|------|------------------|
| ESR1 | hsa-miR-6806-5p  |
| ESR1 | hsa-miR-6803-5p  |
| ESR1 | hsa-miR-6797-5p  |
| ESR1 | hsa-miR-6789-3p  |
| ESR1 | hsa-miR-6756-5p  |
| ESR1 | hsa-miR-6754-5p  |
| ESR1 | hsa-miR-6752-5p  |
| ESR1 | hsa-miR-6751-5p  |
| ESR1 | hsa-miR-6722-3p  |
| ESR1 | hsa-miR-663a     |
| ESR1 | hsa-miR-6511a-5p |
| ESR1 | hsa-miR-630      |
| ESR1 | hsa-miR-618      |
| ESR1 | hsa-miR-6129     |
| ESR1 | hsa-miR-6127     |
| ESR1 | hsa-miR-608      |
| ESR1 | hsa-miR-5703     |
| ESR1 | hsa-miR-5681b    |
| ESR1 | hsa-miR-5681a    |
| ESR1 | hsa-miR-5197-5p  |
| ESR1 | hsa-miR-5193     |
| ESR1 | hsa-miR-5089-3p  |
| ESR1 | hsa-miR-500b-3p  |
| ESR1 | hsa-miR-491-5p   |
| ESR1 | hsa-miR-485-5p   |
| ESR1 | hsa-miR-484      |
| ESR1 | hsa-miR-4804-3p  |
| ESR1 | hsa-miR-4799-5p  |
| ESR1 | hsa-miR-4795-5p  |
| ESR1 | hsa-miR-4778-3p  |
| ESR1 | hsa-miR-4763-3p  |
| ESR1 | hsa-miR-4738-3p  |
| ESR1 | hsa-miR-4736     |
| ESR1 | hsa-miR-4735-3p  |
| ESR1 | hsa-miR-4728-5p  |
| ESR1 | hsa-miR-4694-3p  |
| ESR1 | hsa-miR-4685-5p  |
| ESR1 | hsa-miR-4662a-5p |
| ESR1 | hsa-miR-4659b-3p |
| ESR1 | hsa-miR-4659a-3p |

|      |                 |
|------|-----------------|
| ESR1 | hsa-miR-4651    |
| ESR1 | hsa-miR-4644    |
| ESR1 | hsa-miR-4531    |
| ESR1 | hsa-miR-452-5p  |
| ESR1 | hsa-miR-449c-5p |
| ESR1 | hsa-miR-4487    |
| ESR1 | hsa-miR-4470    |
| ESR1 | hsa-miR-4434    |
| ESR1 | hsa-miR-4418    |
| ESR1 | hsa-miR-4306    |
| ESR1 | hsa-miR-4279    |
| ESR1 | hsa-miR-4270    |
| ESR1 | hsa-miR-424-5p  |
| ESR1 | hsa-miR-3934-5p |
| ESR1 | hsa-miR-380-5p  |
| ESR1 | hsa-miR-375     |
| ESR1 | hsa-miR-365a-5p |
| ESR1 | hsa-miR-365a-3p |
| ESR1 | hsa-miR-3609    |
| ESR1 | hsa-miR-337-3p  |
| ESR1 | hsa-miR-329-5p  |
| ESR1 | hsa-miR-324-5p  |
| ESR1 | hsa-miR-324-3p  |
| ESR1 | hsa-miR-320a    |
| ESR1 | hsa-miR-3199    |
| ESR1 | hsa-miR-3165    |
| ESR1 | hsa-miR-3160-3p |
| ESR1 | hsa-miR-30b-5p  |
| ESR1 | hsa-miR-3074-3p |
| ESR1 | hsa-miR-3065-5p |
| ESR1 | hsa-miR-299-5p  |
| ESR1 | hsa-miR-223-3p  |
| ESR1 | hsa-miR-22-3p   |
| ESR1 | hsa-miR-214-3p  |
| ESR1 | hsa-miR-2110    |
| ESR1 | hsa-miR-211-5p  |
| ESR1 | hsa-miR-210-3p  |
| ESR1 | hsa-miR-21-5p   |
| ESR1 | hsa-miR-20a-5p  |
| ESR1 | hsa-miR-203a-3p |

|      |                 |
|------|-----------------|
| ESR1 | hsa-miR-200a-3p |
| ESR1 | hsa-miR-19b-3p  |
| ESR1 | hsa-miR-19a-3p  |
| ESR1 | hsa-miR-199a-5p |
| ESR1 | hsa-miR-199a-3p |
| ESR1 | hsa-miR-195-5p  |
| ESR1 | hsa-miR-193b-3p |
| ESR1 | hsa-miR-1908-5p |
| ESR1 | hsa-miR-18a-5p  |
| ESR1 | hsa-miR-18a-3p  |
| ESR1 | hsa-miR-187-3p  |
| ESR1 | hsa-miR-185-5p  |
| ESR1 | hsa-miR-181c-5p |
| ESR1 | hsa-miR-17-5p   |
| ESR1 | hsa-miR-16-5p   |
| ESR1 | hsa-miR-15b-5p  |
| ESR1 | hsa-miR-155-5p  |
| ESR1 | hsa-miR-151a-3p |
| ESR1 | hsa-miR-149-5p  |
| ESR1 | hsa-miR-149-3p  |
| ESR1 | hsa-miR-1468-3p |
| ESR1 | hsa-miR-145-5p  |
| ESR1 | hsa-miR-143-3p  |
| ESR1 | hsa-miR-142-3p  |
| ESR1 | hsa-miR-139-5p  |
| ESR1 | hsa-miR-132-3p  |
| ESR1 | hsa-miR-130b-3p |
| ESR1 | hsa-miR-1288-5p |
| ESR1 | hsa-miR-1285-3p |
| ESR1 | hsa-miR-1273f   |
| ESR1 | hsa-miR-125a-5p |
| ESR1 | hsa-miR-1249-5p |
| ESR1 | hsa-miR-124-3p  |
| ESR1 | hsa-miR-1234-3p |
| ESR1 | hsa-miR-1207-5p |
| ESR1 | hsa-miR-1181    |
| ESR1 | hsa-miR-1178-3p |
| ESR1 | hsa-miR-10b-5p  |
| ESR1 | hsa-miR-1-3p    |
| ESR1 | hsa-let-7i-5p   |

|       |                  |
|-------|------------------|
| ESR1  | hsa-let-7e-5p    |
| ESR1  | hsa-let-7b-5p    |
| ESR1  | hsa-let-7a-5p    |
| ESR2  | STAT3            |
| ESR2  | hsa-miR-935      |
| ESR2  | hsa-miR-7150     |
| ESR2  | hsa-miR-7113-5p  |
| ESR2  | hsa-miR-6882-5p  |
| ESR2  | hsa-miR-6872-3p  |
| ESR2  | hsa-miR-6871-3p  |
| ESR2  | hsa-miR-589-5p   |
| ESR2  | hsa-miR-589-3p   |
| ESR2  | hsa-miR-452-5p   |
| ESR2  | hsa-miR-375      |
| ESR2  | hsa-miR-324-5p   |
| ESR2  | hsa-miR-324-3p   |
| ESR2  | hsa-miR-3165     |
| ESR2  | hsa-miR-211-5p   |
| ESR2  | hsa-miR-203a-3p  |
| ESR2  | hsa-miR-1178-3p  |
| ESR2  | hsa-miR-1-3p     |
| ESRRA | PTGS2            |
| ESRRA | hsa-miR-1207-5p  |
| ESRRA | hsa-miR-4651     |
| ESRRA | hsa-miR-663a     |
| ESRRA | hsa-miR-937-5p   |
| ESRRA | hsa-miR-92a-3p   |
| ESRRA | hsa-miR-92a-1-5p |
| ESRRA | hsa-miR-6797-5p  |
| ESRRA | hsa-miR-3199     |
| ESRRA | hsa-miR-19b-3p   |
| ESRRA | hsa-miR-194-3p   |
| ETS1  | HIF1A            |
| ETS1  | NFKB1            |
| ETS1  | SMAD3            |
| ETS1  | STAT3            |
| ETS1  | TGFB1            |
| ETS1  | TNF              |
| ETS1  | TP53             |
| ETS1  | PTGS2            |

|      |                  |
|------|------------------|
| ETS1 | hsa-miR-142-3p   |
| ETS1 | hsa-miR-9-5p     |
| ETS1 | hsa-miR-7-5p     |
| ETS1 | hsa-miR-6815-3p  |
| ETS1 | hsa-miR-6807-5p  |
| ETS1 | hsa-miR-6807-3p  |
| ETS1 | hsa-miR-5703     |
| ETS1 | hsa-miR-5193     |
| ETS1 | hsa-miR-484      |
| ETS1 | hsa-miR-4795-5p  |
| ETS1 | hsa-miR-4738-3p  |
| ETS1 | hsa-miR-4531     |
| ETS1 | hsa-miR-449c-5p  |
| ETS1 | hsa-miR-4470     |
| ETS1 | hsa-miR-4434     |
| ETS1 | hsa-miR-365a-5p  |
| ETS1 | hsa-miR-365a-3p  |
| ETS1 | hsa-miR-320a     |
| ETS1 | hsa-miR-27a-3p   |
| ETS1 | hsa-miR-26a-5p   |
| ETS1 | hsa-miR-24-3p    |
| ETS1 | hsa-miR-21-5p    |
| ETS1 | hsa-miR-199b-5p  |
| ETS1 | hsa-miR-193b-3p  |
| ETS1 | hsa-miR-1908-5p  |
| ETS1 | hsa-miR-155-5p   |
| ETS1 | hsa-miR-150-5p   |
| ETS1 | hsa-miR-145-5p   |
| ETS2 | HIF1A            |
| ETS2 | NFKB1            |
| ETS2 | PTGS2            |
| ETS2 | SMAD3            |
| ETS2 | STAT3            |
| ETS2 | TLR4             |
| ETS2 | TP53             |
| ETS2 | hsa-miR-942-5p   |
| ETS2 | hsa-miR-7-5p     |
| ETS2 | hsa-miR-6797-5p  |
| ETS2 | hsa-miR-4659b-3p |
| ETS2 | hsa-miR-449c-5p  |

|      |                 |
|------|-----------------|
| ETS2 | hsa-miR-1322    |
| ETV1 | HIF1A           |
| ETV1 | NFKB1           |
| ETV1 | PTGS2           |
| ETV1 | STAT3           |
| ETV1 | TGFB1           |
| ETV1 | TP53            |
| ETV1 | hsa-miR-5089-3p |
| ETV1 | hsa-miR-3934-5p |
| ETV1 | hsa-miR-365a-5p |
| ETV1 | hsa-miR-365a-3p |
| ETV1 | hsa-miR-3199    |
| ETV1 | hsa-miR-195-5p  |
| ETV1 | hsa-miR-181c-5p |
| ETV1 | hsa-miR-149-5p  |
| ETV1 | hsa-miR-149-3p  |
| ETV1 | hsa-miR-124-3p  |
| ETV4 | NFKB1           |
| ETV4 | STAT3           |
| ETV4 | hsa-miR-7113-5p |
| ETV4 | hsa-miR-194-3p  |
| ETV5 | HIF1A           |
| ETV5 | PTGS2           |
| ETV5 | SMAD3           |
| ETV5 | TP53            |
| ETV5 | hsa-miR-3128    |
| ETV5 | hsa-miR-29b-3p  |
| ETV5 | hsa-miR-16-5p   |
| ETV5 | hsa-miR-15b-5p  |
| ETV5 | hsa-miR-155-5p  |
| ETV7 | HIF1A           |
| FEV  | HIF1A           |
| FEV  | hsa-miR-3074-3p |
| FEV  | hsa-miR-24-3p   |
| FOS  | HIF1A           |
| FOS  | IL6             |
| FOS  | NFKB1           |
| FOS  | PTGS2           |
| FOS  | STAT3           |
| FOS  | TGFB1           |

|     |                 |
|-----|-----------------|
| FOS | TLR4            |
| FOS | TP53            |
| FOS | hsa-let-7a-5p   |
| FOS | hsa-let-7i-5p   |
| FOS | hsa-miR-1181    |
| FOS | hsa-miR-1207-5p |
| FOS | hsa-miR-130b-3p |
| FOS | hsa-miR-144-3p  |
| FOS | hsa-miR-145-5p  |
| FOS | hsa-miR-155-5p  |
| FOS | hsa-miR-15b-5p  |
| FOS | hsa-miR-1908-5p |
| FOS | hsa-miR-199b-5p |
| FOS | hsa-miR-21-5p   |
| FOS | hsa-miR-210-3p  |
| FOS | hsa-miR-2110    |
| FOS | hsa-miR-214-3p  |
| FOS | hsa-miR-30b-5p  |
| FOS | hsa-miR-3165    |
| FOS | hsa-miR-3199    |
| FOS | hsa-miR-3609    |
| FOS | hsa-miR-4279    |
| FOS | hsa-miR-4434    |
| FOS | hsa-miR-4470    |
| FOS | hsa-miR-4510    |
| FOS | hsa-miR-4720-3p |
| FOS | hsa-miR-4736    |
| FOS | hsa-miR-4738-3p |
| FOS | hsa-miR-4748    |
| FOS | hsa-miR-4799-5p |
| FOS | hsa-miR-484     |
| FOS | hsa-miR-663a    |
| FOS | hsa-miR-942-5p  |
| FOS | hsa-miR-92b-3p  |
| FOS | hsa-miR-8052    |
| FOS | hsa-miR-7-5p    |
| FOS | hsa-miR-6872-3p |
| FOS | hsa-miR-6871-3p |
| FOS | hsa-miR-6825-5p |
| FOS | hsa-miR-6815-3p |



|     |                  |
|-----|------------------|
| FOS | hsa-miR-6809-3p  |
| FOS | hsa-miR-6806-5p  |
| FOS | hsa-miR-6797-5p  |
| FOS | hsa-miR-6780b-5p |
| FOS | hsa-miR-6762-3p  |
| FOS | hsa-miR-660-3p   |
| FOS | hsa-miR-6133     |
| FOS | hsa-miR-589-5p   |
| FOS | hsa-miR-589-3p   |
| FOS | hsa-miR-5703     |
| FOS | hsa-miR-5702     |
| FOS | hsa-miR-548g-3p  |
| FOS | hsa-miR-5197-5p  |
| FOS | hsa-miR-4795-5p  |
| FOS | hsa-miR-4694-3p  |
| FOS | hsa-miR-4651     |
| FOS | hsa-miR-4531     |
| FOS | hsa-miR-449c-5p  |
| FOS | hsa-miR-4438     |
| FOS | hsa-miR-4418     |
| FOS | hsa-miR-4290     |
| FOS | hsa-miR-4282     |
| FOS | hsa-miR-3934-5p  |
| FOS | hsa-miR-375      |
| FOS | hsa-miR-3668     |
| FOS | hsa-miR-365a-5p  |
| FOS | hsa-miR-365a-3p  |
| FOS | hsa-miR-34b-5p   |
| FOS | hsa-miR-3128     |
| FOS | hsa-miR-30e-5p   |
| FOS | hsa-miR-30a-5p   |
| FOS | hsa-miR-27a-3p   |
| FOS | hsa-miR-26a-5p   |
| FOS | hsa-miR-24-3p    |
| FOS | hsa-miR-211-5p   |
| FOS | hsa-miR-203a-3p  |
| FOS | hsa-miR-199a-5p  |
| FOS | hsa-miR-199a-3p  |
| FOS | hsa-miR-185-5p   |
| FOS | hsa-miR-16-5p    |

|       |                 |
|-------|-----------------|
| FOS   | hsa-miR-128-3p  |
| FOS   | hsa-miR-125b-5p |
| FOS   | hsa-miR-107     |
| FOSL1 | TP53            |
| FOSL1 | hsa-let-7a-5p   |
| FOSL1 | hsa-miR-1207-5p |
| FOSL1 | hsa-miR-1288-5p |
| FOSL1 | hsa-miR-142-3p  |
| FOSL1 | hsa-miR-155-5p  |
| FOSL1 | hsa-miR-21-5p   |
| FOSL1 | hsa-miR-22-3p   |
| FOSL1 | hsa-miR-30b-5p  |
| FOSL1 | hsa-miR-4736    |
| FOSL1 | hsa-miR-4738-3p |
| FOSL1 | hsa-miR-4799-5p |
| FOSL1 | hsa-miR-484     |
| FOSL1 | hsa-miR-618     |
| FOSL1 | hsa-miR-663a    |
| FOSL1 | hsa-miR-210-3p  |
| FOSL1 | hsa-miR-194-3p  |
| FOSL1 | hsa-miR-100-5p  |
| FOSL2 | HIF1A           |
| FOSL2 | IL6             |
| FOSL2 | PTGS2           |
| FOSL2 | SMAD3           |
| FOSL2 | STAT3           |
| FOSL2 | TGFB1           |
| FOSL2 | TP53            |
| FOSL2 | hsa-let-7a-5p   |
| FOSL2 | hsa-miR-1288-5p |
| FOSL2 | hsa-miR-155-5p  |
| FOSL2 | hsa-miR-1908-5p |
| FOSL2 | hsa-miR-21-5p   |
| FOSL2 | hsa-miR-320a    |
| FOSL2 | hsa-miR-4434    |
| FOSL2 | hsa-miR-4470    |
| FOSL2 | hsa-miR-663a    |
| FOSL2 | hsa-miR-942-5p  |
| FOSL2 | hsa-miR-92b-3p  |
| FOSL2 | hsa-miR-8052    |

|       |                  |
|-------|------------------|
| FOSL2 | hsa-miR-7-5p     |
| FOSL2 | hsa-miR-6875-3p  |
| FOSL2 | hsa-miR-6809-3p  |
| FOSL2 | hsa-miR-6797-5p  |
| FOSL2 | hsa-miR-6789-3p  |
| FOSL2 | hsa-miR-6511a-5p |
| FOSL2 | hsa-miR-6133     |
| FOSL2 | hsa-miR-589-5p   |
| FOSL2 | hsa-miR-589-3p   |
| FOSL2 | hsa-miR-5703     |
| FOSL2 | hsa-miR-5692a    |
| FOSL2 | hsa-miR-548g-3p  |
| FOSL2 | hsa-miR-5197-5p  |
| FOSL2 | hsa-miR-484      |
| FOSL2 | hsa-miR-4738-3p  |
| FOSL2 | hsa-miR-4728-5p  |
| FOSL2 | hsa-miR-4531     |
| FOSL2 | hsa-miR-4516     |
| FOSL2 | hsa-miR-4510     |
| FOSL2 | hsa-miR-449c-5p  |
| FOSL2 | hsa-miR-4441     |
| FOSL2 | hsa-miR-4282     |
| FOSL2 | hsa-miR-365a-5p  |
| FOSL2 | hsa-miR-365a-3p  |
| FOSL2 | hsa-miR-3658     |
| FOSL2 | hsa-miR-33a-5p   |
| FOSL2 | hsa-miR-3074-3p  |
| FOSL2 | hsa-miR-27a-3p   |
| FOSL2 | hsa-miR-24-3p    |
| FOSL2 | hsa-miR-22-3p    |
| FOSL2 | hsa-miR-2110     |
| FOSL2 | hsa-miR-211-5p   |
| FOSL2 | hsa-miR-199a-5p  |
| FOSL2 | hsa-miR-199a-3p  |
| FOSL2 | hsa-miR-150-5p   |
| FOSL2 | hsa-miR-132-3p   |
| FOSL2 | hsa-miR-128-3p   |
| FOSL2 | hsa-miR-1181     |
| FOSL2 | hsa-let-7i-5p    |
| FOXA1 | IL2              |

|       |                  |
|-------|------------------|
| FOXA1 | IL6              |
| FOXA1 | NFKB1            |
| FOXA1 | TGFB1            |
| FOXA1 | TP53             |
| FOXA1 | HIF1A            |
| FOXA1 | STAT3            |
| FOXA1 | SMAD3            |
| FOXA1 | hsa-let-7a-5p    |
| FOXA1 | hsa-miR-1178-3p  |
| FOXA1 | hsa-miR-1296-3p  |
| FOXA1 | hsa-miR-132-3p   |
| FOXA1 | hsa-miR-139-5p   |
| FOXA1 | hsa-miR-144-3p   |
| FOXA1 | hsa-miR-150-5p   |
| FOXA1 | hsa-miR-153-5p   |
| FOXA1 | hsa-miR-2110     |
| FOXA1 | hsa-miR-214-3p   |
| FOXA1 | hsa-miR-30a-5p   |
| FOXA1 | hsa-miR-30b-5p   |
| FOXA1 | hsa-miR-30e-5p   |
| FOXA1 | hsa-miR-375      |
| FOXA1 | hsa-miR-4470     |
| FOXA1 | hsa-miR-4651     |
| FOXA1 | hsa-miR-484      |
| FOXA1 | hsa-miR-491-5p   |
| FOXA1 | hsa-miR-612      |
| FOXA1 | hsa-miR-618      |
| FOXA1 | hsa-miR-663a     |
| FOXA1 | hsa-miR-7-5p     |
| FOXA1 | hsa-miR-937-5p   |
| FOXA1 | hsa-miR-92b-3p   |
| FOXA1 | hsa-miR-92a-3p   |
| FOXA1 | hsa-miR-92a-2-5p |
| FOXA1 | hsa-miR-92a-1-5p |
| FOXA1 | hsa-miR-9-5p     |
| FOXA1 | hsa-miR-874-3p   |
| FOXA1 | hsa-miR-744-5p   |
| FOXA1 | hsa-miR-7158-5p  |
| FOXA1 | hsa-miR-7150     |
| FOXA1 | hsa-miR-6872-3p  |

|       |                  |
|-------|------------------|
| FOXA1 | hsa-miR-6825-5p  |
| FOXA1 | hsa-miR-6815-3p  |
| FOXA1 | hsa-miR-6809-3p  |
| FOXA1 | hsa-miR-6803-5p  |
| FOXA1 | hsa-miR-6797-5p  |
| FOXA1 | hsa-miR-6789-3p  |
| FOXA1 | hsa-miR-6755-5p  |
| FOXA1 | hsa-miR-6731-5p  |
| FOXA1 | hsa-miR-633      |
| FOXA1 | hsa-miR-630      |
| FOXA1 | hsa-miR-6133     |
| FOXA1 | hsa-miR-608      |
| FOXA1 | hsa-miR-589-5p   |
| FOXA1 | hsa-miR-589-3p   |
| FOXA1 | hsa-miR-576-3p   |
| FOXA1 | hsa-miR-5703     |
| FOXA1 | hsa-miR-5702     |
| FOXA1 | hsa-miR-5692a    |
| FOXA1 | hsa-miR-5681b    |
| FOXA1 | hsa-miR-5681a    |
| FOXA1 | hsa-miR-548n     |
| FOXA1 | hsa-miR-548ah-5p |
| FOXA1 | hsa-miR-5197-5p  |
| FOXA1 | hsa-miR-5089-3p  |
| FOXA1 | hsa-miR-4804-3p  |
| FOXA1 | hsa-miR-4799-5p  |
| FOXA1 | hsa-miR-4795-5p  |
| FOXA1 | hsa-miR-4742-3p  |
| FOXA1 | hsa-miR-4738-3p  |
| FOXA1 | hsa-miR-4736     |
| FOXA1 | hsa-miR-4720-3p  |
| FOXA1 | hsa-miR-454-3p   |
| FOXA1 | hsa-miR-4531     |
| FOXA1 | hsa-miR-452-5p   |
| FOXA1 | hsa-miR-4516     |
| FOXA1 | hsa-miR-4510     |
| FOXA1 | hsa-miR-449c-5p  |
| FOXA1 | hsa-miR-4499     |
| FOXA1 | hsa-miR-4487     |
| FOXA1 | hsa-miR-4434     |

|       |                 |
|-------|-----------------|
| FOXA1 | hsa-miR-4419a   |
| FOXA1 | hsa-miR-4290    |
| FOXA1 | hsa-miR-4282    |
| FOXA1 | hsa-miR-4279    |
| FOXA1 | hsa-miR-4270    |
| FOXA1 | hsa-miR-3934-5p |
| FOXA1 | hsa-miR-3662    |
| FOXA1 | hsa-miR-365a-5p |
| FOXA1 | hsa-miR-365a-3p |
| FOXA1 | hsa-miR-3609    |
| FOXA1 | hsa-miR-34b-5p  |
| FOXA1 | hsa-miR-34a-5p  |
| FOXA1 | hsa-miR-335-5p  |
| FOXA1 | hsa-miR-324-5p  |
| FOXA1 | hsa-miR-324-3p  |
| FOXA1 | hsa-miR-320a    |
| FOXA1 | hsa-miR-3199    |
| FOXA1 | hsa-miR-3165    |
| FOXA1 | hsa-miR-3160-3p |
| FOXA1 | hsa-miR-31-5p   |
| FOXA1 | hsa-miR-30d-5p  |
| FOXA1 | hsa-miR-30c-5p  |
| FOXA1 | hsa-miR-29b-3p  |
| FOXA1 | hsa-miR-296-3p  |
| FOXA1 | hsa-miR-27a-3p  |
| FOXA1 | hsa-miR-24-3p   |
| FOXA1 | hsa-miR-222-3p  |
| FOXA1 | hsa-miR-22-3p   |
| FOXA1 | hsa-miR-217     |
| FOXA1 | hsa-miR-211-5p  |
| FOXA1 | hsa-miR-210-3p  |
| FOXA1 | hsa-miR-21-5p   |
| FOXA1 | hsa-miR-20b-5p  |
| FOXA1 | hsa-miR-20a-5p  |
| FOXA1 | hsa-miR-203a-3p |
| FOXA1 | hsa-miR-19b-3p  |
| FOXA1 | hsa-miR-19a-3p  |
| FOXA1 | hsa-miR-199b-5p |
| FOXA1 | hsa-miR-193b-3p |
| FOXA1 | hsa-miR-1908-5p |

|       |                 |
|-------|-----------------|
| FOXA1 | hsa-miR-18b-5p  |
| FOXA1 | hsa-miR-185-5p  |
| FOXA1 | hsa-miR-181c-5p |
| FOXA1 | hsa-miR-181a-5p |
| FOXA1 | hsa-miR-16-5p   |
| FOXA1 | hsa-miR-15b-5p  |
| FOXA1 | hsa-miR-15a-5p  |
| FOXA1 | hsa-miR-155-5p  |
| FOXA1 | hsa-miR-149-5p  |
| FOXA1 | hsa-miR-149-3p  |
| FOXA1 | hsa-miR-1468-3p |
| FOXA1 | hsa-miR-142-3p  |
| FOXA1 | hsa-miR-1322    |
| FOXA1 | hsa-miR-1285-3p |
| FOXA1 | hsa-miR-128-3p  |
| FOXA1 | hsa-miR-1273f   |
| FOXA1 | hsa-miR-1249-5p |
| FOXA1 | hsa-miR-122-5p  |
| FOXA1 | hsa-miR-1207-5p |
| FOXA1 | hsa-miR-1181    |
| FOXA1 | hsa-miR-106a-5p |
| FOXA1 | hsa-miR-106a-3p |
| FOXA1 | hsa-miR-101-3p  |
| FOXA1 | hsa-miR-100-5p  |
| FOXA1 | hsa-miR-1-3p    |
| FOXA1 | hsa-let-7i-5p   |
| FOXA1 | hsa-let-7b-5p   |
| FOXA2 | IL6             |
| FOXA2 | PTGS2           |
| FOXA2 | SMAD3           |
| FOXA2 | STAT3           |
| FOXA2 | TGFB1           |
| FOXA2 | TP53            |
| FOXA2 | hsa-miR-2110    |
| FOXA2 | hsa-miR-24-3p   |
| FOXA2 | hsa-miR-30a-5p  |
| FOXA2 | hsa-miR-375     |
| FOXA2 | hsa-miR-663a    |
| FOXA2 | hsa-miR-92b-3p  |
| FOXA2 | hsa-miR-9-5p    |

|       |                 |
|-------|-----------------|
| FOXA2 | hsa-miR-7-5p    |
| FOXA2 | hsa-miR-6893-5p |
| FOXA2 | hsa-miR-6825-5p |
| FOXA2 | hsa-miR-6815-3p |
| FOXA2 | hsa-miR-6809-3p |
| FOXA2 | hsa-miR-6808-5p |
| FOXA2 | hsa-miR-6789-3p |
| FOXA2 | hsa-miR-6766-5p |
| FOXA2 | hsa-miR-630     |
| FOXA2 | hsa-miR-6129    |
| FOXA2 | hsa-miR-612     |
| FOXA2 | hsa-miR-608     |
| FOXA2 | hsa-miR-5703    |
| FOXA2 | hsa-miR-484     |
| FOXA2 | hsa-miR-4804-3p |
| FOXA2 | hsa-miR-4795-5p |
| FOXA2 | hsa-miR-4684-5p |
| FOXA2 | hsa-miR-4651    |
| FOXA2 | hsa-miR-454-3p  |
| FOXA2 | hsa-miR-4470    |
| FOXA2 | hsa-miR-4434    |
| FOXA2 | hsa-miR-320a    |
| FOXA2 | hsa-miR-30c-5p  |
| FOXA2 | hsa-miR-30b-5p  |
| FOXA2 | hsa-miR-3074-3p |
| FOXA2 | hsa-miR-27a-3p  |
| FOXA2 | hsa-miR-22-3p   |
| FOXA2 | hsa-miR-21-5p   |
| FOXA2 | hsa-miR-199b-5p |
| FOXA2 | hsa-miR-1908-5p |
| FOXA2 | hsa-miR-185-5p  |
| FOXA2 | hsa-miR-145-5p  |
| FOXA2 | hsa-miR-132-3p  |
| FOXA2 | hsa-miR-1273f   |
| FOXA2 | hsa-miR-1249-5p |
| FOXA2 | hsa-miR-122-5p  |
| FOXA2 | hsa-miR-1207-5p |
| FOXA2 | hsa-miR-107     |
| FOXA2 | hsa-miR-101-3p  |
| FOXA2 | hsa-let-7i-5p   |



|       |                 |
|-------|-----------------|
| FOXA2 | hsa-let-7a-5p   |
| FOXD2 | HIF1A           |
| FOXD2 | NFKB1           |
| FOXD2 | SMAD3           |
| FOXD2 | hsa-miR-6872-3p |
| FOXD2 | hsa-miR-5094    |
| FOXD2 | hsa-miR-26a-5p  |
| FOXD2 | hsa-miR-210-3p  |
| FOXD2 | hsa-miR-1273f   |
| FOXG1 | HIF1A           |
| FOXG1 | SMAD3           |
| FOXG1 | TP53            |
| FOXG1 | hsa-miR-92b-3p  |
| FOXG1 | hsa-miR-5702    |
| FOXG1 | hsa-miR-4651    |
| FOXG1 | hsa-miR-29b-3p  |
| FOXG1 | hsa-miR-20a-5p  |
| FOXG1 | hsa-miR-19b-3p  |
| FOXG1 | hsa-miR-19a-3p  |
| FOXG1 | hsa-miR-18a-5p  |
| FOXG1 | hsa-miR-18a-3p  |
| FOXG1 | hsa-miR-17-5p   |
| FOXG1 | hsa-miR-150-5p  |
| FOXH1 | PTGS2           |
| FOXH1 | SMAD3           |
| FOXH1 | hsa-miR-9-5p    |
| FOXH1 | hsa-miR-7151-3p |
| FOXH1 | hsa-miR-7-5p    |
| FOXH1 | hsa-miR-6815-3p |
| FOXH1 | hsa-miR-4768-5p |
| FOXH1 | hsa-miR-3658    |
| FOXH1 | hsa-miR-3529-3p |
| FOXH1 | hsa-miR-145-5p  |
| FOXH1 | hsa-miR-1249-5p |
| FOXH1 | hsa-miR-122-5p  |
| FOXM1 | PTGS2           |
| FOXM1 | STAT3           |
| FOXM1 | TP53            |
| FOXM1 | HIF1A           |
| FOXM1 | IL6             |

|       |                 |
|-------|-----------------|
| FOXM1 | NFKB1           |
| FOXM1 | TGFB1           |
| FOXM1 | TNF             |
| FOXM1 | hsa-miR-130a-3p |
| FOXM1 | hsa-miR-130b-3p |
| FOXM1 | hsa-miR-1908-5p |
| FOXM1 | hsa-miR-21-5p   |
| FOXM1 | hsa-miR-214-3p  |
| FOXM1 | hsa-miR-30a-5p  |
| FOXM1 | hsa-miR-4279    |
| FOXM1 | hsa-miR-4651    |
| FOXM1 | hsa-miR-484     |
| FOXM1 | hsa-miR-548g-3p |
| FOXM1 | hsa-miR-92b-3p  |
| FOXM1 | hsa-miR-99a-5p  |
| FOXM1 | hsa-miR-93-5p   |
| FOXM1 | hsa-miR-9-5p    |
| FOXM1 | hsa-miR-7-5p    |
| FOXM1 | hsa-miR-6875-3p |
| FOXM1 | hsa-miR-6872-3p |
| FOXM1 | hsa-miR-6825-5p |
| FOXM1 | hsa-miR-6789-3p |
| FOXM1 | hsa-miR-663a    |
| FOXM1 | hsa-miR-625-3p  |
| FOXM1 | hsa-miR-612     |
| FOXM1 | hsa-miR-589-5p  |
| FOXM1 | hsa-miR-589-3p  |
| FOXM1 | hsa-miR-5703    |
| FOXM1 | hsa-miR-5193    |
| FOXM1 | hsa-miR-4799-5p |
| FOXM1 | hsa-miR-4795-5p |
| FOXM1 | hsa-miR-4738-3p |
| FOXM1 | hsa-miR-4736    |
| FOXM1 | hsa-miR-454-3p  |
| FOXM1 | hsa-miR-4531    |
| FOXM1 | hsa-miR-449c-5p |
| FOXM1 | hsa-miR-4487    |
| FOXM1 | hsa-miR-4470    |
| FOXM1 | hsa-miR-4434    |
| FOXM1 | hsa-miR-424-5p  |

|       |                 |
|-------|-----------------|
| FOXM1 | hsa-miR-3662    |
| FOXM1 | hsa-miR-365a-5p |
| FOXM1 | hsa-miR-365a-3p |
| FOXM1 | hsa-miR-324-5p  |
| FOXM1 | hsa-miR-324-3p  |
| FOXM1 | hsa-miR-320a    |
| FOXM1 | hsa-miR-3165    |
| FOXM1 | hsa-miR-30d-5p  |
| FOXM1 | hsa-miR-296-3p  |
| FOXM1 | hsa-miR-27a-3p  |
| FOXM1 | hsa-miR-25-3p   |
| FOXM1 | hsa-miR-24-3p   |
| FOXM1 | hsa-miR-22-3p   |
| FOXM1 | hsa-miR-2110    |
| FOXM1 | hsa-miR-211-5p  |
| FOXM1 | hsa-miR-210-3p  |
| FOXM1 | hsa-miR-194-3p  |
| FOXM1 | hsa-miR-1909-3p |
| FOXM1 | hsa-miR-181c-5p |
| FOXM1 | hsa-miR-155-5p  |
| FOXM1 | hsa-miR-150-5p  |
| FOXM1 | hsa-miR-145-5p  |
| FOXM1 | hsa-miR-142-3p  |
| FOXM1 | hsa-miR-132-3p  |
| FOXM1 | hsa-miR-1288-5p |
| FOXM1 | hsa-miR-128-3p  |
| FOXM1 | hsa-miR-124-3p  |
| FOXM1 | hsa-miR-1207-5p |
| FOXM1 | hsa-miR-1181    |
| FOXM1 | hsa-miR-106b-5p |
| FOXM1 | hsa-miR-106b-3p |
| FOXM1 | hsa-let-7i-5p   |
| FOXM1 | hsa-let-7a-5p   |
| FOXO3 | PTGS2           |
| FOXO3 | STAT3           |
| FOXO3 | hsa-miR-1178-3p |
| FOXO3 | hsa-miR-139-5p  |
| FOXO3 | hsa-miR-30d-5p  |
| FOXP1 | HIF1A           |
| FOXP1 | NFKB1           |

|       |                 |
|-------|-----------------|
| FOXP1 | SMAD3           |
| FOXP1 | STAT3           |
| FOXP1 | TGFB1           |
| FOXP1 | TP53            |
| FOXP1 | hsa-miR-7158-5p |
| FOXP1 | hsa-miR-5702    |
| FOXP1 | hsa-miR-4804-3p |
| FOXP1 | hsa-miR-375     |
| FOXP1 | hsa-miR-30b-5p  |
| FOXP1 | hsa-miR-29b-3p  |
| FOXP1 | hsa-miR-20a-5p  |
| FOXP1 | hsa-miR-19b-3p  |
| FOXP1 | hsa-miR-19a-3p  |
| FOXP1 | hsa-miR-194-3p  |
| FOXP1 | hsa-miR-18a-5p  |
| FOXP1 | hsa-miR-18a-3p  |
| FOXP1 | hsa-miR-181c-5p |
| FOXP1 | hsa-miR-17-5p   |
| FOXP1 | hsa-miR-149-5p  |
| FOXP1 | hsa-miR-149-3p  |
| FOXP2 | HIF1A           |
| FOXP2 | NFKB1           |
| FOXP2 | PTGS2           |
| FOXP2 | SMAD3           |
| FOXP2 | STAT3           |
| FOXP2 | TGFB1           |
| FOXP2 | TP53            |
| FOXP2 | hsa-miR-100-5p  |
| FOXP2 | hsa-miR-139-5p  |
| FOXP2 | hsa-miR-151a-3p |
| FOXP2 | hsa-miR-1908-5p |
| FOXP2 | hsa-miR-612     |
| FOXP2 | hsa-miR-8085    |
| FOXP2 | hsa-miR-6872-3p |
| FOXP2 | hsa-miR-6825-5p |
| FOXP2 | hsa-miR-6809-3p |
| FOXP2 | hsa-miR-5703    |
| FOXP2 | hsa-miR-5193    |
| FOXP2 | hsa-miR-4799-5p |
| FOXP2 | hsa-miR-4748    |

|       |                 |
|-------|-----------------|
| FOXP2 | hsa-miR-27a-3p  |
| FOXP2 | hsa-miR-24-3p   |
| FOXP2 | hsa-miR-214-3p  |
| FOXP2 | hsa-miR-210-3p  |
| FOXP2 | hsa-miR-199b-5p |
| FOXP2 | hsa-miR-199a-5p |
| FOXP2 | hsa-miR-199a-3p |
| FOXP2 | hsa-miR-150-5p  |
| FOXP2 | hsa-miR-124-3p  |
| FOXP3 | IL2             |
| GABPA | HIF1A           |
| GABPA | NFKB1           |
| GABPA | PTGS2           |
| GABPA | SMAD3           |
| GABPA | STAT3           |
| GABPA | TGFB1           |
| GABPA | TP53            |
| GABPA | hsa-miR-1181    |
| GABPA | hsa-miR-124-3p  |
| GABPA | hsa-miR-2682-5p |
| GABPA | hsa-miR-320a    |
| GABPA | hsa-miR-4736    |
| GABPA | hsa-miR-484     |
| GABPA | hsa-miR-942-5p  |
| GABPA | hsa-miR-92b-3p  |
| GABPA | hsa-miR-9-5p    |
| GABPA | hsa-miR-8085    |
| GABPA | hsa-miR-7150    |
| GABPA | hsa-miR-7-5p    |
| GABPA | hsa-miR-6872-3p |
| GABPA | hsa-miR-6825-5p |
| GABPA | hsa-miR-6815-3p |
| GABPA | hsa-miR-6789-3p |
| GABPA | hsa-miR-6785-5p |
| GABPA | hsa-miR-663a    |
| GABPA | hsa-miR-5703    |
| GABPA | hsa-miR-5193    |
| GABPA | hsa-miR-4738-3p |
| GABPA | hsa-miR-4697-3p |
| GABPA | hsa-miR-4651    |

|       |                 |
|-------|-----------------|
| GABPA | hsa-miR-4516    |
| GABPA | hsa-miR-4470    |
| GABPA | hsa-miR-4441    |
| GABPA | hsa-miR-375     |
| GABPA | hsa-miR-371b-3p |
| GABPA | hsa-miR-365a-5p |
| GABPA | hsa-miR-365a-3p |
| GABPA | hsa-miR-3121-3p |
| GABPA | hsa-miR-27a-3p  |
| GABPA | hsa-miR-24-3p   |
| GABPA | hsa-miR-22-3p   |
| GABPA | hsa-miR-210-3p  |
| GABPA | hsa-miR-203a-3p |
| GABPA | hsa-miR-200a-3p |
| GABPA | hsa-miR-199b-5p |
| GABPA | hsa-miR-195-5p  |
| GABPA | hsa-miR-150-5p  |
| GABPA | hsa-miR-149-5p  |
| GABPA | hsa-miR-149-3p  |
| GABPA | hsa-miR-145-5p  |
| GABPA | hsa-miR-142-3p  |
| GABPA | hsa-miR-138-5p  |
| GABPA | hsa-miR-137     |
| GABPA | hsa-miR-132-3p  |
| GABPA | hsa-let-7i-5p   |
| GATA1 | NFKB1           |
| GATA1 | PTGS2           |
| GATA1 | STAT3           |
| GATA1 | TNF             |
| GATA1 | TP53            |
| GATA1 | HIF1A           |
| GATA1 | TLR4            |
| GATA1 | hsa-miR-1207-5p |
| GATA1 | hsa-miR-1234-3p |
| GATA1 | hsa-miR-132-3p  |
| GATA1 | hsa-miR-142-3p  |
| GATA1 | hsa-miR-144-3p  |
| GATA1 | hsa-miR-145-5p  |
| GATA1 | hsa-miR-146a-5p |
| GATA1 | hsa-miR-187-3p  |

|       |                  |
|-------|------------------|
| GATA1 | hsa-miR-194-3p   |
| GATA1 | hsa-miR-21-5p    |
| GATA1 | hsa-miR-223-3p   |
| GATA1 | hsa-miR-30b-5p   |
| GATA1 | hsa-miR-335-5p   |
| GATA1 | hsa-miR-3662     |
| GATA1 | hsa-miR-4271     |
| GATA1 | hsa-miR-4441     |
| GATA1 | hsa-miR-4651     |
| GATA1 | hsa-miR-4659a-3p |
| GATA1 | hsa-miR-4659b-3p |
| GATA1 | hsa-miR-4736     |
| GATA1 | hsa-miR-663a     |
| GATA1 | hsa-miR-935      |
| GATA1 | hsa-miR-940      |
| GATA1 | hsa-miR-92a-3p   |
| GATA1 | hsa-miR-92a-1-5p |
| GATA1 | hsa-miR-9-5p     |
| GATA1 | hsa-miR-889-3p   |
| GATA1 | hsa-miR-6835-5p  |
| GATA1 | hsa-miR-6825-5p  |
| GATA1 | hsa-miR-6815-3p  |
| GATA1 | hsa-miR-6809-3p  |
| GATA1 | hsa-miR-6797-5p  |
| GATA1 | hsa-miR-6785-5p  |
| GATA1 | hsa-miR-6762-3p  |
| GATA1 | hsa-miR-6760-5p  |
| GATA1 | hsa-miR-6752-5p  |
| GATA1 | hsa-miR-625-3p   |
| GATA1 | hsa-miR-612      |
| GATA1 | hsa-miR-589-5p   |
| GATA1 | hsa-miR-589-3p   |
| GATA1 | hsa-miR-5703     |
| GATA1 | hsa-miR-484      |
| GATA1 | hsa-miR-4720-3p  |
| GATA1 | hsa-miR-34b-5p   |
| GATA1 | hsa-miR-33a-5p   |
| GATA1 | hsa-miR-329-5p   |
| GATA1 | hsa-miR-2110     |
| GATA1 | hsa-miR-20a-5p   |

|       |                 |
|-------|-----------------|
| GATA1 | hsa-miR-19b-3p  |
| GATA1 | hsa-miR-19a-3p  |
| GATA1 | hsa-miR-199b-5p |
| GATA1 | hsa-miR-1910-3p |
| GATA1 | hsa-miR-1908-5p |
| GATA1 | hsa-miR-18a-5p  |
| GATA1 | hsa-miR-18a-3p  |
| GATA1 | hsa-miR-17-5p   |
| GATA1 | hsa-miR-155-5p  |
| GATA1 | hsa-miR-153-5p  |
| GATA1 | hsa-miR-143-3p  |
| GATA1 | hsa-miR-138-5p  |
| GATA1 | hsa-miR-124-3p  |
| GATA2 | IL10            |
| GATA2 | IL6             |
| GATA2 | NFKB1           |
| GATA2 | PTGS2           |
| GATA2 | SMAD3           |
| GATA2 | STAT3           |
| GATA2 | TLR4            |
| GATA2 | TNF             |
| GATA2 | TP53            |
| GATA2 | hsa-let-7a-5p   |
| GATA2 | hsa-let-7i-5p   |
| GATA2 | hsa-miR-101-3p  |
| GATA2 | hsa-miR-1207-5p |
| GATA2 | hsa-miR-1234-3p |
| GATA2 | hsa-miR-124-3p  |
| GATA2 | hsa-miR-1288-5p |
| GATA2 | hsa-miR-132-3p  |
| GATA2 | hsa-miR-1322    |
| GATA2 | hsa-miR-142-3p  |
| GATA2 | hsa-miR-143-3p  |
| GATA2 | hsa-miR-145-5p  |
| GATA2 | hsa-miR-146a-5p |
| GATA2 | hsa-miR-150-5p  |
| GATA2 | hsa-miR-155-5p  |
| GATA2 | hsa-miR-17-5p   |
| GATA2 | hsa-miR-18a-3p  |
| GATA2 | hsa-miR-18a-5p  |



|       |                 |
|-------|-----------------|
| GATA2 | hsa-miR-1908-5p |
| GATA2 | hsa-miR-19a-3p  |
| GATA2 | hsa-miR-20a-5p  |
| GATA2 | hsa-miR-223-3p  |
| GATA2 | hsa-miR-30a-5p  |
| GATA2 | hsa-miR-3165    |
| GATA2 | hsa-miR-324-3p  |
| GATA2 | hsa-miR-324-5p  |
| GATA2 | hsa-miR-335-5p  |
| GATA2 | hsa-miR-3658    |
| GATA2 | hsa-miR-3662    |
| GATA2 | hsa-miR-4441    |
| GATA2 | hsa-miR-4694-3p |
| GATA2 | hsa-miR-4698    |
| GATA2 | hsa-miR-4736    |
| GATA2 | hsa-miR-4738-3p |
| GATA2 | hsa-miR-630     |
| GATA2 | hsa-miR-663a    |
| GATA2 | hsa-miR-9-5p    |
| GATA2 | hsa-miR-922     |
| GATA2 | hsa-miR-935     |
| GATA2 | hsa-miR-942-5p  |
| GATA2 | hsa-miR-92b-3p  |
| GATA2 | hsa-miR-558     |
| GATA2 | hsa-miR-5196-3p |
| GATA2 | hsa-miR-4650-5p |
| GATA2 | hsa-miR-3934-5p |
| GATA2 | hsa-miR-22-3p   |
| GATA2 | hsa-miR-181c-5p |
| GATA2 | hsa-miR-144-3p  |
| GATA2 | hsa-miR-130b-3p |
| GATA3 | HIF1A           |
| GATA3 | NFKB1           |
| GATA3 | PTGS2           |
| GATA3 | STAT3           |
| GATA3 | TGFB1           |
| GATA3 | TLR4            |
| GATA3 | TNF             |
| GATA3 | TP53            |
| GATA3 | hsa-let-7a-5p   |

|       |                 |
|-------|-----------------|
| GATA3 | hsa-let-7c-5p   |
| GATA3 | hsa-let-7i-5p   |
| GATA3 | hsa-miR-1207-5p |
| GATA3 | hsa-miR-128-3p  |
| GATA3 | hsa-miR-1288-5p |
| GATA3 | hsa-miR-1322    |
| GATA3 | hsa-miR-142-3p  |
| GATA3 | hsa-miR-149-3p  |
| GATA3 | hsa-miR-149-5p  |
| GATA3 | hsa-miR-155-5p  |
| GATA3 | hsa-miR-17-5p   |
| GATA3 | hsa-miR-181c-5p |
| GATA3 | hsa-miR-18a-3p  |
| GATA3 | hsa-miR-18a-5p  |
| GATA3 | hsa-miR-19a-3p  |
| GATA3 | hsa-miR-20a-5p  |
| GATA3 | hsa-miR-21-5p   |
| GATA3 | hsa-miR-211-5p  |
| GATA3 | hsa-miR-214-3p  |
| GATA3 | hsa-miR-24-3p   |
| GATA3 | hsa-miR-27a-3p  |
| GATA3 | hsa-miR-30a-5p  |
| GATA3 | hsa-miR-30b-5p  |
| GATA3 | hsa-miR-324-3p  |
| GATA3 | hsa-miR-324-5p  |
| GATA3 | hsa-miR-3609    |
| GATA3 | hsa-miR-3658    |
| GATA3 | hsa-miR-365a-3p |
| GATA3 | hsa-miR-365a-5p |
| GATA3 | hsa-miR-365b-5p |
| GATA3 | hsa-miR-3668    |
| GATA3 | hsa-miR-375     |
| GATA3 | hsa-miR-4271    |
| GATA3 | hsa-miR-4470    |
| GATA3 | hsa-miR-4650-5p |
| GATA3 | hsa-miR-4651    |
| GATA3 | hsa-miR-4698    |
| GATA3 | hsa-miR-4720-3p |
| GATA3 | hsa-miR-4725-3p |
| GATA3 | hsa-miR-4736    |

|       |                  |
|-------|------------------|
| GATA3 | hsa-miR-4738-3p  |
| GATA3 | hsa-miR-548g-3p  |
| GATA3 | hsa-miR-558      |
| GATA3 | hsa-miR-605-5p   |
| GATA3 | hsa-miR-630      |
| GATA3 | hsa-miR-663a     |
| GATA3 | hsa-miR-9-5p     |
| GATA3 | hsa-miR-937-5p   |
| GATA3 | hsa-miR-942-5p   |
| GATA3 | hsa-miR-92b-3p   |
| GATA3 | hsa-miR-92a-3p   |
| GATA3 | hsa-miR-92a-1-5p |
| GATA3 | hsa-miR-7-5p     |
| GATA3 | hsa-miR-6803-5p  |
| GATA3 | hsa-miR-6797-5p  |
| GATA3 | hsa-miR-6789-3p  |
| GATA3 | hsa-miR-6762-3p  |
| GATA3 | hsa-miR-6756-5p  |
| GATA3 | hsa-miR-633      |
| GATA3 | hsa-miR-6133     |
| GATA3 | hsa-miR-5703     |
| GATA3 | hsa-miR-548n     |
| GATA3 | hsa-miR-5197-5p  |
| GATA3 | hsa-miR-4742-3p  |
| GATA3 | hsa-miR-4644     |
| GATA3 | hsa-miR-4487     |
| GATA3 | hsa-miR-4279     |
| GATA3 | hsa-miR-320a     |
| GATA3 | hsa-miR-210-3p   |
| GATA3 | hsa-miR-203a-3p  |
| GATA3 | hsa-miR-19b-3p   |
| GATA3 | hsa-miR-199a-5p  |
| GATA3 | hsa-miR-199a-3p  |
| GATA3 | hsa-miR-1972     |
| GATA3 | hsa-miR-1908-5p  |
| GATA3 | hsa-miR-181a-5p  |
| GATA3 | hsa-miR-150-5p   |
| GATA3 | hsa-miR-132-3p   |
| GATA3 | hsa-miR-1285-3p  |
| GATA3 | hsa-miR-1264     |

|       |                  |
|-------|------------------|
| GATA3 | hsa-miR-125b-5p  |
| GATA3 | hsa-miR-1249-5p  |
| GATA4 | HIF1A            |
| GATA4 | IL6              |
| GATA4 | NFKB1            |
| GATA4 | PTGS2            |
| GATA4 | SMAD3            |
| GATA4 | STAT3            |
| GATA4 | TGFB1            |
| GATA4 | TLR4             |
| GATA4 | TNF              |
| GATA4 | TP53             |
| GATA4 | hsa-miR-1288-5p  |
| GATA4 | hsa-miR-138-2-3p |
| GATA4 | hsa-miR-138-5p   |
| GATA4 | hsa-miR-144-3p   |
| GATA4 | hsa-miR-21-5p    |
| GATA4 | hsa-miR-2110     |
| GATA4 | hsa-miR-30b-5p   |
| GATA4 | hsa-miR-31-5p    |
| GATA4 | hsa-miR-548g-3p  |
| GATA4 | hsa-miR-9-5p     |
| GATA4 | hsa-miR-935      |
| GATA4 | hsa-miR-92b-3p   |
| GATA4 | hsa-miR-92a-3p   |
| GATA4 | hsa-miR-92a-1-5p |
| GATA4 | hsa-miR-8085     |
| GATA4 | hsa-miR-7150     |
| GATA4 | hsa-miR-7-5p     |
| GATA4 | hsa-miR-6875-3p  |
| GATA4 | hsa-miR-6872-3p  |
| GATA4 | hsa-miR-6835-5p  |
| GATA4 | hsa-miR-6815-3p  |
| GATA4 | hsa-miR-6809-3p  |
| GATA4 | hsa-miR-6797-5p  |
| GATA4 | hsa-miR-6789-3p  |
| GATA4 | hsa-miR-6760-5p  |
| GATA4 | hsa-miR-663a     |
| GATA4 | hsa-miR-6511a-5p |
| GATA4 | hsa-miR-589-5p   |

|       |                  |
|-------|------------------|
| GATA4 | hsa-miR-589-3p   |
| GATA4 | hsa-miR-5703     |
| GATA4 | hsa-miR-548ah-5p |
| GATA4 | hsa-miR-5197-5p  |
| GATA4 | hsa-miR-5196-3p  |
| GATA4 | hsa-miR-5193     |
| GATA4 | hsa-miR-484      |
| GATA4 | hsa-miR-4795-5p  |
| GATA4 | hsa-miR-4768-5p  |
| GATA4 | hsa-miR-4763-3p  |
| GATA4 | hsa-miR-4738-3p  |
| GATA4 | hsa-miR-4736     |
| GATA4 | hsa-miR-4659b-3p |
| GATA4 | hsa-miR-4651     |
| GATA4 | hsa-miR-4650-5p  |
| GATA4 | hsa-miR-4510     |
| GATA4 | hsa-miR-449c-5p  |
| GATA4 | hsa-miR-4487     |
| GATA4 | hsa-miR-4470     |
| GATA4 | hsa-miR-4434     |
| GATA4 | hsa-miR-3934-5p  |
| GATA4 | hsa-miR-375      |
| GATA4 | hsa-miR-371b-3p  |
| GATA4 | hsa-miR-365a-5p  |
| GATA4 | hsa-miR-365a-3p  |
| GATA4 | hsa-miR-3658     |
| GATA4 | hsa-miR-34b-5p   |
| GATA4 | hsa-miR-324-5p   |
| GATA4 | hsa-miR-324-3p   |
| GATA4 | hsa-miR-320a     |
| GATA4 | hsa-miR-3199     |
| GATA4 | hsa-miR-3165     |
| GATA4 | hsa-miR-3128     |
| GATA4 | hsa-miR-22-3p    |
| GATA4 | hsa-miR-211-5p   |
| GATA4 | hsa-miR-210-3p   |
| GATA4 | hsa-miR-20a-5p   |
| GATA4 | hsa-miR-203a-3p  |
| GATA4 | hsa-miR-200a-3p  |
| GATA4 | hsa-miR-19b-3p   |

|       |                  |
|-------|------------------|
| GATA4 | hsa-miR-19a-3p   |
| GATA4 | hsa-miR-199a-5p  |
| GATA4 | hsa-miR-199a-3p  |
| GATA4 | hsa-miR-195-5p   |
| GATA4 | hsa-miR-194-3p   |
| GATA4 | hsa-miR-1908-5p  |
| GATA4 | hsa-miR-18a-5p   |
| GATA4 | hsa-miR-18a-3p   |
| GATA4 | hsa-miR-17-5p    |
| GATA4 | hsa-miR-155-5p   |
| GATA4 | hsa-miR-1322     |
| GATA4 | hsa-miR-132-3p   |
| GATA4 | hsa-miR-128-3p   |
| GATA4 | hsa-miR-1249-5p  |
| GATA4 | hsa-miR-124-3p   |
| GATA4 | hsa-miR-1207-5p  |
| GATA4 | hsa-miR-1181     |
| GATA4 | hsa-let-7i-5p    |
| GATA4 | hsa-let-7b-5p    |
| GATA6 | HIF1A            |
| GATA6 | IL6              |
| GATA6 | NFKB1            |
| GATA6 | PTGS2            |
| GATA6 | SMAD3            |
| GATA6 | STAT3            |
| GATA6 | TGFB1            |
| GATA6 | TLR4             |
| GATA6 | TP53             |
| GATA6 | hsa-miR-100-5p   |
| GATA6 | hsa-miR-137      |
| GATA6 | hsa-miR-138-2-3p |
| GATA6 | hsa-miR-138-5p   |
| GATA6 | hsa-miR-194-3p   |
| GATA6 | hsa-miR-375      |
| GATA6 | hsa-miR-618      |
| GATA6 | hsa-miR-9-5p     |
| GATA6 | hsa-miR-935      |
| GATA6 | hsa-miR-942-5p   |
| GATA6 | hsa-miR-7150     |
| GATA6 | hsa-miR-7-5p     |

|       |                  |
|-------|------------------|
| GATA6 | hsa-miR-6871-3p  |
| GATA6 | hsa-miR-6837-5p  |
| GATA6 | hsa-miR-6835-5p  |
| GATA6 | hsa-miR-6825-5p  |
| GATA6 | hsa-miR-6797-5p  |
| GATA6 | hsa-miR-6766-5p  |
| GATA6 | hsa-miR-6760-5p  |
| GATA6 | hsa-miR-6755-5p  |
| GATA6 | hsa-miR-6731-5p  |
| GATA6 | hsa-miR-663a     |
| GATA6 | hsa-miR-652-3p   |
| GATA6 | hsa-miR-6511a-5p |
| GATA6 | hsa-miR-633      |
| GATA6 | hsa-miR-625-3p   |
| GATA6 | hsa-miR-608      |
| GATA6 | hsa-miR-605-5p   |
| GATA6 | hsa-miR-589-5p   |
| GATA6 | hsa-miR-589-3p   |
| GATA6 | hsa-miR-5703     |
| GATA6 | hsa-miR-5692a    |
| GATA6 | hsa-miR-558      |
| GATA6 | hsa-miR-548g-3p  |
| GATA6 | hsa-miR-548ah-5p |
| GATA6 | hsa-miR-5196-3p  |
| GATA6 | hsa-miR-5094     |
| GATA6 | hsa-miR-485-5p   |
| GATA6 | hsa-miR-484      |
| GATA6 | hsa-miR-4795-5p  |
| GATA6 | hsa-miR-4738-3p  |
| GATA6 | hsa-miR-4736     |
| GATA6 | hsa-miR-4720-3p  |
| GATA6 | hsa-miR-4698     |
| GATA6 | hsa-miR-4697-3p  |
| GATA6 | hsa-miR-4684-5p  |
| GATA6 | hsa-miR-4659b-3p |
| GATA6 | hsa-miR-4651     |
| GATA6 | hsa-miR-4650-5p  |
| GATA6 | hsa-miR-4644     |
| GATA6 | hsa-miR-449c-5p  |
| GATA6 | hsa-miR-4499     |

|       |                 |
|-------|-----------------|
| GATA6 | hsa-miR-4487    |
| GATA6 | hsa-miR-4470    |
| GATA6 | hsa-miR-4463    |
| GATA6 | hsa-miR-4434    |
| GATA6 | hsa-miR-4279    |
| GATA6 | hsa-miR-4270    |
| GATA6 | hsa-miR-3934-5p |
| GATA6 | hsa-miR-3609    |
| GATA6 | hsa-miR-320a    |
| GATA6 | hsa-miR-3199    |
| GATA6 | hsa-miR-3165    |
| GATA6 | hsa-miR-3160-3p |
| GATA6 | hsa-miR-31-5p   |
| GATA6 | hsa-miR-30d-5p  |
| GATA6 | hsa-miR-30a-5p  |
| GATA6 | hsa-miR-29b-3p  |
| GATA6 | hsa-miR-26a-5p  |
| GATA6 | hsa-miR-22-3p   |
| GATA6 | hsa-miR-210-3p  |
| GATA6 | hsa-miR-203a-3p |
| GATA6 | hsa-miR-200a-3p |
| GATA6 | hsa-miR-199b-5p |
| GATA6 | hsa-miR-1908-5p |
| GATA6 | hsa-miR-181a-5p |
| GATA6 | hsa-miR-151a-3p |
| GATA6 | hsa-miR-149-5p  |
| GATA6 | hsa-miR-149-3p  |
| GATA6 | hsa-miR-146a-5p |
| GATA6 | hsa-miR-145-5p  |
| GATA6 | hsa-miR-1322    |
| GATA6 | hsa-miR-1296-3p |
| GATA6 | hsa-miR-128-3p  |
| GATA6 | hsa-miR-1234-3p |
| GATA6 | hsa-miR-1207-5p |
| GATA6 | hsa-miR-107     |
| GATA6 | hsa-miR-1-3p    |
| GATA6 | hsa-let-7i-5p   |
| GATA6 | hsa-let-7b-5p   |
| GATA6 | hsa-let-7a-5p   |
| GLI2  | HIF1A           |



|       |                 |
|-------|-----------------|
| GLI2  | STAT3           |
| GLI2  | TGFB1           |
| GLI2  | hsa-miR-92b-3p  |
| GLI2  | hsa-miR-484     |
| GLI2  | hsa-miR-3199    |
| GLI2  | hsa-miR-2110    |
| GLI2  | hsa-miR-203a-3p |
| GLI3  | HIF1A           |
| GLI3  | PTGS2           |
| GLI3  | STAT3           |
| GLI3  | TP53            |
| GLIS1 | HIF1A           |
| GLIS1 | NFKB1           |
| GLIS1 | hsa-miR-589-5p  |
| GLIS1 | hsa-miR-589-3p  |
| GLIS1 | hsa-miR-150-5p  |
| GMEB1 | HIF1A           |
| GMEB1 | SMAD3           |
| GMEB1 | STAT3           |
| GMEB1 | TP53            |
| GMEB1 | hsa-miR-935     |
| GMEB1 | hsa-miR-6785-5p |
| GMEB1 | hsa-miR-4763-3p |
| GMEB1 | hsa-let-7b-5p   |
| GMEB1 | hsa-let-7a-5p   |
| GMEB2 | HIF1A           |
| GMEB2 | PTGS2           |
| GMEB2 | SMAD3           |
| GMEB2 | STAT3           |
| GMEB2 | TGFB1           |
| GMEB2 | TP53            |
| GMEB2 | hsa-miR-93-5p   |
| GMEB2 | hsa-miR-6825-5p |
| GMEB2 | hsa-miR-25-3p   |
| GMEB2 | hsa-miR-194-3p  |
| GMEB2 | hsa-miR-132-3p  |
| GMEB2 | hsa-miR-128-3p  |
| GMEB2 | hsa-miR-106b-5p |
| GMEB2 | hsa-miR-106b-3p |
| HAND1 | HIF1A           |

|       |                  |
|-------|------------------|
| HAND1 | NFKB1            |
| HAND1 | TGFB1            |
| HAND1 | hsa-miR-9-5p     |
| HAND1 | hsa-miR-8071     |
| HAND1 | hsa-miR-6835-5p  |
| HAND1 | hsa-miR-6511a-5p |
| HAND1 | hsa-miR-5703     |
| HAND1 | hsa-miR-2682-5p  |
| HAND1 | hsa-miR-149-5p   |
| HAND1 | hsa-miR-149-3p   |
| HAND1 | hsa-miR-137      |
| HAND1 | hsa-miR-1234-3p  |
| HAND1 | hsa-miR-107      |
| HBP1  | HIF1A            |
| HBP1  | IL6              |
| HBP1  | NFKB1            |
| HBP1  | PTGS2            |
| HBP1  | SMAD3            |
| HBP1  | STAT3            |
| HBP1  | TGFB1            |
| HBP1  | hsa-miR-6875-3p  |
| HBP1  | hsa-miR-6760-5p  |
| HBP1  | hsa-miR-449c-5p  |
| HBP1  | hsa-miR-150-5p   |
| HBP1  | hsa-miR-144-3p   |
| HES1  | HIF1A            |
| HES1  | hsa-miR-6845-3p  |
| HES1  | hsa-miR-589-5p   |
| HES1  | hsa-miR-589-3p   |
| HES1  | hsa-miR-30e-5p   |
| HES4  | HIF1A            |
| HES4  | IL6              |
| HES4  | STAT3            |
| HES4  | hsa-miR-935      |
| HES4  | hsa-miR-6825-5p  |
| HES4  | hsa-miR-375      |
| HES4  | hsa-miR-3199     |
| HES4  | hsa-miR-203a-3p  |
| HES4  | hsa-miR-185-5p   |
| HEY1  | HIF1A            |

|      |                  |
|------|------------------|
| HEY1 | NFKB1            |
| HEY1 | SMAD3            |
| HEY1 | STAT3            |
| HEY1 | TGFB1            |
| HEY1 | TP53             |
| HEY1 | hsa-miR-93-5p    |
| HEY1 | hsa-miR-92b-3p   |
| HEY1 | hsa-miR-92a-3p   |
| HEY1 | hsa-miR-92a-1-5p |
| HEY1 | hsa-miR-6875-3p  |
| HEY1 | hsa-miR-6872-3p  |
| HEY1 | hsa-miR-6835-5p  |
| HEY1 | hsa-miR-6809-3p  |
| HEY1 | hsa-miR-6807-5p  |
| HEY1 | hsa-miR-6807-3p  |
| HEY1 | hsa-miR-6797-5p  |
| HEY1 | hsa-miR-6511a-5p |
| HEY1 | hsa-miR-612      |
| HEY1 | hsa-miR-5703     |
| HEY1 | hsa-miR-484      |
| HEY1 | hsa-miR-4736     |
| HEY1 | hsa-miR-4659b-3p |
| HEY1 | hsa-miR-4659a-3p |
| HEY1 | hsa-miR-4516     |
| HEY1 | hsa-miR-4487     |
| HEY1 | hsa-miR-324-5p   |
| HEY1 | hsa-miR-324-3p   |
| HEY1 | hsa-miR-3128     |
| HEY1 | hsa-miR-27a-3p   |
| HEY1 | hsa-miR-25-3p    |
| HEY1 | hsa-miR-24-3p    |
| HEY1 | hsa-miR-223-3p   |
| HEY1 | hsa-miR-22-3p    |
| HEY1 | hsa-miR-210-3p   |
| HEY1 | hsa-miR-21-5p    |
| HEY1 | hsa-miR-20a-5p   |
| HEY1 | hsa-miR-19b-3p   |
| HEY1 | hsa-miR-19a-3p   |
| HEY1 | hsa-miR-199b-5p  |
| HEY1 | hsa-miR-194-3p   |

|       |                 |
|-------|-----------------|
| HEY1  | hsa-miR-18a-5p  |
| HEY1  | hsa-miR-18a-3p  |
| HEY1  | hsa-miR-17-5p   |
| HEY1  | hsa-miR-150-5p  |
| HEY1  | hsa-miR-146b-5p |
| HEY1  | hsa-miR-144-3p  |
| HEY1  | hsa-miR-142-3p  |
| HEY1  | hsa-miR-132-3p  |
| HEY1  | hsa-miR-130b-3p |
| HEY1  | hsa-miR-1207-5p |
| HEY1  | hsa-miR-106b-5p |
| HEY1  | hsa-miR-106b-3p |
| HEY1  | hsa-let-7i-5p   |
| HIF1A | HIF1A           |
| HIF1A | IL6             |
| HIF1A | NFKB1           |
| HIF1A | PTGS2           |
| HIF1A | STAT3           |
| HIF1A | TGFB1           |
| HIF1A | TNF             |
| HIF1A | TP53            |
| HIF1A | hsa-miR-608     |
| HIF1A | hsa-miR-589-5p  |
| HIF1A | hsa-miR-589-3p  |
| HIF1A | hsa-miR-5089-3p |
| HIF1A | hsa-miR-4736    |
| HIF1A | hsa-miR-4531    |
| HIF1A | hsa-miR-4270    |
| HIF1A | hsa-miR-3199    |
| HIF1A | hsa-miR-296-3p  |
| HIF1A | hsa-miR-211-5p  |
| HIF1A | hsa-miR-193b-3p |
| HINFP | HIF1A           |
| HINFP | NFKB1           |
| HINFP | PTGS2           |
| HINFP | TGFB1           |
| HMG3  | HIF1A           |
| HMG3  | NFKB1           |
| HMG3  | STAT3           |
| HMG3  | TGFB1           |

|       |                  |
|-------|------------------|
| HMGN3 | TP53             |
| HMGN3 | hsa-let-7e-5p    |
| HMGN3 | hsa-miR-9-5p     |
| HMGN3 | hsa-miR-8085     |
| HMGN3 | hsa-miR-6722-3p  |
| HMGN3 | hsa-miR-622      |
| HMGN3 | hsa-miR-4659a-3p |
| HMGN3 | hsa-miR-4487     |
| HMGN3 | hsa-miR-4441     |
| HMGN3 | hsa-miR-424-5p   |
| HMGN3 | hsa-miR-223-3p   |
| HMGN3 | hsa-miR-185-5p   |
| HMGN3 | hsa-miR-150-5p   |
| HMGN3 | hsa-miR-146b-5p  |
| HMGN3 | hsa-miR-142-3p   |
| HNF4A | HIF1A            |
| HNF4A | IL10             |
| HNF4A | IL6              |
| HNF4A | NFKB1            |
| HNF4A | PTGS2            |
| HNF4A | SMAD3            |
| HNF4A | STAT3            |
| HNF4A | TGFB1            |
| HNF4A | TP53             |
| HNF4A | hsa-miR-1-3p     |
| HNF4A | hsa-miR-101-3p   |
| HNF4A | hsa-miR-146b-5p  |
| HNF4A | hsa-miR-194-3p   |
| HNF4A | hsa-miR-22-3p    |
| HNF4A | hsa-miR-26b-5p   |
| HNF4A | hsa-miR-3128     |
| HNF4A | hsa-miR-375      |
| HNF4A | hsa-miR-4651     |
| HNF4A | hsa-miR-484      |
| HNF4A | hsa-miR-618      |
| HNF4A | hsa-miR-7-5p     |
| HNF4A | hsa-miR-942-5p   |
| HNF4A | hsa-miR-92a-3p   |
| HNF4A | hsa-miR-92a-1-5p |
| HNF4A | hsa-miR-874-3p   |

|       |                  |
|-------|------------------|
| HNF4A | hsa-miR-8052     |
| HNF4A | hsa-miR-7158-5p  |
| HNF4A | hsa-miR-7150     |
| HNF4A | hsa-miR-7110-5p  |
| HNF4A | hsa-miR-7110-3p  |
| HNF4A | hsa-miR-6880-5p  |
| HNF4A | hsa-miR-6875-3p  |
| HNF4A | hsa-miR-6837-5p  |
| HNF4A | hsa-miR-6806-5p  |
| HNF4A | hsa-miR-6797-5p  |
| HNF4A | hsa-miR-6755-5p  |
| HNF4A | hsa-miR-625-3p   |
| HNF4A | hsa-miR-605-5p   |
| HNF4A | hsa-miR-5702     |
| HNF4A | hsa-miR-5693     |
| HNF4A | hsa-miR-5681b    |
| HNF4A | hsa-miR-5681a    |
| HNF4A | hsa-miR-558      |
| HNF4A | hsa-miR-548n     |
| HNF4A | hsa-miR-548ah-5p |
| HNF4A | hsa-miR-519d-3p  |
| HNF4A | hsa-miR-519c-3p  |
| HNF4A | hsa-miR-5094     |
| HNF4A | hsa-miR-5003-5p  |
| HNF4A | hsa-miR-485-5p   |
| HNF4A | hsa-miR-4778-3p  |
| HNF4A | hsa-miR-4742-3p  |
| HNF4A | hsa-miR-4728-5p  |
| HNF4A | hsa-miR-4720-3p  |
| HNF4A | hsa-miR-4698     |
| HNF4A | hsa-miR-4697-3p  |
| HNF4A | hsa-miR-4682     |
| HNF4A | hsa-miR-4662a-5p |
| HNF4A | hsa-miR-4659b-3p |
| HNF4A | hsa-miR-4659a-3p |
| HNF4A | hsa-miR-4487     |
| HNF4A | hsa-miR-4470     |
| HNF4A | hsa-miR-4270     |
| HNF4A | hsa-miR-3934-5p  |
| HNF4A | hsa-miR-379-3p   |

|       |                  |
|-------|------------------|
| HNF4A | hsa-miR-371b-3p  |
| HNF4A | hsa-miR-3658     |
| HNF4A | hsa-miR-335-5p   |
| HNF4A | hsa-miR-3165     |
| HNF4A | hsa-miR-3160-3p  |
| HNF4A | hsa-miR-30d-5p   |
| HNF4A | hsa-miR-30c-5p   |
| HNF4A | hsa-miR-30b-5p   |
| HNF4A | hsa-miR-30a-5p   |
| HNF4A | hsa-miR-29b-3p   |
| HNF4A | hsa-miR-299-5p   |
| HNF4A | hsa-miR-21-5p    |
| HNF4A | hsa-miR-20a-5p   |
| HNF4A | hsa-miR-19b-3p   |
| HNF4A | hsa-miR-19a-3p   |
| HNF4A | hsa-miR-1972     |
| HNF4A | hsa-miR-1909-3p  |
| HNF4A | hsa-miR-18a-5p   |
| HNF4A | hsa-miR-18a-3p   |
| HNF4A | hsa-miR-17-5p    |
| HNF4A | hsa-miR-153-5p   |
| HNF4A | hsa-miR-146a-5p  |
| HNF4A | hsa-miR-143-3p   |
| HNF4A | hsa-miR-138-5p   |
| HNF4A | hsa-miR-138-2-3p |
| HNF4A | hsa-miR-130b-3p  |
| HNF4A | hsa-miR-128-3p   |
| HNF4A | hsa-miR-1273f    |
| HNF4A | hsa-miR-125a-5p  |
| HNF4A | hsa-miR-122-5p   |
| HNF4A | hsa-miR-107      |
| HNF4A | hsa-miR-100-5p   |
| HNF4A | hsa-let-7e-5p    |
| HNF4A | hsa-let-7a-5p    |
| HNF4G | SMAD3            |
| HNF4G | STAT3            |
| HNF4G | hsa-miR-194-3p   |
| HOXA1 | HIF1A            |
| HOXA1 | IL6              |
| HOXA1 | NFKB1            |

|        |                  |
|--------|------------------|
| HOXA1  | PTGS2            |
| HOXA1  | SMAD3            |
| HOXA1  | STAT3            |
| HOXA1  | TGFB1            |
| HOXA1  | TP53             |
| HOXA1  | hsa-miR-9-5p     |
| HOXA1  | hsa-let-7b-5p    |
| HOXA10 | HIF1A            |
| HOXA10 | NFKB1            |
| HOXA10 | PTGS2            |
| HOXA10 | SMAD3            |
| HOXA10 | STAT3            |
| HOXA10 | TP53             |
| HOXA10 | hsa-miR-6752-5p  |
| HOXA10 | hsa-miR-5702     |
| HOXA10 | hsa-miR-3199     |
| HOXA10 | hsa-miR-27a-3p   |
| HOXA10 | hsa-miR-24-3p    |
| HOXA13 | PTGS2            |
| HOXA13 | SMAD3            |
| HOXA13 | STAT3            |
| HOXA13 | TP53             |
| HOXA13 | hsa-miR-92a-3p   |
| HOXA13 | hsa-miR-92a-1-5p |
| HOXA13 | hsa-miR-9-5p     |
| HOXA13 | hsa-miR-6789-3p  |
| HOXA13 | hsa-miR-5094     |
| HOXA13 | hsa-miR-4651     |
| HOXA13 | hsa-miR-375      |
| HOXA13 | hsa-miR-29b-3p   |
| HOXA13 | hsa-miR-222-3p   |
| HOXA13 | hsa-miR-221-3p   |
| HOXA13 | hsa-miR-20a-5p   |
| HOXA13 | hsa-miR-19b-3p   |
| HOXA13 | hsa-miR-19a-3p   |
| HOXA13 | hsa-miR-18a-5p   |
| HOXA13 | hsa-miR-18a-3p   |
| HOXA2  | PTGS2            |
| HOXA5  | TGFB1            |
| HOXA5  | hsa-miR-663a     |



|        |                  |
|--------|------------------|
| HOXA5  | hsa-miR-203a-3p  |
| HOXA5  | hsa-miR-130b-3p  |
| HOXA5  | hsa-miR-1273f    |
| HOXA6  | HIF1A            |
| HOXA6  | STAT3            |
| HOXA6  | hsa-miR-6752-5p  |
| HOXA6  | hsa-miR-5692a    |
| HOXA7  | IL6              |
| HOXA7  | hsa-miR-3199     |
| HOXB13 | PTGS2            |
| HOXB13 | SMAD3            |
| HOXB13 | STAT3            |
| HOXB13 | TP53             |
| HOXB13 | hsa-miR-223-3p   |
| HOXC13 | STAT3            |
| HOXC6  | HIF1A            |
| HOXC6  | PTGS2            |
| HOXC6  | TP53             |
| HOXC6  | hsa-miR-935      |
| HOXC6  | hsa-miR-92a-3p   |
| HOXC6  | hsa-miR-92a-1-5p |
| HOXC6  | hsa-miR-9-5p     |
| HOXC6  | hsa-miR-4470     |
| HOXC6  | hsa-miR-20a-5p   |
| HOXC6  | hsa-miR-19b-3p   |
| HOXC6  | hsa-miR-19a-3p   |
| HOXC6  | hsa-miR-18a-5p   |
| HOXC6  | hsa-miR-18a-3p   |
| HOXC6  | hsa-miR-17-5p    |
| HOXC9  | HIF1A            |
| HOXC9  | NFKB1            |
| HOXC9  | STAT3            |
| HOXC9  | TP53             |
| HOXC9  | hsa-miR-155-5p   |
| HOXC9  | hsa-miR-320a     |
| HOXC9  | hsa-miR-335-5p   |
| HOXC9  | hsa-miR-92b-3p   |
| HOXC9  | hsa-miR-8085     |
| HOXC9  | hsa-miR-6815-3p  |
| HOXC9  | hsa-miR-6731-5p  |

|               |                 |
|---------------|-----------------|
| HOXC9         | hsa-miR-618     |
| HOXC9         | hsa-miR-5703    |
| HOXC9         | hsa-miR-5193    |
| HOXC9         | hsa-miR-4738-3p |
| HOXC9         | hsa-miR-4650-5p |
| HOXC9         | hsa-miR-449c-5p |
| HOXC9         | hsa-miR-4487    |
| HOXC9         | hsa-miR-4282    |
| HOXC9         | hsa-miR-214-3p  |
| HOXC9         | hsa-miR-199b-5p |
| HOXC9         | hsa-miR-199a-5p |
| HOXC9         | hsa-miR-199a-3p |
| HOXC9         | hsa-miR-16-5p   |
| HOXC9         | hsa-miR-15b-5p  |
| HOXC9         | hsa-miR-137     |
| HOXC9         | hsa-miR-125b-5p |
| HOXC9         | hsa-miR-1207-5p |
| HOXC9         | hsa-let-7a-5p   |
| hsa-let-7a-5p | MYC             |
| hsa-let-7a-5p | PRDM1           |
| hsa-let-7a-5p | FOXA1           |
| hsa-let-7a-5p | VDR             |
| hsa-let-7a-5p | E2F1            |
| hsa-let-7a-5p | E2F2            |
| hsa-let-7a-5p | SP1             |
| hsa-let-7a-5p | HSF2            |
| hsa-let-7a-5p | HOXA6           |
| hsa-let-7a-5p | BACH1           |
| hsa-let-7a-5p | MXD1            |
| hsa-let-7a-5p | AHR             |
| hsa-let-7a-5p | ARID3A          |
| hsa-let-7a-5p | HAND1           |
| hsa-let-7a-5p | E2F6            |
| hsa-let-7a-5p | STAT2           |
| hsa-let-7a-5p | IL6             |
| hsa-let-7a-5p | NFKB1           |
| hsa-let-7a-5p | PTGS2           |
| hsa-let-7b-5p | E2F6            |
| hsa-let-7b-5p | SOX9            |
| hsa-let-7b-5p | ARID3A          |

|               |         |
|---------------|---------|
| hsa-let-7b-5p | PRDM1   |
| hsa-let-7b-5p | SMARCC1 |
| hsa-let-7b-5p | GATA6   |
| hsa-let-7b-5p | E2F3    |
| hsa-let-7b-5p | HIF1A   |
| hsa-let-7b-5p | HES1    |
| hsa-let-7b-5p | AR      |
| hsa-let-7b-5p | NCOR1   |
| hsa-let-7b-5p | SMARCC2 |
| hsa-let-7b-5p | HSF2    |
| hsa-let-7b-5p | HAND1   |
| hsa-let-7b-5p | NFATC1  |
| hsa-let-7b-5p | E2F7    |
| hsa-let-7b-5p | MYC     |
| hsa-let-7b-5p | ADNP    |
| hsa-let-7b-5p | MEF2C   |
| hsa-let-7b-5p | SP1     |
| hsa-let-7b-5p | ELK4    |
| hsa-let-7b-5p | CTCF    |
| hsa-let-7b-5p | CUX1    |
| hsa-let-7b-5p | BACH1   |
| hsa-let-7b-5p | MXD1    |
| hsa-let-7b-5p | AHR     |
| hsa-let-7b-5p | STAT2   |
| hsa-let-7b-5p | PTGS2   |
| hsa-let-7b-5p | TLR4    |
| hsa-let-7c-5p | MYC     |
| hsa-let-7c-5p | FOXO3   |
| hsa-let-7c-5p | MEF2C   |
| hsa-let-7c-5p | SMARCC1 |
| hsa-let-7c-5p | BACH1   |
| hsa-let-7c-5p | MXD1    |
| hsa-let-7c-5p | CEBPB   |
| hsa-let-7c-5p | PBX2    |
| hsa-let-7c-5p | XBP1    |
| hsa-let-7c-5p | USF2    |
| hsa-let-7c-5p | STAT2   |
| hsa-let-7c-5p | SREBF1  |
| hsa-let-7c-5p | SPDEF   |
| hsa-let-7c-5p | SETDB1  |

|               |        |
|---------------|--------|
| hsa-let-7c-5p | PBX3   |
| hsa-let-7c-5p | ID1    |
| hsa-let-7c-5p | HSF1   |
| hsa-let-7c-5p | ARID3A |
| hsa-let-7c-5p | AHR    |
| hsa-let-7c-5p | HAND1  |
| hsa-let-7c-5p | E2F6   |
| hsa-let-7c-5p | IL10   |
| hsa-let-7c-5p | IL6    |
| hsa-let-7c-5p | PTGS2  |
| hsa-let-7e-5p | SREBF1 |
| hsa-let-7e-5p | AEBP2  |
| hsa-let-7e-5p | STAT3  |
| hsa-let-7e-5p | TCF4   |
| hsa-let-7e-5p | BACH1  |
| hsa-let-7e-5p | MXD1   |
| hsa-let-7e-5p | MYC    |
| hsa-let-7e-5p | AHR    |
| hsa-let-7e-5p | ARID3A |
| hsa-let-7e-5p | HAND1  |
| hsa-let-7e-5p | E2F6   |
| hsa-let-7e-5p | STAT2  |
| hsa-let-7i-5p | KDM5B  |
| hsa-let-7i-5p | BACH1  |
| hsa-let-7i-5p | MXD1   |
| hsa-let-7i-5p | ASCL1  |
| hsa-let-7i-5p | MYC    |
| hsa-let-7i-5p | AHR    |
| hsa-let-7i-5p | ARID3A |
| hsa-let-7i-5p | HAND1  |
| hsa-let-7i-5p | E2F6   |
| hsa-let-7i-5p | STAT2  |
| hsa-let-7i-5p | TLR4   |
| hsa-miR-1-3p  | CEBPA  |
| hsa-miR-1-3p  | MEF2A  |
| hsa-miR-1-3p  | GATA4  |
| hsa-miR-1-3p  | FOXP1  |
| hsa-miR-1-3p  | ZNF384 |
| hsa-miR-1-3p  | GATA6  |
| hsa-miR-1-3p  | SNAI2  |

|                 |         |
|-----------------|---------|
| hsa-miR-1-3p    | SOX9    |
| hsa-miR-1-3p    | SRF     |
| hsa-miR-1-3p    | UBTF    |
| hsa-miR-1-3p    | PPARG   |
| hsa-miR-1-3p    | ETV7    |
| hsa-miR-1-3p    | NR5A2   |
| hsa-miR-1-3p    | LHX4    |
| hsa-miR-1-3p    | SMARCC1 |
| hsa-miR-1-3p    | GLI2    |
| hsa-miR-1-3p    | GATA3   |
| hsa-miR-1-3p    | SP1     |
| hsa-miR-1-3p    | ETS1    |
| hsa-miR-1-3p    | NFAT5   |
| hsa-miR-1-3p    | TFAM    |
| hsa-miR-1-3p    | IL6     |
| hsa-miR-1-3p    | TLR4    |
| hsa-miR-100-5p  | EGR2    |
| hsa-miR-100-5p  | ID1     |
| hsa-miR-100-5p  | FOXP1   |
| hsa-miR-100-5p  | PATZ1   |
| hsa-miR-100-5p  | NCOR2   |
| hsa-miR-100-5p  | HOXA1   |
| hsa-miR-100-5p  | ESR1    |
| hsa-miR-100-5p  | PTGS2   |
| hsa-miR-101-3p  | FOS     |
| hsa-miR-101-3p  | SOX9    |
| hsa-miR-101-3p  | GMEB2   |
| hsa-miR-101-3p  | NR2F2   |
| hsa-miR-101-3p  | JUN     |
| hsa-miR-101-3p  | E2F3    |
| hsa-miR-101-3p  | TFAP4   |
| hsa-miR-101-3p  | ZFX     |
| hsa-miR-101-3p  | AEBP2   |
| hsa-miR-101-3p  | ZEB1    |
| hsa-miR-101-3p  | MITF    |
| hsa-miR-101-3p  | ZBTB7A  |
| hsa-miR-101-3p  | PTGS2   |
| hsa-miR-106a-3p | GATA6   |
| hsa-miR-106a-3p | HIF1A   |
| hsa-miR-106a-3p | SMAD2   |

|                 |        |
|-----------------|--------|
| hsa-miR-106a-5p | E2F1   |
| hsa-miR-106a-5p | RUNX1  |
| hsa-miR-106a-5p | STAT3  |
| hsa-miR-106a-5p | RUNX3  |
| hsa-miR-106a-5p | SMAD4  |
| hsa-miR-106a-5p | KLF3   |
| hsa-miR-106a-5p | SOX4   |
| hsa-miR-106a-5p | HBP1   |
| hsa-miR-106a-5p | SP4    |
| hsa-miR-106a-5p | NFAT5  |
| hsa-miR-106a-5p | CREB1  |
| hsa-miR-106a-5p | REST   |
| hsa-miR-106a-5p | TP53   |
| hsa-miR-106a-5p | TFAM   |
| hsa-miR-106a-5p | ZBTB4  |
| hsa-miR-106a-5p | GATA6  |
| hsa-miR-106a-5p | ELK4   |
| hsa-miR-106a-5p | NR2C2  |
| hsa-miR-106a-5p | TCF7L2 |
| hsa-miR-106a-5p | ZBTB7A |
| hsa-miR-106a-5p | SPIB   |
| hsa-miR-106a-5p | ESR2   |
| hsa-miR-106a-5p | IL10   |
| hsa-miR-106b-3p | NFE2L2 |
| hsa-miR-106b-3p | HIF1A  |
| hsa-miR-106b-3p | ELF2   |
| hsa-miR-106b-5p | E2F1   |
| hsa-miR-106b-5p | E2F3   |
| hsa-miR-106b-5p | EOMES  |
| hsa-miR-106b-5p | MXI1   |
| hsa-miR-106b-5p | ELK3   |
| hsa-miR-106b-5p | CLOCK  |
| hsa-miR-106b-5p | STAT3  |
| hsa-miR-106b-5p | ZBTB4  |
| hsa-miR-106b-5p | HIF1A  |
| hsa-miR-106b-5p | SMAD4  |
| hsa-miR-106b-5p | KLF3   |
| hsa-miR-106b-5p | SOX4   |
| hsa-miR-106b-5p | HBP1   |
| hsa-miR-106b-5p | SP4    |

|                 |        |
|-----------------|--------|
| hsa-miR-106b-5p | NFAT5  |
| hsa-miR-106b-5p | WHSC1  |
| hsa-miR-106b-5p | CREB1  |
| hsa-miR-106b-5p | REST   |
| hsa-miR-106b-5p | AFF1   |
| hsa-miR-106b-5p | RUNX3  |
| hsa-miR-106b-5p | TP53   |
| hsa-miR-106b-5p | MYC    |
| hsa-miR-106b-5p | ZBTB7A |
| hsa-miR-106b-5p | TCF4   |
| hsa-miR-106b-5p | NR2C2  |
| hsa-miR-106b-5p | E2F2   |
| hsa-miR-106b-5p | TFAM   |
| hsa-miR-106b-5p | GATA6  |
| hsa-miR-106b-5p | ELK4   |
| hsa-miR-106b-5p | TCF7L2 |
| hsa-miR-106b-5p | SPIB   |
| hsa-miR-106b-5p | ESR2   |
| hsa-miR-107     | MYB    |
| hsa-miR-107     | HIF1A  |
| hsa-miR-107     | ARNT   |
| hsa-miR-107     | KLF4   |
| hsa-miR-107     | SALL4  |
| hsa-miR-107     | ELK4   |
| hsa-miR-107     | IL6    |
| hsa-miR-10b-5p  | KLF4   |
| hsa-miR-10b-5p  | NCOR2  |
| hsa-miR-10b-5p  | TFAP2C |
| hsa-miR-10b-5p  | TP53   |
| hsa-miR-10b-5p  | PAX6   |
| hsa-miR-10b-5p  | GATA3  |
| hsa-miR-10b-5p  | SREBF1 |
| hsa-miR-10b-5p  | RARG   |
| hsa-miR-10b-5p  | LYL1   |
| hsa-miR-10b-5p  | DLX1   |
| hsa-miR-10b-5p  | ASCL2  |
| hsa-miR-10b-5p  | NR2C2  |
| hsa-miR-10b-5p  | POU2F2 |
| hsa-miR-1178-3p | STAT3  |
| hsa-miR-1178-3p | TP63   |

|                 |        |
|-----------------|--------|
| hsa-miR-1181    | STAT3  |
| hsa-miR-1181    | SOX2   |
| hsa-miR-1181    | NKX2-2 |
| hsa-miR-1181    | FOXP1  |
| hsa-miR-1207-5p | TP53   |
| hsa-miR-1207-5p | TEAD1  |
| hsa-miR-1207-5p | SP2    |
| hsa-miR-1207-5p | MBD4   |
| hsa-miR-1207-5p | HAND1  |
| hsa-miR-122-5p  | SRF    |
| hsa-miR-122-5p  | FOXP1  |
| hsa-miR-122-5p  | SOX2   |
| hsa-miR-122-5p  | ZBTB4  |
| hsa-miR-122-5p  | MAZ    |
| hsa-miR-122-5p  | CREB1  |
| hsa-miR-122-5p  | MAFK   |
| hsa-miR-122-5p  | UBTF   |
| hsa-miR-122-5p  | PATZ1  |
| hsa-miR-122-5p  | SPIB   |
| hsa-miR-122-5p  | GMEB1  |
| hsa-miR-122-5p  | MAFF   |
| hsa-miR-122-5p  | TGFB1  |
| hsa-miR-1233-5p | E2F3   |
| hsa-miR-1233-5p | TP53   |
| hsa-miR-1233-5p | E2F6   |
| hsa-miR-1233-5p | AHR    |
| hsa-miR-1233-5p | ZMIZ1  |
| hsa-miR-1234-3p | STAT3  |
| hsa-miR-1234-3p | TCF21  |
| hsa-miR-1234-3p | FOS    |
| hsa-miR-1234-3p | SPIB   |
| hsa-miR-1234-3p | IRF1   |
| hsa-miR-1234-3p | ESR2   |
| hsa-miR-124-3p  | SOX9   |
| hsa-miR-124-3p  | CEBPA  |
| hsa-miR-124-3p  | RARG   |
| hsa-miR-124-3p  | NFIC   |
| hsa-miR-124-3p  | RELA   |
| hsa-miR-124-3p  | AHR    |
| hsa-miR-124-3p  | SP1    |



|                 |        |
|-----------------|--------|
| hsa-miR-124-3p  | TEAD1  |
| hsa-miR-124-3p  | SNAI2  |
| hsa-miR-124-3p  | NFATC1 |
| hsa-miR-124-3p  | ELK3   |
| hsa-miR-124-3p  | NR3C1  |
| hsa-miR-124-3p  | E2F6   |
| hsa-miR-124-3p  | AR     |
| hsa-miR-124-3p  | LHX2   |
| hsa-miR-124-3p  | GATA6  |
| hsa-miR-124-3p  | KLF4   |
| hsa-miR-124-3p  | E2F4   |
| hsa-miR-124-3p  | BCL6   |
| hsa-miR-124-3p  | ID1    |
| hsa-miR-124-3p  | EGR2   |
| hsa-miR-124-3p  | TFAP4  |
| hsa-miR-124-3p  | NRF1   |
| hsa-miR-124-3p  | MBD3   |
| hsa-miR-124-3p  | BARX1  |
| hsa-miR-124-3p  | TP63   |
| hsa-miR-124-3p  | XBP1   |
| hsa-miR-124-3p  | ERF    |
| hsa-miR-124-3p  | SP3    |
| hsa-miR-124-3p  | KLF9   |
| hsa-miR-124-3p  | PBX1   |
| hsa-miR-124-3p  | RFX1   |
| hsa-miR-124-3p  | ELF3   |
| hsa-miR-124-3p  | TFEB   |
| hsa-miR-124-3p  | MAZ    |
| hsa-miR-124-3p  | HOXC9  |
| hsa-miR-124-3p  | STAT5A |
| hsa-miR-124-3p  | RFX2   |
| hsa-miR-124-3p  | ID2    |
| hsa-miR-124-3p  | EGR1   |
| hsa-miR-124-3p  | TCF3   |
| hsa-miR-124-3p  | STAT3  |
| hsa-miR-124-3p  | CLOCK  |
| hsa-miR-124-3p  | REST   |
| hsa-miR-124-3p  | IL6    |
| hsa-miR-124-3p  | PTGS2  |
| hsa-miR-1249-5p | MAZ    |

|                 |        |
|-----------------|--------|
| hsa-miR-1249-5p | TP53   |
| hsa-miR-1249-5p | NFIC   |
| hsa-miR-1249-5p | NFAT5  |
| hsa-miR-1249-5p | GATA6  |
| hsa-miR-1249-5p | NCOR2  |
| hsa-miR-1249-5p | NRF1   |
| hsa-miR-125a-5p | TP53   |
| hsa-miR-125a-5p | SMAD4  |
| hsa-miR-125a-5p | E2F7   |
| hsa-miR-125a-5p | SP1    |
| hsa-miR-125a-5p | STAT2  |
| hsa-miR-125a-5p | IRF4   |
| hsa-miR-125a-5p | REST   |
| hsa-miR-125a-5p | PRDM1  |
| hsa-miR-125a-5p | ESRRA  |
| hsa-miR-125a-5p | MYC    |
| hsa-miR-125b-5p | TP53   |
| hsa-miR-125b-5p | VDR    |
| hsa-miR-125b-5p | CEBPG  |
| hsa-miR-125b-5p | PRDM1  |
| hsa-miR-125b-5p | IRF4   |
| hsa-miR-125b-5p | STAT3  |
| hsa-miR-125b-5p | E2F3   |
| hsa-miR-125b-5p | ETS1   |
| hsa-miR-125b-5p | SMAD4  |
| hsa-miR-125b-5p | E2F2   |
| hsa-miR-125b-5p | HOXA13 |
| hsa-miR-125b-5p | E2F7   |
| hsa-miR-125b-5p | CEBPA  |
| hsa-miR-125b-5p | BACH1  |
| hsa-miR-125b-5p | ARID3A |
| hsa-miR-125b-5p | NCOR2  |
| hsa-miR-125b-5p | MXD1   |
| hsa-miR-125b-5p | REST   |
| hsa-miR-1264    | ID2    |
| hsa-miR-1264    | TP53   |
| hsa-miR-1273f   | TP53   |
| hsa-miR-1273f   | THAP1  |
| hsa-miR-128-3p  | E2F3   |
| hsa-miR-128-3p  | GATA6  |

|                 |        |
|-----------------|--------|
| hsa-miR-128-3p  | HOXC6  |
| hsa-miR-128-3p  | SOX2   |
| hsa-miR-128-3p  | KLF4   |
| hsa-miR-128-3p  | ZNF552 |
| hsa-miR-128-3p  | POU5F1 |
| hsa-miR-128-3p  | KLF5   |
| hsa-miR-128-3p  | E2F7   |
| hsa-miR-128-3p  | NANOG  |
| hsa-miR-128-3p  | SNAI2  |
| hsa-miR-128-3p  | SREBF1 |
| hsa-miR-128-3p  | RXRA   |
| hsa-miR-128-3p  | ZFHX3  |
| hsa-miR-128-3p  | SP1    |
| hsa-miR-128-3p  | HOXA10 |
| hsa-miR-128-3p  | NR2F2  |
| hsa-miR-128-3p  | RUNX1  |
| hsa-miR-128-3p  | PTGS2  |
| hsa-miR-1285-3p | TP53   |
| hsa-miR-1285-3p | RUNX1  |
| hsa-miR-1288-5p | STAT3  |
| hsa-miR-1288-5p | MBD3   |
| hsa-miR-1296-3p | TP53   |
| hsa-miR-1296-3p | UBTF   |
| hsa-miR-130a-3p | HOXA5  |
| hsa-miR-130a-3p | MAFB   |
| hsa-miR-130a-3p | HOXA10 |
| hsa-miR-130a-3p | KLF4   |
| hsa-miR-130a-3p | PPARG  |
| hsa-miR-130a-3p | ESR1   |
| hsa-miR-130a-3p | RUNX3  |
| hsa-miR-130a-3p | SMAD4  |
| hsa-miR-130a-3p | SOX4   |
| hsa-miR-130a-3p | HBP1   |
| hsa-miR-130a-3p | YY1    |
| hsa-miR-130a-3p | ZBTB4  |
| hsa-miR-130a-3p | TCF7L2 |
| hsa-miR-130a-3p | IRF1   |
| hsa-miR-130a-3p | TGFB1  |
| hsa-miR-130a-3p | TNF    |
| hsa-miR-130b-3p | RUNX3  |

|                  |        |
|------------------|--------|
| hsa-miR-130b-3p  | PPARG  |
| hsa-miR-130b-3p  | ZEB1   |
| hsa-miR-130b-3p  | NR3C1  |
| hsa-miR-130b-3p  | AHR    |
| hsa-miR-130b-3p  | EGR2   |
| hsa-miR-130b-3p  | SMAD4  |
| hsa-miR-130b-3p  | HOXA5  |
| hsa-miR-130b-3p  | ZBTB4  |
| hsa-miR-130b-3p  | KLF9   |
| hsa-miR-130b-3p  | E2F1   |
| hsa-miR-130b-3p  | ZNF217 |
| hsa-miR-130b-3p  | TCF4   |
| hsa-miR-130b-3p  | STAT3  |
| hsa-miR-130b-3p  | SOX4   |
| hsa-miR-130b-3p  | HBP1   |
| hsa-miR-130b-3p  | YY1    |
| hsa-miR-130b-3p  | ESR1   |
| hsa-miR-130b-3p  | TCF7L2 |
| hsa-miR-130b-3p  | IRF1   |
| hsa-miR-132-3p   | MEF2A  |
| hsa-miR-132-3p   | GATA3  |
| hsa-miR-132-3p   | PTGS2  |
| hsa-miR-1322     | HIF1A  |
| hsa-miR-1322     | CTCF   |
| hsa-miR-137      | E2F6   |
| hsa-miR-137      | MITF   |
| hsa-miR-137      | ESRRA  |
| hsa-miR-137      | KLF4   |
| hsa-miR-137      | NFYB   |
| hsa-miR-137      | NR3C1  |
| hsa-miR-137      | PTGS2  |
| hsa-miR-138-2-3p | ZFH3   |
| hsa-miR-138-2-3p | STAT3  |
| hsa-miR-138-2-3p | REST   |
| hsa-miR-138-5p   | CEBPA  |
| hsa-miR-138-5p   | PPARG  |
| hsa-miR-138-5p   | FOSL1  |
| hsa-miR-138-5p   | HIF1A  |
| hsa-miR-138-5p   | MXD1   |
| hsa-miR-138-5p   | SOX4   |

|                |        |
|----------------|--------|
| hsa-miR-138-5p | SNAI2  |
| hsa-miR-138-5p | NR3C1  |
| hsa-miR-139-5p | FOS    |
| hsa-miR-139-5p | JUN    |
| hsa-miR-139-5p | NR5A2  |
| hsa-miR-139-5p | TCF12  |
| hsa-miR-139-5p | NFKB1  |
| hsa-miR-142-3p | ARNTL  |
| hsa-miR-142-3p | HOXA13 |
| hsa-miR-142-3p | CLOCK  |
| hsa-miR-142-3p | EGR2   |
| hsa-miR-142-3p | BACH1  |
| hsa-miR-142-3p | ATF5   |
| hsa-miR-142-3p | AFF1   |
| hsa-miR-142-3p | HOXA10 |
| hsa-miR-142-3p | HOXA7  |
| hsa-miR-142-3p | ZNF217 |
| hsa-miR-142-3p | ZFX    |
| hsa-miR-142-3p | WIZ    |
| hsa-miR-142-3p | BCLAF1 |
| hsa-miR-142-3p | WHSC1  |
| hsa-miR-142-3p | ESR1   |
| hsa-miR-142-3p | IRF1   |
| hsa-miR-142-3p | IL6    |
| hsa-miR-143-3p | KLF5   |
| hsa-miR-143-3p | SMAD3  |
| hsa-miR-143-3p | NR2C2  |
| hsa-miR-143-3p | HNF4A  |
| hsa-miR-143-3p | NFIC   |
| hsa-miR-143-3p | NFYB   |
| hsa-miR-143-3p | THAP1  |
| hsa-miR-143-3p | PTGS2  |
| hsa-miR-143-3p | TNF    |
| hsa-miR-144-3p | NFE2L2 |
| hsa-miR-144-3p | ZFX    |
| hsa-miR-144-3p | NR2F2  |
| hsa-miR-144-3p | HOXA10 |
| hsa-miR-144-3p | TFAP4  |
| hsa-miR-144-3p | NR3C1  |
| hsa-miR-144-3p | ZBTB7A |

|                 |        |
|-----------------|--------|
| hsa-miR-144-3p  | TGFB1  |
| hsa-miR-145-5p  | KLF5   |
| hsa-miR-145-5p  | SOX2   |
| hsa-miR-145-5p  | KLF4   |
| hsa-miR-145-5p  | STAT1  |
| hsa-miR-145-5p  | MYC    |
| hsa-miR-145-5p  | POU5F1 |
| hsa-miR-145-5p  | ESR1   |
| hsa-miR-145-5p  | ERG    |
| hsa-miR-145-5p  | NANOG  |
| hsa-miR-145-5p  | ETS1   |
| hsa-miR-145-5p  | SOX9   |
| hsa-miR-145-5p  | SMAD3  |
| hsa-miR-145-5p  | SMAD4  |
| hsa-miR-145-5p  | SP1    |
| hsa-miR-145-5p  | E2F3   |
| hsa-miR-145-5p  | NFATC1 |
| hsa-miR-1468-3p | HBP1   |
| hsa-miR-1468-3p | ETS2   |
| hsa-miR-1468-3p | NFAT5  |
| hsa-miR-1468-3p | FOXP1  |
| hsa-miR-1468-3p | ZFHX3  |
| hsa-miR-1468-3p | YY1    |
| hsa-miR-1468-3p | SOX4   |
| hsa-miR-1468-3p | SMAD4  |
| hsa-miR-1468-3p | CREBL2 |
| hsa-miR-1468-3p | E2F8   |
| hsa-miR-1468-3p | MYBL1  |
| hsa-miR-1468-3p | GATA6  |
| hsa-miR-1468-3p | NFYA   |
| hsa-miR-1468-3p | TLR4   |
| hsa-miR-146a-5p | SMAD4  |
| hsa-miR-146a-5p | STAT1  |
| hsa-miR-146a-5p | SMAD2  |
| hsa-miR-146a-5p | MBD4   |
| hsa-miR-146a-5p | NFKB1  |
| hsa-miR-146a-5p | PTGS2  |
| hsa-miR-146a-5p | TLR4   |
| hsa-miR-146b-5p | MBD4   |
| hsa-miR-146b-5p | NFKB1  |

|                 |        |
|-----------------|--------|
| hsa-miR-146b-5p | TLR4   |
| hsa-miR-149-3p  | E2F1   |
| hsa-miR-149-3p  | MYBL2  |
| hsa-miR-149-3p  | JUN    |
| hsa-miR-149-3p  | MAZ    |
| hsa-miR-149-3p  | ZFHX3  |
| hsa-miR-149-3p  | TP53   |
| hsa-miR-149-3p  | NFAT5  |
| hsa-miR-149-3p  | GATA6  |
| hsa-miR-149-3p  | NCOR2  |
| hsa-miR-149-3p  | SREBF1 |
| hsa-miR-149-3p  | CASZ1  |
| hsa-miR-149-3p  | ASCL2  |
| hsa-miR-149-3p  | HOXB13 |
| hsa-miR-149-3p  | CREBL2 |
| hsa-miR-149-3p  | MNT    |
| hsa-miR-149-3p  | NFIC   |
| hsa-miR-149-3p  | NRF1   |
| hsa-miR-149-3p  | ZNF250 |
| hsa-miR-149-3p  | WIZ    |
| hsa-miR-149-3p  | FOSL2  |
| hsa-miR-149-3p  | AHR    |
| hsa-miR-149-5p  | SP1    |
| hsa-miR-149-5p  | USF1   |
| hsa-miR-149-5p  | PBX1   |
| hsa-miR-149-5p  | HES4   |
| hsa-miR-149-5p  | ETS2   |
| hsa-miR-149-5p  | E2F3   |
| hsa-miR-149-5p  | NR2F1  |
| hsa-miR-149-5p  | HOXA10 |
| hsa-miR-149-5p  | JUN    |
| hsa-miR-149-5p  | FOXM1  |
| hsa-miR-149-5p  | IL6    |
| hsa-miR-150-5p  | MYB    |
| hsa-miR-150-5p  | EGR2   |
| hsa-miR-150-5p  | ZEB1   |
| hsa-miR-150-5p  | TP53   |
| hsa-miR-150-5p  | ZBTB7A |
| hsa-miR-150-5p  | SP1    |
| hsa-miR-150-5p  | SPIB   |

|                 |        |
|-----------------|--------|
| hsa-miR-150-5p  | NFYA   |
| hsa-miR-150-5p  | ELK1   |
| hsa-miR-150-5p  | NKX2-1 |
| hsa-miR-150-5p  | NR2F2  |
| hsa-miR-150-5p  | THAP1  |
| hsa-miR-150-5p  | ESR2   |
| hsa-miR-150-5p  | TEAD1  |
| hsa-miR-151a-3p | HIF1A  |
| hsa-miR-153-5p  | FOXG1  |
| hsa-miR-153-5p  | HIF1A  |
| hsa-miR-153-5p  | MTA3   |
| hsa-miR-153-5p  | ZBTB7A |
| hsa-miR-153-5p  | PAX5   |
| hsa-miR-153-5p  | RFX1   |
| hsa-miR-153-5p  | VDR    |
| hsa-miR-153-5p  | NFIC   |
| hsa-miR-155-5p  | BACH1  |
| hsa-miR-155-5p  | SMAD1  |
| hsa-miR-155-5p  | RCOR1  |
| hsa-miR-155-5p  | CEBPB  |
| hsa-miR-155-5p  | CUX1   |
| hsa-miR-155-5p  | SPI1   |
| hsa-miR-155-5p  | FOXO3  |
| hsa-miR-155-5p  | MAFB   |
| hsa-miR-155-5p  | ETS1   |
| hsa-miR-155-5p  | VEZF1  |
| hsa-miR-155-5p  | SMAD2  |
| hsa-miR-155-5p  | MYB    |
| hsa-miR-155-5p  | JUN    |
| hsa-miR-155-5p  | BCL6   |
| hsa-miR-155-5p  | MITF   |
| hsa-miR-155-5p  | MEF2A  |
| hsa-miR-155-5p  | ESRRA  |
| hsa-miR-155-5p  | JUNB   |
| hsa-miR-155-5p  | NR3C1  |
| hsa-miR-155-5p  | SMAD4  |
| hsa-miR-155-5p  | ZNF384 |
| hsa-miR-155-5p  | SMAD3  |
| hsa-miR-155-5p  | HBP1   |
| hsa-miR-155-5p  | ZNF83  |



|                |         |
|----------------|---------|
| hsa-miR-155-5p | TCF12   |
| hsa-miR-155-5p | STAT3   |
| hsa-miR-155-5p | MYBL1   |
| hsa-miR-155-5p | E2F2    |
| hsa-miR-155-5p | FOS     |
| hsa-miR-155-5p | KLF9    |
| hsa-miR-155-5p | MYC     |
| hsa-miR-155-5p | SP1     |
| hsa-miR-155-5p | ELK4    |
| hsa-miR-155-5p | MXI1    |
| hsa-miR-155-5p | ZKSCAN1 |
| hsa-miR-155-5p | TCF4    |
| hsa-miR-155-5p | NFAT5   |
| hsa-miR-155-5p | IL2     |
| hsa-miR-155-5p | IL6     |
| hsa-miR-155-5p | NFKB1   |
| hsa-miR-15a-5p | MYB     |
| hsa-miR-15a-5p | CREBL2  |
| hsa-miR-15a-5p | JUN     |
| hsa-miR-15a-5p | TP53    |
| hsa-miR-15a-5p | ATF2    |
| hsa-miR-15a-5p | MYBL1   |
| hsa-miR-15a-5p | KLF4    |
| hsa-miR-15a-5p | BHLHE40 |
| hsa-miR-15a-5p | E2F3    |
| hsa-miR-15a-5p | MAFK    |
| hsa-miR-15a-5p | RCOR1   |
| hsa-miR-15a-5p | SMAD3   |
| hsa-miR-15a-5p | IRF4    |
| hsa-miR-15a-5p | ELK4    |
| hsa-miR-15a-5p | GABPA   |
| hsa-miR-15a-5p | TFAP2A  |
| hsa-miR-15a-5p | NFIC    |
| hsa-miR-15a-5p | E2F7    |
| hsa-miR-15a-5p | HOXA10  |
| hsa-miR-15a-5p | MBD4    |
| hsa-miR-15a-5p | TCF3    |
| hsa-miR-15a-5p | NR2C2   |
| hsa-miR-15a-5p | NCOR2   |
| hsa-miR-15a-5p | NFKB1   |

|                |         |
|----------------|---------|
| hsa-miR-15b-5p | ZNF217  |
| hsa-miR-15b-5p | BHLHE40 |
| hsa-miR-15b-5p | E2F3    |
| hsa-miR-15b-5p | MAFK    |
| hsa-miR-15b-5p | RCOR1   |
| hsa-miR-15b-5p | SMAD3   |
| hsa-miR-15b-5p | IRF4    |
| hsa-miR-15b-5p | ELK4    |
| hsa-miR-15b-5p | GABPA   |
| hsa-miR-15b-5p | TFAP2A  |
| hsa-miR-15b-5p | NFIC    |
| hsa-miR-15b-5p | E2F7    |
| hsa-miR-15b-5p | HOXA10  |
| hsa-miR-15b-5p | MBD4    |
| hsa-miR-15b-5p | CREBL2  |
| hsa-miR-15b-5p | TCF3    |
| hsa-miR-15b-5p | NR2C2   |
| hsa-miR-15b-5p | NCOR2   |
| hsa-miR-16-5p  | CREBL2  |
| hsa-miR-16-5p  | JUN     |
| hsa-miR-16-5p  | MYB     |
| hsa-miR-16-5p  | ZNF384  |
| hsa-miR-16-5p  | TP53    |
| hsa-miR-16-5p  | NCOR2   |
| hsa-miR-16-5p  | SMAD1   |
| hsa-miR-16-5p  | SP1     |
| hsa-miR-16-5p  | TFAP4   |
| hsa-miR-16-5p  | TFAP2A  |
| hsa-miR-16-5p  | ZFH3    |
| hsa-miR-16-5p  | E2F7    |
| hsa-miR-16-5p  | E2F3    |
| hsa-miR-16-5p  | TBP     |
| hsa-miR-16-5p  | BHLHE40 |
| hsa-miR-16-5p  | MAFK    |
| hsa-miR-16-5p  | RCOR1   |
| hsa-miR-16-5p  | SMAD3   |
| hsa-miR-16-5p  | IRF4    |
| hsa-miR-16-5p  | ELK4    |
| hsa-miR-16-5p  | GABPA   |
| hsa-miR-16-5p  | MYC     |

|               |        |
|---------------|--------|
| hsa-miR-16-5p | NFIC   |
| hsa-miR-16-5p | HOXA10 |
| hsa-miR-16-5p | MBD4   |
| hsa-miR-16-5p | TCF3   |
| hsa-miR-16-5p | NR2C2  |
| hsa-miR-16-5p | NFKB1  |
| hsa-miR-16-5p | PTGS2  |
| hsa-miR-17-5p | E2F1   |
| hsa-miR-17-5p | RUNX1  |
| hsa-miR-17-5p | HIF1A  |
| hsa-miR-17-5p | MYC    |
| hsa-miR-17-5p | SMAD4  |
| hsa-miR-17-5p | E2F3   |
| hsa-miR-17-5p | TCF3   |
| hsa-miR-17-5p | HBP1   |
| hsa-miR-17-5p | SOX4   |
| hsa-miR-17-5p | ATF3   |
| hsa-miR-17-5p | NFAT5  |
| hsa-miR-17-5p | SMAD3  |
| hsa-miR-17-5p | MNT    |
| hsa-miR-17-5p | ZBTB4  |
| hsa-miR-17-5p | STAT3  |
| hsa-miR-17-5p | KLF3   |
| hsa-miR-17-5p | SP4    |
| hsa-miR-17-5p | WHSC1  |
| hsa-miR-17-5p | CREB1  |
| hsa-miR-17-5p | REST   |
| hsa-miR-17-5p | AFF1   |
| hsa-miR-17-5p | ETV1   |
| hsa-miR-17-5p | TP53   |
| hsa-miR-17-5p | TFAM   |
| hsa-miR-17-5p | GATA6  |
| hsa-miR-17-5p | ELK4   |
| hsa-miR-17-5p | NR2C2  |
| hsa-miR-17-5p | TCF7L2 |
| hsa-miR-17-5p | RUNX3  |
| hsa-miR-17-5p | ZBTB7A |
| hsa-miR-17-5p | SPIB   |
| hsa-miR-17-5p | ESR2   |
| hsa-miR-17-5p | TCF4   |

|                 |        |
|-----------------|--------|
| hsa-miR-17-5p   | MXI1   |
| hsa-miR-17-5p   | E2F2   |
| hsa-miR-17-5p   | CLOCK  |
| hsa-miR-17-5p   | PTGS2  |
| hsa-miR-17-5p   | TGFB1  |
| hsa-miR-181a-5p | GATA6  |
| hsa-miR-181a-5p | CDX2   |
| hsa-miR-181a-5p | PROX1  |
| hsa-miR-181a-5p | FOS    |
| hsa-miR-181a-5p | TCF21  |
| hsa-miR-181a-5p | OTX2   |
| hsa-miR-181a-5p | SNAI2  |
| hsa-miR-181a-5p | NFYB   |
| hsa-miR-181a-5p | MAZ    |
| hsa-miR-181a-5p | TEAD4  |
| hsa-miR-181a-5p | PBX3   |
| hsa-miR-181a-5p | PGR    |
| hsa-miR-181a-5p | SMAD2  |
| hsa-miR-181a-5p | RCOR1  |
| hsa-miR-181a-5p | ELK4   |
| hsa-miR-181a-5p | WHSC1  |
| hsa-miR-181a-5p | AHR    |
| hsa-miR-181a-5p | STAT3  |
| hsa-miR-181a-5p | ZNF83  |
| hsa-miR-181a-5p | ETS1   |
| hsa-miR-181a-5p | ZBTB4  |
| hsa-miR-181a-5p | KDM5A  |
| hsa-miR-181a-5p | PTGS2  |
| hsa-miR-181c-5p | GATA6  |
| hsa-miR-181c-5p | CDX2   |
| hsa-miR-181c-5p | RCOR1  |
| hsa-miR-181c-5p | ELK4   |
| hsa-miR-181c-5p | WHSC1  |
| hsa-miR-181c-5p | ZNF83  |
| hsa-miR-181c-5p | ETS1   |
| hsa-miR-181c-5p | ZBTB4  |
| hsa-miR-181c-5p | KDM5A  |
| hsa-miR-181c-5p | IL2    |
| hsa-miR-185-5p  | AR     |
| hsa-miR-185-5p  | SREBF1 |

|                 |        |
|-----------------|--------|
| hsa-miR-185-5p  | PBX2   |
| hsa-miR-185-5p  | BACH1  |
| hsa-miR-185-5p  | TFDP1  |
| hsa-miR-185-5p  | TP53   |
| hsa-miR-185-5p  | MYBL1  |
| hsa-miR-185-5p  | GATA6  |
| hsa-miR-185-5p  | HOXC6  |
| hsa-miR-187-3p  | TNF    |
| hsa-miR-18a-3p  | SRF    |
| hsa-miR-18a-3p  | NFIC   |
| hsa-miR-18a-3p  | UBTF   |
| hsa-miR-18a-3p  | SMAD3  |
| hsa-miR-18a-5p  | ESR1   |
| hsa-miR-18a-5p  | NR3C1  |
| hsa-miR-18a-5p  | HIF1A  |
| hsa-miR-18a-5p  | SMAD4  |
| hsa-miR-18a-5p  | HSF2   |
| hsa-miR-18a-5p  | SMAD3  |
| hsa-miR-18a-5p  | GABPA  |
| hsa-miR-18a-5p  | CREBL2 |
| hsa-miR-18a-5p  | ETS2   |
| hsa-miR-18a-5p  | SMAD2  |
| hsa-miR-18a-5p  | TP53   |
| hsa-miR-18a-5p  | IRF2   |
| hsa-miR-18b-5p  | ESR1   |
| hsa-miR-18b-5p  | CUX1   |
| hsa-miR-18b-5p  | HIF1A  |
| hsa-miR-18b-5p  | SMAD2  |
| hsa-miR-18b-5p  | CREBL2 |
| hsa-miR-18b-5p  | IRF2   |
| hsa-miR-1908-5p | BARHL1 |
| hsa-miR-1908-5p | JUND   |
| hsa-miR-1908-5p | NKX2-5 |
| hsa-miR-1908-5p | PTGS2  |
| hsa-miR-1909-3p | TP53   |
| hsa-miR-1909-3p | SP2    |
| hsa-miR-1909-3p | MBD4   |
| hsa-miR-1909-3p | ARID3A |
| hsa-miR-1910-3p | HIF1A  |
| hsa-miR-1910-3p | AR     |

|                 |         |
|-----------------|---------|
| hsa-miR-193b-3p | ESR1    |
| hsa-miR-193b-3p | ETS1    |
| hsa-miR-193b-3p | DLX1    |
| hsa-miR-193b-3p | LEF1    |
| hsa-miR-193b-3p | WHSC1   |
| hsa-miR-193b-3p | E2F6    |
| hsa-miR-193b-3p | MAX     |
| hsa-miR-193b-3p | MYBL1   |
| hsa-miR-193b-3p | E2F1    |
| hsa-miR-193b-3p | ELK3    |
| hsa-miR-193b-3p | E2F2    |
| hsa-miR-193b-3p | MYB     |
| hsa-miR-193b-3p | TEAD2   |
| hsa-miR-193b-3p | SMAD3   |
| hsa-miR-193b-3p | MAZ     |
| hsa-miR-193b-3p | TCF7L2  |
| hsa-miR-193b-3p | YY1     |
| hsa-miR-193b-3p | ZNF384  |
| hsa-miR-193b-3p | IRF1    |
| hsa-miR-194-3p  | TP53    |
| hsa-miR-195-5p  | E2F3    |
| hsa-miR-195-5p  | MYB     |
| hsa-miR-195-5p  | BHLHE40 |
| hsa-miR-195-5p  | MAFK    |
| hsa-miR-195-5p  | RCOR1   |
| hsa-miR-195-5p  | SMAD3   |
| hsa-miR-195-5p  | IRF4    |
| hsa-miR-195-5p  | ELK4    |
| hsa-miR-195-5p  | GABPA   |
| hsa-miR-195-5p  | TFAP2A  |
| hsa-miR-195-5p  | NFIC    |
| hsa-miR-195-5p  | E2F7    |
| hsa-miR-195-5p  | HOXA10  |
| hsa-miR-195-5p  | MBD4    |
| hsa-miR-195-5p  | CREBL2  |
| hsa-miR-195-5p  | TCF3    |
| hsa-miR-195-5p  | NR2C2   |
| hsa-miR-195-5p  | NCOR2   |
| hsa-miR-1972    | TP53    |
| hsa-miR-199a-3p | ETS2    |

|                 |        |
|-----------------|--------|
| hsa-miR-199a-3p | JUNB   |
| hsa-miR-199a-3p | ID2    |
| hsa-miR-199a-3p | E2F2   |
| hsa-miR-199a-3p | ZNF384 |
| hsa-miR-199a-3p | PTGS2  |
| hsa-miR-199a-5p | JUNB   |
| hsa-miR-199a-5p | ETS2   |
| hsa-miR-199a-5p | HIF1A  |
| hsa-miR-199a-5p | SOX9   |
| hsa-miR-199a-5p | SMAD4  |
| hsa-miR-199a-5p | MAFB   |
| hsa-miR-199a-5p | E2F3   |
| hsa-miR-199a-5p | GATA6  |
| hsa-miR-199a-5p | NFKB1  |
| hsa-miR-199a-5p | PTGS2  |
| hsa-miR-199b-5p | HES1   |
| hsa-miR-199b-5p | HIF1A  |
| hsa-miR-199b-5p | E2F3   |
| hsa-miR-199b-5p | GATA6  |
| hsa-miR-19a-3p  | HOXA5  |
| hsa-miR-19a-3p  | ESR1   |
| hsa-miR-19a-3p  | SMAD4  |
| hsa-miR-19a-3p  | MXD1   |
| hsa-miR-19a-3p  | ZBTB4  |
| hsa-miR-19a-3p  | SOX4   |
| hsa-miR-19a-3p  | HBP1   |
| hsa-miR-19a-3p  | RCOR1  |
| hsa-miR-19a-3p  | IKZF1  |
| hsa-miR-19a-3p  | AFF1   |
| hsa-miR-19a-3p  | MYC    |
| hsa-miR-19a-3p  | YY1    |
| hsa-miR-19a-3p  | CREBL2 |
| hsa-miR-19a-3p  | CLOCK  |
| hsa-miR-19a-3p  | E2F8   |
| hsa-miR-19a-3p  | CASZ1  |
| hsa-miR-19a-3p  | MBD3   |
| hsa-miR-19a-3p  | ZNF217 |
| hsa-miR-19a-3p  | TP53   |
| hsa-miR-19a-3p  | MEF2A  |
| hsa-miR-19a-3p  | MBD4   |

|                 |        |
|-----------------|--------|
| hsa-miR-19a-3p  | FOXP1  |
| hsa-miR-19a-3p  | TNF    |
| hsa-miR-19b-3p  | ESR1   |
| hsa-miR-19b-3p  | NR3C1  |
| hsa-miR-19b-3p  | SMAD4  |
| hsa-miR-19b-3p  | GMEB2  |
| hsa-miR-19b-3p  | ZNF217 |
| hsa-miR-19b-3p  | HOXA5  |
| hsa-miR-19b-3p  | ZBTB4  |
| hsa-miR-19b-3p  | TCF4   |
| hsa-miR-19b-3p  | CREBL2 |
| hsa-miR-19b-3p  | E2F8   |
| hsa-miR-19b-3p  | ATF2   |
| hsa-miR-19b-3p  | HBP1   |
| hsa-miR-19b-3p  | MXD1   |
| hsa-miR-19b-3p  | SOX4   |
| hsa-miR-19b-3p  | RCOR1  |
| hsa-miR-19b-3p  | IKZF1  |
| hsa-miR-19b-3p  | AFF1   |
| hsa-miR-19b-3p  | MYBL2  |
| hsa-miR-19b-3p  | CREB1  |
| hsa-miR-19b-3p  | TP53   |
| hsa-miR-19b-3p  | YY1    |
| hsa-miR-19b-3p  | CLOCK  |
| hsa-miR-19b-3p  | CASZ1  |
| hsa-miR-19b-3p  | MBD3   |
| hsa-miR-19b-3p  | MEF2A  |
| hsa-miR-19b-3p  | MBD4   |
| hsa-miR-19b-3p  | FOXP1  |
| hsa-miR-19b-3p  | TGFB1  |
| hsa-miR-200a-3p | ZEB1   |
| hsa-miR-200a-3p | GATA6  |
| hsa-miR-200a-3p | SRF    |
| hsa-miR-200a-3p | SMAD2  |
| hsa-miR-200a-3p | SMAD3  |
| hsa-miR-200a-3p | MYB    |
| hsa-miR-200a-3p | TFAM   |
| hsa-miR-200a-3p | TP53   |
| hsa-miR-203a-3p | TP63   |
| hsa-miR-203a-3p | SMAD4  |



|                 |        |
|-----------------|--------|
| hsa-miR-203a-3p | E2F1   |
| hsa-miR-203a-3p | E2F3   |
| hsa-miR-203a-3p | CREB1  |
| hsa-miR-203a-3p | SNAI2  |
| hsa-miR-203a-3p | JUN    |
| hsa-miR-203a-3p | NFYA   |
| hsa-miR-203a-3p | TCF4   |
| hsa-miR-203a-3p | ZEB1   |
| hsa-miR-203a-3p | MAFK   |
| hsa-miR-203a-3p | HOXA1  |
| hsa-miR-203a-3p | CLOCK  |
| hsa-miR-203a-3p | PAX6   |
| hsa-miR-203a-3p | NR2F2  |
| hsa-miR-203a-3p | GATA6  |
| hsa-miR-203a-3p | NKX2-1 |
| hsa-miR-203a-3p | SMAD2  |
| hsa-miR-203a-3p | IL6    |
| hsa-miR-203a-3p | TNF    |
| hsa-miR-20a-5p  | HIF1A  |
| hsa-miR-20a-5p  | E2F1   |
| hsa-miR-20a-5p  | RUNX1  |
| hsa-miR-20a-5p  | MYC    |
| hsa-miR-20a-5p  | SMAD4  |
| hsa-miR-20a-5p  | E2F3   |
| hsa-miR-20a-5p  | IRF2   |
| hsa-miR-20a-5p  | PPARG  |
| hsa-miR-20a-5p  | NCOR2  |
| hsa-miR-20a-5p  | VEZF1  |
| hsa-miR-20a-5p  | STAT3  |
| hsa-miR-20a-5p  | GATA6  |
| hsa-miR-20a-5p  | BACH1  |
| hsa-miR-20a-5p  | EGR2   |
| hsa-miR-20a-5p  | KLF3   |
| hsa-miR-20a-5p  | SOX4   |
| hsa-miR-20a-5p  | HBP1   |
| hsa-miR-20a-5p  | SP4    |
| hsa-miR-20a-5p  | NFAT5  |
| hsa-miR-20a-5p  | WHSC1  |
| hsa-miR-20a-5p  | CREB1  |
| hsa-miR-20a-5p  | REST   |

|                |        |
|----------------|--------|
| hsa-miR-20a-5p | AFF1   |
| hsa-miR-20a-5p | ETV1   |
| hsa-miR-20a-5p | TP53   |
| hsa-miR-20a-5p | ZBTB7A |
| hsa-miR-20a-5p | ZBTB4  |
| hsa-miR-20a-5p | TCF4   |
| hsa-miR-20a-5p | NR2C2  |
| hsa-miR-20a-5p | MXI1   |
| hsa-miR-20a-5p | E2F2   |
| hsa-miR-20a-5p | CLOCK  |
| hsa-miR-20a-5p | TFAM   |
| hsa-miR-20a-5p | ELK4   |
| hsa-miR-20a-5p | TCF7L2 |
| hsa-miR-20a-5p | RUNX3  |
| hsa-miR-20a-5p | SPIB   |
| hsa-miR-20a-5p | ESR2   |
| hsa-miR-20b-5p | STAT3  |
| hsa-miR-20b-5p | HIF1A  |
| hsa-miR-20b-5p | PPARG  |
| hsa-miR-20b-5p | ESR1   |
| hsa-miR-20b-5p | SMAD4  |
| hsa-miR-20b-5p | KLF3   |
| hsa-miR-20b-5p | SOX4   |
| hsa-miR-20b-5p | HBP1   |
| hsa-miR-20b-5p | SP4    |
| hsa-miR-20b-5p | NFAT5  |
| hsa-miR-20b-5p | WHSC1  |
| hsa-miR-20b-5p | CREB1  |
| hsa-miR-20b-5p | REST   |
| hsa-miR-20b-5p | AFF1   |
| hsa-miR-20b-5p | E2F3   |
| hsa-miR-20b-5p | TFAM   |
| hsa-miR-20b-5p | ZBTB4  |
| hsa-miR-20b-5p | GATA6  |
| hsa-miR-20b-5p | ELK4   |
| hsa-miR-20b-5p | NR2C2  |
| hsa-miR-20b-5p | TCF7L2 |
| hsa-miR-20b-5p | RUNX3  |
| hsa-miR-20b-5p | ZBTB7A |
| hsa-miR-20b-5p | SPIB   |

|                |        |
|----------------|--------|
| hsa-miR-20b-5p | ESR2   |
| hsa-miR-20b-5p | TCF4   |
| hsa-miR-20b-5p | MXI1   |
| hsa-miR-20b-5p | E2F2   |
| hsa-miR-20b-5p | E2F1   |
| hsa-miR-20b-5p | CLOCK  |
| hsa-miR-21-5p  | REST   |
| hsa-miR-21-5p  | E2F2   |
| hsa-miR-21-5p  | E2F1   |
| hsa-miR-21-5p  | MYC    |
| hsa-miR-21-5p  | TP63   |
| hsa-miR-21-5p  | MEF2C  |
| hsa-miR-21-5p  | SP1    |
| hsa-miR-21-5p  | TCF21  |
| hsa-miR-21-5p  | CLOCK  |
| hsa-miR-21-5p  | SOX2   |
| hsa-miR-21-5p  | MEF2A  |
| hsa-miR-21-5p  | WHSC1  |
| hsa-miR-21-5p  | NR2C2  |
| hsa-miR-21-5p  | ADNP   |
| hsa-miR-21-5p  | ZNF217 |
| hsa-miR-21-5p  | NFAT5  |
| hsa-miR-21-5p  | KLF5   |
| hsa-miR-21-5p  | PBX1   |
| hsa-miR-21-5p  | KLF9   |
| hsa-miR-21-5p  | ATF2   |
| hsa-miR-21-5p  | STAT3  |
| hsa-miR-21-5p  | BCL6   |
| hsa-miR-21-5p  | FOXO3  |
| hsa-miR-21-5p  | HIF1A  |
| hsa-miR-21-5p  | E2F3   |
| hsa-miR-21-5p  | NFKB1  |
| hsa-miR-21-5p  | TGFB1  |
| hsa-miR-21-5p  | TLR4   |
| hsa-miR-210-3p | HOXA1  |
| hsa-miR-210-3p | ELK3   |
| hsa-miR-210-3p | E2F3   |
| hsa-miR-210-3p | MNT    |
| hsa-miR-210-3p | HIF1A  |
| hsa-miR-210-3p | NFIC   |

|                |        |
|----------------|--------|
| hsa-miR-210-3p | MITF   |
| hsa-miR-210-3p | FOXP3  |
| hsa-miR-210-3p | NFKB1  |
| hsa-miR-211-5p | TCF12  |
| hsa-miR-211-5p | NFAT5  |
| hsa-miR-211-5p | MTA3   |
| hsa-miR-211-5p | POU2F2 |
| hsa-miR-211-5p | ZFHX3  |
| hsa-miR-211-5p | SP1    |
| hsa-miR-211-5p | SPIB   |
| hsa-miR-211-5p | SNAI2  |
| hsa-miR-211-5p | NFATC1 |
| hsa-miR-211-5p | TCF7L2 |
| hsa-miR-211-5p | BACH2  |
| hsa-miR-211-5p | TGFB1  |
| hsa-miR-2110   | NCOR2  |
| hsa-miR-2110   | BCL11A |
| hsa-miR-2110   | E2F3   |
| hsa-miR-2110   | TP53   |
| hsa-miR-2110   | MAX    |
| hsa-miR-2110   | AR     |
| hsa-miR-2110   | HAND1  |
| hsa-miR-2110   | SP1    |
| hsa-miR-214-3p | XBP1   |
| hsa-miR-214-3p | TP53   |
| hsa-miR-214-3p | TFAP2A |
| hsa-miR-214-3p | NFIC   |
| hsa-miR-214-3p | TFAP2C |
| hsa-miR-217    | E2F3   |
| hsa-miR-217    | FOXO3  |
| hsa-miR-217    | TCF7L2 |
| hsa-miR-217    | HOXA13 |
| hsa-miR-217    | HIF1A  |
| hsa-miR-217    | BACH2  |
| hsa-miR-217    | MXD1   |
| hsa-miR-217    | HINFP  |
| hsa-miR-22-3p  | ESR1   |
| hsa-miR-22-3p  | IRF5   |
| hsa-miR-22-3p  | RCOR1  |
| hsa-miR-22-3p  | SP1    |

|                |        |
|----------------|--------|
| hsa-miR-22-3p  | MAX    |
| hsa-miR-22-3p  | FOXP1  |
| hsa-miR-22-3p  | ZNF217 |
| hsa-miR-22-3p  | E2F2   |
| hsa-miR-22-3p  | NR3C1  |
| hsa-miR-22-3p  | HIF1A  |
| hsa-miR-221-3p | FOXO3  |
| hsa-miR-221-3p | MYBL1  |
| hsa-miR-221-3p | FOS    |
| hsa-miR-221-3p | ESR1   |
| hsa-miR-221-3p | TP53   |
| hsa-miR-221-3p | ETS1   |
| hsa-miR-221-3p | KLF9   |
| hsa-miR-221-3p | E2F3   |
| hsa-miR-221-3p | TFAP2A |
| hsa-miR-221-3p | YY1    |
| hsa-miR-221-3p | NFYA   |
| hsa-miR-221-3p | CTCF   |
| hsa-miR-221-3p | RUNX1  |
| hsa-miR-221-3p | ARNT   |
| hsa-miR-221-3p | STAT5A |
| hsa-miR-222-3p | STAT5A |
| hsa-miR-222-3p | FOXO3  |
| hsa-miR-222-3p | FOS    |
| hsa-miR-222-3p | ESR1   |
| hsa-miR-222-3p | TP53   |
| hsa-miR-222-3p | ETS1   |
| hsa-miR-222-3p | HES1   |
| hsa-miR-222-3p | HOXA13 |
| hsa-miR-222-3p | ZBTB7A |
| hsa-miR-222-3p | MAZ    |
| hsa-miR-222-3p | PBX2   |
| hsa-miR-222-3p | ATF5   |
| hsa-miR-222-3p | MYC    |
| hsa-miR-222-3p | TFAP2A |
| hsa-miR-223-3p | MEF2C  |
| hsa-miR-223-3p | E2F1   |
| hsa-miR-223-3p | SP3    |
| hsa-miR-223-3p | TAL1   |
| hsa-miR-223-3p | PRDM1  |

|                 |         |
|-----------------|---------|
| hsa-miR-223-3p  | STAT5A  |
| hsa-miR-223-3p  | FOXO3   |
| hsa-miR-223-3p  | SP1     |
| hsa-miR-223-3p  | PAX6    |
| hsa-miR-223-3p  | TP53    |
| hsa-miR-223-3p  | IL6     |
| hsa-miR-24-3p   | MYC     |
| hsa-miR-24-3p   | E2F2    |
| hsa-miR-24-3p   | HNF4A   |
| hsa-miR-24-3p   | NFAT5   |
| hsa-miR-24-3p   | ZNF217  |
| hsa-miR-24-3p   | CTCF    |
| hsa-miR-24-3p   | HSF2    |
| hsa-miR-24-3p   | E2F3    |
| hsa-miR-24-3p   | E2F1    |
| hsa-miR-24-3p   | MXI1    |
| hsa-miR-24-3p   | MAFB    |
| hsa-miR-24-3p   | ATF3    |
| hsa-miR-24-3p   | ZKSCAN1 |
| hsa-miR-24-3p   | GMEB1   |
| hsa-miR-24-3p   | WIZ     |
| hsa-miR-24-3p   | FOSL2   |
| hsa-miR-24-3p   | GATA6   |
| hsa-miR-24-3p   | TGFB1   |
| hsa-miR-25-3p   | KLF4    |
| hsa-miR-25-3p   | TP53    |
| hsa-miR-25-3p   | SREBF1  |
| hsa-miR-25-3p   | RCOR1   |
| hsa-miR-25-3p   | SOX4    |
| hsa-miR-25-3p   | MYC     |
| hsa-miR-25-3p   | GATA6   |
| hsa-miR-25-3p   | NFYB    |
| hsa-miR-25-3p   | HOXA13  |
| hsa-miR-2682-5p | MYC     |
| hsa-miR-2682-5p | HIF1A   |
| hsa-miR-26a-5p  | SMAD1   |
| hsa-miR-26a-5p  | SMAD4   |
| hsa-miR-26a-5p  | MYC     |
| hsa-miR-26a-5p  | ESR1    |
| hsa-miR-26a-5p  | E2F7    |

|                |         |
|----------------|---------|
| hsa-miR-26a-5p | TFAM    |
| hsa-miR-26a-5p | NKX2-5  |
| hsa-miR-26a-5p | UBTF    |
| hsa-miR-26a-5p | AHR     |
| hsa-miR-26a-5p | FOXO3   |
| hsa-miR-26a-5p | RCOR1   |
| hsa-miR-26a-5p | IRF4    |
| hsa-miR-26a-5p | MTA3    |
| hsa-miR-26a-5p | ZKSCAN1 |
| hsa-miR-26a-5p | IL6     |
| hsa-miR-26b-5p | GATA4   |
| hsa-miR-26b-5p | NFE2L2  |
| hsa-miR-26b-5p | CLOCK   |
| hsa-miR-26b-5p | SRF     |
| hsa-miR-26b-5p | MEF2C   |
| hsa-miR-26b-5p | ATF3    |
| hsa-miR-26b-5p | SIX5    |
| hsa-miR-26b-5p | ADNP    |
| hsa-miR-26b-5p | HSF2    |
| hsa-miR-26b-5p | ID1     |
| hsa-miR-26b-5p | FOXG1   |
| hsa-miR-26b-5p | PBX3    |
| hsa-miR-26b-5p | MXI1    |
| hsa-miR-26b-5p | SP4     |
| hsa-miR-26b-5p | JUN     |
| hsa-miR-26b-5p | NKX2-2  |
| hsa-miR-26b-5p | GATA2   |
| hsa-miR-26b-5p | ETV4    |
| hsa-miR-26b-5p | IKZF1   |
| hsa-miR-26b-5p | GLI2    |
| hsa-miR-26b-5p | FOXD2   |
| hsa-miR-26b-5p | HSF1    |
| hsa-miR-26b-5p | TCF12   |
| hsa-miR-26b-5p | NKX2-5  |
| hsa-miR-26b-5p | TFEB    |
| hsa-miR-26b-5p | FOXM1   |
| hsa-miR-26b-5p | BATF    |
| hsa-miR-26b-5p | BCLAF1  |
| hsa-miR-26b-5p | NR2C2   |
| hsa-miR-26b-5p | RCOR1   |

|                |         |
|----------------|---------|
| hsa-miR-26b-5p | IRF4    |
| hsa-miR-26b-5p | E2F7    |
| hsa-miR-26b-5p | MTA3    |
| hsa-miR-26b-5p | ZKSCAN1 |
| hsa-miR-26b-5p | NFKB1   |
| hsa-miR-26b-5p | PTGS2   |
| hsa-miR-27a-3p | RUNX1   |
| hsa-miR-27a-3p | SP4     |
| hsa-miR-27a-3p | SP3     |
| hsa-miR-27a-3p | SP1     |
| hsa-miR-27a-3p | NFE2L2  |
| hsa-miR-27a-3p | HOXC6   |
| hsa-miR-27a-3p | TP53    |
| hsa-miR-27a-3p | PPARG   |
| hsa-miR-27a-3p | HOXA10  |
| hsa-miR-27a-3p | GATA2   |
| hsa-miR-27a-3p | ZNF384  |
| hsa-miR-27a-3p | ZFHX3   |
| hsa-miR-27a-3p | ARNTL   |
| hsa-miR-27a-3p | SPIB    |
| hsa-miR-27a-3p | NR2F2   |
| hsa-miR-27a-3p | SMAD4   |
| hsa-miR-27a-3p | ZFX     |
| hsa-miR-27a-3p | SMAD2   |
| hsa-miR-27a-3p | E2F7    |
| hsa-miR-296-3p | HOXA6   |
| hsa-miR-296-3p | SPI1    |
| hsa-miR-296-3p | HES1    |
| hsa-miR-296-3p | MTA3    |
| hsa-miR-296-3p | IRF1    |
| hsa-miR-296-3p | KDM5B   |
| hsa-miR-296-3p | SETDB1  |
| hsa-miR-296-3p | MAZ     |
| hsa-miR-296-3p | TFAP2A  |
| hsa-miR-296-3p | HAND1   |
| hsa-miR-296-3p | PTGS2   |
| hsa-miR-299-5p | SOX4    |
| hsa-miR-299-5p | KLF3    |
| hsa-miR-299-5p | HOXB13  |
| hsa-miR-299-5p | HIF1A   |



|                 |         |
|-----------------|---------|
| hsa-miR-29b-3p  | SP1     |
| hsa-miR-29b-3p  | ESR1    |
| hsa-miR-29b-3p  | FOS     |
| hsa-miR-29b-3p  | SMARCC1 |
| hsa-miR-29b-3p  | REST    |
| hsa-miR-29b-3p  | MAZ     |
| hsa-miR-29b-3p  | MXD1    |
| hsa-miR-29b-3p  | GATA3   |
| hsa-miR-29b-3p  | TGFB1   |
| hsa-miR-3065-5p | SOX4    |
| hsa-miR-3065-5p | SP1     |
| hsa-miR-3065-5p | MYBL1   |
| hsa-miR-3065-5p | TP53    |
| hsa-miR-3074-3p | HIF1A   |
| hsa-miR-3074-3p | MAFK    |
| hsa-miR-3074-3p | AFF1    |
| hsa-miR-30a-5p  | JUN     |
| hsa-miR-30a-5p  | SMAD1   |
| hsa-miR-30a-5p  | PRDM1   |
| hsa-miR-30a-5p  | ESRRA   |
| hsa-miR-30a-5p  | ERG     |
| hsa-miR-30a-5p  | ESR2    |
| hsa-miR-30a-5p  | BCL11A  |
| hsa-miR-30a-5p  | TFDP1   |
| hsa-miR-30a-5p  | FOXG1   |
| hsa-miR-30a-5p  | SOX4    |
| hsa-miR-30a-5p  | SP4     |
| hsa-miR-30a-5p  | NFAT5   |
| hsa-miR-30a-5p  | ARID3A  |
| hsa-miR-30a-5p  | TP53    |
| hsa-miR-30a-5p  | FOXA1   |
| hsa-miR-30a-5p  | MYBL2   |
| hsa-miR-30b-5p  | SMAD1   |
| hsa-miR-30b-5p  | BCL6    |
| hsa-miR-30b-5p  | ARID3A  |
| hsa-miR-30b-5p  | SOX4    |
| hsa-miR-30b-5p  | KLF4    |
| hsa-miR-30b-5p  | HEY1    |
| hsa-miR-30b-5p  | ERG     |
| hsa-miR-30b-5p  | TFDP1   |

|                |        |
|----------------|--------|
| hsa-miR-30b-5p | FOXG1  |
| hsa-miR-30b-5p | SP4    |
| hsa-miR-30b-5p | NFAT5  |
| hsa-miR-30b-5p | PRDM1  |
| hsa-miR-30b-5p | TP53   |
| hsa-miR-30b-5p | FOXA1  |
| hsa-miR-30b-5p | MYBL2  |
| hsa-miR-30c-5p | SMAD1  |
| hsa-miR-30c-5p | E2F3   |
| hsa-miR-30c-5p | SOX4   |
| hsa-miR-30c-5p | MXI1   |
| hsa-miR-30c-5p | ETS1   |
| hsa-miR-30c-5p | NFYB   |
| hsa-miR-30c-5p | NCOR2  |
| hsa-miR-30c-5p | TFDP1  |
| hsa-miR-30c-5p | FOXG1  |
| hsa-miR-30c-5p | SP4    |
| hsa-miR-30c-5p | NFAT5  |
| hsa-miR-30c-5p | ARID3A |
| hsa-miR-30c-5p | PRDM1  |
| hsa-miR-30c-5p | TP53   |
| hsa-miR-30c-5p | SNAI2  |
| hsa-miR-30c-5p | MYC    |
| hsa-miR-30c-5p | FOXA1  |
| hsa-miR-30c-5p | MYBL2  |
| hsa-miR-30d-5p | TP53   |
| hsa-miR-30d-5p | SMAD1  |
| hsa-miR-30d-5p | IRF2   |
| hsa-miR-30d-5p | MAZ    |
| hsa-miR-30d-5p | ZBTB4  |
| hsa-miR-30d-5p | TFDP1  |
| hsa-miR-30d-5p | FOXG1  |
| hsa-miR-30d-5p | SOX4   |
| hsa-miR-30d-5p | SP4    |
| hsa-miR-30d-5p | NFAT5  |
| hsa-miR-30d-5p | ARID3A |
| hsa-miR-30d-5p | PRDM1  |
| hsa-miR-30d-5p | MYC    |
| hsa-miR-30d-5p | FOXA1  |
| hsa-miR-30d-5p | MYBL2  |

|                 |         |
|-----------------|---------|
| hsa-miR-30e-5p  | MYBL2   |
| hsa-miR-30e-5p  | RELA    |
| hsa-miR-30e-5p  | TFDP1   |
| hsa-miR-30e-5p  | FOXP1   |
| hsa-miR-30e-5p  | SOX4    |
| hsa-miR-30e-5p  | SP4     |
| hsa-miR-30e-5p  | NFAT5   |
| hsa-miR-30e-5p  | ARID3A  |
| hsa-miR-30e-5p  | PRDM1   |
| hsa-miR-30e-5p  | TP53    |
| hsa-miR-30e-5p  | FOXA1   |
| hsa-miR-31      | FOXP3   |
| hsa-miR-31-5p   | YY1     |
| hsa-miR-31-5p   | NFAT5   |
| hsa-miR-31-5p   | HOXC13  |
| hsa-miR-31-5p   | ETS1    |
| hsa-miR-31-5p   | GLI2    |
| hsa-miR-31-5p   | HOXA7   |
| hsa-miR-31-5p   | SP1     |
| hsa-miR-31-5p   | AR      |
| hsa-miR-31-5p   | AFF1    |
| hsa-miR-31-5p   | FOXP3   |
| hsa-miR-3121-3p | HIF1A   |
| hsa-miR-3121-3p | TAL1    |
| hsa-miR-3128    | E2F3    |
| hsa-miR-3128    | HIF1A   |
| hsa-miR-3160-3p | ZFX     |
| hsa-miR-3160-3p | ZNF250  |
| hsa-miR-3160-3p | RUNX3   |
| hsa-miR-3160-3p | HIF1A   |
| hsa-miR-3165    | MNT     |
| hsa-miR-3165    | TP53    |
| hsa-miR-3199    | ZKSCAN1 |
| hsa-miR-3199    | HINFP   |
| hsa-miR-3199    | STAT3   |
| hsa-miR-320a    | NANOG   |
| hsa-miR-320a    | TEAD1   |
| hsa-miR-320a    | TCF3    |
| hsa-miR-320a    | TFAP2A  |
| hsa-miR-320a    | NRF1    |

|                |         |
|----------------|---------|
| hsa-miR-320a   | HOXA10  |
| hsa-miR-320a   | SMARCC2 |
| hsa-miR-320a   | XBP1    |
| hsa-miR-320a   | NCOR1   |
| hsa-miR-320a   | MYC     |
| hsa-miR-320a   | FOXP1   |
| hsa-miR-320a   | USF2    |
| hsa-miR-320a   | RELA    |
| hsa-miR-320a   | SRF     |
| hsa-miR-320a   | MAX     |
| hsa-miR-320a   | TAL1    |
| hsa-miR-320a   | TP73    |
| hsa-miR-320a   | PTGS2   |
| hsa-miR-324-3p | SRF     |
| hsa-miR-324-3p | SETDB1  |
| hsa-miR-324-3p | MYC     |
| hsa-miR-324-3p | TGFB1   |
| hsa-miR-324-5p | WHSC1   |
| hsa-miR-324-5p | TP53    |
| hsa-miR-324-5p | WIZ     |
| hsa-miR-324-5p | TCF7L2  |
| hsa-miR-324-5p | RELA    |
| hsa-miR-324-5p | NKX2-5  |
| hsa-miR-324-5p | MAZ     |
| hsa-miR-324-5p | SMAD2   |
| hsa-miR-324-5p | MYOD1   |
| hsa-miR-324-5p | ARNT    |
| hsa-miR-324-5p | NFATC1  |
| hsa-miR-329-5p | ZFX     |
| hsa-miR-329-5p | ZNF83   |
| hsa-miR-329-5p | HIF1A   |
| hsa-miR-335-5p | SOX4    |
| hsa-miR-335-5p | KDM5B   |
| hsa-miR-335-5p | MEF2A   |
| hsa-miR-335-5p | KLF4    |
| hsa-miR-335-5p | SALL4   |
| hsa-miR-335-5p | MAFB    |
| hsa-miR-335-5p | HOXA2   |
| hsa-miR-335-5p | HEY1    |
| hsa-miR-335-5p | TEAD2   |

|                |         |
|----------------|---------|
| hsa-miR-335-5p | FOXA2   |
| hsa-miR-335-5p | HOXC6   |
| hsa-miR-335-5p | TFE3    |
| hsa-miR-335-5p | FOXO3   |
| hsa-miR-335-5p | IRF2    |
| hsa-miR-335-5p | RARG    |
| hsa-miR-335-5p | JUND    |
| hsa-miR-335-5p | NANOG   |
| hsa-miR-335-5p | ETV5    |
| hsa-miR-335-5p | NR1D1   |
| hsa-miR-335-5p | BARX2   |
| hsa-miR-335-5p | BCL6    |
| hsa-miR-335-5p | SP1     |
| hsa-miR-335-5p | EHF     |
| hsa-miR-335-5p | MXD1    |
| hsa-miR-335-5p | ETV1    |
| hsa-miR-335-5p | KDM5A   |
| hsa-miR-335-5p | ATOH1   |
| hsa-miR-335-5p | LYL1    |
| hsa-miR-335-5p | KLF3    |
| hsa-miR-335-5p | ZMIZ1   |
| hsa-miR-335-5p | MXI1    |
| hsa-miR-335-5p | SOX9    |
| hsa-miR-335-5p | STAT2   |
| hsa-miR-335-5p | GATA1   |
| hsa-miR-335-5p | MYC     |
| hsa-miR-335-5p | ESR2    |
| hsa-miR-335-5p | BHLHE40 |
| hsa-miR-335-5p | SP4     |
| hsa-miR-335-5p | NFAT5   |
| hsa-miR-335-5p | TFAP4   |
| hsa-miR-335-5p | PROX1   |
| hsa-miR-335-5p | ARNTL   |
| hsa-miR-335-5p | FOXP1   |
| hsa-miR-335-5p | SREBF1  |
| hsa-miR-335-5p | ASCL2   |
| hsa-miR-335-5p | ZEB1    |
| hsa-miR-335-5p | FOXD2   |
| hsa-miR-335-5p | MAFF    |
| hsa-miR-335-5p | USF2    |

|                |        |
|----------------|--------|
| hsa-miR-335-5p | SMAD3  |
| hsa-miR-335-5p | BACH2  |
| hsa-miR-335-5p | EBF1   |
| hsa-miR-335-5p | HBP1   |
| hsa-miR-335-5p | CDX2   |
| hsa-miR-335-5p | KLF9   |
| hsa-miR-335-5p | SPDEF  |
| hsa-miR-335-5p | REST   |
| hsa-miR-335-5p | ZNF83  |
| hsa-miR-335-5p | RFX2   |
| hsa-miR-335-5p | ATF2   |
| hsa-miR-335-5p | MYOD1  |
| hsa-miR-335-5p | FOS    |
| hsa-miR-335-5p | POU5F1 |
| hsa-miR-335-5p | SOX17  |
| hsa-miR-335-5p | IL17A  |
| hsa-miR-335-5p | IL6    |
| hsa-miR-335-5p | PTGS2  |
| hsa-miR-335-5p | TLR4   |
| hsa-miR-337-3p | STAT3  |
| hsa-miR-337-3p | TFAM   |
| hsa-miR-337-3p | MTA3   |
| hsa-miR-33a-5p | ZNF217 |
| hsa-miR-33a-5p | CEBPG  |
| hsa-miR-33a-5p | HIF1A  |
| hsa-miR-33a-5p | KLF9   |
| hsa-miR-33a-5p | FOXP1  |
| hsa-miR-33a-5p | MYC    |
| hsa-miR-33a-5p | FOSL1  |
| hsa-miR-33a-5p | SREBF1 |
| hsa-miR-33a-5p | SP1    |
| hsa-miR-34a-5p | MYC    |
| hsa-miR-34a-5p | MYB    |
| hsa-miR-34a-5p | E2F3   |
| hsa-miR-34a-5p | HNF4A  |
| hsa-miR-34a-5p | YY1    |
| hsa-miR-34a-5p | E2F1   |
| hsa-miR-34a-5p | FOXP1  |
| hsa-miR-34a-5p | CEBPB  |
| hsa-miR-34a-5p | SPI1   |

|                 |         |
|-----------------|---------|
| hsa-miR-34a-5p  | NANOG   |
| hsa-miR-34a-5p  | SOX2    |
| hsa-miR-34a-5p  | FOSL1   |
| hsa-miR-34a-5p  | TP53    |
| hsa-miR-34a-5p  | BCLAF1  |
| hsa-miR-34a-5p  | STAT1   |
| hsa-miR-34a-5p  | LEF1    |
| hsa-miR-34a-5p  | ADNP    |
| hsa-miR-34a-5p  | SMARCC1 |
| hsa-miR-34a-5p  | SMARCC2 |
| hsa-miR-34a-5p  | TFAM    |
| hsa-miR-34a-5p  | GATA4   |
| hsa-miR-34a-5p  | AR      |
| hsa-miR-34a-5p  | KLF4    |
| hsa-miR-34a-5p  | POU5F1  |
| hsa-miR-34a-5p  | MAZ     |
| hsa-miR-34a-5p  | SMAD4   |
| hsa-miR-34a-5p  | CLOCK   |
| hsa-miR-34a-5p  | HOXA13  |
| hsa-miR-34b-5p  | CREB1   |
| hsa-miR-34b-5p  | MYB     |
| hsa-miR-34b-5p  | MYC     |
| hsa-miR-34b-5p  | HNF4A   |
| hsa-miR-34b-5p  | HIF1A   |
| hsa-miR-3529-3p | SMAD3   |
| hsa-miR-3529-3p | SOX4    |
| hsa-miR-3529-3p | TFAP2A  |
| hsa-miR-3529-3p | HOXA13  |
| hsa-miR-3529-3p | TP53    |
| hsa-miR-3609    | SP4     |
| hsa-miR-3609    | REST    |
| hsa-miR-3609    | NFAT5   |
| hsa-miR-3609    | TFAM    |
| hsa-miR-3609    | HBP1    |
| hsa-miR-3609    | GATA6   |
| hsa-miR-3609    | RUNX3   |
| hsa-miR-3609    | HIF1A   |
| hsa-miR-3658    | SOX4    |
| hsa-miR-3658    | KLF3    |
| hsa-miR-3658    | IRF2    |

|                 |         |
|-----------------|---------|
| hsa-miR-3658    | TLR4    |
| hsa-miR-365a-3p | PAX6    |
| hsa-miR-365a-3p | MAX     |
| hsa-miR-365a-3p | IL6     |
| hsa-miR-365a-5p | ZKSCAN1 |
| hsa-miR-365a-5p | HINFP   |
| hsa-miR-365a-5p | STAT3   |
| hsa-miR-365b-5p | ZKSCAN1 |
| hsa-miR-365b-5p | HINFP   |
| hsa-miR-365b-5p | STAT3   |
| hsa-miR-3662    | CTCF    |
| hsa-miR-3662    | ETS2    |
| hsa-miR-3662    | HIF1A   |
| hsa-miR-3662    | SOX4    |
| hsa-miR-3668    | HIF1A   |
| hsa-miR-3668    | BACH1   |
| hsa-miR-3668    | ESR1    |
| hsa-miR-3668    | CEBPD   |
| hsa-miR-371b-3p | STAT3   |
| hsa-miR-371b-3p | AFF1    |
| hsa-miR-375     | SP1     |
| hsa-miR-375     | GATA6   |
| hsa-miR-375     | HOXB13  |
| hsa-miR-375     | HEY1    |
| hsa-miR-375     | AEBP2   |
| hsa-miR-375     | TCF12   |
| hsa-miR-375     | MYBL1   |
| hsa-miR-375     | TP53    |
| hsa-miR-375     | MYC     |
| hsa-miR-379-3p  | HOXA10  |
| hsa-miR-379-3p  | NRF1    |
| hsa-miR-379-3p  | TFDP1   |
| hsa-miR-379-3p  | ELK4    |
| hsa-miR-379-3p  | PTGS2   |
| hsa-miR-380-5p  | TP53    |
| hsa-miR-3934-5p | PAX5    |
| hsa-miR-3934-5p | IRF1    |
| hsa-miR-3934-5p | ZKSCAN1 |
| hsa-miR-3934-5p | PTGS2   |
| hsa-miR-424-5p  | MYB     |



|                |        |
|----------------|--------|
| hsa-miR-424-5p | HIF1A  |
| hsa-miR-424-5p | SPI1   |
| hsa-miR-424-5p | CDX2   |
| hsa-miR-424-5p | MAFK   |
| hsa-miR-424-5p | ELK4   |
| hsa-miR-424-5p | GABPA  |
| hsa-miR-424-5p | TFAP2A |
| hsa-miR-424-5p | NFIC   |
| hsa-miR-424-5p | E2F7   |
| hsa-miR-424-5p | HOXA10 |
| hsa-miR-424-5p | MBD4   |
| hsa-miR-424-5p | CREBL2 |
| hsa-miR-4270   | TFDP1  |
| hsa-miR-4270   | ZFHX3  |
| hsa-miR-4270   | STAT3  |
| hsa-miR-4270   | ASCL2  |
| hsa-miR-4271   | TP53   |
| hsa-miR-4271   | MAX    |
| hsa-miR-4271   | E2F3   |
| hsa-miR-4271   | AR     |
| hsa-miR-4271   | FOSL1  |
| hsa-miR-4271   | SREBF1 |
| hsa-miR-4271   | JUND   |
| hsa-miR-4271   | SP1    |
| hsa-miR-4279   | YY1    |
| hsa-miR-4279   | AFF1   |
| hsa-miR-4279   | SOX4   |
| hsa-miR-4279   | E2F2   |
| hsa-miR-4279   | FOXO3  |
| hsa-miR-4279   | HINFP  |
| hsa-miR-4279   | THAP1  |
| hsa-miR-4279   | VDR    |
| hsa-miR-4279   | TLR4   |
| hsa-miR-4282   | HIF1A  |
| hsa-miR-4282   | HBP1   |
| hsa-miR-4282   | RCOR1  |
| hsa-miR-4282   | E2F7   |
| hsa-miR-4282   | NR3C1  |
| hsa-miR-4282   | NFYA   |
| hsa-miR-4282   | SP4    |

|               |        |
|---------------|--------|
| hsa-miR-4286  | HOXA13 |
| hsa-miR-4286  | ZBTB7A |
| hsa-miR-4286  | TP53   |
| hsa-miR-4286  | NFYA   |
| hsa-miR-4286  | SREBF1 |
| hsa-miR-4290  | SMAD3  |
| hsa-miR-4290  | ESR1   |
| hsa-miR-4290  | HOXA13 |
| hsa-miR-4290  | SREBF1 |
| hsa-miR-4306  | BACH1  |
| hsa-miR-4306  | TFDP1  |
| hsa-miR-4306  | TP53   |
| hsa-miR-4306  | MYBL1  |
| hsa-miR-4306  | GATA6  |
| hsa-miR-4306  | HOXC6  |
| hsa-miR-4418  | HBP1   |
| hsa-miR-4418  | ID2    |
| hsa-miR-4418  | TCF7L2 |
| hsa-miR-4418  | HIF1A  |
| hsa-miR-4418  | BACH2  |
| hsa-miR-4419a | TP53   |
| hsa-miR-4419a | SP2    |
| hsa-miR-4419a | PAX5   |
| hsa-miR-4419a | NFAT5  |
| hsa-miR-4419a | MYBL1  |
| hsa-miR-4419a | GATA6  |
| hsa-miR-4419a | NCOR2  |
| hsa-miR-4419a | HOXB13 |
| hsa-miR-4419a | HOXC6  |
| hsa-miR-4419a | NRF1   |
| hsa-miR-4434  | TP53   |
| hsa-miR-4434  | MBD4   |
| hsa-miR-4434  | GATA6  |
| hsa-miR-4434  | REST   |
| hsa-miR-4434  | MAF    |
| hsa-miR-4434  | SOX4   |
| hsa-miR-4434  | BACH2  |
| hsa-miR-4438  | FOS    |
| hsa-miR-4438  | ESR2   |
| hsa-miR-4438  | VDR    |

|                 |         |
|-----------------|---------|
| hsa-miR-4438    | CREB1   |
| hsa-miR-4438    | ZKSCAN1 |
| hsa-miR-4438    | STAT3   |
| hsa-miR-4441    | TFDP1   |
| hsa-miR-4441    | ZFHX3   |
| hsa-miR-4441    | STAT3   |
| hsa-miR-4441    | ASCL2   |
| hsa-miR-4463    | THAP1   |
| hsa-miR-4463    | HIF1A   |
| hsa-miR-4464    | TEAD1   |
| hsa-miR-4464    | KLF9    |
| hsa-miR-4464    | HIF1A   |
| hsa-miR-4464    | GLI2    |
| hsa-miR-4464    | MAZ     |
| hsa-miR-4470    | SOX4    |
| hsa-miR-4470    | ZFHX3   |
| hsa-miR-4470    | LHX4    |
| hsa-miR-4470    | HIF1A   |
| hsa-miR-4487    | ZFX     |
| hsa-miR-4487    | NRF1    |
| hsa-miR-4487    | ZNF250  |
| hsa-miR-4487    | RUNX3   |
| hsa-miR-4487    | HIF1A   |
| hsa-miR-4499    | ZFX     |
| hsa-miR-4499    | HIF1A   |
| hsa-miR-449c-5p | MYC     |
| hsa-miR-449c-5p | HIF1A   |
| hsa-miR-4510    | MYC     |
| hsa-miR-4510    | TP53    |
| hsa-miR-4510    | SP2     |
| hsa-miR-4510    | PAX5    |
| hsa-miR-4510    | NFAT5   |
| hsa-miR-4510    | MYBL1   |
| hsa-miR-4510    | GATA6   |
| hsa-miR-4510    | NCOR2   |
| hsa-miR-4510    | HOXB13  |
| hsa-miR-4510    | HOXC6   |
| hsa-miR-4510    | NRF1    |
| hsa-miR-4516    | STAT3   |
| hsa-miR-4516    | TP53    |

|                 |         |
|-----------------|---------|
| hsa-miR-4516    | MBD4    |
| hsa-miR-4516    | GATA6   |
| hsa-miR-4516    | REST    |
| hsa-miR-4516    | MAF     |
| hsa-miR-4516    | SOX4    |
| hsa-miR-4516    | BACH2   |
| hsa-miR-452-5p  | SMAD4   |
| hsa-miR-452-5p  | LEF1    |
| hsa-miR-452-5p  | TCF4    |
| hsa-miR-452-5p  | REST    |
| hsa-miR-452-5p  | TNF     |
| hsa-miR-4531    | SOX4    |
| hsa-miR-4531    | REST    |
| hsa-miR-4531    | TP53    |
| hsa-miR-4531    | MAF     |
| hsa-miR-4531    | PAX5    |
| hsa-miR-4531    | BACH2   |
| hsa-miR-454-3p  | SMAD4   |
| hsa-miR-454-3p  | ZBTB4   |
| hsa-miR-454-3p  | BHLHE40 |
| hsa-miR-454-3p  | TP53    |
| hsa-miR-454-3p  | SOX4    |
| hsa-miR-454-3p  | HBP1    |
| hsa-miR-454-3p  | YY1     |
| hsa-miR-454-3p  | ESR1    |
| hsa-miR-454-3p  | HOXA5   |
| hsa-miR-454-3p  | TCF7L2  |
| hsa-miR-454-3p  | IRF1    |
| hsa-miR-4644    | BACH1   |
| hsa-miR-4644    | TFDP1   |
| hsa-miR-4644    | TP53    |
| hsa-miR-4644    | MYBL1   |
| hsa-miR-4644    | AR      |
| hsa-miR-4644    | GATA6   |
| hsa-miR-4644    | HOXC6   |
| hsa-miR-4650-5p | TP53    |
| hsa-miR-4651    | NKX2-2  |
| hsa-miR-4651    | UBTF    |
| hsa-miR-4651    | TP53    |
| hsa-miR-4651    | MAX     |

|                  |        |
|------------------|--------|
| hsa-miR-4651     | ZBTB7A |
| hsa-miR-4651     | GLI2   |
| hsa-miR-4659a-3p | ASCL1  |
| hsa-miR-4659a-3p | NFIC   |
| hsa-miR-4659a-3p | VDR    |
| hsa-miR-4659a-3p | TLR4   |
| hsa-miR-4659b-3p | ASCL1  |
| hsa-miR-4659b-3p | NFIC   |
| hsa-miR-4659b-3p | VDR    |
| hsa-miR-4659b-3p | TLR4   |
| hsa-miR-4662a-5p | KDM5A  |
| hsa-miR-4662a-5p | HIF1A  |
| hsa-miR-4682     | TP53   |
| hsa-miR-4684-5p  | STAT3  |
| hsa-miR-4684-5p  | FOSL2  |
| hsa-miR-4684-5p  | ZNF552 |
| hsa-miR-4685-5p  | E2F1   |
| hsa-miR-4685-5p  | STAT3  |
| hsa-miR-4694-3p  | MAFK   |
| hsa-miR-4694-3p  | E2F3   |
| hsa-miR-4694-3p  | TLR4   |
| hsa-miR-4697-3p  | TP53   |
| hsa-miR-4698     | TCF7L2 |
| hsa-miR-4698     | E2F8   |
| hsa-miR-4698     | GATA6  |
| hsa-miR-4698     | E2F2   |
| hsa-miR-4698     | TLR4   |
| hsa-miR-4720-3p  | GATA6  |
| hsa-miR-4720-3p  | TFAP4  |
| hsa-miR-4720-3p  | JUN    |
| hsa-miR-4720-3p  | STAT3  |
| hsa-miR-4725-3p  | TP53   |
| hsa-miR-4725-3p  | MAX    |
| hsa-miR-4725-3p  | E2F3   |
| hsa-miR-4725-3p  | AR     |
| hsa-miR-4725-3p  | FOSL1  |
| hsa-miR-4725-3p  | SREBF1 |
| hsa-miR-4725-3p  | JUND   |
| hsa-miR-4725-3p  | SP1    |
| hsa-miR-4728-5p  | JUN    |

|                 |        |
|-----------------|--------|
| hsa-miR-4728-5p | MAZ    |
| hsa-miR-4728-5p | ZFHX3  |
| hsa-miR-4728-5p | TP53   |
| hsa-miR-4728-5p | NFAT5  |
| hsa-miR-4728-5p | GATA6  |
| hsa-miR-4728-5p | NCOR2  |
| hsa-miR-4728-5p | SREBF1 |
| hsa-miR-4728-5p | CASZ1  |
| hsa-miR-4728-5p | ASCL2  |
| hsa-miR-4728-5p | HOXB13 |
| hsa-miR-4728-5p | CREBL2 |
| hsa-miR-4728-5p | MNT    |
| hsa-miR-4728-5p | NFIC   |
| hsa-miR-4728-5p | NRF1   |
| hsa-miR-4728-5p | ZNF250 |
| hsa-miR-4728-5p | WIZ    |
| hsa-miR-4728-5p | FOSL2  |
| hsa-miR-4728-5p | AHR    |
| hsa-miR-4735-3p | HIF1A  |
| hsa-miR-4735-3p | CREBL2 |
| hsa-miR-4735-3p | IRF2   |
| hsa-miR-4736    | TP53   |
| hsa-miR-4736    | TEAD1  |
| hsa-miR-4736    | HAND1  |
| hsa-miR-4738-3p | TLR4   |
| hsa-miR-4742-3p | ZBTB7A |
| hsa-miR-4742-3p | TLR4   |
| hsa-miR-4748    | TEAD1  |
| hsa-miR-4748    | KLF9   |
| hsa-miR-4748    | HIF1A  |
| hsa-miR-4748    | GLI2   |
| hsa-miR-4748    | MAZ    |
| hsa-miR-4763-3p | TP53   |
| hsa-miR-4763-3p | TEAD1  |
| hsa-miR-4763-3p | SP2    |
| hsa-miR-4763-3p | MBD4   |
| hsa-miR-4763-3p | HAND1  |
| hsa-miR-4768-5p | POU2F2 |
| hsa-miR-4768-5p | STAT3  |
| hsa-miR-4768-5p | ZNF83  |

|                 |        |
|-----------------|--------|
| hsa-miR-4768-5p | SPIB   |
| hsa-miR-4768-5p | STAT5A |
| hsa-miR-4768-5p | HOXA13 |
| hsa-miR-4768-5p | ASCL1  |
| hsa-miR-4778-3p | ASCL1  |
| hsa-miR-4778-3p | NFIC   |
| hsa-miR-4778-3p | STAT3  |
| hsa-miR-4778-3p | JUND   |
| hsa-miR-4778-3p | KDM5A  |
| hsa-miR-4778-3p | AR     |
| hsa-miR-4795-5p | SOX4   |
| hsa-miR-4795-5p | MAZ    |
| hsa-miR-4795-5p | FOXO3  |
| hsa-miR-4795-5p | E2F3   |
| hsa-miR-4795-5p | UBTF   |
| hsa-miR-4795-5p | TP53   |
| hsa-miR-4795-5p | FOXH1  |
| hsa-miR-4799-5p | HIF1A  |
| hsa-miR-4799-5p | SMAD4  |
| hsa-miR-4799-5p | HNF4G  |
| hsa-miR-4804-3p | TFAP4  |
| hsa-miR-4804-3p | JUN    |
| hsa-miR-4804-3p | STAT3  |
| hsa-miR-484     | ZBED4  |
| hsa-miR-484     | HOXA5  |
| hsa-miR-484     | AEBP2  |
| hsa-miR-484     | SREBF1 |
| hsa-miR-484     | TFAM   |
| hsa-miR-484     | ELK4   |
| hsa-miR-484     | YY1    |
| hsa-miR-484     | SRF    |
| hsa-miR-484     | ARID3A |
| hsa-miR-484     | NCOR1  |
| hsa-miR-484     | UBTF   |
| hsa-miR-484     | ZFX    |
| hsa-miR-484     | CDX2   |
| hsa-miR-484     | SP3    |
| hsa-miR-484     | SMAD2  |
| hsa-miR-484     | RFX5   |
| hsa-miR-484     | ZBTB4  |

|                  |        |
|------------------|--------|
| hsa-miR-484      | IL2    |
| hsa-miR-485-5p   | TP53   |
| hsa-miR-485-5p   | THAP1  |
| hsa-miR-485-5p   | WIZ    |
| hsa-miR-485-5p   | FOSL2  |
| hsa-miR-485-5p   | STAT2  |
| hsa-miR-491-5p   | TP53   |
| hsa-miR-491-5p   | SMAD3  |
| hsa-miR-491-5p   | AR     |
| hsa-miR-491-5p   | UBTF   |
| hsa-miR-491-5p   | ASCL2  |
| hsa-miR-491-5p   | HOXC6  |
| hsa-miR-491-5p   | MAZ    |
| hsa-miR-494-3p   | ARNTL  |
| hsa-miR-494-3p   | ATF3   |
| hsa-miR-494-3p   | ZEB1   |
| hsa-miR-494-3p   | MYC    |
| hsa-miR-494-3p   | TFAM   |
| hsa-miR-494-3p   | REST   |
| hsa-miR-494-3p   | HOXA10 |
| hsa-miR-494-3p   | TEAD1  |
| hsa-miR-494-3p   | HIF1A  |
| hsa-miR-5003-5p  | HOXA5  |
| hsa-miR-5003-5p  | TFDP1  |
| hsa-miR-5003-5p  | HOXA13 |
| hsa-miR-5003-5p  | ETS1   |
| hsa-miR-5003-5p  | TP53   |
| hsa-miR-500b-3p  | ZBTB7A |
| hsa-miR-500b-3p  | STAT3  |
| hsa-miR-504-5p   | TP53   |
| hsa-miR-504-5p   | NR2C2  |
| hsa-miR-504-5p   | TFAP2C |
| hsa-miR-504-5p   | HOXA13 |
| hsa-miR-504-5p   | POU2F2 |
| hsa-miR-5089-3p  | FOS    |
| hsa-miR-5089-3p  | HIF1A  |
| hsa-miR-5089-3p  | ELK4   |
| hsa-miR-5089-3p  | SMAD2  |
| hsa-miR-509-3-5p | HBP1   |
| hsa-miR-509-3-5p | ID2    |



|                  |         |
|------------------|---------|
| hsa-miR-509-3-5p | TCF7L2  |
| hsa-miR-509-3-5p | HIF1A   |
| hsa-miR-509-3-5p | BACH2   |
| hsa-miR-509-5p   | HBP1    |
| hsa-miR-509-5p   | ID2     |
| hsa-miR-509-5p   | TCF7L2  |
| hsa-miR-509-5p   | HIF1A   |
| hsa-miR-509-5p   | BACH2   |
| hsa-miR-5094     | HIF1A   |
| hsa-miR-5094     | ZBTB7A  |
| hsa-miR-5095     | FOS     |
| hsa-miR-5095     | ESR2    |
| hsa-miR-5095     | VDR     |
| hsa-miR-5095     | CREB1   |
| hsa-miR-5095     | ZKSCAN1 |
| hsa-miR-5095     | STAT3   |
| hsa-miR-513b-3p  | TP53    |
| hsa-miR-513b-3p  | VEZF1   |
| hsa-miR-5193     | NKX2-2  |
| hsa-miR-5193     | TCF7L2  |
| hsa-miR-5193     | AFF1    |
| hsa-miR-5193     | MAFK    |
| hsa-miR-5193     | ARID3A  |
| hsa-miR-5193     | TP53    |
| hsa-miR-5193     | SPIB    |
| hsa-miR-5193     | AR      |
| hsa-miR-5193     | HOXA13  |
| hsa-miR-5196-3p  | TP53    |
| hsa-miR-5196-3p  | SOX9    |
| hsa-miR-5197-5p  | MYC     |
| hsa-miR-5197-5p  | E2F3    |
| hsa-miR-5197-5p  | AFF1    |
| hsa-miR-5197-5p  | TP53    |
| hsa-miR-5197-5p  | ZFH3    |
| hsa-miR-5197-5p  | HOXA13  |
| hsa-miR-519c-3p  | HIF1A   |
| hsa-miR-519c-3p  | SMAD4   |
| hsa-miR-519c-3p  | SOX4    |
| hsa-miR-519c-3p  | HBP1    |
| hsa-miR-519c-3p  | NFAT5   |

|                 |        |
|-----------------|--------|
| hsa-miR-519c-3p | UBTF   |
| hsa-miR-519c-3p | TFAM   |
| hsa-miR-519c-3p | ZBTB4  |
| hsa-miR-519c-3p | NR2C2  |
| hsa-miR-519c-3p | IRF2   |
| hsa-miR-519c-3p | TFAP4  |
| hsa-miR-519c-3p | TCF7L2 |
| hsa-miR-519c-3p | GATA6  |
| hsa-miR-519c-3p | RUNX3  |
| hsa-miR-519c-3p | NR2F2  |
| hsa-miR-519c-3p | ESR1   |
| hsa-miR-519d-3p | HIF1A  |
| hsa-miR-519d-3p | SMAD4  |
| hsa-miR-519d-3p | KLF3   |
| hsa-miR-519d-3p | SOX4   |
| hsa-miR-519d-3p | HBP1   |
| hsa-miR-519d-3p | SP4    |
| hsa-miR-519d-3p | NFAT5  |
| hsa-miR-519d-3p | WHSC1  |
| hsa-miR-519d-3p | CREB1  |
| hsa-miR-519d-3p | REST   |
| hsa-miR-519d-3p | AFF1   |
| hsa-miR-519d-3p | E2F3   |
| hsa-miR-519d-3p | TFAM   |
| hsa-miR-519d-3p | ZBTB4  |
| hsa-miR-519d-3p | GATA6  |
| hsa-miR-519d-3p | ELK4   |
| hsa-miR-519d-3p | NR2C2  |
| hsa-miR-519d-3p | TCF7L2 |
| hsa-miR-519d-3p | RUNX3  |
| hsa-miR-519d-3p | ZBTB7A |
| hsa-miR-519d-3p | SPIB   |
| hsa-miR-519d-3p | ESR2   |
| hsa-miR-519d-3p | TCF4   |
| hsa-miR-519d-3p | STAT3  |
| hsa-miR-519d-3p | MXI1   |
| hsa-miR-519d-3p | E2F2   |
| hsa-miR-519d-3p | E2F1   |
| hsa-miR-519d-3p | CLOCK  |
| hsa-miR-526b-5p | FOXP1  |

|                  |        |
|------------------|--------|
| hsa-miR-526b-5p  | CLOCK  |
| hsa-miR-526b-5p  | CREB1  |
| hsa-miR-526b-5p  | GATA6  |
| hsa-miR-526b-5p  | TLR4   |
| hsa-miR-548ah-5p | SP4    |
| hsa-miR-548ah-5p | REST   |
| hsa-miR-548ah-5p | NFAT5  |
| hsa-miR-548ah-5p | TFAM   |
| hsa-miR-548ah-5p | HBP1   |
| hsa-miR-548ah-5p | GATA6  |
| hsa-miR-548ah-5p | RUNX3  |
| hsa-miR-548ah-5p | HIF1A  |
| hsa-miR-548g-3p  | MXI1   |
| hsa-miR-548g-3p  | E2F6   |
| hsa-miR-548g-3p  | VEZF1  |
| hsa-miR-548g-3p  | E2F3   |
| hsa-miR-548g-3p  | SMAD2  |
| hsa-miR-548g-3p  | TLR4   |
| hsa-miR-548n     | CEBPB  |
| hsa-miR-548n     | REST   |
| hsa-miR-548n     | ID2    |
| hsa-miR-548n     | STAT3  |
| hsa-miR-548n     | E2F7   |
| hsa-miR-548n     | E2F3   |
| hsa-miR-548n     | BCLAF1 |
| hsa-miR-548n     | KDM5A  |
| hsa-miR-558      | ZFX    |
| hsa-miR-558      | ZNF250 |
| hsa-miR-558      | RUNX3  |
| hsa-miR-558      | HIF1A  |
| hsa-miR-558      | PTGS2  |
| hsa-miR-5581-3p  | FOS    |
| hsa-miR-5581-3p  | STAT3  |
| hsa-miR-5681a    | ID2    |
| hsa-miR-5681a    | STAT3  |
| hsa-miR-5681a    | NFAT5  |
| hsa-miR-5681a    | HOXC6  |
| hsa-miR-5681a    | ZNF83  |
| hsa-miR-5681b    | WHSC1  |
| hsa-miR-5681b    | HIF1A  |

|                |        |
|----------------|--------|
| hsa-miR-5692a  | MAFK   |
| hsa-miR-5692a  | HIF1A  |
| hsa-miR-5692a  | ID2    |
| hsa-miR-5693   | MAZ    |
| hsa-miR-5693   | TP53   |
| hsa-miR-5693   | SPIB   |
| hsa-miR-5693   | GATA6  |
| hsa-miR-5702   | TP53   |
| hsa-miR-5702   | CEBPG  |
| hsa-miR-5702   | SMAD2  |
| hsa-miR-5703   | TP53   |
| hsa-miR-5703   | MBD4   |
| hsa-miR-5703   | GATA6  |
| hsa-miR-5703   | REST   |
| hsa-miR-5703   | MAF    |
| hsa-miR-5703   | SOX4   |
| hsa-miR-5703   | BACH2  |
| hsa-miR-576-3p | SOX4   |
| hsa-miR-576-3p | HIF1A  |
| hsa-miR-576-3p | NFIC   |
| hsa-miR-576-3p | HINFP  |
| hsa-miR-589-3p | HIF1A  |
| hsa-miR-589-3p | AR     |
| hsa-miR-589-5p | PTGS2  |
| hsa-miR-605-5p | TP53   |
| hsa-miR-605-5p | HOXA13 |
| hsa-miR-605-5p | RUNX1  |
| hsa-miR-605-5p | STAT1  |
| hsa-miR-605-5p | NR2C2  |
| hsa-miR-6077   | TEAD1  |
| hsa-miR-6077   | FOS    |
| hsa-miR-6077   | GATA6  |
| hsa-miR-6077   | RELA   |
| hsa-miR-6077   | TLR4   |
| hsa-miR-608    | TP53   |
| hsa-miR-608    | NKX2-2 |
| hsa-miR-608    | UBTF   |
| hsa-miR-608    | MAX    |
| hsa-miR-608    | ZBTB7A |
| hsa-miR-608    | GLI2   |

|              |        |
|--------------|--------|
| hsa-miR-612  | TP53   |
| hsa-miR-612  | RUNX1  |
| hsa-miR-6127 | TP53   |
| hsa-miR-6127 | SP2    |
| hsa-miR-6127 | PAX5   |
| hsa-miR-6127 | NFAT5  |
| hsa-miR-6127 | MYBL1  |
| hsa-miR-6127 | GATA6  |
| hsa-miR-6127 | NCOR2  |
| hsa-miR-6127 | HOXB13 |
| hsa-miR-6127 | HOXC6  |
| hsa-miR-6127 | NRF1   |
| hsa-miR-6129 | TP53   |
| hsa-miR-6129 | SP2    |
| hsa-miR-6129 | PAX5   |
| hsa-miR-6129 | NFAT5  |
| hsa-miR-6129 | MYBL1  |
| hsa-miR-6129 | GATA6  |
| hsa-miR-6129 | NCOR2  |
| hsa-miR-6129 | HOXB13 |
| hsa-miR-6129 | HOXC6  |
| hsa-miR-6129 | NRF1   |
| hsa-miR-6130 | TP53   |
| hsa-miR-6130 | SP2    |
| hsa-miR-6130 | PAX5   |
| hsa-miR-6130 | NFAT5  |
| hsa-miR-6130 | MYBL1  |
| hsa-miR-6130 | GATA6  |
| hsa-miR-6130 | NCOR2  |
| hsa-miR-6130 | HOXB13 |
| hsa-miR-6130 | HOXC6  |
| hsa-miR-6130 | NRF1   |
| hsa-miR-6133 | TP53   |
| hsa-miR-6133 | SP2    |
| hsa-miR-6133 | PAX5   |
| hsa-miR-6133 | NFAT5  |
| hsa-miR-6133 | MYBL1  |
| hsa-miR-6133 | GATA6  |
| hsa-miR-6133 | NCOR2  |
| hsa-miR-6133 | HOXB13 |

|                  |         |
|------------------|---------|
| hsa-miR-6133     | HOXC6   |
| hsa-miR-6133     | NRF1    |
| hsa-miR-618      | NR3C1   |
| hsa-miR-618      | KDM5A   |
| hsa-miR-618      | MAF     |
| hsa-miR-618      | SOX4    |
| hsa-miR-618      | STAT3   |
| hsa-miR-622      | TP53    |
| hsa-miR-622      | MYC     |
| hsa-miR-625-3p   | XBP1    |
| hsa-miR-625-3p   | HIF1A   |
| hsa-miR-630      | SNAI2   |
| hsa-miR-630      | ZFHX3   |
| hsa-miR-630      | TLR4    |
| hsa-miR-633      | JUN     |
| hsa-miR-633      | TGFB1   |
| hsa-miR-6511a-5p | HIF1A   |
| hsa-miR-6511a-5p | UBTF    |
| hsa-miR-6511a-5p | AR      |
| hsa-miR-652-3p   | SMAD2   |
| hsa-miR-652-3p   | CEBPG   |
| hsa-miR-652-3p   | ZBTB4   |
| hsa-miR-652-3p   | NFAT5   |
| hsa-miR-652-3p   | MTA3    |
| hsa-miR-652-3p   | PTGS2   |
| hsa-miR-660-3p   | RXRA    |
| hsa-miR-660-3p   | AFF1    |
| hsa-miR-660-3p   | ZKSCAN1 |
| hsa-miR-660-3p   | MAFK    |
| hsa-miR-660-3p   | ARID3A  |
| hsa-miR-660-3p   | TP53    |
| hsa-miR-660-3p   | SPIB    |
| hsa-miR-660-3p   | AR      |
| hsa-miR-660-3p   | HOXA13  |
| hsa-miR-660-3p   | E2F2    |
| hsa-miR-663a     | JUNB    |
| hsa-miR-663a     | JUND    |
| hsa-miR-663a     | KLF4    |
| hsa-miR-663a     | CEBPB   |
| hsa-miR-663a     | BARHL1  |

|                 |         |
|-----------------|---------|
| hsa-miR-663a    | NKX2-5  |
| hsa-miR-663a    | TGFB1   |
| hsa-miR-6722-3p | TP53    |
| hsa-miR-6722-3p | SP2     |
| hsa-miR-6722-3p | MBD4    |
| hsa-miR-6722-3p | ARID3A  |
| hsa-miR-6731-5p | TFDP1   |
| hsa-miR-6731-5p | TP53    |
| hsa-miR-6731-5p | SP2     |
| hsa-miR-6731-5p | MYBL1   |
| hsa-miR-6731-5p | GATA6   |
| hsa-miR-6731-5p | BARHL1  |
| hsa-miR-6731-5p | NFAT5   |
| hsa-miR-6731-5p | HOXC6   |
| hsa-miR-6731-5p | TFAM    |
| hsa-miR-6731-5p | RUNX3   |
| hsa-miR-6731-5p | AR      |
| hsa-miR-6731-5p | FOSL2   |
| hsa-miR-6749-3p | MAZ     |
| hsa-miR-6749-3p | SP1     |
| hsa-miR-6749-3p | ARID3A  |
| hsa-miR-6749-3p | TP53    |
| hsa-miR-6749-3p | SOX4    |
| hsa-miR-6749-3p | SPI1    |
| hsa-miR-6749-3p | CREBL2  |
| hsa-miR-6749-3p | HOXA13  |
| hsa-miR-6749-3p | SNAI2   |
| hsa-miR-6749-3p | BHLHE40 |
| hsa-miR-6749-3p | BACH2   |
| hsa-miR-6749-3p | NR2F2   |
| hsa-miR-6749-3p | MAFK    |
| hsa-miR-6749-3p | SREBF1  |
| hsa-miR-6751-5p | TP53    |
| hsa-miR-6751-5p | RUNX3   |
| hsa-miR-6752-5p | TP53    |
| hsa-miR-6752-5p | RUNX3   |
| hsa-miR-6754-5p | TFDP1   |
| hsa-miR-6754-5p | ZFH3    |
| hsa-miR-6754-5p | STAT3   |
| hsa-miR-6754-5p | ASCL2   |

|                  |        |
|------------------|--------|
| hsa-miR-6755-5p  | HIF1A  |
| hsa-miR-6755-5p  | POU2F2 |
| hsa-miR-6756-5p  | NKX2-2 |
| hsa-miR-6756-5p  | UBTF   |
| hsa-miR-6756-5p  | TP53   |
| hsa-miR-6756-5p  | ZBTB7A |
| hsa-miR-6756-5p  | NFIC   |
| hsa-miR-6756-5p  | MNT    |
| hsa-miR-6760-5p  | TFDP1  |
| hsa-miR-6760-5p  | TP53   |
| hsa-miR-6760-5p  | STAT3  |
| hsa-miR-6760-5p  | SP2    |
| hsa-miR-6760-5p  | MYBL1  |
| hsa-miR-6760-5p  | GATA6  |
| hsa-miR-6760-5p  | BARHL1 |
| hsa-miR-6760-5p  | NFAT5  |
| hsa-miR-6760-5p  | HOXC6  |
| hsa-miR-6762-3p  | MAZ    |
| hsa-miR-6762-3p  | STAT3  |
| hsa-miR-6766-5p  | NKX2-2 |
| hsa-miR-6766-5p  | UBTF   |
| hsa-miR-6766-5p  | TP53   |
| hsa-miR-6766-5p  | ZBTB7A |
| hsa-miR-6766-5p  | NFIC   |
| hsa-miR-6766-5p  | E2F6   |
| hsa-miR-6766-5p  | MNT    |
| hsa-miR-6778-5p  | TP53   |
| hsa-miR-6778-5p  | E2F6   |
| hsa-miR-6778-5p  | AHR    |
| hsa-miR-6778-5p  | ZMIZ1  |
| hsa-miR-6780b-5p | TP53   |
| hsa-miR-6780b-5p | MAX    |
| hsa-miR-6780b-5p | E2F3   |
| hsa-miR-6780b-5p | AR     |
| hsa-miR-6780b-5p | FOSL1  |
| hsa-miR-6780b-5p | SREBF1 |
| hsa-miR-6780b-5p | JUND   |
| hsa-miR-6780b-5p | SP1    |
| hsa-miR-6785-5p  | JUN    |
| hsa-miR-6785-5p  | MAZ    |



|                 |         |
|-----------------|---------|
| hsa-miR-6785-5p | ZFHX3   |
| hsa-miR-6785-5p | TP53    |
| hsa-miR-6785-5p | NFAT5   |
| hsa-miR-6785-5p | GATA6   |
| hsa-miR-6785-5p | NCOR2   |
| hsa-miR-6785-5p | SREBF1  |
| hsa-miR-6785-5p | CASZ1   |
| hsa-miR-6785-5p | ASCL2   |
| hsa-miR-6785-5p | HOXB13  |
| hsa-miR-6785-5p | CREBL2  |
| hsa-miR-6785-5p | MNT     |
| hsa-miR-6785-5p | NFIC    |
| hsa-miR-6785-5p | NRF1    |
| hsa-miR-6785-5p | ZNF250  |
| hsa-miR-6785-5p | WIZ     |
| hsa-miR-6785-5p | FOSL2   |
| hsa-miR-6785-5p | AHR     |
| hsa-miR-6789-3p | ZKSCAN1 |
| hsa-miR-6789-3p | STAT3   |
| hsa-miR-6797-5p | MAZ     |
| hsa-miR-6797-5p | TP53    |
| hsa-miR-6797-5p | NFIC    |
| hsa-miR-6797-5p | NFAT5   |
| hsa-miR-6797-5p | GATA6   |
| hsa-miR-6797-5p | NCOR2   |
| hsa-miR-6797-5p | NRF1    |
| hsa-miR-6803-5p | TP53    |
| hsa-miR-6803-5p | RUNX3   |
| hsa-miR-6806-5p | HIF1A   |
| hsa-miR-6807-3p | TCF7L2  |
| hsa-miR-6807-3p | HOXA13  |
| hsa-miR-6807-3p | HIF1A   |
| hsa-miR-6807-3p | BACH2   |
| hsa-miR-6807-3p | MXD1    |
| hsa-miR-6807-3p | HINFP   |
| hsa-miR-6807-5p | ZFP42   |
| hsa-miR-6807-5p | AHR     |
| hsa-miR-6807-5p | ESR2    |
| hsa-miR-6807-5p | VDR     |
| hsa-miR-6807-5p | TAL1    |

|                 |        |
|-----------------|--------|
| hsa-miR-6807-5p | FOSL2  |
| hsa-miR-6807-5p | CREB1  |
| hsa-miR-6807-5p | STAT3  |
| hsa-miR-6807-5p | MNT    |
| hsa-miR-6808-5p | MXI1   |
| hsa-miR-6808-5p | ZBTB7A |
| hsa-miR-6808-5p | HIF1A  |
| hsa-miR-6808-5p | THAP1  |
| hsa-miR-6808-5p | FOSL2  |
| hsa-miR-6809-3p | POU2F2 |
| hsa-miR-6809-3p | STAT3  |
| hsa-miR-6809-3p | ZNF83  |
| hsa-miR-6809-3p | ZFX    |
| hsa-miR-6809-3p | ASCL1  |
| hsa-miR-6809-3p | STAT5A |
| hsa-miR-6809-3p | HOXA13 |
| hsa-miR-6809-3p | MTA3   |
| hsa-miR-6809-3p | KDM5A  |
| hsa-miR-6809-3p | ARID3A |
| hsa-miR-6809-3p | AR     |
| hsa-miR-6815-3p | HIF1A  |
| hsa-miR-6815-3p | NFAT5  |
| hsa-miR-6825-5p | TP53   |
| hsa-miR-6825-5p | NFAT5  |
| hsa-miR-6825-5p | MBD4   |
| hsa-miR-6825-5p | FOSL1  |
| hsa-miR-6825-5p | CASZ1  |
| hsa-miR-6825-5p | UBTF   |
| hsa-miR-6825-5p | ASCL2  |
| hsa-miR-6825-5p | MNT    |
| hsa-miR-6825-5p | ZBTB7A |
| hsa-miR-6825-5p | HOXC6  |
| hsa-miR-6833-3p | POU2F2 |
| hsa-miR-6833-3p | STAT3  |
| hsa-miR-6833-3p | ZNF83  |
| hsa-miR-6833-3p | SPIB   |
| hsa-miR-6833-3p | STAT5A |
| hsa-miR-6833-3p | HOXA13 |
| hsa-miR-6833-3p | ASCL1  |
| hsa-miR-6835-5p | MAZ    |

|                 |        |
|-----------------|--------|
| hsa-miR-6835-5p | TP53   |
| hsa-miR-6835-5p | RUNX3  |
| hsa-miR-6837-5p | E2F1   |
| hsa-miR-6837-5p | STAT3  |
| hsa-miR-6842-5p | TP53   |
| hsa-miR-6842-5p | RUNX3  |
| hsa-miR-6845-3p | ZNF83  |
| hsa-miR-6845-3p | MTA3   |
| hsa-miR-6845-3p | SPIB   |
| hsa-miR-6845-3p | SPI1   |
| hsa-miR-6845-3p | NFYA   |
| hsa-miR-6845-3p | HOXA13 |
| hsa-miR-6845-3p | STAT3  |
| hsa-miR-6871-3p | STAT3  |
| hsa-miR-6872-3p | THAP1  |
| hsa-miR-6872-3p | FOS    |
| hsa-miR-6872-3p | HINFP  |
| hsa-miR-6872-3p | STAT3  |
| hsa-miR-6875-3p | ASCL1  |
| hsa-miR-6875-3p | NFIC   |
| hsa-miR-6875-3p | STAT3  |
| hsa-miR-6875-3p | JUND   |
| hsa-miR-6875-3p | HNF4A  |
| hsa-miR-6878-5p | STAT3  |
| hsa-miR-6878-5p | MBD4   |
| hsa-miR-6878-5p | CREBL2 |
| hsa-miR-6878-5p | NFAT5  |
| hsa-miR-6878-5p | HOXC6  |
| hsa-miR-6878-5p | TFAM   |
| hsa-miR-6878-5p | AR     |
| hsa-miR-6878-5p | FOSL2  |
| hsa-miR-6880-5p | MAFK   |
| hsa-miR-6880-5p | MXI1   |
| hsa-miR-6880-5p | ZNF250 |
| hsa-miR-6880-5p | TP53   |
| hsa-miR-6882-5p | SOX4   |
| hsa-miR-6882-5p | E2F2   |
| hsa-miR-6882-5p | FOXO3  |
| hsa-miR-6882-5p | TP53   |
| hsa-miR-6882-5p | TFAP2C |

|                 |        |
|-----------------|--------|
| hsa-miR-6883-5p | JUN    |
| hsa-miR-6883-5p | MAZ    |
| hsa-miR-6883-5p | ZFHX3  |
| hsa-miR-6883-5p | TP53   |
| hsa-miR-6883-5p | NFAT5  |
| hsa-miR-6883-5p | GATA6  |
| hsa-miR-6883-5p | NCOR2  |
| hsa-miR-6883-5p | SREBF1 |
| hsa-miR-6883-5p | CASZ1  |
| hsa-miR-6883-5p | ASCL2  |
| hsa-miR-6883-5p | HOXB13 |
| hsa-miR-6883-5p | CREBL2 |
| hsa-miR-6883-5p | MNT    |
| hsa-miR-6883-5p | NFIC   |
| hsa-miR-6883-5p | NRF1   |
| hsa-miR-6883-5p | ZNF250 |
| hsa-miR-6883-5p | WIZ    |
| hsa-miR-6883-5p | FOSL2  |
| hsa-miR-6883-5p | AHR    |
| hsa-miR-6893-5p | MXI1   |
| hsa-miR-6893-5p | ZBTB7A |
| hsa-miR-6893-5p | HIF1A  |
| hsa-miR-6893-5p | THAP1  |
| hsa-miR-6893-5p | FOSL2  |
| hsa-miR-7-5p    | RELA   |
| hsa-miR-7-5p    | ATF5   |
| hsa-miR-7-5p    | NFYA   |
| hsa-miR-7-5p    | E2F2   |
| hsa-miR-7-5p    | YY1    |
| hsa-miR-7-5p    | KLF4   |
| hsa-miR-7-5p    | MYC    |
| hsa-miR-7-5p    | PAX6   |
| hsa-miR-7-5p    | GATA6  |
| hsa-miR-7-5p    | TLR4   |
| hsa-miR-7110-3p | MTA3   |
| hsa-miR-7110-3p | ARNT   |
| hsa-miR-7110-3p | STAT5A |
| hsa-miR-7110-3p | STAT3  |
| hsa-miR-7110-3p | ASCL1  |
| hsa-miR-7110-5p | TP53   |

|                 |         |
|-----------------|---------|
| hsa-miR-7110-5p | RUNX3   |
| hsa-miR-7113-5p | E2F1    |
| hsa-miR-7113-5p | STAT3   |
| hsa-miR-7113-5p | BHLHE40 |
| hsa-miR-7113-5p | ASCL2   |
| hsa-miR-7150    | TP53    |
| hsa-miR-7150    | TEAD1   |
| hsa-miR-7150    | ETV5    |
| hsa-miR-7150    | HAND1   |
| hsa-miR-7150    | KDM5A   |
| hsa-miR-7151-3p | FOS     |
| hsa-miR-7151-3p | ESR2    |
| hsa-miR-7151-3p | VDR     |
| hsa-miR-7151-3p | CREB1   |
| hsa-miR-7151-3p | ZKSCAN1 |
| hsa-miR-7151-3p | STAT3   |
| hsa-miR-7158-5p | STAT3   |
| hsa-miR-744-5p  | SREBF1  |
| hsa-miR-744-5p  | FOXO3   |
| hsa-miR-744-5p  | CEBPA   |
| hsa-miR-744-5p  | MYC     |
| hsa-miR-744-5p  | BARX1   |
| hsa-miR-744-5p  | PTGS2   |
| hsa-miR-744-5p  | TGFB1   |
| hsa-miR-8052    | ZKSCAN1 |
| hsa-miR-8052    | HINFP   |
| hsa-miR-8052    | STAT3   |
| hsa-miR-8055    | HIF1A   |
| hsa-miR-8055    | THAP1   |
| hsa-miR-8071    | TP53    |
| hsa-miR-8085    | TFDP1   |
| hsa-miR-8085    | TP53    |
| hsa-miR-8085    | SP2     |
| hsa-miR-8085    | MYBL1   |
| hsa-miR-8085    | GATA6   |
| hsa-miR-8085    | BARHL1  |
| hsa-miR-8085    | NFAT5   |
| hsa-miR-8085    | HOXC6   |
| hsa-miR-8085    | TFAM    |
| hsa-miR-8085    | RUNX3   |

|                |        |
|----------------|--------|
| hsa-miR-8085   | AR     |
| hsa-miR-8085   | FOSL2  |
| hsa-miR-874-3p | STAT3  |
| hsa-miR-874-3p | PRDM1  |
| hsa-miR-874-3p | ESR1   |
| hsa-miR-877-3p | CUX1   |
| hsa-miR-877-3p | GMEB2  |
| hsa-miR-877-3p | PBX1   |
| hsa-miR-877-3p | PRDM1  |
| hsa-miR-877-3p | MAZ    |
| hsa-miR-877-3p | MBD3   |
| hsa-miR-877-3p | ARNT   |
| hsa-miR-877-3p | BCLAF1 |
| hsa-miR-877-3p | ZBTB7A |
| hsa-miR-877-3p | E2F2   |
| hsa-miR-877-3p | STAT3  |
| hsa-miR-889-3p | HIF1A  |
| hsa-miR-889-3p | NFAT5  |
| hsa-miR-889-3p | HOXA13 |
| hsa-miR-889-3p | AFF1   |
| hsa-miR-9-5p   | REST   |
| hsa-miR-9-5p   | POU2F2 |
| hsa-miR-9-5p   | BCL6   |
| hsa-miR-9-5p   | ETS1   |
| hsa-miR-9-5p   | PRDM1  |
| hsa-miR-9-5p   | CDX2   |
| hsa-miR-9-5p   | SRF    |
| hsa-miR-9-5p   | ID2    |
| hsa-miR-9-5p   | FOXO3  |
| hsa-miR-9-5p   | ZNF407 |
| hsa-miR-9-5p   | NCOR2  |
| hsa-miR-9-5p   | SPI1   |
| hsa-miR-9-5p   | ELF3   |
| hsa-miR-9-5p   | NKX2-2 |
| hsa-miR-9-5p   | E2F7   |
| hsa-miR-9-5p   | SNAI2  |
| hsa-miR-9-5p   | KLF5   |
| hsa-miR-9-5p   | HBP1   |
| hsa-miR-9-5p   | TAL1   |
| hsa-miR-9-5p   | CREB1  |

|                  |        |
|------------------|--------|
| hsa-miR-9-5p     | FOXP1  |
| hsa-miR-9-5p     | NFAT5  |
| hsa-miR-9-5p     | ESR1   |
| hsa-miR-9-5p     | NFKB1  |
| hsa-miR-922      | SP1    |
| hsa-miR-922      | GABPA  |
| hsa-miR-922      | STAT3  |
| hsa-miR-922      | ETV7   |
| hsa-miR-922      | MBD4   |
| hsa-miR-922      | RUNX1  |
| hsa-miR-922      | MNT    |
| hsa-miR-922      | TFAP2C |
| hsa-miR-92a-1-5p | MAZ    |
| hsa-miR-92a-1-5p | TP53   |
| hsa-miR-92a-1-5p | MYC    |
| hsa-miR-92a-1-5p | BCL11A |
| hsa-miR-92a-1-5p | HAND1  |
| hsa-miR-92a-1-5p | RFX1   |
| hsa-miR-92a-2-5p | TP53   |
| hsa-miR-92a-2-5p | MYC    |
| hsa-miR-92a-2-5p | NKX2-2 |
| hsa-miR-92a-2-5p | AR     |
| hsa-miR-92a-2-5p | FOSL1  |
| hsa-miR-92a-2-5p | SIX5   |
| hsa-miR-92a-2-5p | HOXC6  |
| hsa-miR-92a-3p   | TP63   |
| hsa-miR-92a-3p   | ESR2   |
| hsa-miR-92a-3p   | SMAD4  |
| hsa-miR-92a-3p   | CUX1   |
| hsa-miR-92a-3p   | SETDB1 |
| hsa-miR-92a-3p   | GABPA  |
| hsa-miR-92a-3p   | PBX2   |
| hsa-miR-92a-3p   | HOXA5  |
| hsa-miR-92a-3p   | STAT3  |
| hsa-miR-92a-3p   | WHSC1  |
| hsa-miR-92a-3p   | HES1   |
| hsa-miR-92a-3p   | TFAM   |
| hsa-miR-92a-3p   | MEF2C  |
| hsa-miR-92a-3p   | MYBL2  |
| hsa-miR-92a-3p   | GATA3  |

|                |         |
|----------------|---------|
| hsa-miR-92a-3p | SRF     |
| hsa-miR-92a-3p | SOX4    |
| hsa-miR-92a-3p | E2F3    |
| hsa-miR-92a-3p | MYC     |
| hsa-miR-92a-3p | GATA6   |
| hsa-miR-92a-3p | NFYB    |
| hsa-miR-92a-3p | HOXA13  |
| hsa-miR-92a-3p | NFKB1   |
| hsa-miR-92b-3p | USF1    |
| hsa-miR-92b-3p | GATA6   |
| hsa-miR-92b-3p | SMARCC2 |
| hsa-miR-92b-3p | MAFK    |
| hsa-miR-92b-3p | SOX4    |
| hsa-miR-92b-3p | E2F3    |
| hsa-miR-92b-3p | SMAD3   |
| hsa-miR-92b-3p | MYC     |
| hsa-miR-92b-3p | NFYB    |
| hsa-miR-92b-3p | HOXA13  |
| hsa-miR-93-5p  | E2F1    |
| hsa-miR-93-5p  | IRF1    |
| hsa-miR-93-5p  | SMAD4   |
| hsa-miR-93-5p  | PBX3    |
| hsa-miR-93-5p  | RUNX3   |
| hsa-miR-93-5p  | ZMIZ1   |
| hsa-miR-93-5p  | YY1     |
| hsa-miR-93-5p  | EGR2    |
| hsa-miR-93-5p  | KLF9    |
| hsa-miR-93-5p  | WIZ     |
| hsa-miR-93-5p  | ZNF143  |
| hsa-miR-93-5p  | ZNF217  |
| hsa-miR-93-5p  | STAT3   |
| hsa-miR-93-5p  | ZBTB7A  |
| hsa-miR-93-5p  | ZNF384  |
| hsa-miR-93-5p  | JUN     |
| hsa-miR-93-5p  | XBP1    |
| hsa-miR-93-5p  | GLI3    |
| hsa-miR-93-5p  | ZBTB4   |
| hsa-miR-93-5p  | HIF1A   |
| hsa-miR-93-5p  | KLF3    |
| hsa-miR-93-5p  | SOX4    |



|                |        |
|----------------|--------|
| hsa-miR-93-5p  | HBP1   |
| hsa-miR-93-5p  | SP4    |
| hsa-miR-93-5p  | NFAT5  |
| hsa-miR-93-5p  | WHSC1  |
| hsa-miR-93-5p  | CREB1  |
| hsa-miR-93-5p  | REST   |
| hsa-miR-93-5p  | AFF1   |
| hsa-miR-93-5p  | E2F3   |
| hsa-miR-93-5p  | MXD1   |
| hsa-miR-93-5p  | MYC    |
| hsa-miR-93-5p  | TFAM   |
| hsa-miR-93-5p  | GATA6  |
| hsa-miR-93-5p  | ELK4   |
| hsa-miR-93-5p  | NR2C2  |
| hsa-miR-93-5p  | TCF7L2 |
| hsa-miR-93-5p  | SPIB   |
| hsa-miR-93-5p  | ESR2   |
| hsa-miR-93-5p  | TCF4   |
| hsa-miR-93-5p  | MXI1   |
| hsa-miR-93-5p  | E2F2   |
| hsa-miR-93-5p  | CLOCK  |
| hsa-miR-93-5p  | TGFB1  |
| hsa-miR-935    | NR2F2  |
| hsa-miR-935    | TFDP1  |
| hsa-miR-935    | HIF1A  |
| hsa-miR-937-5p | TP53   |
| hsa-miR-937-5p | FOS    |
| hsa-miR-937-5p | CEBPG  |
| hsa-miR-937-5p | SMAD2  |
| hsa-miR-940    | MYC    |
| hsa-miR-940    | MXI1   |
| hsa-miR-940    | ZBTB7A |
| hsa-miR-940    | HIF1A  |
| hsa-miR-940    | THAP1  |
| hsa-miR-940    | FOSL2  |
| hsa-miR-942-5p | PATZ1  |
| hsa-miR-942-5p | ZFX    |
| hsa-miR-942-5p | ASCL1  |
| hsa-miR-942-5p | SPIB   |
| hsa-miR-942-5p | VDR    |

|                |                 |
|----------------|-----------------|
| hsa-miR-942-5p | TLR4            |
| hsa-miR-98-5p  | E2F1            |
| hsa-miR-98-5p  | E2F2            |
| hsa-miR-98-5p  | MYC             |
| hsa-miR-98-5p  | GATA6           |
| hsa-miR-98-5p  | TEAD4           |
| hsa-miR-98-5p  | AHR             |
| hsa-miR-98-5p  | TEAD1           |
| hsa-miR-98-5p  | CEBPD           |
| hsa-miR-98-5p  | SMARCC1         |
| hsa-miR-98-5p  | MITF            |
| hsa-miR-98-5p  | ZFX             |
| hsa-miR-98-5p  | KLF3            |
| hsa-miR-98-5p  | E2F6            |
| hsa-miR-98-5p  | ZFHX3           |
| hsa-miR-98-5p  | TFAP2A          |
| hsa-miR-98-5p  | SOX4            |
| hsa-miR-98-5p  | ZBED4           |
| hsa-miR-98-5p  | ARID3A          |
| hsa-miR-98-5p  | E2F4            |
| hsa-miR-98-5p  | BACH1           |
| hsa-miR-98-5p  | MXD1            |
| hsa-miR-98-5p  | HAND1           |
| hsa-miR-98-5p  | STAT2           |
| hsa-miR-98-5p  | IL6             |
| hsa-miR-99a-5p | FOSL2           |
| hsa-miR-99a-5p | ZBTB4           |
| hsa-miR-99a-5p | HOXA1           |
| hsa-miR-99a-5p | PTGS2           |
| HSF1           | HIF1A           |
| HSF1           | STAT3           |
| HSF1           | IL10            |
| HSF1           | hsa-miR-937-5p  |
| HSF1           | hsa-miR-9-5p    |
| HSF1           | hsa-miR-6845-3p |
| HSF1           | hsa-miR-6766-5p |
| HSF1           | hsa-miR-663a    |
| HSF1           | hsa-miR-589-5p  |
| HSF1           | hsa-miR-589-3p  |
| HSF1           | hsa-miR-5703    |

|       |                 |
|-------|-----------------|
| HSF1  | hsa-miR-5089-3p |
| HSF1  | hsa-miR-4795-5p |
| HSF1  | hsa-miR-4684-5p |
| HSF1  | hsa-miR-4499    |
| HSF1  | hsa-miR-4470    |
| HSF1  | hsa-miR-4434    |
| HSF1  | hsa-miR-4418    |
| HSF1  | hsa-miR-4290    |
| HSF1  | hsa-miR-320a    |
| HSF1  | hsa-miR-3199    |
| HSF1  | hsa-miR-2682-5p |
| HSF1  | hsa-miR-22-3p   |
| HSF1  | hsa-miR-214-3p  |
| HSF1  | hsa-miR-210-3p  |
| HSF1  | hsa-miR-1972    |
| HSF1  | hsa-miR-150-5p  |
| HSF1  | hsa-miR-137     |
| HSF1  | hsa-miR-130b-3p |
| HSF1  | hsa-miR-1288-5p |
| HSF1  | hsa-miR-1249-5p |
| HSF1  | hsa-miR-124-3p  |
| HSF1  | hsa-let-7a-5p   |
| HSF2  | TGFB1           |
| ID1   | TGFB1           |
| ID2   | TP53            |
| IKZF1 | NFKB1           |
| IKZF1 | TNF             |
| IKZF1 | hsa-let-7a-5p   |
| IKZF1 | hsa-let-7i-5p   |
| IKZF1 | hsa-miR-1207-5p |
| IKZF1 | hsa-miR-128-3p  |
| IKZF1 | hsa-miR-146a-5p |
| IKZF1 | hsa-miR-155-5p  |
| IKZF1 | hsa-miR-21-5p   |
| IKZF1 | hsa-miR-24-3p   |
| IKZF1 | hsa-miR-27a-3p  |
| IKZF1 | hsa-miR-3529-3p |
| IKZF1 | hsa-miR-365a-3p |
| IKZF1 | hsa-miR-365a-5p |
| IKZF1 | hsa-miR-4270    |

|       |                 |
|-------|-----------------|
| IKZF1 | hsa-miR-4736    |
| IKZF1 | hsa-miR-484     |
| IKZF1 | hsa-miR-589-3p  |
| IKZF1 | hsa-miR-589-5p  |
| IKZF1 | hsa-miR-612     |
| IKZF1 | hsa-miR-7-5p    |
| IKZF1 | hsa-miR-5095    |
| IRF1  | HIF1A           |
| IRF1  | STAT3           |
| IRF1  | IL10            |
| IRF1  | IL6             |
| IRF1  | NFKB1           |
| IRF1  | SMAD3           |
| IRF1  | TGFB1           |
| IRF1  | TP53            |
| IRF1  | hsa-miR-1181    |
| IRF1  | hsa-miR-155-5p  |
| IRF1  | hsa-miR-2110    |
| IRF1  | hsa-miR-30e-5p  |
| IRF1  | hsa-miR-3199    |
| IRF1  | hsa-miR-320a    |
| IRF1  | hsa-miR-4470    |
| IRF1  | hsa-miR-4736    |
| IRF1  | hsa-miR-4738-3p |
| IRF1  | hsa-miR-92b-3p  |
| IRF1  | hsa-miR-942-5p  |
| IRF1  | hsa-miR-9-5p    |
| IRF1  | hsa-miR-6875-3p |
| IRF1  | hsa-miR-6872-3p |
| IRF1  | hsa-miR-6789-3p |
| IRF1  | hsa-miR-652-3p  |
| IRF1  | hsa-miR-630     |
| IRF1  | hsa-miR-625-3p  |
| IRF1  | hsa-miR-5095    |
| IRF1  | hsa-miR-4799-5p |
| IRF1  | hsa-miR-4795-5p |
| IRF1  | hsa-miR-4644    |
| IRF1  | hsa-miR-449c-5p |
| IRF1  | hsa-miR-4487    |
| IRF1  | hsa-miR-4441    |

|      |                 |
|------|-----------------|
| IRF1 | hsa-miR-375     |
| IRF1 | hsa-miR-371b-3p |
| IRF1 | hsa-miR-3609    |
| IRF1 | hsa-miR-223-3p  |
| IRF1 | hsa-miR-22-3p   |
| IRF1 | hsa-miR-203a-3p |
| IRF1 | hsa-miR-195-5p  |
| IRF1 | hsa-miR-194-3p  |
| IRF1 | hsa-miR-1908-5p |
| IRF1 | hsa-miR-18a-5p  |
| IRF1 | hsa-miR-18a-3p  |
| IRF1 | hsa-miR-17-5p   |
| IRF1 | hsa-miR-145-5p  |
| IRF1 | hsa-miR-144-3p  |
| IRF1 | hsa-miR-142-3p  |
| IRF1 | hsa-miR-132-3p  |
| IRF2 | HIF1A           |
| IRF2 | NFKB1           |
| IRF2 | TP53            |
| IRF3 | STAT3           |
| IRF3 | TNF             |
| IRF3 | hsa-miR-1-3p    |
| IRF3 | hsa-miR-130b-3p |
| IRF3 | hsa-miR-2110    |
| IRF3 | hsa-miR-4698    |
| IRF3 | hsa-miR-663a    |
| IRF3 | hsa-miR-942-5p  |
| IRF3 | hsa-miR-6809-3p |
| IRF3 | hsa-miR-365a-5p |
| IRF3 | hsa-miR-365a-3p |
| IRF4 | IL17A           |
| IRF4 | NFKB1           |
| IRF4 | STAT3           |
| IRF4 | TGFB1           |
| IRF4 | TLR4            |
| IRF4 | TP53            |
| IRF4 | TNF             |
| IRF4 | hsa-miR-128-3p  |
| IRF4 | hsa-miR-3662    |
| IRF4 | hsa-miR-663a    |

|      |                  |
|------|------------------|
| IRF4 | hsa-miR-9-5p     |
| IRF4 | hsa-miR-6872-3p  |
| IRF4 | hsa-miR-6871-3p  |
| IRF4 | hsa-miR-6760-5p  |
| IRF4 | hsa-miR-6511a-5p |
| IRF4 | hsa-miR-4697-3p  |
| IRF4 | hsa-miR-4434     |
| IRF4 | hsa-miR-4270     |
| IRF4 | hsa-miR-30e-5p   |
| IRF4 | hsa-miR-29b-3p   |
| IRF4 | hsa-miR-139-5p   |
| IRF4 | hsa-miR-130a-3p  |
| IRF4 | hsa-let-7i-5p    |
| IRF4 | hsa-let-7a-5p    |
| IRF5 | HIF1A            |
| IRF5 | IL6              |
| IRF5 | NFKB1            |
| IRF5 | TGFB1            |
| IRF5 | TNF              |
| IRF5 | hsa-miR-9-5p     |
| IRF5 | hsa-miR-6893-5p  |
| IRF5 | hsa-miR-6807-5p  |
| IRF5 | hsa-miR-6807-3p  |
| IRF5 | hsa-miR-625-3p   |
| IRF5 | hsa-miR-589-5p   |
| IRF5 | hsa-miR-589-3p   |
| IRF5 | hsa-miR-5193     |
| IRF5 | hsa-miR-4763-3p  |
| IRF5 | hsa-miR-29b-3p   |
| IRF5 | hsa-miR-27a-3p   |
| IRF5 | hsa-miR-2682-5p  |
| IRF5 | hsa-miR-24-3p    |
| IRF5 | hsa-miR-195-5p   |
| IRF5 | hsa-miR-138-5p   |
| IRF5 | hsa-miR-138-2-3p |
| IRF5 | hsa-miR-137      |
| IRF5 | hsa-miR-124-3p   |
| IRF5 | hsa-miR-101-3p   |
| IRF5 | hsa-let-7b-5p    |
| JUN  | HIF1A            |

|     |                 |
|-----|-----------------|
| JUN | IL10            |
| JUN | PTGS2           |
| JUN | STAT3           |
| JUN | TGFB1           |
| JUN | TP53            |
| JUN | IL2             |
| JUN | IL6             |
| JUN | NFKB1           |
| JUN | SMAD3           |
| JUN | TLR4            |
| JUN | hsa-let-7a-5p   |
| JUN | hsa-miR-100-5p  |
| JUN | hsa-miR-1181    |
| JUN | hsa-miR-1207-5p |
| JUN | hsa-miR-1288-5p |
| JUN | hsa-miR-1296-3p |
| JUN | hsa-miR-132-3p  |
| JUN | hsa-miR-138-5p  |
| JUN | hsa-miR-145-5p  |
| JUN | hsa-miR-155-5p  |
| JUN | hsa-miR-17-5p   |
| JUN | hsa-miR-18a-3p  |
| JUN | hsa-miR-18a-5p  |
| JUN | hsa-miR-1908-5p |
| JUN | hsa-miR-19a-3p  |
| JUN | hsa-miR-20a-5p  |
| JUN | hsa-miR-21-5p   |
| JUN | hsa-miR-2110    |
| JUN | hsa-miR-22-3p   |
| JUN | hsa-miR-24-3p   |
| JUN | hsa-miR-27a-3p  |
| JUN | hsa-miR-30a-5p  |
| JUN | hsa-miR-3165    |
| JUN | hsa-miR-3199    |
| JUN | hsa-miR-320a    |
| JUN | hsa-miR-324-3p  |
| JUN | hsa-miR-324-5p  |
| JUN | hsa-miR-34a-5p  |
| JUN | hsa-miR-3609    |
| JUN | hsa-miR-4282    |

|     |                  |
|-----|------------------|
| JUN | hsa-miR-4434     |
| JUN | hsa-miR-4470     |
| JUN | hsa-miR-4510     |
| JUN | hsa-miR-4651     |
| JUN | hsa-miR-4659a-3p |
| JUN | hsa-miR-4659b-3p |
| JUN | hsa-miR-4720-3p  |
| JUN | hsa-miR-4738-3p  |
| JUN | hsa-miR-4748     |
| JUN | hsa-miR-548g-3p  |
| JUN | hsa-miR-663a     |
| JUN | hsa-miR-744-5p   |
| JUN | hsa-miR-922      |
| JUN | hsa-miR-935      |
| JUN | hsa-miR-942-5p   |
| JUN | hsa-miR-9-5p     |
| JUN | hsa-miR-7113-5p  |
| JUN | hsa-miR-7-5p     |
| JUN | hsa-miR-6875-3p  |
| JUN | hsa-miR-6871-3p  |
| JUN | hsa-miR-6809-3p  |
| JUN | hsa-miR-6780b-5p |
| JUN | hsa-miR-6762-3p  |
| JUN | hsa-miR-6760-5p  |
| JUN | hsa-miR-652-3p   |
| JUN | hsa-miR-625-3p   |
| JUN | hsa-miR-5692a    |
| JUN | hsa-miR-4799-5p  |
| JUN | hsa-miR-4531     |
| JUN | hsa-miR-4487     |
| JUN | hsa-miR-424-5p   |
| JUN | hsa-miR-3934-5p  |
| JUN | hsa-miR-375      |
| JUN | hsa-miR-3662     |
| JUN | hsa-miR-30b-5p   |
| JUN | hsa-miR-26a-5p   |
| JUN | hsa-miR-222-3p   |
| JUN | hsa-miR-210-3p   |
| JUN | hsa-miR-194-3p   |
| JUN | hsa-miR-130b-3p  |



|      |                  |
|------|------------------|
| JUN  | hsa-miR-124-3p   |
| JUN  | hsa-miR-1178-3p  |
| JUNB | HIF1A            |
| JUNB | IL6              |
| JUNB | NFKB1            |
| JUNB | SMAD3            |
| JUNB | STAT3            |
| JUNB | TGFB1            |
| JUNB | TP53             |
| JUNB | hsa-miR-1207-5p  |
| JUNB | hsa-miR-146b-5p  |
| JUNB | hsa-miR-17-5p    |
| JUNB | hsa-miR-1908-5p  |
| JUNB | hsa-miR-4271     |
| JUNB | hsa-miR-4651     |
| JUNB | hsa-miR-4736     |
| JUNB | hsa-miR-9-5p     |
| JUNB | hsa-miR-7-5p     |
| JUNB | hsa-miR-6815-3p  |
| JUNB | hsa-miR-142-3p   |
| JUNB | hsa-miR-138-5p   |
| JUND | HIF1A            |
| JUND | PTGS2            |
| JUND | STAT3            |
| JUND | TLR4             |
| JUND | TP53             |
| JUND | IL6              |
| JUND | NFKB1            |
| JUND | SMAD3            |
| JUND | TGFB1            |
| JUND | hsa-let-7a-5p    |
| JUND | hsa-miR-100-5p   |
| JUND | hsa-miR-106b-3p  |
| JUND | hsa-miR-106b-5p  |
| JUND | hsa-miR-1181     |
| JUND | hsa-miR-128-3p   |
| JUND | hsa-miR-1288-5p  |
| JUND | hsa-miR-1322     |
| JUND | hsa-miR-138-2-3p |
| JUND | hsa-miR-138-5p   |

|      |                 |
|------|-----------------|
| JUND | hsa-miR-145-5p  |
| JUND | hsa-miR-155-5p  |
| JUND | hsa-miR-1908-5p |
| JUND | hsa-miR-21-5p   |
| JUND | hsa-miR-210-3p  |
| JUND | hsa-miR-2110    |
| JUND | hsa-miR-214-3p  |
| JUND | hsa-miR-22-3p   |
| JUND | hsa-miR-221-3p  |
| JUND | hsa-miR-222-3p  |
| JUND | hsa-miR-24-3p   |
| JUND | hsa-miR-25-3p   |
| JUND | hsa-miR-30a-5p  |
| JUND | hsa-miR-30b-5p  |
| JUND | hsa-miR-31-5p   |
| JUND | hsa-miR-3165    |
| JUND | hsa-miR-320a    |
| JUND | hsa-miR-324-3p  |
| JUND | hsa-miR-324-5p  |
| JUND | hsa-miR-34a-5p  |
| JUND | hsa-miR-3668    |
| JUND | hsa-miR-4271    |
| JUND | hsa-miR-4282    |
| JUND | hsa-miR-4434    |
| JUND | hsa-miR-4470    |
| JUND | hsa-miR-4510    |
| JUND | hsa-miR-4651    |
| JUND | hsa-miR-4736    |
| JUND | hsa-miR-4799-5p |
| JUND | hsa-miR-484     |
| JUND | hsa-miR-548g-3p |
| JUND | hsa-miR-605-5p  |
| JUND | hsa-miR-612     |
| JUND | hsa-miR-663a    |
| JUND | hsa-miR-744-5p  |
| JUND | hsa-miR-9-5p    |
| JUND | hsa-miR-93-5p   |
| JUND | hsa-miR-935     |
| JUND | hsa-miR-942-5p  |
| JUND | hsa-miR-92b-3p  |

|      |                  |
|------|------------------|
| JUND | hsa-miR-922      |
| JUND | hsa-miR-7150     |
| JUND | hsa-miR-7-5p     |
| JUND | hsa-miR-6875-3p  |
| JUND | hsa-miR-6872-3p  |
| JUND | hsa-miR-6825-5p  |
| JUND | hsa-miR-6815-3p  |
| JUND | hsa-miR-6809-3p  |
| JUND | hsa-miR-6807-5p  |
| JUND | hsa-miR-6807-3p  |
| JUND | hsa-miR-6797-5p  |
| JUND | hsa-miR-6789-3p  |
| JUND | hsa-miR-6780b-5p |
| JUND | hsa-miR-6760-5p  |
| JUND | hsa-miR-6511a-5p |
| JUND | hsa-miR-618      |
| JUND | hsa-miR-5703     |
| JUND | hsa-miR-5692a    |
| JUND | hsa-miR-5197-5p  |
| JUND | hsa-miR-5193     |
| JUND | hsa-miR-4763-3p  |
| JUND | hsa-miR-4738-3p  |
| JUND | hsa-miR-4659b-3p |
| JUND | hsa-miR-4659a-3p |
| JUND | hsa-miR-4650-5p  |
| JUND | hsa-miR-4531     |
| JUND | hsa-miR-4516     |
| JUND | hsa-miR-449c-5p  |
| JUND | hsa-miR-4487     |
| JUND | hsa-miR-4441     |
| JUND | hsa-miR-4290     |
| JUND | hsa-miR-375      |
| JUND | hsa-miR-371b-3p  |
| JUND | hsa-miR-3662     |
| JUND | hsa-miR-365a-5p  |
| JUND | hsa-miR-365a-3p  |
| JUND | hsa-miR-34b-5p   |
| JUND | hsa-miR-33a-5p   |
| JUND | hsa-miR-3199     |
| JUND | hsa-miR-3160-3p  |

|       |                 |
|-------|-----------------|
| JUND  | hsa-miR-3074-3p |
| JUND  | hsa-miR-29b-3p  |
| JUND  | hsa-miR-27a-3p  |
| JUND  | hsa-miR-26a-5p  |
| JUND  | hsa-miR-223-3p  |
| JUND  | hsa-miR-203a-3p |
| JUND  | hsa-miR-199b-5p |
| JUND  | hsa-miR-199a-5p |
| JUND  | hsa-miR-199a-3p |
| JUND  | hsa-miR-195-5p  |
| JUND  | hsa-miR-193b-3p |
| JUND  | hsa-miR-181a-5p |
| JUND  | hsa-miR-17-5p   |
| JUND  | hsa-miR-153-5p  |
| JUND  | hsa-miR-150-5p  |
| JUND  | hsa-miR-146b-5p |
| JUND  | hsa-miR-1468-3p |
| JUND  | hsa-miR-144-3p  |
| JUND  | hsa-miR-143-3p  |
| JUND  | hsa-miR-139-5p  |
| JUND  | hsa-miR-132-3p  |
| JUND  | hsa-miR-130b-3p |
| JUND  | hsa-miR-130a-3p |
| JUND  | hsa-miR-1296-3p |
| JUND  | hsa-miR-124-3p  |
| JUND  | hsa-miR-1207-5p |
| JUND  | hsa-miR-101-3p  |
| JUND  | hsa-let-7i-5p   |
| JUND  | hsa-let-7b-5p   |
| KDM5A | HIF1A           |
| KDM5A | PTGS2           |
| KDM5A | SMAD3           |
| KDM5A | STAT3           |
| KDM5A | TNF             |
| KDM5A | TP53            |
| KDM5A | hsa-miR-106a-3p |
| KDM5A | hsa-miR-106a-5p |
| KDM5A | hsa-miR-1181    |
| KDM5A | hsa-miR-1468-3p |
| KDM5A | hsa-miR-21-5p   |

|       |                  |
|-------|------------------|
| KDM5A | hsa-miR-211-5p   |
| KDM5A | hsa-miR-33a-5p   |
| KDM5A | hsa-miR-4685-5p  |
| KDM5A | hsa-miR-4697-3p  |
| KDM5A | hsa-miR-519c-3p  |
| KDM5A | hsa-miR-93-5p    |
| KDM5A | hsa-miR-92a-3p   |
| KDM5A | hsa-miR-92a-2-5p |
| KDM5A | hsa-miR-9-5p     |
| KDM5A | hsa-miR-889-3p   |
| KDM5A | hsa-miR-874-3p   |
| KDM5A | hsa-miR-8055     |
| KDM5A | hsa-miR-8052     |
| KDM5A | hsa-miR-7151-3p  |
| KDM5A | hsa-miR-7150     |
| KDM5A | hsa-miR-7113-5p  |
| KDM5A | hsa-miR-7110-5p  |
| KDM5A | hsa-miR-7110-3p  |
| KDM5A | hsa-miR-7-5p     |
| KDM5A | hsa-miR-6882-5p  |
| KDM5A | hsa-miR-6871-3p  |
| KDM5A | hsa-miR-6780b-5p |
| KDM5A | hsa-miR-6766-5p  |
| KDM5A | hsa-miR-6760-5p  |
| KDM5A | hsa-miR-6756-5p  |
| KDM5A | hsa-miR-652-3p   |
| KDM5A | hsa-miR-625-3p   |
| KDM5A | hsa-miR-6129     |
| KDM5A | hsa-miR-576-3p   |
| KDM5A | hsa-miR-519d-3p  |
| KDM5A | hsa-miR-504-5p   |
| KDM5A | hsa-miR-5003-5p  |
| KDM5A | hsa-miR-491-5p   |
| KDM5A | hsa-miR-485-5p   |
| KDM5A | hsa-miR-4768-5p  |
| KDM5A | hsa-miR-4742-3p  |
| KDM5A | hsa-miR-4728-5p  |
| KDM5A | hsa-miR-4725-3p  |
| KDM5A | hsa-miR-4720-3p  |
| KDM5A | hsa-miR-4694-3p  |

|       |                  |
|-------|------------------|
| KDM5A | hsa-miR-4682     |
| KDM5A | hsa-miR-4659b-3p |
| KDM5A | hsa-miR-4659a-3p |
| KDM5A | hsa-miR-4419a    |
| KDM5A | hsa-miR-4418     |
| KDM5A | hsa-miR-4306     |
| KDM5A | hsa-miR-4290     |
| KDM5A | hsa-miR-4286     |
| KDM5A | hsa-miR-3934-5p  |
| KDM5A | hsa-miR-380-5p   |
| KDM5A | hsa-miR-365b-5p  |
| KDM5A | hsa-miR-3529-3p  |
| KDM5A | hsa-miR-34b-5p   |
| KDM5A | hsa-miR-329-5p   |
| KDM5A | hsa-miR-3199     |
| KDM5A | hsa-miR-3160-3p  |
| KDM5A | hsa-miR-30e-5p   |
| KDM5A | hsa-miR-29b-3p   |
| KDM5A | hsa-miR-26a-5p   |
| KDM5A | hsa-miR-25-3p    |
| KDM5A | hsa-miR-20b-5p   |
| KDM5A | hsa-miR-19b-3p   |
| KDM5A | hsa-miR-199b-5p  |
| KDM5A | hsa-miR-195-5p   |
| KDM5A | hsa-miR-18b-5p   |
| KDM5A | hsa-miR-185-5p   |
| KDM5A | hsa-miR-153-5p   |
| KDM5A | hsa-miR-150-5p   |
| KDM5A | hsa-miR-146b-5p  |
| KDM5A | hsa-miR-146a-5p  |
| KDM5A | hsa-miR-145-5p   |
| KDM5A | hsa-miR-144-3p   |
| KDM5A | hsa-miR-139-5p   |
| KDM5A | hsa-miR-1322     |
| KDM5A | hsa-miR-130a-3p  |
| KDM5A | hsa-miR-128-3p   |
| KDM5A | hsa-miR-1273f    |
| KDM5A | hsa-miR-125b-5p  |
| KDM5A | hsa-miR-1249-5p  |
| KDM5A | hsa-miR-124-3p   |

|       |                  |
|-------|------------------|
| KDM5A | hsa-miR-1234-3p  |
| KDM5A | hsa-miR-106b-5p  |
| KDM5A | hsa-miR-106b-3p  |
| KDM5B | HIF1A            |
| KDM5B | IL6              |
| KDM5B | NFKB1            |
| KDM5B | PTGS2            |
| KDM5B | STAT3            |
| KDM5B | TGFB1            |
| KDM5B | TP53             |
| KDM5B | TNF              |
| KDM5B | hsa-let-7i-5p    |
| KDM5B | hsa-miR-10b-5p   |
| KDM5B | hsa-miR-1181     |
| KDM5B | hsa-miR-138-5p   |
| KDM5B | hsa-miR-1909-3p  |
| KDM5B | hsa-miR-200a-3p  |
| KDM5B | hsa-miR-2110     |
| KDM5B | hsa-miR-24-3p    |
| KDM5B | hsa-miR-4470     |
| KDM5B | hsa-miR-922      |
| KDM5B | hsa-miR-92b-3p   |
| KDM5B | hsa-miR-937-5p   |
| KDM5B | hsa-miR-9-5p     |
| KDM5B | hsa-miR-8085     |
| KDM5B | hsa-miR-8052     |
| KDM5B | hsa-miR-7150     |
| KDM5B | hsa-miR-7113-5p  |
| KDM5B | hsa-miR-6893-5p  |
| KDM5B | hsa-miR-6872-3p  |
| KDM5B | hsa-miR-6845-3p  |
| KDM5B | hsa-miR-6842-5p  |
| KDM5B | hsa-miR-6825-5p  |
| KDM5B | hsa-miR-6780b-5p |
| KDM5B | hsa-miR-6752-5p  |
| KDM5B | hsa-miR-660-3p   |
| KDM5B | hsa-miR-589-5p   |
| KDM5B | hsa-miR-589-3p   |
| KDM5B | hsa-miR-5703     |
| KDM5B | hsa-miR-5581-3p  |

|       |                  |
|-------|------------------|
| KDM5B | hsa-miR-5089-3p  |
| KDM5B | hsa-miR-504-5p   |
| KDM5B | hsa-miR-500b-3p  |
| KDM5B | hsa-miR-4763-3p  |
| KDM5B | hsa-miR-4736     |
| KDM5B | hsa-miR-4728-5p  |
| KDM5B | hsa-miR-4684-5p  |
| KDM5B | hsa-miR-4659b-3p |
| KDM5B | hsa-miR-4659a-3p |
| KDM5B | hsa-miR-4644     |
| KDM5B | hsa-miR-4531     |
| KDM5B | hsa-miR-4487     |
| KDM5B | hsa-miR-4441     |
| KDM5B | hsa-miR-4434     |
| KDM5B | hsa-miR-3934-5p  |
| KDM5B | hsa-miR-34b-5p   |
| KDM5B | hsa-miR-329-5p   |
| KDM5B | hsa-miR-3199     |
| KDM5B | hsa-miR-30e-5p   |
| KDM5B | hsa-miR-30d-5p   |
| KDM5B | hsa-miR-3065-5p  |
| KDM5B | hsa-miR-27a-3p   |
| KDM5B | hsa-miR-2682-5p  |
| KDM5B | hsa-miR-223-3p   |
| KDM5B | hsa-miR-22-3p    |
| KDM5B | hsa-miR-199a-5p  |
| KDM5B | hsa-miR-199a-3p  |
| KDM5B | hsa-miR-195-5p   |
| KDM5B | hsa-miR-194-3p   |
| KDM5B | hsa-miR-153-5p   |
| KDM5B | hsa-miR-151a-3p  |
| KDM5B | hsa-miR-149-5p   |
| KDM5B | hsa-miR-149-3p   |
| KDM5B | hsa-miR-146b-5p  |
| KDM5B | hsa-miR-142-3p   |
| KDM5B | hsa-miR-138-2-3p |
| KDM5B | hsa-miR-137      |
| KDM5B | hsa-miR-132-3p   |
| KDM5B | hsa-miR-130a-3p  |
| KDM5B | hsa-miR-1273f    |



|       |                 |
|-------|-----------------|
| KDM5B | hsa-miR-1249-5p |
| KDM5B | hsa-miR-124-3p  |
| KDM5B | hsa-miR-1-3p    |
| KDM5B | hsa-let-7b-5p   |
| KDM5B | hsa-let-7a-5p   |
| KLF1  | HIF1A           |
| KLF1  | NFKB1           |
| KLF1  | PTGS2           |
| KLF1  | STAT3           |
| KLF1  | TLR4            |
| KLF1  | TP53            |
| KLF1  | hsa-miR-6797-5p |
| KLF1  | hsa-miR-6785-5p |
| KLF1  | hsa-miR-625-3p  |
| KLF1  | hsa-miR-4795-5p |
| KLF1  | hsa-miR-4748    |
| KLF1  | hsa-miR-4271    |
| KLF1  | hsa-miR-33a-5p  |
| KLF1  | hsa-miR-145-5p  |
| KLF1  | hsa-miR-144-3p  |
| KLF1  | hsa-miR-143-3p  |
| KLF1  | hsa-miR-1322    |
| KLF3  | HIF1A           |
| KLF4  | HIF1A           |
| KLF4  | NFKB1           |
| KLF4  | STAT3           |
| KLF4  | TGFB1           |
| KLF4  | TP53            |
| KLF4  | hsa-miR-937-5p  |
| KLF4  | hsa-miR-8071    |
| KLF4  | hsa-miR-6835-5p |
| KLF4  | hsa-miR-6833-3p |
| KLF4  | hsa-miR-6803-5p |
| KLF4  | hsa-miR-5692a   |
| KLF4  | hsa-miR-5003-5p |
| KLF4  | hsa-miR-4725-3p |
| KLF4  | hsa-miR-4279    |
| KLF4  | hsa-miR-365b-5p |
| KLF4  | hsa-miR-3160-3p |
| KLF4  | hsa-miR-3074-3p |

|      |                 |
|------|-----------------|
| KLF4 | hsa-miR-24-3p   |
| KLF4 | hsa-miR-1207-5p |
| KLF4 | hsa-miR-107     |
| KLF5 | HIF1A           |
| KLF5 | NFKB1           |
| KLF5 | PTGS2           |
| KLF5 | SMAD3           |
| KLF5 | STAT3           |
| KLF5 | TGFB1           |
| KLF5 | TP53            |
| KLF5 | hsa-let-7a-5p   |
| KLF5 | hsa-miR-1-3p    |
| KLF5 | hsa-miR-124-3p  |
| KLF5 | hsa-miR-138-5p  |
| KLF5 | hsa-miR-194-3p  |
| KLF5 | hsa-miR-199b-5p |
| KLF5 | hsa-miR-21-5p   |
| KLF5 | hsa-miR-26b-5p  |
| KLF5 | hsa-miR-30d-5p  |
| KLF5 | hsa-miR-622     |
| KLF5 | hsa-miR-9-5p    |
| KLF5 | hsa-miR-889-3p  |
| KLF5 | hsa-miR-8071    |
| KLF5 | hsa-miR-6872-3p |
| KLF5 | hsa-miR-6835-5p |
| KLF5 | hsa-miR-6815-3p |
| KLF5 | hsa-miR-519d-3p |
| KLF5 | hsa-miR-4763-3p |
| KLF5 | hsa-miR-4738-3p |
| KLF5 | hsa-miR-4516    |
| KLF5 | hsa-miR-449c-5p |
| KLF5 | hsa-miR-4434    |
| KLF5 | hsa-miR-4271    |
| KLF5 | hsa-miR-375     |
| KLF5 | hsa-miR-371b-3p |
| KLF5 | hsa-miR-3668    |
| KLF5 | hsa-miR-3199    |
| KLF5 | hsa-miR-203a-3p |
| KLF5 | hsa-miR-200a-3p |
| KLF5 | hsa-miR-1908-5p |

|      |                  |
|------|------------------|
| KLF5 | hsa-miR-144-3p   |
| KLF5 | hsa-miR-130b-3p  |
| KLF5 | hsa-let-7b-5p    |
| KLF9 | HIF1A            |
| KLF9 | NFKB1            |
| KLF9 | SMAD3            |
| KLF9 | STAT3            |
| KLF9 | TGFB1            |
| KLF9 | TP53             |
| LEF1 | HIF1A            |
| LEF1 | NFKB1            |
| LEF1 | STAT3            |
| LEF1 | hsa-miR-940      |
| LEF1 | hsa-miR-935      |
| LEF1 | hsa-miR-9-5p     |
| LEF1 | hsa-miR-877-3p   |
| LEF1 | hsa-miR-8071     |
| LEF1 | hsa-miR-6893-5p  |
| LEF1 | hsa-miR-6882-5p  |
| LEF1 | hsa-miR-6875-3p  |
| LEF1 | hsa-miR-6845-3p  |
| LEF1 | hsa-miR-6511a-5p |
| LEF1 | hsa-miR-449c-5p  |
| LEF1 | hsa-miR-4434     |
| LEF1 | hsa-miR-34b-5p   |
| LEF1 | hsa-miR-210-3p   |
| LEF1 | hsa-miR-1909-3p  |
| LEF1 | hsa-miR-185-5p   |
| LEF1 | hsa-miR-181c-5p  |
| LEF1 | hsa-miR-138-5p   |
| LEF1 | hsa-miR-132-3p   |
| LEF1 | hsa-miR-124-3p   |
| LEF1 | hsa-miR-1234-3p  |
| LHX2 | HIF1A            |
| LHX4 | IL10             |
| LYL1 | HIF1A            |
| LYL1 | PTGS2            |
| LYL1 | SMAD3            |
| LYL1 | STAT3            |
| LYL1 | TP53             |

|      |                  |
|------|------------------|
| LYL1 | hsa-miR-92a-3p   |
| LYL1 | hsa-miR-92a-1-5p |
| LYL1 | hsa-miR-6872-3p  |
| LYL1 | hsa-miR-6825-5p  |
| LYL1 | hsa-miR-6797-5p  |
| LYL1 | hsa-miR-6751-5p  |
| LYL1 | hsa-miR-4795-5p  |
| LYL1 | hsa-miR-20a-5p   |
| LYL1 | hsa-miR-19b-3p   |
| LYL1 | hsa-miR-19a-3p   |
| LYL1 | hsa-miR-18a-5p   |
| LYL1 | hsa-miR-18a-3p   |
| LYL1 | hsa-miR-17-5p    |
| LYL1 | hsa-let-7a-5p    |
| MAF  | HIF1A            |
| MAFB | HIF1A            |
| MAFB | PTGS2            |
| MAFF | HIF1A            |
| MAFF | IL10             |
| MAFF | IL6              |
| MAFF | SMAD3            |
| MAFF | STAT3            |
| MAFF | TP53             |
| MAFF | hsa-miR-106a-3p  |
| MAFF | hsa-miR-106a-5p  |
| MAFF | hsa-miR-106b-3p  |
| MAFF | hsa-miR-106b-5p  |
| MAFF | hsa-miR-155-5p   |
| MAFF | hsa-miR-17-5p    |
| MAFF | hsa-miR-18a-3p   |
| MAFF | hsa-miR-18a-5p   |
| MAFF | hsa-miR-19a-3p   |
| MAFF | hsa-miR-20a-5p   |
| MAFF | hsa-miR-2110     |
| MAFF | hsa-miR-320a     |
| MAFF | hsa-miR-4271     |
| MAFF | hsa-miR-4651     |
| MAFF | hsa-miR-4738-3p  |
| MAFF | hsa-miR-558      |
| MAFF | hsa-miR-889-3p   |

|      |                 |
|------|-----------------|
| MAFF | hsa-miR-93-5p   |
| MAFF | hsa-miR-6760-5p |
| MAFF | hsa-miR-5702    |
| MAFK | HIF1A           |
| MAFK | IL10            |
| MAFK | IL17A           |
| MAFK | IL6             |
| MAFK | PTGS2           |
| MAFK | SMAD3           |
| MAFK | STAT3           |
| MAFK | TGFB1           |
| MAFK | TLR4            |
| MAFK | TP53            |
| MAFK | hsa-let-7i-5p   |
| MAFK | hsa-miR-1-3p    |
| MAFK | hsa-miR-106a-3p |
| MAFK | hsa-miR-106a-5p |
| MAFK | hsa-miR-106b-3p |
| MAFK | hsa-miR-106b-5p |
| MAFK | hsa-miR-107     |
| MAFK | hsa-miR-1288-5p |
| MAFK | hsa-miR-1296-3p |
| MAFK | hsa-miR-130a-3p |
| MAFK | hsa-miR-1322    |
| MAFK | hsa-miR-142-3p  |
| MAFK | hsa-miR-1468-3p |
| MAFK | hsa-miR-155-5p  |
| MAFK | hsa-miR-17-5p   |
| MAFK | hsa-miR-18a-3p  |
| MAFK | hsa-miR-18a-5p  |
| MAFK | hsa-miR-18b-5p  |
| MAFK | hsa-miR-1908-5p |
| MAFK | hsa-miR-19a-3p  |
| MAFK | hsa-miR-20b-5p  |
| MAFK | hsa-miR-21-5p   |
| MAFK | hsa-miR-2110    |
| MAFK | hsa-miR-22-3p   |
| MAFK | hsa-miR-25-3p   |
| MAFK | hsa-miR-320a    |
| MAFK | hsa-miR-365a-3p |

|      |                  |
|------|------------------|
| MAFK | hsa-miR-365a-5p  |
| MAFK | hsa-miR-4271     |
| MAFK | hsa-miR-4282     |
| MAFK | hsa-miR-4531     |
| MAFK | hsa-miR-4651     |
| MAFK | hsa-miR-4659a-3p |
| MAFK | hsa-miR-4659b-3p |
| MAFK | hsa-miR-4736     |
| MAFK | hsa-miR-4738-3p  |
| MAFK | hsa-miR-4799-5p  |
| MAFK | hsa-miR-484      |
| MAFK | hsa-miR-93-5p    |
| MAFK | hsa-miR-92b-3p   |
| MAFK | hsa-miR-7158-5p  |
| MAFK | hsa-miR-6872-3p  |
| MAFK | hsa-miR-6833-3p  |
| MAFK | hsa-miR-6815-3p  |
| MAFK | hsa-miR-618      |
| MAFK | hsa-miR-5703     |
| MAFK | hsa-miR-5581-3p  |
| MAFK | hsa-miR-519c-3p  |
| MAFK | hsa-miR-5193     |
| MAFK | hsa-miR-504-5p   |
| MAFK | hsa-miR-4795-5p  |
| MAFK | hsa-miR-449c-5p  |
| MAFK | hsa-miR-4487     |
| MAFK | hsa-miR-4441     |
| MAFK | hsa-miR-4434     |
| MAFK | hsa-miR-4290     |
| MAFK | hsa-miR-371b-3p  |
| MAFK | hsa-miR-34a-5p   |
| MAFK | hsa-miR-335-5p   |
| MAFK | hsa-miR-3199     |
| MAFK | hsa-miR-3128     |
| MAFK | hsa-miR-31-5p    |
| MAFK | hsa-miR-26a-5p   |
| MAFK | hsa-miR-223-3p   |
| MAFK | hsa-miR-199b-5p  |
| MAFK | hsa-miR-199a-5p  |
| MAFK | hsa-miR-199a-3p  |

|      |                  |
|------|------------------|
| MAFK | hsa-miR-193b-3p  |
| MAFK | hsa-miR-16-5p    |
| MAFK | hsa-miR-15b-5p   |
| MAFK | hsa-miR-132-3p   |
| MAFK | hsa-miR-130b-3p  |
| MAFK | hsa-miR-1249-5p  |
| MAFK | hsa-let-7a-5p    |
| MAX  | HIF1A            |
| MAX  | IL6              |
| MAX  | NFKB1            |
| MAX  | PTGS2            |
| MAX  | SMAD3            |
| MAX  | STAT3            |
| MAX  | TGFB1            |
| MAX  | TLR4             |
| MAX  | TNF              |
| MAX  | TP53             |
| MAX  | hsa-let-7a-5p    |
| MAX  | hsa-let-7i-5p    |
| MAX  | hsa-miR-1207-5p  |
| MAX  | hsa-miR-124-3p   |
| MAX  | hsa-miR-132-3p   |
| MAX  | hsa-miR-138-2-3p |
| MAX  | hsa-miR-138-5p   |
| MAX  | hsa-miR-142-3p   |
| MAX  | hsa-miR-144-3p   |
| MAX  | hsa-miR-145-5p   |
| MAX  | hsa-miR-155-5p   |
| MAX  | hsa-miR-17-5p    |
| MAX  | hsa-miR-18a-3p   |
| MAX  | hsa-miR-18a-5p   |
| MAX  | hsa-miR-1908-5p  |
| MAX  | hsa-miR-19a-3p   |
| MAX  | hsa-miR-20a-5p   |
| MAX  | hsa-miR-21-5p    |
| MAX  | hsa-miR-22-3p    |
| MAX  | hsa-miR-223-3p   |
| MAX  | hsa-miR-320a     |
| MAX  | hsa-miR-337-3p   |
| MAX  | hsa-miR-4279     |

|     |                  |
|-----|------------------|
| MAX | hsa-miR-4441     |
| MAX | hsa-miR-4470     |
| MAX | hsa-miR-4736     |
| MAX | hsa-miR-4738-3p  |
| MAX | hsa-miR-484      |
| MAX | hsa-miR-92b-3p   |
| MAX | hsa-miR-935      |
| MAX | hsa-miR-942-5p   |
| MAX | hsa-miR-93-5p    |
| MAX | hsa-miR-9-5p     |
| MAX | hsa-miR-8085     |
| MAX | hsa-miR-7-5p     |
| MAX | hsa-miR-6875-3p  |
| MAX | hsa-miR-6872-3p  |
| MAX | hsa-miR-6871-3p  |
| MAX | hsa-miR-6833-3p  |
| MAX | hsa-miR-6825-5p  |
| MAX | hsa-miR-6815-3p  |
| MAX | hsa-miR-6809-3p  |
| MAX | hsa-miR-6789-3p  |
| MAX | hsa-miR-6760-5p  |
| MAX | hsa-miR-663a     |
| MAX | hsa-miR-612      |
| MAX | hsa-miR-5703     |
| MAX | hsa-miR-5197-5p  |
| MAX | hsa-miR-5196-3p  |
| MAX | hsa-miR-5193     |
| MAX | hsa-miR-504-5p   |
| MAX | hsa-miR-4799-5p  |
| MAX | hsa-miR-4795-5p  |
| MAX | hsa-miR-4659b-3p |
| MAX | hsa-miR-4659a-3p |
| MAX | hsa-miR-4651     |
| MAX | hsa-miR-4531     |
| MAX | hsa-miR-449c-5p  |
| MAX | hsa-miR-4487     |
| MAX | hsa-miR-4434     |
| MAX | hsa-miR-4282     |
| MAX | hsa-miR-3934-5p  |
| MAX | hsa-miR-379-3p   |



|     |                 |
|-----|-----------------|
| MAX | hsa-miR-375     |
| MAX | hsa-miR-371b-3p |
| MAX | hsa-miR-365a-5p |
| MAX | hsa-miR-365a-3p |
| MAX | hsa-miR-34b-5p  |
| MAX | hsa-miR-34a-5p  |
| MAX | hsa-miR-33a-5p  |
| MAX | hsa-miR-3199    |
| MAX | hsa-miR-3165    |
| MAX | hsa-miR-3128    |
| MAX | hsa-miR-31-5p   |
| MAX | hsa-miR-3074-3p |
| MAX | hsa-miR-3065-5p |
| MAX | hsa-miR-27a-3p  |
| MAX | hsa-miR-2682-5p |
| MAX | hsa-miR-25-3p   |
| MAX | hsa-miR-24-3p   |
| MAX | hsa-miR-2110    |
| MAX | hsa-miR-211-5p  |
| MAX | hsa-miR-210-3p  |
| MAX | hsa-miR-203a-3p |
| MAX | hsa-miR-200a-3p |
| MAX | hsa-miR-19b-3p  |
| MAX | hsa-miR-199b-5p |
| MAX | hsa-miR-199a-5p |
| MAX | hsa-miR-199a-3p |
| MAX | hsa-miR-195-5p  |
| MAX | hsa-miR-194-3p  |
| MAX | hsa-miR-193b-3p |
| MAX | hsa-miR-153-5p  |
| MAX | hsa-miR-150-5p  |
| MAX | hsa-miR-149-5p  |
| MAX | hsa-miR-149-3p  |
| MAX | hsa-miR-146b-5p |
| MAX | hsa-miR-146a-5p |
| MAX | hsa-miR-143-3p  |
| MAX | hsa-miR-139-5p  |
| MAX | hsa-miR-137     |
| MAX | hsa-miR-1322    |
| MAX | hsa-miR-130a-3p |

|     |                 |
|-----|-----------------|
| MAX | hsa-miR-1288-5p |
| MAX | hsa-miR-128-3p  |
| MAX | hsa-miR-1273f   |
| MAX | hsa-miR-125b-5p |
| MAX | hsa-miR-1181    |
| MAX | hsa-miR-10b-5p  |
| MAX | hsa-miR-106b-5p |
| MAX | hsa-miR-106b-3p |
| MAZ | HIF1A           |
| MAZ | IL6             |
| MAZ | NFKB1           |
| MAZ | PTGS2           |
| MAZ | SMAD3           |
| MAZ | STAT3           |
| MAZ | TGFB1           |
| MAZ | TNF             |
| MAZ | TP53            |
| MAZ | hsa-miR-130a-3p |
| MAZ | hsa-miR-130b-3p |
| MAZ | hsa-miR-1322    |
| MAZ | hsa-miR-143-3p  |
| MAZ | hsa-miR-150-5p  |
| MAZ | hsa-miR-199b-5p |
| MAZ | hsa-miR-2110    |
| MAZ | hsa-miR-22-3p   |
| MAZ | hsa-miR-320a    |
| MAZ | hsa-miR-3662    |
| MAZ | hsa-miR-4271    |
| MAZ | hsa-miR-449c-5p |
| MAZ | hsa-miR-9-5p    |
| MAZ | hsa-miR-877-3p  |
| MAZ | hsa-miR-8052    |
| MAZ | hsa-miR-6875-3p |
| MAZ | hsa-miR-6833-3p |
| MAZ | hsa-miR-6809-3p |
| MAZ | hsa-miR-6806-5p |
| MAZ | hsa-miR-6785-5p |
| MAZ | hsa-miR-6762-3p |
| MAZ | hsa-miR-633     |
| MAZ | hsa-miR-5094    |

|      |                  |
|------|------------------|
| MAZ  | hsa-miR-504-5p   |
| MAZ  | hsa-miR-4763-3p  |
| MAZ  | hsa-miR-4736     |
| MAZ  | hsa-miR-4659b-3p |
| MAZ  | hsa-miR-4659a-3p |
| MAZ  | hsa-miR-4487     |
| MAZ  | hsa-miR-4441     |
| MAZ  | hsa-miR-379-3p   |
| MAZ  | hsa-miR-365a-5p  |
| MAZ  | hsa-miR-365a-3p  |
| MAZ  | hsa-miR-3128     |
| MAZ  | hsa-miR-26a-5p   |
| MAZ  | hsa-miR-21-5p    |
| MAZ  | hsa-miR-200a-3p  |
| MAZ  | hsa-miR-199a-5p  |
| MAZ  | hsa-miR-199a-3p  |
| MAZ  | hsa-miR-195-5p   |
| MAZ  | hsa-miR-146b-5p  |
| MAZ  | hsa-miR-146a-5p  |
| MAZ  | hsa-miR-144-3p   |
| MAZ  | hsa-miR-142-3p   |
| MAZ  | hsa-miR-139-5p   |
| MAZ  | hsa-miR-138-5p   |
| MAZ  | hsa-miR-1285-3p  |
| MAZ  | hsa-miR-124-3p   |
| MAZ  | hsa-miR-1207-5p  |
| MAZ  | hsa-miR-100-5p   |
| MAZ  | hsa-let-7b-5p    |
| MAZ  | hsa-let-7a-5p    |
| MBD3 | IL10             |
| MBD3 | IL2              |
| MBD3 | NFKB1            |
| MBD3 | PTGS2            |
| MBD3 | SMAD3            |
| MBD3 | STAT3            |
| MBD3 | TGFB1            |
| MBD3 | TLR4             |
| MBD3 | TNF              |
| MBD3 | TP53             |
| MBD3 | hsa-miR-937-5p   |

|       |                  |
|-------|------------------|
| MBD3  | hsa-miR-877-3p   |
| MBD3  | hsa-miR-6893-5p  |
| MBD3  | hsa-miR-6883-5p  |
| MBD3  | hsa-miR-6871-3p  |
| MBD3  | hsa-miR-6797-5p  |
| MBD3  | hsa-miR-6731-5p  |
| MBD3  | hsa-miR-6722-3p  |
| MBD3  | hsa-miR-5089-3p  |
| MBD3  | hsa-miR-4799-5p  |
| MBD3  | hsa-miR-4795-5p  |
| MBD3  | hsa-miR-4694-3p  |
| MBD3  | hsa-miR-4418     |
| MBD3  | hsa-miR-4279     |
| MBD3  | hsa-miR-3658     |
| MBD3  | hsa-miR-337-3p   |
| MBD3  | hsa-miR-3165     |
| MBD3  | hsa-miR-181c-5p  |
| MBD3  | hsa-miR-143-3p   |
| MBD3  | hsa-miR-130b-3p  |
| MBD3  | hsa-miR-1288-5p  |
| MBD3  | hsa-miR-125a-5p  |
| MBD4  | SMAD3            |
| MBD4  | STAT3            |
| MBD4  | TP53             |
| MBD4  | hsa-miR-145-5p   |
| MBD4  | hsa-miR-1908-5p  |
| MBD4  | hsa-miR-320a     |
| MBD4  | hsa-miR-4470     |
| MBD4  | hsa-miR-4738-3p  |
| MBD4  | hsa-miR-663a     |
| MECOM | HIF1A            |
| MECOM | IL6              |
| MECOM | PTGS2            |
| MECOM | SMAD3            |
| MECOM | STAT3            |
| MECOM | TGFB1            |
| MECOM | TP53             |
| MECOM | hsa-miR-92a-3p   |
| MECOM | hsa-miR-92a-1-5p |
| MECOM | hsa-miR-9-5p     |

|       |                  |
|-------|------------------|
| MECOM | hsa-miR-5702     |
| MECOM | hsa-miR-3199     |
| MECOM | hsa-miR-222-3p   |
| MECOM | hsa-miR-20a-5p   |
| MECOM | hsa-miR-19b-3p   |
| MECOM | hsa-miR-19a-3p   |
| MECOM | hsa-miR-18a-5p   |
| MECOM | hsa-miR-18a-3p   |
| MECOM | hsa-miR-17-5p    |
| MEF2A | HIF1A            |
| MEF2A | IL17A            |
| MEF2A | NFKB1            |
| MEF2A | STAT3            |
| MEF2A | TGFB1            |
| MEF2A | TNF              |
| MEF2A | hsa-let-7i-5p    |
| MEF2A | hsa-miR-1207-5p  |
| MEF2A | hsa-miR-128-3p   |
| MEF2A | hsa-miR-142-3p   |
| MEF2A | hsa-miR-155-5p   |
| MEF2A | hsa-miR-17-5p    |
| MEF2A | hsa-miR-18a-3p   |
| MEF2A | hsa-miR-18a-5p   |
| MEF2A | hsa-miR-19a-3p   |
| MEF2A | hsa-miR-20a-5p   |
| MEF2A | hsa-miR-21-5p    |
| MEF2A | hsa-miR-365a-3p  |
| MEF2A | hsa-miR-365a-5p  |
| MEF2A | hsa-miR-4659a-3p |
| MEF2A | hsa-miR-4659b-3p |
| MEF2A | hsa-miR-4736     |
| MEF2A | hsa-miR-663a     |
| MEF2A | hsa-miR-612      |
| MEF2A | hsa-miR-5094     |
| MEF2A | hsa-miR-3662     |
| MEF2C | IL6              |
| MEF2C | NFKB1            |
| MEF2C | hsa-miR-142-3p   |
| MEF2C | hsa-miR-663a     |
| MEF2C | hsa-miR-5094     |

|       |                 |
|-------|-----------------|
| MEF2C | hsa-miR-1178-3p |
| MITF  | HIF1A           |
| MITF  | NFKB1           |
| MITF  | PTGS2           |
| MITF  | STAT3           |
| MITF  | TP53            |
| MITF  | hsa-let-7a-5p   |
| MITF  | hsa-let-7b-5p   |
| MITF  | hsa-miR-101-3p  |
| MITF  | hsa-miR-1249-5p |
| MITF  | hsa-miR-142-3p  |
| MITF  | hsa-miR-146a-5p |
| MITF  | hsa-miR-185-5p  |
| MITF  | hsa-miR-193b-3p |
| MITF  | hsa-miR-24-3p   |
| MITF  | hsa-miR-30d-5p  |
| MITF  | hsa-miR-34a-5p  |
| MITF  | hsa-miR-874-3p  |
| MITF  | hsa-miR-922     |
| MITF  | hsa-miR-92b-3p  |
| MITF  | hsa-miR-6875-3p |
| MITF  | hsa-miR-4441    |
| MITF  | hsa-miR-4434    |
| MITF  | hsa-miR-3934-5p |
| MITF  | hsa-miR-3074-3p |
| MITF  | hsa-miR-296-3p  |
| MITF  | hsa-miR-26a-5p  |
| MITF  | hsa-miR-128-3p  |
| MNT   | HIF1A           |
| MNT   | PTGS2           |
| MNT   | SMAD3           |
| MNT   | STAT3           |
| MNT   | TGFB1           |
| MNT   | TP53            |
| MNT   | hsa-miR-7-5p    |
| MNT   | hsa-miR-6872-3p |
| MNT   | hsa-miR-6835-5p |
| MNT   | hsa-miR-6797-5p |
| MNT   | hsa-miR-5703    |
| MNT   | hsa-miR-22-3p   |

|      |                 |
|------|-----------------|
| MNT  | hsa-miR-19a-3p  |
| MNT  | hsa-miR-18a-5p  |
| MNT  | hsa-miR-18a-3p  |
| MNT  | hsa-miR-17-5p   |
| MNT  | hsa-miR-130b-3p |
| MTA3 | HIF1A           |
| MTA3 | IL10            |
| MTA3 | IL17A           |
| MTA3 | NFKB1           |
| MTA3 | STAT3           |
| MTA3 | TNF             |
| MTA3 | TP53            |
| MTA3 | hsa-miR-93-5p   |
| MTA3 | hsa-miR-6871-3p |
| MTA3 | hsa-miR-6833-3p |
| MTA3 | hsa-miR-6807-5p |
| MTA3 | hsa-miR-6807-3p |
| MTA3 | hsa-miR-6797-5p |
| MTA3 | hsa-miR-6752-5p |
| MTA3 | hsa-miR-625-3p  |
| MTA3 | hsa-miR-612     |
| MTA3 | hsa-miR-3662    |
| MTA3 | hsa-miR-324-5p  |
| MTA3 | hsa-miR-324-3p  |
| MTA3 | hsa-miR-29b-3p  |
| MTA3 | hsa-miR-25-3p   |
| MTA3 | hsa-miR-21-5p   |
| MTA3 | hsa-miR-195-5p  |
| MTA3 | hsa-miR-128-3p  |
| MTA3 | hsa-miR-106b-5p |
| MTA3 | hsa-miR-106b-3p |
| MXD1 | SMAD3           |
| MXD1 | STAT3           |
| MXD1 | TP53            |
| MXD1 | hsa-miR-5692a   |
| MXD1 | hsa-miR-4804-3p |
| MXD1 | hsa-miR-3128    |
| MXD1 | hsa-miR-194-3p  |
| MXD1 | hsa-miR-16-5p   |
| MXD1 | hsa-miR-15b-5p  |

|      |                  |
|------|------------------|
| MXI1 | HIF1A            |
| MXI1 | IL17A            |
| MXI1 | IL6              |
| MXI1 | NFKB1            |
| MXI1 | PTGS2            |
| MXI1 | SMAD3            |
| MXI1 | STAT3            |
| MXI1 | TGFB1            |
| MXI1 | TLR4             |
| MXI1 | TNF              |
| MXI1 | TP53             |
| MXI1 | hsa-miR-1181     |
| MXI1 | hsa-miR-124-3p   |
| MXI1 | hsa-miR-130a-3p  |
| MXI1 | hsa-miR-132-3p   |
| MXI1 | hsa-miR-1908-5p  |
| MXI1 | hsa-miR-22-3p    |
| MXI1 | hsa-miR-223-3p   |
| MXI1 | hsa-miR-320a     |
| MXI1 | hsa-miR-4470     |
| MXI1 | hsa-miR-449c-5p  |
| MXI1 | hsa-miR-4651     |
| MXI1 | hsa-miR-4738-3p  |
| MXI1 | hsa-miR-92b-3p   |
| MXI1 | hsa-miR-935      |
| MXI1 | hsa-miR-93-5p    |
| MXI1 | hsa-miR-92a-3p   |
| MXI1 | hsa-miR-92a-1-5p |
| MXI1 | hsa-miR-8085     |
| MXI1 | hsa-miR-7-5p     |
| MXI1 | hsa-miR-6815-3p  |
| MXI1 | hsa-miR-6809-3p  |
| MXI1 | hsa-miR-6785-5p  |
| MXI1 | hsa-miR-5197-5p  |
| MXI1 | hsa-miR-504-5p   |
| MXI1 | hsa-miR-4795-5p  |
| MXI1 | hsa-miR-4697-3p  |
| MXI1 | hsa-miR-4659a-3p |
| MXI1 | hsa-miR-4441     |
| MXI1 | hsa-miR-4279     |



|       |                 |
|-------|-----------------|
| MXI1  | hsa-miR-375     |
| MXI1  | hsa-miR-30c-5p  |
| MXI1  | hsa-miR-30b-5p  |
| MXI1  | hsa-miR-25-3p   |
| MXI1  | hsa-miR-222-3p  |
| MXI1  | hsa-miR-210-3p  |
| MXI1  | hsa-miR-20a-5p  |
| MXI1  | hsa-miR-203a-3p |
| MXI1  | hsa-miR-19b-3p  |
| MXI1  | hsa-miR-19a-3p  |
| MXI1  | hsa-miR-199b-5p |
| MXI1  | hsa-miR-199a-5p |
| MXI1  | hsa-miR-199a-3p |
| MXI1  | hsa-miR-145-5p  |
| MXI1  | hsa-miR-142-3p  |
| MXI1  | hsa-miR-138-5p  |
| MXI1  | hsa-miR-1322    |
| MXI1  | hsa-miR-130b-3p |
| MXI1  | hsa-miR-128-3p  |
| MXI1  | hsa-miR-1273f   |
| MXI1  | hsa-let-7a-5p   |
| MYB   | HIF1A           |
| MYB   | STAT3           |
| MYB   | hsa-miR-194-3p  |
| MYB   | hsa-let-7b-5p   |
| MYBL1 | STAT3           |
| MYBL2 | HIF1A           |
| MYBL2 | IL6             |
| MYBL2 | NFKB1           |
| MYBL2 | SMAD3           |
| MYBL2 | STAT3           |
| MYBL2 | TGFB1           |
| MYBL2 | TP53            |
| MYBL2 | hsa-miR-935     |
| MYBL2 | hsa-miR-7-5p    |
| MYBL2 | hsa-miR-6785-5p |
| MYBL2 | hsa-miR-618     |
| MYBL2 | hsa-miR-5197-5p |
| MYBL2 | hsa-miR-1273f   |
| MYBL2 | hsa-miR-101-3p  |

|     |                 |
|-----|-----------------|
| MYC | HIF1A           |
| MYC | IL6             |
| MYC | NFKB1           |
| MYC | PTGS2           |
| MYC | STAT3           |
| MYC | TGFB1           |
| MYC | TP53            |
| MYC | SMAD3           |
| MYC | TLR4            |
| MYC | TNF             |
| MYC | hsa-let-7i-5p   |
| MYC | hsa-miR-1181    |
| MYC | hsa-miR-1207-5p |
| MYC | hsa-miR-1234-3p |
| MYC | hsa-miR-124-3p  |
| MYC | hsa-miR-1249-5p |
| MYC | hsa-miR-146b-5p |
| MYC | hsa-miR-149-3p  |
| MYC | hsa-miR-149-5p  |
| MYC | hsa-miR-155-5p  |
| MYC | hsa-miR-17-5p   |
| MYC | hsa-miR-185-5p  |
| MYC | hsa-miR-18a-3p  |
| MYC | hsa-miR-18a-5p  |
| MYC | hsa-miR-1908-5p |
| MYC | hsa-miR-193b-3p |
| MYC | hsa-miR-19a-3p  |
| MYC | hsa-miR-20a-5p  |
| MYC | hsa-miR-22-3p   |
| MYC | hsa-miR-299-5p  |
| MYC | hsa-miR-320a    |
| MYC | hsa-miR-329-5p  |
| MYC | hsa-miR-379-3p  |
| MYC | hsa-miR-380-5p  |
| MYC | hsa-miR-424-5p  |
| MYC | hsa-miR-4441    |
| MYC | hsa-miR-4470    |
| MYC | hsa-miR-4651    |
| MYC | hsa-miR-4685-5p |
| MYC | hsa-miR-4728-5p |

|     |                  |
|-----|------------------|
| MYC | hsa-miR-4736     |
| MYC | hsa-miR-4738-3p  |
| MYC | hsa-miR-484      |
| MYC | hsa-miR-509-5p   |
| MYC | hsa-miR-663a     |
| MYC | hsa-miR-7-5p     |
| MYC | hsa-miR-744-5p   |
| MYC | hsa-miR-9-5p     |
| MYC | hsa-miR-942-5p   |
| MYC | hsa-miR-935      |
| MYC | hsa-miR-93-5p    |
| MYC | hsa-miR-92b-3p   |
| MYC | hsa-miR-92a-3p   |
| MYC | hsa-miR-92a-1-5p |
| MYC | hsa-miR-922      |
| MYC | hsa-miR-877-3p   |
| MYC | hsa-miR-8085     |
| MYC | hsa-miR-7150     |
| MYC | hsa-miR-6875-3p  |
| MYC | hsa-miR-6872-3p  |
| MYC | hsa-miR-6871-3p  |
| MYC | hsa-miR-6835-5p  |
| MYC | hsa-miR-6825-5p  |
| MYC | hsa-miR-6815-3p  |
| MYC | hsa-miR-6809-3p  |
| MYC | hsa-miR-6797-5p  |
| MYC | hsa-miR-6789-3p  |
| MYC | hsa-miR-6762-3p  |
| MYC | hsa-miR-6760-5p  |
| MYC | hsa-miR-625-3p   |
| MYC | hsa-miR-612      |
| MYC | hsa-miR-589-5p   |
| MYC | hsa-miR-589-3p   |
| MYC | hsa-miR-5703     |
| MYC | hsa-miR-5702     |
| MYC | hsa-miR-5197-5p  |
| MYC | hsa-miR-5193     |
| MYC | hsa-miR-5094     |
| MYC | hsa-miR-4799-5p  |
| MYC | hsa-miR-4795-5p  |

|     |                  |
|-----|------------------|
| MYC | hsa-miR-4748     |
| MYC | hsa-miR-4735-3p  |
| MYC | hsa-miR-4659b-3p |
| MYC | hsa-miR-4659a-3p |
| MYC | hsa-miR-4531     |
| MYC | hsa-miR-449c-5p  |
| MYC | hsa-miR-4487     |
| MYC | hsa-miR-4438     |
| MYC | hsa-miR-4434     |
| MYC | hsa-miR-4418     |
| MYC | hsa-miR-4286     |
| MYC | hsa-miR-4282     |
| MYC | hsa-miR-4279     |
| MYC | hsa-miR-3934-5p  |
| MYC | hsa-miR-375      |
| MYC | hsa-miR-371b-3p  |
| MYC | hsa-miR-365a-5p  |
| MYC | hsa-miR-365a-3p  |
| MYC | hsa-miR-3609     |
| MYC | hsa-miR-34a-5p   |
| MYC | hsa-miR-3199     |
| MYC | hsa-miR-3165     |
| MYC | hsa-miR-3128     |
| MYC | hsa-miR-30e-5p   |
| MYC | hsa-miR-30a-5p   |
| MYC | hsa-miR-3065-5p  |
| MYC | hsa-miR-27a-3p   |
| MYC | hsa-miR-26a-5p   |
| MYC | hsa-miR-25-3p    |
| MYC | hsa-miR-24-3p    |
| MYC | hsa-miR-223-3p   |
| MYC | hsa-miR-214-3p   |
| MYC | hsa-miR-2110     |
| MYC | hsa-miR-211-5p   |
| MYC | hsa-miR-210-3p   |
| MYC | hsa-miR-21-5p    |
| MYC | hsa-miR-203a-3p  |
| MYC | hsa-miR-19b-3p   |
| MYC | hsa-miR-199b-5p  |
| MYC | hsa-miR-199a-5p  |

|       |                  |
|-------|------------------|
| MYC   | hsa-miR-199a-3p  |
| MYC   | hsa-miR-181c-5p  |
| MYC   | hsa-miR-150-5p   |
| MYC   | hsa-miR-145-5p   |
| MYC   | hsa-miR-144-3p   |
| MYC   | hsa-miR-143-3p   |
| MYC   | hsa-miR-142-3p   |
| MYC   | hsa-miR-139-5p   |
| MYC   | hsa-miR-138-5p   |
| MYC   | hsa-miR-138-2-3p |
| MYC   | hsa-miR-1322     |
| MYC   | hsa-miR-132-3p   |
| MYC   | hsa-miR-130b-3p  |
| MYC   | hsa-miR-130a-3p  |
| MYC   | hsa-miR-1288-5p  |
| MYC   | hsa-miR-128-3p   |
| MYC   | hsa-miR-1273f    |
| MYC   | hsa-miR-125b-5p  |
| MYC   | hsa-miR-106b-5p  |
| MYC   | hsa-miR-106b-3p  |
| MYC   | hsa-let-7a-5p    |
| MYOD1 | HIF1A            |
| MYOD1 | IL10             |
| MYOD1 | IL6              |
| MYOD1 | NFKB1            |
| MYOD1 | SMAD3            |
| MYOD1 | STAT3            |
| MYOD1 | TP53             |
| MYOD1 | hsa-miR-942-5p   |
| MYOD1 | hsa-miR-93-5p    |
| MYOD1 | hsa-miR-8085     |
| MYOD1 | hsa-miR-8055     |
| MYOD1 | hsa-miR-6871-3p  |
| MYOD1 | hsa-miR-6809-3p  |
| MYOD1 | hsa-miR-6731-5p  |
| MYOD1 | hsa-miR-605-5p   |
| MYOD1 | hsa-miR-589-5p   |
| MYOD1 | hsa-miR-589-3p   |
| MYOD1 | hsa-miR-5681b    |
| MYOD1 | hsa-miR-5681a    |

|       |                 |
|-------|-----------------|
| MYOD1 | hsa-miR-5193    |
| MYOD1 | hsa-miR-4763-3p |
| MYOD1 | hsa-miR-4748    |
| MYOD1 | hsa-miR-4531    |
| MYOD1 | hsa-miR-4282    |
| MYOD1 | hsa-miR-4270    |
| MYOD1 | hsa-miR-33a-5p  |
| MYOD1 | hsa-miR-324-5p  |
| MYOD1 | hsa-miR-324-3p  |
| MYOD1 | hsa-miR-3199    |
| MYOD1 | hsa-miR-3165    |
| MYOD1 | hsa-miR-3160-3p |
| MYOD1 | hsa-miR-30c-5p  |
| MYOD1 | hsa-miR-30b-5p  |
| MYOD1 | hsa-miR-3074-3p |
| MYOD1 | hsa-miR-3065-5p |
| MYOD1 | hsa-miR-296-3p  |
| MYOD1 | hsa-miR-27a-3p  |
| MYOD1 | hsa-miR-26a-5p  |
| MYOD1 | hsa-miR-25-3p   |
| MYOD1 | hsa-miR-24-3p   |
| MYOD1 | hsa-miR-199a-5p |
| MYOD1 | hsa-miR-199a-3p |
| MYOD1 | hsa-miR-194-3p  |
| MYOD1 | hsa-miR-185-5p  |
| MYOD1 | hsa-miR-149-5p  |
| MYOD1 | hsa-miR-149-3p  |
| MYOD1 | hsa-miR-138-5p  |
| MYOD1 | hsa-miR-130a-3p |
| MYOD1 | hsa-miR-1288-5p |
| MYOD1 | hsa-miR-1249-5p |
| MYOD1 | hsa-miR-1207-5p |
| MYOD1 | hsa-miR-106b-5p |
| MYOD1 | hsa-miR-106b-3p |
| MYOD1 | hsa-let-7b-5p   |
| MZF1  | HIF1A           |
| MZF1  | SMAD3           |
| MZF1  | STAT3           |
| MZF1  | hsa-miR-19a-3p  |
| MZF1  | hsa-miR-18a-5p  |

|       |                 |
|-------|-----------------|
| MZF1  | hsa-miR-18a-3p  |
| MZF1  | hsa-miR-17-5p   |
| MZF1  | hsa-miR-145-5p  |
| NANOG | HIF1A           |
| NANOG | NFKB1           |
| NANOG | PTGS2           |
| NANOG | SMAD3           |
| NANOG | STAT3           |
| NANOG | TP53            |
| NANOG | IL6             |
| NANOG | hsa-miR-663a    |
| NANOG | hsa-miR-9-5p    |
| NANOG | hsa-miR-7158-5p |
| NANOG | hsa-miR-7151-3p |
| NANOG | hsa-miR-7-5p    |
| NANOG | hsa-miR-6833-3p |
| NANOG | hsa-miR-6815-3p |
| NANOG | hsa-miR-6751-5p |
| NANOG | hsa-miR-618     |
| NANOG | hsa-miR-5703    |
| NANOG | hsa-miR-5702    |
| NANOG | hsa-miR-548n    |
| NANOG | hsa-miR-519d-3p |
| NANOG | hsa-miR-4795-5p |
| NANOG | hsa-miR-449c-5p |
| NANOG | hsa-miR-4487    |
| NANOG | hsa-miR-424-5p  |
| NANOG | hsa-miR-34b-5p  |
| NANOG | hsa-miR-33a-5p  |
| NANOG | hsa-miR-329-5p  |
| NANOG | hsa-miR-2682-5p |
| NANOG | hsa-miR-22-3p   |
| NANOG | hsa-miR-21-5p   |
| NANOG | hsa-miR-203a-3p |
| NANOG | hsa-miR-199b-5p |
| NANOG | hsa-miR-193b-3p |
| NANOG | hsa-miR-146a-5p |
| NANOG | hsa-miR-1468-3p |
| NANOG | hsa-miR-145-5p  |
| NANOG | hsa-miR-137     |

|       |                 |
|-------|-----------------|
| NANOG | hsa-miR-128-3p  |
| NANOG | hsa-miR-124-3p  |
| NANOG | hsa-miR-10b-5p  |
| NCOR1 | HIF1A           |
| NCOR1 | IL6             |
| NCOR1 | NFKB1           |
| NCOR1 | PTGS2           |
| NCOR1 | STAT3           |
| NCOR1 | TGFB1           |
| NCOR1 | TLR4            |
| NCOR1 | TP53            |
| NCOR1 | hsa-let-7a-5p   |
| NCOR1 | hsa-let-7e-5p   |
| NCOR1 | hsa-miR-101-3p  |
| NCOR1 | hsa-miR-1181    |
| NCOR1 | hsa-miR-1207-5p |
| NCOR1 | hsa-miR-1296-3p |
| NCOR1 | hsa-miR-130b-3p |
| NCOR1 | hsa-miR-142-3p  |
| NCOR1 | hsa-miR-144-3p  |
| NCOR1 | hsa-miR-181c-5p |
| NCOR1 | hsa-miR-185-5p  |
| NCOR1 | hsa-miR-18a-3p  |
| NCOR1 | hsa-miR-18a-5p  |
| NCOR1 | hsa-miR-199b-5p |
| NCOR1 | hsa-miR-19a-3p  |
| NCOR1 | hsa-miR-20a-5p  |
| NCOR1 | hsa-miR-21-5p   |
| NCOR1 | hsa-miR-223-3p  |
| NCOR1 | hsa-miR-622     |
| NCOR1 | hsa-miR-663a    |
| NCOR1 | hsa-miR-7-5p    |
| NCOR1 | hsa-miR-9-5p    |
| NCOR1 | hsa-miR-7150    |
| NCOR1 | hsa-miR-6882-5p |
| NCOR1 | hsa-miR-6872-3p |
| NCOR1 | hsa-miR-6825-5p |
| NCOR1 | hsa-miR-6806-5p |
| NCOR1 | hsa-miR-6803-5p |
| NCOR1 | hsa-miR-5703    |



|        |                 |
|--------|-----------------|
| NCOR1  | hsa-miR-4795-5p |
| NCOR1  | hsa-miR-4763-3p |
| NCOR1  | hsa-miR-4738-3p |
| NCOR1  | hsa-miR-4470    |
| NCOR1  | hsa-miR-3658    |
| NCOR1  | hsa-miR-296-3p  |
| NCOR1  | hsa-miR-2682-5p |
| NCOR1  | hsa-miR-193b-3p |
| NCOR1  | hsa-miR-1908-5p |
| NCOR1  | hsa-miR-150-5p  |
| NCOR1  | hsa-miR-137     |
| NCOR1  | hsa-miR-132-3p  |
| NCOR1  | hsa-miR-1273f   |
| NCOR1  | hsa-let-7b-5p   |
| NCOR2  | IL10            |
| NCOR2  | TLR4            |
| NFAT5  | HIF1A           |
| NFAT5  | NFKB1           |
| NFAT5  | PTGS2           |
| NFAT5  | SMAD3           |
| NFAT5  | STAT3           |
| NFAT5  | TGFB1           |
| NFAT5  | TP53            |
| NFAT5  | hsa-miR-942-5p  |
| NFAT5  | hsa-miR-93-5p   |
| NFAT5  | hsa-miR-9-5p    |
| NFAT5  | hsa-miR-7-5p    |
| NFAT5  | hsa-miR-6807-5p |
| NFAT5  | hsa-miR-6807-3p |
| NFAT5  | hsa-miR-4795-5p |
| NFAT5  | hsa-miR-4763-3p |
| NFAT5  | hsa-miR-25-3p   |
| NFAT5  | hsa-miR-22-3p   |
| NFAT5  | hsa-miR-194-3p  |
| NFAT5  | hsa-miR-106b-5p |
| NFAT5  | hsa-miR-106b-3p |
| NFAT5  | hsa-let-7b-5p   |
| NFATC1 | HIF1A           |
| NFATC1 | NFKB1           |
| NFATC1 | STAT3           |

|        |                 |
|--------|-----------------|
| NFATC1 | TGFB1           |
| NFATC1 | TNF             |
| NFATC1 | TP53            |
| NFATC1 | hsa-let-7i-5p   |
| NFATC1 | hsa-miR-1908-5p |
| NFATC1 | hsa-miR-3662    |
| NFATC1 | hsa-miR-4434    |
| NFATC1 | hsa-miR-4651    |
| NFATC1 | hsa-miR-663a    |
| NFATC1 | hsa-miR-6872-3p |
| NFATC1 | hsa-miR-6731-5p |
| NFATC1 | hsa-miR-630     |
| NFATC1 | hsa-miR-6127    |
| NFATC1 | hsa-miR-5196-3p |
| NFATC1 | hsa-miR-3199    |
| NFATC1 | hsa-miR-30c-5p  |
| NFATC1 | hsa-miR-29b-3p  |
| NFATC1 | hsa-miR-195-5p  |
| NFATC1 | hsa-miR-146a-5p |
| NFATC1 | hsa-miR-107     |
| NFE2   | HIF1A           |
| NFE2   | IL17A           |
| NFE2   | NFKB1           |
| NFE2   | PTGS2           |
| NFE2   | SMAD3           |
| NFE2   | STAT3           |
| NFE2   | TGFB1           |
| NFE2   | TLR4            |
| NFE2   | TP53            |
| NFE2   | hsa-miR-1207-5p |
| NFE2   | hsa-miR-1322    |
| NFE2   | hsa-miR-484     |
| NFE2   | hsa-miR-663a    |
| NFE2   | hsa-miR-935     |
| NFE2   | hsa-miR-889-3p  |
| NFE2   | hsa-miR-6825-5p |
| NFE2   | hsa-miR-6815-3p |
| NFE2   | hsa-miR-6809-3p |
| NFE2   | hsa-miR-6785-5p |
| NFE2   | hsa-miR-6762-3p |

|        |                  |
|--------|------------------|
| NFE2   | hsa-miR-6760-5p  |
| NFE2   | hsa-miR-6752-5p  |
| NFE2   | hsa-miR-6749-3p  |
| NFE2   | hsa-miR-589-5p   |
| NFE2   | hsa-miR-589-3p   |
| NFE2   | hsa-miR-5703     |
| NFE2   | hsa-miR-4659b-3p |
| NFE2   | hsa-miR-4531     |
| NFE2   | hsa-miR-4487     |
| NFE2   | hsa-miR-4271     |
| NFE2   | hsa-miR-33a-5p   |
| NFE2   | hsa-miR-26a-5p   |
| NFE2   | hsa-miR-214-3p   |
| NFE2   | hsa-miR-199b-5p  |
| NFE2   | hsa-miR-144-3p   |
| NFE2   | hsa-miR-143-3p   |
| NFE2   | hsa-miR-138-5p   |
| NFE2   | hsa-miR-124-3p   |
| NFE2   | hsa-miR-101-3p   |
| NFE2L2 | PTGS2            |
| NFE2L2 | SMAD3            |
| NFE2L2 | STAT3            |
| NFE2L2 | TP53             |
| NFE2L2 | hsa-miR-181c-5p  |
| NFE2L2 | hsa-miR-365a-3p  |
| NFE2L2 | hsa-miR-365a-5p  |
| NFE2L2 | hsa-miR-622      |
| NFE2L2 | hsa-miR-93-5p    |
| NFE2L2 | hsa-miR-6797-5p  |
| NFE2L2 | hsa-miR-4763-3p  |
| NFE2L2 | hsa-miR-3199     |
| NFE2L2 | hsa-miR-25-3p    |
| NFE2L2 | hsa-miR-221-3p   |
| NFE2L2 | hsa-miR-194-3p   |
| NFE2L2 | hsa-miR-130a-3p  |
| NFE2L2 | hsa-miR-106b-5p  |
| NFE2L2 | hsa-miR-106b-3p  |
| NFE2L2 | hsa-let-7b-5p    |
| NFIC   | HIF1A            |
| NFIC   | IL17A            |

|      |                 |
|------|-----------------|
| NFIC | NFKB1           |
| NFIC | PTGS2           |
| NFIC | SMAD3           |
| NFIC | STAT3           |
| NFIC | TGFB1           |
| NFIC | TLR4            |
| NFIC | TNF             |
| NFIC | TP53            |
| NFIC | hsa-let-7e-5p   |
| NFIC | hsa-miR-155-5p  |
| NFIC | hsa-miR-22-3p   |
| NFIC | hsa-miR-24-3p   |
| NFIC | hsa-miR-27a-3p  |
| NFIC | hsa-miR-30a-5p  |
| NFIC | hsa-miR-320a    |
| NFIC | hsa-miR-365a-3p |
| NFIC | hsa-miR-365a-5p |
| NFIC | hsa-miR-4279    |
| NFIC | hsa-miR-4470    |
| NFIC | hsa-miR-663a    |
| NFIC | hsa-miR-9-5p    |
| NFIC | hsa-miR-7-5p    |
| NFIC | hsa-miR-6875-3p |
| NFIC | hsa-miR-6871-3p |
| NFIC | hsa-miR-625-3p  |
| NFIC | hsa-miR-618     |
| NFIC | hsa-miR-6133    |
| NFIC | hsa-miR-5703    |
| NFIC | hsa-miR-5702    |
| NFIC | hsa-miR-5197-5p |
| NFIC | hsa-miR-5193    |
| NFIC | hsa-miR-5094    |
| NFIC | hsa-miR-5089-3p |
| NFIC | hsa-miR-4487    |
| NFIC | hsa-miR-4434    |
| NFIC | hsa-miR-4282    |
| NFIC | hsa-miR-3934-5p |
| NFIC | hsa-miR-375     |
| NFIC | hsa-miR-3662    |
| NFIC | hsa-miR-3165    |

|      |                 |
|------|-----------------|
| NFIC | hsa-miR-30e-5p  |
| NFIC | hsa-miR-2110    |
| NFIC | hsa-miR-210-3p  |
| NFIC | hsa-miR-21-5p   |
| NFIC | hsa-miR-203a-3p |
| NFIC | hsa-miR-199a-5p |
| NFIC | hsa-miR-199a-3p |
| NFIC | hsa-miR-195-5p  |
| NFIC | hsa-miR-193b-3p |
| NFIC | hsa-miR-149-5p  |
| NFIC | hsa-miR-149-3p  |
| NFIC | hsa-miR-146b-5p |
| NFIC | hsa-miR-145-5p  |
| NFIC | hsa-miR-142-3p  |
| NFIC | hsa-miR-1288-5p |
| NFIC | hsa-miR-128-3p  |
| NFIC | hsa-miR-124-3p  |
| NFIC | hsa-miR-1207-5p |
| NFIC | hsa-let-7i-5p   |
| NFIC | hsa-let-7a-5p   |
| NFYA | HIF1A           |
| NFYA | PTGS2           |
| NFYA | STAT3           |
| NFYA | hsa-miR-1181    |
| NFYA | hsa-miR-2110    |
| NFYA | hsa-miR-612     |
| NFYA | hsa-miR-18a-5p  |
| NFYA | hsa-miR-18a-3p  |
| NFYA | hsa-miR-17-5p   |
| NFYB | HIF1A           |
| NFYB | PTGS2           |
| NFYB | SMAD3           |
| NFYB | STAT3           |
| NFYB | TLR4            |
| NFYB | TNF             |
| NFYB | TP53            |
| NFYB | hsa-miR-940     |
| NFYB | hsa-miR-6835-5p |
| NFYB | hsa-miR-6785-5p |
| NFYB | hsa-miR-5193    |

|        |                 |
|--------|-----------------|
| NFYB   | hsa-miR-4736    |
| NFYB   | hsa-miR-3662    |
| NFYB   | hsa-miR-27a-3p  |
| NFYB   | hsa-miR-24-3p   |
| NFYB   | hsa-miR-21-5p   |
| NFYB   | hsa-miR-150-5p  |
| NFYB   | hsa-let-7i-5p   |
| NKX2-1 | HIF1A           |
| NKX2-1 | PTGS2           |
| NKX2-1 | STAT3           |
| NKX2-1 | TP53            |
| NKX2-1 | NFKB1           |
| NKX2-1 | SMAD3           |
| NKX2-1 | hsa-miR-92b-3p  |
| NKX2-1 | hsa-miR-7-5p    |
| NKX2-1 | hsa-miR-6875-3p |
| NKX2-1 | hsa-miR-5702    |
| NKX2-1 | hsa-miR-5197-5p |
| NKX2-1 | hsa-miR-5196-3p |
| NKX2-1 | hsa-miR-4804-3p |
| NKX2-1 | hsa-miR-4799-5p |
| NKX2-1 | hsa-miR-452-5p  |
| NKX2-1 | hsa-miR-34a-5p  |
| NKX2-1 | hsa-miR-3165    |
| NKX2-1 | hsa-miR-3065-5p |
| NKX2-1 | hsa-miR-29b-3p  |
| NKX2-1 | hsa-miR-27a-3p  |
| NKX2-1 | hsa-miR-24-3p   |
| NKX2-1 | hsa-miR-222-3p  |
| NKX2-1 | hsa-miR-21-5p   |
| NKX2-1 | hsa-miR-137     |
| NKX2-1 | hsa-miR-1288-5p |
| NKX2-1 | hsa-miR-1249-5p |
| NKX2-1 | hsa-miR-1207-5p |
| NKX2-1 | hsa-miR-1178-3p |
| NKX2-2 | HIF1A           |
| NKX2-2 | PTGS2           |
| NKX2-2 | SMAD3           |
| NKX2-2 | STAT3           |
| NKX2-2 | TP53            |

|        |                 |
|--------|-----------------|
| NKX2-2 | hsa-miR-4470    |
| NKX2-2 | hsa-miR-3199    |
| NKX2-2 | hsa-miR-18a-5p  |
| NKX2-2 | hsa-miR-18a-3p  |
| NKX2-2 | hsa-miR-17-5p   |
| NKX2-2 | hsa-let-7a-5p   |
| NKX2-5 | HIF1A           |
| NKX2-5 | SMAD3           |
| NKX2-5 | TP53            |
| NR1D1  | STAT3           |
| NR1D1  | hsa-miR-4795-5p |
| NR1D1  | hsa-miR-194-3p  |
| NR2C2  | TP53            |
| NR2C2  | hsa-miR-21-5p   |
| NR2C2  | hsa-miR-663a    |
| NR2C2  | hsa-miR-7-5p    |
| NR2F1  | IL10            |
| NR2F1  | hsa-miR-5003-5p |
| NR2F2  | HIF1A           |
| NR2F2  | IL6             |
| NR2F2  | NFKB1           |
| NR2F2  | PTGS2           |
| NR2F2  | SMAD3           |
| NR2F2  | STAT3           |
| NR2F2  | TGFB1           |
| NR2F2  | TP53            |
| NR2F2  | hsa-miR-1181    |
| NR2F2  | hsa-miR-149-3p  |
| NR2F2  | hsa-miR-149-5p  |
| NR2F2  | hsa-miR-324-3p  |
| NR2F2  | hsa-miR-324-5p  |
| NR2F2  | hsa-miR-365a-3p |
| NR2F2  | hsa-miR-365a-5p |
| NR2F2  | hsa-miR-4651    |
| NR2F2  | hsa-miR-4738-3p |
| NR2F2  | hsa-miR-940     |
| NR2F2  | hsa-miR-937-5p  |
| NR2F2  | hsa-miR-935     |
| NR2F2  | hsa-miR-93-5p   |
| NR2F2  | hsa-miR-922     |

|       |                  |
|-------|------------------|
| NR2F2 | hsa-miR-9-5p     |
| NR2F2 | hsa-miR-877-3p   |
| NR2F2 | hsa-miR-8085     |
| NR2F2 | hsa-miR-8071     |
| NR2F2 | hsa-miR-7150     |
| NR2F2 | hsa-miR-7113-5p  |
| NR2F2 | hsa-miR-7110-5p  |
| NR2F2 | hsa-miR-7110-3p  |
| NR2F2 | hsa-miR-7-5p     |
| NR2F2 | hsa-miR-6882-5p  |
| NR2F2 | hsa-miR-6875-3p  |
| NR2F2 | hsa-miR-6872-3p  |
| NR2F2 | hsa-miR-6871-3p  |
| NR2F2 | hsa-miR-6835-5p  |
| NR2F2 | hsa-miR-6833-3p  |
| NR2F2 | hsa-miR-6825-5p  |
| NR2F2 | hsa-miR-6815-3p  |
| NR2F2 | hsa-miR-6809-3p  |
| NR2F2 | hsa-miR-6806-5p  |
| NR2F2 | hsa-miR-6803-5p  |
| NR2F2 | hsa-miR-6797-5p  |
| NR2F2 | hsa-miR-6766-5p  |
| NR2F2 | hsa-miR-6762-3p  |
| NR2F2 | hsa-miR-6760-5p  |
| NR2F2 | hsa-miR-6756-5p  |
| NR2F2 | hsa-miR-6754-5p  |
| NR2F2 | hsa-miR-6752-5p  |
| NR2F2 | hsa-miR-6751-5p  |
| NR2F2 | hsa-miR-6511a-5p |
| NR2F2 | hsa-miR-625-3p   |
| NR2F2 | hsa-miR-622      |
| NR2F2 | hsa-miR-608      |
| NR2F2 | hsa-miR-589-5p   |
| NR2F2 | hsa-miR-589-3p   |
| NR2F2 | hsa-miR-5197-5p  |
| NR2F2 | hsa-miR-5196-3p  |
| NR2F2 | hsa-miR-5193     |
| NR2F2 | hsa-miR-5089-3p  |
| NR2F2 | hsa-miR-494-3p   |
| NR2F2 | hsa-miR-484      |



|       |                 |
|-------|-----------------|
| NR2F2 | hsa-miR-4795-5p |
| NR2F2 | hsa-miR-4736    |
| NR2F2 | hsa-miR-4728-5p |
| NR2F2 | hsa-miR-454-3p  |
| NR2F2 | hsa-miR-4531    |
| NR2F2 | hsa-miR-4516    |
| NR2F2 | hsa-miR-449c-5p |
| NR2F2 | hsa-miR-4499    |
| NR2F2 | hsa-miR-4487    |
| NR2F2 | hsa-miR-4470    |
| NR2F2 | hsa-miR-4441    |
| NR2F2 | hsa-miR-4434    |
| NR2F2 | hsa-miR-424-5p  |
| NR2F2 | hsa-miR-3934-5p |
| NR2F2 | hsa-miR-380-5p  |
| NR2F2 | hsa-miR-33a-5p  |
| NR2F2 | hsa-miR-337-3p  |
| NR2F2 | hsa-miR-320a    |
| NR2F2 | hsa-miR-3074-3p |
| NR2F2 | hsa-miR-3065-5p |
| NR2F2 | hsa-miR-296-3p  |
| NR2F2 | hsa-miR-27a-3p  |
| NR2F2 | hsa-miR-26b-5p  |
| NR2F2 | hsa-miR-26a-5p  |
| NR2F2 | hsa-miR-25-3p   |
| NR2F2 | hsa-miR-24-3p   |
| NR2F2 | hsa-miR-223-3p  |
| NR2F2 | hsa-miR-22-3p   |
| NR2F2 | hsa-miR-2110    |
| NR2F2 | hsa-miR-211-5p  |
| NR2F2 | hsa-miR-210-3p  |
| NR2F2 | hsa-miR-21-5p   |
| NR2F2 | hsa-miR-203a-3p |
| NR2F2 | hsa-miR-199b-5p |
| NR2F2 | hsa-miR-199a-5p |
| NR2F2 | hsa-miR-199a-3p |
| NR2F2 | hsa-miR-195-5p  |
| NR2F2 | hsa-miR-194-3p  |
| NR2F2 | hsa-miR-193b-3p |
| NR2F2 | hsa-miR-1909-3p |

|       |                 |
|-------|-----------------|
| NR2F2 | hsa-miR-185-5p  |
| NR2F2 | hsa-miR-181c-5p |
| NR2F2 | hsa-miR-17-5p   |
| NR2F2 | hsa-miR-150-5p  |
| NR2F2 | hsa-miR-146b-5p |
| NR2F2 | hsa-miR-145-5p  |
| NR2F2 | hsa-miR-144-3p  |
| NR2F2 | hsa-miR-142-3p  |
| NR2F2 | hsa-miR-132-3p  |
| NR2F2 | hsa-miR-130b-3p |
| NR2F2 | hsa-miR-125a-5p |
| NR2F2 | hsa-miR-1249-5p |
| NR2F2 | hsa-miR-124-3p  |
| NR2F2 | hsa-miR-1234-3p |
| NR2F2 | hsa-miR-1207-5p |
| NR2F2 | hsa-miR-1178-3p |
| NR2F2 | hsa-miR-106b-5p |
| NR2F2 | hsa-miR-106b-3p |
| NR2F2 | hsa-miR-1-3p    |
| NR2F2 | hsa-let-7i-5p   |
| NR2F2 | hsa-let-7e-5p   |
| NR2F2 | hsa-let-7a-5p   |
| NR3C1 | STAT3           |
| NR3C1 | HIF1A           |
| NR3C1 | IL6             |
| NR3C1 | PTGS2           |
| NR3C1 | SMAD3           |
| NR3C1 | TGFB1           |
| NR3C1 | TP53            |
| NR3C1 | hsa-let-7a-5p   |
| NR3C1 | hsa-let-7b-5p   |
| NR3C1 | hsa-let-7i-5p   |
| NR3C1 | hsa-miR-1-3p    |
| NR3C1 | hsa-miR-101-3p  |
| NR3C1 | hsa-miR-1296-3p |
| NR3C1 | hsa-miR-1908-5p |
| NR3C1 | hsa-miR-193b-3p |
| NR3C1 | hsa-miR-194-3p  |
| NR3C1 | hsa-miR-21-5p   |
| NR3C1 | hsa-miR-210-3p  |

|       |                  |
|-------|------------------|
| NR3C1 | hsa-miR-22-3p    |
| NR3C1 | hsa-miR-221-3p   |
| NR3C1 | hsa-miR-222-3p   |
| NR3C1 | hsa-miR-30a-5p   |
| NR3C1 | hsa-miR-4763-3p  |
| NR3C1 | hsa-miR-4799-5p  |
| NR3C1 | hsa-miR-589-3p   |
| NR3C1 | hsa-miR-589-5p   |
| NR3C1 | hsa-miR-622      |
| NR3C1 | hsa-miR-663a     |
| NR3C1 | hsa-miR-92b-3p   |
| NR3C1 | hsa-miR-937-5p   |
| NR3C1 | hsa-miR-92a-3p   |
| NR3C1 | hsa-miR-92a-2-5p |
| NR3C1 | hsa-miR-9-5p     |
| NR3C1 | hsa-miR-744-5p   |
| NR3C1 | hsa-miR-6837-5p  |
| NR3C1 | hsa-miR-6835-5p  |
| NR3C1 | hsa-miR-6789-3p  |
| NR3C1 | hsa-miR-6785-5p  |
| NR3C1 | hsa-miR-5692a    |
| NR3C1 | hsa-miR-5197-5p  |
| NR3C1 | hsa-miR-5193     |
| NR3C1 | hsa-miR-484      |
| NR3C1 | hsa-miR-4804-3p  |
| NR3C1 | hsa-miR-4738-3p  |
| NR3C1 | hsa-miR-4720-3p  |
| NR3C1 | hsa-miR-4651     |
| NR3C1 | hsa-miR-4531     |
| NR3C1 | hsa-miR-4516     |
| NR3C1 | hsa-miR-4487     |
| NR3C1 | hsa-miR-4279     |
| NR3C1 | hsa-miR-3934-5p  |
| NR3C1 | hsa-miR-365a-5p  |
| NR3C1 | hsa-miR-365a-3p  |
| NR3C1 | hsa-miR-324-5p   |
| NR3C1 | hsa-miR-324-3p   |
| NR3C1 | hsa-miR-320a     |
| NR3C1 | hsa-miR-3128     |
| NR3C1 | hsa-miR-2110     |

|       |                 |
|-------|-----------------|
| NR3C1 | hsa-miR-20b-5p  |
| NR3C1 | hsa-miR-203a-3p |
| NR3C1 | hsa-miR-19b-3p  |
| NR3C1 | hsa-miR-18b-5p  |
| NR3C1 | hsa-miR-185-5p  |
| NR3C1 | hsa-miR-181a-5p |
| NR3C1 | hsa-miR-150-5p  |
| NR3C1 | hsa-miR-145-5p  |
| NR3C1 | hsa-miR-143-3p  |
| NR3C1 | hsa-miR-139-5p  |
| NR3C1 | hsa-miR-1273f   |
| NR3C1 | hsa-miR-106a-5p |
| NR3C1 | hsa-miR-106a-3p |
| NR5A1 | HIF1A           |
| NR5A1 | NFKB1           |
| NR5A1 | PTGS2           |
| NR5A1 | TGFB1           |
| NR5A1 | hsa-miR-663a    |
| NR5A1 | hsa-miR-5003-5p |
| NR5A1 | hsa-miR-296-3p  |
| NR5A1 | hsa-miR-195-5p  |
| NR5A1 | hsa-miR-1910-3p |
| NR5A1 | hsa-miR-145-5p  |
| NR5A1 | hsa-miR-125b-5p |
| NR5A2 | IL6             |
| NR5A2 | hsa-miR-9-5p    |
| NRF1  | HIF1A           |
| NRF1  | STAT3           |
| NRF1  | IL2             |
| NRF1  | NFKB1           |
| NRF1  | TGFB1           |
| NRF1  | TLR4            |
| NRF1  | TNF             |
| NRF1  | hsa-miR-130a-3p |
| NRF1  | hsa-miR-1908-5p |
| NRF1  | hsa-miR-320a    |
| NRF1  | hsa-miR-4470    |
| NRF1  | hsa-miR-4651    |
| NRF1  | hsa-miR-4738-3p |
| NRF1  | hsa-miR-92a-3p  |

|      |                  |
|------|------------------|
| NRF1 | hsa-miR-92a-1-5p |
| NRF1 | hsa-miR-6825-5p  |
| NRF1 | hsa-miR-663a     |
| NRF1 | hsa-miR-484      |
| NRF1 | hsa-miR-4795-5p  |
| NRF1 | hsa-miR-4736     |
| NRF1 | hsa-miR-4531     |
| NRF1 | hsa-miR-452-5p   |
| NRF1 | hsa-miR-449c-5p  |
| NRF1 | hsa-miR-4487     |
| NRF1 | hsa-miR-375      |
| NRF1 | hsa-miR-30e-5p   |
| NRF1 | hsa-miR-20a-5p   |
| NRF1 | hsa-miR-203a-3p  |
| NRF1 | hsa-miR-19b-3p   |
| NRF1 | hsa-miR-19a-3p   |
| NRF1 | hsa-miR-199a-5p  |
| NRF1 | hsa-miR-199a-3p  |
| NRF1 | hsa-miR-18a-5p   |
| NRF1 | hsa-miR-18a-3p   |
| NRF1 | hsa-miR-17-5p    |
| NRF1 | hsa-miR-138-5p   |
| NRF1 | hsa-miR-132-3p   |
| NRF1 | hsa-miR-130b-3p  |
| OTX2 | HIF1A            |
| OTX2 | IL6              |
| OTX2 | NFKB1            |
| OTX2 | PTGS2            |
| OTX2 | SMAD3            |
| OTX2 | STAT3            |
| OTX2 | TGFB1            |
| OTX2 | TP53             |
| OTX2 | hsa-miR-9-5p     |
| OTX2 | hsa-miR-7150     |
| OTX2 | hsa-miR-7110-5p  |
| OTX2 | hsa-miR-7110-3p  |
| OTX2 | hsa-miR-7-5p     |
| OTX2 | hsa-miR-6875-3p  |
| OTX2 | hsa-miR-6511a-5p |
| OTX2 | hsa-miR-618      |

|       |                 |
|-------|-----------------|
| OTX2  | hsa-miR-589-5p  |
| OTX2  | hsa-miR-589-3p  |
| OTX2  | hsa-miR-548n    |
| OTX2  | hsa-miR-484     |
| OTX2  | hsa-miR-4720-3p |
| OTX2  | hsa-miR-4694-3p |
| OTX2  | hsa-miR-4650-5p |
| OTX2  | hsa-miR-375     |
| OTX2  | hsa-miR-34b-5p  |
| OTX2  | hsa-miR-3199    |
| OTX2  | hsa-miR-3074-3p |
| OTX2  | hsa-miR-2682-5p |
| OTX2  | hsa-miR-24-3p   |
| OTX2  | hsa-miR-21-5p   |
| OTX2  | hsa-miR-203a-3p |
| OTX2  | hsa-miR-200a-3p |
| OTX2  | hsa-miR-193b-3p |
| OTX2  | hsa-miR-149-5p  |
| OTX2  | hsa-miR-149-3p  |
| OTX2  | hsa-miR-137     |
| OTX2  | hsa-miR-1322    |
| OTX2  | hsa-miR-130b-3p |
| OTX2  | hsa-miR-128-3p  |
| OTX2  | hsa-miR-1273f   |
| OTX2  | hsa-miR-124-3p  |
| OVOL2 | HIF1A           |
| OVOL2 | SMAD3           |
| OVOL2 | hsa-miR-22-3p   |
| PATZ1 | NFKB1           |
| PATZ1 | PTGS2           |
| PATZ1 | SMAD3           |
| PATZ1 | STAT3           |
| PATZ1 | hsa-miR-7-5p    |
| PATZ1 | hsa-miR-5692a   |
| PATZ1 | hsa-miR-4434    |
| PATZ1 | hsa-miR-29b-3p  |
| PATZ1 | hsa-miR-20a-5p  |
| PATZ1 | hsa-miR-19a-3p  |
| PATZ1 | hsa-miR-18a-5p  |
| PATZ1 | hsa-miR-18a-3p  |

|       |                  |
|-------|------------------|
| PATZ1 | hsa-miR-17-5p    |
| PAX5  | HIF1A            |
| PAX5  | NFKB1            |
| PAX5  | STAT3            |
| PAX5  | TGFB1            |
| PAX5  | TNF              |
| PAX5  | TP53             |
| PAX5  | PTGS2            |
| PAX5  | hsa-let-7i-5p    |
| PAX5  | hsa-miR-1181     |
| PAX5  | hsa-miR-142-3p   |
| PAX5  | hsa-miR-17-5p    |
| PAX5  | hsa-miR-18a-3p   |
| PAX5  | hsa-miR-18a-5p   |
| PAX5  | hsa-miR-19a-3p   |
| PAX5  | hsa-miR-20a-5p   |
| PAX5  | hsa-miR-4651     |
| PAX5  | hsa-miR-484      |
| PAX5  | hsa-miR-663a     |
| PAX5  | hsa-miR-92b-3p   |
| PAX5  | hsa-miR-92a-3p   |
| PAX5  | hsa-miR-92a-1-5p |
| PAX5  | hsa-miR-922      |
| PAX5  | hsa-miR-9-5p     |
| PAX5  | hsa-miR-6872-3p  |
| PAX5  | hsa-miR-6789-3p  |
| PAX5  | hsa-miR-6511a-5p |
| PAX5  | hsa-miR-625-3p   |
| PAX5  | hsa-miR-589-5p   |
| PAX5  | hsa-miR-589-3p   |
| PAX5  | hsa-miR-5703     |
| PAX5  | hsa-miR-5193     |
| PAX5  | hsa-miR-5094     |
| PAX5  | hsa-miR-4531     |
| PAX5  | hsa-miR-4516     |
| PAX5  | hsa-miR-449c-5p  |
| PAX5  | hsa-miR-4487     |
| PAX5  | hsa-miR-3662     |
| PAX5  | hsa-miR-365a-5p  |
| PAX5  | hsa-miR-365a-3p  |

|      |                 |
|------|-----------------|
| PAX5 | hsa-miR-320a    |
| PAX5 | hsa-miR-27a-3p  |
| PAX5 | hsa-miR-24-3p   |
| PAX5 | hsa-miR-210-3p  |
| PAX5 | hsa-miR-199b-5p |
| PAX5 | hsa-miR-195-5p  |
| PAX5 | hsa-miR-185-5p  |
| PAX5 | hsa-miR-153-5p  |
| PAX5 | hsa-miR-132-3p  |
| PAX5 | hsa-miR-128-3p  |
| PAX5 | hsa-miR-1234-3p |
| PAX5 | hsa-miR-1207-5p |
| PAX6 | TGFB1           |
| PBX1 | STAT3           |
| PBX1 | TP53            |
| PBX1 | hsa-miR-937-5p  |
| PBX1 | hsa-miR-6882-5p |
| PBX1 | hsa-miR-5197-5p |
| PBX1 | hsa-miR-4419a   |
| PBX1 | hsa-miR-375     |
| PBX2 | STAT3           |
| PBX3 | HIF1A           |
| PBX3 | STAT3           |
| PBX3 | TGFB1           |
| PBX3 | TNF             |
| PBX3 | TP53            |
| PBX3 | hsa-let-7a-5p   |
| PBX3 | hsa-miR-142-3p  |
| PBX3 | hsa-miR-150-5p  |
| PBX3 | hsa-miR-155-5p  |
| PBX3 | hsa-miR-1908-5p |
| PBX3 | hsa-miR-320a    |
| PBX3 | hsa-miR-4470    |
| PBX3 | hsa-miR-4651    |
| PBX3 | hsa-miR-663a    |
| PBX3 | hsa-miR-942-5p  |
| PBX3 | hsa-miR-935     |
| PBX3 | hsa-miR-92b-3p  |
| PBX3 | hsa-miR-8052    |
| PBX3 | hsa-miR-6880-5p |



|      |                 |
|------|-----------------|
| PBX3 | hsa-miR-6133    |
| PBX3 | hsa-miR-6127    |
| PBX3 | hsa-miR-5692a   |
| PBX3 | hsa-miR-548g-3p |
| PBX3 | hsa-miR-484     |
| PBX3 | hsa-miR-4650-5p |
| PBX3 | hsa-miR-4531    |
| PBX3 | hsa-miR-30a-5p  |
| PBX3 | hsa-miR-27a-3p  |
| PBX3 | hsa-miR-24-3p   |
| PBX3 | hsa-miR-199a-5p |
| PBX3 | hsa-miR-199a-3p |
| PBX3 | hsa-miR-1288-5p |
| PBX3 | hsa-miR-1207-5p |
| PBX3 | hsa-miR-107     |
| PBX3 | hsa-miR-106b-5p |
| PBX3 | hsa-miR-106b-3p |
| PGR  | HIF1A           |
| PGR  | IL6             |
| PGR  | hsa-miR-922     |
| PGR  | hsa-miR-6893-5p |
| PGR  | hsa-miR-6837-5p |
| PGR  | hsa-miR-6785-5p |
| PGR  | hsa-miR-625-3p  |
| PGR  | hsa-miR-589-5p  |
| PGR  | hsa-miR-589-3p  |
| PGR  | hsa-miR-5089-3p |
| PGR  | hsa-miR-494-3p  |
| PGR  | hsa-miR-4804-3p |
| PGR  | hsa-miR-4799-5p |
| PGR  | hsa-miR-4738-3p |
| PGR  | hsa-miR-4725-3p |
| PGR  | hsa-miR-4720-3p |
| PGR  | hsa-miR-4499    |
| PGR  | hsa-miR-4487    |
| PGR  | hsa-miR-375     |
| PGR  | hsa-miR-365b-5p |
| PGR  | hsa-miR-365a-5p |
| PGR  | hsa-miR-365a-3p |
| PGR  | hsa-miR-30d-5p  |

|        |                  |
|--------|------------------|
| PGR    | hsa-miR-26a-5p   |
| PGR    | hsa-miR-203a-3p  |
| PGR    | hsa-miR-1910-3p  |
| PGR    | hsa-miR-1909-3p  |
| PGR    | hsa-miR-181c-5p  |
| PGR    | hsa-miR-128-3p   |
| PGR    | hsa-miR-1273f    |
| PGR    | hsa-miR-1249-5p  |
| PGR    | hsa-miR-124-3p   |
| PGR    | hsa-miR-1234-3p  |
| PGR    | hsa-miR-107      |
| POU2F2 | HIF1A            |
| POU2F2 | NFKB1            |
| POU2F2 | STAT3            |
| POU2F2 | TGFB1            |
| POU2F2 | TNF              |
| POU2F2 | TP53             |
| POU2F2 | hsa-miR-1181     |
| POU2F2 | hsa-miR-155-5p   |
| POU2F2 | hsa-miR-320a     |
| POU2F2 | hsa-miR-6872-3p  |
| POU2F2 | hsa-miR-6807-5p  |
| POU2F2 | hsa-miR-6807-3p  |
| POU2F2 | hsa-miR-6511a-5p |
| POU2F2 | hsa-miR-612      |
| POU2F2 | hsa-miR-5196-3p  |
| POU2F2 | hsa-miR-4795-5p  |
| POU2F2 | hsa-miR-4736     |
| POU2F2 | hsa-miR-4651     |
| POU2F2 | hsa-miR-4434     |
| POU2F2 | hsa-miR-3662     |
| POU2F2 | hsa-miR-365a-5p  |
| POU2F2 | hsa-miR-365a-3p  |
| POU2F2 | hsa-miR-3199     |
| POU2F2 | hsa-miR-27a-3p   |
| POU2F2 | hsa-miR-24-3p    |
| POU2F2 | hsa-miR-150-5p   |
| POU2F2 | hsa-miR-146b-5p  |
| POU2F2 | hsa-miR-128-3p   |
| POU5F1 | HIF1A            |

|        |                 |
|--------|-----------------|
| POU5F1 | NFKB1           |
| POU5F1 | SMAD3           |
| POU5F1 | STAT3           |
| POU5F1 | TP53            |
| POU5F1 | IL6             |
| POU5F1 | PTGS2           |
| POU5F1 | TGFB1           |
| POU5F1 | hsa-miR-937-5p  |
| POU5F1 | hsa-miR-935     |
| POU5F1 | hsa-miR-92b-3p  |
| POU5F1 | hsa-miR-9-5p    |
| POU5F1 | hsa-miR-8085    |
| POU5F1 | hsa-miR-7158-5p |
| POU5F1 | hsa-miR-6875-3p |
| POU5F1 | hsa-miR-6872-3p |
| POU5F1 | hsa-miR-6808-5p |
| POU5F1 | hsa-miR-6785-5p |
| POU5F1 | hsa-miR-6760-5p |
| POU5F1 | hsa-miR-625-3p  |
| POU5F1 | hsa-miR-5692a   |
| POU5F1 | hsa-miR-548n    |
| POU5F1 | hsa-miR-5196-3p |
| POU5F1 | hsa-miR-504-5p  |
| POU5F1 | hsa-miR-484     |
| POU5F1 | hsa-miR-4799-5p |
| POU5F1 | hsa-miR-4795-5p |
| POU5F1 | hsa-miR-4763-3p |
| POU5F1 | hsa-miR-4738-3p |
| POU5F1 | hsa-miR-4725-3p |
| POU5F1 | hsa-miR-4650-5p |
| POU5F1 | hsa-miR-449c-5p |
| POU5F1 | hsa-miR-4487    |
| POU5F1 | hsa-miR-4463    |
| POU5F1 | hsa-miR-4434    |
| POU5F1 | hsa-miR-375     |
| POU5F1 | hsa-miR-365b-5p |
| POU5F1 | hsa-miR-365a-5p |
| POU5F1 | hsa-miR-365a-3p |
| POU5F1 | hsa-miR-34b-5p  |
| POU5F1 | hsa-miR-33a-5p  |

|        |                 |
|--------|-----------------|
| POU5F1 | hsa-miR-320a    |
| POU5F1 | hsa-miR-3160-3p |
| POU5F1 | hsa-miR-3128    |
| POU5F1 | hsa-miR-2682-5p |
| POU5F1 | hsa-miR-210-3p  |
| POU5F1 | hsa-miR-21-5p   |
| POU5F1 | hsa-miR-193b-3p |
| POU5F1 | hsa-miR-149-5p  |
| POU5F1 | hsa-miR-149-3p  |
| POU5F1 | hsa-miR-146b-5p |
| POU5F1 | hsa-miR-137     |
| POU5F1 | hsa-miR-132-3p  |
| POU5F1 | hsa-miR-130b-3p |
| POU5F1 | hsa-miR-128-3p  |
| POU5F1 | hsa-miR-125b-5p |
| POU5F1 | hsa-miR-124-3p  |
| POU5F1 | hsa-miR-1181    |
| POU5F1 | hsa-miR-107     |
| POU5F1 | hsa-let-7i-5p   |
| POU5F1 | hsa-let-7b-5p   |
| POU5F1 | hsa-let-7a-5p   |
| PPARG  | HIF1A           |
| PPARG  | STAT3           |
| PPARG  | TLR4            |
| PPARG  | hsa-miR-9-5p    |
| PPARG  | hsa-miR-6825-5p |
| PPARG  | hsa-miR-625-3p  |
| PPARG  | hsa-miR-612     |
| PPARG  | hsa-miR-5197-5p |
| PPARG  | hsa-miR-5193    |
| PPARG  | hsa-miR-4748    |
| PPARG  | hsa-miR-4684-5p |
| PPARG  | hsa-miR-4463    |
| PPARG  | hsa-miR-3668    |
| PPARG  | hsa-miR-34a-5p  |
| PPARG  | hsa-miR-3165    |
| PPARG  | hsa-miR-30e-5p  |
| PPARG  | hsa-miR-30d-5p  |
| PPARG  | hsa-miR-30a-5p  |
| PPARG  | hsa-miR-199a-5p |

|       |                 |
|-------|-----------------|
| PPARG | hsa-miR-199a-3p |
| PPARG | hsa-miR-1910-3p |
| PPARG | hsa-miR-185-5p  |
| PPARG | hsa-miR-145-5p  |
| PPARG | hsa-miR-1249-5p |
| PPARG | hsa-miR-1207-5p |
| PPARG | hsa-miR-107     |
| PPARG | hsa-miR-1-3p    |
| PRDM1 | HIF1A           |
| PRDM1 | IL6             |
| PRDM1 | STAT3           |
| PRDM1 | hsa-let-7c-5p   |
| PRDM1 | hsa-miR-30a-5p  |
| PRDM1 | hsa-miR-3199    |
| PRDM1 | hsa-miR-3609    |
| PRDM1 | hsa-miR-4470    |
| PRDM1 | hsa-miR-4698    |
| PRDM1 | hsa-miR-484     |
| PRDM1 | hsa-miR-491-5p  |
| PRDM1 | hsa-miR-504-5p  |
| PRDM1 | hsa-miR-663a    |
| PRDM1 | hsa-miR-942-5p  |
| PRDM1 | hsa-miR-99a-5p  |
| PRDM1 | hsa-miR-6751-5p |
| PRDM1 | hsa-miR-4720-3p |
| PRDM1 | hsa-miR-1207-5p |
| PRDM1 | hsa-let-7i-5p   |
| PROX1 | TGFB1           |
| PROX1 | hsa-miR-7150    |
| PROX1 | hsa-miR-449c-5p |
| PROX1 | hsa-miR-3165    |
| PROX1 | hsa-miR-296-3p  |
| PROX1 | hsa-miR-155-5p  |
| PROX1 | hsa-miR-1322    |
| PROX1 | hsa-miR-1249-5p |
| RARG  | HIF1A           |
| RARG  | PTGS2           |
| RARG  | STAT3           |
| RARG  | hsa-miR-6835-5p |
| RARG  | hsa-miR-6815-3p |

|       |                 |
|-------|-----------------|
| RARG  | hsa-miR-4651    |
| RARG  | hsa-miR-375     |
| RARG  | hsa-miR-320a    |
| RARG  | hsa-miR-22-3p   |
| RARG  | hsa-miR-2110    |
| RARG  | hsa-miR-194-3p  |
| RARG  | hsa-miR-1908-5p |
| RARG  | hsa-miR-150-5p  |
| RARG  | hsa-miR-1273f   |
| RARG  | hsa-miR-1181    |
| RCOR1 | HIF1A           |
| RCOR1 | IL6             |
| RCOR1 | NFKB1           |
| RCOR1 | PTGS2           |
| RCOR1 | SMAD3           |
| RCOR1 | STAT3           |
| RCOR1 | TGFB1           |
| RCOR1 | TLR4            |
| RCOR1 | TNF             |
| RCOR1 | TP53            |
| RCOR1 | hsa-miR-1181    |
| RCOR1 | hsa-miR-1207-5p |
| RCOR1 | hsa-miR-1249-5p |
| RCOR1 | hsa-miR-1288-5p |
| RCOR1 | hsa-miR-132-3p  |
| RCOR1 | hsa-miR-1322    |
| RCOR1 | hsa-miR-137     |
| RCOR1 | hsa-miR-143-3p  |
| RCOR1 | hsa-miR-145-5p  |
| RCOR1 | hsa-miR-155-5p  |
| RCOR1 | hsa-miR-21-5p   |
| RCOR1 | hsa-miR-2110    |
| RCOR1 | hsa-miR-22-3p   |
| RCOR1 | hsa-miR-26b-5p  |
| RCOR1 | hsa-miR-296-3p  |
| RCOR1 | hsa-miR-3128    |
| RCOR1 | hsa-miR-3160-3p |
| RCOR1 | hsa-miR-320a    |
| RCOR1 | hsa-miR-34a-5p  |
| RCOR1 | hsa-miR-3662    |

|       |                  |
|-------|------------------|
| RCOR1 | hsa-miR-4434     |
| RCOR1 | hsa-miR-4441     |
| RCOR1 | hsa-miR-4470     |
| RCOR1 | hsa-miR-484      |
| RCOR1 | hsa-miR-589-3p   |
| RCOR1 | hsa-miR-589-5p   |
| RCOR1 | hsa-miR-7-5p     |
| RCOR1 | hsa-miR-937-5p   |
| RCOR1 | hsa-miR-942-5p   |
| RCOR1 | hsa-miR-92b-3p   |
| RCOR1 | hsa-miR-9-5p     |
| RCOR1 | hsa-miR-6871-3p  |
| RCOR1 | hsa-miR-6833-3p  |
| RCOR1 | hsa-miR-6825-5p  |
| RCOR1 | hsa-miR-6815-3p  |
| RCOR1 | hsa-miR-6809-3p  |
| RCOR1 | hsa-miR-6785-5p  |
| RCOR1 | hsa-miR-6760-5p  |
| RCOR1 | hsa-miR-618      |
| RCOR1 | hsa-miR-5197-5p  |
| RCOR1 | hsa-miR-5193     |
| RCOR1 | hsa-miR-504-5p   |
| RCOR1 | hsa-miR-4795-5p  |
| RCOR1 | hsa-miR-4659b-3p |
| RCOR1 | hsa-miR-4659a-3p |
| RCOR1 | hsa-miR-4650-5p  |
| RCOR1 | hsa-miR-4290     |
| RCOR1 | hsa-miR-4286     |
| RCOR1 | hsa-miR-4271     |
| RCOR1 | hsa-miR-375      |
| RCOR1 | hsa-miR-365a-5p  |
| RCOR1 | hsa-miR-365a-3p  |
| RCOR1 | hsa-miR-34b-5p   |
| RCOR1 | hsa-miR-33a-5p   |
| RCOR1 | hsa-miR-3199     |
| RCOR1 | hsa-miR-30e-5p   |
| RCOR1 | hsa-miR-30b-5p   |
| RCOR1 | hsa-miR-30a-5p   |
| RCOR1 | hsa-miR-27a-3p   |
| RCOR1 | hsa-miR-26a-5p   |

|       |                 |
|-------|-----------------|
| RCOR1 | hsa-miR-24-3p   |
| RCOR1 | hsa-miR-223-3p  |
| RCOR1 | hsa-miR-199b-5p |
| RCOR1 | hsa-miR-199a-5p |
| RCOR1 | hsa-miR-199a-3p |
| RCOR1 | hsa-miR-195-5p  |
| RCOR1 | hsa-miR-193b-3p |
| RCOR1 | hsa-miR-181c-5p |
| RCOR1 | hsa-miR-150-5p  |
| RCOR1 | hsa-miR-146b-5p |
| RCOR1 | hsa-miR-146a-5p |
| RCOR1 | hsa-miR-144-3p  |
| RCOR1 | hsa-miR-139-5p  |
| RCOR1 | hsa-miR-138-5p  |
| RCOR1 | hsa-miR-130a-3p |
| RCOR1 | hsa-miR-1273f   |
| RCOR1 | hsa-miR-124-3p  |
| RCOR1 | hsa-miR-101-3p  |
| RCOR1 | hsa-let-7e-5p   |
| RCOR1 | hsa-let-7a-5p   |
| RELA  | HIF1A           |
| RELA  | IL10            |
| RELA  | NFKB1           |
| RELA  | PTGS2           |
| RELA  | SMAD3           |
| RELA  | STAT3           |
| RELA  | TGFB1           |
| RELA  | TLR4            |
| RELA  | TNF             |
| RELA  | TP53            |
| RELA  | IL17A           |
| RELA  | IL6             |
| RELA  | hsa-let-7i-5p   |
| RELA  | hsa-miR-1181    |
| RELA  | hsa-miR-1207-5p |
| RELA  | hsa-miR-142-3p  |
| RELA  | hsa-miR-146a-5p |
| RELA  | hsa-miR-155-5p  |
| RELA  | hsa-miR-1908-5p |
| RELA  | hsa-miR-195-5p  |



|      |                 |
|------|-----------------|
| RELA | hsa-miR-21-5p   |
| RELA | hsa-miR-2110    |
| RELA | hsa-miR-27a-3p  |
| RELA | hsa-miR-320a    |
| RELA | hsa-miR-365a-3p |
| RELA | hsa-miR-365a-5p |
| RELA | hsa-miR-4434    |
| RELA | hsa-miR-4651    |
| RELA | hsa-miR-4736    |
| RELA | hsa-miR-4799-5p |
| RELA | hsa-miR-484     |
| RELA | hsa-miR-612     |
| RELA | hsa-miR-663a    |
| RELA | hsa-miR-92b-3p  |
| RELA | hsa-miR-9-5p    |
| RELA | hsa-miR-8052    |
| RELA | hsa-miR-7-5p    |
| RELA | hsa-miR-6875-3p |
| RELA | hsa-miR-6872-3p |
| RELA | hsa-miR-6871-3p |
| RELA | hsa-miR-6845-3p |
| RELA | hsa-miR-6825-5p |
| RELA | hsa-miR-6789-3p |
| RELA | hsa-miR-6760-5p |
| RELA | hsa-miR-625-3p  |
| RELA | hsa-miR-618     |
| RELA | hsa-miR-589-5p  |
| RELA | hsa-miR-589-3p  |
| RELA | hsa-miR-5703    |
| RELA | hsa-miR-5196-3p |
| RELA | hsa-miR-5193    |
| RELA | hsa-miR-4795-5p |
| RELA | hsa-miR-4738-3p |
| RELA | hsa-miR-4697-3p |
| RELA | hsa-miR-4531    |
| RELA | hsa-miR-449c-5p |
| RELA | hsa-miR-4487    |
| RELA | hsa-miR-4470    |
| RELA | hsa-miR-3662    |
| RELA | hsa-miR-3199    |

|      |                  |
|------|------------------|
| RELA | hsa-miR-24-3p    |
| RELA | hsa-miR-223-3p   |
| RELA | hsa-miR-210-3p   |
| RELA | hsa-miR-193b-3p  |
| RELA | hsa-miR-17-5p    |
| RELA | hsa-miR-153-5p   |
| RELA | hsa-miR-150-5p   |
| RELA | hsa-miR-146b-5p  |
| RELA | hsa-miR-139-5p   |
| RELA | hsa-miR-138-5p   |
| RELA | hsa-miR-138-2-3p |
| RELA | hsa-miR-1322     |
| RELA | hsa-miR-130a-3p  |
| RELA | hsa-miR-128-3p   |
| RELA | hsa-miR-124-3p   |
| REST | STAT3            |
| REST | HIF1A            |
| REST | IL6              |
| REST | NFKB1            |
| REST | SMAD3            |
| REST | TP53             |
| REST | PTGS2            |
| REST | TGFB1            |
| REST | TLR4             |
| REST | TNF              |
| REST | hsa-let-7i-5p    |
| REST | hsa-miR-1181     |
| REST | hsa-miR-1207-5p  |
| REST | hsa-miR-124-3p   |
| REST | hsa-miR-128-3p   |
| REST | hsa-miR-130b-3p  |
| REST | hsa-miR-132-3p   |
| REST | hsa-miR-137      |
| REST | hsa-miR-138-5p   |
| REST | hsa-miR-139-5p   |
| REST | hsa-miR-142-3p   |
| REST | hsa-miR-17-5p    |
| REST | hsa-miR-18a-3p   |
| REST | hsa-miR-18a-5p   |
| REST | hsa-miR-1908-5p  |

|      |                  |
|------|------------------|
| REST | hsa-miR-21-5p    |
| REST | hsa-miR-22-3p    |
| REST | hsa-miR-320a     |
| REST | hsa-miR-4279     |
| REST | hsa-miR-4470     |
| REST | hsa-miR-4516     |
| REST | hsa-miR-4651     |
| REST | hsa-miR-4659a-3p |
| REST | hsa-miR-4659b-3p |
| REST | hsa-miR-4685-5p  |
| REST | hsa-miR-4738-3p  |
| REST | hsa-miR-484      |
| REST | hsa-miR-622      |
| REST | hsa-miR-663a     |
| REST | hsa-miR-7-5p     |
| REST | hsa-miR-9-5p     |
| REST | hsa-miR-942-5p   |
| REST | hsa-miR-935      |
| REST | hsa-miR-92b-3p   |
| REST | hsa-miR-92a-3p   |
| REST | hsa-miR-92a-1-5p |
| REST | hsa-miR-8071     |
| REST | hsa-miR-6875-3p  |
| REST | hsa-miR-6807-5p  |
| REST | hsa-miR-6807-3p  |
| REST | hsa-miR-6797-5p  |
| REST | hsa-miR-6789-3p  |
| REST | hsa-miR-6511a-5p |
| REST | hsa-miR-618      |
| REST | hsa-miR-5703     |
| REST | hsa-miR-5702     |
| REST | hsa-miR-5692a    |
| REST | hsa-miR-5197-5p  |
| REST | hsa-miR-5193     |
| REST | hsa-miR-5089-3p  |
| REST | hsa-miR-4795-5p  |
| REST | hsa-miR-4748     |
| REST | hsa-miR-4736     |
| REST | hsa-miR-4684-5p  |
| REST | hsa-miR-4662a-5p |

|      |                 |
|------|-----------------|
| REST | hsa-miR-4531    |
| REST | hsa-miR-4487    |
| REST | hsa-miR-4441    |
| REST | hsa-miR-3934-5p |
| REST | hsa-miR-380-5p  |
| REST | hsa-miR-375     |
| REST | hsa-miR-3662    |
| REST | hsa-miR-365a-5p |
| REST | hsa-miR-365a-3p |
| REST | hsa-miR-3199    |
| REST | hsa-miR-3121-3p |
| REST | hsa-miR-30a-5p  |
| REST | hsa-miR-27a-3p  |
| REST | hsa-miR-2682-5p |
| REST | hsa-miR-24-3p   |
| REST | hsa-miR-2110    |
| REST | hsa-miR-19a-3p  |
| REST | hsa-miR-199b-5p |
| REST | hsa-miR-199a-5p |
| REST | hsa-miR-199a-3p |
| REST | hsa-miR-194-3p  |
| REST | hsa-miR-193b-3p |
| REST | hsa-miR-16-5p   |
| REST | hsa-miR-15b-5p  |
| REST | hsa-miR-155-5p  |
| REST | hsa-miR-150-5p  |
| REST | hsa-miR-146b-5p |
| REST | hsa-miR-1468-3p |
| REST | hsa-miR-145-5p  |
| REST | hsa-miR-144-3p  |
| REST | hsa-miR-125b-5p |
| RFX1 | HIF1A           |
| RFX1 | PTGS2           |
| RFX1 | SMAD3           |
| RFX1 | STAT3           |
| RFX1 | TGFB1           |
| RFX1 | TP53            |
| RFX1 | hsa-miR-93-5p   |
| RFX1 | hsa-miR-6893-5p |
| RFX1 | hsa-miR-6751-5p |

|      |                  |
|------|------------------|
| RFX1 | hsa-miR-612      |
| RFX1 | hsa-miR-4763-3p  |
| RFX1 | hsa-miR-27a-3p   |
| RFX1 | hsa-miR-25-3p    |
| RFX1 | hsa-miR-24-3p    |
| RFX1 | hsa-miR-21-5p    |
| RFX1 | hsa-miR-203a-3p  |
| RFX1 | hsa-miR-194-3p   |
| RFX1 | hsa-miR-106b-5p  |
| RFX1 | hsa-miR-106b-3p  |
| RFX1 | hsa-let-7b-5p    |
| RFX2 | SMAD3            |
| RFX5 | HIF1A            |
| RFX5 | IL6              |
| RFX5 | NFKB1            |
| RFX5 | PTGS2            |
| RFX5 | SMAD3            |
| RFX5 | STAT3            |
| RFX5 | TGFB1            |
| RFX5 | TP53             |
| RFX5 | hsa-let-7i-5p    |
| RFX5 | hsa-miR-107      |
| RFX5 | hsa-miR-1181     |
| RFX5 | hsa-miR-17-5p    |
| RFX5 | hsa-miR-1908-5p  |
| RFX5 | hsa-miR-2110     |
| RFX5 | hsa-miR-22-3p    |
| RFX5 | hsa-miR-320a     |
| RFX5 | hsa-miR-4470     |
| RFX5 | hsa-miR-4651     |
| RFX5 | hsa-miR-9-5p     |
| RFX5 | hsa-miR-935      |
| RFX5 | hsa-miR-99a-5p   |
| RFX5 | hsa-miR-92b-3p   |
| RFX5 | hsa-miR-92a-3p   |
| RFX5 | hsa-miR-92a-1-5p |
| RFX5 | hsa-miR-7-5p     |
| RFX5 | hsa-miR-6875-3p  |
| RFX5 | hsa-miR-6872-3p  |
| RFX5 | hsa-miR-6825-5p  |

|       |                 |
|-------|-----------------|
| RFX5  | hsa-miR-6815-3p |
| RFX5  | hsa-miR-6809-3p |
| RFX5  | hsa-miR-6807-5p |
| RFX5  | hsa-miR-6807-3p |
| RFX5  | hsa-miR-6760-5p |
| RFX5  | hsa-miR-652-3p  |
| RFX5  | hsa-miR-622     |
| RFX5  | hsa-miR-612     |
| RFX5  | hsa-miR-5703    |
| RFX5  | hsa-miR-5197-5p |
| RFX5  | hsa-miR-5196-3p |
| RFX5  | hsa-miR-5193    |
| RFX5  | hsa-miR-504-5p  |
| RFX5  | hsa-miR-484     |
| RFX5  | hsa-miR-4795-5p |
| RFX5  | hsa-miR-4736    |
| RFX5  | hsa-miR-4531    |
| RFX5  | hsa-miR-449c-5p |
| RFX5  | hsa-miR-4434    |
| RFX5  | hsa-miR-4419a   |
| RFX5  | hsa-miR-4279    |
| RFX5  | hsa-miR-365a-5p |
| RFX5  | hsa-miR-365a-3p |
| RFX5  | hsa-miR-3199    |
| RFX5  | hsa-miR-3128    |
| RFX5  | hsa-miR-30a-5p  |
| RFX5  | hsa-miR-26a-5p  |
| RFX5  | hsa-miR-211-5p  |
| RFX5  | hsa-miR-210-3p  |
| RFX5  | hsa-miR-193b-3p |
| RFX5  | hsa-miR-181c-5p |
| RFX5  | hsa-miR-145-5p  |
| RFX5  | hsa-miR-138-5p  |
| RFX5  | hsa-miR-1273f   |
| RFX5  | hsa-miR-1264    |
| RFX5  | hsa-let-7c-5p   |
| RUNX1 | HIF1A           |
| RUNX1 | NFKB1           |
| RUNX1 | PTGS2           |
| RUNX1 | STAT3           |

|       |                  |
|-------|------------------|
| RUNX1 | TGFB1            |
| RUNX1 | TP53             |
| RUNX1 | hsa-let-7a-5p    |
| RUNX1 | hsa-miR-101-3p   |
| RUNX1 | hsa-miR-142-3p   |
| RUNX1 | hsa-miR-146a-5p  |
| RUNX1 | hsa-miR-150-5p   |
| RUNX1 | hsa-miR-153-5p   |
| RUNX1 | hsa-miR-155-5p   |
| RUNX1 | hsa-miR-181c-5p  |
| RUNX1 | hsa-miR-187-3p   |
| RUNX1 | hsa-miR-210-3p   |
| RUNX1 | hsa-miR-223-3p   |
| RUNX1 | hsa-miR-26b-5p   |
| RUNX1 | hsa-miR-30c-5p   |
| RUNX1 | hsa-miR-424-5p   |
| RUNX1 | hsa-miR-612      |
| RUNX1 | hsa-miR-937-5p   |
| RUNX1 | hsa-miR-92a-3p   |
| RUNX1 | hsa-miR-92a-2-5p |
| RUNX1 | hsa-miR-7158-5p  |
| RUNX1 | hsa-miR-6880-5p  |
| RUNX1 | hsa-miR-6871-3p  |
| RUNX1 | hsa-miR-6835-5p  |
| RUNX1 | hsa-miR-6780b-5p |
| RUNX1 | hsa-miR-630      |
| RUNX1 | hsa-miR-5681b    |
| RUNX1 | hsa-miR-5681a    |
| RUNX1 | hsa-miR-548ah-5p |
| RUNX1 | hsa-miR-5197-5p  |
| RUNX1 | hsa-miR-5193     |
| RUNX1 | hsa-miR-4804-3p  |
| RUNX1 | hsa-miR-4720-3p  |
| RUNX1 | hsa-miR-4487     |
| RUNX1 | hsa-miR-4290     |
| RUNX1 | hsa-miR-4279     |
| RUNX1 | hsa-miR-3934-5p  |
| RUNX1 | hsa-miR-365a-5p  |
| RUNX1 | hsa-miR-365a-3p  |
| RUNX1 | hsa-miR-3199     |

|       |                 |
|-------|-----------------|
| RUNX1 | hsa-miR-27a-3p  |
| RUNX1 | hsa-miR-24-3p   |
| RUNX1 | hsa-miR-200a-3p |
| RUNX1 | hsa-miR-199b-5p |
| RUNX1 | hsa-miR-195-5p  |
| RUNX1 | hsa-miR-1909-3p |
| RUNX1 | hsa-miR-149-5p  |
| RUNX1 | hsa-miR-149-3p  |
| RUNX1 | hsa-miR-1288-5p |
| RUNX1 | hsa-miR-128-3p  |
| RUNX3 | HIF1A           |
| RUNX3 | IL10            |
| RUNX3 | IL17A           |
| RUNX3 | IL6             |
| RUNX3 | NFKB1           |
| RUNX3 | PTGS2           |
| RUNX3 | STAT3           |
| RUNX3 | TGFB1           |
| RUNX3 | TNF             |
| RUNX3 | TP53            |
| RUNX3 | hsa-miR-1322    |
| RUNX3 | hsa-miR-2110    |
| RUNX3 | hsa-miR-320a    |
| RUNX3 | hsa-miR-365a-3p |
| RUNX3 | hsa-miR-365a-5p |
| RUNX3 | hsa-miR-484     |
| RUNX3 | hsa-miR-589-3p  |
| RUNX3 | hsa-miR-589-5p  |
| RUNX3 | hsa-miR-92b-3p  |
| RUNX3 | hsa-miR-9-5p    |
| RUNX3 | hsa-miR-7-5p    |
| RUNX3 | hsa-miR-6875-3p |
| RUNX3 | hsa-miR-6872-3p |
| RUNX3 | hsa-miR-6871-3p |
| RUNX3 | hsa-miR-6825-5p |
| RUNX3 | hsa-miR-6760-5p |
| RUNX3 | hsa-miR-625-3p  |
| RUNX3 | hsa-miR-612     |
| RUNX3 | hsa-miR-5703    |
| RUNX3 | hsa-miR-5193    |



|       |                  |
|-------|------------------|
| RUNX3 | hsa-miR-5094     |
| RUNX3 | hsa-miR-4799-5p  |
| RUNX3 | hsa-miR-4795-5p  |
| RUNX3 | hsa-miR-4659b-3p |
| RUNX3 | hsa-miR-4659a-3p |
| RUNX3 | hsa-miR-4531     |
| RUNX3 | hsa-miR-449c-5p  |
| RUNX3 | hsa-miR-4487     |
| RUNX3 | hsa-miR-4434     |
| RUNX3 | hsa-miR-4270     |
| RUNX3 | hsa-miR-3662     |
| RUNX3 | hsa-miR-3529-3p  |
| RUNX3 | hsa-miR-3199     |
| RUNX3 | hsa-miR-30e-5p   |
| RUNX3 | hsa-miR-223-3p   |
| RUNX3 | hsa-miR-210-3p   |
| RUNX3 | hsa-miR-199b-5p  |
| RUNX3 | hsa-miR-195-5p   |
| RUNX3 | hsa-miR-193b-3p  |
| RUNX3 | hsa-miR-150-5p   |
| RUNX3 | hsa-miR-146b-5p  |
| RUNX3 | hsa-miR-142-3p   |
| RUNX3 | hsa-miR-139-5p   |
| RUNX3 | hsa-miR-138-5p   |
| RUNX3 | hsa-miR-132-3p   |
| RUNX3 | hsa-miR-128-3p   |
| RUNX3 | hsa-miR-124-3p   |
| RUNX3 | hsa-miR-1207-5p  |
| RUNX3 | hsa-let-7a-5p    |
| RXRA  | HIF1A            |
| RXRA  | PTGS2            |
| RXRA  | SMAD3            |
| RXRA  | STAT3            |
| RXRA  | TGFB1            |
| RXRA  | TLR4             |
| RXRA  | TP53             |
| RXRA  | hsa-let-7i-5p    |
| RXRA  | hsa-miR-142-3p   |
| RXRA  | hsa-miR-21-5p    |
| RXRA  | hsa-miR-4516     |

|        |                  |
|--------|------------------|
| RXRA   | hsa-miR-4651     |
| RXRA   | hsa-miR-4736     |
| RXRA   | hsa-miR-663a     |
| RXRA   | hsa-miR-7-5p     |
| RXRA   | hsa-miR-6880-5p  |
| RXRA   | hsa-miR-6722-3p  |
| RXRA   | hsa-miR-6511a-5p |
| RXRA   | hsa-miR-4763-3p  |
| RXRA   | hsa-miR-375      |
| RXRA   | hsa-miR-30c-5p   |
| RXRA   | hsa-miR-26a-5p   |
| RXRA   | hsa-miR-22-3p    |
| RXRA   | hsa-miR-199a-5p  |
| RXRA   | hsa-miR-199a-3p  |
| RXRA   | hsa-miR-1288-5p  |
| RXRA   | hsa-miR-107      |
| RXRA   | hsa-let-7b-5p    |
| SALL4  | HIF1A            |
| SALL4  | SMAD3            |
| SALL4  | hsa-miR-9-5p     |
| SALL4  | hsa-miR-5095     |
| SALL4  | hsa-miR-128-3p   |
| SETDB1 | HIF1A            |
| SETDB1 | NFKB1            |
| SETDB1 | PTGS2            |
| SETDB1 | SMAD3            |
| SETDB1 | STAT3            |
| SETDB1 | TP53             |
| SETDB1 | hsa-let-7i-5p    |
| SETDB1 | hsa-miR-153-5p   |
| SETDB1 | hsa-miR-155-5p   |
| SETDB1 | hsa-miR-17-5p    |
| SETDB1 | hsa-miR-18a-3p   |
| SETDB1 | hsa-miR-18a-5p   |
| SETDB1 | hsa-miR-19a-3p   |
| SETDB1 | hsa-miR-20a-5p   |
| SETDB1 | hsa-miR-4470     |
| SETDB1 | hsa-miR-663a     |
| SETDB1 | hsa-miR-9-5p     |
| SETDB1 | hsa-miR-92a-3p   |

|        |                  |
|--------|------------------|
| SETDB1 | hsa-miR-92a-1-5p |
| SETDB1 | hsa-miR-922      |
| SETDB1 | hsa-miR-7-5p     |
| SETDB1 | hsa-miR-6875-3p  |
| SETDB1 | hsa-miR-6760-5p  |
| SETDB1 | hsa-miR-622      |
| SETDB1 | hsa-miR-589-5p   |
| SETDB1 | hsa-miR-589-3p   |
| SETDB1 | hsa-miR-5193     |
| SETDB1 | hsa-miR-4662a-5p |
| SETDB1 | hsa-miR-4659b-3p |
| SETDB1 | hsa-miR-4659a-3p |
| SETDB1 | hsa-miR-4510     |
| SETDB1 | hsa-miR-4434     |
| SETDB1 | hsa-miR-4290     |
| SETDB1 | hsa-miR-4286     |
| SETDB1 | hsa-miR-3165     |
| SETDB1 | hsa-miR-29b-3p   |
| SETDB1 | hsa-miR-19b-3p   |
| SETDB1 | hsa-miR-1909-3p  |
| SETDB1 | hsa-miR-181c-5p  |
| SETDB1 | hsa-miR-144-3p   |
| SETDB1 | hsa-miR-1207-5p  |
| SETDB1 | hsa-miR-1181     |
| SIX5   | SMAD3            |
| SIX5   | STAT3            |
| SIX5   | TGFB1            |
| SIX5   | TP53             |
| SIX5   | hsa-miR-320a     |
| SIX5   | hsa-miR-4516     |
| SIX5   | hsa-miR-4651     |
| SIX5   | hsa-miR-4738-3p  |
| SIX5   | hsa-miR-663a     |
| SIX5   | hsa-miR-6789-3p  |
| SIX5   | hsa-miR-5703     |
| SIX5   | hsa-miR-4795-5p  |
| SIX5   | hsa-miR-27a-3p   |
| SIX5   | hsa-miR-24-3p    |
| SIX5   | hsa-miR-22-3p    |
| SIX5   | hsa-miR-210-3p   |

|       |                  |
|-------|------------------|
| SIX5  | hsa-miR-1908-5p  |
| SIX5  | hsa-miR-150-5p   |
| SIX5  | hsa-miR-145-5p   |
| SIX5  | hsa-miR-142-3p   |
| SMAD1 | HIF1A            |
| SMAD1 | NFKB1            |
| SMAD1 | PTGS2            |
| SMAD1 | SMAD3            |
| SMAD1 | STAT3            |
| SMAD1 | TGFB1            |
| SMAD1 | TP53             |
| SMAD1 | hsa-miR-935      |
| SMAD1 | hsa-miR-92b-3p   |
| SMAD1 | hsa-miR-9-5p     |
| SMAD1 | hsa-miR-8085     |
| SMAD1 | hsa-miR-6875-3p  |
| SMAD1 | hsa-miR-6872-3p  |
| SMAD1 | hsa-miR-6845-3p  |
| SMAD1 | hsa-miR-6785-5p  |
| SMAD1 | hsa-miR-6511a-5p |
| SMAD1 | hsa-miR-589-5p   |
| SMAD1 | hsa-miR-589-3p   |
| SMAD1 | hsa-miR-5703     |
| SMAD1 | hsa-miR-504-5p   |
| SMAD1 | hsa-miR-484      |
| SMAD1 | hsa-miR-4795-5p  |
| SMAD1 | hsa-miR-4738-3p  |
| SMAD1 | hsa-miR-4720-3p  |
| SMAD1 | hsa-miR-4651     |
| SMAD1 | hsa-miR-454-3p   |
| SMAD1 | hsa-miR-4516     |
| SMAD1 | hsa-miR-449c-5p  |
| SMAD1 | hsa-miR-4470     |
| SMAD1 | hsa-miR-4434     |
| SMAD1 | hsa-miR-375      |
| SMAD1 | hsa-miR-34b-5p   |
| SMAD1 | hsa-miR-3199     |
| SMAD1 | hsa-miR-3165     |
| SMAD1 | hsa-miR-3074-3p  |
| SMAD1 | hsa-miR-3065-5p  |

|       |                 |
|-------|-----------------|
| SMAD1 | hsa-miR-2682-5p |
| SMAD1 | hsa-miR-24-3p   |
| SMAD1 | hsa-miR-22-3p   |
| SMAD1 | hsa-miR-2110    |
| SMAD1 | hsa-miR-210-3p  |
| SMAD1 | hsa-miR-21-5p   |
| SMAD1 | hsa-miR-203a-3p |
| SMAD1 | hsa-miR-200a-3p |
| SMAD1 | hsa-miR-199a-5p |
| SMAD1 | hsa-miR-199a-3p |
| SMAD1 | hsa-miR-194-3p  |
| SMAD1 | hsa-miR-1908-5p |
| SMAD1 | hsa-miR-149-5p  |
| SMAD1 | hsa-miR-149-3p  |
| SMAD1 | hsa-miR-138-5p  |
| SMAD1 | hsa-miR-137     |
| SMAD1 | hsa-miR-132-3p  |
| SMAD1 | hsa-miR-130b-3p |
| SMAD1 | hsa-miR-124-3p  |
| SMAD1 | hsa-miR-1234-3p |
| SMAD1 | hsa-miR-1207-5p |
| SMAD1 | hsa-miR-1181    |
| SMAD1 | hsa-let-7i-5p   |
| SMAD2 | TGFB1           |
| SMAD2 | IL2             |
| SMAD2 | SMAD3           |
| SMAD2 | TNF             |
| SMAD2 | hsa-miR-98-5p   |
| SMAD2 | hsa-miR-744-5p  |
| SMAD2 | hsa-miR-7158-5p |
| SMAD2 | hsa-miR-7150    |
| SMAD2 | hsa-miR-7113-5p |
| SMAD2 | hsa-miR-6883-5p |
| SMAD2 | hsa-miR-6882-5p |
| SMAD2 | hsa-miR-6878-5p |
| SMAD2 | hsa-miR-6845-3p |
| SMAD2 | hsa-miR-6807-5p |
| SMAD2 | hsa-miR-6807-3p |
| SMAD2 | hsa-miR-6778-5p |
| SMAD2 | hsa-miR-6755-5p |

|       |                  |
|-------|------------------|
| SMAD2 | hsa-miR-6722-3p  |
| SMAD2 | hsa-miR-660-3p   |
| SMAD2 | hsa-miR-652-3p   |
| SMAD2 | hsa-miR-630      |
| SMAD2 | hsa-miR-612      |
| SMAD2 | hsa-miR-605-5p   |
| SMAD2 | hsa-miR-5703     |
| SMAD2 | hsa-miR-5702     |
| SMAD2 | hsa-miR-5581-3p  |
| SMAD2 | hsa-miR-519c-3p  |
| SMAD2 | hsa-miR-5197-5p  |
| SMAD2 | hsa-miR-5196-3p  |
| SMAD2 | hsa-miR-513b-3p  |
| SMAD2 | hsa-miR-509-5p   |
| SMAD2 | hsa-miR-509-3-5p |
| SMAD2 | hsa-miR-5089-3p  |
| SMAD2 | hsa-miR-504-5p   |
| SMAD2 | hsa-miR-5003-5p  |
| SMAD2 | hsa-miR-4795-5p  |
| SMAD2 | hsa-miR-4778-3p  |
| SMAD2 | hsa-miR-4763-3p  |
| SMAD2 | hsa-miR-4742-3p  |
| SMAD2 | hsa-miR-4728-5p  |
| SMAD2 | hsa-miR-4698     |
| SMAD2 | hsa-miR-4684-5p  |
| SMAD2 | hsa-miR-454-3p   |
| SMAD2 | hsa-miR-4499     |
| SMAD2 | hsa-miR-4487     |
| SMAD2 | hsa-miR-4470     |
| SMAD2 | hsa-miR-4463     |
| SMAD2 | hsa-miR-4419a    |
| SMAD2 | hsa-miR-4418     |
| SMAD2 | hsa-miR-4290     |
| SMAD2 | hsa-miR-4286     |
| SMAD2 | hsa-miR-4282     |
| SMAD2 | hsa-miR-4270     |
| SMAD2 | hsa-miR-424-5p   |
| SMAD2 | hsa-miR-380-5p   |
| SMAD2 | hsa-miR-365a-5p  |
| SMAD2 | hsa-miR-365a-3p  |

|       |                  |
|-------|------------------|
| SMAD2 | hsa-miR-3609     |
| SMAD2 | hsa-miR-34b-5p   |
| SMAD2 | hsa-miR-3121-3p  |
| SMAD2 | hsa-miR-31-5p    |
| SMAD2 | hsa-miR-30c-5p   |
| SMAD2 | hsa-miR-30b-5p   |
| SMAD2 | hsa-miR-3074-3p  |
| SMAD2 | hsa-miR-26b-5p   |
| SMAD2 | hsa-miR-2682-5p  |
| SMAD2 | hsa-miR-24-3p    |
| SMAD2 | hsa-miR-222-3p   |
| SMAD2 | hsa-miR-214-3p   |
| SMAD2 | hsa-miR-194-3p   |
| SMAD2 | hsa-miR-193b-3p  |
| SMAD2 | hsa-miR-181c-5p  |
| SMAD2 | hsa-miR-153-5p   |
| SMAD2 | hsa-miR-1285-3p  |
| SMAD2 | hsa-miR-128-3p   |
| SMAD2 | hsa-miR-125b-5p  |
| SMAD2 | hsa-miR-125a-5p  |
| SMAD2 | hsa-miR-1181     |
| SMAD2 | hsa-miR-107      |
| SMAD2 | hsa-miR-101-3p   |
| SMAD2 | hsa-let-7b-5p    |
| SMAD2 | hsa-let-7a-5p    |
| SMAD3 | STAT3            |
| SMAD3 | hsa-miR-663a     |
| SMAD3 | hsa-miR-4799-5p  |
| SMAD3 | hsa-miR-21-5p    |
| SMAD4 | HIF1A            |
| SMAD4 | PTGS2            |
| SMAD4 | SMAD3            |
| SMAD4 | STAT3            |
| SMAD4 | TGFB1            |
| SMAD4 | TP53             |
| SMAD4 | hsa-miR-935      |
| SMAD4 | hsa-miR-92a-3p   |
| SMAD4 | hsa-miR-92a-1-5p |
| SMAD4 | hsa-miR-9-5p     |
| SMAD4 | hsa-miR-6893-5p  |

|         |                  |
|---------|------------------|
| SMAD4   | hsa-miR-6511a-5p |
| SMAD4   | hsa-miR-504-5p   |
| SMAD4   | hsa-miR-484      |
| SMAD4   | hsa-miR-3658     |
| SMAD4   | hsa-miR-22-3p    |
| SMAD4   | hsa-miR-21-5p    |
| SMAD4   | hsa-miR-20a-5p   |
| SMAD4   | hsa-miR-19b-3p   |
| SMAD4   | hsa-miR-19a-3p   |
| SMAD4   | hsa-miR-18a-5p   |
| SMAD4   | hsa-miR-18a-3p   |
| SMAD4   | hsa-miR-17-5p    |
| SMAD4   | hsa-miR-1249-5p  |
| SMAD4   | hsa-miR-124-3p   |
| SMAD4   | hsa-miR-1234-3p  |
| SMAD4   | hsa-let-7i-5p    |
| SMARCC1 | HIF1A            |
| SMARCC1 | NFKB1            |
| SMARCC1 | PTGS2            |
| SMARCC1 | SMAD3            |
| SMARCC1 | STAT3            |
| SMARCC1 | TLR4             |
| SMARCC1 | TP53             |
| SMARCC1 | hsa-miR-1181     |
| SMARCC1 | hsa-miR-2110     |
| SMARCC1 | hsa-miR-92b-3p   |
| SMARCC1 | hsa-miR-7113-5p  |
| SMARCC1 | hsa-miR-6825-5p  |
| SMARCC1 | hsa-miR-4279     |
| SMARCC1 | hsa-miR-365a-5p  |
| SMARCC1 | hsa-miR-365a-3p  |
| SMARCC1 | hsa-miR-145-5p   |
| SMARCC1 | hsa-miR-1273f    |
| SMARCC2 | HIF1A            |
| SMARCC2 | IL6              |
| SMARCC2 | NFKB1            |
| SMARCC2 | PTGS2            |
| SMARCC2 | STAT3            |
| SMARCC2 | TLR4             |
| SMARCC2 | TP53             |



|         |                  |
|---------|------------------|
| SMARCC2 | hsa-miR-2110     |
| SMARCC2 | hsa-miR-4738-3p  |
| SMARCC2 | hsa-miR-663a     |
| SMARCC2 | hsa-miR-7-5p     |
| SMARCC2 | hsa-miR-3165     |
| SMARCC2 | hsa-miR-181c-5p  |
| SMARCC2 | hsa-miR-130a-3p  |
| SNAI2   | PTGS2            |
| SNAI2   | STAT3            |
| SNAI2   | TGFB1            |
| SNAI2   | HIF1A            |
| SNAI2   | NFKB1            |
| SNAI2   | hsa-miR-940      |
| SNAI2   | hsa-miR-937-5p   |
| SNAI2   | hsa-miR-935      |
| SNAI2   | hsa-miR-93-5p    |
| SNAI2   | hsa-miR-9-5p     |
| SNAI2   | hsa-miR-7150     |
| SNAI2   | hsa-miR-7113-5p  |
| SNAI2   | hsa-miR-6880-5p  |
| SNAI2   | hsa-miR-6875-3p  |
| SNAI2   | hsa-miR-6872-3p  |
| SNAI2   | hsa-miR-6835-5p  |
| SNAI2   | hsa-miR-6815-3p  |
| SNAI2   | hsa-miR-6809-3p  |
| SNAI2   | hsa-miR-6808-5p  |
| SNAI2   | hsa-miR-6754-5p  |
| SNAI2   | hsa-miR-6511a-5p |
| SNAI2   | hsa-miR-618      |
| SNAI2   | hsa-miR-589-5p   |
| SNAI2   | hsa-miR-589-3p   |
| SNAI2   | hsa-miR-5703     |
| SNAI2   | hsa-miR-5193     |
| SNAI2   | hsa-miR-4531     |
| SNAI2   | hsa-miR-4516     |
| SNAI2   | hsa-miR-449c-5p  |
| SNAI2   | hsa-miR-4487     |
| SNAI2   | hsa-miR-4434     |
| SNAI2   | hsa-miR-4286     |
| SNAI2   | hsa-miR-375      |

|       |                 |
|-------|-----------------|
| SNAI2 | hsa-miR-3199    |
| SNAI2 | hsa-miR-2682-5p |
| SNAI2 | hsa-miR-25-3p   |
| SNAI2 | hsa-miR-210-3p  |
| SNAI2 | hsa-miR-200a-3p |
| SNAI2 | hsa-miR-1909-3p |
| SNAI2 | hsa-miR-1908-5p |
| SNAI2 | hsa-miR-150-5p  |
| SNAI2 | hsa-miR-149-5p  |
| SNAI2 | hsa-miR-149-3p  |
| SNAI2 | hsa-miR-142-3p  |
| SNAI2 | hsa-miR-137     |
| SNAI2 | hsa-miR-132-3p  |
| SNAI2 | hsa-miR-130b-3p |
| SNAI2 | hsa-miR-1234-3p |
| SNAI2 | hsa-miR-1233-5p |
| SNAI2 | hsa-miR-106b-5p |
| SNAI2 | hsa-miR-106b-3p |
| SNAI2 | hsa-miR-1-3p    |
| SOX17 | SMAD3           |
| SOX17 | TP53            |
| SOX17 | hsa-miR-1207-5p |
| SOX2  | HIF1A           |
| SOX2  | IL2             |
| SOX2  | NFKB1           |
| SOX2  | STAT3           |
| SOX2  | TP53            |
| SOX2  | SMAD3           |
| SOX2  | hsa-miR-9-5p    |
| SOX2  | hsa-miR-874-3p  |
| SOX2  | hsa-miR-7158-5p |
| SOX2  | hsa-miR-7113-5p |
| SOX2  | hsa-miR-7-5p    |
| SOX2  | hsa-miR-6875-3p |
| SOX2  | hsa-miR-6789-3p |
| SOX2  | hsa-miR-6760-5p |
| SOX2  | hsa-miR-6755-5p |
| SOX2  | hsa-miR-663a    |
| SOX2  | hsa-miR-5702    |
| SOX2  | hsa-miR-548g-3p |

|      |                 |
|------|-----------------|
| SOX2 | hsa-miR-519c-3p |
| SOX2 | hsa-miR-513b-3p |
| SOX2 | hsa-miR-5094    |
| SOX2 | hsa-miR-484     |
| SOX2 | hsa-miR-4738-3p |
| SOX2 | hsa-miR-4720-3p |
| SOX2 | hsa-miR-4684-5p |
| SOX2 | hsa-miR-4531    |
| SOX2 | hsa-miR-4487    |
| SOX2 | hsa-miR-4470    |
| SOX2 | hsa-miR-4279    |
| SOX2 | hsa-miR-3934-5p |
| SOX2 | hsa-miR-324-5p  |
| SOX2 | hsa-miR-324-3p  |
| SOX2 | hsa-miR-320a    |
| SOX2 | hsa-miR-3165    |
| SOX2 | hsa-miR-3160-3p |
| SOX2 | hsa-miR-3128    |
| SOX2 | hsa-miR-30c-5p  |
| SOX2 | hsa-miR-27a-3p  |
| SOX2 | hsa-miR-24-3p   |
| SOX2 | hsa-miR-2110    |
| SOX2 | hsa-miR-210-3p  |
| SOX2 | hsa-miR-21-5p   |
| SOX2 | hsa-miR-203a-3p |
| SOX2 | hsa-miR-181a-5p |
| SOX2 | hsa-miR-16-5p   |
| SOX2 | hsa-miR-15b-5p  |
| SOX2 | hsa-miR-153-5p  |
| SOX2 | hsa-miR-146a-5p |
| SOX2 | hsa-miR-1468-3p |
| SOX2 | hsa-miR-144-3p  |
| SOX2 | hsa-miR-1322    |
| SOX2 | hsa-miR-132-3p  |
| SOX2 | hsa-miR-130a-3p |
| SOX2 | hsa-miR-128-3p  |
| SOX2 | hsa-miR-1273f   |
| SOX2 | hsa-miR-1249-5p |
| SOX2 | hsa-miR-124-3p  |
| SOX2 | hsa-miR-1234-3p |

|      |                 |
|------|-----------------|
| SOX2 | hsa-miR-1181    |
| SOX2 | hsa-miR-101-3p  |
| SOX2 | hsa-let-7i-5p   |
| SOX2 | hsa-let-7a-5p   |
| SOX4 | IL6             |
| SOX4 | PTGS2           |
| SOX4 | STAT3           |
| SOX4 | hsa-miR-1207-5p |
| SOX9 | TGFB1           |
| SOX9 | hsa-miR-589-5p  |
| SOX9 | hsa-miR-589-3p  |
| SOX9 | hsa-miR-194-3p  |
| SP1  | HIF1A           |
| SP1  | NFKB1           |
| SP1  | PTGS2           |
| SP1  | SMAD3           |
| SP1  | STAT3           |
| SP1  | TGFB1           |
| SP1  | TNF             |
| SP1  | TP53            |
| SP1  | hsa-let-7a-5p   |
| SP1  | hsa-miR-1181    |
| SP1  | hsa-miR-17-5p   |
| SP1  | hsa-miR-18a-3p  |
| SP1  | hsa-miR-18a-5p  |
| SP1  | hsa-miR-19a-3p  |
| SP1  | hsa-miR-20a-5p  |
| SP1  | hsa-miR-2110    |
| SP1  | hsa-miR-3165    |
| SP1  | hsa-miR-4470    |
| SP1  | hsa-miR-4651    |
| SP1  | hsa-miR-9-5p    |
| SP1  | hsa-miR-940     |
| SP1  | hsa-miR-935     |
| SP1  | hsa-miR-93-5p   |
| SP1  | hsa-miR-92b-3p  |
| SP1  | hsa-miR-8085    |
| SP1  | hsa-miR-8071    |
| SP1  | hsa-miR-7-5p    |
| SP1  | hsa-miR-6893-5p |

|     |                  |
|-----|------------------|
| SP1 | hsa-miR-6883-5p  |
| SP1 | hsa-miR-6875-3p  |
| SP1 | hsa-miR-6872-3p  |
| SP1 | hsa-miR-6845-3p  |
| SP1 | hsa-miR-6825-5p  |
| SP1 | hsa-miR-6815-3p  |
| SP1 | hsa-miR-6809-3p  |
| SP1 | hsa-miR-6808-5p  |
| SP1 | hsa-miR-6807-5p  |
| SP1 | hsa-miR-6807-3p  |
| SP1 | hsa-miR-6797-5p  |
| SP1 | hsa-miR-6789-3p  |
| SP1 | hsa-miR-6785-5p  |
| SP1 | hsa-miR-6760-5p  |
| SP1 | hsa-miR-6751-5p  |
| SP1 | hsa-miR-663a     |
| SP1 | hsa-miR-6511a-5p |
| SP1 | hsa-miR-625-3p   |
| SP1 | hsa-miR-589-5p   |
| SP1 | hsa-miR-589-3p   |
| SP1 | hsa-miR-5703     |
| SP1 | hsa-miR-5702     |
| SP1 | hsa-miR-5193     |
| SP1 | hsa-miR-484      |
| SP1 | hsa-miR-4799-5p  |
| SP1 | hsa-miR-4738-3p  |
| SP1 | hsa-miR-4697-3p  |
| SP1 | hsa-miR-4531     |
| SP1 | hsa-miR-4516     |
| SP1 | hsa-miR-449c-5p  |
| SP1 | hsa-miR-4487     |
| SP1 | hsa-miR-4434     |
| SP1 | hsa-miR-375      |
| SP1 | hsa-miR-365a-5p  |
| SP1 | hsa-miR-365a-3p  |
| SP1 | hsa-miR-33a-5p   |
| SP1 | hsa-miR-320a     |
| SP1 | hsa-miR-30c-5p   |
| SP1 | hsa-miR-27a-3p   |
| SP1 | hsa-miR-26b-5p   |

|     |                 |
|-----|-----------------|
| SP1 | hsa-miR-2682-5p |
| SP1 | hsa-miR-25-3p   |
| SP1 | hsa-miR-24-3p   |
| SP1 | hsa-miR-22-3p   |
| SP1 | hsa-miR-210-3p  |
| SP1 | hsa-miR-21-5p   |
| SP1 | hsa-miR-203a-3p |
| SP1 | hsa-miR-200a-3p |
| SP1 | hsa-miR-199b-5p |
| SP1 | hsa-miR-193b-3p |
| SP1 | hsa-miR-1909-3p |
| SP1 | hsa-miR-1908-5p |
| SP1 | hsa-miR-185-5p  |
| SP1 | hsa-miR-150-5p  |
| SP1 | hsa-miR-149-5p  |
| SP1 | hsa-miR-149-3p  |
| SP1 | hsa-miR-145-5p  |
| SP1 | hsa-miR-142-3p  |
| SP1 | hsa-miR-137     |
| SP1 | hsa-miR-132-3p  |
| SP1 | hsa-miR-130b-3p |
| SP1 | hsa-miR-128-3p  |
| SP1 | hsa-miR-125a-5p |
| SP1 | hsa-miR-124-3p  |
| SP1 | hsa-miR-1233-5p |
| SP1 | hsa-miR-101-3p  |
| SP1 | hsa-miR-100-5p  |
| SP1 | hsa-let-7i-5p   |
| SP1 | hsa-let-7e-5p   |
| SP2 | HIF1A           |
| SP2 | STAT3           |
| SP2 | hsa-miR-210-3p  |
| SP2 | hsa-miR-663a    |
| SP3 | STAT3           |
| SP3 | hsa-miR-1273f   |
| SP4 | HIF1A           |
| SP4 | STAT3           |
| SP4 | TGFB1           |
| SP4 | TP53            |
| SP4 | hsa-miR-8085    |

|       |                  |
|-------|------------------|
| SP4   | hsa-miR-6872-3p  |
| SP4   | hsa-miR-124-3p   |
| SPDEF | HIF1A            |
| SPDEF | NFKB1            |
| SPDEF | SMAD3            |
| SPDEF | STAT3            |
| SPDEF | TNF              |
| SPDEF | TP53             |
| SPDEF | PTGS2            |
| SPDEF | TGFB1            |
| SPDEF | hsa-miR-942-5p   |
| SPDEF | hsa-miR-940      |
| SPDEF | hsa-miR-937-5p   |
| SPDEF | hsa-miR-935      |
| SPDEF | hsa-miR-922      |
| SPDEF | hsa-miR-9-5p     |
| SPDEF | hsa-miR-889-3p   |
| SPDEF | hsa-miR-877-3p   |
| SPDEF | hsa-miR-7151-3p  |
| SPDEF | hsa-miR-7150     |
| SPDEF | hsa-miR-7113-5p  |
| SPDEF | hsa-miR-6893-5p  |
| SPDEF | hsa-miR-6883-5p  |
| SPDEF | hsa-miR-6882-5p  |
| SPDEF | hsa-miR-6880-5p  |
| SPDEF | hsa-miR-6871-3p  |
| SPDEF | hsa-miR-6835-5p  |
| SPDEF | hsa-miR-6833-3p  |
| SPDEF | hsa-miR-6809-3p  |
| SPDEF | hsa-miR-6807-5p  |
| SPDEF | hsa-miR-6807-3p  |
| SPDEF | hsa-miR-6806-5p  |
| SPDEF | hsa-miR-6803-5p  |
| SPDEF | hsa-miR-6785-5p  |
| SPDEF | hsa-miR-6780b-5p |
| SPDEF | hsa-miR-6778-5p  |
| SPDEF | hsa-miR-6766-5p  |
| SPDEF | hsa-miR-6762-3p  |
| SPDEF | hsa-miR-6756-5p  |
| SPDEF | hsa-miR-6754-5p  |

|       |                 |
|-------|-----------------|
| SPDEF | hsa-miR-6752-5p |
| SPDEF | hsa-miR-6751-5p |
| SPDEF | hsa-miR-6749-3p |
| SPDEF | hsa-miR-6722-3p |
| SPDEF | hsa-miR-618     |
| SPDEF | hsa-miR-6127    |
| SPDEF | hsa-miR-612     |
| SPDEF | hsa-miR-589-5p  |
| SPDEF | hsa-miR-589-3p  |
| SPDEF | hsa-miR-5681b   |
| SPDEF | hsa-miR-5681a   |
| SPDEF | hsa-miR-5197-5p |
| SPDEF | hsa-miR-5196-3p |
| SPDEF | hsa-miR-5003-5p |
| SPDEF | hsa-miR-485-5p  |
| SPDEF | hsa-miR-4685-5p |
| SPDEF | hsa-miR-449c-5p |
| SPDEF | hsa-miR-4434    |
| SPDEF | hsa-miR-4279    |
| SPDEF | hsa-miR-424-5p  |
| SPDEF | hsa-miR-3934-5p |
| SPDEF | hsa-miR-380-5p  |
| SPDEF | hsa-miR-379-3p  |
| SPDEF | hsa-miR-375     |
| SPDEF | hsa-miR-3668    |
| SPDEF | hsa-miR-3658    |
| SPDEF | hsa-miR-34a-5p  |
| SPDEF | hsa-miR-33a-5p  |
| SPDEF | hsa-miR-337-3p  |
| SPDEF | hsa-miR-329-5p  |
| SPDEF | hsa-miR-324-5p  |
| SPDEF | hsa-miR-324-3p  |
| SPDEF | hsa-miR-3074-3p |
| SPDEF | hsa-miR-3065-5p |
| SPDEF | hsa-miR-299-5p  |
| SPDEF | hsa-miR-296-3p  |
| SPDEF | hsa-miR-26b-5p  |
| SPDEF | hsa-miR-26a-5p  |
| SPDEF | hsa-miR-24-3p   |
| SPDEF | hsa-miR-22-3p   |



|       |                  |
|-------|------------------|
| SPDEF | hsa-miR-203a-3p  |
| SPDEF | hsa-miR-199a-5p  |
| SPDEF | hsa-miR-199a-3p  |
| SPDEF | hsa-miR-195-5p   |
| SPDEF | hsa-miR-193b-3p  |
| SPDEF | hsa-miR-187-3p   |
| SPDEF | hsa-miR-181c-5p  |
| SPDEF | hsa-miR-149-5p   |
| SPDEF | hsa-miR-149-3p   |
| SPDEF | hsa-miR-146b-5p  |
| SPDEF | hsa-miR-145-5p   |
| SPDEF | hsa-miR-144-3p   |
| SPDEF | hsa-miR-138-5p   |
| SPDEF | hsa-miR-138-2-3p |
| SPDEF | hsa-miR-125a-5p  |
| SPDEF | hsa-miR-1249-5p  |
| SPDEF | hsa-miR-124-3p   |
| SPDEF | hsa-miR-1234-3p  |
| SPDEF | hsa-miR-1207-5p  |
| SPDEF | hsa-miR-10b-5p   |
| SPDEF | hsa-miR-1-3p     |
| SPDEF | hsa-let-7e-5p    |
| SPI1  | HIF1A            |
| SPI1  | IL17A            |
| SPI1  | IL2              |
| SPI1  | NFKB1            |
| SPI1  | PTGS2            |
| SPI1  | SMAD3            |
| SPI1  | STAT3            |
| SPI1  | TGFB1            |
| SPI1  | TLR4             |
| SPI1  | TNF              |
| SPI1  | TP53             |
| SPI1  | hsa-let-7a-5p    |
| SPI1  | hsa-let-7i-5p    |
| SPI1  | hsa-miR-1-3p     |
| SPI1  | hsa-miR-1181     |
| SPI1  | hsa-miR-1207-5p  |
| SPI1  | hsa-miR-124-3p   |
| SPI1  | hsa-miR-1296-3p  |

|      |                  |
|------|------------------|
| SPI1 | hsa-miR-132-3p   |
| SPI1 | hsa-miR-139-5p   |
| SPI1 | hsa-miR-142-3p   |
| SPI1 | hsa-miR-143-3p   |
| SPI1 | hsa-miR-145-5p   |
| SPI1 | hsa-miR-146a-5p  |
| SPI1 | hsa-miR-214-3p   |
| SPI1 | hsa-miR-223-3p   |
| SPI1 | hsa-miR-24-3p    |
| SPI1 | hsa-miR-27a-3p   |
| SPI1 | hsa-miR-3160-3p  |
| SPI1 | hsa-miR-320a     |
| SPI1 | hsa-miR-4434     |
| SPI1 | hsa-miR-4651     |
| SPI1 | hsa-miR-4659a-3p |
| SPI1 | hsa-miR-4659b-3p |
| SPI1 | hsa-miR-4736     |
| SPI1 | hsa-miR-4738-3p  |
| SPI1 | hsa-miR-4748     |
| SPI1 | hsa-miR-484      |
| SPI1 | hsa-miR-5193     |
| SPI1 | hsa-miR-5702     |
| SPI1 | hsa-miR-589-3p   |
| SPI1 | hsa-miR-589-5p   |
| SPI1 | hsa-miR-663a     |
| SPI1 | hsa-miR-9-5p     |
| SPI1 | hsa-miR-942-5p   |
| SPI1 | hsa-miR-7-5p     |
| SPI1 | hsa-miR-6833-3p  |
| SPI1 | hsa-miR-6815-3p  |
| SPI1 | hsa-miR-6760-5p  |
| SPI1 | hsa-miR-618      |
| SPI1 | hsa-miR-5703     |
| SPI1 | hsa-miR-4795-5p  |
| SPI1 | hsa-miR-4778-3p  |
| SPI1 | hsa-miR-4698     |
| SPI1 | hsa-miR-4531     |
| SPI1 | hsa-miR-4487     |
| SPI1 | hsa-miR-4470     |
| SPI1 | hsa-miR-4282     |

|        |                  |
|--------|------------------|
| SPI1   | hsa-miR-3662     |
| SPI1   | hsa-miR-3199     |
| SPI1   | hsa-miR-26a-5p   |
| SPI1   | hsa-miR-2682-5p  |
| SPI1   | hsa-miR-16-5p    |
| SPI1   | hsa-miR-15b-5p   |
| SPI1   | hsa-miR-155-5p   |
| SPI1   | hsa-miR-150-5p   |
| SPI1   | hsa-miR-138-5p   |
| SPI1   | hsa-miR-138-2-3p |
| SPI1   | hsa-miR-137      |
| SPI1   | hsa-miR-128-3p   |
| SPI1   | hsa-miR-1273f    |
| SPI1   | hsa-miR-101-3p   |
| SPIB   | IL10             |
| SPIB   | NFKB1            |
| SPIB   | TLR4             |
| SPIB   | TP53             |
| SPIB   | hsa-miR-92a-3p   |
| SPIB   | hsa-miR-92a-1-5p |
| SPIB   | hsa-miR-625-3p   |
| SPIB   | hsa-miR-5693     |
| SPIB   | hsa-miR-4725-3p  |
| SPIB   | hsa-miR-4698     |
| SPIB   | hsa-miR-365b-5p  |
| SPIB   | hsa-miR-19b-3p   |
| SPIB   | hsa-miR-1207-5p  |
| SPIB   | hsa-let-7a-5p    |
| SREBF1 | HIF1A            |
| SREBF1 | PTGS2            |
| SREBF1 | STAT3            |
| SREBF1 | TP53             |
| SREBF1 | hsa-miR-1908-5p  |
| SREBF1 | hsa-miR-210-3p   |
| SREBF1 | hsa-miR-4651     |
| SREBF1 | hsa-miR-4738-3p  |
| SREBF1 | hsa-miR-7-5p     |
| SREBF1 | hsa-miR-92b-3p   |
| SREBF1 | hsa-miR-4659b-3p |
| SREBF1 | hsa-miR-4659a-3p |

|     |                  |
|-----|------------------|
| SRF | PTGS2            |
| SRF | STAT3            |
| SRF | TP53             |
| SRF | HIF1A            |
| SRF | IL6              |
| SRF | NFKB1            |
| SRF | TGFB1            |
| SRF | TNF              |
| SRF | SMAD3            |
| SRF | hsa-let-7a-5p    |
| SRF | hsa-miR-1181     |
| SRF | hsa-miR-153-5p   |
| SRF | hsa-miR-223-3p   |
| SRF | hsa-miR-4736     |
| SRF | hsa-miR-4738-3p  |
| SRF | hsa-miR-484      |
| SRF | hsa-miR-663a     |
| SRF | hsa-miR-942-5p   |
| SRF | hsa-miR-935      |
| SRF | hsa-miR-92b-3p   |
| SRF | hsa-miR-9-5p     |
| SRF | hsa-miR-8085     |
| SRF | hsa-miR-7110-5p  |
| SRF | hsa-miR-7110-3p  |
| SRF | hsa-miR-7-5p     |
| SRF | hsa-miR-6882-5p  |
| SRF | hsa-miR-6875-3p  |
| SRF | hsa-miR-6872-3p  |
| SRF | hsa-miR-6845-3p  |
| SRF | hsa-miR-6825-5p  |
| SRF | hsa-miR-6815-3p  |
| SRF | hsa-miR-6809-3p  |
| SRF | hsa-miR-6808-5p  |
| SRF | hsa-miR-6789-3p  |
| SRF | hsa-miR-6760-5p  |
| SRF | hsa-miR-6751-5p  |
| SRF | hsa-miR-6511a-5p |
| SRF | hsa-miR-589-5p   |
| SRF | hsa-miR-589-3p   |
| SRF | hsa-miR-5703     |

|     |                 |
|-----|-----------------|
| SRF | hsa-miR-4763-3p |
| SRF | hsa-miR-4697-3p |
| SRF | hsa-miR-4651    |
| SRF | hsa-miR-4650-5p |
| SRF | hsa-miR-4531    |
| SRF | hsa-miR-449c-5p |
| SRF | hsa-miR-4487    |
| SRF | hsa-miR-4470    |
| SRF | hsa-miR-375     |
| SRF | hsa-miR-3662    |
| SRF | hsa-miR-365a-5p |
| SRF | hsa-miR-365a-3p |
| SRF | hsa-miR-3529-3p |
| SRF | hsa-miR-34b-5p  |
| SRF | hsa-miR-320a    |
| SRF | hsa-miR-3199    |
| SRF | hsa-miR-3121-3p |
| SRF | hsa-miR-27a-3p  |
| SRF | hsa-miR-24-3p   |
| SRF | hsa-miR-22-3p   |
| SRF | hsa-miR-2110    |
| SRF | hsa-miR-211-5p  |
| SRF | hsa-miR-210-3p  |
| SRF | hsa-miR-203a-3p |
| SRF | hsa-miR-199a-5p |
| SRF | hsa-miR-199a-3p |
| SRF | hsa-miR-194-3p  |
| SRF | hsa-miR-193b-3p |
| SRF | hsa-miR-1908-5p |
| SRF | hsa-miR-149-5p  |
| SRF | hsa-miR-149-3p  |
| SRF | hsa-miR-145-5p  |
| SRF | hsa-miR-144-3p  |
| SRF | hsa-miR-143-3p  |
| SRF | hsa-miR-138-5p  |
| SRF | hsa-miR-1322    |
| SRF | hsa-miR-132-3p  |
| SRF | hsa-miR-130a-3p |
| SRF | hsa-miR-128-3p  |
| SRF | hsa-miR-124-3p  |

|       |                 |
|-------|-----------------|
| SRF   | hsa-miR-1-3p    |
| SRF   | hsa-let-7i-5p   |
| SRF   | hsa-let-7b-5p   |
| STAT1 | HIF1A           |
| STAT1 | IL17A           |
| STAT1 | IL6             |
| STAT1 | NFKB1           |
| STAT1 | PTGS2           |
| STAT1 | STAT3           |
| STAT1 | TGFB1           |
| STAT1 | TLR4            |
| STAT1 | TNF             |
| STAT1 | TP53            |
| STAT1 | hsa-miR-17-5p   |
| STAT1 | hsa-miR-18a-3p  |
| STAT1 | hsa-miR-18a-5p  |
| STAT1 | hsa-miR-1908-5p |
| STAT1 | hsa-miR-19a-3p  |
| STAT1 | hsa-miR-20a-5p  |
| STAT1 | hsa-miR-34a-5p  |
| STAT1 | hsa-miR-4470    |
| STAT1 | hsa-miR-4651    |
| STAT1 | hsa-miR-663a    |
| STAT1 | hsa-miR-92b-3p  |
| STAT1 | hsa-miR-942-5p  |
| STAT1 | hsa-miR-9-5p    |
| STAT1 | hsa-miR-7110-5p |
| STAT1 | hsa-miR-7110-3p |
| STAT1 | hsa-miR-7-5p    |
| STAT1 | hsa-miR-6872-3p |
| STAT1 | hsa-miR-6825-5p |
| STAT1 | hsa-miR-6815-3p |
| STAT1 | hsa-miR-612     |
| STAT1 | hsa-miR-589-5p  |
| STAT1 | hsa-miR-589-3p  |
| STAT1 | hsa-miR-5703    |
| STAT1 | hsa-miR-5197-5p |
| STAT1 | hsa-miR-5193    |
| STAT1 | hsa-miR-484     |
| STAT1 | hsa-miR-4795-5p |

|       |                 |
|-------|-----------------|
| STAT1 | hsa-miR-4736    |
| STAT1 | hsa-miR-4720-3p |
| STAT1 | hsa-miR-4531    |
| STAT1 | hsa-miR-449c-5p |
| STAT1 | hsa-miR-4487    |
| STAT1 | hsa-miR-4434    |
| STAT1 | hsa-miR-4279    |
| STAT1 | hsa-miR-365a-5p |
| STAT1 | hsa-miR-365a-3p |
| STAT1 | hsa-miR-3199    |
| STAT1 | hsa-miR-30e-5p  |
| STAT1 | hsa-miR-30c-5p  |
| STAT1 | hsa-miR-30a-5p  |
| STAT1 | hsa-miR-27a-3p  |
| STAT1 | hsa-miR-24-3p   |
| STAT1 | hsa-miR-22-3p   |
| STAT1 | hsa-miR-2110    |
| STAT1 | hsa-miR-210-3p  |
| STAT1 | hsa-miR-21-5p   |
| STAT1 | hsa-miR-194-3p  |
| STAT1 | hsa-miR-193b-3p |
| STAT1 | hsa-miR-181c-5p |
| STAT1 | hsa-miR-155-5p  |
| STAT1 | hsa-miR-146a-5p |
| STAT1 | hsa-miR-138-5p  |
| STAT1 | hsa-miR-1322    |
| STAT1 | hsa-miR-132-3p  |
| STAT1 | hsa-miR-130a-3p |
| STAT1 | hsa-miR-128-3p  |
| STAT1 | hsa-miR-124-3p  |
| STAT1 | hsa-miR-1207-5p |
| STAT1 | hsa-miR-1181    |
| STAT2 | STAT3           |
| STAT2 | TP53            |
| STAT2 | hsa-miR-17-5p   |
| STAT2 | hsa-miR-18a-3p  |
| STAT2 | hsa-miR-18a-5p  |
| STAT2 | hsa-miR-19a-3p  |
| STAT2 | hsa-miR-20a-5p  |
| STAT2 | hsa-miR-4738-3p |

|       |                  |
|-------|------------------|
| STAT2 | hsa-miR-92b-3p   |
| STAT2 | hsa-miR-93-5p    |
| STAT2 | hsa-miR-589-5p   |
| STAT2 | hsa-miR-589-3p   |
| STAT2 | hsa-miR-4659b-3p |
| STAT2 | hsa-miR-4659a-3p |
| STAT2 | hsa-miR-25-3p    |
| STAT2 | hsa-miR-150-5p   |
| STAT2 | hsa-miR-106b-5p  |
| STAT2 | hsa-miR-106b-3p  |
| STAT3 | HIF1A            |
| STAT3 | IL10             |
| STAT3 | NFKB1            |
| STAT3 | PTGS2            |
| STAT3 | SMAD3            |
| STAT3 | FOXP3            |
| STAT3 | TNF              |
| STAT3 | TP53             |
| STAT3 | IL17A            |
| STAT3 | IL6              |
| STAT3 | IL2              |
| STAT3 | TLR4             |
| STAT3 | hsa-let-7a-5p    |
| STAT3 | hsa-miR-1322     |
| STAT3 | hsa-miR-155-5p   |
| STAT3 | hsa-miR-21-5p    |
| STAT3 | hsa-miR-2110     |
| STAT3 | hsa-miR-214-3p   |
| STAT3 | hsa-miR-30a-5p   |
| STAT3 | hsa-miR-3165     |
| STAT3 | hsa-miR-3199     |
| STAT3 | hsa-miR-320a     |
| STAT3 | hsa-miR-3662     |
| STAT3 | hsa-miR-4279     |
| STAT3 | hsa-miR-4470     |
| STAT3 | hsa-miR-4736     |
| STAT3 | hsa-miR-4738-3p  |
| STAT3 | hsa-miR-484      |
| STAT3 | hsa-miR-92b-3p   |
| STAT3 | hsa-miR-942-5p   |



|       |                  |
|-------|------------------|
| STAT3 | hsa-miR-99a-5p   |
| STAT3 | hsa-miR-935      |
| STAT3 | hsa-miR-92a-3p   |
| STAT3 | hsa-miR-92a-2-5p |
| STAT3 | hsa-miR-92a-1-5p |
| STAT3 | hsa-miR-9-5p     |
| STAT3 | hsa-miR-8052     |
| STAT3 | hsa-miR-7-5p     |
| STAT3 | hsa-miR-6833-3p  |
| STAT3 | hsa-miR-6825-5p  |
| STAT3 | hsa-miR-6762-3p  |
| STAT3 | hsa-miR-6760-5p  |
| STAT3 | hsa-miR-663a     |
| STAT3 | hsa-miR-612      |
| STAT3 | hsa-miR-605-5p   |
| STAT3 | hsa-miR-5693     |
| STAT3 | hsa-miR-558      |
| STAT3 | hsa-miR-548n     |
| STAT3 | hsa-miR-5197-5p  |
| STAT3 | hsa-miR-491-5p   |
| STAT3 | hsa-miR-4804-3p  |
| STAT3 | hsa-miR-4799-5p  |
| STAT3 | hsa-miR-4795-5p  |
| STAT3 | hsa-miR-4748     |
| STAT3 | hsa-miR-4742-3p  |
| STAT3 | hsa-miR-4698     |
| STAT3 | hsa-miR-4694-3p  |
| STAT3 | hsa-miR-4662a-5p |
| STAT3 | hsa-miR-4651     |
| STAT3 | hsa-miR-4531     |
| STAT3 | hsa-miR-449c-5p  |
| STAT3 | hsa-miR-4487     |
| STAT3 | hsa-miR-4434     |
| STAT3 | hsa-miR-4286     |
| STAT3 | hsa-miR-4282     |
| STAT3 | hsa-miR-3934-5p  |
| STAT3 | hsa-miR-375      |
| STAT3 | hsa-miR-34b-5p   |
| STAT3 | hsa-miR-31-5p    |
| STAT3 | hsa-miR-30e-5p   |

|       |                 |
|-------|-----------------|
| STAT3 | hsa-miR-30b-5p  |
| STAT3 | hsa-miR-3074-3p |
| STAT3 | hsa-miR-29b-3p  |
| STAT3 | hsa-miR-2682-5p |
| STAT3 | hsa-miR-24-3p   |
| STAT3 | hsa-miR-22-3p   |
| STAT3 | hsa-miR-211-5p  |
| STAT3 | hsa-miR-210-3p  |
| STAT3 | hsa-miR-20b-5p  |
| STAT3 | hsa-miR-20a-5p  |
| STAT3 | hsa-miR-19b-3p  |
| STAT3 | hsa-miR-19a-3p  |
| STAT3 | hsa-miR-199a-5p |
| STAT3 | hsa-miR-199a-3p |
| STAT3 | hsa-miR-193b-3p |
| STAT3 | hsa-miR-1908-5p |
| STAT3 | hsa-miR-18b-5p  |
| STAT3 | hsa-miR-18a-5p  |
| STAT3 | hsa-miR-18a-3p  |
| STAT3 | hsa-miR-185-5p  |
| STAT3 | hsa-miR-17-5p   |
| STAT3 | hsa-miR-16-5p   |
| STAT3 | hsa-miR-15b-5p  |
| STAT3 | hsa-miR-151a-3p |
| STAT3 | hsa-miR-142-3p  |
| STAT3 | hsa-miR-137     |
| STAT3 | hsa-miR-132-3p  |
| STAT3 | hsa-miR-130a-3p |
| STAT3 | hsa-miR-1296-3p |
| STAT3 | hsa-miR-1288-5p |
| STAT3 | hsa-miR-128-3p  |
| STAT3 | hsa-miR-125b-5p |
| STAT3 | hsa-miR-107     |
| STAT3 | hsa-miR-106a-5p |
| STAT3 | hsa-miR-106a-3p |
| STAT3 | hsa-miR-101-3p  |
| STAT4 | IL10            |
| STAT4 | NFKB1           |
| STAT4 | TNF             |
| STAT4 | hsa-miR-34b-5p  |

|        |                  |
|--------|------------------|
| STAT4  | hsa-miR-299-5p   |
| STAT4  | hsa-miR-210-3p   |
| STAT4  | hsa-miR-101-3p   |
| STAT5A | HIF1A            |
| STAT5A | NFKB1            |
| STAT5A | STAT3            |
| STAT5A | TGFB1            |
| STAT5A | TNF              |
| STAT5A | TP53             |
| STAT5A | hsa-miR-92a-3p   |
| STAT5A | hsa-miR-92a-1-5p |
| STAT5A | hsa-miR-9-5p     |
| STAT5A | hsa-miR-6797-5p  |
| STAT5A | hsa-miR-6760-5p  |
| STAT5A | hsa-miR-5196-3p  |
| STAT5A | hsa-miR-4487     |
| STAT5A | hsa-miR-4441     |
| STAT5A | hsa-miR-223-3p   |
| STAT5A | hsa-miR-20a-5p   |
| STAT5A | hsa-miR-19b-3p   |
| STAT5A | hsa-miR-19a-3p   |
| STAT5A | hsa-miR-1908-5p  |
| STAT5A | hsa-miR-18a-5p   |
| STAT5A | hsa-miR-18a-3p   |
| STAT5A | hsa-miR-17-5p    |
| STAT5A | hsa-miR-146a-5p  |
| STAT5A | hsa-miR-130b-3p  |
| STAT5A | hsa-miR-1273f    |
| STAT5A | hsa-miR-124-3p   |
| T      | HIF1A            |
| T      | SMAD3            |
| T      | STAT3            |
| T      | hsa-miR-7-5p     |
| T      | hsa-miR-6872-3p  |
| T      | hsa-miR-548g-3p  |
| T      | hsa-miR-484      |
| T      | hsa-miR-4778-3p  |
| T      | hsa-miR-449c-5p  |
| T      | hsa-miR-3668     |
| T      | hsa-miR-34b-5p   |

|      |                  |
|------|------------------|
| T    | hsa-miR-335-5p   |
| T    | hsa-miR-2110     |
| T    | hsa-miR-15a-5p   |
| T    | hsa-miR-124-3p   |
| T    | hsa-miR-1181     |
| TAL1 | HIF1A            |
| TAL1 | NFKB1            |
| TAL1 | TGFB1            |
| TAL1 | IL6              |
| TAL1 | PTGS2            |
| TAL1 | SMAD3            |
| TAL1 | STAT3            |
| TAL1 | TNF              |
| TAL1 | TP53             |
| TAL1 | hsa-miR-937-5p   |
| TAL1 | hsa-miR-93-5p    |
| TAL1 | hsa-miR-889-3p   |
| TAL1 | hsa-miR-6893-5p  |
| TAL1 | hsa-miR-6882-5p  |
| TAL1 | hsa-miR-6835-5p  |
| TAL1 | hsa-miR-6807-5p  |
| TAL1 | hsa-miR-6807-3p  |
| TAL1 | hsa-miR-6762-3p  |
| TAL1 | hsa-miR-663a     |
| TAL1 | hsa-miR-633      |
| TAL1 | hsa-miR-625-3p   |
| TAL1 | hsa-miR-5693     |
| TAL1 | hsa-miR-5193     |
| TAL1 | hsa-miR-4763-3p  |
| TAL1 | hsa-miR-4728-5p  |
| TAL1 | hsa-miR-4659b-3p |
| TAL1 | hsa-miR-4659a-3p |
| TAL1 | hsa-miR-4651     |
| TAL1 | hsa-miR-4487     |
| TAL1 | hsa-miR-4271     |
| TAL1 | hsa-miR-3934-5p  |
| TAL1 | hsa-miR-324-5p   |
| TAL1 | hsa-miR-324-3p   |
| TAL1 | hsa-miR-320a     |
| TAL1 | hsa-miR-26a-5p   |

|      |                 |
|------|-----------------|
| TAL1 | hsa-miR-25-3p   |
| TAL1 | hsa-miR-223-3p  |
| TAL1 | hsa-miR-214-3p  |
| TAL1 | hsa-miR-21-5p   |
| TAL1 | hsa-miR-1910-3p |
| TAL1 | hsa-miR-1909-3p |
| TAL1 | hsa-miR-1908-5p |
| TAL1 | hsa-miR-151a-3p |
| TAL1 | hsa-miR-144-3p  |
| TAL1 | hsa-miR-142-3p  |
| TAL1 | hsa-miR-1207-5p |
| TAL1 | hsa-miR-106b-5p |
| TAL1 | hsa-miR-106b-3p |
| TAL1 | hsa-miR-101-3p  |
| TAL1 | hsa-let-7i-5p   |
| TAL1 | hsa-let-7b-5p   |
| TAL1 | hsa-let-7a-5p   |
| TBP  | HIF1A           |
| TBP  | IL6             |
| TBP  | NFKB1           |
| TBP  | PTGS2           |
| TBP  | SMAD3           |
| TBP  | STAT3           |
| TBP  | TGFB1           |
| TBP  | TLR4            |
| TBP  | TNF             |
| TBP  | TP53            |
| TBP  | hsa-miR-1181    |
| TBP  | hsa-miR-1322    |
| TBP  | hsa-miR-143-3p  |
| TBP  | hsa-miR-2110    |
| TBP  | hsa-miR-22-3p   |
| TBP  | hsa-miR-4470    |
| TBP  | hsa-miR-4651    |
| TBP  | hsa-miR-4736    |
| TBP  | hsa-miR-935     |
| TBP  | hsa-miR-9-5p    |
| TBP  | hsa-miR-6815-3p |
| TBP  | hsa-miR-6809-3p |
| TBP  | hsa-miR-618     |

|       |                 |
|-------|-----------------|
| TBP   | hsa-miR-4795-5p |
| TBP   | hsa-miR-4434    |
| TBP   | hsa-miR-371b-3p |
| TBP   | hsa-miR-34b-5p  |
| TBP   | hsa-miR-3199    |
| TBP   | hsa-miR-3165    |
| TBP   | hsa-miR-30a-5p  |
| TBP   | hsa-miR-199b-5p |
| TBP   | hsa-miR-193b-3p |
| TBP   | hsa-miR-155-5p  |
| TBP   | hsa-miR-149-5p  |
| TBP   | hsa-miR-149-3p  |
| TBP   | hsa-miR-1468-3p |
| TBP   | hsa-miR-145-5p  |
| TBP   | hsa-miR-130b-3p |
| TBP   | hsa-miR-130a-3p |
| TBP   | hsa-miR-1273f   |
| TBP   | hsa-miR-125b-5p |
| TBP   | hsa-miR-124-3p  |
| TCF12 | HIF1A           |
| TCF12 | NFKB1           |
| TCF12 | PTGS2           |
| TCF12 | SMAD3           |
| TCF12 | STAT3           |
| TCF12 | TGFB1           |
| TCF12 | TNF             |
| TCF12 | TP53            |
| TCF12 | IL6             |
| TCF12 | hsa-miR-1181    |
| TCF12 | hsa-miR-1207-5p |
| TCF12 | hsa-miR-128-3p  |
| TCF12 | hsa-miR-1288-5p |
| TCF12 | hsa-miR-155-5p  |
| TCF12 | hsa-miR-21-5p   |
| TCF12 | hsa-miR-22-3p   |
| TCF12 | hsa-miR-24-3p   |
| TCF12 | hsa-miR-27a-3p  |
| TCF12 | hsa-miR-30a-5p  |
| TCF12 | hsa-miR-3165    |
| TCF12 | hsa-miR-3668    |

|       |                  |
|-------|------------------|
| TCF12 | hsa-miR-4279     |
| TCF12 | hsa-miR-4282     |
| TCF12 | hsa-miR-4470     |
| TCF12 | hsa-miR-4651     |
| TCF12 | hsa-miR-4697-3p  |
| TCF12 | hsa-miR-4738-3p  |
| TCF12 | hsa-miR-605-5p   |
| TCF12 | hsa-miR-663a     |
| TCF12 | hsa-miR-942-5p   |
| TCF12 | hsa-miR-93-5p    |
| TCF12 | hsa-miR-92b-3p   |
| TCF12 | hsa-miR-9-5p     |
| TCF12 | hsa-miR-8085     |
| TCF12 | hsa-miR-6875-3p  |
| TCF12 | hsa-miR-6872-3p  |
| TCF12 | hsa-miR-6825-5p  |
| TCF12 | hsa-miR-6809-3p  |
| TCF12 | hsa-miR-6789-3p  |
| TCF12 | hsa-miR-6760-5p  |
| TCF12 | hsa-miR-6511a-5p |
| TCF12 | hsa-miR-612      |
| TCF12 | hsa-miR-589-5p   |
| TCF12 | hsa-miR-589-3p   |
| TCF12 | hsa-miR-5703     |
| TCF12 | hsa-miR-484      |
| TCF12 | hsa-miR-4799-5p  |
| TCF12 | hsa-miR-4795-5p  |
| TCF12 | hsa-miR-4531     |
| TCF12 | hsa-miR-4516     |
| TCF12 | hsa-miR-449c-5p  |
| TCF12 | hsa-miR-3934-5p  |
| TCF12 | hsa-miR-375      |
| TCF12 | hsa-miR-365a-5p  |
| TCF12 | hsa-miR-365a-3p  |
| TCF12 | hsa-miR-324-5p   |
| TCF12 | hsa-miR-324-3p   |
| TCF12 | hsa-miR-320a     |
| TCF12 | hsa-miR-3199     |
| TCF12 | hsa-miR-3074-3p  |
| TCF12 | hsa-miR-2682-5p  |

|       |                 |
|-------|-----------------|
| TCF12 | hsa-miR-25-3p   |
| TCF12 | hsa-miR-2110    |
| TCF12 | hsa-miR-203a-3p |
| TCF12 | hsa-miR-199a-5p |
| TCF12 | hsa-miR-199a-3p |
| TCF12 | hsa-miR-194-3p  |
| TCF12 | hsa-miR-193b-3p |
| TCF12 | hsa-miR-1908-5p |
| TCF12 | hsa-miR-150-5p  |
| TCF12 | hsa-miR-149-5p  |
| TCF12 | hsa-miR-149-3p  |
| TCF12 | hsa-miR-146b-5p |
| TCF12 | hsa-miR-142-3p  |
| TCF12 | hsa-miR-139-5p  |
| TCF12 | hsa-miR-138-5p  |
| TCF12 | hsa-miR-137     |
| TCF12 | hsa-miR-132-3p  |
| TCF12 | hsa-miR-130b-3p |
| TCF12 | hsa-miR-124-3p  |
| TCF12 | hsa-miR-106b-5p |
| TCF12 | hsa-miR-106b-3p |
| TCF12 | hsa-let-7i-5p   |
| TCF12 | hsa-let-7a-5p   |
| TCF21 | HIF1A           |
| TCF21 | NFKB1           |
| TCF21 | PTGS2           |
| TCF21 | hsa-miR-100-5p  |
| TCF21 | hsa-miR-155-5p  |
| TCF21 | hsa-miR-199b-5p |
| TCF21 | hsa-miR-22-3p   |
| TCF21 | hsa-miR-34a-5p  |
| TCF21 | hsa-miR-7-5p    |
| TCF3  | HIF1A           |
| TCF3  | NFKB1           |
| TCF3  | STAT3           |
| TCF3  | TGFB1           |
| TCF3  | TNF             |
| TCF3  | TP53            |
| TCF3  | hsa-miR-1181    |
| TCF3  | hsa-miR-155-5p  |



|      |                  |
|------|------------------|
| TCF3 | hsa-miR-4736     |
| TCF3 | hsa-miR-6875-3p  |
| TCF3 | hsa-miR-6815-3p  |
| TCF3 | hsa-miR-6789-3p  |
| TCF3 | hsa-miR-6511a-5p |
| TCF3 | hsa-miR-589-5p   |
| TCF3 | hsa-miR-589-3p   |
| TCF3 | hsa-miR-5692a    |
| TCF3 | hsa-miR-4531     |
| TCF3 | hsa-miR-4516     |
| TCF3 | hsa-miR-4487     |
| TCF3 | hsa-miR-4418     |
| TCF3 | hsa-miR-375      |
| TCF3 | hsa-miR-3662     |
| TCF3 | hsa-miR-365a-5p  |
| TCF3 | hsa-miR-365a-3p  |
| TCF3 | hsa-miR-320a     |
| TCF3 | hsa-miR-21-5p    |
| TCF3 | hsa-miR-142-3p   |
| TCF3 | hsa-miR-128-3p   |
| TCF3 | hsa-miR-124-3p   |
| TCF3 | hsa-miR-107      |
| TCF4 | HIF1A            |
| TCF4 | SMAD3            |
| TCF4 | STAT3            |
| TCF4 | TGFB1            |
| TCF4 | TP53             |
| TCF4 | hsa-miR-9-5p     |
| TCF4 | hsa-miR-7150     |
| TCF4 | hsa-miR-7-5p     |
| TCF4 | hsa-miR-6809-3p  |
| TCF4 | hsa-miR-6785-5p  |
| TCF4 | hsa-miR-6760-5p  |
| TCF4 | hsa-miR-548n     |
| TCF4 | hsa-miR-504-5p   |
| TCF4 | hsa-miR-4799-5p  |
| TCF4 | hsa-miR-4748     |
| TCF4 | hsa-miR-335-5p   |
| TCF4 | hsa-miR-324-5p   |
| TCF4 | hsa-miR-324-3p   |

|        |                 |
|--------|-----------------|
| TCF4   | hsa-miR-3165    |
| TCF4   | hsa-miR-30c-5p  |
| TCF4   | hsa-miR-30a-5p  |
| TCF4   | hsa-miR-3074-3p |
| TCF4   | hsa-miR-24-3p   |
| TCF4   | hsa-miR-222-3p  |
| TCF4   | hsa-miR-221-3p  |
| TCF4   | hsa-miR-22-3p   |
| TCF4   | hsa-miR-203a-3p |
| TCF4   | hsa-miR-199b-5p |
| TCF4   | hsa-miR-146b-5p |
| TCF4   | hsa-miR-124-3p  |
| TCF7L2 | HIF1A           |
| TCF7L2 | NFKB1           |
| TCF7L2 | SMAD3           |
| TCF7L2 | STAT3           |
| TCF7L2 | TGFB1           |
| TCF7L2 | TP53            |
| TCF7L2 | PTGS2           |
| TCF7L2 | hsa-let-7i-5p   |
| TCF7L2 | hsa-miR-100-5p  |
| TCF7L2 | hsa-miR-1908-5p |
| TCF7L2 | hsa-miR-193b-3p |
| TCF7L2 | hsa-miR-2110    |
| TCF7L2 | hsa-miR-30a-5p  |
| TCF7L2 | hsa-miR-3165    |
| TCF7L2 | hsa-miR-4434    |
| TCF7L2 | hsa-miR-4738-3p |
| TCF7L2 | hsa-miR-4799-5p |
| TCF7L2 | hsa-miR-504-5p  |
| TCF7L2 | hsa-miR-663a    |
| TCF7L2 | hsa-miR-9-5p    |
| TCF7L2 | hsa-miR-92b-3p  |
| TCF7L2 | hsa-miR-935     |
| TCF7L2 | hsa-miR-6789-3p |
| TCF7L2 | hsa-miR-6760-5p |
| TCF7L2 | hsa-miR-5702    |
| TCF7L2 | hsa-miR-484     |
| TCF7L2 | hsa-miR-4804-3p |
| TCF7L2 | hsa-miR-4795-5p |

|        |                 |
|--------|-----------------|
| TCF7L2 | hsa-miR-4651    |
| TCF7L2 | hsa-miR-4470    |
| TCF7L2 | hsa-miR-365a-5p |
| TCF7L2 | hsa-miR-365a-3p |
| TCF7L2 | hsa-miR-320a    |
| TCF7L2 | hsa-miR-27a-3p  |
| TCF7L2 | hsa-miR-24-3p   |
| TCF7L2 | hsa-miR-211-5p  |
| TCF7L2 | hsa-miR-210-3p  |
| TCF7L2 | hsa-miR-145-5p  |
| TCF7L2 | hsa-miR-128-3p  |
| TCF7L2 | hsa-let-7a-5p   |
| TEAD1  | NFKB1           |
| TEAD1  | hsa-miR-3074-3p |
| TEAD1  | hsa-miR-24-3p   |
| TEAD2  | HIF1A           |
| TEAD2  | PTGS2           |
| TEAD2  | SMAD3           |
| TEAD2  | TP53            |
| TEAD2  | hsa-miR-935     |
| TEAD2  | hsa-miR-7113-5p |
| TEAD2  | hsa-miR-375     |
| TEAD2  | hsa-let-7a-5p   |
| TEAD4  | IL10            |
| TEAD4  | IL17A           |
| TEAD4  | IL6             |
| TEAD4  | NFKB1           |
| TEAD4  | PTGS2           |
| TEAD4  | SMAD3           |
| TEAD4  | STAT3           |
| TEAD4  | TGFB1           |
| TEAD4  | TP53            |
| TEAD4  | HIF1A           |
| TEAD4  | hsa-let-7i-5p   |
| TEAD4  | hsa-miR-128-3p  |
| TEAD4  | hsa-miR-130b-3p |
| TEAD4  | hsa-miR-138-5p  |
| TEAD4  | hsa-miR-155-5p  |
| TEAD4  | hsa-miR-1908-5p |
| TEAD4  | hsa-miR-21-5p   |

|       |                  |
|-------|------------------|
| TEAD4 | hsa-miR-22-3p    |
| TEAD4 | hsa-miR-30a-5p   |
| TEAD4 | hsa-miR-320a     |
| TEAD4 | hsa-miR-3668     |
| TEAD4 | hsa-miR-4279     |
| TEAD4 | hsa-miR-4470     |
| TEAD4 | hsa-miR-4651     |
| TEAD4 | hsa-miR-4698     |
| TEAD4 | hsa-miR-4738-3p  |
| TEAD4 | hsa-miR-484      |
| TEAD4 | hsa-miR-612      |
| TEAD4 | hsa-miR-663a     |
| TEAD4 | hsa-miR-942-5p   |
| TEAD4 | hsa-miR-92b-3p   |
| TEAD4 | hsa-miR-92a-3p   |
| TEAD4 | hsa-miR-92a-2-5p |
| TEAD4 | hsa-miR-922      |
| TEAD4 | hsa-miR-9-5p     |
| TEAD4 | hsa-miR-874-3p   |
| TEAD4 | hsa-miR-8085     |
| TEAD4 | hsa-miR-8052     |
| TEAD4 | hsa-miR-744-5p   |
| TEAD4 | hsa-miR-7151-3p  |
| TEAD4 | hsa-miR-7150     |
| TEAD4 | hsa-miR-7-5p     |
| TEAD4 | hsa-miR-6893-5p  |
| TEAD4 | hsa-miR-6882-5p  |
| TEAD4 | hsa-miR-6880-5p  |
| TEAD4 | hsa-miR-6875-3p  |
| TEAD4 | hsa-miR-6837-5p  |
| TEAD4 | hsa-miR-6835-5p  |
| TEAD4 | hsa-miR-6833-3p  |
| TEAD4 | hsa-miR-6815-3p  |
| TEAD4 | hsa-miR-6797-5p  |
| TEAD4 | hsa-miR-6789-3p  |
| TEAD4 | hsa-miR-6760-5p  |
| TEAD4 | hsa-miR-6756-5p  |
| TEAD4 | hsa-miR-6755-5p  |
| TEAD4 | hsa-miR-652-3p   |
| TEAD4 | hsa-miR-633      |

|       |                  |
|-------|------------------|
| TEAD4 | hsa-miR-630      |
| TEAD4 | hsa-miR-618      |
| TEAD4 | hsa-miR-6133     |
| TEAD4 | hsa-miR-6129     |
| TEAD4 | hsa-miR-608      |
| TEAD4 | hsa-miR-605-5p   |
| TEAD4 | hsa-miR-589-5p   |
| TEAD4 | hsa-miR-589-3p   |
| TEAD4 | hsa-miR-5703     |
| TEAD4 | hsa-miR-5693     |
| TEAD4 | hsa-miR-5681b    |
| TEAD4 | hsa-miR-5681a    |
| TEAD4 | hsa-miR-519d-3p  |
| TEAD4 | hsa-miR-5196-3p  |
| TEAD4 | hsa-miR-5193     |
| TEAD4 | hsa-miR-513b-3p  |
| TEAD4 | hsa-miR-500b-3p  |
| TEAD4 | hsa-miR-5003-5p  |
| TEAD4 | hsa-miR-4778-3p  |
| TEAD4 | hsa-miR-4768-5p  |
| TEAD4 | hsa-miR-4736     |
| TEAD4 | hsa-miR-4728-5p  |
| TEAD4 | hsa-miR-4725-3p  |
| TEAD4 | hsa-miR-4720-3p  |
| TEAD4 | hsa-miR-4697-3p  |
| TEAD4 | hsa-miR-4662a-5p |
| TEAD4 | hsa-miR-4659b-3p |
| TEAD4 | hsa-miR-4659a-3p |
| TEAD4 | hsa-miR-4644     |
| TEAD4 | hsa-miR-4531     |
| TEAD4 | hsa-miR-4510     |
| TEAD4 | hsa-miR-449c-5p  |
| TEAD4 | hsa-miR-4487     |
| TEAD4 | hsa-miR-4463     |
| TEAD4 | hsa-miR-4441     |
| TEAD4 | hsa-miR-4438     |
| TEAD4 | hsa-miR-4286     |
| TEAD4 | hsa-miR-4282     |
| TEAD4 | hsa-miR-4270     |
| TEAD4 | hsa-miR-424-5p   |

|       |                 |
|-------|-----------------|
| TEAD4 | hsa-miR-375     |
| TEAD4 | hsa-miR-371b-3p |
| TEAD4 | hsa-miR-365b-5p |
| TEAD4 | hsa-miR-365a-5p |
| TEAD4 | hsa-miR-365a-3p |
| TEAD4 | hsa-miR-3658    |
| TEAD4 | hsa-miR-3529-3p |
| TEAD4 | hsa-miR-34b-5p  |
| TEAD4 | hsa-miR-335-5p  |
| TEAD4 | hsa-miR-329-5p  |
| TEAD4 | hsa-miR-3165    |
| TEAD4 | hsa-miR-3160-3p |
| TEAD4 | hsa-miR-3128    |
| TEAD4 | hsa-miR-3121-3p |
| TEAD4 | hsa-miR-31-5p   |
| TEAD4 | hsa-miR-26a-5p  |
| TEAD4 | hsa-miR-2682-5p |
| TEAD4 | hsa-miR-223-3p  |
| TEAD4 | hsa-miR-222-3p  |
| TEAD4 | hsa-miR-221-3p  |
| TEAD4 | hsa-miR-2110    |
| TEAD4 | hsa-miR-203a-3p |
| TEAD4 | hsa-miR-19a-3p  |
| TEAD4 | hsa-miR-199a-5p |
| TEAD4 | hsa-miR-199a-3p |
| TEAD4 | hsa-miR-1972    |
| TEAD4 | hsa-miR-1910-3p |
| TEAD4 | hsa-miR-18a-5p  |
| TEAD4 | hsa-miR-18a-3p  |
| TEAD4 | hsa-miR-187-3p  |
| TEAD4 | hsa-miR-181c-5p |
| TEAD4 | hsa-miR-181a-5p |
| TEAD4 | hsa-miR-17-5p   |
| TEAD4 | hsa-miR-149-5p  |
| TEAD4 | hsa-miR-149-3p  |
| TEAD4 | hsa-miR-146b-5p |
| TEAD4 | hsa-miR-146a-5p |
| TEAD4 | hsa-miR-1468-3p |
| TEAD4 | hsa-miR-145-5p  |
| TEAD4 | hsa-miR-142-3p  |

|        |                 |
|--------|-----------------|
| TEAD4  | hsa-miR-139-5p  |
| TEAD4  | hsa-miR-137     |
| TEAD4  | hsa-miR-132-3p  |
| TEAD4  | hsa-miR-130a-3p |
| TEAD4  | hsa-miR-1296-3p |
| TEAD4  | hsa-miR-1288-5p |
| TEAD4  | hsa-miR-1249-5p |
| TEAD4  | hsa-miR-124-3p  |
| TEAD4  | hsa-miR-1234-3p |
| TEAD4  | hsa-miR-1207-5p |
| TEAD4  | hsa-miR-1178-3p |
| TEAD4  | hsa-miR-10b-5p  |
| TEAD4  | hsa-miR-107     |
| TEAD4  | hsa-miR-101-3p  |
| TEAD4  | hsa-miR-1-3p    |
| TEAD4  | hsa-let-7a-5p   |
| TFAM   | SMAD3           |
| TFAP2A | NFKB1           |
| TFAP2A | PTGS2           |
| TFAP2A | TGFB1           |
| TFAP2A | TP53            |
| TFAP2A | hsa-miR-181c-5p |
| TFAP2A | hsa-miR-1908-5p |
| TFAP2A | hsa-miR-21-5p   |
| TFAP2A | hsa-miR-22-3p   |
| TFAP2A | hsa-miR-24-3p   |
| TFAP2A | hsa-miR-27a-3p  |
| TFAP2A | hsa-miR-3199    |
| TFAP2A | hsa-miR-4434    |
| TFAP2A | hsa-miR-92b-3p  |
| TFAP2A | hsa-miR-194-3p  |
| TFAP2C | HIF1A           |
| TFAP2C | NFKB1           |
| TFAP2C | PTGS2           |
| TFAP2C | STAT3           |
| TFAP2C | TGFB1           |
| TFAP2C | hsa-let-7i-5p   |
| TFAP2C | hsa-miR-181c-5p |
| TFAP2C | hsa-miR-24-3p   |
| TFAP2C | hsa-miR-27a-3p  |

|        |                 |
|--------|-----------------|
| TFAP2C | hsa-miR-4470    |
| TFAP2C | hsa-miR-937-5p  |
| TFAP2C | hsa-miR-8071    |
| TFAP2C | hsa-miR-6882-5p |
| TFAP2C | hsa-miR-6825-5p |
| TFAP2C | hsa-miR-5703    |
| TFAP2C | hsa-miR-365a-5p |
| TFAP2C | hsa-miR-365a-3p |
| TFAP2C | hsa-miR-324-5p  |
| TFAP2C | hsa-miR-324-3p  |
| TFAP2C | hsa-miR-211-5p  |
| TFAP2C | hsa-miR-203a-3p |
| TFAP2C | hsa-miR-149-5p  |
| TFAP2C | hsa-miR-149-3p  |
| TFAP2C | hsa-miR-124-3p  |
| TFAP4  | HIF1A           |
| TFAP4  | NFKB1           |
| TFAP4  | STAT3           |
| TFDP1  | HIF1A           |
| TFDP1  | TGFB1           |
| TFDP1  | TP53            |
| TFE3   | SMAD3           |
| TFE3   | hsa-miR-130a-3p |
| TFE3   | hsa-miR-1181    |
| TFEB   | STAT3           |
| THAP1  | TP53            |
| THAP1  | hsa-miR-210-3p  |
| THAP1  | hsa-miR-320a    |
| THAP1  | hsa-miR-663a    |
| THAP1  | hsa-miR-6815-3p |
| THAP1  | hsa-miR-4795-5p |
| THAP1  | hsa-miR-130b-3p |
| THAP1  | hsa-miR-124-3p  |
| THAP1  | hsa-miR-1207-5p |
| THAP11 | HIF1A           |
| THAP11 | SMAD3           |
| THAP11 | STAT3           |
| THAP11 | TP53            |
| TP53   | HIF1A           |
| TP53   | NFKB1           |



|      |                 |
|------|-----------------|
| TP53 | SMAD3           |
| TP53 | STAT3           |
| TP53 | TGFB1           |
| TP53 | IL6             |
| TP53 | PTGS2           |
| TP53 | hsa-miR-185-5p  |
| TP53 | hsa-miR-21-5p   |
| TP53 | hsa-miR-217     |
| TP53 | hsa-miR-24-3p   |
| TP53 | hsa-miR-27a-3p  |
| TP53 | hsa-miR-30c-5p  |
| TP53 | hsa-miR-324-3p  |
| TP53 | hsa-miR-324-5p  |
| TP53 | hsa-miR-34a-5p  |
| TP53 | hsa-miR-7-5p    |
| TP53 | hsa-miR-874-3p  |
| TP53 | hsa-miR-937-5p  |
| TP53 | hsa-miR-93-5p   |
| TP53 | hsa-miR-877-3p  |
| TP53 | hsa-miR-8085    |
| TP53 | hsa-miR-8055    |
| TP53 | hsa-miR-744-5p  |
| TP53 | hsa-miR-7150    |
| TP53 | hsa-miR-7113-5p |
| TP53 | hsa-miR-7110-5p |
| TP53 | hsa-miR-7110-3p |
| TP53 | hsa-miR-6883-5p |
| TP53 | hsa-miR-6882-5p |
| TP53 | hsa-miR-6880-5p |
| TP53 | hsa-miR-6875-3p |
| TP53 | hsa-miR-6872-3p |
| TP53 | hsa-miR-6871-3p |
| TP53 | hsa-miR-6845-3p |
| TP53 | hsa-miR-6837-5p |
| TP53 | hsa-miR-6835-5p |
| TP53 | hsa-miR-6833-3p |
| TP53 | hsa-miR-6825-5p |
| TP53 | hsa-miR-6807-5p |
| TP53 | hsa-miR-6807-3p |
| TP53 | hsa-miR-6806-5p |

|      |                  |
|------|------------------|
| TP53 | hsa-miR-6803-5p  |
| TP53 | hsa-miR-6797-5p  |
| TP53 | hsa-miR-6789-3p  |
| TP53 | hsa-miR-6785-5p  |
| TP53 | hsa-miR-6780b-5p |
| TP53 | hsa-miR-6778-5p  |
| TP53 | hsa-miR-6766-5p  |
| TP53 | hsa-miR-6756-5p  |
| TP53 | hsa-miR-6754-5p  |
| TP53 | hsa-miR-6752-5p  |
| TP53 | hsa-miR-6751-5p  |
| TP53 | hsa-miR-6749-3p  |
| TP53 | hsa-miR-6731-5p  |
| TP53 | hsa-miR-663a     |
| TP53 | hsa-miR-660-3p   |
| TP53 | hsa-miR-633      |
| TP53 | hsa-miR-625-3p   |
| TP53 | hsa-miR-618      |
| TP53 | hsa-miR-6129     |
| TP53 | hsa-miR-6127     |
| TP53 | hsa-miR-612      |
| TP53 | hsa-miR-5703     |
| TP53 | hsa-miR-5693     |
| TP53 | hsa-miR-5581-3p  |
| TP53 | hsa-miR-548g-3p  |
| TP53 | hsa-miR-5196-3p  |
| TP53 | hsa-miR-504-5p   |
| TP53 | hsa-miR-500b-3p  |
| TP53 | hsa-miR-485-5p   |
| TP53 | hsa-miR-484      |
| TP53 | hsa-miR-4804-3p  |
| TP53 | hsa-miR-4795-5p  |
| TP53 | hsa-miR-4768-5p  |
| TP53 | hsa-miR-4763-3p  |
| TP53 | hsa-miR-4738-3p  |
| TP53 | hsa-miR-4736     |
| TP53 | hsa-miR-4728-5p  |
| TP53 | hsa-miR-4697-3p  |
| TP53 | hsa-miR-4685-5p  |
| TP53 | hsa-miR-4684-5p  |

|      |                 |
|------|-----------------|
| TP53 | hsa-miR-4651    |
| TP53 | hsa-miR-4644    |
| TP53 | hsa-miR-452-5p  |
| TP53 | hsa-miR-4510    |
| TP53 | hsa-miR-4499    |
| TP53 | hsa-miR-4487    |
| TP53 | hsa-miR-4470    |
| TP53 | hsa-miR-4434    |
| TP53 | hsa-miR-4418    |
| TP53 | hsa-miR-424-5p  |
| TP53 | hsa-miR-3934-5p |
| TP53 | hsa-miR-380-5p  |
| TP53 | hsa-miR-375     |
| TP53 | hsa-miR-371b-3p |
| TP53 | hsa-miR-365a-5p |
| TP53 | hsa-miR-365a-3p |
| TP53 | hsa-miR-33a-5p  |
| TP53 | hsa-miR-337-3p  |
| TP53 | hsa-miR-329-5p  |
| TP53 | hsa-miR-320a    |
| TP53 | hsa-miR-3199    |
| TP53 | hsa-miR-3160-3p |
| TP53 | hsa-miR-31-5p   |
| TP53 | hsa-miR-30a-5p  |
| TP53 | hsa-miR-3065-5p |
| TP53 | hsa-miR-29b-3p  |
| TP53 | hsa-miR-26b-5p  |
| TP53 | hsa-miR-26a-5p  |
| TP53 | hsa-miR-2682-5p |
| TP53 | hsa-miR-25-3p   |
| TP53 | hsa-miR-222-3p  |
| TP53 | hsa-miR-221-3p  |
| TP53 | hsa-miR-22-3p   |
| TP53 | hsa-miR-2110    |
| TP53 | hsa-miR-210-3p  |
| TP53 | hsa-miR-203a-3p |
| TP53 | hsa-miR-199b-5p |
| TP53 | hsa-miR-199a-5p |
| TP53 | hsa-miR-199a-3p |
| TP53 | hsa-miR-194-3p  |

|      |                  |
|------|------------------|
| TP53 | hsa-miR-193b-3p  |
| TP53 | hsa-miR-1909-3p  |
| TP53 | hsa-miR-1908-5p  |
| TP53 | hsa-miR-187-3p   |
| TP53 | hsa-miR-1468-3p  |
| TP53 | hsa-miR-144-3p   |
| TP53 | hsa-miR-143-3p   |
| TP53 | hsa-miR-137      |
| TP53 | hsa-miR-132-3p   |
| TP53 | hsa-miR-130b-3p  |
| TP53 | hsa-miR-130a-3p  |
| TP53 | hsa-miR-1288-5p  |
| TP53 | hsa-miR-1285-3p  |
| TP53 | hsa-miR-1273f    |
| TP53 | hsa-miR-125b-5p  |
| TP53 | hsa-miR-124-3p   |
| TP53 | hsa-miR-1249-5p  |
| TP53 | hsa-miR-1234-3p  |
| TP53 | hsa-miR-1207-5p  |
| TP53 | hsa-miR-1181     |
| TP53 | hsa-miR-106b-5p  |
| TP53 | hsa-miR-106b-3p  |
| TP53 | hsa-miR-101-3p   |
| TP53 | hsa-let-7i-5p    |
| TP53 | hsa-let-7b-5p    |
| TP53 | hsa-let-7a-5p    |
| TP63 | STAT3            |
| TP63 | TP53             |
| TP63 | HIF1A            |
| TP63 | NFKB1            |
| TP63 | PTGS2            |
| TP63 | SMAD3            |
| TP63 | TNF              |
| TP63 | hsa-let-7a-5p    |
| TP63 | hsa-miR-100-5p   |
| TP63 | hsa-miR-122-5p   |
| TP63 | hsa-miR-1322     |
| TP63 | hsa-miR-138-2-3p |
| TP63 | hsa-miR-138-5p   |
| TP63 | hsa-miR-139-5p   |

|      |                  |
|------|------------------|
| TP63 | hsa-miR-143-3p   |
| TP63 | hsa-miR-144-3p   |
| TP63 | hsa-miR-145-5p   |
| TP63 | hsa-miR-187-3p   |
| TP63 | hsa-miR-1910-3p  |
| TP63 | hsa-miR-194-3p   |
| TP63 | hsa-miR-195-5p   |
| TP63 | hsa-miR-200a-3p  |
| TP63 | hsa-miR-214-3p   |
| TP63 | hsa-miR-221-3p   |
| TP63 | hsa-miR-222-3p   |
| TP63 | hsa-miR-24-3p    |
| TP63 | hsa-miR-26b-5p   |
| TP63 | hsa-miR-3074-3p  |
| TP63 | hsa-miR-30b-5p   |
| TP63 | hsa-miR-3165     |
| TP63 | hsa-miR-3199     |
| TP63 | hsa-miR-320a     |
| TP63 | hsa-miR-34a-5p   |
| TP63 | hsa-miR-4279     |
| TP63 | hsa-miR-4290     |
| TP63 | hsa-miR-449c-5p  |
| TP63 | hsa-miR-454-3p   |
| TP63 | hsa-miR-548g-3p  |
| TP63 | hsa-miR-548n     |
| TP63 | hsa-miR-589-3p   |
| TP63 | hsa-miR-589-5p   |
| TP63 | hsa-miR-608      |
| TP63 | hsa-miR-935      |
| TP63 | hsa-miR-92b-3p   |
| TP63 | hsa-miR-6875-3p  |
| TP63 | hsa-miR-6871-3p  |
| TP63 | hsa-miR-6837-5p  |
| TP63 | hsa-miR-6825-5p  |
| TP63 | hsa-miR-6789-3p  |
| TP63 | hsa-miR-6780b-5p |
| TP63 | hsa-miR-663a     |
| TP63 | hsa-miR-6511a-5p |
| TP63 | hsa-miR-6129     |
| TP63 | hsa-miR-5703     |

|      |                  |
|------|------------------|
| TP63 | hsa-miR-484      |
| TP63 | hsa-miR-4795-5p  |
| TP63 | hsa-miR-4738-3p  |
| TP63 | hsa-miR-4651     |
| TP63 | hsa-miR-4531     |
| TP63 | hsa-miR-4487     |
| TP63 | hsa-miR-4470     |
| TP63 | hsa-miR-4441     |
| TP63 | hsa-miR-4270     |
| TP63 | hsa-miR-365a-5p  |
| TP63 | hsa-miR-365a-3p  |
| TP63 | hsa-miR-3609     |
| TP63 | hsa-miR-34b-5p   |
| TP63 | hsa-miR-324-5p   |
| TP63 | hsa-miR-324-3p   |
| TP63 | hsa-miR-22-3p    |
| TP63 | hsa-miR-2110     |
| TP63 | hsa-miR-203a-3p  |
| TP63 | hsa-miR-199a-5p  |
| TP63 | hsa-miR-199a-3p  |
| TP63 | hsa-miR-1908-5p  |
| TP63 | hsa-miR-155-5p   |
| TP63 | hsa-miR-137      |
| TP63 | hsa-miR-132-3p   |
| TP63 | hsa-miR-130a-3p  |
| TP63 | hsa-miR-1288-5p  |
| TP63 | hsa-miR-1207-5p  |
| TP63 | hsa-miR-1181     |
| TP63 | hsa-let-7i-5p    |
| TP73 | HIF1A            |
| TP73 | IL6              |
| TP73 | PTGS2            |
| TP73 | SMAD3            |
| TP73 | STAT3            |
| TP73 | TGFB1            |
| TP73 | TP53             |
| TP73 | hsa-miR-92a-3p   |
| TP73 | hsa-miR-92a-1-5p |
| TP73 | hsa-miR-5702     |
| TP73 | hsa-miR-4463     |

|      |                  |
|------|------------------|
| TP73 | hsa-miR-20a-5p   |
| TP73 | hsa-miR-19b-3p   |
| TP73 | hsa-miR-19a-3p   |
| TP73 | hsa-miR-194-3p   |
| TP73 | hsa-miR-18a-5p   |
| TP73 | hsa-miR-18a-3p   |
| TP73 | hsa-miR-181a-5p  |
| UBTF | HIF1A            |
| UBTF | IL6              |
| UBTF | NFKB1            |
| UBTF | PTGS2            |
| UBTF | SMAD3            |
| UBTF | STAT3            |
| UBTF | TGFB1            |
| UBTF | TLR4             |
| UBTF | TP53             |
| UBTF | hsa-miR-1-3p     |
| UBTF | hsa-miR-1181     |
| UBTF | hsa-miR-1322     |
| UBTF | hsa-miR-149-3p   |
| UBTF | hsa-miR-149-5p   |
| UBTF | hsa-miR-200a-3p  |
| UBTF | hsa-miR-320a     |
| UBTF | hsa-miR-4736     |
| UBTF | hsa-miR-935      |
| UBTF | hsa-miR-92b-3p   |
| UBTF | hsa-miR-9-5p     |
| UBTF | hsa-miR-6872-3p  |
| UBTF | hsa-miR-6815-3p  |
| UBTF | hsa-miR-6809-3p  |
| UBTF | hsa-miR-6511a-5p |
| UBTF | hsa-miR-622      |
| UBTF | hsa-miR-618      |
| UBTF | hsa-miR-589-5p   |
| UBTF | hsa-miR-589-3p   |
| UBTF | hsa-miR-5193     |
| UBTF | hsa-miR-5094     |
| UBTF | hsa-miR-4795-5p  |
| UBTF | hsa-miR-4659b-3p |
| UBTF | hsa-miR-4659a-3p |

|      |                 |
|------|-----------------|
| UBTF | hsa-miR-449c-5p |
| UBTF | hsa-miR-4434    |
| UBTF | hsa-miR-4270    |
| UBTF | hsa-miR-3934-5p |
| UBTF | hsa-miR-33a-5p  |
| UBTF | hsa-miR-3160-3p |
| UBTF | hsa-miR-31-5p   |
| UBTF | hsa-miR-27a-3p  |
| UBTF | hsa-miR-2682-5p |
| UBTF | hsa-miR-24-3p   |
| UBTF | hsa-miR-22-3p   |
| UBTF | hsa-miR-199b-5p |
| UBTF | hsa-miR-193b-3p |
| UBTF | hsa-miR-146b-5p |
| UBTF | hsa-miR-145-5p  |
| UBTF | hsa-miR-144-3p  |
| UBTF | hsa-miR-139-5p  |
| UBTF | hsa-miR-138-5p  |
| UBTF | hsa-miR-137     |
| UBTF | hsa-miR-132-3p  |
| UBTF | hsa-miR-130a-3p |
| UBTF | hsa-miR-1273f   |
| UBTF | hsa-miR-125b-5p |
| UBTF | hsa-miR-124-3p  |
| USF1 | HIF1A           |
| USF1 | PTGS2           |
| USF1 | STAT3           |
| USF1 | TGFB1           |
| USF1 | TP53            |
| USF1 | hsa-let-7i-5p   |
| USF1 | hsa-miR-1207-5p |
| USF1 | hsa-miR-128-3p  |
| USF1 | hsa-miR-132-3p  |
| USF1 | hsa-miR-142-3p  |
| USF1 | hsa-miR-214-3p  |
| USF1 | hsa-miR-320a    |
| USF1 | hsa-miR-4279    |
| USF1 | hsa-miR-4470    |
| USF1 | hsa-miR-4531    |
| USF1 | hsa-miR-4738-3p |



|      |                  |
|------|------------------|
| USF1 | hsa-miR-484      |
| USF1 | hsa-miR-663a     |
| USF1 | hsa-miR-92b-3p   |
| USF1 | hsa-miR-9-5p     |
| USF1 | hsa-miR-8071     |
| USF1 | hsa-miR-7-5p     |
| USF1 | hsa-miR-6875-3p  |
| USF1 | hsa-miR-6835-5p  |
| USF1 | hsa-miR-6833-3p  |
| USF1 | hsa-miR-6797-5p  |
| USF1 | hsa-miR-6789-3p  |
| USF1 | hsa-miR-6760-5p  |
| USF1 | hsa-miR-6511a-5p |
| USF1 | hsa-miR-5703     |
| USF1 | hsa-miR-5197-5p  |
| USF1 | hsa-miR-5193     |
| USF1 | hsa-miR-5003-5p  |
| USF1 | hsa-miR-4795-5p  |
| USF1 | hsa-miR-4651     |
| USF1 | hsa-miR-4516     |
| USF1 | hsa-miR-3529-3p  |
| USF1 | hsa-miR-33a-5p   |
| USF1 | hsa-miR-3121-3p  |
| USF1 | hsa-miR-3065-5p  |
| USF1 | hsa-miR-26a-5p   |
| USF1 | hsa-miR-2682-5p  |
| USF1 | hsa-miR-210-3p   |
| USF1 | hsa-miR-21-5p    |
| USF1 | hsa-miR-199a-5p  |
| USF1 | hsa-miR-199a-3p  |
| USF1 | hsa-miR-1908-5p  |
| USF1 | hsa-miR-150-5p   |
| USF1 | hsa-miR-146b-5p  |
| USF1 | hsa-miR-137      |
| USF1 | hsa-miR-125b-5p  |
| USF1 | hsa-miR-124-3p   |
| USF1 | hsa-miR-1181     |
| USF1 | hsa-let-7a-5p    |
| USF2 | HIF1A            |
| USF2 | IL17A            |

|      |                  |
|------|------------------|
| USF2 | NFKB1            |
| USF2 | PTGS2            |
| USF2 | SMAD3            |
| USF2 | STAT3            |
| USF2 | TGFB1            |
| USF2 | TLR4             |
| USF2 | TNF              |
| USF2 | TP53             |
| USF2 | hsa-let-7i-5p    |
| USF2 | hsa-miR-130a-3p  |
| USF2 | hsa-miR-130b-3p  |
| USF2 | hsa-miR-1322     |
| USF2 | hsa-miR-142-3p   |
| USF2 | hsa-miR-144-3p   |
| USF2 | hsa-miR-145-5p   |
| USF2 | hsa-miR-18a-3p   |
| USF2 | hsa-miR-18a-5p   |
| USF2 | hsa-miR-2110     |
| USF2 | hsa-miR-320a     |
| USF2 | hsa-miR-4470     |
| USF2 | hsa-miR-4651     |
| USF2 | hsa-miR-4736     |
| USF2 | hsa-miR-4799-5p  |
| USF2 | hsa-miR-484      |
| USF2 | hsa-miR-93-5p    |
| USF2 | hsa-miR-935      |
| USF2 | hsa-miR-942-5p   |
| USF2 | hsa-miR-92a-3p   |
| USF2 | hsa-miR-92a-1-5p |
| USF2 | hsa-miR-7110-5p  |
| USF2 | hsa-miR-7110-3p  |
| USF2 | hsa-miR-6871-3p  |
| USF2 | hsa-miR-6835-5p  |
| USF2 | hsa-miR-6825-5p  |
| USF2 | hsa-miR-6809-3p  |
| USF2 | hsa-miR-6797-5p  |
| USF2 | hsa-miR-6785-5p  |
| USF2 | hsa-miR-6766-5p  |
| USF2 | hsa-miR-6762-3p  |
| USF2 | hsa-miR-618      |

|      |                  |
|------|------------------|
| USF2 | hsa-miR-589-5p   |
| USF2 | hsa-miR-589-3p   |
| USF2 | hsa-miR-5703     |
| USF2 | hsa-miR-5692a    |
| USF2 | hsa-miR-5197-5p  |
| USF2 | hsa-miR-5196-3p  |
| USF2 | hsa-miR-5193     |
| USF2 | hsa-miR-4795-5p  |
| USF2 | hsa-miR-4763-3p  |
| USF2 | hsa-miR-4659b-3p |
| USF2 | hsa-miR-4659a-3p |
| USF2 | hsa-miR-449c-5p  |
| USF2 | hsa-miR-4434     |
| USF2 | hsa-miR-4306     |
| USF2 | hsa-miR-3934-5p  |
| USF2 | hsa-miR-375      |
| USF2 | hsa-miR-324-5p   |
| USF2 | hsa-miR-324-3p   |
| USF2 | hsa-miR-3199     |
| USF2 | hsa-miR-3128     |
| USF2 | hsa-miR-30a-5p   |
| USF2 | hsa-miR-27a-3p   |
| USF2 | hsa-miR-26a-5p   |
| USF2 | hsa-miR-25-3p    |
| USF2 | hsa-miR-24-3p    |
| USF2 | hsa-miR-22-3p    |
| USF2 | hsa-miR-210-3p   |
| USF2 | hsa-miR-20a-5p   |
| USF2 | hsa-miR-19b-3p   |
| USF2 | hsa-miR-19a-3p   |
| USF2 | hsa-miR-199b-5p  |
| USF2 | hsa-miR-1908-5p  |
| USF2 | hsa-miR-17-5p    |
| USF2 | hsa-miR-146b-5p  |
| USF2 | hsa-miR-1249-5p  |
| USF2 | hsa-miR-1207-5p  |
| USF2 | hsa-miR-106b-5p  |
| USF2 | hsa-miR-106b-3p  |
| USF2 | hsa-let-7b-5p    |
| USF2 | hsa-let-7a-5p    |

|       |                 |
|-------|-----------------|
| VDR   | STAT3           |
| VDR   | TGFB1           |
| VDR   | TP53            |
| VDR   | TNF             |
| VDR   | HIF1A           |
| VDR   | hsa-let-7a-5p   |
| VDR   | hsa-miR-1207-5p |
| VDR   | hsa-miR-1288-5p |
| VDR   | hsa-miR-139-5p  |
| VDR   | hsa-miR-142-3p  |
| VDR   | hsa-miR-150-5p  |
| VDR   | hsa-miR-153-5p  |
| VDR   | hsa-miR-1908-5p |
| VDR   | hsa-miR-1910-3p |
| VDR   | hsa-miR-21-5p   |
| VDR   | hsa-miR-211-5p  |
| VDR   | hsa-miR-30d-5p  |
| VDR   | hsa-miR-7-5p    |
| VDR   | hsa-miR-92b-3p  |
| VDR   | hsa-miR-9-5p    |
| VDR   | hsa-miR-6872-3p |
| VDR   | hsa-miR-6789-3p |
| VDR   | hsa-miR-663a    |
| VDR   | hsa-miR-612     |
| VDR   | hsa-miR-5703    |
| VDR   | hsa-miR-4795-5p |
| VDR   | hsa-miR-4763-3p |
| VDR   | hsa-miR-4738-3p |
| VDR   | hsa-miR-4651    |
| VDR   | hsa-miR-4434    |
| VDR   | hsa-miR-3662    |
| VDR   | hsa-miR-320a    |
| VDR   | hsa-miR-2110    |
| VDR   | hsa-miR-194-3p  |
| VDR   | hsa-miR-155-5p  |
| VDR   | hsa-let-7i-5p   |
| VDR   | hsa-let-7b-5p   |
| VEZF1 | PTGS2           |
| VEZF1 | SMAD3           |
| VEZF1 | STAT3           |

|       |                  |
|-------|------------------|
| VEZF1 | TP53             |
| VEZF1 | hsa-miR-92b-3p   |
| VEZF1 | hsa-miR-92a-3p   |
| VEZF1 | hsa-miR-92a-1-5p |
| VEZF1 | hsa-miR-9-5p     |
| VEZF1 | hsa-miR-6789-3p  |
| VEZF1 | hsa-miR-484      |
| VEZF1 | hsa-miR-4651     |
| VEZF1 | hsa-miR-4434     |
| VEZF1 | hsa-miR-2110     |
| VEZF1 | hsa-miR-20a-5p   |
| VEZF1 | hsa-miR-203a-3p  |
| VEZF1 | hsa-miR-19b-3p   |
| VEZF1 | hsa-miR-19a-3p   |
| VEZF1 | hsa-miR-194-3p   |
| VEZF1 | hsa-miR-18a-5p   |
| VEZF1 | hsa-miR-18a-3p   |
| VEZF1 | hsa-miR-17-5p    |
| VEZF1 | hsa-miR-1181     |
| WHSC1 | HIF1A            |
| WHSC1 | NFKB1            |
| WHSC1 | STAT3            |
| WHSC1 | TP53             |
| WHSC1 | hsa-let-7a-5p    |
| WHSC1 | hsa-miR-101-3p   |
| WHSC1 | hsa-miR-146b-5p  |
| WHSC1 | hsa-miR-187-3p   |
| WHSC1 | hsa-miR-449c-5p  |
| WHSC1 | hsa-miR-4748     |
| WHSC1 | hsa-miR-622      |
| WHSC1 | hsa-miR-942-5p   |
| WHSC1 | hsa-miR-940      |
| WHSC1 | hsa-miR-922      |
| WHSC1 | hsa-miR-877-3p   |
| WHSC1 | hsa-miR-6807-5p  |
| WHSC1 | hsa-miR-6807-3p  |
| WHSC1 | hsa-miR-6797-5p  |
| WHSC1 | hsa-miR-6778-5p  |
| WHSC1 | hsa-miR-6751-5p  |
| WHSC1 | hsa-miR-625-3p   |

|       |                  |
|-------|------------------|
| WHSC1 | hsa-miR-5089-3p  |
| WHSC1 | hsa-miR-4728-5p  |
| WHSC1 | hsa-miR-4659b-3p |
| WHSC1 | hsa-miR-4659a-3p |
| WHSC1 | hsa-miR-4487     |
| WHSC1 | hsa-miR-3658     |
| WHSC1 | hsa-miR-335-5p   |
| WHSC1 | hsa-miR-3199     |
| WHSC1 | hsa-miR-3128     |
| WHSC1 | hsa-miR-30b-5p   |
| WHSC1 | hsa-miR-3074-3p  |
| WHSC1 | hsa-miR-27a-3p   |
| WHSC1 | hsa-miR-24-3p    |
| WHSC1 | hsa-miR-195-5p   |
| WHSC1 | hsa-miR-151a-3p  |
| WHSC1 | hsa-miR-144-3p   |
| WHSC1 | hsa-miR-1285-3p  |
| WHSC1 | hsa-miR-128-3p   |
| WHSC1 | hsa-miR-1273f    |
| WIZ   | IL6              |
| WIZ   | hsa-miR-630      |
| WIZ   | hsa-miR-452-5p   |
| XBP1  | HIF1A            |
| XBP1  | STAT3            |
| XBP1  | TP53             |
| XBP1  | hsa-miR-6845-3p  |
| XBP1  | hsa-miR-589-5p   |
| XBP1  | hsa-miR-589-3p   |
| XBP1  | hsa-miR-4470     |
| XBP1  | hsa-miR-4279     |
| XBP1  | hsa-miR-3165     |
| XBP1  | hsa-miR-199a-5p  |
| XBP1  | hsa-miR-199a-3p  |
| XBP1  | hsa-miR-1207-5p  |
| XBP1  | hsa-let-7i-5p    |
| YY1   | HIF1A            |
| YY1   | IL6              |
| YY1   | NFKB1            |
| YY1   | PTGS2            |
| YY1   | SMAD3            |

|     |                 |
|-----|-----------------|
| YY1 | STAT3           |
| YY1 | TGFB1           |
| YY1 | TNF             |
| YY1 | TP53            |
| YY1 | hsa-miR-1181    |
| YY1 | hsa-miR-1234-3p |
| YY1 | hsa-miR-124-3p  |
| YY1 | hsa-miR-144-3p  |
| YY1 | hsa-miR-199b-5p |
| YY1 | hsa-miR-2110    |
| YY1 | hsa-miR-24-3p   |
| YY1 | hsa-miR-320a    |
| YY1 | hsa-miR-4470    |
| YY1 | hsa-miR-484     |
| YY1 | hsa-miR-589-3p  |
| YY1 | hsa-miR-589-5p  |
| YY1 | hsa-miR-608     |
| YY1 | hsa-miR-937-5p  |
| YY1 | hsa-miR-942-5p  |
| YY1 | hsa-miR-935     |
| YY1 | hsa-miR-93-5p   |
| YY1 | hsa-miR-92b-3p  |
| YY1 | hsa-miR-9-5p    |
| YY1 | hsa-miR-889-3p  |
| YY1 | hsa-miR-8085    |
| YY1 | hsa-miR-7150    |
| YY1 | hsa-miR-7113-5p |
| YY1 | hsa-miR-7110-5p |
| YY1 | hsa-miR-7110-3p |
| YY1 | hsa-miR-7-5p    |
| YY1 | hsa-miR-6893-5p |
| YY1 | hsa-miR-6875-3p |
| YY1 | hsa-miR-6872-3p |
| YY1 | hsa-miR-6842-5p |
| YY1 | hsa-miR-6825-5p |
| YY1 | hsa-miR-6815-3p |
| YY1 | hsa-miR-6808-5p |
| YY1 | hsa-miR-6806-5p |
| YY1 | hsa-miR-6803-5p |
| YY1 | hsa-miR-6789-3p |

|     |                  |
|-----|------------------|
| YY1 | hsa-miR-6766-5p  |
| YY1 | hsa-miR-6760-5p  |
| YY1 | hsa-miR-6754-5p  |
| YY1 | hsa-miR-6752-5p  |
| YY1 | hsa-miR-6749-3p  |
| YY1 | hsa-miR-6722-3p  |
| YY1 | hsa-miR-663a     |
| YY1 | hsa-miR-622      |
| YY1 | hsa-miR-618      |
| YY1 | hsa-miR-5703     |
| YY1 | hsa-miR-5702     |
| YY1 | hsa-miR-5693     |
| YY1 | hsa-miR-5681b    |
| YY1 | hsa-miR-5681a    |
| YY1 | hsa-miR-5193     |
| YY1 | hsa-miR-485-5p   |
| YY1 | hsa-miR-4795-5p  |
| YY1 | hsa-miR-4748     |
| YY1 | hsa-miR-4738-3p  |
| YY1 | hsa-miR-4736     |
| YY1 | hsa-miR-4728-5p  |
| YY1 | hsa-miR-4697-3p  |
| YY1 | hsa-miR-4684-5p  |
| YY1 | hsa-miR-4682     |
| YY1 | hsa-miR-4659b-3p |
| YY1 | hsa-miR-4651     |
| YY1 | hsa-miR-4531     |
| YY1 | hsa-miR-4510     |
| YY1 | hsa-miR-449c-5p  |
| YY1 | hsa-miR-4487     |
| YY1 | hsa-miR-4418     |
| YY1 | hsa-miR-4306     |
| YY1 | hsa-miR-4290     |
| YY1 | hsa-miR-4286     |
| YY1 | hsa-miR-4279     |
| YY1 | hsa-miR-424-5p   |
| YY1 | hsa-miR-3934-5p  |
| YY1 | hsa-miR-380-5p   |
| YY1 | hsa-miR-375      |
| YY1 | hsa-miR-371b-3p  |



|     |                 |
|-----|-----------------|
| YY1 | hsa-miR-365a-5p |
| YY1 | hsa-miR-365a-3p |
| YY1 | hsa-miR-3658    |
| YY1 | hsa-miR-34b-5p  |
| YY1 | hsa-miR-33a-5p  |
| YY1 | hsa-miR-329-5p  |
| YY1 | hsa-miR-324-5p  |
| YY1 | hsa-miR-324-3p  |
| YY1 | hsa-miR-3199    |
| YY1 | hsa-miR-3165    |
| YY1 | hsa-miR-30c-5p  |
| YY1 | hsa-miR-3074-3p |
| YY1 | hsa-miR-299-5p  |
| YY1 | hsa-miR-27a-3p  |
| YY1 | hsa-miR-26b-5p  |
| YY1 | hsa-miR-26a-5p  |
| YY1 | hsa-miR-2682-5p |
| YY1 | hsa-miR-25-3p   |
| YY1 | hsa-miR-22-3p   |
| YY1 | hsa-miR-211-5p  |
| YY1 | hsa-miR-210-3p  |
| YY1 | hsa-miR-21-5p   |
| YY1 | hsa-miR-203a-3p |
| YY1 | hsa-miR-200a-3p |
| YY1 | hsa-miR-199a-5p |
| YY1 | hsa-miR-199a-3p |
| YY1 | hsa-miR-195-5p  |
| YY1 | hsa-miR-194-3p  |
| YY1 | hsa-miR-193b-3p |
| YY1 | hsa-miR-1910-3p |
| YY1 | hsa-miR-1908-5p |
| YY1 | hsa-miR-185-5p  |
| YY1 | hsa-miR-155-5p  |
| YY1 | hsa-miR-153-5p  |
| YY1 | hsa-miR-149-5p  |
| YY1 | hsa-miR-149-3p  |
| YY1 | hsa-miR-146b-5p |
| YY1 | hsa-miR-145-5p  |
| YY1 | hsa-miR-143-3p  |
| YY1 | hsa-miR-142-3p  |

|        |                 |
|--------|-----------------|
| YY1    | hsa-miR-138-5p  |
| YY1    | hsa-miR-137     |
| YY1    | hsa-miR-1322    |
| YY1    | hsa-miR-132-3p  |
| YY1    | hsa-miR-130b-3p |
| YY1    | hsa-miR-1249-5p |
| YY1    | hsa-miR-1207-5p |
| YY1    | hsa-miR-106b-5p |
| YY1    | hsa-miR-106b-3p |
| YY1    | hsa-miR-101-3p  |
| YY1    | hsa-let-7i-5p   |
| YY1    | hsa-let-7a-5p   |
| ZBED4  | HIF1A           |
| ZBED4  | SMAD3           |
| ZBED4  | STAT3           |
| ZBED4  | hsa-miR-6797-5p |
| ZBED4  | hsa-miR-6778-5p |
| ZBTB4  | TGFB1           |
| ZBTB7A | HIF1A           |
| ZBTB7A | NFKB1           |
| ZBTB7A | SMAD3           |
| ZBTB7A | STAT3           |
| ZBTB7A | TGFB1           |
| ZBTB7A | hsa-miR-210-3p  |
| ZBTB7A | hsa-miR-2110    |
| ZBTB7A | hsa-miR-320a    |
| ZBTB7A | hsa-miR-663a    |
| ZBTB7A | hsa-miR-92b-3p  |
| ZBTB7A | hsa-miR-9-5p    |
| ZBTB7A | hsa-miR-8085    |
| ZBTB7A | hsa-miR-7-5p    |
| ZBTB7A | hsa-miR-6872-3p |
| ZBTB7A | hsa-miR-6833-3p |
| ZBTB7A | hsa-miR-6809-3p |
| ZBTB7A | hsa-miR-6760-5p |
| ZBTB7A | hsa-miR-612     |
| ZBTB7A | hsa-miR-5193    |
| ZBTB7A | hsa-miR-4795-5p |
| ZBTB7A | hsa-miR-4736    |
| ZBTB7A | hsa-miR-4531    |

|        |                 |
|--------|-----------------|
| ZBTB7A | hsa-miR-449c-5p |
| ZBTB7A | hsa-miR-4487    |
| ZBTB7A | hsa-miR-4470    |
| ZBTB7A | hsa-miR-4434    |
| ZBTB7A | hsa-miR-34b-5p  |
| ZBTB7A | hsa-miR-200a-3p |
| ZBTB7A | hsa-miR-199b-5p |
| ZBTB7A | hsa-miR-195-5p  |
| ZBTB7A | hsa-miR-193b-3p |
| ZBTB7A | hsa-miR-181c-5p |
| ZBTB7A | hsa-miR-150-5p  |
| ZBTB7A | hsa-miR-146b-5p |
| ZBTB7A | hsa-miR-145-5p  |
| ZBTB7A | hsa-miR-144-3p  |
| ZBTB7A | hsa-miR-143-3p  |
| ZBTB7A | hsa-miR-142-3p  |
| ZBTB7A | hsa-miR-138-5p  |
| ZBTB7A | hsa-miR-125a-5p |
| ZBTB7A | hsa-miR-1234-3p |
| ZBTB7A | hsa-miR-1207-5p |
| ZBTB7A | hsa-let-7e-5p   |
| ZBTB7A | hsa-let-7a-5p   |
| ZEB1   | HIF1A           |
| ZEB1   | NFKB1           |
| ZEB1   | PTGS2           |
| ZEB1   | SMAD3           |
| ZEB1   | STAT3           |
| ZEB1   | TGFB1           |
| ZEB1   | TNF             |
| ZEB1   | TP53            |
| ZEB1   | hsa-miR-142-3p  |
| ZEB1   | hsa-miR-2110    |
| ZEB1   | hsa-miR-320a    |
| ZEB1   | hsa-miR-6872-3p |
| ZEB1   | hsa-miR-6749-3p |
| ZEB1   | hsa-miR-589-5p  |
| ZEB1   | hsa-miR-589-3p  |
| ZEB1   | hsa-miR-5193    |
| ZEB1   | hsa-miR-4531    |
| ZEB1   | hsa-miR-150-5p  |

|         |                 |
|---------|-----------------|
| ZEB1    | hsa-miR-139-5p  |
| ZFHX3   | PTGS2           |
| ZFHX3   | TP53            |
| ZFP42   | HIF1A           |
| ZFP42   | STAT3           |
| ZFP42   | TGFB1           |
| ZFP42   | TP53            |
| ZFP42   | hsa-miR-9-5p    |
| ZFP42   | hsa-miR-4271    |
| ZFP42   | hsa-miR-1234-3p |
| ZFX     | HIF1A           |
| ZFX     | NFKB1           |
| ZFX     | TP53            |
| ZFX     | hsa-miR-942-5p  |
| ZFX     | hsa-miR-27a-3p  |
| ZFX     | hsa-miR-24-3p   |
| ZFX     | hsa-miR-199a-5p |
| ZFX     | hsa-miR-199a-3p |
| ZKSCAN1 | HIF1A           |
| ZKSCAN1 | PTGS2           |
| ZKSCAN1 | SMAD3           |
| ZKSCAN1 | STAT3           |
| ZKSCAN1 | TP53            |
| ZKSCAN1 | hsa-miR-132-3p  |
| ZKSCAN1 | hsa-miR-1908-5p |
| ZKSCAN1 | hsa-miR-22-3p   |
| ZKSCAN1 | hsa-miR-31-5p   |
| ZMIZ1   | HIF1A           |
| ZMIZ1   | IL6             |
| ZMIZ1   | NFKB1           |
| ZMIZ1   | SMAD3           |
| ZMIZ1   | STAT3           |
| ZMIZ1   | TGFB1           |
| ZMIZ1   | TP53            |
| ZMIZ1   | hsa-miR-106b-3p |
| ZMIZ1   | hsa-miR-106b-5p |
| ZMIZ1   | hsa-miR-1181    |
| ZMIZ1   | hsa-miR-320a    |
| ZMIZ1   | hsa-miR-6835-5p |
| ZMIZ1   | hsa-miR-5193    |

|        |                 |
|--------|-----------------|
| ZMIZ1  | hsa-miR-424-5p  |
| ZMIZ1  | hsa-miR-30b-5p  |
| ZNF143 | HIF1A           |
| ZNF143 | IL6             |
| ZNF143 | NFKB1           |
| ZNF143 | PTGS2           |
| ZNF143 | SMAD3           |
| ZNF143 | STAT3           |
| ZNF143 | TGFB1           |
| ZNF143 | TNF             |
| ZNF143 | TP53            |
| ZNF143 | hsa-miR-1207-5p |
| ZNF143 | hsa-miR-130a-3p |
| ZNF143 | hsa-miR-132-3p  |
| ZNF143 | hsa-miR-143-3p  |
| ZNF143 | hsa-miR-145-5p  |
| ZNF143 | hsa-miR-155-5p  |
| ZNF143 | hsa-miR-1908-5p |
| ZNF143 | hsa-miR-193b-3p |
| ZNF143 | hsa-miR-2110    |
| ZNF143 | hsa-miR-22-3p   |
| ZNF143 | hsa-miR-4470    |
| ZNF143 | hsa-miR-484     |
| ZNF143 | hsa-miR-9-5p    |
| ZNF143 | hsa-miR-935     |
| ZNF143 | hsa-miR-8085    |
| ZNF143 | hsa-miR-7151-3p |
| ZNF143 | hsa-miR-7110-5p |
| ZNF143 | hsa-miR-7110-3p |
| ZNF143 | hsa-miR-7-5p    |
| ZNF143 | hsa-miR-6809-3p |
| ZNF143 | hsa-miR-6785-5p |
| ZNF143 | hsa-miR-6760-5p |
| ZNF143 | hsa-miR-625-3p  |
| ZNF143 | hsa-miR-618     |
| ZNF143 | hsa-miR-589-5p  |
| ZNF143 | hsa-miR-589-3p  |
| ZNF143 | hsa-miR-5196-3p |
| ZNF143 | hsa-miR-4736    |
| ZNF143 | hsa-miR-4697-3p |

|        |                 |
|--------|-----------------|
| ZNF143 | hsa-miR-4290    |
| ZNF143 | hsa-miR-4279    |
| ZNF143 | hsa-miR-3662    |
| ZNF143 | hsa-miR-3529-3p |
| ZNF143 | hsa-miR-324-5p  |
| ZNF143 | hsa-miR-324-3p  |
| ZNF143 | hsa-miR-30e-5p  |
| ZNF143 | hsa-miR-222-3p  |
| ZNF143 | hsa-miR-195-5p  |
| ZNF143 | hsa-miR-1468-3p |
| ZNF143 | hsa-miR-1322    |
| ZNF143 | hsa-miR-128-3p  |
| ZNF143 | hsa-miR-1249-5p |
| ZNF143 | hsa-miR-124-3p  |
| ZNF143 | hsa-let-7a-5p   |
| ZNF217 | NFKB1           |
| ZNF217 | SMAD3           |
| ZNF217 | hsa-let-7e-5p   |
| ZNF217 | hsa-miR-155-5p  |
| ZNF217 | hsa-miR-21-5p   |
| ZNF217 | hsa-miR-211-5p  |
| ZNF217 | hsa-miR-24-3p   |
| ZNF217 | hsa-miR-27a-3p  |
| ZNF217 | hsa-miR-365a-3p |
| ZNF217 | hsa-miR-365a-5p |
| ZNF217 | hsa-miR-4698    |
| ZNF217 | hsa-miR-4738-3p |
| ZNF217 | hsa-miR-92b-3p  |
| ZNF217 | hsa-miR-937-5p  |
| ZNF217 | hsa-miR-4799-5p |
| ZNF250 | HIF1A           |
| ZNF250 | IL6             |
| ZNF250 | PTGS2           |
| ZNF250 | SMAD3           |
| ZNF250 | STAT3           |
| ZNF250 | TP53            |
| ZNF250 | hsa-miR-1273f   |
| ZNF250 | hsa-miR-1178-3p |
| ZNF263 | HIF1A           |
| ZNF263 | SMAD3           |

|        |                 |
|--------|-----------------|
| ZNF263 | STAT3           |
| ZNF263 | TGFB1           |
| ZNF263 | FOXP3           |
| ZNF263 | IL6             |
| ZNF263 | NFKB1           |
| ZNF263 | PTGS2           |
| ZNF263 | TP53            |
| ZNF263 | hsa-let-7e-5p   |
| ZNF263 | hsa-miR-106b-3p |
| ZNF263 | hsa-miR-106b-5p |
| ZNF263 | hsa-miR-1249-5p |
| ZNF263 | hsa-miR-125a-5p |
| ZNF263 | hsa-miR-142-3p  |
| ZNF263 | hsa-miR-17-5p   |
| ZNF263 | hsa-miR-18a-3p  |
| ZNF263 | hsa-miR-18a-5p  |
| ZNF263 | hsa-miR-19a-3p  |
| ZNF263 | hsa-miR-20a-5p  |
| ZNF263 | hsa-miR-2110    |
| ZNF263 | hsa-miR-320a    |
| ZNF263 | hsa-miR-663a    |
| ZNF263 | hsa-miR-93-5p   |
| ZNF263 | hsa-miR-9-5p    |
| ZNF263 | hsa-miR-8085    |
| ZNF263 | hsa-miR-6882-5p |
| ZNF263 | hsa-miR-6845-3p |
| ZNF263 | hsa-miR-6808-5p |
| ZNF263 | hsa-miR-6797-5p |
| ZNF263 | hsa-miR-6785-5p |
| ZNF263 | hsa-miR-4728-5p |
| ZNF263 | hsa-miR-3934-5p |
| ZNF263 | hsa-miR-3199    |
| ZNF263 | hsa-miR-26b-5p  |
| ZNF263 | hsa-miR-26a-5p  |
| ZNF263 | hsa-miR-25-3p   |
| ZNF263 | hsa-miR-150-5p  |
| ZNF263 | hsa-miR-139-5p  |
| ZNF263 | hsa-miR-124-3p  |
| ZNF384 | FOXP3           |
| ZNF384 | HIF1A           |

|        |                 |
|--------|-----------------|
| ZNF384 | STAT3           |
| ZNF384 | TGFB1           |
| ZNF384 | TNF             |
| ZNF384 | TP53            |
| ZNF384 | hsa-miR-2110    |
| ZNF384 | hsa-miR-22-3p   |
| ZNF384 | hsa-miR-320a    |
| ZNF384 | hsa-miR-4470    |
| ZNF384 | hsa-miR-449c-5p |
| ZNF384 | hsa-miR-484     |
| ZNF384 | hsa-miR-9-5p    |
| ZNF384 | hsa-miR-7-5p    |
| ZNF384 | hsa-miR-6833-3p |
| ZNF384 | hsa-miR-6815-3p |
| ZNF384 | hsa-miR-5196-3p |
| ZNF384 | hsa-miR-5094    |
| ZNF384 | hsa-miR-504-5p  |
| ZNF384 | hsa-miR-4650-5p |
| ZNF384 | hsa-miR-4531    |
| ZNF384 | hsa-miR-4487    |
| ZNF384 | hsa-miR-4270    |
| ZNF384 | hsa-miR-3165    |
| ZNF384 | hsa-miR-3128    |
| ZNF384 | hsa-miR-30e-5p  |
| ZNF384 | hsa-miR-27a-3p  |
| ZNF384 | hsa-miR-24-3p   |
| ZNF384 | hsa-miR-199b-5p |
| ZNF384 | hsa-miR-193b-3p |
| ZNF384 | hsa-miR-155-5p  |
| ZNF384 | hsa-miR-144-3p  |
| ZNF384 | hsa-miR-143-3p  |
| ZNF384 | hsa-miR-142-3p  |
| ZNF384 | hsa-miR-138-5p  |
| ZNF384 | hsa-miR-130a-3p |
| ZNF384 | hsa-miR-1285-3p |
| ZNF384 | hsa-miR-1273f   |
| ZNF384 | hsa-miR-124-3p  |
| ZNF384 | hsa-miR-1207-5p |
| ZNF384 | hsa-miR-101-3p  |
| ZNF407 | IL6             |



|        |                  |
|--------|------------------|
| ZNF407 | SMAD3            |
| ZNF407 | STAT3            |
| ZNF407 | TP53             |
| ZNF552 | TGFB1            |
| ZNF552 | hsa-miR-940      |
| ZNF552 | hsa-miR-937-5p   |
| ZNF552 | hsa-miR-935      |
| ZNF552 | hsa-miR-8085     |
| ZNF552 | hsa-miR-6893-5p  |
| ZNF552 | hsa-miR-6845-3p  |
| ZNF552 | hsa-miR-6808-5p  |
| ZNF552 | hsa-miR-6807-5p  |
| ZNF552 | hsa-miR-6807-3p  |
| ZNF552 | hsa-miR-6749-3p  |
| ZNF552 | hsa-miR-6511a-5p |
| ZNF552 | hsa-miR-5193     |
| ZNF552 | hsa-miR-484      |
| ZNF552 | hsa-miR-449c-5p  |
| ZNF552 | hsa-miR-4487     |
| ZNF552 | hsa-miR-365a-5p  |
| ZNF552 | hsa-miR-365a-3p  |
| ZNF552 | hsa-miR-2682-5p  |
| ZNF552 | hsa-miR-210-3p   |
| ZNF552 | hsa-miR-203a-3p  |
| ZNF552 | hsa-miR-200a-3p  |
| ZNF552 | hsa-miR-199b-5p  |
| ZNF552 | hsa-miR-193b-3p  |
| ZNF552 | hsa-miR-1909-3p  |
| ZNF552 | hsa-miR-150-5p   |
| ZNF552 | hsa-miR-149-5p   |
| ZNF552 | hsa-miR-149-3p   |
| ZNF552 | hsa-miR-146b-5p  |
| ZNF552 | hsa-miR-142-3p   |
| ZNF552 | hsa-miR-139-5p   |
| ZNF552 | hsa-miR-137      |
| ZNF552 | hsa-miR-132-3p   |
| ZNF552 | hsa-miR-124-3p   |
| ZNF83  | HIF1A            |
| ZNF83  | STAT3            |
| ZNF83  | hsa-miR-6875-3p  |

ZNF83

hsa-miR-4799-5p

ZNF83

hsa-miR-1249-5p

---

**Supplemental Table 6: Transcription factors and miRNAs feed forward loops.** This table shows transcription factors feed forward loops, miRNAs feed forward loops and transcription factors-miRNAs composite feed forward loops. In TF FFLs, TFs regulate miRNAs, TFs regulate subcore genes and miRNAs regulate subcore genes, while miRNAs do not regulate subcore genes. In miRNAs FFLs, miRNAs regulate TFs, miRNAs regulate subcore genes and TFs regulate subcore genes, while TFs do not regulate miRNAs. In TF-miRNA composite FFL, both TFs and miRNAs regulate each other and subcore genes.

| Transcription factor FFL |                 |               | miRNA FFL     |         |               | TF-miRNA composite FFL |                  |               |
|--------------------------|-----------------|---------------|---------------|---------|---------------|------------------------|------------------|---------------|
| TF                       | miRNAs          | Subcore genes | miRNAs        | TF      | Subcore genes | TF                     | miRNAs           | Subcore genes |
| AFF1                     | hsa-miR-199a-5p | NFKB1         | hsa-let-7a-5p | AHR     | IL6           | AR                     | hsa-miR-124-3p   | IL6           |
| AFF1                     | hsa-miR-199a-5p | HIF1A         | hsa-let-7a-5p | E2F2    | PTGS2         | AR                     | hsa-miR-124-3p   | STAT3         |
| AR                       | hsa-miR-3165    | TP53          | hsa-let-7a-5p | E2F1    | PTGS2         | AR                     | hsa-miR-491-5p   | TP53          |
| AR                       | hsa-miR-26a-5p  | IL6           | hsa-let-7a-5p | E2F1    | NFKB1         | AR                     | hsa-miR-491-5p   | SMAD3         |
| AR                       | hsa-miR-203a-3p | IL6           | hsa-let-7a-5p | E2F6    | IL6           | AR                     | hsa-miR-92a-2-5p | TP53          |
| AR                       | hsa-miR-210-3p  | NFKB1         | hsa-let-7a-5p | E2F6    | PTGS2         | AR                     | hsa-miR-6511a-5p | HIF1A         |
| AR                       | hsa-miR-210-3p  | HIF1A         | hsa-let-7a-5p | E2F6    | NFKB1         | AR                     | hsa-miR-5193     | TP53          |
| AR                       | hsa-miR-150-5p  | TP53          | hsa-let-7a-5p | BACH1   | IL6           | AR                     | hsa-miR-6809-3p  | STAT3         |
| AR                       | hsa-miR-365a-3p | IL6           | hsa-let-7a-5p | BACH1   | PTGS2         | AR                     | hsa-let-7b-5p    | TLR4          |
| AR                       | hsa-miR-130b-3p | STAT3         | hsa-let-7a-5p | BACH1   | NFKB1         | AR                     | hsa-let-7b-5p    | HIF1A         |
| AR                       | hsa-miR-877-3p  | STAT3         | hsa-let-7a-5p | PRDM1   | IL6           | AR                     | hsa-miR-4725-3p  | TP53          |
| AR                       | hsa-miR-143-3p  | SMAD3         | hsa-let-7a-5p | HAND1   | NFKB1         | ARID3A                 | hsa-miR-30b-5p   | TP53          |
| AR                       | hsa-miR-149-3p  | TP53          | hsa-let-7b-5p | SMARCC2 | PTGS2         | ARID3A                 | hsa-let-7a-5p    | IL6           |
| AR                       | hsa-miR-22-3p   | HIF1A         | hsa-let-7b-5p | SMARCC2 | TLR4          | ARID3A                 | hsa-let-7a-5p    | NFKB1         |
| AR                       | hsa-miR-622     | TP53          | hsa-let-7b-5p | SMARCC2 | HIF1A         | ATF2                   | hsa-miR-19b-3p   | TGFB1         |
| AR                       | hsa-miR-6722-3p | TP53          | hsa-let-7b-5p | NFATC1  | HIF1A         | ATF2                   | hsa-miR-19b-3p   | TP53          |
| AR                       | hsa-miR-4470    | HIF1A         | hsa-let-7b-5p | SMARCC1 | PTGS2         | BCL6                   | hsa-miR-9-5p     | NFKB1         |
| AR                       | hsa-miR-4282    | HIF1A         | hsa-let-7b-5p | SMARCC1 | TLR4          | BCL6                   | hsa-miR-30b-5p   | TP53          |
| AR                       | hsa-miR-6845-3p | STAT3         | hsa-let-7b-5p | SMARCC1 | HIF1A         | BCL6                   | hsa-miR-124-3p   | IL6           |
| AR                       | hsa-miR-146b-5p | NFKB1         | hsa-let-7b-5p | HIF1A   | PTGS2         | BCL6                   | hsa-miR-124-3p   | STAT3         |
| AR                       | hsa-miR-146b-5p | TLR4          | hsa-let-7b-5p | HAND1   | HIF1A         | BCLAF1                 | hsa-miR-142-3p   | IL6           |
| AR                       | hsa-miR-92a-3p  | NFKB1         | hsa-let-7b-5p | BACH1   | PTGS2         | BHLHE40                | hsa-miR-195-5p   | SMAD3         |
| AR                       | hsa-miR-18b-5p  | HIF1A         | hsa-let-7b-5p | BACH1   | HIF1A         | CDX2                   | hsa-miR-9-5p     | NFKB1         |
| AR                       | hsa-miR-8055    | HIF1A         | hsa-let-7b-5p | MYC     | PTGS2         | CEBPA                  | hsa-miR-744-5p   | PTGS2         |

|    |                  |       |               |         |       |       |                 |       |
|----|------------------|-------|---------------|---------|-------|-------|-----------------|-------|
| AR | hsa-miR-324-3p   | TGFB1 | hsa-let-7b-5p | MYC     | TLR4  | CEBPB | hsa-miR-663a    | TGFB1 |
| AR | hsa-miR-30d-5p   | TP53  | hsa-let-7b-5p | MYC     | HIF1A | CEBPB | hsa-miR-155-5p  | IL6   |
| AR | hsa-miR-5681a    | STAT3 | hsa-let-7b-5p | E2F7    | PTGS2 | CEBPB | hsa-miR-155-5p  | NFKB1 |
| AR | hsa-miR-5681b    | HIF1A | hsa-let-7b-5p | E2F7    | HIF1A | CEBPB | hsa-miR-155-5p  | IL2   |
| AR | hsa-let-7i-5p    | TLR4  | hsa-let-7b-5p | SP1     | PTGS2 | CEBPB | hsa-miR-155-5p  | SMAD3 |
| AR | hsa-miR-6755-5p  | HIF1A | hsa-let-7b-5p | SP1     | HIF1A | CLOCK | hsa-miR-19a-3p  | TP53  |
| AR | hsa-miR-92b-3p   | SMAD3 | hsa-let-7b-5p | CUX1    | TLR4  | CREB1 | hsa-miR-9-5p    | NFKB1 |
| AR | hsa-miR-106b-5p  | STAT3 | hsa-let-7b-5p | CUX1    | HIF1A | CREB1 | hsa-miR-93-5p   | TGFB1 |
| AR | hsa-miR-106b-5p  | HIF1A | hsa-let-7b-5p | ARID3A  | HIF1A | CREB1 | hsa-miR-93-5p   | STAT3 |
| AR | hsa-miR-3662     | HIF1A | hsa-let-7b-5p | E2F6    | PTGS2 | CREB1 | hsa-miR-93-5p   | HIF1A |
| AR | hsa-miR-199b-5p  | HIF1A | hsa-let-7b-5p | E2F6    | HIF1A | CREB1 | hsa-miR-106b-5p | STAT3 |
| AR | hsa-miR-365b-5p  | STAT3 | hsa-let-7b-5p | E2F3    | HIF1A | CREB1 | hsa-miR-106b-5p | HIF1A |
| AR | hsa-miR-92a-1-5p | TP53  | hsa-let-7b-5p | PRDM1   | HIF1A | CTCF  | hsa-miR-24-3p   | TGFB1 |
| AR | hsa-miR-18a-3p   | SMAD3 | hsa-let-7b-5p | ELK4    | PTGS2 | CTCF  | hsa-miR-1322    | HIF1A |
| AR | hsa-miR-7110-3p  | STAT3 | hsa-let-7b-5p | ELK4    | TLR4  | CTCF  | hsa-let-7b-5p   | PTGS2 |
| AR | hsa-miR-4799-5p  | HIF1A | hsa-let-7b-5p | HES1    | HIF1A | CTCF  | hsa-let-7b-5p   | TLR4  |
| AR | hsa-miR-4685-5p  | STAT3 | hsa-let-7c-5p | HSF1    | IL10  | CTCF  | hsa-let-7b-5p   | HIF1A |
| AR | hsa-miR-365a-5p  | STAT3 | hsa-let-7c-5p | SMARCC1 | PTGS2 | CTCF  | hsa-miR-3662    | HIF1A |
| AR | hsa-miR-6754-5p  | STAT3 | hsa-let-7c-5p | FOXO3   | PTGS2 | CUX1  | hsa-miR-155-5p  | IL6   |
| AR | hsa-miR-15b-5p   | SMAD3 | hsa-let-7c-5p | CEBPB   | IL6   | CUX1  | hsa-miR-155-5p  | NFKB1 |
| AR | hsa-miR-7-5p     | TLR4  | hsa-let-7c-5p | CEBPB   | PTGS2 | CUX1  | hsa-miR-155-5p  | SMAD3 |
| AR | hsa-miR-3658     | TLR4  | hsa-let-7c-5p | CEBPB   | IL10  | E2F2  | hsa-miR-22-3p   | HIF1A |
| AR | hsa-miR-155-5p   | IL6   | hsa-let-7c-5p | AHR     | IL6   | E2F3  | hsa-miR-106b-5p | HIF1A |
| AR | hsa-miR-155-5p   | NFKB1 | hsa-let-7c-5p | BACH1   | IL6   | E2F3  | hsa-miR-93-5p   | HIF1A |
| AR | hsa-miR-155-5p   | SMAD3 | hsa-let-7c-5p | BACH1   | PTGS2 | E2F4  | hsa-miR-124-3p  | IL6   |
| AR | hsa-miR-5692a    | HIF1A | hsa-let-7c-5p | USF2    | PTGS2 | E2F4  | hsa-miR-124-3p  | PTGS2 |
| AR | hsa-miR-4499     | HIF1A | hsa-let-7c-5p | MYC     | IL6   | E2F4  | hsa-miR-124-3p  | STAT3 |
| AR | hsa-miR-4738-3p  | TLR4  | hsa-let-7c-5p | MYC     | PTGS2 | E2F6  | hsa-miR-124-3p  | IL6   |
| AR | hsa-miR-6871-3p  | STAT3 | hsa-let-7c-5p | SETDB1  | PTGS2 | E2F6  | hsa-miR-124-3p  | PTGS2 |
| AR | hsa-miR-93-5p    | TGFB1 | hsa-let-7c-5p | ARID3A  | IL6   | E2F6  | hsa-miR-124-3p  | STAT3 |
| AR | hsa-miR-93-5p    | STAT3 | hsa-let-7c-5p | E2F6    | IL6   | EGR1  | hsa-miR-124-3p  | PTGS2 |
| AR | hsa-miR-93-5p    | HIF1A | hsa-let-7c-5p | E2F6    | PTGS2 | EGR1  | hsa-miR-124-3p  | STAT3 |
| AR | hsa-miR-5702     | TP53  | hsa-let-7c-5p | SPDEF   | PTGS2 | ELK1  | hsa-miR-150-5p  | TP53  |
| AR | hsa-miR-8071     | TP53  | hsa-let-7c-5p | MEF2C   | IL6   | ESR1  | hsa-miR-130b-3p | STAT3 |
| AR | hsa-miR-4290     | SMAD3 | hsa-let-7c-5p | SREBF1  | PTGS2 | ESR1  | hsa-miR-18a-5p  | TP53  |
| AR | hsa-miR-6893-5p  | HIF1A | hsa-let-7e-5p | ARID3A  | STAT3 | ESR1  | hsa-miR-18a-5p  | HIF1A |

|    |                 |       |                 |        |       |       |                  |       |
|----|-----------------|-------|-----------------|--------|-------|-------|------------------|-------|
| AR | hsa-miR-337-3p  | STAT3 | hsa-let-7e-5p   | TCF4   | STAT3 | ESR1  | hsa-miR-9-5p     | NFKB1 |
| AR | hsa-miR-663a    | TGFB1 | hsa-let-7e-5p   | STAT2  | STAT3 | ESR1  | hsa-miR-19a-3p   | TP53  |
| AR | hsa-miR-6789-3p | STAT3 | hsa-let-7e-5p   | E2F6   | STAT3 | ESR1  | hsa-miR-22-3p    | HIF1A |
| AR | hsa-miR-6875-3p | STAT3 | hsa-let-7e-5p   | BACH1  | STAT3 | ESR1  | hsa-miR-19b-3p   | TGFB1 |
| AR | hsa-miR-138-5p  | HIF1A | hsa-let-7e-5p   | SREBF1 | STAT3 | ESR1  | hsa-miR-19b-3p   | TP53  |
| AR | hsa-miR-19b-3p  | TGFB1 | hsa-let-7e-5p   | MYC    | STAT3 | ETS1  | hsa-miR-9-5p     | NFKB1 |
| AR | hsa-miR-19b-3p  | TP53  | hsa-let-7e-5p   | MXD1   | STAT3 | ETS1  | hsa-miR-193b-3p  | SMAD3 |
| AR | hsa-miR-633     | TGFB1 | hsa-miR-100-5p  | ESR1   | PTGS2 | ETS1  | hsa-miR-145-5p   | SMAD3 |
| AR | hsa-miR-26b-5p  | NFKB1 | hsa-miR-100-5p  | EGR2   | PTGS2 | ETS1  | hsa-miR-155-5p   | NFKB1 |
| AR | hsa-miR-18a-5p  | TP53  | hsa-miR-100-5p  | HOXA1  | PTGS2 | ETS1  | hsa-miR-155-5p   | SMAD3 |
| AR | hsa-miR-18a-5p  | HIF1A | hsa-miR-100-5p  | PATZ1  | PTGS2 | FOS   | hsa-miR-6872-3p  | STAT3 |
| AR | hsa-miR-18a-5p  | SMAD3 | hsa-miR-101-3p  | FOS    | PTGS2 | FOS   | hsa-miR-4438     | STAT3 |
| AR | hsa-miR-9-5p    | NFKB1 | hsa-miR-101-3p  | JUN    | PTGS2 | FOS   | hsa-miR-155-5p   | IL6   |
| AR | hsa-miR-371b-3p | STAT3 | hsa-miR-101-3p  | NR2F2  | PTGS2 | FOS   | hsa-miR-155-5p   | NFKB1 |
| AR | hsa-miR-6808-5p | HIF1A | hsa-miR-101-3p  | GMEB2  | PTGS2 | FOSL2 | hsa-miR-24-3p    | TGFB1 |
| AR | hsa-miR-16-5p   | NFKB1 | hsa-miR-101-3p  | ZEB1   | PTGS2 | FOXA1 | hsa-miR-30d-5p   | TP53  |
| AR | hsa-miR-16-5p   | TP53  | hsa-miR-106a-3p | GATA6  | HIF1A | FOXA1 | hsa-miR-30e-5p   | TP53  |
| AR | hsa-miR-16-5p   | SMAD3 | hsa-miR-106a-5p | SMAD4  | TP53  | FOXA1 | hsa-let-7a-5p    | IL6   |
| AR | hsa-miR-6760-5p | TP53  | hsa-miR-106a-5p | ELK4   | TP53  | FOXA1 | hsa-let-7a-5p    | NFKB1 |
| AR | hsa-miR-5197-5p | TP53  | hsa-miR-106a-5p | SP4    | TP53  | FOXA1 | hsa-miR-30b-5p   | TP53  |
| AR | hsa-miR-19a-3p  | TP53  | hsa-miR-106a-5p | CREB1  | TP53  | FOXP1 | hsa-miR-19a-3p   | TP53  |
| AR | hsa-miR-4742-3p | TLR4  | hsa-miR-106a-5p | SPIB   | IL10  | FOXP1 | hsa-miR-19b-3p   | TGFB1 |
| AR | hsa-miR-2682-5p | HIF1A | hsa-miR-106a-5p | SPIB   | TP53  | FOXP1 | hsa-miR-19b-3p   | TP53  |
| AR | hsa-miR-142-3p  | IL6   | hsa-miR-106a-5p | REST   | TP53  | GABPA | hsa-miR-195-5p   | SMAD3 |
| AR | hsa-miR-6815-3p | HIF1A | hsa-miR-106a-5p | GATA6  | TP53  | GATA1 | hsa-miR-335-5p   | PTGS2 |
| AR | hsa-miR-153-5p  | HIF1A | hsa-miR-106a-5p | NFAT5  | TP53  | GATA1 | hsa-miR-335-5p   | TLR4  |
| AR | hsa-miR-3074-3p | HIF1A | hsa-miR-106a-5p | E2F1   | TP53  | GATA3 | hsa-miR-92a-3p   | NFKB1 |
| AR | hsa-miR-17-5p   | TGFB1 | hsa-miR-106a-5p | TCF7L2 | TP53  | GATA3 | hsa-miR-132-3p   | PTGS2 |
| AR | hsa-miR-17-5p   | TP53  | hsa-miR-106a-5p | RUNX3  | IL10  | GATA6 | hsa-miR-149-3p   | TP53  |
| AR | hsa-miR-17-5p   | HIF1A | hsa-miR-106a-5p | RUNX3  | TP53  | GATA6 | hsa-miR-199b-5p  | HIF1A |
| AR | hsa-miR-17-5p   | SMAD3 | hsa-miR-106a-5p | RUNX1  | TP53  | GATA6 | hsa-miR-7-5p     | TLR4  |
| AR | hsa-let-7a-5p   | IL6   | hsa-miR-106a-5p | NR2C2  | TP53  | GATA6 | hsa-miR-6760-5p  | TP53  |
| AR | hsa-let-7a-5p   | NFKB1 | hsa-miR-106b-5p | CLOCK  | STAT3 | GATA6 | hsa-miR-200a-3p  | TP53  |
| AR | hsa-miR-106a-3p | HIF1A | hsa-miR-106b-5p | SMAD4  | STAT3 | GATA6 | hsa-miR-200a-3p  | SMAD3 |
| AR | hsa-miR-4279    | TLR4  | hsa-miR-106b-5p | SMAD4  | HIF1A | GATA6 | hsa-miR-548ah-5p | HIF1A |
| AR | hsa-miR-4720-3p | STAT3 | hsa-miR-106b-5p | SOX4   | STAT3 | GATA6 | hsa-miR-203a-3p  | IL6   |

|        |                 |       |                 |        |       |       |                 |       |
|--------|-----------------|-------|-----------------|--------|-------|-------|-----------------|-------|
| AR     | hsa-miR-149-5p  | IL6   | hsa-miR-106b-5p | RUNX3  | STAT3 | GATA6 | hsa-let-7b-5p   | PTGS2 |
| AR     | hsa-miR-1-3p    | IL6   | hsa-miR-106b-5p | RUNX3  | HIF1A | GATA6 | hsa-let-7b-5p   | TLR4  |
| AR     | hsa-miR-1-3p    | TLR4  | hsa-miR-106b-5p | AFF1   | HIF1A | GATA6 | hsa-let-7b-5p   | HIF1A |
| AR     | hsa-miR-6837-5p | STAT3 | hsa-miR-106b-5p | EOMES  | STAT3 | GATA6 | hsa-miR-1-3p    | IL6   |
| AR     | hsa-miR-494-3p  | HIF1A | hsa-miR-106b-5p | KLF3   | HIF1A | GATA6 | hsa-miR-1-3p    | TLR4  |
| AR     | hsa-miR-1234-3p | STAT3 | hsa-miR-106b-5p | TCF4   | STAT3 | GATA6 | hsa-miR-4720-3p | STAT3 |
| AR     | hsa-miR-193b-3p | SMAD3 | hsa-miR-106b-5p | TCF4   | HIF1A | GATA6 | hsa-miR-4698    | TLR4  |
| AR     | hsa-miR-30b-5p  | TP53  | hsa-miR-106b-5p | ZBTB7A | STAT3 | GATA6 | hsa-miR-181a-5p | PTGS2 |
| AR     | hsa-miR-21-5p   | TGFB1 | hsa-miR-106b-5p | ZBTB7A | HIF1A | GATA6 | hsa-miR-181a-5p | STAT3 |
| AR     | hsa-miR-21-5p   | TLR4  | hsa-miR-106b-5p | SP4    | STAT3 | GATA6 | hsa-miR-128-3p  | PTGS2 |
| AR     | hsa-miR-21-5p   | HIF1A | hsa-miR-106b-5p | SP4    | HIF1A | GATA6 | hsa-miR-3609    | HIF1A |
| AR     | hsa-miR-21-5p   | NFKB1 | hsa-miR-106b-5p | REST   | STAT3 | HNF4A | hsa-miR-143-3p  | PTGS2 |
| AR     | hsa-miR-211-5p  | TGFB1 | hsa-miR-106b-5p | REST   | HIF1A | HNF4A | hsa-miR-143-3p  | SMAD3 |
| AR     | hsa-miR-199a-5p | NFKB1 | hsa-miR-106b-5p | GATA6  | STAT3 | HNF4A | hsa-miR-6875-3p | STAT3 |
| AR     | hsa-miR-199a-5p | HIF1A | hsa-miR-106b-5p | GATA6  | HIF1A | IRF1  | hsa-miR-142-3p  | IL6   |
| AR     | hsa-miR-24-3p   | TGFB1 | hsa-miR-106b-5p | E2F2   | HIF1A | JUN   | hsa-miR-4720-3p | STAT3 |
| AR     | hsa-miR-20b-5p  | HIF1A | hsa-miR-106b-5p | E2F1   | STAT3 | JUN   | hsa-miR-155-5p  | IL6   |
| AR     | hsa-miR-20a-5p  | TP53  | hsa-miR-106b-5p | E2F1   | HIF1A | JUN   | hsa-miR-155-5p  | NFKB1 |
| AR     | hsa-miR-20a-5p  | HIF1A | hsa-miR-106b-5p | ESR2   | STAT3 | JUN   | hsa-miR-155-5p  | IL2   |
| AR     | hsa-miR-106b-3p | HIF1A | hsa-miR-106b-5p | MXI1   | STAT3 | JUN   | hsa-miR-155-5p  | SMAD3 |
| AR     | hsa-miR-299-5p  | HIF1A | hsa-miR-106b-5p | MXI1   | HIF1A | JUND  | hsa-miR-4271    | TP53  |
| AR     | hsa-miR-7158-5p | STAT3 | hsa-miR-106b-5p | TCF7L2 | STAT3 | JUND  | hsa-miR-663a    | TGFB1 |
| AR     | hsa-miR-106a-5p | IL10  | hsa-miR-106b-5p | TCF7L2 | HIF1A | JUND  | hsa-miR-6875-3p | STAT3 |
| AR     | hsa-miR-106a-5p | TP53  | hsa-miR-106b-5p | HBP1   | STAT3 | JUND  | hsa-miR-1908-5p | PTGS2 |
| ARID3A | hsa-miR-18a-5p  | TP53  | hsa-miR-106b-5p | HBP1   | HIF1A | KLF4  | hsa-miR-107     | HIF1A |
| ARID3A | hsa-miR-18a-5p  | HIF1A | hsa-miR-106b-5p | ELK3   | STAT3 | KLF5  | hsa-miR-9-5p    | NFKB1 |
| ARID3A | hsa-miR-18a-5p  | SMAD3 | hsa-miR-106b-5p | ELK4   | STAT3 | KLF5  | hsa-miR-21-5p   | TGFB1 |
| ARID3A | hsa-miR-16-5p   | NFKB1 | hsa-miR-106b-5p | WHSC1  | STAT3 | KLF5  | hsa-miR-21-5p   | HIF1A |
| ARID3A | hsa-miR-16-5p   | TP53  | hsa-miR-106b-5p | WHSC1  | HIF1A | KLF5  | hsa-miR-21-5p   | NFKB1 |
| ARID3A | hsa-miR-16-5p   | SMAD3 | hsa-miR-107     | ARNT   | IL6   | MAFK  | hsa-miR-15b-5p  | SMAD3 |
| ARID3A | hsa-miR-15b-5p  | SMAD3 | hsa-miR-107     | ARNT   | HIF1A | MAFK  | hsa-miR-16-5p   | PTGS2 |
| ARID3A | hsa-miR-19a-3p  | TP53  | hsa-miR-107     | HIF1A  | IL6   | MAFK  | hsa-miR-16-5p   | TP53  |
| ARID3A | hsa-miR-142-3p  | IL6   | hsa-miR-107     | SALL4  | HIF1A | MAFK  | hsa-miR-16-5p   | SMAD3 |
| ARID3A | hsa-miR-92a-3p  | NFKB1 | hsa-miR-107     | MYB    | HIF1A | MAFK  | hsa-miR-5193    | TP53  |
| ARID3A | hsa-miR-223-3p  | IL6   | hsa-miR-10b-5p  | DLX1   | TP53  | MAFK  | hsa-miR-92b-3p  | SMAD3 |
| ARID3A | hsa-miR-223-3p  | TP53  | hsa-miR-10b-5p  | ASCL2  | TP53  | MAX   | hsa-miR-22-3p   | HIF1A |

|        |                  |       |                 |        |       |       |                  |       |
|--------|------------------|-------|-----------------|--------|-------|-------|------------------|-------|
| ARID3A | hsa-miR-21-5p    | TGFB1 | hsa-miR-10b-5p  | GATA3  | TP53  | MAX   | hsa-miR-320a     | PTGS2 |
| ARID3A | hsa-miR-21-5p    | HIF1A | hsa-miR-10b-5p  | NR2C2  | TP53  | MAX   | hsa-miR-365a-3p  | IL6   |
| ARID3A | hsa-miR-21-5p    | NFKB1 | hsa-miR-10b-5p  | KLF4   | TP53  | MAX   | hsa-miR-193b-3p  | SMAD3 |
| ARID3A | hsa-miR-424-5p   | HIF1A | hsa-miR-10b-5p  | LYL1   | TP53  | MAZ   | hsa-miR-877-3p   | STAT3 |
| ARID3A | hsa-miR-3160-3p  | HIF1A | hsa-miR-10b-5p  | SREBF1 | TP53  | MAZ   | hsa-miR-124-3p   | IL6   |
| ARID3A | hsa-miR-19b-3p   | TGFB1 | hsa-miR-10b-5p  | POU2F2 | TP53  | MAZ   | hsa-miR-124-3p   | PTGS2 |
| ARID3A | hsa-miR-19b-3p   | TP53  | hsa-miR-1178-3p | TP63   | STAT3 | MAZ   | hsa-miR-124-3p   | STAT3 |
| ARID3A | hsa-miR-145-5p   | SMAD3 | hsa-miR-1181    | NKX2-2 | STAT3 | MBD3  | hsa-miR-877-3p   | STAT3 |
| ARID3A | hsa-miR-17-5p    | TGFB1 | hsa-miR-1181    | FOXP1  | STAT3 | MEF2A | hsa-miR-19a-3p   | TNF   |
| ARID3A | hsa-miR-17-5p    | TP53  | hsa-miR-122-5p  | FOXP1  | TGFB1 | MEF2A | hsa-miR-21-5p    | TGFB1 |
| ARID3A | hsa-miR-17-5p    | HIF1A | hsa-miR-122-5p  | SRF    | TGFB1 | MEF2A | hsa-miR-21-5p    | HIF1A |
| ARID3A | hsa-miR-17-5p    | SMAD3 | hsa-miR-122-5p  | ZBTB4  | TGFB1 | MEF2A | hsa-miR-21-5p    | NFKB1 |
| ARID3A | hsa-miR-144-3p   | TGFB1 | hsa-miR-122-5p  | MAZ    | TGFB1 | MEF2A | hsa-miR-155-5p   | NFKB1 |
| ARID3A | hsa-miR-618      | STAT3 | hsa-miR-122-5p  | CREB1  | TGFB1 | MITF  | hsa-miR-101-3p   | PTGS2 |
| ARID3A | hsa-miR-20a-5p   | TP53  | hsa-miR-122-5p  | MAFK   | TGFB1 | MNT   | hsa-miR-17-5p    | TGFB1 |
| ARID3A | hsa-miR-20a-5p   | HIF1A | hsa-miR-122-5p  | UBTF   | TGFB1 | MNT   | hsa-miR-17-5p    | PTGS2 |
| ARID3A | hsa-miR-199b-5p  | HIF1A | hsa-miR-1233-5p | ZMIZ1  | TP53  | MNT   | hsa-miR-17-5p    | HIF1A |
| ARID3A | hsa-miR-155-5p   | IL6   | hsa-miR-1233-5p | E2F3   | TP53  | MNT   | hsa-miR-17-5p    | SMAD3 |
| ARID3A | hsa-miR-155-5p   | NFKB1 | hsa-miR-1233-5p | E2F6   | TP53  | MNT   | hsa-miR-17-5p    | TP53  |
| ARID3A | hsa-miR-155-5p   | SMAD3 | hsa-miR-1234-3p | IRF1   | STAT3 | MXI1  | hsa-miR-20a-5p   | TP53  |
| ARID3A | hsa-miR-92a-1-5p | TP53  | hsa-miR-1234-3p | ESR2   | STAT3 | MXI1  | hsa-miR-20a-5p   | HIF1A |
| ARID3A | hsa-miR-18a-3p   | SMAD3 | hsa-miR-1234-3p | FOS    | STAT3 | MXI1  | hsa-miR-93-5p    | TGFB1 |
| ARNT   | hsa-miR-132-3p   | PTGS2 | hsa-miR-124-3p  | HOXC9  | STAT3 | MXI1  | hsa-miR-93-5p    | STAT3 |
| ARNT   | hsa-miR-149-5p   | IL6   | hsa-miR-124-3p  | NFATC1 | STAT3 | MXI1  | hsa-miR-93-5p    | HIF1A |
| ARNT   | hsa-miR-146a-5p  | PTGS2 | hsa-miR-124-3p  | CLOCK  | IL6   | MYC   | hsa-miR-92a-3p   | NFKB1 |
| ARNT   | hsa-miR-146a-5p  | NFKB1 | hsa-miR-124-3p  | CLOCK  | STAT3 | MYC   | hsa-let-7i-5p    | TLR4  |
| ARNT   | hsa-miR-149-3p   | TP53  | hsa-miR-124-3p  | SNAI2  | PTGS2 | MYC   | hsa-miR-92b-3p   | SMAD3 |
| ARNT   | hsa-miR-24-3p    | TGFB1 | hsa-miR-124-3p  | SNAI2  | STAT3 | MYC   | hsa-miR-106b-5p  | STAT3 |
| ARNT   | hsa-miR-6722-3p  | TP53  | hsa-miR-124-3p  | ELF3   | IL6   | MYC   | hsa-miR-106b-5p  | HIF1A |
| ARNT   | hsa-miR-935      | HIF1A | hsa-miR-124-3p  | XBP1   | STAT3 | MYC   | hsa-miR-744-5p   | PTGS2 |
| ARNT   | hsa-miR-608      | TP53  | hsa-miR-124-3p  | TP63   | PTGS2 | MYC   | hsa-miR-744-5p   | TGFB1 |
| ARNT   | hsa-miR-296-3p   | PTGS2 | hsa-miR-124-3p  | TP63   | STAT3 | MYC   | hsa-miR-92a-1-5p | TP53  |
| ARNT   | hsa-miR-21-5p    | TGFB1 | hsa-miR-124-3p  | CEBPA  | PTGS2 | MYC   | hsa-miR-7-5p     | TLR4  |
| ARNT   | hsa-miR-21-5p    | HIF1A | hsa-miR-124-3p  | CEBPA  | STAT3 | MYC   | hsa-miR-26a-5p   | IL6   |
| ARNT   | hsa-miR-21-5p    | NFKB1 | hsa-miR-124-3p  | STAT3  | IL6   | MYC   | hsa-miR-155-5p   | IL6   |
| ARNT   | hsa-miR-5193     | TP53  | hsa-miR-124-3p  | STAT3  | PTGS2 | MYC   | hsa-miR-155-5p   | NFKB1 |

|       |                 |       |                 |        |       |       |                 |       |
|-------|-----------------|-------|-----------------|--------|-------|-------|-----------------|-------|
| ARNT  | hsa-miR-203a-3p | IL6   | hsa-miR-124-3p  | RARG   | PTGS2 | MYC   | hsa-miR-155-5p  | SMAD3 |
| ARNT  | hsa-let-7b-5p   | PTGS2 | hsa-miR-124-3p  | RARG   | STAT3 | MYC   | hsa-miR-93-5p   | TGFB1 |
| ARNT  | hsa-let-7b-5p   | HIF1A | hsa-miR-124-3p  | EGR2   | PTGS2 | MYC   | hsa-miR-93-5p   | STAT3 |
| ARNT  | hsa-miR-4270    | STAT3 | hsa-miR-124-3p  | EGR2   | STAT3 | MYC   | hsa-miR-93-5p   | HIF1A |
| ARNT  | hsa-miR-124-3p  | IL6   | hsa-miR-124-3p  | KLF4   | STAT3 | MYC   | hsa-miR-320a    | PTGS2 |
| ARNT  | hsa-miR-124-3p  | PTGS2 | hsa-miR-124-3p  | KLF9   | STAT3 | MYC   | hsa-miR-5197-5p | TP53  |
| ARNT  | hsa-miR-124-3p  | STAT3 | hsa-miR-124-3p  | NR3C1  | IL6   | MYC   | hsa-miR-19a-3p  | TNF   |
| ARNT  | hsa-miR-138-5p  | HIF1A | hsa-miR-124-3p  | NR3C1  | PTGS2 | MYC   | hsa-miR-19a-3p  | TP53  |
| ASCL2 | hsa-miR-210-3p  | NFKB1 | hsa-miR-124-3p  | NR3C1  | STAT3 | MYC   | hsa-miR-17-5p   | TGFB1 |
| ASCL2 | hsa-miR-210-3p  | HIF1A | hsa-miR-124-3p  | TFEB   | STAT3 | MYC   | hsa-miR-17-5p   | PTGS2 |
| ASCL2 | hsa-let-7b-5p   | PTGS2 | hsa-miR-124-3p  | SP3    | STAT3 | MYC   | hsa-miR-17-5p   | HIF1A |
| ASCL2 | hsa-let-7b-5p   | HIF1A | hsa-miR-124-3p  | GATA6  | IL6   | MYC   | hsa-miR-17-5p   | SMAD3 |
| ATF1  | hsa-miR-4441    | STAT3 | hsa-miR-124-3p  | GATA6  | PTGS2 | MYC   | hsa-miR-17-5p   | TP53  |
| ATF1  | hsa-miR-155-5p  | IL6   | hsa-miR-124-3p  | GATA6  | STAT3 | MYC   | hsa-let-7a-5p   | IL6   |
| ATF1  | hsa-miR-5702    | TP53  | hsa-miR-124-3p  | PBX1   | STAT3 | MYC   | hsa-let-7a-5p   | PTGS2 |
| ATF2  | hsa-miR-18a-5p  | TP53  | hsa-miR-124-3p  | TFAP4  | STAT3 | MYC   | hsa-let-7a-5p   | NFKB1 |
| ATF2  | hsa-miR-18a-5p  | HIF1A | hsa-miR-124-3p  | RFX1   | PTGS2 | MYC   | hsa-miR-24-3p   | TGFB1 |
| ATF2  | hsa-miR-18a-5p  | SMAD3 | hsa-miR-124-3p  | RFX1   | STAT3 | MYC   | hsa-miR-21-5p   | TGFB1 |
| ATF2  | hsa-miR-9-5p    | NFKB1 | hsa-miR-124-3p  | AHR    | IL6   | MYC   | hsa-miR-21-5p   | TLR4  |
| ATF2  | hsa-miR-20a-5p  | TP53  | hsa-miR-124-3p  | ELK3   | PTGS2 | MYC   | hsa-miR-21-5p   | HIF1A |
| ATF2  | hsa-miR-20a-5p  | HIF1A | hsa-miR-124-3p  | ELK3   | STAT3 | MYC   | hsa-miR-21-5p   | NFKB1 |
| ATF2  | hsa-miR-4720-3p | STAT3 | hsa-miR-124-3p  | MBD3   | PTGS2 | MYC   | hsa-miR-145-5p  | SMAD3 |
| ATF2  | hsa-miR-558     | HIF1A | hsa-miR-124-3p  | MBD3   | STAT3 | MYC   | hsa-miR-449c-5p | HIF1A |
| ATF2  | hsa-miR-625-3p  | HIF1A | hsa-miR-124-3p  | NRF1   | STAT3 | MYC   | hsa-miR-20a-5p  | TP53  |
| ATF2  | hsa-miR-6837-5p | STAT3 | hsa-miR-125a-5p | E2F7   | TP53  | MYC   | hsa-miR-20a-5p  | HIF1A |
| ATF2  | hsa-miR-4748    | HIF1A | hsa-miR-125a-5p | STAT2  | TP53  | NANOG | hsa-miR-145-5p  | SMAD3 |
| ATF2  | hsa-miR-151a-3p | HIF1A | hsa-miR-125a-5p | IRF4   | TP53  | NANOG | hsa-miR-128-3p  | PTGS2 |
| ATF2  | hsa-miR-146a-5p | NFKB1 | hsa-miR-125a-5p | SMAD4  | TP53  | NCOR1 | hsa-let-7b-5p   | PTGS2 |
| ATF2  | hsa-miR-130a-3p | TGFB1 | hsa-miR-125a-5p | REST   | TP53  | NCOR1 | hsa-let-7b-5p   | TLR4  |
| ATF2  | hsa-miR-130a-3p | TNF   | hsa-miR-125a-5p | MYC    | TP53  | NCOR1 | hsa-let-7b-5p   | HIF1A |
| ATF2  | hsa-miR-22-3p   | HIF1A | hsa-miR-1264    | ID2    | TP53  | NFAT5 | hsa-miR-9-5p    | NFKB1 |
| ATF2  | hsa-miR-365a-3p | IL6   | hsa-miR-128-3p  | E2F7   | PTGS2 | NFAT5 | hsa-miR-106b-5p | STAT3 |
| ATF2  | hsa-miR-4470    | HIF1A | hsa-miR-128-3p  | SNAI2  | PTGS2 | NFAT5 | hsa-miR-106b-5p | HIF1A |
| ATF2  | hsa-miR-26a-5p  | IL6   | hsa-miR-128-3p  | HOXA10 | PTGS2 | NFAT5 | hsa-miR-93-5p   | TGFB1 |
| ATF2  | hsa-miR-935     | HIF1A | hsa-miR-128-3p  | RXRA   | PTGS2 | NFAT5 | hsa-miR-93-5p   | STAT3 |
| ATF2  | hsa-miR-19a-3p  | TNF   | hsa-miR-128-3p  | ZFHX3  | PTGS2 | NFAT5 | hsa-miR-93-5p   | HIF1A |



|      |                  |       |                  |        |       |        |                 |       |
|------|------------------|-------|------------------|--------|-------|--------|-----------------|-------|
| ATF2 | hsa-miR-19a-3p   | TP53  | hsa-miR-128-3p   | HOXC6  | PTGS2 | NFIC   | hsa-miR-149-3p  | TP53  |
| ATF2 | hsa-miR-17-5p    | TGFB1 | hsa-miR-128-3p   | NR2F2  | PTGS2 | NFIC   | hsa-miR-210-3p  | NFKB1 |
| ATF2 | hsa-miR-17-5p    | TP53  | hsa-miR-128-3p   | KLF5   | PTGS2 | NFIC   | hsa-miR-210-3p  | HIF1A |
| ATF2 | hsa-miR-17-5p    | HIF1A | hsa-miR-128-3p   | SREBF1 | PTGS2 | NFIC   | hsa-miR-124-3p  | PTGS2 |
| ATF2 | hsa-miR-17-5p    | SMAD3 | hsa-miR-1296-3p  | UBTF   | TP53  | NFIC   | hsa-miR-124-3p  | STAT3 |
| ATF2 | hsa-miR-24-3p    | TGFB1 | hsa-miR-130a-3p  | IRF1   | TGFB1 | NFIC   | hsa-miR-195-5p  | SMAD3 |
| ATF2 | hsa-miR-92a-3p   | NFKB1 | hsa-miR-130a-3p  | YY1    | TGFB1 | NFIC   | hsa-miR-6875-3p | STAT3 |
| ATF2 | hsa-miR-6871-3p  | STAT3 | hsa-miR-130a-3p  | YY1    | TNF   | NR2F2  | hsa-miR-203a-3p | IL6   |
| ATF2 | hsa-miR-93-5p    | TGFB1 | hsa-miR-130a-3p  | ESR1   | TGFB1 | NR2F2  | hsa-miR-150-5p  | TP53  |
| ATF2 | hsa-miR-93-5p    | STAT3 | hsa-miR-130a-3p  | SMAD4  | TGFB1 | NR2F2  | hsa-miR-144-3p  | TGFB1 |
| ATF2 | hsa-miR-93-5p    | HIF1A | hsa-miR-130a-3p  | ZBTB4  | TGFB1 | NR2F2  | hsa-miR-935     | HIF1A |
| ATF2 | hsa-miR-4419a    | TP53  | hsa-miR-130a-3p  | RUNX3  | TGFB1 | NR3C1  | hsa-miR-22-3p   | HIF1A |
| ATF2 | hsa-miR-5193     | TP53  | hsa-miR-130a-3p  | RUNX3  | TNF   | NR3C1  | hsa-miR-19b-3p  | TGFB1 |
| ATF2 | hsa-miR-30e-5p   | TP53  | hsa-miR-130a-3p  | TCF7L2 | TGFB1 | NR3C1  | hsa-miR-19b-3p  | TP53  |
| ATF2 | hsa-miR-663a     | TGFB1 | hsa-miR-130a-3p  | HOXA5  | TGFB1 | NRF1   | hsa-miR-4487    | HIF1A |
| ATF2 | hsa-miR-6760-5p  | TP53  | hsa-miR-130a-3p  | KLF4   | TGFB1 | PAX5   | hsa-miR-153-5p  | HIF1A |
| ATF2 | hsa-miR-98-5p    | IL6   | hsa-miR-130a-3p  | HBP1   | TGFB1 | PAX5   | hsa-miR-4531    | TP53  |
| ATF2 | hsa-miR-6807-3p  | HIF1A | hsa-miR-130b-3p  | TCF4   | STAT3 | POU5F1 | hsa-miR-128-3p  | PTGS2 |
| ATF2 | hsa-miR-6807-5p  | STAT3 | hsa-miR-130b-3p  | NR3C1  | STAT3 | PPARG  | hsa-miR-1-3p    | TLR4  |
| ATF2 | hsa-miR-3662     | HIF1A | hsa-miR-130b-3p  | E2F1   | STAT3 | RCOR1  | hsa-miR-22-3p   | HIF1A |
| ATF2 | hsa-miR-106b-5p  | STAT3 | hsa-miR-130b-3p  | PPARG  | STAT3 | RCOR1  | hsa-miR-26b-5p  | NFKB1 |
| ATF2 | hsa-miR-106b-5p  | HIF1A | hsa-miR-130b-3p  | EGR2   | STAT3 | RCOR1  | hsa-miR-26b-5p  | PTGS2 |
| ATF2 | hsa-miR-124-3p   | IL6   | hsa-miR-130b-3p  | IRF1   | STAT3 | RCOR1  | hsa-miR-26a-5p  | IL6   |
| ATF2 | hsa-miR-124-3p   | STAT3 | hsa-miR-130b-3p  | TCF7L2 | STAT3 | RCOR1  | hsa-miR-155-5p  | IL6   |
| ATF2 | hsa-miR-365a-5p  | STAT3 | hsa-miR-130b-3p  | HBP1   | STAT3 | RCOR1  | hsa-miR-155-5p  | NFKB1 |
| ATF2 | hsa-miR-106b-3p  | HIF1A | hsa-miR-130b-3p  | RUNX3  | STAT3 | RCOR1  | hsa-miR-155-5p  | SMAD3 |
| ATF2 | hsa-miR-1181     | STAT3 | hsa-miR-130b-3p  | KLF9   | STAT3 | RCOR1  | hsa-miR-195-5p  | SMAD3 |
| ATF2 | hsa-miR-92a-1-5p | TP53  | hsa-miR-130b-3p  | ZEB1   | STAT3 | RELA   | hsa-miR-7-5p    | TLR4  |
| ATF2 | hsa-miR-18a-3p   | SMAD3 | hsa-miR-130b-3p  | SOX4   | STAT3 | RELA   | hsa-miR-320a    | PTGS2 |
| ATF3 | hsa-miR-132-3p   | PTGS2 | hsa-miR-130b-3p  | SMAD4  | STAT3 | RELA   | hsa-miR-124-3p  | IL6   |
| ATF3 | hsa-miR-150-5p   | TP53  | hsa-miR-137      | E2F6   | PTGS2 | RELA   | hsa-miR-124-3p  | PTGS2 |
| ATF3 | hsa-miR-6760-5p  | TP53  | hsa-miR-137      | NR3C1  | PTGS2 | RELA   | hsa-miR-124-3p  | STAT3 |
| ATF3 | hsa-miR-4470     | HIF1A | hsa-miR-137      | ESRRA  | PTGS2 | REST   | hsa-miR-124-3p  | IL6   |
| ATF3 | hsa-miR-30b-5p   | TP53  | hsa-miR-137      | NFYB   | PTGS2 | REST   | hsa-miR-124-3p  | PTGS2 |
| ATF3 | hsa-miR-142-3p   | IL6   | hsa-miR-137      | MITF   | PTGS2 | REST   | hsa-miR-124-3p  | STAT3 |
| ATF3 | hsa-miR-4531     | TP53  | hsa-miR-138-2-3p | REST   | STAT3 | REST   | hsa-miR-9-5p    | NFKB1 |

|       |                 |       |                 |         |       |        |                 |       |
|-------|-----------------|-------|-----------------|---------|-------|--------|-----------------|-------|
| ATF3  | hsa-miR-21-5p   | TGFB1 | hsa-miR-138-5p  | NR3C1   | HIF1A | REST   | hsa-miR-4531    | TP53  |
| ATF3  | hsa-miR-21-5p   | HIF1A | hsa-miR-138-5p  | PPARG   | HIF1A | REST   | hsa-miR-17-5p   | TGFB1 |
| ATF3  | hsa-miR-663a    | TGFB1 | hsa-miR-138-5p  | SNAI2   | HIF1A | REST   | hsa-miR-17-5p   | PTGS2 |
| ATF3  | hsa-miR-128-3p  | PTGS2 | hsa-miR-139-5p  | JUN     | NFKB1 | REST   | hsa-miR-17-5p   | HIF1A |
| ATF3  | hsa-miR-155-5p  | IL6   | hsa-miR-139-5p  | FOS     | NFKB1 | REST   | hsa-miR-17-5p   | SMAD3 |
| ATF3  | hsa-miR-320a    | PTGS2 | hsa-miR-1-3p    | SMARCC1 | TLR4  | REST   | hsa-miR-17-5p   | TP53  |
| ATF5  | hsa-miR-18a-5p  | TP53  | hsa-miR-1-3p    | NR5A2   | IL6   | REST   | hsa-miR-4516    | STAT3 |
| ATF5  | hsa-miR-18a-5p  | SMAD3 | hsa-miR-1-3p    | GATA4   | IL6   | REST   | hsa-miR-4516    | TP53  |
| ATF5  | hsa-miR-20a-5p  | TP53  | hsa-miR-1-3p    | GATA4   | TLR4  | REST   | hsa-miR-21-5p   | TGFB1 |
| ATF5  | hsa-miR-17-5p   | PTGS2 | hsa-miR-1-3p    | GATA3   | TLR4  | REST   | hsa-miR-21-5p   | TLR4  |
| ATF5  | hsa-miR-17-5p   | TP53  | hsa-miR-142-3p  | CLOCK   | IL6   | REST   | hsa-miR-21-5p   | HIF1A |
| ATF5  | hsa-miR-17-5p   | SMAD3 | hsa-miR-142-3p  | BACH1   | IL6   | REST   | hsa-miR-21-5p   | NFKB1 |
| ATF5  | hsa-miR-18a-3p  | SMAD3 | hsa-miR-142-3p  | HOXA7   | IL6   | RUNX1  | hsa-miR-128-3p  | PTGS2 |
| ATF5  | hsa-miR-19a-3p  | TP53  | hsa-miR-142-3p  | WIZ     | IL6   | RUNX3  | hsa-miR-4487    | HIF1A |
| ATF5  | hsa-miR-181a-5p | PTGS2 | hsa-miR-143-3p  | NFIC    | PTGS2 | SETDB1 | hsa-miR-92a-3p  | NFKB1 |
| ATOH1 | hsa-miR-106b-5p | STAT3 | hsa-miR-143-3p  | NFIC    | TNF   | SMAD4  | hsa-miR-18a-5p  | TP53  |
| ATOH1 | hsa-miR-106b-5p | HIF1A | hsa-miR-143-3p  | NFIC    | SMAD3 | SMAD4  | hsa-miR-18a-5p  | HIF1A |
| ATOH1 | hsa-miR-106b-3p | HIF1A | hsa-miR-143-3p  | NFYB    | PTGS2 | SMAD4  | hsa-miR-18a-5p  | SMAD3 |
| ATOH1 | hsa-let-7b-5p   | PTGS2 | hsa-miR-143-3p  | NFYB    | TNF   | SMAD4  | hsa-miR-19a-3p  | TP53  |
| ATOH1 | hsa-let-7b-5p   | HIF1A | hsa-miR-143-3p  | NFYB    | SMAD3 | SMAD4  | hsa-miR-19b-3p  | TGFB1 |
| ATOH1 | hsa-miR-93-5p   | TGFB1 | hsa-miR-143-3p  | KLF5    | PTGS2 | SMAD4  | hsa-miR-19b-3p  | TP53  |
| ATOH1 | hsa-miR-93-5p   | STAT3 | hsa-miR-143-3p  | KLF5    | SMAD3 | SMAD4  | hsa-miR-17-5p   | TGFB1 |
| ATOH1 | hsa-miR-93-5p   | HIF1A | hsa-miR-144-3p  | NR3C1   | TGFB1 | SMAD4  | hsa-miR-17-5p   | PTGS2 |
| BACH1 | hsa-miR-132-3p  | PTGS2 | hsa-miR-145-5p  | SMAD4   | SMAD3 | SMAD4  | hsa-miR-17-5p   | HIF1A |
| BACH1 | hsa-miR-150-5p  | TP53  | hsa-miR-145-5p  | KLF5    | SMAD3 | SMAD4  | hsa-miR-17-5p   | SMAD3 |
| BACH1 | hsa-miR-1908-5p | PTGS2 | hsa-miR-145-5p  | POU5F1  | SMAD3 | SMAD4  | hsa-miR-17-5p   | TP53  |
| BACH1 | hsa-miR-365a-5p | STAT3 | hsa-miR-145-5p  | SOX2    | SMAD3 | SMAD4  | hsa-miR-20a-5p  | TP53  |
| BACH1 | hsa-miR-6815-3p | HIF1A | hsa-miR-1468-3p | ETS2    | TLR4  | SMAD4  | hsa-miR-20a-5p  | HIF1A |
| BACH1 | hsa-miR-149-3p  | TP53  | hsa-miR-1468-3p | GATA6   | TLR4  | SNAI2  | hsa-miR-9-5p    | NFKB1 |
| BACH1 | hsa-miR-199b-5p | HIF1A | hsa-miR-146a-5p | SMAD4   | PTGS2 | SOX2   | hsa-miR-21-5p   | NFKB1 |
| BACH1 | hsa-miR-22-3p   | HIF1A | hsa-miR-149-3p  | NFAT5   | TP53  | SOX2   | hsa-miR-21-5p   | HIF1A |
| BACH1 | hsa-miR-365a-3p | IL6   | hsa-miR-149-3p  | E2F1    | TP53  | SOX2   | hsa-miR-1181    | STAT3 |
| BACH1 | hsa-miR-935     | HIF1A | hsa-miR-149-3p  | ASCL2   | TP53  | SP1    | hsa-miR-150-5p  | TP53  |
| BACH1 | hsa-miR-622     | TP53  | hsa-miR-149-3p  | MNT     | TP53  | SP1    | hsa-miR-125a-5p | TP53  |
| BACH1 | hsa-miR-2682-5p | HIF1A | hsa-miR-149-3p  | MAZ     | TP53  | SP1    | hsa-miR-33a-5p  | HIF1A |
| BACH1 | hsa-miR-93-5p   | TGFB1 | hsa-miR-149-3p  | JUN     | TP53  | SP1    | hsa-miR-22-3p   | HIF1A |

|        |                  |       |                |        |       |        |                 |       |
|--------|------------------|-------|----------------|--------|-------|--------|-----------------|-------|
| BACH1  | hsa-miR-93-5p    | STAT3 | hsa-miR-149-3p | FOSL2  | TP53  | SP1    | hsa-miR-124-3p  | PTGS2 |
| BACH1  | hsa-miR-93-5p    | HIF1A | hsa-miR-149-3p | ZFH3   | TP53  | SP1    | hsa-miR-124-3p  | STAT3 |
| BACH1  | hsa-miR-137      | PTGS2 | hsa-miR-149-3p | SREBF1 | TP53  | SP1    | hsa-let-7a-5p   | PTGS2 |
| BACH1  | hsa-miR-149-5p   | IL6   | hsa-miR-149-3p | ZNF250 | TP53  | SP1    | hsa-let-7a-5p   | NFKB1 |
| BACH1  | hsa-miR-17-5p    | PTGS2 | hsa-miR-149-3p | MYBL2  | TP53  | SP1    | hsa-miR-21-5p   | TGFB1 |
| BACH1  | hsa-miR-17-5p    | TGFB1 | hsa-miR-149-3p | HOXB13 | TP53  | SP1    | hsa-miR-21-5p   | HIF1A |
| BACH1  | hsa-miR-17-5p    | HIF1A | hsa-miR-149-5p | JUN    | IL6   | SP1    | hsa-miR-21-5p   | NFKB1 |
| BACH1  | hsa-miR-17-5p    | SMAD3 | hsa-miR-149-5p | FOXO1  | IL6   | SP1    | hsa-miR-145-5p  | SMAD3 |
| BACH1  | hsa-miR-17-5p    | TP53  | hsa-miR-149-5p | HES4   | IL6   | SP1    | hsa-miR-128-3p  | PTGS2 |
| BACH1  | hsa-miR-6755-5p  | HIF1A | hsa-miR-150-5p | THAP1  | TP53  | SPI1   | hsa-miR-9-5p    | NFKB1 |
| BACH1  | hsa-miR-9-5p     | NFKB1 | hsa-miR-150-5p | NKX2-1 | TP53  | SPI1   | hsa-miR-155-5p  | NFKB1 |
| BACH1  | hsa-miR-6875-3p  | STAT3 | hsa-miR-150-5p | EGR2   | TP53  | SPI1   | hsa-miR-155-5p  | IL2   |
| BACH1  | hsa-miR-124-3p   | IL6   | hsa-miR-150-5p | SPIB   | TP53  | SPI1   | hsa-miR-155-5p  | SMAD3 |
| BACH1  | hsa-miR-124-3p   | PTGS2 | hsa-miR-153-5p | NFIC   | HIF1A | SRF    | hsa-miR-9-5p    | NFKB1 |
| BACH1  | hsa-miR-124-3p   | STAT3 | hsa-miR-153-5p | ZBTB7A | HIF1A | SRF    | hsa-miR-1-3p    | IL6   |
| BACH1  | hsa-miR-106b-5p  | STAT3 | hsa-miR-153-5p | FOXG1  | HIF1A | SRF    | hsa-miR-320a    | PTGS2 |
| BACH1  | hsa-miR-106b-5p  | HIF1A | hsa-miR-153-5p | RFX1   | HIF1A | STAT1  | hsa-miR-146a-5p | PTGS2 |
| BACH1  | hsa-miR-106b-3p  | HIF1A | hsa-miR-153-5p | MTA3   | HIF1A | STAT1  | hsa-miR-146a-5p | TLR4  |
| BACH1  | hsa-miR-320a     | PTGS2 | hsa-miR-155-5p | SMAD4  | SMAD3 | STAT1  | hsa-miR-146a-5p | NFKB1 |
| BACH2  | hsa-miR-922      | STAT3 | hsa-miR-155-5p | JUNB   | IL6   | STAT3  | hsa-miR-92a-3p  | NFKB1 |
| BACH2  | hsa-miR-3165     | TP53  | hsa-miR-155-5p | JUNB   | NFKB1 | STAT3  | hsa-miR-17-5p   | PTGS2 |
| BACH2  | hsa-miR-5193     | TP53  | hsa-miR-155-5p | JUNB   | SMAD3 | STAT3  | hsa-miR-155-5p  | IL6   |
| BACH2  | hsa-miR-365a-5p  | STAT3 | hsa-miR-155-5p | SMAD1  | NFKB1 | STAT3  | hsa-miR-155-5p  | NFKB1 |
| BARHL1 | hsa-miR-5692a    | HIF1A | hsa-miR-155-5p | SMAD1  | SMAD3 | STAT3  | hsa-miR-21-5p   | NFKB1 |
| BATF   | hsa-miR-21-5p    | NFKB1 | hsa-miR-155-5p | SMAD2  | IL2   | STAT3  | hsa-miR-21-5p   | TLR4  |
| BATF   | hsa-miR-4270     | STAT3 | hsa-miR-155-5p | SMAD2  | SMAD3 | STAT3  | hsa-miR-106a-5p | IL10  |
| BATF   | hsa-miR-124-3p   | IL6   | hsa-miR-155-5p | MITF   | NFKB1 | STAT5A | hsa-miR-223-3p  | TP53  |
| BATF   | hsa-miR-124-3p   | STAT3 | hsa-miR-155-5p | BACH1  | IL6   | STAT5A | hsa-miR-124-3p  | STAT3 |
| BATF   | hsa-miR-138-2-3p | STAT3 | hsa-miR-155-5p | BACH1  | NFKB1 | TAL1   | hsa-miR-6807-5p | STAT3 |
| BATF   | hsa-miR-155-5p   | IL6   | hsa-miR-155-5p | BACH1  | SMAD3 | TAL1   | hsa-miR-320a    | PTGS2 |
| BATF   | hsa-miR-155-5p   | NFKB1 | hsa-miR-155-5p | VEZF1  | SMAD3 | TAL1   | hsa-miR-223-3p  | IL6   |
| BCL11A | hsa-miR-21-5p    | NFKB1 | hsa-miR-155-5p | KLF9   | NFKB1 | TAL1   | hsa-miR-223-3p  | TP53  |
| BCL11A | hsa-miR-4516     | STAT3 | hsa-miR-155-5p | KLF9   | SMAD3 | TCF12  | hsa-miR-139-5p  | NFKB1 |
| BCL11A | hsa-miR-146a-5p  | NFKB1 | hsa-miR-155-5p | TCF4   | SMAD3 | TCF12  | hsa-miR-155-5p  | IL6   |
| BCL11A | hsa-miR-365a-5p  | STAT3 | hsa-miR-155-5p | NR3C1  | IL6   | TCF12  | hsa-miR-155-5p  | NFKB1 |
| BCL11A | hsa-miR-130a-3p  | TNF   | hsa-miR-155-5p | NR3C1  | SMAD3 | TCF12  | hsa-miR-155-5p  | SMAD3 |

|        |                 |       |                |         |       |        |                  |       |
|--------|-----------------|-------|----------------|---------|-------|--------|------------------|-------|
| BCL6   | hsa-miR-1178-3p | STAT3 | hsa-miR-155-5p | SP1     | NFKB1 | TCF3   | hsa-miR-124-3p   | STAT3 |
| BCL6   | hsa-miR-139-5p  | NFKB1 | hsa-miR-155-5p | SP1     | SMAD3 | TCF7L2 | hsa-miR-193b-3p  | SMAD3 |
| BCL6   | hsa-miR-4799-5p | HIF1A | hsa-miR-155-5p | NFAT5   | NFKB1 | TCF7L2 | hsa-miR-211-5p   | TGFB1 |
| BCL6   | hsa-miR-365a-5p | STAT3 | hsa-miR-155-5p | NFAT5   | SMAD3 | TEAD4  | hsa-miR-181a-5p  | PTGS2 |
| BCL6   | hsa-miR-6809-3p | STAT3 | hsa-miR-155-5p | E2F2    | SMAD3 | TEAD4  | hsa-miR-181a-5p  | STAT3 |
| BCL6   | hsa-miR-630     | TLR4  | hsa-miR-155-5p | MXI1    | IL6   | TP63   | hsa-miR-203a-3p  | TNF   |
| BCL6   | hsa-miR-365a-3p | IL6   | hsa-miR-155-5p | MXI1    | NFKB1 | UBTF   | hsa-miR-6511a-5p | HIF1A |
| BCL6   | hsa-miR-193b-3p | SMAD3 | hsa-miR-155-5p | MXI1    | SMAD3 | UBTF   | hsa-miR-1-3p     | IL6   |
| BCL6   | hsa-miR-3165    | TP53  | hsa-miR-155-5p | HBP1    | IL6   | UBTF   | hsa-miR-1-3p     | TLR4  |
| BCL6   | hsa-miR-548g-3p | TLR4  | hsa-miR-155-5p | HBP1    | NFKB1 | USF2   | hsa-miR-320a     | PTGS2 |
| BCL6   | hsa-miR-6845-3p | STAT3 | hsa-miR-155-5p | HBP1    | SMAD3 | VDR    | hsa-miR-153-5p   | HIF1A |
| BCL6   | hsa-miR-4531    | TP53  | hsa-miR-155-5p | ZKSCAN1 | SMAD3 | VEZF1  | hsa-miR-20a-5p   | TP53  |
| BCL6   | hsa-miR-6815-3p | HIF1A | hsa-miR-155-5p | BCL6    | IL6   | YY1    | hsa-miR-130b-3p  | STAT3 |
| BCL6   | hsa-miR-145-5p  | SMAD3 | hsa-miR-155-5p | BCL6    | NFKB1 | YY1    | hsa-miR-93-5p    | TGFB1 |
| BCL6   | hsa-miR-449c-5p | HIF1A | hsa-miR-155-5p | BCL6    | SMAD3 | YY1    | hsa-miR-93-5p    | STAT3 |
| BCL6   | hsa-miR-6875-3p | STAT3 | hsa-miR-15a-5p | RCOR1   | NFKB1 | YY1    | hsa-miR-93-5p    | HIF1A |
| BCL6   | hsa-miR-1322    | HIF1A | hsa-miR-15a-5p | RCOR1   | TP53  | YY1    | hsa-miR-193b-3p  | SMAD3 |
| BCL6   | hsa-miR-4487    | HIF1A | hsa-miR-15a-5p | RCOR1   | SMAD3 | ZBTB7A | hsa-miR-144-3p   | TGFB1 |
| BCL6   | hsa-miR-92b-3p  | SMAD3 | hsa-miR-15a-5p | MAFK    | TP53  | ZEB1   | hsa-miR-150-5p   | TP53  |
| BCL6   | hsa-miR-922     | STAT3 | hsa-miR-15a-5p | MAFK    | SMAD3 | ZNF217 | hsa-miR-21-5p    | NFKB1 |
| BCL6   | hsa-miR-138-5p  | HIF1A | hsa-miR-15a-5p | TFAP2A  | NFKB1 |        |                  |       |
| BCL6   | hsa-miR-34b-5p  | HIF1A | hsa-miR-15a-5p | TFAP2A  | TP53  |        |                  |       |
| BCL6   | hsa-miR-199b-5p | HIF1A | hsa-miR-15a-5p | BHLHE40 | NFKB1 |        |                  |       |
| BCL6   | hsa-miR-4464    | HIF1A | hsa-miR-15a-5p | BHLHE40 | TP53  |        |                  |       |
| BCLAF1 | hsa-miR-18a-5p  | TP53  | hsa-miR-15a-5p | BHLHE40 | SMAD3 |        |                  |       |
| BCLAF1 | hsa-miR-18a-5p  | HIF1A | hsa-miR-15a-5p | JUN     | NFKB1 |        |                  |       |
| BCLAF1 | hsa-miR-21-5p   | TGFB1 | hsa-miR-15a-5p | JUN     | TP53  |        |                  |       |
| BCLAF1 | hsa-miR-21-5p   | HIF1A | hsa-miR-15a-5p | JUN     | SMAD3 |        |                  |       |
| BCLAF1 | hsa-miR-21-5p   | NFKB1 | hsa-miR-15a-5p | HOXA10  | NFKB1 |        |                  |       |
| BCLAF1 | hsa-miR-124-3p  | IL6   | hsa-miR-15a-5p | HOXA10  | TP53  |        |                  |       |
| BCLAF1 | hsa-miR-124-3p  | STAT3 | hsa-miR-15a-5p | HOXA10  | SMAD3 |        |                  |       |
| BCLAF1 | hsa-miR-625-3p  | HIF1A | hsa-miR-15a-5p | KLF4    | NFKB1 |        |                  |       |
| BCLAF1 | hsa-miR-146a-5p | NFKB1 | hsa-miR-15a-5p | KLF4    | TP53  |        |                  |       |
| BCLAF1 | hsa-miR-20a-5p  | TP53  | hsa-miR-15a-5p | E2F7    | TP53  |        |                  |       |
| BCLAF1 | hsa-miR-20a-5p  | HIF1A | hsa-miR-15a-5p | E2F7    | SMAD3 |        |                  |       |
| BCLAF1 | hsa-miR-19a-3p  | TNF   | hsa-miR-15a-5p | TCF3    | NFKB1 |        |                  |       |

|         |                  |       |                |         |       |
|---------|------------------|-------|----------------|---------|-------|
| BCLAF1  | hsa-miR-19a-3p   | TP53  | hsa-miR-15a-5p | TCF3    | TP53  |
| BCLAF1  | hsa-miR-92a-3p   | NFKB1 | hsa-miR-15a-5p | NR2C2   | TP53  |
| BCLAF1  | hsa-miR-19b-3p   | TGFB1 | hsa-miR-15a-5p | E2F3    | TP53  |
| BCLAF1  | hsa-miR-19b-3p   | TP53  | hsa-miR-15a-5p | NFIC    | NFKB1 |
| BCLAF1  | hsa-miR-92a-1-5p | TP53  | hsa-miR-15a-5p | NFIC    | TP53  |
| BCLAF1  | hsa-miR-663a     | TGFB1 | hsa-miR-15a-5p | NFIC    | SMAD3 |
| BHLHE40 | hsa-miR-139-5p   | NFKB1 | hsa-miR-15a-5p | TP53    | NFKB1 |
| BHLHE40 | hsa-miR-210-3p   | NFKB1 | hsa-miR-15a-5p | TP53    | SMAD3 |
| BHLHE40 | hsa-miR-210-3p   | HIF1A | hsa-miR-15a-5p | IRF4    | NFKB1 |
| BHLHE40 | hsa-miR-7110-3p  | STAT3 | hsa-miR-15a-5p | IRF4    | TP53  |
| BHLHE40 | hsa-miR-942-5p   | TLR4  | hsa-miR-15a-5p | MBD4    | TP53  |
| BHLHE40 | hsa-miR-6809-3p  | STAT3 | hsa-miR-15a-5p | MBD4    | SMAD3 |
| BHLHE40 | hsa-miR-130a-3p  | TGFB1 | hsa-miR-15a-5p | ELK4    | TP53  |
| BHLHE40 | hsa-miR-130a-3p  | TNF   | hsa-miR-15a-5p | GABPA   | NFKB1 |
| BHLHE40 | hsa-miR-7-5p     | TLR4  | hsa-miR-15a-5p | GABPA   | TP53  |
| BHLHE40 | hsa-miR-22-3p    | HIF1A | hsa-miR-15a-5p | GABPA   | SMAD3 |
| BHLHE40 | hsa-miR-193b-3p  | SMAD3 | hsa-miR-15a-5p | ATF2    | NFKB1 |
| BHLHE40 | hsa-miR-4470     | HIF1A | hsa-miR-15a-5p | ATF2    | TP53  |
| BHLHE40 | hsa-miR-3128     | HIF1A | hsa-miR-15a-5p | ATF2    | SMAD3 |
| BHLHE40 | hsa-miR-30b-5p   | TP53  | hsa-miR-15b-5p | NFIC    | SMAD3 |
| BHLHE40 | hsa-miR-4738-3p  | TLR4  | hsa-miR-15b-5p | E2F7    | SMAD3 |
| BHLHE40 | hsa-miR-142-3p   | IL6   | hsa-miR-15b-5p | ZNF217  | SMAD3 |
| BHLHE40 | hsa-miR-223-3p   | IL6   | hsa-miR-15b-5p | MBD4    | SMAD3 |
| BHLHE40 | hsa-miR-223-3p   | TP53  | hsa-miR-15b-5p | BHLHE40 | SMAD3 |
| BHLHE40 | hsa-miR-1322     | HIF1A | hsa-miR-15b-5p | RCOR1   | SMAD3 |
| BHLHE40 | hsa-miR-6815-3p  | HIF1A | hsa-miR-15b-5p | GABPA   | SMAD3 |
| BHLHE40 | hsa-miR-5193     | TP53  | hsa-miR-15b-5p | HOXA10  | SMAD3 |
| BHLHE40 | hsa-miR-30e-5p   | TP53  | hsa-miR-16-5p  | SMAD1   | PTGS2 |
| BHLHE40 | hsa-miR-17-5p    | TGFB1 | hsa-miR-16-5p  | SMAD1   | TP53  |
| BHLHE40 | hsa-miR-17-5p    | TP53  | hsa-miR-16-5p  | SMAD1   | NFKB1 |
| BHLHE40 | hsa-miR-17-5p    | HIF1A | hsa-miR-16-5p  | SMAD1   | SMAD3 |
| BHLHE40 | hsa-miR-17-5p    | SMAD3 | hsa-miR-16-5p  | ZFH3    | PTGS2 |
| BHLHE40 | hsa-miR-6760-5p  | TP53  | hsa-miR-16-5p  | ZFH3    | TP53  |
| BHLHE40 | hsa-let-7i-5p    | TLR4  | hsa-miR-16-5p  | RCOR1   | PTGS2 |
| BHLHE40 | hsa-miR-92b-3p   | SMAD3 | hsa-miR-16-5p  | RCOR1   | TP53  |
| BHLHE40 | hsa-miR-3662     | HIF1A | hsa-miR-16-5p  | RCOR1   | NFKB1 |

|         |                  |       |               |        |       |
|---------|------------------|-------|---------------|--------|-------|
| BHLHE40 | hsa-miR-329-5p   | HIF1A | hsa-miR-16-5p | RCOR1  | SMAD3 |
| BHLHE40 | hsa-miR-124-3p   | IL6   | hsa-miR-16-5p | ZNF384 | TP53  |
| BHLHE40 | hsa-miR-124-3p   | STAT3 | hsa-miR-16-5p | MBD4   | TP53  |
| BHLHE40 | hsa-miR-138-5p   | HIF1A | hsa-miR-16-5p | MBD4   | SMAD3 |
| BHLHE40 | hsa-miR-1181     | STAT3 | hsa-miR-16-5p | TFAP2A | PTGS2 |
| BHLHE40 | hsa-miR-155-5p   | IL6   | hsa-miR-16-5p | TFAP2A | TP53  |
| BHLHE40 | hsa-miR-155-5p   | NFKB1 | hsa-miR-16-5p | TFAP2A | NFKB1 |
| BHLHE40 | hsa-miR-155-5p   | SMAD3 | hsa-miR-16-5p | JUN    | PTGS2 |
| CDX2    | hsa-miR-548ah-5p | HIF1A | hsa-miR-16-5p | JUN    | TP53  |
| CDX2    | hsa-miR-4720-3p  | STAT3 | hsa-miR-16-5p | JUN    | NFKB1 |
| CDX2    | hsa-miR-558      | PTGS2 | hsa-miR-16-5p | JUN    | SMAD3 |
| CDX2    | hsa-miR-558      | HIF1A | hsa-miR-16-5p | HOXA10 | PTGS2 |
| CDX2    | hsa-miR-3934-5p  | PTGS2 | hsa-miR-16-5p | HOXA10 | TP53  |
| CDX2    | hsa-miR-4799-5p  | HIF1A | hsa-miR-16-5p | HOXA10 | NFKB1 |
| CDX2    | hsa-miR-379-3p   | PTGS2 | hsa-miR-16-5p | HOXA10 | SMAD3 |
| CDX2    | hsa-miR-125a-5p  | TP53  | hsa-miR-16-5p | MYC    | PTGS2 |
| CDX2    | hsa-miR-146a-5p  | PTGS2 | hsa-miR-16-5p | MYC    | TP53  |
| CDX2    | hsa-miR-146a-5p  | TLR4  | hsa-miR-16-5p | MYC    | NFKB1 |
| CDX2    | hsa-miR-146a-5p  | NFKB1 | hsa-miR-16-5p | MYC    | SMAD3 |
| CDX2    | hsa-miR-4698     | TLR4  | hsa-miR-16-5p | NFIC   | PTGS2 |
| CDX2    | hsa-miR-1234-3p  | STAT3 | hsa-miR-16-5p | NFIC   | TP53  |
| CDX2    | hsa-miR-130b-3p  | STAT3 | hsa-miR-16-5p | NFIC   | NFKB1 |
| CDX2    | hsa-miR-214-3p   | TP53  | hsa-miR-16-5p | NFIC   | SMAD3 |
| CDX2    | hsa-let-7b-5p    | PTGS2 | hsa-miR-16-5p | TCF3   | NFKB1 |
| CDX2    | hsa-let-7b-5p    | TLR4  | hsa-miR-16-5p | TCF3   | TP53  |
| CDX2    | hsa-let-7b-5p    | HIF1A | hsa-miR-16-5p | SP1    | PTGS2 |
| CDX2    | hsa-miR-24-3p    | TGFB1 | hsa-miR-16-5p | SP1    | TP53  |
| CDX2    | hsa-miR-5581-3p  | STAT3 | hsa-miR-16-5p | SP1    | NFKB1 |
| CDX2    | hsa-miR-6845-3p  | STAT3 | hsa-miR-16-5p | SP1    | SMAD3 |
| CDX2    | hsa-miR-299-5p   | HIF1A | hsa-miR-16-5p | NR2C2  | TP53  |
| CDX2    | hsa-miR-33a-5p   | HIF1A | hsa-miR-16-5p | E2F3   | TP53  |
| CDX2    | hsa-miR-93-5p    | TGFB1 | hsa-miR-16-5p | E2F7   | PTGS2 |
| CDX2    | hsa-miR-93-5p    | STAT3 | hsa-miR-16-5p | E2F7   | TP53  |
| CDX2    | hsa-miR-93-5p    | HIF1A | hsa-miR-16-5p | E2F7   | SMAD3 |
| CDX2    | hsa-miR-4438     | STAT3 | hsa-miR-16-5p | TP53   | PTGS2 |
| CDX2    | hsa-miR-29b-3p   | TGFB1 | hsa-miR-16-5p | TP53   | NFKB1 |

|       |                  |       |               |         |       |
|-------|------------------|-------|---------------|---------|-------|
| CDX2  | hsa-miR-494-3p   | HIF1A | hsa-miR-16-5p | TP53    | SMAD3 |
| CDX2  | hsa-miR-211-5p   | TGFB1 | hsa-miR-16-5p | TFAP4   | NFKB1 |
| CDX2  | hsa-miR-874-3p   | STAT3 | hsa-miR-16-5p | IRF4    | NFKB1 |
| CDX2  | hsa-miR-1-3p     | TLR4  | hsa-miR-16-5p | IRF4    | TP53  |
| CDX2  | hsa-miR-3160-3p  | HIF1A | hsa-miR-16-5p | TBP     | PTGS2 |
| CDX2  | hsa-miR-526b-5p  | TLR4  | hsa-miR-16-5p | TBP     | TP53  |
| CDX2  | hsa-miR-371b-3p  | STAT3 | hsa-miR-16-5p | TBP     | NFKB1 |
| CDX2  | hsa-miR-4290     | SMAD3 | hsa-miR-16-5p | TBP     | SMAD3 |
| CDX2  | hsa-miR-6893-5p  | HIF1A | hsa-miR-16-5p | BHLHE40 | NFKB1 |
| CDX2  | hsa-miR-128-3p   | PTGS2 | hsa-miR-16-5p | BHLHE40 | TP53  |
| CDX2  | hsa-miR-30d-5p   | TP53  | hsa-miR-16-5p | BHLHE40 | SMAD3 |
| CDX2  | hsa-miR-3658     | TLR4  | hsa-miR-16-5p | ELK4    | PTGS2 |
| CDX2  | hsa-miR-4735-3p  | HIF1A | hsa-miR-16-5p | ELK4    | TP53  |
| CDX2  | hsa-miR-4684-5p  | STAT3 | hsa-miR-16-5p | GABPA   | PTGS2 |
| CDX2  | hsa-miR-589-5p   | PTGS2 | hsa-miR-16-5p | GABPA   | TP53  |
| CDX2  | hsa-miR-4659a-3p | TLR4  | hsa-miR-16-5p | GABPA   | NFKB1 |
| CDX2  | hsa-miR-940      | HIF1A | hsa-miR-16-5p | GABPA   | SMAD3 |
| CDX2  | hsa-miR-106b-3p  | HIF1A | hsa-miR-17-5p | CLOCK   | TP53  |
| CDX2  | hsa-miR-4271     | TP53  | hsa-miR-17-5p | CLOCK   | SMAD3 |
| CDX2  | hsa-miR-200a-3p  | TP53  | hsa-miR-17-5p | HIF1A   | TGFB1 |
| CDX2  | hsa-miR-200a-3p  | SMAD3 | hsa-miR-17-5p | HIF1A   | PTGS2 |
| CDX2  | hsa-miR-4659b-3p | TLR4  | hsa-miR-17-5p | ZBTB7A  | TGFB1 |
| CDX2  | hsa-miR-6837-5p  | STAT3 | hsa-miR-17-5p | ZBTB7A  | HIF1A |
| CDX2  | hsa-miR-106b-5p  | STAT3 | hsa-miR-17-5p | ZBTB7A  | SMAD3 |
| CDX2  | hsa-miR-106b-5p  | HIF1A | hsa-miR-17-5p | SOX4    | PTGS2 |
| CDX2  | hsa-miR-4279     | TLR4  | hsa-miR-17-5p | AFF1    | HIF1A |
| CDX2  | hsa-miR-5197-5p  | TP53  | hsa-miR-17-5p | KLF3    | HIF1A |
| CDX2  | hsa-miR-107      | HIF1A | hsa-miR-17-5p | TCF4    | TGFB1 |
| CDX2  | hsa-miR-744-5p   | PTGS2 | hsa-miR-17-5p | TCF4    | TP53  |
| CDX2  | hsa-miR-744-5p   | TGFB1 | hsa-miR-17-5p | TCF4    | HIF1A |
| CDX2  | hsa-miR-4682     | TP53  | hsa-miR-17-5p | TCF4    | SMAD3 |
| CEBPA | hsa-miR-379-3p   | PTGS2 | hsa-miR-17-5p | TFAM    | SMAD3 |
| CEBPA | hsa-miR-193b-3p  | SMAD3 | hsa-miR-17-5p | TCF3    | TGFB1 |
| CEBPA | hsa-miR-4768-5p  | STAT3 | hsa-miR-17-5p | TCF3    | TP53  |
| CEBPA | hsa-let-7a-5p    | PTGS2 | hsa-miR-17-5p | TCF3    | HIF1A |
| CEBPA | hsa-miR-4270     | STAT3 | hsa-miR-17-5p | ZBTB4   | TGFB1 |

|       |                 |       |               |       |       |
|-------|-----------------|-------|---------------|-------|-------|
| CEBPA | hsa-miR-4684-5p | STAT3 | hsa-miR-17-5p | SP4   | TGFB1 |
| CEBPB | hsa-miR-3165    | TP53  | hsa-miR-17-5p | SP4   | TP53  |
| CEBPB | hsa-miR-558     | PTGS2 | hsa-miR-17-5p | SP4   | HIF1A |
| CEBPB | hsa-miR-558     | HIF1A | hsa-miR-17-5p | NR2C2 | TP53  |
| CEBPB | hsa-miR-210-3p  | NFKB1 | hsa-miR-17-5p | CREB1 | TGFB1 |
| CEBPB | hsa-miR-210-3p  | HIF1A | hsa-miR-17-5p | CREB1 | PTGS2 |
| CEBPB | hsa-miR-150-5p  | TP53  | hsa-miR-17-5p | CREB1 | HIF1A |
| CEBPB | hsa-miR-379-3p  | PTGS2 | hsa-miR-17-5p | CREB1 | SMAD3 |
| CEBPB | hsa-miR-4684-5p | STAT3 | hsa-miR-17-5p | CREB1 | TP53  |
| CEBPB | hsa-miR-130b-3p | STAT3 | hsa-miR-17-5p | GATA6 | TGFB1 |
| CEBPB | hsa-miR-143-3p  | PTGS2 | hsa-miR-17-5p | GATA6 | PTGS2 |
| CEBPB | hsa-miR-143-3p  | TNF   | hsa-miR-17-5p | GATA6 | HIF1A |
| CEBPB | hsa-miR-143-3p  | SMAD3 | hsa-miR-17-5p | GATA6 | SMAD3 |
| CEBPB | hsa-miR-296-3p  | PTGS2 | hsa-miR-17-5p | GATA6 | TP53  |
| CEBPB | hsa-miR-22-3p   | HIF1A | hsa-miR-17-5p | TP53  | TGFB1 |
| CEBPB | hsa-miR-4470    | HIF1A | hsa-miR-17-5p | TP53  | PTGS2 |
| CEBPB | hsa-miR-484     | IL2   | hsa-miR-17-5p | TP53  | SMAD3 |
| CEBPB | hsa-miR-146b-5p | NFKB1 | hsa-miR-17-5p | E2F2  | PTGS2 |
| CEBPB | hsa-miR-4270    | STAT3 | hsa-miR-17-5p | E2F2  | TP53  |
| CEBPB | hsa-miR-199a-3p | PTGS2 | hsa-miR-17-5p | E2F2  | HIF1A |
| CEBPB | hsa-miR-144-3p  | TGFB1 | hsa-miR-17-5p | E2F2  | SMAD3 |
| CEBPB | hsa-miR-6755-5p | HIF1A | hsa-miR-17-5p | ETV1  | TGFB1 |
| CEBPB | hsa-miR-92b-3p  | SMAD3 | hsa-miR-17-5p | ETV1  | TP53  |
| CEBPB | hsa-miR-124-3p  | IL6   | hsa-miR-17-5p | ETV1  | HIF1A |
| CEBPB | hsa-miR-124-3p  | PTGS2 | hsa-miR-17-5p | ETV1  | PTGS2 |
| CEBPB | hsa-miR-124-3p  | STAT3 | hsa-miR-17-5p | NFAT5 | TGFB1 |
| CEBPB | hsa-miR-106b-5p | STAT3 | hsa-miR-17-5p | NFAT5 | PTGS2 |
| CEBPB | hsa-miR-106b-5p | HIF1A | hsa-miR-17-5p | NFAT5 | HIF1A |
| CEBPB | hsa-miR-181c-5p | IL2   | hsa-miR-17-5p | NFAT5 | SMAD3 |
| CEBPB | hsa-miR-199b-5p | HIF1A | hsa-miR-17-5p | NFAT5 | TP53  |
| CEBPB | hsa-miR-101-3p  | PTGS2 | hsa-miR-17-5p | E2F3  | TP53  |
| CEBPB | hsa-miR-18a-3p  | SMAD3 | hsa-miR-17-5p | E2F3  | HIF1A |
| CEBPB | hsa-miR-4799-5p | HIF1A | hsa-miR-17-5p | E2F1  | PTGS2 |
| CEBPB | hsa-miR-4282    | HIF1A | hsa-miR-17-5p | E2F1  | TP53  |
| CEBPB | hsa-miR-24-3p   | TGFB1 | hsa-miR-17-5p | E2F1  | HIF1A |
| CEBPB | hsa-miR-26a-5p  | IL6   | hsa-miR-17-5p | E2F1  | SMAD3 |



|       |                 |       |                 |        |       |
|-------|-----------------|-------|-----------------|--------|-------|
| CEBPB | hsa-miR-3128    | HIF1A | hsa-miR-17-5p   | WHSC1  | TP53  |
| CEBPB | hsa-miR-324-3p  | TGFB1 | hsa-miR-17-5p   | WHSC1  | HIF1A |
| CEBPB | hsa-miR-93-5p   | TGFB1 | hsa-miR-17-5p   | TCF7L2 | TGFB1 |
| CEBPB | hsa-miR-93-5p   | STAT3 | hsa-miR-17-5p   | TCF7L2 | PTGS2 |
| CEBPB | hsa-miR-93-5p   | HIF1A | hsa-miR-17-5p   | TCF7L2 | HIF1A |
| CEBPB | hsa-miR-5702    | TP53  | hsa-miR-17-5p   | TCF7L2 | SMAD3 |
| CEBPB | hsa-miR-137     | PTGS2 | hsa-miR-17-5p   | TCF7L2 | TP53  |
| CEBPB | hsa-miR-19b-3p  | TGFB1 | hsa-miR-17-5p   | HBP1   | PTGS2 |
| CEBPB | hsa-miR-19b-3p  | TP53  | hsa-miR-17-5p   | HBP1   | SMAD3 |
| CEBPB | hsa-miR-589-5p  | PTGS2 | hsa-miR-17-5p   | HBP1   | HIF1A |
| CEBPB | hsa-miR-6789-3p | STAT3 | hsa-miR-17-5p   | HBP1   | TGFB1 |
| CEBPB | hsa-miR-1322    | HIF1A | hsa-miR-17-5p   | SPIB   | TP53  |
| CEBPB | hsa-miR-6875-3p | STAT3 | hsa-miR-17-5p   | RUNX3  | PTGS2 |
| CEBPB | hsa-miR-200a-3p | TP53  | hsa-miR-17-5p   | RUNX3  | TP53  |
| CEBPB | hsa-miR-200a-3p | SMAD3 | hsa-miR-17-5p   | RUNX3  | HIF1A |
| CEBPB | hsa-miR-138-5p  | HIF1A | hsa-miR-17-5p   | RUNX3  | TGFB1 |
| CEBPB | hsa-miR-5197-5p | TP53  | hsa-miR-17-5p   | RUNX1  | PTGS2 |
| CEBPB | hsa-miR-34b-5p  | HIF1A | hsa-miR-17-5p   | RUNX1  | TP53  |
| CEBPB | hsa-miR-320a    | PTGS2 | hsa-miR-17-5p   | RUNX1  | HIF1A |
| CEBPB | hsa-miR-18a-5p  | TP53  | hsa-miR-17-5p   | RUNX1  | TGFB1 |
| CEBPB | hsa-miR-18a-5p  | HIF1A | hsa-miR-17-5p   | ELK4   | PTGS2 |
| CEBPB | hsa-miR-18a-5p  | SMAD3 | hsa-miR-17-5p   | ELK4   | TP53  |
| CEBPB | hsa-miR-9-5p    | NFKB1 | hsa-miR-17-5p   | MXI1   | TGFB1 |
| CEBPB | hsa-miR-625-3p  | HIF1A | hsa-miR-17-5p   | MXI1   | PTGS2 |
| CEBPB | hsa-miR-1908-5p | PTGS2 | hsa-miR-17-5p   | MXI1   | HIF1A |
| CEBPB | hsa-miR-5193    | TP53  | hsa-miR-17-5p   | MXI1   | SMAD3 |
| CEBPB | hsa-miR-6809-3p | STAT3 | hsa-miR-17-5p   | MXI1   | TP53  |
| CEBPB | hsa-miR-19a-3p  | TNF   | hsa-miR-17-5p   | ATF3   | PTGS2 |
| CEBPB | hsa-miR-19a-3p  | TP53  | hsa-miR-17-5p   | ATF3   | TP53  |
| CEBPB | hsa-miR-6760-5p | TP53  | hsa-miR-17-5p   | ATF3   | HIF1A |
| CEBPB | hsa-miR-365a-3p | IL6   | hsa-miR-17-5p   | ATF3   | TGFB1 |
| CEBPB | hsa-miR-935     | HIF1A | hsa-miR-181a-5p | CDX2   | PTGS2 |
| CEBPB | hsa-miR-454-3p  | TP53  | hsa-miR-181a-5p | CDX2   | STAT3 |
| CEBPB | hsa-miR-2682-5p | HIF1A | hsa-miR-181a-5p | NFYB   | PTGS2 |
| CEBPB | hsa-miR-142-3p  | IL6   | hsa-miR-181a-5p | NFYB   | STAT3 |
| CEBPB | hsa-miR-6815-3p | HIF1A | hsa-miR-181a-5p | RCOR1  | PTGS2 |

|       |                  |       |                 |       |       |
|-------|------------------|-------|-----------------|-------|-------|
| CEBPB | hsa-miR-30e-5p   | TP53  | hsa-miR-181a-5p | RCOR1 | STAT3 |
| CEBPB | hsa-miR-17-5p    | TGFB1 | hsa-miR-181a-5p | OTX2  | PTGS2 |
| CEBPB | hsa-miR-17-5p    | PTGS2 | hsa-miR-181a-5p | OTX2  | STAT3 |
| CEBPB | hsa-miR-17-5p    | HIF1A | hsa-miR-181a-5p | STAT3 | PTGS2 |
| CEBPB | hsa-miR-17-5p    | SMAD3 | hsa-miR-181a-5p | PBX3  | STAT3 |
| CEBPB | hsa-miR-17-5p    | TP53  | hsa-miR-181a-5p | ETS1  | PTGS2 |
| CEBPB | hsa-let-7a-5p    | IL6   | hsa-miR-181a-5p | ETS1  | STAT3 |
| CEBPB | hsa-let-7a-5p    | PTGS2 | hsa-miR-181a-5p | TCF21 | PTGS2 |
| CEBPB | hsa-let-7a-5p    | NFKB1 | hsa-miR-181a-5p | FOS   | PTGS2 |
| CEBPB | hsa-miR-6872-3p  | STAT3 | hsa-miR-181a-5p | FOS   | STAT3 |
| CEBPB | hsa-miR-365a-5p  | STAT3 | hsa-miR-181a-5p | ZNF83 | STAT3 |
| CEBPB | hsa-miR-1181     | STAT3 | hsa-miR-181a-5p | SNAI2 | PTGS2 |
| CEBPB | hsa-miR-424-5p   | HIF1A | hsa-miR-181a-5p | SNAI2 | STAT3 |
| CEBPB | hsa-miR-138-2-3p | STAT3 | hsa-miR-181a-5p | WHSC1 | STAT3 |
| CEBPB | hsa-miR-100-5p   | PTGS2 | hsa-miR-181a-5p | MAZ   | PTGS2 |
| CEBPB | hsa-miR-193b-3p  | SMAD3 | hsa-miR-181a-5p | MAZ   | STAT3 |
| CEBPB | hsa-miR-4516     | STAT3 | hsa-miR-181a-5p | ELK4  | PTGS2 |
| CEBPB | hsa-miR-4516     | TP53  | hsa-miR-181a-5p | ELK4  | STAT3 |
| CEBPB | hsa-miR-21-5p    | TGFB1 | hsa-miR-181a-5p | KDM5A | PTGS2 |
| CEBPB | hsa-miR-21-5p    | HIF1A | hsa-miR-181a-5p | KDM5A | STAT3 |
| CEBPB | hsa-miR-21-5p    | NFKB1 | hsa-miR-18a-3p  | NFIC  | SMAD3 |
| CEBPB | hsa-miR-211-5p   | TGFB1 | hsa-miR-18a-3p  | UBTF  | SMAD3 |
| CEBPB | hsa-miR-199a-5p  | PTGS2 | hsa-miR-18a-3p  | SRF   | SMAD3 |
| CEBPB | hsa-miR-199a-5p  | HIF1A | hsa-miR-18a-5p  | IRF2  | TP53  |
| CEBPB | hsa-miR-199a-5p  | NFKB1 | hsa-miR-18a-5p  | IRF2  | HIF1A |
| CEBPB | hsa-miR-145-5p   | SMAD3 | hsa-miR-18a-5p  | NR3C1 | TP53  |
| CEBPB | hsa-miR-449c-5p  | HIF1A | hsa-miR-18a-5p  | NR3C1 | HIF1A |
| CEBPB | hsa-let-7b-5p    | PTGS2 | hsa-miR-18a-5p  | NR3C1 | SMAD3 |
| CEBPB | hsa-let-7b-5p    | HIF1A | hsa-miR-18a-5p  | TP53  | SMAD3 |
| CEBPB | hsa-miR-3609     | HIF1A | hsa-miR-18a-5p  | ETS2  | TP53  |
| CEBPB | hsa-miR-20a-5p   | TP53  | hsa-miR-18a-5p  | ETS2  | HIF1A |
| CEBPB | hsa-miR-20a-5p   | HIF1A | hsa-miR-18a-5p  | ETS2  | SMAD3 |
| CEBPB | hsa-miR-106b-3p  | HIF1A | hsa-miR-18a-5p  | SMAD2 | SMAD3 |
| CEBPB | hsa-miR-7158-5p  | STAT3 | hsa-miR-18a-5p  | GABPA | TP53  |
| CEBPB | hsa-miR-107      | IL6   | hsa-miR-18a-5p  | GABPA | HIF1A |
| CEBPB | hsa-miR-107      | HIF1A | hsa-miR-18a-5p  | GABPA | SMAD3 |

|       |                 |       |                 |        |       |
|-------|-----------------|-------|-----------------|--------|-------|
| CEBPD | hsa-miR-618     | STAT3 | hsa-miR-18b-5p  | IRF2   | HIF1A |
| CEBPD | hsa-miR-4487    | HIF1A | hsa-miR-18b-5p  | ESR1   | HIF1A |
| CEBPD | hsa-miR-200a-3p | TP53  | hsa-miR-18b-5p  | CUX1   | HIF1A |
| CEBPD | hsa-miR-200a-3p | SMAD3 | hsa-miR-1908-5p | BARHL1 | PTGS2 |
| CEBPD | hsa-miR-210-3p  | HIF1A | hsa-miR-1910-3p | AR     | HIF1A |
| CEBPD | hsa-miR-150-5p  | TP53  | hsa-miR-193b-3p | E2F6   | SMAD3 |
| CEBPD | hsa-miR-145-5p  | SMAD3 | hsa-miR-193b-3p | IRF1   | SMAD3 |
| CEBPD | hsa-miR-4441    | STAT3 | hsa-miR-193b-3p | E2F2   | SMAD3 |
| CEBPD | hsa-miR-5193    | TP53  | hsa-miR-193b-3p | E2F1   | SMAD3 |
| CEBPD | hsa-miR-663a    | TGFB1 | hsa-miR-193b-3p | MAZ    | SMAD3 |
| CLOCK | hsa-miR-18a-5p  | TP53  | hsa-miR-193b-3p | TEAD2  | SMAD3 |
| CLOCK | hsa-miR-18a-5p  | SMAD3 | hsa-miR-193b-3p | DLX1   | SMAD3 |
| CLOCK | hsa-miR-18a-3p  | SMAD3 | hsa-miR-195-5p  | E2F7   | SMAD3 |
| CLOCK | hsa-miR-5702    | TP53  | hsa-miR-195-5p  | MBD4   | SMAD3 |
| CREB1 | hsa-miR-132-3p  | PTGS2 | hsa-miR-195-5p  | MAFK   | SMAD3 |
| CREB1 | hsa-miR-210-3p  | NFKB1 | hsa-miR-195-5p  | HOXA10 | SMAD3 |
| CREB1 | hsa-miR-210-3p  | HIF1A | hsa-miR-199a-3p | E2F2   | PTGS2 |
| CREB1 | hsa-miR-150-5p  | TP53  | hsa-miR-199a-3p | ETS2   | PTGS2 |
| CREB1 | hsa-miR-1908-5p | PTGS2 | hsa-miR-199a-5p | E2F3   | HIF1A |
| CREB1 | hsa-miR-365a-5p | STAT3 | hsa-miR-199a-5p | SMAD4  | PTGS2 |
| CREB1 | hsa-let-7b-5p   | PTGS2 | hsa-miR-199a-5p | SMAD4  | HIF1A |
| CREB1 | hsa-let-7b-5p   | HIF1A | hsa-miR-199a-5p | JUNB   | NFKB1 |
| CREB1 | hsa-miR-33a-5p  | HIF1A | hsa-miR-199a-5p | JUNB   | HIF1A |
| CREB1 | hsa-miR-6809-3p | STAT3 | hsa-miR-199a-5p | HIF1A  | PTGS2 |
| CREB1 | hsa-miR-1181    | STAT3 | hsa-miR-199a-5p | HIF1A  | NFKB1 |
| CREB1 | hsa-miR-22-3p   | HIF1A | hsa-miR-199a-5p | ETS2   | PTGS2 |
| CREB1 | hsa-miR-193b-3p | SMAD3 | hsa-miR-199a-5p | ETS2   | HIF1A |
| CREB1 | hsa-miR-935     | HIF1A | hsa-miR-199a-5p | ETS2   | NFKB1 |
| CREB1 | hsa-miR-2682-5p | HIF1A | hsa-miR-199a-5p | GATA6  | PTGS2 |
| CREB1 | hsa-miR-155-5p  | NFKB1 | hsa-miR-199a-5p | GATA6  | HIF1A |
| CREB1 | hsa-miR-155-5p  | SMAD3 | hsa-miR-199a-5p | GATA6  | NFKB1 |
| CREB1 | hsa-miR-4531    | TP53  | hsa-miR-199a-5p | MAFB   | PTGS2 |
| CREB1 | hsa-miR-21-5p   | TGFB1 | hsa-miR-199a-5p | MAFB   | HIF1A |
| CREB1 | hsa-miR-21-5p   | HIF1A | hsa-miR-199b-5p | HES1   | HIF1A |
| CREB1 | hsa-miR-21-5p   | NFKB1 | hsa-miR-199b-5p | E2F3   | HIF1A |
| CREB1 | hsa-miR-6815-3p | HIF1A | hsa-miR-19a-3p  | YY1    | TNF   |

|       |                 |       |                 |       |       |
|-------|-----------------|-------|-----------------|-------|-------|
| CREB1 | hsa-miR-137     | PTGS2 | hsa-miR-19a-3p  | YY1   | TP53  |
| CREB1 | hsa-miR-449c-5p | HIF1A | hsa-miR-19a-3p  | RCOR1 | TNF   |
| CREB1 | hsa-miR-24-3p   | TGFB1 | hsa-miR-19a-3p  | RCOR1 | TP53  |
| CREB1 | hsa-miR-663a    | TGFB1 | hsa-miR-19a-3p  | E2F8  | TP53  |
| CREB1 | hsa-miR-6872-3p | STAT3 | hsa-miR-19a-3p  | IKZF1 | TNF   |
| CREB1 | hsa-miR-6789-3p | STAT3 | hsa-miR-19a-3p  | MXD1  | TP53  |
| CREB1 | hsa-miR-6875-3p | STAT3 | hsa-miR-19a-3p  | MBD4  | TP53  |
| CREB1 | hsa-miR-3662    | HIF1A | hsa-miR-19a-3p  | MBD3  | TNF   |
| CREB1 | hsa-miR-124-3p  | PTGS2 | hsa-miR-19a-3p  | MBD3  | TP53  |
| CREB1 | hsa-miR-124-3p  | STAT3 | hsa-miR-19b-3p  | YY1   | TGFB1 |
| CREB1 | hsa-miR-106b-3p | HIF1A | hsa-miR-19b-3p  | YY1   | TP53  |
| CREB1 | hsa-miR-92b-3p  | SMAD3 | hsa-miR-19b-3p  | CLOCK | TP53  |
| CREB1 | hsa-miR-320a    | PTGS2 | hsa-miR-19b-3p  | RCOR1 | TGFB1 |
| CTCF  | hsa-miR-1178-3p | STAT3 | hsa-miR-19b-3p  | RCOR1 | TP53  |
| CTCF  | hsa-miR-3165    | TP53  | hsa-miR-19b-3p  | MYBL2 | TGFB1 |
| CTCF  | hsa-miR-558     | PTGS2 | hsa-miR-19b-3p  | MYBL2 | TP53  |
| CTCF  | hsa-miR-558     | HIF1A | hsa-miR-19b-3p  | MEF2A | TGFB1 |
| CTCF  | hsa-miR-3934-5p | PTGS2 | hsa-miR-19b-3p  | MXD1  | TP53  |
| CTCF  | hsa-miR-513b-3p | TP53  | hsa-miR-19b-3p  | TCF4  | TGFB1 |
| CTCF  | hsa-miR-210-3p  | FOXP3 | hsa-miR-19b-3p  | TCF4  | TP53  |
| CTCF  | hsa-miR-210-3p  | HIF1A | hsa-miR-19b-3p  | ZBTB4 | TGFB1 |
| CTCF  | hsa-miR-210-3p  | NFKB1 | hsa-miR-19b-3p  | CREB1 | TGFB1 |
| CTCF  | hsa-miR-150-5p  | TP53  | hsa-miR-19b-3p  | CREB1 | TP53  |
| CTCF  | hsa-miR-379-3p  | PTGS2 | hsa-miR-19b-3p  | GMEB2 | TGFB1 |
| CTCF  | hsa-miR-5094    | HIF1A | hsa-miR-19b-3p  | GMEB2 | TP53  |
| CTCF  | hsa-miR-5095    | STAT3 | hsa-miR-19b-3p  | TP53  | TGFB1 |
| CTCF  | hsa-miR-4684-5p | STAT3 | hsa-miR-19b-3p  | E2F8  | TP53  |
| CTCF  | hsa-miR-130b-3p | STAT3 | hsa-miR-19b-3p  | MBD4  | TP53  |
| CTCF  | hsa-miR-18b-5p  | HIF1A | hsa-miR-19b-3p  | HOXA5 | TGFB1 |
| CTCF  | hsa-miR-576-3p  | HIF1A | hsa-miR-19b-3p  | MBD3  | TGFB1 |
| CTCF  | hsa-miR-877-3p  | STAT3 | hsa-miR-19b-3p  | MBD3  | TP53  |
| CTCF  | hsa-miR-942-5p  | TLR4  | hsa-miR-19b-3p  | HBP1  | TGFB1 |
| CTCF  | hsa-miR-143-3p  | PTGS2 | hsa-miR-200a-3p | SRF   | TP53  |
| CTCF  | hsa-miR-143-3p  | TNF   | hsa-miR-200a-3p | SRF   | SMAD3 |
| CTCF  | hsa-miR-143-3p  | SMAD3 | hsa-miR-200a-3p | TP53  | SMAD3 |
| CTCF  | hsa-miR-214-3p  | TP53  | hsa-miR-200a-3p | SMAD2 | SMAD3 |

|      |                  |       |                 |        |       |
|------|------------------|-------|-----------------|--------|-------|
| CTCF | hsa-miR-296-3p   | PTGS2 | hsa-miR-200a-3p | TFAM   | SMAD3 |
| CTCF | hsa-miR-22-3p    | HIF1A | hsa-miR-200a-3p | ZEB1   | TP53  |
| CTCF | hsa-miR-622      | TP53  | hsa-miR-200a-3p | ZEB1   | SMAD3 |
| CTCF | hsa-miR-6722-3p  | TP53  | hsa-miR-203a-3p | CLOCK  | IL6   |
| CTCF | hsa-miR-5681a    | STAT3 | hsa-miR-203a-3p | JUN    | IL6   |
| CTCF | hsa-miR-4282     | HIF1A | hsa-miR-203a-3p | MAFK   | IL6   |
| CTCF | hsa-miR-484      | IL2   | hsa-miR-203a-3p | SMAD2  | TNF   |
| CTCF | hsa-miR-4748     | HIF1A | hsa-miR-203a-3p | HOXA1  | IL6   |
| CTCF | hsa-miR-548g-3p  | TLR4  | hsa-miR-203a-3p | ZEB1   | TNF   |
| CTCF | hsa-miR-608      | TP53  | hsa-miR-20a-5p  | CLOCK  | TP53  |
| CTCF | hsa-miR-6845-3p  | STAT3 | hsa-miR-20a-5p  | EGR2   | TP53  |
| CTCF | hsa-miR-30b-5p   | TP53  | hsa-miR-20a-5p  | EGR2   | HIF1A |
| CTCF | hsa-miR-4768-5p  | STAT3 | hsa-miR-20a-5p  | BACH1  | TP53  |
| CTCF | hsa-miR-146b-5p  | NFKB1 | hsa-miR-20a-5p  | BACH1  | HIF1A |
| CTCF | hsa-miR-146b-5p  | TLR4  | hsa-miR-20a-5p  | AFF1   | HIF1A |
| CTCF | hsa-miR-92a-3p   | NFKB1 | hsa-miR-20a-5p  | KLF3   | HIF1A |
| CTCF | hsa-miR-26a-5p   | IL6   | hsa-miR-20a-5p  | TCF4   | TP53  |
| CTCF | hsa-miR-5681b    | HIF1A | hsa-miR-20a-5p  | TCF4   | HIF1A |
| CTCF | hsa-miR-6807-3p  | HIF1A | hsa-miR-20a-5p  | ZBTB7A | HIF1A |
| CTCF | hsa-miR-199a-3p  | PTGS2 | hsa-miR-20a-5p  | NFAT5  | TP53  |
| CTCF | hsa-miR-874-3p   | STAT3 | hsa-miR-20a-5p  | NFAT5  | HIF1A |
| CTCF | hsa-miR-3160-3p  | HIF1A | hsa-miR-20a-5p  | SP4    | TP53  |
| CTCF | hsa-miR-4271     | TP53  | hsa-miR-20a-5p  | SP4    | HIF1A |
| CTCF | hsa-miR-1972     | TP53  | hsa-miR-20a-5p  | REST   | TP53  |
| CTCF | hsa-miR-548ah-5p | HIF1A | hsa-miR-20a-5p  | REST   | HIF1A |
| CTCF | hsa-miR-4270     | STAT3 | hsa-miR-20a-5p  | NR2C2  | TP53  |
| CTCF | hsa-miR-8055     | HIF1A | hsa-miR-20a-5p  | PPARG  | HIF1A |
| CTCF | hsa-miR-30d-5p   | TP53  | hsa-miR-20a-5p  | CREB1  | TP53  |
| CTCF | hsa-miR-144-3p   | TGFB1 | hsa-miR-20a-5p  | CREB1  | HIF1A |
| CTCF | hsa-miR-98-5p    | IL6   | hsa-miR-20a-5p  | GATA6  | TP53  |
| CTCF | hsa-miR-7113-5p  | STAT3 | hsa-miR-20a-5p  | GATA6  | HIF1A |
| CTCF | hsa-let-7i-5p    | TLR4  | hsa-miR-20a-5p  | ETV1   | TP53  |
| CTCF | hsa-miR-4487     | HIF1A | hsa-miR-20a-5p  | ETV1   | HIF1A |
| CTCF | hsa-miR-6755-5p  | HIF1A | hsa-miR-20a-5p  | IRF2   | TP53  |
| CTCF | hsa-miR-92b-3p   | SMAD3 | hsa-miR-20a-5p  | IRF2   | HIF1A |
| CTCF | hsa-miR-4659b-3p | TLR4  | hsa-miR-20a-5p  | E2F3   | TP53  |

|      |                  |       |                |        |       |
|------|------------------|-------|----------------|--------|-------|
| CTCF | hsa-miR-1234-3p  | STAT3 | hsa-miR-20a-5p | E2F3   | HIF1A |
| CTCF | hsa-miR-106b-5p  | STAT3 | hsa-miR-20a-5p | E2F2   | TP53  |
| CTCF | hsa-miR-106b-5p  | HIF1A | hsa-miR-20a-5p | E2F2   | HIF1A |
| CTCF | hsa-miR-203a-3p  | IL6   | hsa-miR-20a-5p | E2F1   | TP53  |
| CTCF | hsa-miR-203a-3p  | TNF   | hsa-miR-20a-5p | E2F1   | HIF1A |
| CTCF | hsa-miR-124-3p   | IL6   | hsa-miR-20a-5p | WHSC1  | TP53  |
| CTCF | hsa-miR-124-3p   | PTGS2 | hsa-miR-20a-5p | WHSC1  | HIF1A |
| CTCF | hsa-miR-124-3p   | STAT3 | hsa-miR-20a-5p | TCF7L2 | TP53  |
| CTCF | hsa-miR-181c-5p  | IL2   | hsa-miR-20a-5p | TCF7L2 | HIF1A |
| CTCF | hsa-miR-15a-5p   | NFKB1 | hsa-miR-20a-5p | HBP1   | HIF1A |
| CTCF | hsa-miR-15a-5p   | TP53  | hsa-miR-20a-5p | SPIB   | TP53  |
| CTCF | hsa-miR-15a-5p   | SMAD3 | hsa-miR-20a-5p | RUNX3  | TP53  |
| CTCF | hsa-miR-199b-5p  | HIF1A | hsa-miR-20a-5p | RUNX3  | HIF1A |
| CTCF | hsa-miR-744-5p   | PTGS2 | hsa-miR-20a-5p | RUNX1  | TP53  |
| CTCF | hsa-miR-744-5p   | TGFB1 | hsa-miR-20a-5p | RUNX1  | HIF1A |
| CTCF | hsa-miR-101-3p   | PTGS2 | hsa-miR-20a-5p | ELK4   | TP53  |
| CTCF | hsa-miR-365b-5p  | STAT3 | hsa-miR-20b-5p | SMAD4  | HIF1A |
| CTCF | hsa-miR-92a-1-5p | TP53  | hsa-miR-20b-5p | ZBTB7A | HIF1A |
| CTCF | hsa-miR-18a-3p   | SMAD3 | hsa-miR-20b-5p | AFF1   | HIF1A |
| CTCF | hsa-miR-4279     | TLR4  | hsa-miR-20b-5p | KLF3   | HIF1A |
| CTCF | hsa-miR-5003-5p  | TP53  | hsa-miR-20b-5p | TCF4   | HIF1A |
| CTCF | hsa-miR-139-5p   | NFKB1 | hsa-miR-20b-5p | SP4    | HIF1A |
| CTCF | hsa-miR-889-3p   | HIF1A | hsa-miR-20b-5p | CREB1  | HIF1A |
| CTCF | hsa-miR-491-5p   | TP53  | hsa-miR-20b-5p | PPARG  | HIF1A |
| CTCF | hsa-miR-491-5p   | SMAD3 | hsa-miR-20b-5p | REST   | HIF1A |
| CTCF | hsa-miR-4799-5p  | HIF1A | hsa-miR-20b-5p | GATA6  | HIF1A |
| CTCF | hsa-miR-4685-5p  | STAT3 | hsa-miR-20b-5p | NFAT5  | HIF1A |
| CTCF | hsa-miR-365a-5p  | STAT3 | hsa-miR-20b-5p | E2F3   | HIF1A |
| CTCF | hsa-miR-6754-5p  | STAT3 | hsa-miR-20b-5p | E2F2   | HIF1A |
| CTCF | hsa-miR-4286     | TP53  | hsa-miR-20b-5p | E2F1   | HIF1A |
| CTCF | hsa-miR-4778-3p  | STAT3 | hsa-miR-20b-5p | ESR1   | HIF1A |
| CTCF | hsa-miR-6133     | TP53  | hsa-miR-20b-5p | WHSC1  | HIF1A |
| CTCF | hsa-miR-6130     | TP53  | hsa-miR-20b-5p | TCF7L2 | HIF1A |
| CTCF | hsa-miR-199a-5p  | PTGS2 | hsa-miR-20b-5p | HBP1   | HIF1A |
| CTCF | hsa-miR-199a-5p  | HIF1A | hsa-miR-20b-5p | RUNX3  | HIF1A |
| CTCF | hsa-miR-199a-5p  | NFKB1 | hsa-miR-20b-5p | MXI1   | HIF1A |

|      |                  |       |                |        |       |
|------|------------------|-------|----------------|--------|-------|
| CTCF | hsa-miR-15b-5p   | SMAD3 | hsa-miR-210-3p | E2F3   | HIF1A |
| CTCF | hsa-miR-99a-5p   | PTGS2 | hsa-miR-210-3p | MNT    | HIF1A |
| CTCF | hsa-miR-10b-5p   | TP53  | hsa-miR-210-3p | HIF1A  | NFKB1 |
| CTCF | hsa-miR-3658     | TLR4  | hsa-miR-210-3p | ELK3   | NFKB1 |
| CTCF | hsa-miR-5692a    | HIF1A | hsa-miR-210-3p | HOXA1  | NFKB1 |
| CTCF | hsa-miR-92a-2-5p | TP53  | hsa-miR-210-3p | HOXA1  | HIF1A |
| CTCF | hsa-miR-4662a-5p | HIF1A | hsa-miR-210-3p | MITF   | NFKB1 |
| CTCF | hsa-miR-4499     | HIF1A | hsa-miR-210-3p | MITF   | HIF1A |
| CTCF | hsa-miR-6511a-5p | HIF1A | hsa-miR-211-5p | NFAT5  | TGFB1 |
| CTCF | hsa-miR-3128     | HIF1A | hsa-miR-211-5p | NFATC1 | TGFB1 |
| CTCF | hsa-miR-4738-3p  | TLR4  | hsa-miR-211-5p | SP1    | TGFB1 |
| CTCF | hsa-miR-4418     | HIF1A | hsa-miR-211-5p | TCF12  | TGFB1 |
| CTCF | hsa-miR-6871-3p  | STAT3 | hsa-miR-211-5p | SNAI2  | TGFB1 |
| CTCF | hsa-miR-93-5p    | TGFB1 | hsa-miR-211-5p | POU2F2 | TGFB1 |
| CTCF | hsa-miR-93-5p    | STAT3 | hsa-miR-214-3p | TFAP2A | TP53  |
| CTCF | hsa-miR-93-5p    | HIF1A | hsa-miR-214-3p | NFIC   | TP53  |
| CTCF | hsa-miR-187-3p   | TNF   | hsa-miR-214-3p | XBP1   | TP53  |
| CTCF | hsa-miR-329-5p   | HIF1A | hsa-miR-21-5p  | HIF1A  | TGFB1 |
| CTCF | hsa-miR-5702     | TP53  | hsa-miR-21-5p  | HIF1A  | NFKB1 |
| CTCF | hsa-miR-4419a    | TP53  | hsa-miR-21-5p  | TP63   | NFKB1 |
| CTCF | hsa-miR-137      | PTGS2 | hsa-miR-21-5p  | TP63   | HIF1A |
| CTCF | hsa-miR-652-3p   | PTGS2 | hsa-miR-21-5p  | TCF21  | NFKB1 |
| CTCF | hsa-miR-8071     | TP53  | hsa-miR-21-5p  | TCF21  | HIF1A |
| CTCF | hsa-miR-1-3p     | IL6   | hsa-miR-21-5p  | KLF9   | TGFB1 |
| CTCF | hsa-miR-1-3p     | TLR4  | hsa-miR-21-5p  | KLF9   | HIF1A |
| CTCF | hsa-miR-4290     | SMAD3 | hsa-miR-21-5p  | KLF9   | NFKB1 |
| CTCF | hsa-miR-6893-5p  | HIF1A | hsa-miR-21-5p  | NFAT5  | TGFB1 |
| CTCF | hsa-miR-337-3p   | STAT3 | hsa-miR-21-5p  | NFAT5  | HIF1A |
| CTCF | hsa-miR-663a     | TGFB1 | hsa-miR-21-5p  | NFAT5  | NFKB1 |
| CTCF | hsa-miR-365a-3p  | IL6   | hsa-miR-21-5p  | E2F3   | HIF1A |
| CTCF | hsa-miR-149-3p   | TP53  | hsa-miR-21-5p  | E2F2   | HIF1A |
| CTCF | hsa-miR-589-5p   | PTGS2 | hsa-miR-21-5p  | E2F1   | NFKB1 |
| CTCF | hsa-miR-605-5p   | TP53  | hsa-miR-21-5p  | E2F1   | HIF1A |
| CTCF | hsa-miR-940      | HIF1A | hsa-miR-21-5p  | WHSC1  | NFKB1 |
| CTCF | hsa-miR-4306     | TP53  | hsa-miR-21-5p  | WHSC1  | HIF1A |
| CTCF | hsa-miR-1910-3p  | HIF1A | hsa-miR-21-5p  | MEF2C  | NFKB1 |

|      |                 |       |                 |         |       |
|------|-----------------|-------|-----------------|---------|-------|
| CTCF | hsa-miR-6875-3p | STAT3 | hsa-miR-21-5p   | BCL6    | TGFB1 |
| CTCF | hsa-miR-200a-3p | TP53  | hsa-miR-21-5p   | BCL6    | TLR4  |
| CTCF | hsa-miR-200a-3p | SMAD3 | hsa-miR-21-5p   | BCL6    | HIF1A |
| CTCF | hsa-miR-138-5p  | HIF1A | hsa-miR-21-5p   | BCL6    | NFKB1 |
| CTCF | hsa-miR-19a-3p  | TNF   | hsa-miR-21-5p   | ATF2    | TGFB1 |
| CTCF | hsa-miR-19a-3p  | TP53  | hsa-miR-21-5p   | ATF2    | HIF1A |
| CTCF | hsa-miR-19b-3p  | TGFB1 | hsa-miR-21-5p   | ATF2    | NFKB1 |
| CTCF | hsa-miR-19b-3p  | TP53  | hsa-miR-217     | E2F3    | HIF1A |
| CTCF | hsa-miR-125a-5p | TP53  | hsa-miR-217     | HINFP   | HIF1A |
| CTCF | hsa-miR-34b-5p  | HIF1A | hsa-miR-217     | TCF7L2  | HIF1A |
| CTCF | hsa-miR-630     | TLR4  | hsa-miR-223-3p  | E2F1    | TP53  |
| CTCF | hsa-miR-335-5p  | IL6   | hsa-miR-223-3p  | SP1     | TP53  |
| CTCF | hsa-miR-335-5p  | PTGS2 | hsa-miR-223-3p  | MEF2C   | IL6   |
| CTCF | hsa-miR-335-5p  | IL17A | hsa-miR-223-3p  | PRDM1   | IL6   |
| CTCF | hsa-miR-335-5p  | TLR4  | hsa-miR-223-3p  | TP53    | IL6   |
| CTCF | hsa-miR-335-5p  | SMAD3 | hsa-miR-22-3p   | FOXP1   | HIF1A |
| CTCF | hsa-miR-320a    | PTGS2 | hsa-miR-22-3p   | IRF5    | HIF1A |
| CTCF | hsa-miR-31-5p   | FOXP3 | hsa-miR-24-3p   | NFAT5   | TGFB1 |
| CTCF | hsa-miR-4694-3p | TLR4  | hsa-miR-24-3p   | HSF2    | TGFB1 |
| CTCF | hsa-miR-26b-5p  | NFKB1 | hsa-miR-24-3p   | MXI1    | TGFB1 |
| CTCF | hsa-miR-26b-5p  | PTGS2 | hsa-miR-24-3p   | HNF4A   | TGFB1 |
| CTCF | hsa-miR-1296-3p | TP53  | hsa-miR-24-3p   | ATF3    | TGFB1 |
| CTCF | hsa-miR-18a-5p  | TP53  | hsa-miR-24-3p   | GATA6   | TGFB1 |
| CTCF | hsa-miR-18a-5p  | HIF1A | hsa-miR-2682-5p | MYC     | HIF1A |
| CTCF | hsa-miR-18a-5p  | SMAD3 | hsa-miR-26a-5p  | E2F7    | IL6   |
| CTCF | hsa-miR-1264    | TP53  | hsa-miR-26a-5p  | UBTF    | IL6   |
| CTCF | hsa-miR-9-5p    | NFKB1 | hsa-miR-26a-5p  | AHR     | IL6   |
| CTCF | hsa-miR-625-3p  | HIF1A | hsa-miR-26b-5p  | BATF    | NFKB1 |
| CTCF | hsa-miR-371b-3p | STAT3 | hsa-miR-26b-5p  | FOXM1   | NFKB1 |
| CTCF | hsa-miR-1908-5p | PTGS2 | hsa-miR-26b-5p  | FOXM1   | PTGS2 |
| CTCF | hsa-miR-5193    | TP53  | hsa-miR-26b-5p  | NKX2-2  | PTGS2 |
| CTCF | hsa-miR-151a-3p | HIF1A | hsa-miR-26b-5p  | IKZF1   | NFKB1 |
| CTCF | hsa-miR-7110-3p | STAT3 | hsa-miR-26b-5p  | ZKSCAN1 | PTGS2 |
| CTCF | hsa-miR-146a-5p | PTGS2 | hsa-miR-26b-5p  | NFE2L2  | PTGS2 |
| CTCF | hsa-miR-146a-5p | TLR4  | hsa-miR-26b-5p  | JUN     | NFKB1 |
| CTCF | hsa-miR-146a-5p | NFKB1 | hsa-miR-26b-5p  | JUN     | PTGS2 |



|      |                  |       |                 |        |       |
|------|------------------|-------|-----------------|--------|-------|
| CTCF | hsa-miR-6809-3p  | STAT3 | hsa-miR-26b-5p  | BCLAF1 | NFKB1 |
| CTCF | hsa-miR-6808-5p  | HIF1A | hsa-miR-26b-5p  | MTA3   | NFKB1 |
| CTCF | hsa-miR-16-5p    | PTGS2 | hsa-miR-26b-5p  | SRF    | NFKB1 |
| CTCF | hsa-miR-16-5p    | TP53  | hsa-miR-26b-5p  | SRF    | PTGS2 |
| CTCF | hsa-miR-16-5p    | NFKB1 | hsa-miR-26b-5p  | FOXD2  | NFKB1 |
| CTCF | hsa-miR-16-5p    | SMAD3 | hsa-miR-26b-5p  | TCF12  | NFKB1 |
| CTCF | hsa-miR-6806-5p  | HIF1A | hsa-miR-26b-5p  | TCF12  | PTGS2 |
| CTCF | hsa-miR-33a-5p   | HIF1A | hsa-miR-26b-5p  | GATA4  | NFKB1 |
| CTCF | hsa-miR-5197-5p  | TP53  | hsa-miR-26b-5p  | GATA4  | PTGS2 |
| CTCF | hsa-miR-122-5p   | TGFB1 | hsa-miR-26b-5p  | GATA2  | NFKB1 |
| CTCF | hsa-miR-935      | HIF1A | hsa-miR-26b-5p  | GATA2  | PTGS2 |
| CTCF | hsa-miR-454-3p   | TP53  | hsa-miR-26b-5p  | E2F7   | PTGS2 |
| CTCF | hsa-miR-4742-3p  | TLR4  | hsa-miR-26b-5p  | ETV4   | NFKB1 |
| CTCF | hsa-miR-2682-5p  | HIF1A | hsa-miR-26b-5p  | IRF4   | NFKB1 |
| CTCF | hsa-miR-142-3p   | IL6   | hsa-miR-26b-5p  | MXI1   | NFKB1 |
| CTCF | hsa-miR-6789-3p  | STAT3 | hsa-miR-26b-5p  | MXI1   | PTGS2 |
| CTCF | hsa-miR-4650-5p  | TP53  | hsa-miR-26b-5p  | MEF2C  | NFKB1 |
| CTCF | hsa-miR-4531     | TP53  | hsa-miR-26b-5p  | ATF3   | PTGS2 |
| CTCF | hsa-miR-132-3p   | PTGS2 | hsa-miR-296-3p  | SPI1   | PTGS2 |
| CTCF | hsa-miR-6815-3p  | HIF1A | hsa-miR-296-3p  | TFAP2A | PTGS2 |
| CTCF | hsa-miR-153-5p   | HIF1A | hsa-miR-296-3p  | MAZ    | PTGS2 |
| CTCF | hsa-miR-3074-3p  | HIF1A | hsa-miR-296-3p  | SETDB1 | PTGS2 |
| CTCF | hsa-miR-1468-3p  | TLR4  | hsa-miR-296-3p  | KDM5B  | PTGS2 |
| CTCF | hsa-miR-324-3p   | TGFB1 | hsa-miR-299-5p  | KLF3   | HIF1A |
| CTCF | hsa-miR-3529-3p  | TP53  | hsa-miR-29b-3p  | FOS    | TGFB1 |
| CTCF | hsa-miR-3529-3p  | SMAD3 | hsa-miR-29b-3p  | SP1    | TGFB1 |
| CTCF | hsa-miR-4682     | TP53  | hsa-miR-29b-3p  | MAZ    | TGFB1 |
| CTCF | hsa-miR-509-3-5p | HIF1A | hsa-miR-29b-3p  | REST   | TGFB1 |
| CTCF | hsa-miR-30e-5p   | TP53  | hsa-miR-29b-3p  | GATA3  | TGFB1 |
| CTCF | hsa-miR-17-5p    | TGFB1 | hsa-miR-29b-3p  | ESR1   | TGFB1 |
| CTCF | hsa-miR-17-5p    | PTGS2 | hsa-miR-3074-3p | MAFK   | HIF1A |
| CTCF | hsa-miR-17-5p    | HIF1A | hsa-miR-3074-3p | AFF1   | HIF1A |
| CTCF | hsa-miR-17-5p    | SMAD3 | hsa-miR-30b-5p  | NFAT5  | TP53  |
| CTCF | hsa-miR-17-5p    | TP53  | hsa-miR-30b-5p  | SP4    | TP53  |
| CTCF | hsa-let-7a-5p    | IL6   | hsa-miR-30b-5p  | FOXG1  | TP53  |
| CTCF | hsa-let-7a-5p    | PTGS2 | hsa-miR-30b-5p  | ERG    | TP53  |

|      |                  |       |                 |         |       |
|------|------------------|-------|-----------------|---------|-------|
| CTCF | hsa-let-7a-5p    | NFKB1 | hsa-miR-30b-5p  | SMAD1   | TP53  |
| CTCF | hsa-miR-6872-3p  | STAT3 | hsa-miR-30b-5p  | KLF4    | TP53  |
| CTCF | hsa-miR-4735-3p  | HIF1A | hsa-miR-30b-5p  | TFDP1   | TP53  |
| CTCF | hsa-miR-138-2-3p | STAT3 | hsa-miR-30b-5p  | MYBL2   | TP53  |
| CTCF | hsa-miR-6878-5p  | STAT3 | hsa-miR-30b-5p  | HEY1    | TP53  |
| CTCF | hsa-miR-618      | STAT3 | hsa-miR-30d-5p  | ARID3A  | TP53  |
| CTCF | hsa-miR-3609     | HIF1A | hsa-miR-30d-5p  | IRF2    | TP53  |
| CTCF | hsa-miR-7151-3p  | STAT3 | hsa-miR-30d-5p  | FOXG1   | TP53  |
| CTCF | hsa-miR-922      | STAT3 | hsa-miR-30d-5p  | MAZ     | TP53  |
| CTCF | hsa-miR-3668     | HIF1A | hsa-miR-30d-5p  | SP4     | TP53  |
| CTCF | hsa-miR-1181     | STAT3 | hsa-miR-30d-5p  | SMAD1   | TP53  |
| CTCF | hsa-miR-155-5p   | IL6   | hsa-miR-30d-5p  | NFAT5   | TP53  |
| CTCF | hsa-miR-155-5p   | NFKB1 | hsa-miR-30d-5p  | MYC     | TP53  |
| CTCF | hsa-miR-155-5p   | IL2   | hsa-miR-30d-5p  | MYBL2   | TP53  |
| CTCF | hsa-miR-155-5p   | SMAD3 | hsa-miR-30d-5p  | TFDP1   | TP53  |
| CTCF | hsa-miR-424-5p   | HIF1A | hsa-miR-30e-5p  | ARID3A  | TP53  |
| CTCF | hsa-miR-3121-3p  | HIF1A | hsa-miR-30e-5p  | NFAT5   | TP53  |
| CTCF | hsa-miR-4720-3p  | STAT3 | hsa-miR-30e-5p  | FOXG1   | TP53  |
| CTCF | hsa-miR-211-5p   | TGFB1 | hsa-miR-30e-5p  | SP4     | TP53  |
| CTCF | hsa-miR-500b-3p  | STAT3 | hsa-miR-30e-5p  | TFDP1   | TP53  |
| CTCF | hsa-miR-149-5p   | IL6   | hsa-miR-30e-5p  | RELA    | TP53  |
| CTCF | hsa-miR-6842-5p  | TP53  | hsa-miR-30e-5p  | MYBL2   | TP53  |
| CTCF | hsa-miR-20a-5p   | TP53  | hsa-miR-3121-3p | TAL1    | HIF1A |
| CTCF | hsa-miR-20a-5p   | HIF1A | hsa-miR-3128    | E2F3    | HIF1A |
| CTCF | hsa-miR-6837-5p  | STAT3 | hsa-miR-3160-3p | ZNF250  | HIF1A |
| CTCF | hsa-miR-100-5p   | PTGS2 | hsa-miR-3160-3p | ZFX     | HIF1A |
| CTCF | hsa-miR-106b-3p  | HIF1A | hsa-miR-3160-3p | RUNX3   | HIF1A |
| CTCF | hsa-miR-4698     | TLR4  | hsa-miR-3165    | MNT     | TP53  |
| CTCF | hsa-miR-130a-3p  | TGFB1 | hsa-miR-320a    | SMARCC2 | PTGS2 |
| CTCF | hsa-miR-130a-3p  | TNF   | hsa-miR-320a    | NANOG   | PTGS2 |
| CTCF | hsa-miR-195-5p   | SMAD3 | hsa-miR-320a    | TFAP2A  | PTGS2 |
| CTCF | hsa-miR-6760-5p  | TP53  | hsa-miR-320a    | TP73    | PTGS2 |
| CTCF | hsa-miR-193b-3p  | SMAD3 | hsa-miR-320a    | HOXA10  | PTGS2 |
| CTCF | hsa-let-7e-5p    | STAT3 | hsa-miR-320a    | NCOR1   | PTGS2 |
| CTCF | hsa-miR-5581-3p  | STAT3 | hsa-miR-324-3p  | MYC     | TGFB1 |
| CTCF | hsa-miR-519d-3p  | STAT3 | hsa-miR-324-3p  | SRF     | TGFB1 |

|      |                  |       |                |        |       |
|------|------------------|-------|----------------|--------|-------|
| CTCF | hsa-miR-519d-3p  | HIF1A | hsa-miR-329-5p | ZNF83  | HIF1A |
| CTCF | hsa-miR-217      | HIF1A | hsa-miR-329-5p | ZFX    | HIF1A |
| CTCF | hsa-miR-633      | TGFB1 | hsa-miR-335-5p | FOXP1  | SMAD3 |
| CTCF | hsa-miR-4470     | HIF1A | hsa-miR-335-5p | CDX2   | PTGS2 |
| CTCF | hsa-miR-106a-3p  | HIF1A | hsa-miR-335-5p | CDX2   | TLR4  |
| CTCF | hsa-miR-494-3p   | HIF1A | hsa-miR-335-5p | CDX2   | SMAD3 |
| CTCF | hsa-miR-4659a-3p | TLR4  | hsa-miR-335-5p | JUND   | IL6   |
| CTCF | hsa-miR-29b-3p   | TGFB1 | hsa-miR-335-5p | JUND   | PTGS2 |
| CTCF | hsa-miR-223-3p   | IL6   | hsa-miR-335-5p | JUND   | TLR4  |
| CTCF | hsa-miR-223-3p   | TP53  | hsa-miR-335-5p | JUND   | SMAD3 |
| CTCF | hsa-miR-21-5p    | TGFB1 | hsa-miR-335-5p | HOXC6  | PTGS2 |
| CTCF | hsa-miR-21-5p    | TLR4  | hsa-miR-335-5p | FOXO3  | PTGS2 |
| CTCF | hsa-miR-21-5p    | HIF1A | hsa-miR-335-5p | TEAD2  | PTGS2 |
| CTCF | hsa-miR-21-5p    | NFKB1 | hsa-miR-335-5p | TEAD2  | SMAD3 |
| CTCF | hsa-miR-452-5p   | TNF   | hsa-miR-335-5p | FOXD2  | SMAD3 |
| CTCF | hsa-miR-509-5p   | HIF1A | hsa-miR-335-5p | MAFB   | PTGS2 |
| CTCF | hsa-miR-4438     | STAT3 | hsa-miR-335-5p | SOX17  | SMAD3 |
| CTCF | hsa-miR-526b-5p  | TLR4  | hsa-miR-335-5p | SOX4   | IL6   |
| CTCF | hsa-miR-145-5p   | SMAD3 | hsa-miR-335-5p | SOX4   | PTGS2 |
| CTCF | hsa-miR-449c-5p  | HIF1A | hsa-miR-335-5p | NANOG  | IL6   |
| CTCF | hsa-miR-7-5p     | TLR4  | hsa-miR-335-5p | NANOG  | PTGS2 |
| CTCF | hsa-miR-519c-3p  | HIF1A | hsa-miR-335-5p | NANOG  | SMAD3 |
| CTCF | hsa-miR-181a-5p  | PTGS2 | hsa-miR-335-5p | RARG   | PTGS2 |
| CTCF | hsa-miR-181a-5p  | STAT3 | hsa-miR-335-5p | EHF    | PTGS2 |
| CTCF | hsa-miR-20b-5p   | HIF1A | hsa-miR-335-5p | EHF    | SMAD3 |
| CTCF | hsa-miR-128-3p   | PTGS2 | hsa-miR-335-5p | BACH2  | TLR4  |
| CTCF | hsa-miR-6807-5p  | STAT3 | hsa-miR-335-5p | FOS    | IL6   |
| CTCF | hsa-miR-7158-5p  | STAT3 | hsa-miR-335-5p | FOS    | PTGS2 |
| CTCF | hsa-miR-4464     | HIF1A | hsa-miR-335-5p | FOS    | TLR4  |
| CTCF | hsa-miR-106a-5p  | IL10  | hsa-miR-335-5p | MAFF   | IL6   |
| CTCF | hsa-miR-106a-5p  | TP53  | hsa-miR-335-5p | MAFF   | SMAD3 |
| CTCF | hsa-miR-1233-5p  | TP53  | hsa-miR-335-5p | SREBF1 | PTGS2 |
| CTCF | hsa-miR-4463     | HIF1A | hsa-miR-335-5p | USF2   | PTGS2 |
| CTCF | hsa-let-7c-5p    | IL6   | hsa-miR-335-5p | USF2   | IL17A |
| CTCF | hsa-let-7c-5p    | PTGS2 | hsa-miR-335-5p | USF2   | TLR4  |
| CTCF | hsa-let-7c-5p    | IL10  | hsa-miR-335-5p | USF2   | SMAD3 |

|       |                 |       |                |        |       |
|-------|-----------------|-------|----------------|--------|-------|
| CTCF  | hsa-miR-4441    | STAT3 | hsa-miR-335-5p | MXD1   | SMAD3 |
| CTCF  | hsa-miR-299-5p  | HIF1A | hsa-miR-335-5p | TFE3   | SMAD3 |
| CTCF  | hsa-miR-107     | IL6   | hsa-miR-335-5p | MYC    | IL6   |
| CTCF  | hsa-miR-107     | HIF1A | hsa-miR-335-5p | MYC    | PTGS2 |
| CTCF  | hsa-miR-4725-3p | TP53  | hsa-miR-335-5p | MYC    | TLR4  |
| CTCFL | hsa-miR-663a    | TGFB1 | hsa-miR-335-5p | MYC    | SMAD3 |
| CTCFL | hsa-miR-6760-5p | TP53  | hsa-miR-335-5p | KLF9   | SMAD3 |
| CUX1  | hsa-miR-210-3p  | NFKB1 | hsa-miR-335-5p | LYL1   | PTGS2 |
| CUX1  | hsa-miR-210-3p  | HIF1A | hsa-miR-335-5p | LYL1   | SMAD3 |
| CUX1  | hsa-miR-4799-5p | HIF1A | hsa-miR-335-5p | ATOH1  | IL6   |
| CUX1  | hsa-miR-1972    | TP53  | hsa-miR-335-5p | ATOH1  | PTGS2 |
| CUX1  | hsa-miR-942-5p  | TLR4  | hsa-miR-335-5p | NFAT5  | PTGS2 |
| CUX1  | hsa-miR-199b-5p | HIF1A | hsa-miR-335-5p | NFAT5  | SMAD3 |
| CUX1  | hsa-miR-22-3p   | HIF1A | hsa-miR-335-5p | ASCL2  | PTGS2 |
| CUX1  | hsa-miR-365a-3p | IL6   | hsa-miR-335-5p | ASCL2  | SMAD3 |
| CUX1  | hsa-miR-3128    | HIF1A | hsa-miR-335-5p | SP1    | PTGS2 |
| CUX1  | hsa-miR-142-3p  | IL6   | hsa-miR-335-5p | SP1    | SMAD3 |
| CUX1  | hsa-miR-4650-5p | TP53  | hsa-miR-335-5p | REST   | IL6   |
| CUX1  | hsa-miR-5702    | TP53  | hsa-miR-335-5p | REST   | PTGS2 |
| CUX1  | hsa-miR-3160-3p | HIF1A | hsa-miR-335-5p | REST   | TLR4  |
| CUX1  | hsa-miR-5193    | TP53  | hsa-miR-335-5p | REST   | SMAD3 |
| CUX1  | hsa-miR-17-5p   | TGFB1 | hsa-miR-335-5p | SALL4  | SMAD3 |
| CUX1  | hsa-miR-17-5p   | TP53  | hsa-miR-335-5p | POU5F1 | IL6   |
| CUX1  | hsa-miR-17-5p   | HIF1A | hsa-miR-335-5p | POU5F1 | PTGS2 |
| CUX1  | hsa-miR-17-5p   | SMAD3 | hsa-miR-335-5p | POU5F1 | SMAD3 |
| CUX1  | hsa-miR-6872-3p | STAT3 | hsa-miR-335-5p | EBF1   | IL6   |
| CUX1  | hsa-miR-1322    | HIF1A | hsa-miR-335-5p | EBF1   | IL17A |
| CUX1  | hsa-miR-4487    | HIF1A | hsa-miR-335-5p | ZEB1   | PTGS2 |
| CUX1  | hsa-miR-3662    | HIF1A | hsa-miR-335-5p | ZEB1   | SMAD3 |
| CUX1  | hsa-miR-365a-5p | STAT3 | hsa-miR-335-5p | HEY1   | SMAD3 |
| CUX1  | hsa-miR-1181    | STAT3 | hsa-miR-335-5p | ETV1   | PTGS2 |
| DLX1  | hsa-miR-132-3p  | PTGS2 | hsa-miR-335-5p | ETV5   | PTGS2 |
| DLX1  | hsa-miR-3934-5p | PTGS2 | hsa-miR-335-5p | ETV5   | SMAD3 |
| DLX1  | hsa-miR-130b-3p | STAT3 | hsa-miR-335-5p | MXI1   | IL6   |
| DLX1  | hsa-miR-5692a   | HIF1A | hsa-miR-335-5p | MXI1   | PTGS2 |
| DLX1  | hsa-miR-93-5p   | STAT3 | hsa-miR-335-5p | MXI1   | IL17A |

|      |                 |       |                |         |       |
|------|-----------------|-------|----------------|---------|-------|
| DLX1 | hsa-miR-93-5p   | HIF1A | hsa-miR-335-5p | MXI1    | TLR4  |
| DLX1 | hsa-let-7a-5p   | PTGS2 | hsa-miR-335-5p | MXI1    | SMAD3 |
| DLX1 | hsa-miR-6807-3p | HIF1A | hsa-miR-335-5p | SPDEF   | PTGS2 |
| DLX1 | hsa-miR-6807-5p | STAT3 | hsa-miR-335-5p | SPDEF   | SMAD3 |
| DLX1 | hsa-miR-106b-5p | STAT3 | hsa-miR-335-5p | RFX2    | SMAD3 |
| DLX1 | hsa-miR-106b-5p | HIF1A | hsa-miR-335-5p | HBP1    | IL6   |
| DLX1 | hsa-miR-106b-3p | HIF1A | hsa-miR-335-5p | HBP1    | PTGS2 |
| DLX1 | hsa-miR-335-5p  | PTGS2 | hsa-miR-335-5p | HBP1    | SMAD3 |
| DLX1 | hsa-miR-335-5p  | SMAD3 | hsa-miR-335-5p | MYOD1   | IL6   |
| E2F1 | hsa-miR-6872-3p | STAT3 | hsa-miR-335-5p | MYOD1   | SMAD3 |
| E2F1 | hsa-miR-365a-5p | STAT3 | hsa-miR-335-5p | BHLHE40 | IL6   |
| E2F1 | hsa-miR-935     | HIF1A | hsa-miR-335-5p | BHLHE40 | IL17A |
| E2F2 | hsa-miR-5702    | TP53  | hsa-miR-335-5p | BHLHE40 | TLR4  |
| E2F3 | hsa-miR-6807-3p | HIF1A | hsa-miR-335-5p | BHLHE40 | SMAD3 |
| E2F3 | hsa-miR-5692a   | HIF1A | hsa-miR-335-5p | MEF2A   | IL17A |
| E2F3 | hsa-miR-106b-3p | HIF1A | hsa-miR-335-5p | FOXA2   | IL6   |
| E2F4 | hsa-miR-132-3p  | PTGS2 | hsa-miR-335-5p | FOXA2   | PTGS2 |
| E2F4 | hsa-miR-30e-5p  | TP53  | hsa-miR-335-5p | FOXA2   | SMAD3 |
| E2F4 | hsa-miR-18a-5p  | TP53  | hsa-miR-335-5p | HOXA2   | PTGS2 |
| E2F4 | hsa-miR-18a-5p  | HIF1A | hsa-miR-335-5p | ZMIZ1   | IL6   |
| E2F4 | hsa-miR-500b-3p | STAT3 | hsa-miR-335-5p | ZMIZ1   | SMAD3 |
| E2F4 | hsa-miR-9-5p    | NFKB1 | hsa-miR-335-5p | BCL6    | IL6   |
| E2F4 | hsa-miR-1908-5p | PTGS2 | hsa-miR-335-5p | BCL6    | TLR4  |
| E2F4 | hsa-miR-106a-3p | HIF1A | hsa-miR-335-5p | BCL6    | SMAD3 |
| E2F4 | hsa-miR-130b-3p | STAT3 | hsa-miR-335-5p | KDM5A   | PTGS2 |
| E2F4 | hsa-miR-151a-3p | HIF1A | hsa-miR-335-5p | KDM5A   | SMAD3 |
| E2F4 | hsa-let-7b-5p   | PTGS2 | hsa-miR-335-5p | KDM5B   | IL6   |
| E2F4 | hsa-let-7b-5p   | TLR4  | hsa-miR-335-5p | KDM5B   | PTGS2 |
| E2F4 | hsa-let-7b-5p   | HIF1A | hsa-miR-335-5p | ATF2    | IL6   |
| E2F4 | hsa-miR-942-5p  | TLR4  | hsa-miR-335-5p | ATF2    | IL17A |
| E2F4 | hsa-miR-16-5p   | PTGS2 | hsa-miR-335-5p | ATF2    | SMAD3 |
| E2F4 | hsa-miR-16-5p   | TP53  | hsa-miR-337-3p | MTA3    | STAT3 |
| E2F4 | hsa-miR-16-5p   | NFKB1 | hsa-miR-33a-5p | FOXP1   | HIF1A |
| E2F4 | hsa-miR-203a-3p | IL6   | hsa-miR-33a-5p | SREBF1  | HIF1A |
| E2F4 | hsa-miR-203a-3p | TNF   | hsa-miR-33a-5p | MYC     | HIF1A |
| E2F4 | hsa-miR-99a-5p  | PTGS2 | hsa-miR-33a-5p | KLF9    | HIF1A |

|      |                 |       |                 |         |       |
|------|-----------------|-------|-----------------|---------|-------|
| E2F4 | hsa-miR-7-5p    | TLR4  | hsa-miR-34b-5p  | MYC     | HIF1A |
| E2F4 | hsa-miR-22-3p   | HIF1A | hsa-miR-34b-5p  | MYB     | HIF1A |
| E2F4 | hsa-miR-5197-5p | TP53  | hsa-miR-34b-5p  | HNF4A   | HIF1A |
| E2F4 | hsa-miR-6722-3p | TP53  | hsa-miR-34b-5p  | CREB1   | HIF1A |
| E2F4 | hsa-miR-4470    | HIF1A | hsa-miR-3529-3p | TFAP2A  | TP53  |
| E2F4 | hsa-miR-15a-5p  | NFKB1 | hsa-miR-3529-3p | TP53    | SMAD3 |
| E2F4 | hsa-miR-15a-5p  | TP53  | hsa-miR-3529-3p | HOXA13  | TP53  |
| E2F4 | hsa-miR-4499    | HIF1A | hsa-miR-3529-3p | HOXA13  | SMAD3 |
| E2F4 | hsa-miR-2682-5p | HIF1A | hsa-miR-3609    | NFAT5   | HIF1A |
| E2F4 | hsa-miR-155-5p  | IL6   | hsa-miR-3609    | SP4     | HIF1A |
| E2F4 | hsa-miR-155-5p  | NFKB1 | hsa-miR-3609    | REST    | HIF1A |
| E2F4 | hsa-miR-1264    | TP53  | hsa-miR-3609    | HBP1    | HIF1A |
| E2F4 | hsa-miR-296-3p  | PTGS2 | hsa-miR-3609    | RUNX3   | HIF1A |
| E2F4 | hsa-miR-4419a   | TP53  | hsa-miR-365a-5p | ZKSCAN1 | STAT3 |
| E2F4 | hsa-miR-6815-3p | HIF1A | hsa-miR-365b-5p | ZKSCAN1 | STAT3 |
| E2F4 | hsa-miR-137     | PTGS2 | hsa-miR-3662    | ETS2    | HIF1A |
| E2F4 | hsa-miR-652-3p  | PTGS2 | hsa-miR-3668    | BACH1   | HIF1A |
| E2F4 | hsa-miR-3160-3p | HIF1A | hsa-miR-3668    | CEBPD   | HIF1A |
| E2F4 | hsa-miR-142-3p  | IL6   | hsa-miR-3668    | ESR1    | HIF1A |
| E2F4 | hsa-miR-1468-3p | TLR4  | hsa-miR-379-3p  | ELK4    | PTGS2 |
| E2F4 | hsa-let-7a-5p   | IL6   | hsa-miR-379-3p  | HOXA10  | PTGS2 |
| E2F4 | hsa-let-7a-5p   | PTGS2 | hsa-miR-3934-5p | PAX5    | PTGS2 |
| E2F4 | hsa-let-7a-5p   | NFKB1 | hsa-miR-3934-5p | ZKSCAN1 | PTGS2 |
| E2F4 | hsa-miR-8055    | HIF1A | hsa-miR-424-5p  | NFIC    | HIF1A |
| E2F4 | hsa-miR-17-5p   | PTGS2 | hsa-miR-424-5p  | E2F7    | HIF1A |
| E2F4 | hsa-miR-17-5p   | TP53  | hsa-miR-424-5p  | SPI1    | HIF1A |
| E2F4 | hsa-miR-17-5p   | HIF1A | hsa-miR-424-5p  | CDX2    | HIF1A |
| E2F4 | hsa-miR-17-5p   | TGFB1 | hsa-miR-424-5p  | HOXA10  | HIF1A |
| E2F4 | hsa-miR-663a    | TGFB1 | hsa-miR-424-5p  | MAFK    | HIF1A |
| E2F4 | hsa-miR-30d-5p  | TP53  | hsa-miR-424-5p  | GABPA   | HIF1A |
| E2F4 | hsa-miR-589-5p  | PTGS2 | hsa-miR-424-5p  | MYB     | HIF1A |
| E2F4 | hsa-miR-4279    | TLR4  | hsa-miR-4270    | ASCL2   | STAT3 |
| E2F4 | hsa-miR-146b-5p | NFKB1 | hsa-miR-4271    | MAX     | TP53  |
| E2F4 | hsa-miR-146b-5p | TLR4  | hsa-miR-4271    | AR      | TP53  |
| E2F4 | hsa-let-7i-5p   | TLR4  | hsa-miR-4271    | FOSL1   | TP53  |
| E2F4 | hsa-miR-618     | STAT3 | hsa-miR-4271    | SP1     | TP53  |

|      |                 |       |               |         |       |
|------|-----------------|-------|---------------|---------|-------|
| E2F4 | hsa-miR-6875-3p | STAT3 | hsa-miR-4271  | E2F3    | TP53  |
| E2F4 | hsa-miR-3662    | HIF1A | hsa-miR-4271  | SREBF1  | TP53  |
| E2F4 | hsa-miR-922     | STAT3 | hsa-miR-4282  | E2F7    | HIF1A |
| E2F4 | hsa-miR-100-5p  | PTGS2 | hsa-miR-4282  | NR3C1   | HIF1A |
| E2F4 | hsa-miR-106a-5p | TP53  | hsa-miR-4282  | SP4     | HIF1A |
| E2F6 | hsa-miR-18a-5p  | TP53  | hsa-miR-4282  | NFYA    | HIF1A |
| E2F6 | hsa-miR-18a-5p  | HIF1A | hsa-miR-4282  | HBP1    | HIF1A |
| E2F6 | hsa-miR-18a-5p  | SMAD3 | hsa-miR-4282  | RCOR1   | HIF1A |
| E2F6 | hsa-miR-139-5p  | NFKB1 | hsa-miR-4286  | SREBF1  | TP53  |
| E2F6 | hsa-miR-9-5p    | NFKB1 | hsa-miR-4286  | HOXA13  | TP53  |
| E2F6 | hsa-miR-22-3p   | HIF1A | hsa-miR-4290  | HOXA13  | SMAD3 |
| E2F6 | hsa-miR-4470    | HIF1A | hsa-miR-4306  | BACH1   | TP53  |
| E2F6 | hsa-miR-935     | HIF1A | hsa-miR-4306  | HOXC6   | TP53  |
| E2F6 | hsa-miR-19a-3p  | TP53  | hsa-miR-4306  | GATA6   | TP53  |
| E2F6 | hsa-miR-142-3p  | IL6   | hsa-miR-4306  | TFDP1   | TP53  |
| E2F6 | hsa-miR-371b-3p | STAT3 | hsa-miR-4418  | TCF7L2  | HIF1A |
| E2F6 | hsa-miR-6815-3p | HIF1A | hsa-miR-4418  | HBP1    | HIF1A |
| E2F6 | hsa-miR-145-5p  | SMAD3 | hsa-miR-4419a | NFAT5   | TP53  |
| E2F6 | hsa-miR-17-5p   | PTGS2 | hsa-miR-4419a | HOXC6   | TP53  |
| E2F6 | hsa-miR-17-5p   | TGFB1 | hsa-miR-4419a | PAX5    | TP53  |
| E2F6 | hsa-miR-17-5p   | HIF1A | hsa-miR-4419a | GATA6   | TP53  |
| E2F6 | hsa-miR-17-5p   | SMAD3 | hsa-miR-4419a | HOXB13  | TP53  |
| E2F6 | hsa-miR-17-5p   | TP53  | hsa-miR-4438  | VDR     | STAT3 |
| E2F6 | hsa-miR-146a-5p | PTGS2 | hsa-miR-4438  | CREB1   | STAT3 |
| E2F6 | hsa-miR-146a-5p | NFKB1 | hsa-miR-4438  | ZKSCAN1 | STAT3 |
| E2F6 | hsa-miR-200a-3p | TP53  | hsa-miR-4438  | ESR2    | STAT3 |
| E2F6 | hsa-miR-200a-3p | SMAD3 | hsa-miR-4441  | ASCL2   | STAT3 |
| E2F6 | hsa-miR-138-5p  | HIF1A | hsa-miR-4464  | GLI2    | HIF1A |
| E2F6 | hsa-miR-20a-5p  | TP53  | hsa-miR-4464  | MAZ     | HIF1A |
| E2F6 | hsa-miR-20a-5p  | HIF1A | hsa-miR-4464  | KLF9    | HIF1A |
| E2F6 | hsa-miR-34b-5p  | HIF1A | hsa-miR-4487  | ZNF250  | HIF1A |
| E2F6 | hsa-miR-4441    | STAT3 | hsa-miR-4487  | ZFX     | HIF1A |
| E2F6 | hsa-miR-320a    | PTGS2 | hsa-miR-4499  | ZFX     | HIF1A |
| E2F6 | hsa-miR-18a-3p  | SMAD3 | hsa-miR-4516  | BACH2   | STAT3 |
| E2F7 | hsa-miR-889-3p  | HIF1A | hsa-miR-4516  | BACH2   | TP53  |
| E2F7 | hsa-miR-100-5p  | PTGS2 | hsa-miR-4516  | MBD4    | STAT3 |

|      |                  |       |                  |         |       |
|------|------------------|-------|------------------|---------|-------|
| E2F7 | hsa-miR-296-3p   | PTGS2 | hsa-miR-4516     | MBD4    | TP53  |
| E2F7 | hsa-miR-217      | HIF1A | hsa-miR-4516     | GATA6   | STAT3 |
| E2F7 | hsa-miR-6871-3p  | STAT3 | hsa-miR-4516     | GATA6   | TP53  |
| E2F7 | hsa-miR-93-5p    | STAT3 | hsa-miR-4516     | SOX4    | STAT3 |
| E2F7 | hsa-miR-93-5p    | HIF1A | hsa-miR-452-5p   | REST    | TNF   |
| E2F7 | hsa-miR-608      | TP53  | hsa-miR-4531     | BACH2   | TP53  |
| E2F7 | hsa-miR-21-5p    | HIF1A | hsa-miR-454-3p   | IRF1    | TP53  |
| E2F7 | hsa-miR-199a-5p  | PTGS2 | hsa-miR-454-3p   | SMAD4   | TP53  |
| E2F7 | hsa-miR-199a-5p  | HIF1A | hsa-miR-454-3p   | ESR1    | TP53  |
| E2F7 | hsa-miR-3160-3p  | HIF1A | hsa-miR-454-3p   | TCF7L2  | TP53  |
| E2F7 | hsa-miR-337-3p   | STAT3 | hsa-miR-454-3p   | BHLHE40 | TP53  |
| E2F7 | hsa-miR-199a-3p  | PTGS2 | hsa-miR-454-3p   | YY1     | TP53  |
| E2F7 | hsa-let-7a-5p    | IL6   | hsa-miR-4659a-3p | NFIC    | TLR4  |
| E2F7 | hsa-let-7a-5p    | PTGS2 | hsa-miR-4659b-3p | NFIC    | TLR4  |
| E2F7 | hsa-miR-203a-3p  | IL6   | hsa-miR-4662a-5p | KDM5A   | HIF1A |
| E2F7 | hsa-miR-4271     | TP53  | hsa-miR-4684-5p  | FOSL2   | STAT3 |
| E2F7 | hsa-miR-106b-5p  | STAT3 | hsa-miR-4685-5p  | E2F1    | STAT3 |
| E2F7 | hsa-miR-106b-5p  | HIF1A | hsa-miR-4694-3p  | MAFK    | TLR4  |
| E2F7 | hsa-miR-106b-3p  | HIF1A | hsa-miR-4720-3p  | TFAP4   | STAT3 |
| E2F7 | hsa-miR-299-5p   | HIF1A | hsa-miR-4725-3p  | MAX     | TP53  |
| EBF1 | hsa-miR-18a-5p   | TP53  | hsa-miR-4725-3p  | JUND    | TP53  |
| EBF1 | hsa-miR-18a-5p   | HIF1A | hsa-miR-4725-3p  | FOSL1   | TP53  |
| EBF1 | hsa-miR-625-3p   | HIF1A | hsa-miR-4725-3p  | SP1     | TP53  |
| EBF1 | hsa-miR-150-5p   | TP53  | hsa-miR-4725-3p  | E2F3    | TP53  |
| EBF1 | hsa-miR-20a-5p   | TP53  | hsa-miR-4725-3p  | SREBF1  | TP53  |
| EBF1 | hsa-miR-20a-5p   | HIF1A | hsa-miR-4735-3p  | IRF2    | HIF1A |
| EBF1 | hsa-miR-365a-5p  | STAT3 | hsa-miR-4748     | GLI2    | HIF1A |
| EBF1 | hsa-miR-146a-5p  | NFKB1 | hsa-miR-4748     | MAZ     | HIF1A |
| EBF1 | hsa-miR-365a-3p  | IL6   | hsa-miR-4748     | KLF9    | HIF1A |
| EBF1 | hsa-miR-6511a-5p | HIF1A | hsa-miR-4768-5p  | ZNF83   | STAT3 |
| EBF1 | hsa-miR-6871-3p  | STAT3 | hsa-miR-4768-5p  | HOXA13  | STAT3 |
| EBF1 | hsa-miR-4516     | STAT3 | hsa-miR-4768-5p  | STAT5A  | STAT3 |
| EBF1 | hsa-miR-4516     | TP53  | hsa-miR-4768-5p  | POU2F2  | STAT3 |
| EBF1 | hsa-miR-4531     | TP53  | hsa-miR-4778-3p  | NFIC    | STAT3 |
| EBF1 | hsa-miR-1322     | HIF1A | hsa-miR-4778-3p  | JUND    | STAT3 |
| EBF1 | hsa-miR-21-5p    | TGFB1 | hsa-miR-4778-3p  | AR      | STAT3 |



|      |                  |       |                  |         |       |
|------|------------------|-------|------------------|---------|-------|
| EBF1 | hsa-miR-21-5p    | HIF1A | hsa-miR-4778-3p  | KDM5A   | STAT3 |
| EBF1 | hsa-miR-21-5p    | NFKB1 | hsa-miR-4799-5p  | SMAD4   | HIF1A |
| EBF1 | hsa-miR-3529-3p  | TP53  | hsa-miR-484      | SMAD2   | IL2   |
| EBF1 | hsa-miR-30e-5p   | TP53  | hsa-miR-491-5p   | MAZ     | TP53  |
| EBF1 | hsa-miR-6760-5p  | TP53  | hsa-miR-491-5p   | MAZ     | SMAD3 |
| EBF1 | hsa-miR-3662     | HIF1A | hsa-miR-491-5p   | TP53    | SMAD3 |
| EBF1 | hsa-miR-4463     | HIF1A | hsa-miR-491-5p   | ASCL2   | TP53  |
| EGR1 | hsa-miR-132-3p   | PTGS2 | hsa-miR-491-5p   | ASCL2   | SMAD3 |
| EGR1 | hsa-miR-139-5p   | NFKB1 | hsa-miR-491-5p   | UBTF    | TP53  |
| EGR1 | hsa-miR-6842-5p  | TP53  | hsa-miR-491-5p   | UBTF    | SMAD3 |
| EGR1 | hsa-miR-6754-5p  | STAT3 | hsa-miR-491-5p   | HOXC6   | TP53  |
| EGR1 | hsa-miR-877-3p   | STAT3 | hsa-miR-494-3p   | ARNTL   | HIF1A |
| EGR1 | hsa-miR-33a-5p   | HIF1A | hsa-miR-494-3p   | REST    | HIF1A |
| EGR1 | hsa-miR-6808-5p  | HIF1A | hsa-miR-494-3p   | HOXA10  | HIF1A |
| EGR1 | hsa-miR-138-2-3p | STAT3 | hsa-miR-494-3p   | MYC     | HIF1A |
| EGR1 | hsa-miR-22-3p    | HIF1A | hsa-miR-494-3p   | ZEB1    | HIF1A |
| EGR1 | hsa-miR-6760-5p  | TP53  | hsa-miR-494-3p   | ATF3    | HIF1A |
| EGR1 | hsa-miR-6722-3p  | TP53  | hsa-miR-5003-5p  | ETS1    | TP53  |
| EGR1 | hsa-miR-4470     | HIF1A | hsa-miR-5003-5p  | HOXA13  | TP53  |
| EGR1 | hsa-miR-935      | HIF1A | hsa-miR-5003-5p  | TFDP1   | TP53  |
| EGR1 | hsa-miR-622      | TP53  | hsa-miR-500b-3p  | ZBTB7A  | STAT3 |
| EGR1 | hsa-miR-6845-3p  | STAT3 | hsa-miR-509-3-5p | TCF7L2  | HIF1A |
| EGR1 | hsa-miR-30b-5p   | TP53  | hsa-miR-509-3-5p | HBP1    | HIF1A |
| EGR1 | hsa-miR-4418     | HIF1A | hsa-miR-5094     | ZBTB7A  | HIF1A |
| EGR1 | hsa-miR-106b-3p  | HIF1A | hsa-miR-5095     | VDR     | STAT3 |
| EGR1 | hsa-miR-200a-3p  | TP53  | hsa-miR-5095     | FOS     | STAT3 |
| EGR1 | hsa-miR-200a-3p  | SMAD3 | hsa-miR-5095     | CREB1   | STAT3 |
| EGR1 | hsa-miR-93-5p    | TGFB1 | hsa-miR-5095     | ZKSCAN1 | STAT3 |
| EGR1 | hsa-miR-93-5p    | STAT3 | hsa-miR-5095     | ESR2    | STAT3 |
| EGR1 | hsa-miR-93-5p    | HIF1A | hsa-miR-509-5p   | TCF7L2  | HIF1A |
| EGR1 | hsa-miR-6807-3p  | HIF1A | hsa-miR-509-5p   | HBP1    | HIF1A |
| EGR1 | hsa-miR-6815-3p  | HIF1A | hsa-miR-513b-3p  | VEZF1   | TP53  |
| EGR1 | hsa-miR-1234-3p  | STAT3 | hsa-miR-5193     | ARID3A  | TP53  |
| EGR1 | hsa-miR-6893-5p  | HIF1A | hsa-miR-5193     | HOXA13  | TP53  |
| EGR1 | hsa-miR-1910-3p  | HIF1A | hsa-miR-5193     | SPIB    | TP53  |
| EGR1 | hsa-miR-5193     | TP53  | hsa-miR-5193     | TCF7L2  | TP53  |

|      |                 |       |                 |        |       |
|------|-----------------|-------|-----------------|--------|-------|
| EGR1 | hsa-miR-663a    | TGFB1 | hsa-miR-5193    | NKX2-2 | TP53  |
| EGR1 | hsa-miR-7151-3p | STAT3 | hsa-miR-5197-5p | HOXA13 | TP53  |
| EGR1 | hsa-miR-203a-3p | TNF   | hsa-miR-5197-5p | ZFH3   | TP53  |
| EGR1 | hsa-miR-144-3p  | TGFB1 | hsa-miR-5197-5p | E2F3   | TP53  |
| EGR1 | hsa-miR-146b-5p | NFKB1 | hsa-miR-519c-3p | NFAT5  | HIF1A |
| EGR1 | hsa-miR-9-5p    | NFKB1 | hsa-miR-519c-3p | TFAP4  | HIF1A |
| EGR1 | hsa-miR-145-5p  | SMAD3 | hsa-miR-519c-3p | SMAD4  | HIF1A |
| EGR1 | hsa-miR-4487    | HIF1A | hsa-miR-519c-3p | UBTF   | HIF1A |
| EGR1 | hsa-miR-92b-3p  | SMAD3 | hsa-miR-519c-3p | HBP1   | HIF1A |
| EGR1 | hsa-miR-6807-5p | STAT3 | hsa-miR-519c-3p | RUNX3  | HIF1A |
| EGR1 | hsa-miR-130b-3p | STAT3 | hsa-miR-519c-3p | TCF7L2 | HIF1A |
| EGR1 | hsa-miR-138-5p  | HIF1A | hsa-miR-519c-3p | GATA6  | HIF1A |
| EGR1 | hsa-miR-34b-5p  | HIF1A | hsa-miR-519c-3p | NR2F2  | HIF1A |
| EGR1 | hsa-miR-193b-3p | SMAD3 | hsa-miR-519c-3p | IRF2   | HIF1A |
| EGR1 | hsa-miR-337-3p  | STAT3 | hsa-miR-519c-3p | ESR1   | HIF1A |
| EGR1 | hsa-miR-320a    | PTGS2 | hsa-miR-519d-3p | CLOCK  | STAT3 |
| EGR1 | hsa-miR-106b-5p | STAT3 | hsa-miR-519d-3p | SMAD4  | STAT3 |
| EGR1 | hsa-miR-106b-5p | HIF1A | hsa-miR-519d-3p | SMAD4  | HIF1A |
| EGR1 | hsa-miR-5003-5p | TP53  | hsa-miR-519d-3p | SOX4   | STAT3 |
| EGR2 | hsa-miR-2682-5p | HIF1A | hsa-miR-519d-3p | AFF1   | HIF1A |
| EGR2 | hsa-miR-137     | PTGS2 | hsa-miR-519d-3p | KLF3   | HIF1A |
| EHF  | hsa-miR-106b-5p | STAT3 | hsa-miR-519d-3p | TCF4   | STAT3 |
| EHF  | hsa-miR-106b-5p | HIF1A | hsa-miR-519d-3p | TCF4   | HIF1A |
| EHF  | hsa-miR-106b-3p | HIF1A | hsa-miR-519d-3p | ZBTB7A | STAT3 |
| EHF  | hsa-miR-150-5p  | TP53  | hsa-miR-519d-3p | ZBTB7A | HIF1A |
| EHF  | hsa-miR-1908-5p | PTGS2 | hsa-miR-519d-3p | ELK4   | STAT3 |
| EHF  | hsa-miR-93-5p   | TGFB1 | hsa-miR-519d-3p | SP4    | STAT3 |
| EHF  | hsa-miR-93-5p   | STAT3 | hsa-miR-519d-3p | SP4    | HIF1A |
| EHF  | hsa-miR-93-5p   | HIF1A | hsa-miR-519d-3p | CREB1  | STAT3 |
| ELF1 | hsa-miR-132-3p  | PTGS2 | hsa-miR-519d-3p | CREB1  | HIF1A |
| ELF1 | hsa-miR-9-5p    | NFKB1 | hsa-miR-519d-3p | REST   | STAT3 |
| ELF1 | hsa-miR-139-5p  | NFKB1 | hsa-miR-519d-3p | REST   | HIF1A |
| ELF1 | hsa-miR-210-3p  | NFKB1 | hsa-miR-519d-3p | GATA6  | STAT3 |
| ELF1 | hsa-miR-210-3p  | HIF1A | hsa-miR-519d-3p | GATA6  | HIF1A |
| ELF1 | hsa-miR-4650-5p | TP53  | hsa-miR-519d-3p | ESR2   | STAT3 |
| ELF1 | hsa-miR-379-3p  | PTGS2 | hsa-miR-519d-3p | NFAT5  | STAT3 |

|      |                  |       |                  |        |       |
|------|------------------|-------|------------------|--------|-------|
| ELF1 | hsa-miR-6837-5p  | STAT3 | hsa-miR-519d-3p  | NFAT5  | HIF1A |
| ELF1 | hsa-miR-365a-5p  | STAT3 | hsa-miR-519d-3p  | E2F3   | HIF1A |
| ELF1 | hsa-miR-30d-5p   | TP53  | hsa-miR-519d-3p  | E2F2   | HIF1A |
| ELF1 | hsa-miR-6809-3p  | STAT3 | hsa-miR-519d-3p  | E2F1   | STAT3 |
| ELF1 | hsa-miR-155-5p   | NFKB1 | hsa-miR-519d-3p  | E2F1   | HIF1A |
| ELF1 | hsa-miR-155-5p   | SMAD3 | hsa-miR-519d-3p  | WHSC1  | STAT3 |
| ELF1 | hsa-miR-143-3p   | PTGS2 | hsa-miR-519d-3p  | WHSC1  | HIF1A |
| ELF1 | hsa-miR-143-3p   | TNF   | hsa-miR-519d-3p  | TCF7L2 | STAT3 |
| ELF1 | hsa-miR-143-3p   | SMAD3 | hsa-miR-519d-3p  | TCF7L2 | HIF1A |
| ELF1 | hsa-miR-203a-3p  | TNF   | hsa-miR-519d-3p  | HBP1   | STAT3 |
| ELF1 | hsa-miR-199b-5p  | HIF1A | hsa-miR-519d-3p  | HBP1   | HIF1A |
| ELF1 | hsa-miR-150-5p   | TP53  | hsa-miR-519d-3p  | RUNX3  | STAT3 |
| ELF1 | hsa-miR-22-3p    | HIF1A | hsa-miR-519d-3p  | RUNX3  | HIF1A |
| ELF1 | hsa-miR-4470     | HIF1A | hsa-miR-519d-3p  | MXI1   | STAT3 |
| ELF1 | hsa-miR-324-3p   | TGFB1 | hsa-miR-519d-3p  | MXI1   | HIF1A |
| ELF1 | hsa-miR-625-3p   | HIF1A | hsa-miR-526b-5p  | GATA6  | TLR4  |
| ELF1 | hsa-miR-1908-5p  | PTGS2 | hsa-miR-548ah-5p | NFAT5  | HIF1A |
| ELF1 | hsa-miR-6789-3p  | STAT3 | hsa-miR-548ah-5p | SP4    | HIF1A |
| ELF1 | hsa-miR-4531     | TP53  | hsa-miR-548ah-5p | REST   | HIF1A |
| ELF1 | hsa-miR-199a-3p  | PTGS2 | hsa-miR-548ah-5p | HBP1   | HIF1A |
| ELF1 | hsa-miR-6815-3p  | HIF1A | hsa-miR-548ah-5p | RUNX3  | HIF1A |
| ELF1 | hsa-miR-199a-5p  | PTGS2 | hsa-miR-548g-3p  | MXI1   | TLR4  |
| ELF1 | hsa-miR-199a-5p  | HIF1A | hsa-miR-558      | ZNF250 | PTGS2 |
| ELF1 | hsa-miR-199a-5p  | NFKB1 | hsa-miR-558      | ZNF250 | HIF1A |
| ELF1 | hsa-miR-145-5p   | SMAD3 | hsa-miR-558      | ZFX    | HIF1A |
| ELF1 | hsa-miR-449c-5p  | HIF1A | hsa-miR-558      | HIF1A  | PTGS2 |
| ELF1 | hsa-miR-5193     | TP53  | hsa-miR-558      | RUNX3  | PTGS2 |
| ELF1 | hsa-miR-663a     | TGFB1 | hsa-miR-558      | RUNX3  | HIF1A |
| ELF1 | hsa-miR-138-2-3p | STAT3 | hsa-miR-5581-3p  | FOS    | STAT3 |
| ELF1 | hsa-miR-589-5p   | PTGS2 | hsa-miR-5681a    | ZNF83  | STAT3 |
| ELF1 | hsa-miR-144-3p   | TGFB1 | hsa-miR-5681a    | NFAT5  | STAT3 |
| ELF1 | hsa-let-7b-5p    | PTGS2 | hsa-miR-5681b    | WHSC1  | HIF1A |
| ELF1 | hsa-let-7b-5p    | HIF1A | hsa-miR-5692a    | MAFK   | HIF1A |
| ELF1 | hsa-miR-6875-3p  | STAT3 | hsa-miR-5702     | CEBPG  | TP53  |
| ELF1 | hsa-miR-618      | STAT3 | hsa-miR-576-3p   | NFIC   | HIF1A |
| ELF1 | hsa-miR-4487     | HIF1A | hsa-miR-576-3p   | HINFP  | HIF1A |

|      |                 |       |                 |        |       |
|------|-----------------|-------|-----------------|--------|-------|
| ELF1 | hsa-miR-92b-3p  | SMAD3 | hsa-miR-605-5p  | NR2C2  | TP53  |
| ELF1 | hsa-miR-124-3p  | PTGS2 | hsa-miR-605-5p  | HOXA13 | TP53  |
| ELF1 | hsa-miR-124-3p  | STAT3 | hsa-miR-605-5p  | RUNX1  | TP53  |
| ELF1 | hsa-miR-1234-3p | STAT3 | hsa-miR-605-5p  | STAT1  | TP53  |
| ELF1 | hsa-miR-138-5p  | HIF1A | hsa-miR-6077    | GATA6  | TLR4  |
| ELF1 | hsa-miR-1181    | STAT3 | hsa-miR-6077    | RELA   | TLR4  |
| ELF1 | hsa-miR-4441    | STAT3 | hsa-miR-6077    | FOS    | TLR4  |
| ELF1 | hsa-miR-4748    | HIF1A | hsa-miR-608     | MAX    | TP53  |
| ELF1 | hsa-miR-130b-3p | STAT3 | hsa-miR-608     | UBTF   | TP53  |
| ELF1 | hsa-miR-6872-3p | STAT3 | hsa-miR-608     | NKX2-2 | TP53  |
| ELF1 | hsa-miR-320a    | PTGS2 | hsa-miR-6130    | NFAT5  | TP53  |
| ELF1 | hsa-miR-195-5p  | SMAD3 | hsa-miR-6130    | HOXC6  | TP53  |
| ELF1 | hsa-miR-24-3p   | TGFB1 | hsa-miR-6130    | PAX5   | TP53  |
| ELF2 | hsa-miR-9-5p    | NFKB1 | hsa-miR-6130    | GATA6  | TP53  |
| ELF2 | hsa-let-7a-5p   | PTGS2 | hsa-miR-6130    | HOXB13 | TP53  |
| ELF2 | hsa-let-7a-5p   | NFKB1 | hsa-miR-6133    | NFAT5  | TP53  |
| ELF2 | hsa-let-7b-5p   | PTGS2 | hsa-miR-6133    | HOXC6  | TP53  |
| ELK1 | hsa-miR-210-3p  | FOXP3 | hsa-miR-6133    | PAX5   | TP53  |
| ELK1 | hsa-miR-210-3p  | HIF1A | hsa-miR-6133    | GATA6  | TP53  |
| ELK1 | hsa-miR-210-3p  | NFKB1 | hsa-miR-6133    | HOXB13 | TP53  |
| ELK1 | hsa-miR-1908-5p | PTGS2 | hsa-miR-618     | NR3C1  | STAT3 |
| ELK1 | hsa-miR-365a-5p | STAT3 | hsa-miR-618     | KDM5A  | STAT3 |
| ELK1 | hsa-miR-193b-3p | SMAD3 | hsa-miR-618     | SOX4   | STAT3 |
| ELK1 | hsa-miR-4470    | HIF1A | hsa-miR-622     | MYC    | TP53  |
| ELK1 | hsa-miR-26a-5p  | IL6   | hsa-miR-625-3p  | XBP1   | HIF1A |
| ELK1 | hsa-miR-142-3p  | IL6   | hsa-miR-633     | JUN    | TGFB1 |
| ELK1 | hsa-miR-223-3p  | IL6   | hsa-miR-652-3p  | NFAT5  | PTGS2 |
| ELK1 | hsa-miR-223-3p  | TP53  | hsa-miR-663a    | JUNB   | TGFB1 |
| ELK1 | hsa-miR-21-5p   | TGFB1 | hsa-miR-663a    | KLF4   | TGFB1 |
| ELK1 | hsa-miR-21-5p   | HIF1A | hsa-miR-6722-3p | ARID3A | TP53  |
| ELK1 | hsa-miR-21-5p   | NFKB1 | hsa-miR-6722-3p | MBD4   | TP53  |
| ELK1 | hsa-miR-365a-3p | IL6   | hsa-miR-6754-5p | ASCL2  | STAT3 |
| ELK1 | hsa-miR-144-3p  | TGFB1 | hsa-miR-6755-5p | POU2F2 | HIF1A |
| ELK1 | hsa-miR-124-3p  | IL6   | hsa-miR-6760-5p | NFAT5  | TP53  |
| ELK1 | hsa-miR-124-3p  | PTGS2 | hsa-miR-6760-5p | BARHL1 | TP53  |
| ELK1 | hsa-miR-124-3p  | STAT3 | hsa-miR-6760-5p | HOXC6  | TP53  |

|       |                 |       |                 |         |       |
|-------|-----------------|-------|-----------------|---------|-------|
| ELK1  | hsa-miR-20a-5p  | TP53  | hsa-miR-6760-5p | TFDP1   | TP53  |
| ELK1  | hsa-miR-20a-5p  | HIF1A | hsa-miR-6789-3p | ZKSCAN1 | STAT3 |
| ELK1  | hsa-miR-155-5p  | IL6   | hsa-miR-6807-3p | HINFP   | HIF1A |
| ELK1  | hsa-miR-155-5p  | NFKB1 | hsa-miR-6807-3p | TCF7L2  | HIF1A |
| ELK1  | hsa-miR-155-5p  | SMAD3 | hsa-miR-6807-5p | VDR     | STAT3 |
| ELK1  | hsa-miR-320a    | PTGS2 | hsa-miR-6807-5p | MNT     | STAT3 |
| ELK3  | hsa-miR-21-5p   | TGFB1 | hsa-miR-6807-5p | CREB1   | STAT3 |
| ELK3  | hsa-miR-21-5p   | NFKB1 | hsa-miR-6807-5p | ZFP42   | STAT3 |
| ELK3  | hsa-miR-24-3p   | TGFB1 | hsa-miR-6807-5p | FOSL2   | STAT3 |
| ELK3  | hsa-miR-26b-5p  | PTGS2 | hsa-miR-6807-5p | ESR2    | STAT3 |
| ELK3  | hsa-miR-26b-5p  | NFKB1 | hsa-miR-6808-5p | MXI1    | HIF1A |
| ELK3  | hsa-miR-155-5p  | NFKB1 | hsa-miR-6808-5p | FOSL2   | HIF1A |
| ELK3  | hsa-miR-137     | PTGS2 | hsa-miR-6808-5p | ZBTB7A  | HIF1A |
| ELK3  | hsa-let-7b-5p   | PTGS2 | hsa-miR-6809-3p | ARID3A  | STAT3 |
| ELK4  | hsa-let-7i-5p   | TLR4  | hsa-miR-6809-3p | ZNF83   | STAT3 |
| ELK4  | hsa-miR-320a    | PTGS2 | hsa-miR-6809-3p | HOXA13  | STAT3 |
| ELK4  | hsa-miR-1181    | STAT3 | hsa-miR-6809-3p | STAT5A  | STAT3 |
| EOMES | hsa-miR-4650-5p | TP53  | hsa-miR-6809-3p | POU2F2  | STAT3 |
| EOMES | hsa-miR-4768-5p | STAT3 | hsa-miR-6809-3p | KDM5A   | STAT3 |
| EOMES | hsa-miR-122-5p  | TGFB1 | hsa-miR-6809-3p | MTA3    | STAT3 |
| EOMES | hsa-miR-5702    | TP53  | hsa-miR-6815-3p | NFAT5   | HIF1A |
| EOMES | hsa-miR-21-5p   | TGFB1 | hsa-miR-6837-5p | E2F1    | STAT3 |
| EOMES | hsa-miR-21-5p   | NFKB1 | hsa-miR-6842-5p | RUNX3   | TP53  |
| EOMES | hsa-miR-874-3p  | STAT3 | hsa-miR-6845-3p | SPI1    | STAT3 |
| EOMES | hsa-let-7a-5p   | IL6   | hsa-miR-6845-3p | ZNF83   | STAT3 |
| EOMES | hsa-let-7a-5p   | NFKB1 | hsa-miR-6845-3p | HOXA13  | STAT3 |
| EOMES | hsa-miR-618     | STAT3 | hsa-miR-6845-3p | NFYA    | STAT3 |
| ERF   | hsa-miR-6806-5p | HIF1A | hsa-miR-6845-3p | MTA3    | STAT3 |
| ERG   | hsa-miR-18a-5p  | TP53  | hsa-miR-6878-5p | NFAT5   | STAT3 |
| ERG   | hsa-miR-18a-5p  | HIF1A | hsa-miR-6878-5p | MBD4    | STAT3 |
| ERG   | hsa-miR-3934-5p | PTGS2 | hsa-miR-6878-5p | AR      | STAT3 |
| ERG   | hsa-miR-9-5p    | NFKB1 | hsa-miR-6878-5p | FOSL2   | STAT3 |
| ERG   | hsa-miR-210-3p  | NFKB1 | hsa-miR-6893-5p | MXI1    | HIF1A |
| ERG   | hsa-miR-210-3p  | HIF1A | hsa-miR-6893-5p | FOSL2   | HIF1A |
| ERG   | hsa-miR-4799-5p | HIF1A | hsa-miR-6893-5p | ZBTB7A  | HIF1A |
| ERG   | hsa-miR-1908-5p | PTGS2 | hsa-miR-7110-3p | STAT5A  | STAT3 |

|     |                 |       |                  |         |       |
|-----|-----------------|-------|------------------|---------|-------|
| ERG | hsa-miR-1-3p    | TLR4  | hsa-miR-7110-3p  | ARNT    | STAT3 |
| ERG | hsa-miR-100-5p  | PTGS2 | hsa-miR-7110-3p  | MTA3    | STAT3 |
| ERG | hsa-miR-942-5p  | TLR4  | hsa-miR-7113-5p  | BHLHE40 | STAT3 |
| ERG | hsa-miR-16-5p   | PTGS2 | hsa-miR-7113-5p  | ASCL2   | STAT3 |
| ERG | hsa-miR-16-5p   | TP53  | hsa-miR-7113-5p  | E2F1    | STAT3 |
| ERG | hsa-miR-16-5p   | NFKB1 | hsa-miR-7151-3p  | VDR     | STAT3 |
| ERG | hsa-miR-214-3p  | TP53  | hsa-miR-7151-3p  | FOS     | STAT3 |
| ERG | hsa-miR-7-5p    | TLR4  | hsa-miR-7151-3p  | CREB1   | STAT3 |
| ERG | hsa-miR-5681a   | STAT3 | hsa-miR-7151-3p  | ZKSCAN1 | STAT3 |
| ERG | hsa-miR-484     | IL2   | hsa-miR-7151-3p  | ESR2    | STAT3 |
| ERG | hsa-miR-935     | HIF1A | hsa-miR-744-5p   | FOXO3   | PTGS2 |
| ERG | hsa-miR-19a-3p  | TP53  | hsa-miR-744-5p   | SREBF1  | PTGS2 |
| ERG | hsa-miR-4742-3p | TLR4  | hsa-miR-874-3p   | PRDM1   | STAT3 |
| ERG | hsa-miR-2682-5p | HIF1A | hsa-miR-874-3p   | ESR1    | STAT3 |
| ERG | hsa-miR-4738-3p | TLR4  | hsa-miR-877-3p   | ZBTB7A  | STAT3 |
| ERG | hsa-miR-92a-3p  | NFKB1 | hsa-miR-877-3p   | ARNT    | STAT3 |
| ERG | hsa-miR-5681b   | HIF1A | hsa-miR-877-3p   | BCLAF1  | STAT3 |
| ERG | hsa-miR-4516    | STAT3 | hsa-miR-877-3p   | CUX1    | STAT3 |
| ERG | hsa-miR-4516    | TP53  | hsa-miR-877-3p   | PRDM1   | STAT3 |
| ERG | hsa-miR-3165    | TP53  | hsa-miR-877-3p   | GMEB2   | STAT3 |
| ERG | hsa-miR-5702    | TP53  | hsa-miR-877-3p   | PBX1    | STAT3 |
| ERG | hsa-let-7i-5p   | TLR4  | hsa-miR-889-3p   | NFAT5   | HIF1A |
| ERG | hsa-miR-6815-3p | HIF1A | hsa-miR-889-3p   | AFF1    | HIF1A |
| ERG | hsa-miR-137     | PTGS2 | hsa-miR-922      | SP1     | STAT3 |
| ERG | hsa-miR-874-3p  | STAT3 | hsa-miR-922      | TFAP2C  | STAT3 |
| ERG | hsa-miR-19b-3p  | TP53  | hsa-miR-922      | MNT     | STAT3 |
| ERG | hsa-miR-5193    | TP53  | hsa-miR-922      | MBD4    | STAT3 |
| ERG | hsa-miR-17-5p   | PTGS2 | hsa-miR-922      | RUNX1   | STAT3 |
| ERG | hsa-miR-17-5p   | TP53  | hsa-miR-922      | GABPA   | STAT3 |
| ERG | hsa-miR-17-5p   | HIF1A | hsa-miR-92a-1-5p | MAZ     | TP53  |
| ERG | hsa-let-7a-5p   | PTGS2 | hsa-miR-92a-1-5p | RFX1    | TP53  |
| ERG | hsa-let-7a-5p   | NFKB1 | hsa-miR-92a-2-5p | SIX5    | TP53  |
| ERG | hsa-miR-149-3p  | TP53  | hsa-miR-92a-2-5p | HOXC6   | TP53  |
| ERG | hsa-miR-589-5p  | PTGS2 | hsa-miR-92a-2-5p | FOSL1   | TP53  |
| ERG | hsa-miR-6789-3p | STAT3 | hsa-miR-92a-2-5p | NKX2-2  | TP53  |
| ERG | hsa-miR-132-3p  | PTGS2 | hsa-miR-92a-2-5p | MYC     | TP53  |

|      |                  |       |                |        |       |
|------|------------------|-------|----------------|--------|-------|
| ERG  | hsa-miR-320a     | PTGS2 | hsa-miR-92a-3p | MYBL2  | NFKB1 |
| ERG  | hsa-miR-124-3p   | PTGS2 | hsa-miR-92a-3p | TP63   | NFKB1 |
| ERG  | hsa-miR-124-3p   | STAT3 | hsa-miR-92a-3p | SRF    | NFKB1 |
| ERG  | hsa-miR-4279     | TLR4  | hsa-miR-92a-3p | CUX1   | NFKB1 |
| ERG  | hsa-miR-20a-5p   | TP53  | hsa-miR-92a-3p | GATA6  | NFKB1 |
| ERG  | hsa-miR-20a-5p   | HIF1A | hsa-miR-92a-3p | WHSC1  | NFKB1 |
| ERG  | hsa-miR-1181     | STAT3 | hsa-miR-92a-3p | MEF2C  | NFKB1 |
| ERG  | hsa-miR-155-5p   | NFKB1 | hsa-miR-92a-3p | GABPA  | NFKB1 |
| ERG  | hsa-miR-155-5p   | IL2   | hsa-miR-92b-3p | HOXA13 | SMAD3 |
| ERG  | hsa-miR-101-3p   | PTGS2 | hsa-miR-92b-3p | NFYB   | SMAD3 |
| ERG  | hsa-miR-92a-1-5p | TP53  | hsa-miR-92b-3p | GATA6  | SMAD3 |
| ERG  | hsa-miR-7158-5p  | STAT3 | hsa-miR-935    | TFDP1  | HIF1A |
| ERG  | hsa-miR-3121-3p  | HIF1A | hsa-miR-93-5p  | CLOCK  | STAT3 |
| ESR1 | hsa-miR-1178-3p  | STAT3 | hsa-miR-93-5p  | SMAD4  | TGFB1 |
| ESR1 | hsa-miR-3165     | TP53  | hsa-miR-93-5p  | SMAD4  | STAT3 |
| ESR1 | hsa-miR-3934-5p  | PTGS2 | hsa-miR-93-5p  | SMAD4  | HIF1A |
| ESR1 | hsa-miR-210-3p   | NFKB1 | hsa-miR-93-5p  | HIF1A  | TGFB1 |
| ESR1 | hsa-miR-210-3p   | HIF1A | hsa-miR-93-5p  | SOX4   | STAT3 |
| ESR1 | hsa-miR-125a-5p  | TP53  | hsa-miR-93-5p  | XBP1   | STAT3 |
| ESR1 | hsa-miR-4778-3p  | STAT3 | hsa-miR-93-5p  | XBP1   | HIF1A |
| ESR1 | hsa-miR-143-3p   | PTGS2 | hsa-miR-93-5p  | ZNF143 | TGFB1 |
| ESR1 | hsa-miR-214-3p   | TP53  | hsa-miR-93-5p  | ZNF143 | STAT3 |
| ESR1 | hsa-miR-149-3p   | TP53  | hsa-miR-93-5p  | ZNF143 | HIF1A |
| ESR1 | hsa-miR-4306     | TP53  | hsa-miR-93-5p  | ZNF384 | TGFB1 |
| ESR1 | hsa-miR-6722-3p  | TP53  | hsa-miR-93-5p  | ZNF384 | STAT3 |
| ESR1 | hsa-miR-4470     | HIF1A | hsa-miR-93-5p  | ZNF384 | HIF1A |
| ESR1 | hsa-miR-199a-3p  | PTGS2 | hsa-miR-93-5p  | EGR2   | TGFB1 |
| ESR1 | hsa-miR-6845-3p  | STAT3 | hsa-miR-93-5p  | EGR2   | STAT3 |
| ESR1 | hsa-miR-92a-3p   | NFKB1 | hsa-miR-93-5p  | EGR2   | HIF1A |
| ESR1 | hsa-miR-3160-3p  | HIF1A | hsa-miR-93-5p  | JUN    | TGFB1 |
| ESR1 | hsa-miR-4270     | STAT3 | hsa-miR-93-5p  | JUN    | STAT3 |
| ESR1 | hsa-miR-324-3p   | TGFB1 | hsa-miR-93-5p  | JUN    | HIF1A |
| ESR1 | hsa-miR-5681a    | STAT3 | hsa-miR-93-5p  | AFF1   | HIF1A |
| ESR1 | hsa-miR-5681b    | HIF1A | hsa-miR-93-5p  | GLI3   | STAT3 |
| ESR1 | hsa-let-7i-5p    | TLR4  | hsa-miR-93-5p  | GLI3   | HIF1A |
| ESR1 | hsa-miR-4487     | HIF1A | hsa-miR-93-5p  | KLF3   | HIF1A |

|      |                  |       |               |        |       |
|------|------------------|-------|---------------|--------|-------|
| ESR1 | hsa-miR-7113-5p  | STAT3 | hsa-miR-93-5p | MXD1   | STAT3 |
| ESR1 | hsa-miR-4659b-3p | TLR4  | hsa-miR-93-5p | KLF9   | TGFB1 |
| ESR1 | hsa-miR-4662a-5p | HIF1A | hsa-miR-93-5p | KLF9   | STAT3 |
| ESR1 | hsa-miR-124-3p   | PTGS2 | hsa-miR-93-5p | KLF9   | HIF1A |
| ESR1 | hsa-miR-124-3p   | STAT3 | hsa-miR-93-5p | TCF4   | TGFB1 |
| ESR1 | hsa-miR-744-5p   | PTGS2 | hsa-miR-93-5p | TCF4   | STAT3 |
| ESR1 | hsa-miR-744-5p   | TGFB1 | hsa-miR-93-5p | TCF4   | HIF1A |
| ESR1 | hsa-miR-365b-5p  | STAT3 | hsa-miR-93-5p | ZBTB7A | TGFB1 |
| ESR1 | hsa-miR-139-5p   | NFKB1 | hsa-miR-93-5p | ZBTB7A | STAT3 |
| ESR1 | hsa-miR-491-5p   | TP53  | hsa-miR-93-5p | ZBTB7A | HIF1A |
| ESR1 | hsa-miR-4799-5p  | HIF1A | hsa-miR-93-5p | ZBTB4  | TGFB1 |
| ESR1 | hsa-miR-4685-5p  | STAT3 | hsa-miR-93-5p | SP4    | TGFB1 |
| ESR1 | hsa-miR-6754-5p  | STAT3 | hsa-miR-93-5p | SP4    | STAT3 |
| ESR1 | hsa-miR-1181     | STAT3 | hsa-miR-93-5p | SP4    | HIF1A |
| ESR1 | hsa-miR-24-3p    | TGFB1 | hsa-miR-93-5p | REST   | TGFB1 |
| ESR1 | hsa-miR-6511a-5p | HIF1A | hsa-miR-93-5p | REST   | STAT3 |
| ESR1 | hsa-miR-4738-3p  | TLR4  | hsa-miR-93-5p | REST   | HIF1A |
| ESR1 | hsa-miR-4418     | HIF1A | hsa-miR-93-5p | GATA6  | TGFB1 |
| ESR1 | hsa-miR-6871-3p  | STAT3 | hsa-miR-93-5p | GATA6  | STAT3 |
| ESR1 | hsa-miR-92a-1-5p | TP53  | hsa-miR-93-5p | GATA6  | HIF1A |
| ESR1 | hsa-miR-8071     | TP53  | hsa-miR-93-5p | ESR2   | STAT3 |
| ESR1 | hsa-miR-6893-5p  | HIF1A | hsa-miR-93-5p | PBX3   | TGFB1 |
| ESR1 | hsa-miR-337-3p   | STAT3 | hsa-miR-93-5p | PBX3   | STAT3 |
| ESR1 | hsa-miR-663a     | TGFB1 | hsa-miR-93-5p | PBX3   | HIF1A |
| ESR1 | hsa-miR-6789-3p  | STAT3 | hsa-miR-93-5p | IRF1   | TGFB1 |
| ESR1 | hsa-miR-6872-3p  | STAT3 | hsa-miR-93-5p | IRF1   | STAT3 |
| ESR1 | hsa-miR-6875-3p  | STAT3 | hsa-miR-93-5p | IRF1   | HIF1A |
| ESR1 | hsa-miR-200a-3p  | TP53  | hsa-miR-93-5p | E2F2   | HIF1A |
| ESR1 | hsa-miR-329-5p   | HIF1A | hsa-miR-93-5p | E2F1   | STAT3 |
| ESR1 | hsa-miR-630      | TLR4  | hsa-miR-93-5p | E2F1   | HIF1A |
| ESR1 | hsa-miR-320a     | PTGS2 | hsa-miR-93-5p | WHSC1  | STAT3 |
| ESR1 | hsa-miR-4694-3p  | TLR4  | hsa-miR-93-5p | WHSC1  | HIF1A |
| ESR1 | hsa-miR-1908-5p  | PTGS2 | hsa-miR-93-5p | TCF7L2 | TGFB1 |
| ESR1 | hsa-miR-5193     | TP53  | hsa-miR-93-5p | TCF7L2 | STAT3 |
| ESR1 | hsa-miR-151a-3p  | HIF1A | hsa-miR-93-5p | TCF7L2 | HIF1A |
| ESR1 | hsa-miR-10b-5p   | TP53  | hsa-miR-93-5p | HBP1   | TGFB1 |



|      |                  |       |                |        |       |
|------|------------------|-------|----------------|--------|-------|
| ESR1 | hsa-miR-6809-3p  | STAT3 | hsa-miR-93-5p  | HBP1   | STAT3 |
| ESR1 | hsa-miR-6808-5p  | HIF1A | hsa-miR-93-5p  | HBP1   | HIF1A |
| ESR1 | hsa-miR-16-5p    | PTGS2 | hsa-miR-93-5p  | RUNX3  | TGFB1 |
| ESR1 | hsa-miR-16-5p    | TP53  | hsa-miR-93-5p  | RUNX3  | STAT3 |
| ESR1 | hsa-miR-16-5p    | NFKB1 | hsa-miR-93-5p  | RUNX3  | HIF1A |
| ESR1 | hsa-miR-6806-5p  | HIF1A | hsa-miR-93-5p  | ELK4   | STAT3 |
| ESR1 | hsa-miR-5197-5p  | TP53  | hsa-miR-93-5p  | ZMIZ1  | TGFB1 |
| ESR1 | hsa-miR-589-5p   | PTGS2 | hsa-miR-93-5p  | ZMIZ1  | STAT3 |
| ESR1 | hsa-miR-935      | HIF1A | hsa-miR-93-5p  | ZMIZ1  | HIF1A |
| ESR1 | hsa-miR-4531     | TP53  | hsa-miR-940    | ZBTB7A | HIF1A |
| ESR1 | hsa-miR-132-3p   | PTGS2 | hsa-miR-940    | MXI1   | HIF1A |
| ESR1 | hsa-miR-6815-3p  | HIF1A | hsa-miR-940    | FOSL2  | HIF1A |
| ESR1 | hsa-miR-3074-3p  | HIF1A | hsa-miR-940    | MYC    | HIF1A |
| ESR1 | hsa-miR-1468-3p  | TLR4  | hsa-miR-942-5p | SPIB   | TLR4  |
| ESR1 | hsa-miR-17-5p    | PTGS2 | hsa-miR-9-5p   | FOXP1  | NFKB1 |
| ESR1 | hsa-miR-17-5p    | TP53  | hsa-miR-9-5p   | TAL1   | NFKB1 |
| ESR1 | hsa-miR-17-5p    | HIF1A | hsa-miR-9-5p   | HBP1   | NFKB1 |
| ESR1 | hsa-miR-17-5p    | TGFB1 | hsa-miR-9-5p   | POU2F2 | NFKB1 |
| ESR1 | hsa-let-7a-5p    | PTGS2 | hsa-miR-98-5p  | TEAD4  | IL6   |
| ESR1 | hsa-let-7a-5p    | NFKB1 | hsa-miR-98-5p  | BACH1  | IL6   |
| ESR1 | hsa-miR-4735-3p  | HIF1A | hsa-miR-98-5p  | SOX4   | IL6   |
| ESR1 | hsa-miR-1-3p     | TLR4  | hsa-miR-98-5p  | MYC    | IL6   |
| ESR1 | hsa-miR-618      | STAT3 | hsa-miR-98-5p  | GATA6  | IL6   |
| ESR1 | hsa-miR-4279     | TLR4  | hsa-miR-98-5p  | ARID3A | IL6   |
| ESR1 | hsa-miR-365a-5p  | STAT3 | hsa-miR-98-5p  | E2F6   | IL6   |
| ESR1 | hsa-miR-608      | TP53  | hsa-miR-98-5p  | E2F4   | IL6   |
| ESR1 | hsa-miR-155-5p   | NFKB1 | hsa-miR-98-5p  | AHR    | IL6   |
| ESR1 | hsa-miR-424-5p   | HIF1A | hsa-miR-99a-5p | HOXA1  | PTGS2 |
| ESR1 | hsa-miR-500b-3p  | STAT3 | hsa-miR-99a-5p | FOSL2  | PTGS2 |
| ESR1 | hsa-miR-6837-5p  | STAT3 |                |        |       |
| ESR1 | hsa-miR-4698     | TLR4  |                |        |       |
| ESR1 | hsa-miR-1234-3p  | STAT3 |                |        |       |
| ESR1 | hsa-let-7e-5p    | STAT3 |                |        |       |
| ESR1 | hsa-miR-30b-5p   | TP53  |                |        |       |
| ESR1 | hsa-miR-4659a-3p | TLR4  |                |        |       |
| ESR1 | hsa-miR-223-3p   | TP53  |                |        |       |

|      |                 |       |
|------|-----------------|-------|
| ESR1 | hsa-miR-21-5p   | TGFB1 |
| ESR1 | hsa-miR-21-5p   | TLR4  |
| ESR1 | hsa-miR-21-5p   | HIF1A |
| ESR1 | hsa-miR-21-5p   | NFKB1 |
| ESR1 | hsa-miR-211-5p  | TGFB1 |
| ESR1 | hsa-miR-199a-5p | PTGS2 |
| ESR1 | hsa-miR-199a-5p | HIF1A |
| ESR1 | hsa-miR-199a-5p | NFKB1 |
| ESR1 | hsa-miR-449c-5p | HIF1A |
| ESR1 | hsa-let-7b-5p   | PTGS2 |
| ESR1 | hsa-let-7b-5p   | TLR4  |
| ESR1 | hsa-let-7b-5p   | HIF1A |
| ESR1 | hsa-miR-3609    | HIF1A |
| ESR1 | hsa-miR-20a-5p  | TP53  |
| ESR1 | hsa-miR-20a-5p  | HIF1A |
| ESR1 | hsa-miR-299-5p  | HIF1A |
| ESR1 | hsa-miR-7158-5p | STAT3 |
| ESR1 | hsa-miR-4725-3p | TP53  |
| ESR2 | hsa-miR-1178-3p | STAT3 |
| ESR2 | hsa-miR-6872-3p | STAT3 |
| ESR2 | hsa-miR-7113-5p | STAT3 |
| ESR2 | hsa-miR-6871-3p | STAT3 |
| ETS1 | hsa-miR-150-5p  | TP53  |
| ETS1 | hsa-miR-1908-5p | PTGS2 |
| ETS1 | hsa-miR-365a-5p | STAT3 |
| ETS1 | hsa-miR-199b-5p | HIF1A |
| ETS1 | hsa-miR-4470    | HIF1A |
| ETS1 | hsa-miR-4531    | TP53  |
| ETS1 | hsa-miR-21-5p   | TGFB1 |
| ETS1 | hsa-miR-21-5p   | HIF1A |
| ETS1 | hsa-miR-21-5p   | NFKB1 |
| ETS1 | hsa-miR-6815-3p | HIF1A |
| ETS1 | hsa-miR-449c-5p | HIF1A |
| ETS1 | hsa-miR-5193    | TP53  |
| ETS1 | hsa-miR-6807-3p | HIF1A |
| ETS1 | hsa-miR-6807-5p | STAT3 |

|      |                  |       |
|------|------------------|-------|
| ETS1 | hsa-miR-320a     | PTGS2 |
| ETS1 | hsa-miR-24-3p    | TGFB1 |
| ETS2 | hsa-miR-1322     | HIF1A |
| ETS2 | hsa-miR-7-5p     | TLR4  |
| ETS2 | hsa-miR-4659b-3p | TLR4  |
| ETS2 | hsa-miR-449c-5p  | HIF1A |
| ETS2 | hsa-miR-942-5p   | TLR4  |
| ETV1 | hsa-miR-3934-5p  | PTGS2 |
| ETV1 | hsa-miR-365a-5p  | STAT3 |
| ETV1 | hsa-miR-124-3p   | PTGS2 |
| ETV1 | hsa-miR-124-3p   | STAT3 |
| ETV1 | hsa-miR-149-3p   | TP53  |
| ETV4 | hsa-miR-7113-5p  | STAT3 |
| ETV5 | hsa-miR-15b-5p   | SMAD3 |
| ETV5 | hsa-miR-155-5p   | SMAD3 |
| ETV5 | hsa-miR-3128     | HIF1A |
| ETV5 | hsa-miR-16-5p    | PTGS2 |
| ETV5 | hsa-miR-16-5p    | TP53  |
| ETV5 | hsa-miR-16-5p    | SMAD3 |
| FEV  | hsa-miR-3074-3p  | HIF1A |
| FOS  | hsa-miR-3934-5p  | PTGS2 |
| FOS  | hsa-miR-210-3p   | NFKB1 |
| FOS  | hsa-miR-210-3p   | HIF1A |
| FOS  | hsa-miR-130b-3p  | STAT3 |
| FOS  | hsa-miR-942-5p   | TLR4  |
| FOS  | hsa-miR-214-3p   | TP53  |
| FOS  | hsa-miR-4470     | HIF1A |
| FOS  | hsa-miR-548g-3p  | TLR4  |
| FOS  | hsa-miR-199a-3p  | PTGS2 |
| FOS  | hsa-miR-144-3p   | TGFB1 |
| FOS  | hsa-let-7i-5p    | TLR4  |
| FOS  | hsa-miR-199b-5p  | HIF1A |
| FOS  | hsa-miR-4799-5p  | HIF1A |
| FOS  | hsa-miR-3668     | HIF1A |
| FOS  | hsa-miR-4282     | HIF1A |
| FOS  | hsa-miR-365a-5p  | STAT3 |

|     |                 |       |
|-----|-----------------|-------|
| FOS | hsa-miR-6133    | TP53  |
| FOS | hsa-miR-1181    | STAT3 |
| FOS | hsa-miR-7-5p    | TLR4  |
| FOS | hsa-miR-26a-5p  | IL6   |
| FOS | hsa-miR-3128    | HIF1A |
| FOS | hsa-miR-4738-3p | TLR4  |
| FOS | hsa-miR-4418    | HIF1A |
| FOS | hsa-miR-6871-3p | STAT3 |
| FOS | hsa-miR-5702    | TP53  |
| FOS | hsa-miR-663a    | TGFB1 |
| FOS | hsa-miR-365a-3p | IL6   |
| FOS | hsa-miR-589-5p  | PTGS2 |
| FOS | hsa-miR-34b-5p  | HIF1A |
| FOS | hsa-miR-4694-3p | TLR4  |
| FOS | hsa-miR-203a-3p | IL6   |
| FOS | hsa-miR-1908-5p | PTGS2 |
| FOS | hsa-miR-6809-3p | STAT3 |
| FOS | hsa-miR-16-5p   | PTGS2 |
| FOS | hsa-miR-16-5p   | TP53  |
| FOS | hsa-miR-16-5p   | NFKB1 |
| FOS | hsa-miR-6806-5p | HIF1A |
| FOS | hsa-miR-5197-5p | TP53  |
| FOS | hsa-miR-4531    | TP53  |
| FOS | hsa-miR-6815-3p | HIF1A |
| FOS | hsa-miR-30e-5p  | TP53  |
| FOS | hsa-let-7a-5p   | IL6   |
| FOS | hsa-let-7a-5p   | PTGS2 |
| FOS | hsa-let-7a-5p   | NFKB1 |
| FOS | hsa-miR-4279    | TLR4  |
| FOS | hsa-miR-4720-3p | STAT3 |
| FOS | hsa-miR-3165    | TP53  |
| FOS | hsa-miR-30b-5p  | TP53  |
| FOS | hsa-miR-24-3p   | TGFB1 |
| FOS | hsa-miR-21-5p   | TGFB1 |
| FOS | hsa-miR-21-5p   | TLR4  |
| FOS | hsa-miR-21-5p   | HIF1A |

|       |                  |       |
|-------|------------------|-------|
| FOS   | hsa-miR-21-5p    | NFKB1 |
| FOS   | hsa-miR-211-5p   | TGFB1 |
| FOS   | hsa-miR-199a-5p  | PTGS2 |
| FOS   | hsa-miR-199a-5p  | HIF1A |
| FOS   | hsa-miR-199a-5p  | NFKB1 |
| FOS   | hsa-miR-449c-5p  | HIF1A |
| FOS   | hsa-miR-4748     | HIF1A |
| FOS   | hsa-miR-128-3p   | PTGS2 |
| FOS   | hsa-miR-3609     | HIF1A |
| FOS   | hsa-miR-107      | IL6   |
| FOS   | hsa-miR-107      | HIF1A |
| FOSL1 | hsa-miR-30b-5p   | TP53  |
| FOSL2 | hsa-miR-132-3p   | PTGS2 |
| FOSL2 | hsa-miR-150-5p   | TP53  |
| FOSL2 | hsa-miR-1908-5p  | PTGS2 |
| FOSL2 | hsa-miR-4282     | HIF1A |
| FOSL2 | hsa-let-7a-5p    | IL6   |
| FOSL2 | hsa-let-7a-5p    | PTGS2 |
| FOSL2 | hsa-miR-6133     | TP53  |
| FOSL2 | hsa-miR-6809-3p  | STAT3 |
| FOSL2 | hsa-miR-1181     | STAT3 |
| FOSL2 | hsa-miR-22-3p    | HIF1A |
| FOSL2 | hsa-miR-5197-5p  | TP53  |
| FOSL2 | hsa-miR-5692a    | HIF1A |
| FOSL2 | hsa-miR-4470     | HIF1A |
| FOSL2 | hsa-miR-6511a-5p | HIF1A |
| FOSL2 | hsa-miR-33a-5p   | HIF1A |
| FOSL2 | hsa-miR-6789-3p  | STAT3 |
| FOSL2 | hsa-miR-4516     | STAT3 |
| FOSL2 | hsa-miR-4516     | TP53  |
| FOSL2 | hsa-miR-4531     | TP53  |
| FOSL2 | hsa-miR-21-5p    | TGFB1 |
| FOSL2 | hsa-miR-21-5p    | HIF1A |
| FOSL2 | hsa-miR-211-5p   | TGFB1 |
| FOSL2 | hsa-miR-199a-5p  | PTGS2 |
| FOSL2 | hsa-miR-199a-5p  | HIF1A |

|       |                  |       |
|-------|------------------|-------|
| FOSL2 | hsa-miR-3074-3p  | HIF1A |
| FOSL2 | hsa-miR-199a-3p  | PTGS2 |
| FOSL2 | hsa-miR-663a     | TGFB1 |
| FOSL2 | hsa-miR-365a-3p  | IL6   |
| FOSL2 | hsa-miR-589-5p   | PTGS2 |
| FOSL2 | hsa-miR-6875-3p  | STAT3 |
| FOSL2 | hsa-miR-92b-3p   | SMAD3 |
| FOSL2 | hsa-miR-449c-5p  | HIF1A |
| FOSL2 | hsa-miR-365a-5p  | STAT3 |
| FOSL2 | hsa-miR-4441     | STAT3 |
| FOSL2 | hsa-miR-155-5p   | IL6   |
| FOSL2 | hsa-miR-155-5p   | SMAD3 |
| FOSL2 | hsa-miR-128-3p   | PTGS2 |
| FOSL2 | hsa-miR-320a     | PTGS2 |
| FOXA1 | hsa-miR-548ah-5p | HIF1A |
| FOXA1 | hsa-miR-1178-3p  | STAT3 |
| FOXA1 | hsa-miR-3165     | TP53  |
| FOXA1 | hsa-miR-210-3p   | NFKB1 |
| FOXA1 | hsa-miR-210-3p   | HIF1A |
| FOXA1 | hsa-miR-150-5p   | TP53  |
| FOXA1 | hsa-miR-365a-3p  | IL6   |
| FOXA1 | hsa-miR-576-3p   | HIF1A |
| FOXA1 | hsa-miR-214-3p   | TP53  |
| FOXA1 | hsa-miR-149-3p   | TP53  |
| FOXA1 | hsa-miR-22-3p    | HIF1A |
| FOXA1 | hsa-miR-4470     | HIF1A |
| FOXA1 | hsa-miR-484      | IL2   |
| FOXA1 | hsa-miR-92a-3p   | NFKB1 |
| FOXA1 | hsa-miR-19a-3p   | TP53  |
| FOXA1 | hsa-miR-874-3p   | STAT3 |
| FOXA1 | hsa-miR-3160-3p  | HIF1A |
| FOXA1 | hsa-miR-18b-5p   | HIF1A |
| FOXA1 | hsa-miR-5681a    | STAT3 |
| FOXA1 | hsa-miR-144-3p   | TGFB1 |
| FOXA1 | hsa-miR-5681b    | HIF1A |
| FOXA1 | hsa-miR-4487     | HIF1A |

|       |                  |       |
|-------|------------------|-------|
| FOXA1 | hsa-miR-6755-5p  | HIF1A |
| FOXA1 | hsa-miR-92b-3p   | SMAD3 |
| FOXA1 | hsa-miR-181c-5p  | IL2   |
| FOXA1 | hsa-miR-199b-5p  | HIF1A |
| FOXA1 | hsa-miR-744-5p   | TGFB1 |
| FOXA1 | hsa-miR-92a-1-5p | TP53  |
| FOXA1 | hsa-miR-139-5p   | NFKB1 |
| FOXA1 | hsa-miR-491-5p   | TP53  |
| FOXA1 | hsa-miR-491-5p   | SMAD3 |
| FOXA1 | hsa-miR-4799-5p  | HIF1A |
| FOXA1 | hsa-miR-153-5p   | HIF1A |
| FOXA1 | hsa-miR-4282     | HIF1A |
| FOXA1 | hsa-miR-6133     | TP53  |
| FOXA1 | hsa-miR-1181     | STAT3 |
| FOXA1 | hsa-miR-15b-5p   | SMAD3 |
| FOXA1 | hsa-miR-5692a    | HIF1A |
| FOXA1 | hsa-miR-92a-2-5p | TP53  |
| FOXA1 | hsa-miR-15a-5p   | NFKB1 |
| FOXA1 | hsa-miR-15a-5p   | TP53  |
| FOXA1 | hsa-miR-15a-5p   | SMAD3 |
| FOXA1 | hsa-miR-4499     | HIF1A |
| FOXA1 | hsa-miR-324-3p   | TGFB1 |
| FOXA1 | hsa-miR-5702     | TP53  |
| FOXA1 | hsa-miR-4419a    | TP53  |
| FOXA1 | hsa-miR-4290     | SMAD3 |
| FOXA1 | hsa-miR-19b-3p   | TGFB1 |
| FOXA1 | hsa-miR-19b-3p   | TP53  |
| FOXA1 | hsa-miR-663a     | TGFB1 |
| FOXA1 | hsa-miR-6789-3p  | STAT3 |
| FOXA1 | hsa-miR-1322     | HIF1A |
| FOXA1 | hsa-miR-6872-3p  | STAT3 |
| FOXA1 | hsa-miR-34b-5p   | HIF1A |
| FOXA1 | hsa-miR-633      | TGFB1 |
| FOXA1 | hsa-miR-335-5p   | IL6   |
| FOXA1 | hsa-miR-335-5p   | SMAD3 |
| FOXA1 | hsa-miR-203a-3p  | IL6   |

|       |                 |       |
|-------|-----------------|-------|
| FOXA1 | hsa-miR-9-5p    | NFKB1 |
| FOXA1 | hsa-miR-6809-3p | STAT3 |
| FOXA1 | hsa-miR-16-5p   | NFKB1 |
| FOXA1 | hsa-miR-16-5p   | TP53  |
| FOXA1 | hsa-miR-16-5p   | SMAD3 |
| FOXA1 | hsa-miR-5197-5p | TP53  |
| FOXA1 | hsa-miR-122-5p  | TGFB1 |
| FOXA1 | hsa-miR-454-3p  | TP53  |
| FOXA1 | hsa-miR-1296-3p | TP53  |
| FOXA1 | hsa-miR-142-3p  | IL6   |
| FOXA1 | hsa-miR-29b-3p  | TGFB1 |
| FOXA1 | hsa-miR-608     | TP53  |
| FOXA1 | hsa-miR-6815-3p | HIF1A |
| FOXA1 | hsa-miR-1-3p    | IL6   |
| FOXA1 | hsa-miR-106a-3p | HIF1A |
| FOXA1 | hsa-miR-618     | STAT3 |
| FOXA1 | hsa-miR-4270    | STAT3 |
| FOXA1 | hsa-miR-3662    | HIF1A |
| FOXA1 | hsa-miR-365a-5p | STAT3 |
| FOXA1 | hsa-miR-4531    | TP53  |
| FOXA1 | hsa-miR-155-5p  | IL6   |
| FOXA1 | hsa-miR-155-5p  | NFKB1 |
| FOXA1 | hsa-miR-155-5p  | IL2   |
| FOXA1 | hsa-miR-155-5p  | SMAD3 |
| FOXA1 | hsa-miR-4720-3p | STAT3 |
| FOXA1 | hsa-miR-149-5p  | IL6   |
| FOXA1 | hsa-miR-193b-3p | SMAD3 |
| FOXA1 | hsa-miR-217     | HIF1A |
| FOXA1 | hsa-miR-4516    | STAT3 |
| FOXA1 | hsa-miR-4516    | TP53  |
| FOXA1 | hsa-miR-21-5p   | TGFB1 |
| FOXA1 | hsa-miR-21-5p   | HIF1A |
| FOXA1 | hsa-miR-21-5p   | NFKB1 |
| FOXA1 | hsa-miR-211-5p  | TGFB1 |
| FOXA1 | hsa-miR-449c-5p | HIF1A |
| FOXA1 | hsa-miR-24-3p   | TGFB1 |



|       |                 |       |
|-------|-----------------|-------|
| FOXA1 | hsa-miR-181a-5p | STAT3 |
| FOXA1 | hsa-let-7b-5p   | HIF1A |
| FOXA1 | hsa-miR-20b-5p  | HIF1A |
| FOXA1 | hsa-miR-3609    | HIF1A |
| FOXA1 | hsa-miR-20a-5p  | TP53  |
| FOXA1 | hsa-miR-20a-5p  | HIF1A |
| FOXA1 | hsa-miR-7158-5p | STAT3 |
| FOXA1 | hsa-miR-106a-5p | TP53  |
| FOXA2 | hsa-miR-132-3p  | PTGS2 |
| FOXA2 | hsa-miR-1908-5p | PTGS2 |
| FOXA2 | hsa-let-7a-5p   | IL6   |
| FOXA2 | hsa-let-7a-5p   | PTGS2 |
| FOXA2 | hsa-miR-6809-3p | STAT3 |
| FOXA2 | hsa-miR-24-3p   | TGFB1 |
| FOXA2 | hsa-miR-454-3p  | TP53  |
| FOXA2 | hsa-miR-30b-5p  | TP53  |
| FOXA2 | hsa-miR-122-5p  | TGFB1 |
| FOXA2 | hsa-miR-608     | TP53  |
| FOXA2 | hsa-miR-21-5p   | TGFB1 |
| FOXA2 | hsa-miR-145-5p  | SMAD3 |
| FOXA2 | hsa-miR-663a    | TGFB1 |
| FOXA2 | hsa-miR-4684-5p | STAT3 |
| FOXA2 | hsa-miR-6789-3p | STAT3 |
| FOXA2 | hsa-miR-92b-3p  | SMAD3 |
| FOXA2 | hsa-miR-101-3p  | PTGS2 |
| FOXA2 | hsa-miR-320a    | PTGS2 |
| FOXA2 | hsa-miR-107     | IL6   |
| FOXD2 | hsa-miR-210-3p  | NFKB1 |
| FOXD2 | hsa-miR-210-3p  | HIF1A |
| FOXD2 | hsa-miR-5094    | HIF1A |
| FOXG1 | hsa-miR-18a-5p  | TP53  |
| FOXG1 | hsa-miR-18a-5p  | HIF1A |
| FOXG1 | hsa-miR-18a-5p  | SMAD3 |
| FOXG1 | hsa-miR-92b-3p  | SMAD3 |
| FOXG1 | hsa-miR-150-5p  | TP53  |
| FOXG1 | hsa-miR-20a-5p  | TP53  |

|       |                 |       |
|-------|-----------------|-------|
| FOXG1 | hsa-miR-20a-5p  | HIF1A |
| FOXG1 | hsa-miR-19b-3p  | TP53  |
| FOXG1 | hsa-miR-17-5p   | TP53  |
| FOXG1 | hsa-miR-17-5p   | HIF1A |
| FOXG1 | hsa-miR-17-5p   | SMAD3 |
| FOXG1 | hsa-miR-18a-3p  | SMAD3 |
| FOXG1 | hsa-miR-19a-3p  | TP53  |
| FOXG1 | hsa-miR-5702    | TP53  |
| FOXH1 | hsa-miR-145-5p  | SMAD3 |
| FOXH1 | hsa-miR-3529-3p | SMAD3 |
| FOXM1 | hsa-miR-132-3p  | PTGS2 |
| FOXM1 | hsa-miR-9-5p    | NFKB1 |
| FOXM1 | hsa-let-7a-5p   | IL6   |
| FOXM1 | hsa-let-7a-5p   | PTGS2 |
| FOXM1 | hsa-let-7a-5p   | NFKB1 |
| FOXM1 | hsa-miR-3165    | TP53  |
| FOXM1 | hsa-miR-625-3p  | HIF1A |
| FOXM1 | hsa-miR-4799-5p | HIF1A |
| FOXM1 | hsa-miR-1908-5p | PTGS2 |
| FOXM1 | hsa-miR-130b-3p | STAT3 |
| FOXM1 | hsa-miR-106b-3p | HIF1A |
| FOXM1 | hsa-miR-30d-5p  | TP53  |
| FOXM1 | hsa-miR-454-3p  | TP53  |
| FOXM1 | hsa-miR-130a-3p | TGFB1 |
| FOXM1 | hsa-miR-130a-3p | TNF   |
| FOXM1 | hsa-miR-214-3p  | TP53  |
| FOXM1 | hsa-miR-99a-5p  | PTGS2 |
| FOXM1 | hsa-miR-150-5p  | TP53  |
| FOXM1 | hsa-miR-22-3p   | HIF1A |
| FOXM1 | hsa-miR-365a-3p | IL6   |
| FOXM1 | hsa-miR-4470    | HIF1A |
| FOXM1 | hsa-miR-6789-3p | STAT3 |
| FOXM1 | hsa-miR-106b-5p | STAT3 |
| FOXM1 | hsa-miR-106b-5p | HIF1A |
| FOXM1 | hsa-miR-210-3p  | NFKB1 |
| FOXM1 | hsa-miR-210-3p  | HIF1A |

|       |                 |       |
|-------|-----------------|-------|
| FOXM1 | hsa-miR-93-5p   | TGFB1 |
| FOXM1 | hsa-miR-93-5p   | STAT3 |
| FOXM1 | hsa-miR-93-5p   | HIF1A |
| FOXM1 | hsa-miR-155-5p  | IL6   |
| FOXM1 | hsa-miR-155-5p  | NFKB1 |
| FOXM1 | hsa-miR-4531    | TP53  |
| FOXM1 | hsa-miR-296-3p  | PTGS2 |
| FOXM1 | hsa-miR-21-5p   | TGFB1 |
| FOXM1 | hsa-miR-21-5p   | HIF1A |
| FOXM1 | hsa-miR-21-5p   | NFKB1 |
| FOXM1 | hsa-miR-211-5p  | TGFB1 |
| FOXM1 | hsa-miR-320a    | PTGS2 |
| FOXM1 | hsa-miR-142-3p  | IL6   |
| FOXM1 | hsa-miR-449c-5p | HIF1A |
| FOXM1 | hsa-miR-5193    | TP53  |
| FOXM1 | hsa-miR-324-3p  | TGFB1 |
| FOXM1 | hsa-miR-663a    | TGFB1 |
| FOXM1 | hsa-miR-6872-3p | STAT3 |
| FOXM1 | hsa-miR-589-5p  | PTGS2 |
| FOXM1 | hsa-miR-6875-3p | STAT3 |
| FOXM1 | hsa-miR-4487    | HIF1A |
| FOXM1 | hsa-miR-3662    | HIF1A |
| FOXM1 | hsa-miR-124-3p  | IL6   |
| FOXM1 | hsa-miR-124-3p  | PTGS2 |
| FOXM1 | hsa-miR-124-3p  | STAT3 |
| FOXM1 | hsa-miR-365a-5p | STAT3 |
| FOXM1 | hsa-miR-1181    | STAT3 |
| FOXM1 | hsa-miR-128-3p  | PTGS2 |
| FOXM1 | hsa-miR-424-5p  | HIF1A |
| FOXM1 | hsa-miR-24-3p   | TGFB1 |
| FOXO3 | hsa-miR-1178-3p | STAT3 |
| FOXP1 | hsa-miR-18a-5p  | TP53  |
| FOXP1 | hsa-miR-18a-5p  | HIF1A |
| FOXP1 | hsa-miR-18a-5p  | SMAD3 |
| FOXP1 | hsa-miR-149-3p  | TP53  |
| FOXP1 | hsa-miR-30b-5p  | TP53  |

|       |                 |       |
|-------|-----------------|-------|
| FOXP1 | hsa-miR-5702    | TP53  |
| FOXP1 | hsa-miR-17-5p   | TGFB1 |
| FOXP1 | hsa-miR-17-5p   | TP53  |
| FOXP1 | hsa-miR-17-5p   | HIF1A |
| FOXP1 | hsa-miR-17-5p   | SMAD3 |
| FOXP1 | hsa-miR-29b-3p  | TGFB1 |
| FOXP1 | hsa-miR-7158-5p | STAT3 |
| FOXP1 | hsa-miR-20a-5p  | TP53  |
| FOXP1 | hsa-miR-20a-5p  | HIF1A |
| FOXP1 | hsa-miR-18a-3p  | SMAD3 |
| FOXP2 | hsa-miR-139-5p  | NFKB1 |
| FOXP2 | hsa-miR-210-3p  | NFKB1 |
| FOXP2 | hsa-miR-210-3p  | HIF1A |
| FOXP2 | hsa-miR-4799-5p | HIF1A |
| FOXP2 | hsa-miR-1908-5p | PTGS2 |
| FOXP2 | hsa-miR-5193    | TP53  |
| FOXP2 | hsa-miR-100-5p  | PTGS2 |
| FOXP2 | hsa-miR-6809-3p | STAT3 |
| FOXP2 | hsa-miR-214-3p  | TP53  |
| FOXP2 | hsa-miR-199b-5p | HIF1A |
| FOXP2 | hsa-miR-24-3p   | TGFB1 |
| FOXP2 | hsa-miR-150-5p  | TP53  |
| FOXP2 | hsa-miR-199a-5p | PTGS2 |
| FOXP2 | hsa-miR-199a-5p | HIF1A |
| FOXP2 | hsa-miR-199a-5p | NFKB1 |
| FOXP2 | hsa-miR-4748    | HIF1A |
| FOXP2 | hsa-miR-199a-3p | PTGS2 |
| FOXP2 | hsa-miR-6872-3p | STAT3 |
| FOXP2 | hsa-miR-124-3p  | PTGS2 |
| FOXP2 | hsa-miR-124-3p  | STAT3 |
| FOXP2 | hsa-miR-151a-3p | HIF1A |
| GABPA | hsa-miR-132-3p  | PTGS2 |
| GABPA | hsa-miR-9-5p    | NFKB1 |
| GABPA | hsa-miR-210-3p  | NFKB1 |
| GABPA | hsa-miR-210-3p  | HIF1A |
| GABPA | hsa-miR-371b-3p | STAT3 |

|       |                 |       |
|-------|-----------------|-------|
| GABPA | hsa-miR-365a-5p | STAT3 |
| GABPA | hsa-miR-149-3p  | TP53  |
| GABPA | hsa-miR-199b-5p | HIF1A |
| GABPA | hsa-miR-22-3p   | HIF1A |
| GABPA | hsa-miR-4441    | STAT3 |
| GABPA | hsa-miR-4470    | HIF1A |
| GABPA | hsa-miR-2682-5p | HIF1A |
| GABPA | hsa-miR-6789-3p | STAT3 |
| GABPA | hsa-miR-4516    | STAT3 |
| GABPA | hsa-miR-4516    | TP53  |
| GABPA | hsa-miR-150-5p  | TP53  |
| GABPA | hsa-miR-6815-3p | HIF1A |
| GABPA | hsa-miR-137     | PTGS2 |
| GABPA | hsa-miR-145-5p  | SMAD3 |
| GABPA | hsa-miR-24-3p   | TGFB1 |
| GABPA | hsa-miR-5193    | TP53  |
| GABPA | hsa-miR-663a    | TGFB1 |
| GABPA | hsa-miR-6872-3p | STAT3 |
| GABPA | hsa-miR-92b-3p  | SMAD3 |
| GABPA | hsa-miR-200a-3p | TP53  |
| GABPA | hsa-miR-200a-3p | SMAD3 |
| GABPA | hsa-miR-124-3p  | PTGS2 |
| GABPA | hsa-miR-124-3p  | STAT3 |
| GABPA | hsa-miR-138-5p  | HIF1A |
| GABPA | hsa-miR-1181    | STAT3 |
| GABPA | hsa-miR-320a    | PTGS2 |
| GABPA | hsa-miR-3121-3p | HIF1A |
| GATA1 | hsa-miR-132-3p  | PTGS2 |
| GATA1 | hsa-miR-889-3p  | HIF1A |
| GATA1 | hsa-miR-9-5p    | NFKB1 |
| GATA1 | hsa-miR-625-3p  | HIF1A |
| GATA1 | hsa-miR-4720-3p | STAT3 |
| GATA1 | hsa-miR-6809-3p | STAT3 |
| GATA1 | hsa-miR-155-5p  | NFKB1 |
| GATA1 | hsa-miR-143-3p  | PTGS2 |
| GATA1 | hsa-miR-143-3p  | TNF   |

|       |                  |       |
|-------|------------------|-------|
| GATA1 | hsa-miR-18a-5p   | TP53  |
| GATA1 | hsa-miR-18a-5p   | HIF1A |
| GATA1 | hsa-miR-33a-5p   | HIF1A |
| GATA1 | hsa-miR-6760-5p  | TP53  |
| GATA1 | hsa-miR-935      | HIF1A |
| GATA1 | hsa-miR-19a-3p   | TNF   |
| GATA1 | hsa-miR-19a-3p   | TP53  |
| GATA1 | hsa-miR-30b-5p   | TP53  |
| GATA1 | hsa-miR-92a-3p   | NFKB1 |
| GATA1 | hsa-miR-4659a-3p | TLR4  |
| GATA1 | hsa-miR-187-3p   | TNF   |
| GATA1 | hsa-miR-329-5p   | HIF1A |
| GATA1 | hsa-miR-223-3p   | TP53  |
| GATA1 | hsa-miR-21-5p    | NFKB1 |
| GATA1 | hsa-miR-21-5p    | TLR4  |
| GATA1 | hsa-miR-21-5p    | HIF1A |
| GATA1 | hsa-miR-6815-3p  | HIF1A |
| GATA1 | hsa-miR-153-5p   | HIF1A |
| GATA1 | hsa-miR-92a-1-5p | TP53  |
| GATA1 | hsa-miR-138-5p   | HIF1A |
| GATA1 | hsa-miR-19b-3p   | TP53  |
| GATA1 | hsa-miR-17-5p    | PTGS2 |
| GATA1 | hsa-miR-17-5p    | TP53  |
| GATA1 | hsa-miR-17-5p    | HIF1A |
| GATA1 | hsa-miR-146a-5p  | PTGS2 |
| GATA1 | hsa-miR-146a-5p  | TLR4  |
| GATA1 | hsa-miR-146a-5p  | NFKB1 |
| GATA1 | hsa-miR-589-5p   | PTGS2 |
| GATA1 | hsa-miR-940      | HIF1A |
| GATA1 | hsa-miR-1910-3p  | HIF1A |
| GATA1 | hsa-miR-4271     | TP53  |
| GATA1 | hsa-miR-4659b-3p | TLR4  |
| GATA1 | hsa-miR-1234-3p  | STAT3 |
| GATA1 | hsa-miR-3662     | HIF1A |
| GATA1 | hsa-miR-20a-5p   | TP53  |
| GATA1 | hsa-miR-20a-5p   | HIF1A |

|       |                 |       |
|-------|-----------------|-------|
| GATA1 | hsa-miR-34b-5p  | HIF1A |
| GATA1 | hsa-miR-199b-5p | HIF1A |
| GATA1 | hsa-miR-4441    | STAT3 |
| GATA1 | hsa-miR-1908-5p | PTGS2 |
| GATA1 | hsa-miR-124-3p  | PTGS2 |
| GATA1 | hsa-miR-124-3p  | STAT3 |
| GATA2 | hsa-miR-132-3p  | PTGS2 |
| GATA2 | hsa-miR-558     | PTGS2 |
| GATA2 | hsa-miR-3934-5p | PTGS2 |
| GATA2 | hsa-miR-9-5p    | NFKB1 |
| GATA2 | hsa-miR-150-5p  | TP53  |
| GATA2 | hsa-miR-1908-5p | PTGS2 |
| GATA2 | hsa-miR-4698    | TLR4  |
| GATA2 | hsa-miR-143-3p  | PTGS2 |
| GATA2 | hsa-miR-143-3p  | TNF   |
| GATA2 | hsa-miR-143-3p  | SMAD3 |
| GATA2 | hsa-miR-18a-5p  | TP53  |
| GATA2 | hsa-miR-18a-5p  | SMAD3 |
| GATA2 | hsa-miR-630     | TLR4  |
| GATA2 | hsa-miR-4441    | STAT3 |
| GATA2 | hsa-miR-3165    | TP53  |
| GATA2 | hsa-miR-19a-3p  | TNF   |
| GATA2 | hsa-miR-19a-3p  | TP53  |
| GATA2 | hsa-miR-942-5p  | TLR4  |
| GATA2 | hsa-miR-4738-3p | TLR4  |
| GATA2 | hsa-miR-142-3p  | IL6   |
| GATA2 | hsa-miR-4650-5p | TP53  |
| GATA2 | hsa-miR-223-3p  | IL6   |
| GATA2 | hsa-miR-223-3p  | TP53  |
| GATA2 | hsa-miR-145-5p  | SMAD3 |
| GATA2 | hsa-miR-17-5p   | PTGS2 |
| GATA2 | hsa-miR-17-5p   | TP53  |
| GATA2 | hsa-miR-17-5p   | SMAD3 |
| GATA2 | hsa-let-7a-5p   | IL6   |
| GATA2 | hsa-let-7a-5p   | PTGS2 |
| GATA2 | hsa-let-7a-5p   | NFKB1 |

|       |                 |       |
|-------|-----------------|-------|
| GATA2 | hsa-miR-146a-5p | PTGS2 |
| GATA2 | hsa-miR-146a-5p | TLR4  |
| GATA2 | hsa-miR-146a-5p | NFKB1 |
| GATA2 | hsa-let-7i-5p   | TLR4  |
| GATA2 | hsa-miR-3658    | TLR4  |
| GATA2 | hsa-miR-92b-3p  | SMAD3 |
| GATA2 | hsa-miR-1234-3p | STAT3 |
| GATA2 | hsa-miR-922     | STAT3 |
| GATA2 | hsa-miR-124-3p  | IL6   |
| GATA2 | hsa-miR-124-3p  | PTGS2 |
| GATA2 | hsa-miR-124-3p  | STAT3 |
| GATA2 | hsa-miR-20a-5p  | TP53  |
| GATA2 | hsa-miR-155-5p  | IL6   |
| GATA2 | hsa-miR-155-5p  | NFKB1 |
| GATA2 | hsa-miR-155-5p  | SMAD3 |
| GATA2 | hsa-miR-101-3p  | PTGS2 |
| GATA2 | hsa-miR-130b-3p | STAT3 |
| GATA2 | hsa-miR-335-5p  | IL6   |
| GATA2 | hsa-miR-335-5p  | PTGS2 |
| GATA2 | hsa-miR-335-5p  | TLR4  |
| GATA2 | hsa-miR-335-5p  | SMAD3 |
| GATA2 | hsa-miR-18a-3p  | SMAD3 |
| GATA2 | hsa-miR-4694-3p | TLR4  |
| GATA3 | hsa-miR-558     | PTGS2 |
| GATA3 | hsa-miR-558     | HIF1A |
| GATA3 | hsa-miR-210-3p  | NFKB1 |
| GATA3 | hsa-miR-210-3p  | HIF1A |
| GATA3 | hsa-miR-150-5p  | TP53  |
| GATA3 | hsa-miR-1972    | TP53  |
| GATA3 | hsa-miR-942-5p  | TLR4  |
| GATA3 | hsa-miR-214-3p  | TP53  |
| GATA3 | hsa-miR-149-3p  | TP53  |
| GATA3 | hsa-miR-4470    | HIF1A |
| GATA3 | hsa-miR-548g-3p | TLR4  |
| GATA3 | hsa-miR-199a-3p | PTGS2 |
| GATA3 | hsa-miR-1264    | TP53  |



|       |                  |       |
|-------|------------------|-------|
| GATA3 | hsa-let-7i-5p    | TLR4  |
| GATA3 | hsa-miR-4487     | HIF1A |
| GATA3 | hsa-miR-365b-5p  | STAT3 |
| GATA3 | hsa-miR-92a-1-5p | TP53  |
| GATA3 | hsa-miR-4650-5p  | TP53  |
| GATA3 | hsa-miR-6133     | TP53  |
| GATA3 | hsa-miR-24-3p    | TGFB1 |
| GATA3 | hsa-miR-3658     | TLR4  |
| GATA3 | hsa-miR-4738-3p  | TLR4  |
| GATA3 | hsa-miR-324-3p   | TGFB1 |
| GATA3 | hsa-miR-663a     | TGFB1 |
| GATA3 | hsa-miR-605-5p   | TP53  |
| GATA3 | hsa-miR-6789-3p  | STAT3 |
| GATA3 | hsa-miR-1322     | HIF1A |
| GATA3 | hsa-miR-5197-5p  | TP53  |
| GATA3 | hsa-miR-630      | TLR4  |
| GATA3 | hsa-miR-633      | TGFB1 |
| GATA3 | hsa-miR-320a     | PTGS2 |
| GATA3 | hsa-miR-18a-5p   | TP53  |
| GATA3 | hsa-miR-18a-5p   | HIF1A |
| GATA3 | hsa-miR-203a-3p  | TNF   |
| GATA3 | hsa-miR-9-5p     | NFKB1 |
| GATA3 | hsa-miR-1908-5p  | PTGS2 |
| GATA3 | hsa-miR-19a-3p   | TNF   |
| GATA3 | hsa-miR-19a-3p   | TP53  |
| GATA3 | hsa-miR-4742-3p  | TLR4  |
| GATA3 | hsa-miR-17-5p    | PTGS2 |
| GATA3 | hsa-miR-17-5p    | TP53  |
| GATA3 | hsa-miR-17-5p    | HIF1A |
| GATA3 | hsa-miR-17-5p    | TGFB1 |
| GATA3 | hsa-let-7a-5p    | PTGS2 |
| GATA3 | hsa-let-7a-5p    | NFKB1 |
| GATA3 | hsa-miR-4271     | TP53  |
| GATA3 | hsa-miR-4279     | TLR4  |
| GATA3 | hsa-miR-3668     | HIF1A |
| GATA3 | hsa-miR-155-5p   | NFKB1 |

|       |                 |       |
|-------|-----------------|-------|
| GATA3 | hsa-miR-365a-5p | STAT3 |
| GATA3 | hsa-miR-4720-3p | STAT3 |
| GATA3 | hsa-miR-4698    | TLR4  |
| GATA3 | hsa-miR-30b-5p  | TP53  |
| GATA3 | hsa-miR-21-5p   | TGFB1 |
| GATA3 | hsa-miR-21-5p   | TLR4  |
| GATA3 | hsa-miR-21-5p   | HIF1A |
| GATA3 | hsa-miR-21-5p   | NFKB1 |
| GATA3 | hsa-miR-211-5p  | TGFB1 |
| GATA3 | hsa-miR-199a-5p | PTGS2 |
| GATA3 | hsa-miR-199a-5p | HIF1A |
| GATA3 | hsa-miR-199a-5p | NFKB1 |
| GATA3 | hsa-miR-19b-3p  | TGFB1 |
| GATA3 | hsa-miR-19b-3p  | TP53  |
| GATA3 | hsa-miR-7-5p    | TLR4  |
| GATA3 | hsa-miR-181a-5p | PTGS2 |
| GATA3 | hsa-miR-181a-5p | STAT3 |
| GATA3 | hsa-miR-128-3p  | PTGS2 |
| GATA3 | hsa-miR-3609    | HIF1A |
| GATA3 | hsa-miR-20a-5p  | TP53  |
| GATA3 | hsa-miR-20a-5p  | HIF1A |
| GATA3 | hsa-let-7c-5p   | PTGS2 |
| GATA3 | hsa-miR-4725-3p | TP53  |
| GATA4 | hsa-miR-3934-5p | PTGS2 |
| GATA4 | hsa-miR-203a-3p | IL6   |
| GATA4 | hsa-miR-203a-3p | TNF   |
| GATA4 | hsa-miR-210-3p  | NFKB1 |
| GATA4 | hsa-miR-210-3p  | HIF1A |
| GATA4 | hsa-miR-18a-5p  | TP53  |
| GATA4 | hsa-miR-18a-5p  | HIF1A |
| GATA4 | hsa-miR-18a-5p  | SMAD3 |
| GATA4 | hsa-miR-22-3p   | HIF1A |
| GATA4 | hsa-miR-4470    | HIF1A |
| GATA4 | hsa-miR-548g-3p | TLR4  |
| GATA4 | hsa-miR-4768-5p | STAT3 |
| GATA4 | hsa-miR-92a-3p  | NFKB1 |

|       |                  |       |
|-------|------------------|-------|
| GATA4 | hsa-miR-1908-5p  | PTGS2 |
| GATA4 | hsa-miR-199a-3p  | PTGS2 |
| GATA4 | hsa-miR-144-3p   | TGFB1 |
| GATA4 | hsa-let-7i-5p    | TLR4  |
| GATA4 | hsa-miR-4487     | HIF1A |
| GATA4 | hsa-miR-92b-3p   | SMAD3 |
| GATA4 | hsa-miR-4659b-3p | TLR4  |
| GATA4 | hsa-miR-124-3p   | IL6   |
| GATA4 | hsa-miR-124-3p   | PTGS2 |
| GATA4 | hsa-miR-124-3p   | STAT3 |
| GATA4 | hsa-miR-92a-1-5p | TP53  |
| GATA4 | hsa-miR-18a-3p   | SMAD3 |
| GATA4 | hsa-miR-4650-5p  | TP53  |
| GATA4 | hsa-miR-365a-5p  | STAT3 |
| GATA4 | hsa-miR-7-5p     | TLR4  |
| GATA4 | hsa-miR-3658     | TLR4  |
| GATA4 | hsa-miR-6511a-5p | HIF1A |
| GATA4 | hsa-miR-3128     | HIF1A |
| GATA4 | hsa-miR-4738-3p  | TLR4  |
| GATA4 | hsa-miR-324-3p   | TGFB1 |
| GATA4 | hsa-miR-663a     | TGFB1 |
| GATA4 | hsa-miR-6760-5p  | TP53  |
| GATA4 | hsa-miR-589-5p   | PTGS2 |
| GATA4 | hsa-miR-6789-3p  | STAT3 |
| GATA4 | hsa-miR-1322     | HIF1A |
| GATA4 | hsa-miR-6872-3p  | STAT3 |
| GATA4 | hsa-miR-6875-3p  | STAT3 |
| GATA4 | hsa-miR-200a-3p  | TP53  |
| GATA4 | hsa-miR-200a-3p  | SMAD3 |
| GATA4 | hsa-miR-138-5p   | HIF1A |
| GATA4 | hsa-miR-5197-5p  | TP53  |
| GATA4 | hsa-miR-34b-5p   | HIF1A |
| GATA4 | hsa-miR-320a     | PTGS2 |
| GATA4 | hsa-miR-548ah-5p | HIF1A |
| GATA4 | hsa-miR-371b-3p  | STAT3 |
| GATA4 | hsa-miR-5193     | TP53  |

|       |                  |       |
|-------|------------------|-------|
| GATA4 | hsa-miR-935      | HIF1A |
| GATA4 | hsa-miR-6809-3p  | STAT3 |
| GATA4 | hsa-miR-365a-3p  | IL6   |
| GATA4 | hsa-miR-19a-3p   | TNF   |
| GATA4 | hsa-miR-19a-3p   | TP53  |
| GATA4 | hsa-miR-132-3p   | PTGS2 |
| GATA4 | hsa-miR-6815-3p  | HIF1A |
| GATA4 | hsa-miR-17-5p    | TGFB1 |
| GATA4 | hsa-miR-17-5p    | PTGS2 |
| GATA4 | hsa-miR-17-5p    | HIF1A |
| GATA4 | hsa-miR-17-5p    | SMAD3 |
| GATA4 | hsa-miR-17-5p    | TP53  |
| GATA4 | hsa-miR-1181     | STAT3 |
| GATA4 | hsa-miR-155-5p   | IL6   |
| GATA4 | hsa-miR-155-5p   | NFKB1 |
| GATA4 | hsa-miR-155-5p   | SMAD3 |
| GATA4 | hsa-miR-9-5p     | NFKB1 |
| GATA4 | hsa-miR-138-2-3p | STAT3 |
| GATA4 | hsa-miR-195-5p   | SMAD3 |
| GATA4 | hsa-miR-3165     | TP53  |
| GATA4 | hsa-miR-30b-5p   | TP53  |
| GATA4 | hsa-miR-21-5p    | TGFB1 |
| GATA4 | hsa-miR-21-5p    | TLR4  |
| GATA4 | hsa-miR-21-5p    | HIF1A |
| GATA4 | hsa-miR-21-5p    | NFKB1 |
| GATA4 | hsa-miR-211-5p   | TGFB1 |
| GATA4 | hsa-miR-199a-5p  | PTGS2 |
| GATA4 | hsa-miR-199a-5p  | HIF1A |
| GATA4 | hsa-miR-199a-5p  | NFKB1 |
| GATA4 | hsa-miR-19b-3p   | TGFB1 |
| GATA4 | hsa-miR-19b-3p   | TP53  |
| GATA4 | hsa-miR-449c-5p  | HIF1A |
| GATA4 | hsa-let-7b-5p    | PTGS2 |
| GATA4 | hsa-let-7b-5p    | TLR4  |
| GATA4 | hsa-let-7b-5p    | HIF1A |
| GATA4 | hsa-miR-128-3p   | PTGS2 |

|       |                  |       |
|-------|------------------|-------|
| GATA4 | hsa-miR-20a-5p   | TP53  |
| GATA4 | hsa-miR-20a-5p   | HIF1A |
| GATA6 | hsa-miR-558      | PTGS2 |
| GATA6 | hsa-miR-558      | HIF1A |
| GATA6 | hsa-miR-3934-5p  | PTGS2 |
| GATA6 | hsa-miR-210-3p   | NFKB1 |
| GATA6 | hsa-miR-210-3p   | HIF1A |
| GATA6 | hsa-miR-5094     | HIF1A |
| GATA6 | hsa-miR-4684-5p  | STAT3 |
| GATA6 | hsa-miR-942-5p   | TLR4  |
| GATA6 | hsa-miR-22-3p    | HIF1A |
| GATA6 | hsa-miR-4470     | HIF1A |
| GATA6 | hsa-miR-548g-3p  | TLR4  |
| GATA6 | hsa-miR-1908-5p  | PTGS2 |
| GATA6 | hsa-miR-3160-3p  | HIF1A |
| GATA6 | hsa-miR-4270     | STAT3 |
| GATA6 | hsa-miR-30d-5p   | TP53  |
| GATA6 | hsa-let-7i-5p    | TLR4  |
| GATA6 | hsa-miR-4487     | HIF1A |
| GATA6 | hsa-miR-6755-5p  | HIF1A |
| GATA6 | hsa-miR-4659b-3p | TLR4  |
| GATA6 | hsa-miR-1234-3p  | STAT3 |
| GATA6 | hsa-miR-4650-5p  | TP53  |
| GATA6 | hsa-miR-5692a    | HIF1A |
| GATA6 | hsa-miR-26a-5p   | IL6   |
| GATA6 | hsa-miR-4499     | HIF1A |
| GATA6 | hsa-miR-6511a-5p | HIF1A |
| GATA6 | hsa-miR-4738-3p  | TLR4  |
| GATA6 | hsa-miR-6871-3p  | STAT3 |
| GATA6 | hsa-miR-137      | PTGS2 |
| GATA6 | hsa-miR-652-3p   | PTGS2 |
| GATA6 | hsa-miR-663a     | TGFB1 |
| GATA6 | hsa-miR-589-5p   | PTGS2 |
| GATA6 | hsa-miR-605-5p   | TP53  |
| GATA6 | hsa-miR-29b-3p   | TGFB1 |
| GATA6 | hsa-miR-1322     | HIF1A |

|       |                  |       |
|-------|------------------|-------|
| GATA6 | hsa-miR-138-5p   | HIF1A |
| GATA6 | hsa-miR-633      | TGFB1 |
| GATA6 | hsa-miR-320a     | PTGS2 |
| GATA6 | hsa-miR-625-3p   | HIF1A |
| GATA6 | hsa-miR-151a-3p  | HIF1A |
| GATA6 | hsa-miR-146a-5p  | PTGS2 |
| GATA6 | hsa-miR-146a-5p  | TLR4  |
| GATA6 | hsa-miR-146a-5p  | NFKB1 |
| GATA6 | hsa-miR-935      | HIF1A |
| GATA6 | hsa-miR-1296-3p  | TP53  |
| GATA6 | hsa-miR-608      | TP53  |
| GATA6 | hsa-let-7a-5p    | IL6   |
| GATA6 | hsa-let-7a-5p    | PTGS2 |
| GATA6 | hsa-let-7a-5p    | NFKB1 |
| GATA6 | hsa-miR-618      | STAT3 |
| GATA6 | hsa-miR-4279     | TLR4  |
| GATA6 | hsa-miR-9-5p     | NFKB1 |
| GATA6 | hsa-miR-149-5p   | IL6   |
| GATA6 | hsa-miR-138-2-3p | STAT3 |
| GATA6 | hsa-miR-6837-5p  | STAT3 |
| GATA6 | hsa-miR-100-5p   | PTGS2 |
| GATA6 | hsa-miR-3165     | TP53  |
| GATA6 | hsa-miR-145-5p   | SMAD3 |
| GATA6 | hsa-miR-449c-5p  | HIF1A |
| GATA6 | hsa-miR-4463     | HIF1A |
| GATA6 | hsa-miR-107      | IL6   |
| GATA6 | hsa-miR-107      | HIF1A |
| GMEB1 | hsa-miR-935      | HIF1A |
| GMEB1 | hsa-let-7b-5p    | HIF1A |
| GMEB2 | hsa-miR-132-3p   | PTGS2 |
| GMEB2 | hsa-miR-128-3p   | PTGS2 |
| GMEB2 | hsa-miR-106b-5p  | STAT3 |
| GMEB2 | hsa-miR-106b-5p  | HIF1A |
| GMEB2 | hsa-miR-106b-3p  | HIF1A |
| GMEB2 | hsa-miR-93-5p    | TGFB1 |
| GMEB2 | hsa-miR-93-5p    | STAT3 |

|       |                  |       |
|-------|------------------|-------|
| GMEB2 | hsa-miR-93-5p    | HIF1A |
| HAND1 | hsa-miR-9-5p     | NFKB1 |
| HAND1 | hsa-miR-6511a-5p | HIF1A |
| HAND1 | hsa-miR-2682-5p  | HIF1A |
| HAND1 | hsa-miR-107      | HIF1A |
| HBP1  | hsa-miR-6875-3p  | STAT3 |
| HBP1  | hsa-miR-449c-5p  | HIF1A |
| HBP1  | hsa-miR-144-3p   | TGFB1 |
| HES4  | hsa-miR-203a-3p  | IL6   |
| HES4  | hsa-miR-935      | HIF1A |
| HEY1  | hsa-miR-18a-5p   | TP53  |
| HEY1  | hsa-miR-18a-5p   | HIF1A |
| HEY1  | hsa-miR-18a-5p   | SMAD3 |
| HEY1  | hsa-miR-210-3p   | NFKB1 |
| HEY1  | hsa-miR-210-3p   | HIF1A |
| HEY1  | hsa-miR-150-5p   | TP53  |
| HEY1  | hsa-miR-130b-3p  | STAT3 |
| HEY1  | hsa-miR-6809-3p  | STAT3 |
| HEY1  | hsa-miR-17-5p    | TGFB1 |
| HEY1  | hsa-miR-17-5p    | TP53  |
| HEY1  | hsa-miR-17-5p    | HIF1A |
| HEY1  | hsa-miR-17-5p    | SMAD3 |
| HEY1  | hsa-miR-199b-5p  | HIF1A |
| HEY1  | hsa-miR-24-3p    | TGFB1 |
| HEY1  | hsa-miR-22-3p    | HIF1A |
| HEY1  | hsa-miR-146b-5p  | NFKB1 |
| HEY1  | hsa-miR-20a-5p   | TP53  |
| HEY1  | hsa-miR-20a-5p   | HIF1A |
| HEY1  | hsa-miR-19a-3p   | TP53  |
| HEY1  | hsa-miR-6511a-5p | HIF1A |
| HEY1  | hsa-miR-3128     | HIF1A |
| HEY1  | hsa-miR-223-3p   | TP53  |
| HEY1  | hsa-miR-92a-3p   | NFKB1 |
| HEY1  | hsa-miR-93-5p    | TGFB1 |
| HEY1  | hsa-miR-93-5p    | STAT3 |
| HEY1  | hsa-miR-93-5p    | HIF1A |

|       |                  |       |
|-------|------------------|-------|
| HEY1  | hsa-miR-4516     | STAT3 |
| HEY1  | hsa-miR-4516     | TP53  |
| HEY1  | hsa-miR-21-5p    | TGFB1 |
| HEY1  | hsa-miR-21-5p    | HIF1A |
| HEY1  | hsa-miR-21-5p    | NFKB1 |
| HEY1  | hsa-miR-4487     | HIF1A |
| HEY1  | hsa-miR-19b-3p   | TGFB1 |
| HEY1  | hsa-miR-19b-3p   | TP53  |
| HEY1  | hsa-miR-324-3p   | TGFB1 |
| HEY1  | hsa-miR-144-3p   | TGFB1 |
| HEY1  | hsa-miR-92b-3p   | SMAD3 |
| HEY1  | hsa-miR-6807-3p  | HIF1A |
| HEY1  | hsa-miR-6875-3p  | STAT3 |
| HEY1  | hsa-miR-6807-5p  | STAT3 |
| HEY1  | hsa-miR-106b-3p  | HIF1A |
| HEY1  | hsa-miR-106b-5p  | STAT3 |
| HEY1  | hsa-miR-106b-5p  | HIF1A |
| HEY1  | hsa-miR-6872-3p  | STAT3 |
| HEY1  | hsa-miR-92a-1-5p | TP53  |
| HEY1  | hsa-miR-18a-3p   | SMAD3 |
| HIF1A | hsa-miR-296-3p   | PTGS2 |
| HIF1A | hsa-miR-211-5p   | TGFB1 |
| HIF1A | hsa-miR-589-5p   | PTGS2 |
| HMGN3 | hsa-miR-4487     | HIF1A |
| HMGN3 | hsa-miR-9-5p     | NFKB1 |
| HMGN3 | hsa-miR-6722-3p  | TP53  |
| HMGN3 | hsa-miR-150-5p   | TP53  |
| HMGN3 | hsa-miR-4441     | STAT3 |
| HMGN3 | hsa-miR-622      | TP53  |
| HMGN3 | hsa-miR-424-5p   | HIF1A |
| HMGN3 | hsa-miR-146b-5p  | NFKB1 |
| HMGN3 | hsa-let-7e-5p    | STAT3 |
| HMGN3 | hsa-miR-223-3p   | TP53  |
| HNF4A | hsa-miR-558      | PTGS2 |
| HNF4A | hsa-miR-558      | HIF1A |
| HNF4A | hsa-miR-3934-5p  | PTGS2 |



|       |                  |       |
|-------|------------------|-------|
| HNF4A | hsa-miR-379-3p   | PTGS2 |
| HNF4A | hsa-miR-5094     | HIF1A |
| HNF4A | hsa-miR-1972     | TP53  |
| HNF4A | hsa-miR-130b-3p  | STAT3 |
| HNF4A | hsa-miR-30d-5p   | TP53  |
| HNF4A | hsa-miR-18a-5p   | TP53  |
| HNF4A | hsa-miR-18a-5p   | HIF1A |
| HNF4A | hsa-miR-18a-5p   | SMAD3 |
| HNF4A | hsa-miR-22-3p    | HIF1A |
| HNF4A | hsa-miR-4470     | HIF1A |
| HNF4A | hsa-miR-26b-5p   | NFKB1 |
| HNF4A | hsa-miR-26b-5p   | PTGS2 |
| HNF4A | hsa-miR-92a-3p   | NFKB1 |
| HNF4A | hsa-miR-874-3p   | STAT3 |
| HNF4A | hsa-miR-3160-3p  | HIF1A |
| HNF4A | hsa-miR-519c-3p  | HIF1A |
| HNF4A | hsa-miR-5681a    | STAT3 |
| HNF4A | hsa-miR-5681b    | HIF1A |
| HNF4A | hsa-miR-4487     | HIF1A |
| HNF4A | hsa-miR-6755-5p  | HIF1A |
| HNF4A | hsa-miR-4662a-5p | HIF1A |
| HNF4A | hsa-miR-101-3p   | PTGS2 |
| HNF4A | hsa-miR-92a-1-5p | TP53  |
| HNF4A | hsa-miR-18a-3p   | SMAD3 |
| HNF4A | hsa-miR-125a-5p  | TP53  |
| HNF4A | hsa-miR-153-5p   | HIF1A |
| HNF4A | hsa-miR-4778-3p  | STAT3 |
| HNF4A | hsa-miR-3128     | HIF1A |
| HNF4A | hsa-miR-5702     | TP53  |
| HNF4A | hsa-miR-146b-5p  | NFKB1 |
| HNF4A | hsa-miR-605-5p   | TP53  |
| HNF4A | hsa-miR-29b-3p   | TGFB1 |
| HNF4A | hsa-miR-138-5p   | HIF1A |
| HNF4A | hsa-miR-335-5p   | IL6   |
| HNF4A | hsa-miR-335-5p   | PTGS2 |
| HNF4A | hsa-miR-335-5p   | SMAD3 |

|       |                  |       |
|-------|------------------|-------|
| HNF4A | hsa-miR-548ah-5p | HIF1A |
| HNF4A | hsa-miR-625-3p   | HIF1A |
| HNF4A | hsa-miR-371b-3p  | STAT3 |
| HNF4A | hsa-miR-5003-5p  | TP53  |
| HNF4A | hsa-miR-7110-3p  | STAT3 |
| HNF4A | hsa-miR-146a-5p  | PTGS2 |
| HNF4A | hsa-miR-146a-5p  | NFKB1 |
| HNF4A | hsa-miR-6806-5p  | HIF1A |
| HNF4A | hsa-miR-19a-3p   | TP53  |
| HNF4A | hsa-miR-122-5p   | TGFB1 |
| HNF4A | hsa-miR-4682     | TP53  |
| HNF4A | hsa-miR-17-5p    | TGFB1 |
| HNF4A | hsa-miR-17-5p    | PTGS2 |
| HNF4A | hsa-miR-17-5p    | HIF1A |
| HNF4A | hsa-miR-17-5p    | SMAD3 |
| HNF4A | hsa-miR-17-5p    | TP53  |
| HNF4A | hsa-let-7a-5p    | IL6   |
| HNF4A | hsa-let-7a-5p    | PTGS2 |
| HNF4A | hsa-let-7a-5p    | NFKB1 |
| HNF4A | hsa-miR-138-2-3p | STAT3 |
| HNF4A | hsa-miR-618      | STAT3 |
| HNF4A | hsa-miR-4270     | STAT3 |
| HNF4A | hsa-miR-4720-3p  | STAT3 |
| HNF4A | hsa-miR-1-3p     | IL6   |
| HNF4A | hsa-miR-6837-5p  | STAT3 |
| HNF4A | hsa-miR-100-5p   | PTGS2 |
| HNF4A | hsa-let-7e-5p    | STAT3 |
| HNF4A | hsa-miR-3165     | TP53  |
| HNF4A | hsa-miR-519d-3p  | STAT3 |
| HNF4A | hsa-miR-519d-3p  | HIF1A |
| HNF4A | hsa-miR-30b-5p   | TP53  |
| HNF4A | hsa-miR-21-5p    | TGFB1 |
| HNF4A | hsa-miR-21-5p    | HIF1A |
| HNF4A | hsa-miR-21-5p    | NFKB1 |
| HNF4A | hsa-miR-19b-3p   | TGFB1 |
| HNF4A | hsa-miR-19b-3p   | TP53  |

|        |                  |       |
|--------|------------------|-------|
| HNF4A  | hsa-miR-128-3p   | PTGS2 |
| HNF4A  | hsa-miR-20a-5p   | TP53  |
| HNF4A  | hsa-miR-20a-5p   | HIF1A |
| HNF4A  | hsa-miR-299-5p   | HIF1A |
| HNF4A  | hsa-miR-7158-5p  | STAT3 |
| HNF4A  | hsa-miR-107      | IL6   |
| HNF4A  | hsa-miR-107      | HIF1A |
| HOXA1  | hsa-miR-9-5p     | NFKB1 |
| HOXA1  | hsa-let-7b-5p    | PTGS2 |
| HOXA1  | hsa-let-7b-5p    | HIF1A |
| HOXA10 | hsa-miR-5702     | TP53  |
| HOXA13 | hsa-miR-18a-5p   | TP53  |
| HOXA13 | hsa-miR-18a-5p   | SMAD3 |
| HOXA13 | hsa-miR-19a-3p   | TP53  |
| HOXA13 | hsa-miR-20a-5p   | TP53  |
| HOXA13 | hsa-miR-19b-3p   | TP53  |
| HOXA13 | hsa-miR-92a-1-5p | TP53  |
| HOXA13 | hsa-miR-18a-3p   | SMAD3 |
| HOXA13 | hsa-miR-6789-3p  | STAT3 |
| HOXA5  | hsa-miR-663a     | TGFB1 |
| HOXA6  | hsa-miR-5692a    | HIF1A |
| HOXB13 | hsa-miR-223-3p   | TP53  |
| HOXC6  | hsa-miR-18a-5p   | TP53  |
| HOXC6  | hsa-miR-18a-5p   | HIF1A |
| HOXC6  | hsa-miR-4470     | HIF1A |
| HOXC6  | hsa-miR-19b-3p   | TP53  |
| HOXC6  | hsa-miR-20a-5p   | TP53  |
| HOXC6  | hsa-miR-20a-5p   | HIF1A |
| HOXC6  | hsa-miR-935      | HIF1A |
| HOXC6  | hsa-miR-19a-3p   | TP53  |
| HOXC6  | hsa-miR-92a-1-5p | TP53  |
| HOXC6  | hsa-miR-17-5p    | PTGS2 |
| HOXC6  | hsa-miR-17-5p    | TP53  |
| HOXC6  | hsa-miR-17-5p    | HIF1A |
| HOXC9  | hsa-miR-4650-5p  | TP53  |
| HOXC9  | hsa-miR-4282     | HIF1A |

|       |                 |       |
|-------|-----------------|-------|
| HOXC9 | hsa-miR-16-5p   | NFKB1 |
| HOXC9 | hsa-miR-16-5p   | TP53  |
| HOXC9 | hsa-miR-214-3p  | TP53  |
| HOXC9 | hsa-miR-6815-3p | HIF1A |
| HOXC9 | hsa-miR-199a-5p | NFKB1 |
| HOXC9 | hsa-miR-199a-5p | HIF1A |
| HOXC9 | hsa-miR-449c-5p | HIF1A |
| HOXC9 | hsa-miR-5193    | TP53  |
| HOXC9 | hsa-let-7a-5p   | NFKB1 |
| HOXC9 | hsa-miR-618     | STAT3 |
| HOXC9 | hsa-miR-4487    | HIF1A |
| HOXC9 | hsa-miR-199b-5p | HIF1A |
| HOXC9 | hsa-miR-155-5p  | NFKB1 |
| HSF1  | hsa-miR-210-3p  | HIF1A |
| HSF1  | hsa-miR-4684-5p | STAT3 |
| HSF1  | hsa-miR-130b-3p | STAT3 |
| HSF1  | hsa-miR-22-3p   | HIF1A |
| HSF1  | hsa-miR-4470    | HIF1A |
| HSF1  | hsa-miR-4499    | HIF1A |
| HSF1  | hsa-miR-6845-3p | STAT3 |
| HSF1  | hsa-miR-2682-5p | HIF1A |
| HSF1  | hsa-miR-4418    | HIF1A |
| HSF1  | hsa-miR-124-3p  | STAT3 |
| IKZF1 | hsa-miR-146a-5p | NFKB1 |
| IKZF1 | hsa-miR-21-5p   | NFKB1 |
| IKZF1 | hsa-let-7a-5p   | NFKB1 |
| IKZF1 | hsa-miR-155-5p  | NFKB1 |
| IRF1  | hsa-miR-18a-5p  | TP53  |
| IRF1  | hsa-miR-18a-5p  | HIF1A |
| IRF1  | hsa-miR-18a-5p  | SMAD3 |
| IRF1  | hsa-miR-9-5p    | NFKB1 |
| IRF1  | hsa-miR-625-3p  | HIF1A |
| IRF1  | hsa-miR-4799-5p | HIF1A |
| IRF1  | hsa-miR-5095    | STAT3 |
| IRF1  | hsa-miR-22-3p   | HIF1A |
| IRF1  | hsa-miR-4441    | STAT3 |

|      |                 |       |
|------|-----------------|-------|
| IRF1 | hsa-miR-4470    | HIF1A |
| IRF1 | hsa-miR-6789-3p | STAT3 |
| IRF1 | hsa-miR-371b-3p | STAT3 |
| IRF1 | hsa-miR-223-3p  | IL6   |
| IRF1 | hsa-miR-223-3p  | TP53  |
| IRF1 | hsa-miR-145-5p  | SMAD3 |
| IRF1 | hsa-miR-449c-5p | HIF1A |
| IRF1 | hsa-miR-30e-5p  | TP53  |
| IRF1 | hsa-miR-17-5p   | TGFB1 |
| IRF1 | hsa-miR-17-5p   | TP53  |
| IRF1 | hsa-miR-17-5p   | HIF1A |
| IRF1 | hsa-miR-17-5p   | SMAD3 |
| IRF1 | hsa-miR-203a-3p | IL6   |
| IRF1 | hsa-miR-144-3p  | TGFB1 |
| IRF1 | hsa-miR-92b-3p  | SMAD3 |
| IRF1 | hsa-miR-4487    | HIF1A |
| IRF1 | hsa-miR-6875-3p | STAT3 |
| IRF1 | hsa-miR-3609    | HIF1A |
| IRF1 | hsa-miR-1181    | STAT3 |
| IRF1 | hsa-miR-155-5p  | IL6   |
| IRF1 | hsa-miR-155-5p  | NFKB1 |
| IRF1 | hsa-miR-155-5p  | SMAD3 |
| IRF1 | hsa-miR-6872-3p | STAT3 |
| IRF1 | hsa-miR-195-5p  | SMAD3 |
| IRF1 | hsa-miR-18a-3p  | SMAD3 |
| IRF3 | hsa-miR-130b-3p | STAT3 |
| IRF3 | hsa-miR-365a-5p | STAT3 |
| IRF3 | hsa-miR-6809-3p | STAT3 |
| IRF4 | hsa-miR-9-5p    | NFKB1 |
| IRF4 | hsa-miR-139-5p  | NFKB1 |
| IRF4 | hsa-miR-4270    | STAT3 |
| IRF4 | hsa-let-7a-5p   | NFKB1 |
| IRF4 | hsa-miR-130a-3p | TGFB1 |
| IRF4 | hsa-miR-130a-3p | TNF   |
| IRF4 | hsa-miR-6871-3p | STAT3 |
| IRF4 | hsa-miR-30e-5p  | TP53  |

|      |                 |       |
|------|-----------------|-------|
| IRF4 | hsa-miR-663a    | TGFB1 |
| IRF4 | hsa-miR-6760-5p | TP53  |
| IRF4 | hsa-miR-29b-3p  | TGFB1 |
| IRF4 | hsa-let-7i-5p   | TLR4  |
| IRF4 | hsa-miR-6872-3p | STAT3 |
| IRF5 | hsa-miR-9-5p    | NFKB1 |
| IRF5 | hsa-miR-625-3p  | HIF1A |
| IRF5 | hsa-miR-24-3p   | TGFB1 |
| IRF5 | hsa-miR-2682-5p | HIF1A |
| IRF5 | hsa-miR-6893-5p | HIF1A |
| IRF5 | hsa-let-7b-5p   | HIF1A |
| IRF5 | hsa-miR-29b-3p  | TGFB1 |
| IRF5 | hsa-miR-6807-3p | HIF1A |
| IRF5 | hsa-miR-124-3p  | IL6   |
| IRF5 | hsa-miR-138-5p  | HIF1A |
| JUN  | hsa-miR-132-3p  | PTGS2 |
| JUN  | hsa-miR-1178-3p | STAT3 |
| JUN  | hsa-miR-26a-5p  | IL6   |
| JUN  | hsa-miR-625-3p  | HIF1A |
| JUN  | hsa-miR-4799-5p | HIF1A |
| JUN  | hsa-miR-1908-5p | PTGS2 |
| JUN  | hsa-miR-4282    | HIF1A |
| JUN  | hsa-miR-663a    | TGFB1 |
| JUN  | hsa-miR-100-5p  | PTGS2 |
| JUN  | hsa-miR-424-5p  | HIF1A |
| JUN  | hsa-miR-942-5p  | TLR4  |
| JUN  | hsa-miR-6809-3p | STAT3 |
| JUN  | hsa-miR-548g-3p | TLR4  |
| JUN  | hsa-miR-130b-3p | STAT3 |
| JUN  | hsa-miR-18a-5p  | TP53  |
| JUN  | hsa-miR-18a-5p  | HIF1A |
| JUN  | hsa-miR-18a-5p  | SMAD3 |
| JUN  | hsa-miR-24-3p   | TGFB1 |
| JUN  | hsa-miR-22-3p   | HIF1A |
| JUN  | hsa-miR-5692a   | HIF1A |
| JUN  | hsa-miR-324-3p  | TGFB1 |

|     |                  |       |
|-----|------------------|-------|
| JUN | hsa-miR-3165     | TP53  |
| JUN | hsa-miR-124-3p   | IL6   |
| JUN | hsa-miR-124-3p   | PTGS2 |
| JUN | hsa-miR-124-3p   | STAT3 |
| JUN | hsa-miR-935      | HIF1A |
| JUN | hsa-miR-19a-3p   | TP53  |
| JUN | hsa-miR-1296-3p  | TP53  |
| JUN | hsa-miR-4738-3p  | TLR4  |
| JUN | hsa-miR-210-3p   | NFKB1 |
| JUN | hsa-miR-210-3p   | HIF1A |
| JUN | hsa-miR-4659a-3p | TLR4  |
| JUN | hsa-miR-4531     | TP53  |
| JUN | hsa-miR-21-5p    | TGFB1 |
| JUN | hsa-miR-21-5p    | TLR4  |
| JUN | hsa-miR-21-5p    | HIF1A |
| JUN | hsa-miR-21-5p    | NFKB1 |
| JUN | hsa-miR-320a     | PTGS2 |
| JUN | hsa-miR-652-3p   | PTGS2 |
| JUN | hsa-miR-3934-5p  | PTGS2 |
| JUN | hsa-miR-145-5p   | SMAD3 |
| JUN | hsa-miR-4748     | HIF1A |
| JUN | hsa-miR-17-5p    | TGFB1 |
| JUN | hsa-miR-17-5p    | PTGS2 |
| JUN | hsa-miR-17-5p    | HIF1A |
| JUN | hsa-miR-17-5p    | SMAD3 |
| JUN | hsa-miR-17-5p    | TP53  |
| JUN | hsa-let-7a-5p    | IL6   |
| JUN | hsa-let-7a-5p    | PTGS2 |
| JUN | hsa-let-7a-5p    | NFKB1 |
| JUN | hsa-miR-6760-5p  | TP53  |
| JUN | hsa-miR-30b-5p   | TP53  |
| JUN | hsa-miR-6875-3p  | STAT3 |
| JUN | hsa-miR-9-5p     | NFKB1 |
| JUN | hsa-miR-4487     | HIF1A |
| JUN | hsa-miR-7113-5p  | STAT3 |
| JUN | hsa-miR-4659b-3p | TLR4  |

|      |                 |       |
|------|-----------------|-------|
| JUN  | hsa-miR-7-5p    | TLR4  |
| JUN  | hsa-miR-6871-3p | STAT3 |
| JUN  | hsa-miR-3609    | HIF1A |
| JUN  | hsa-miR-3662    | HIF1A |
| JUN  | hsa-miR-20a-5p  | TP53  |
| JUN  | hsa-miR-20a-5p  | HIF1A |
| JUN  | hsa-miR-1181    | STAT3 |
| JUN  | hsa-miR-138-5p  | HIF1A |
| JUN  | hsa-miR-744-5p  | PTGS2 |
| JUN  | hsa-miR-744-5p  | TGFB1 |
| JUN  | hsa-miR-4470    | HIF1A |
| JUN  | hsa-miR-18a-3p  | SMAD3 |
| JUN  | hsa-miR-922     | STAT3 |
| JUNB | hsa-miR-9-5p    | NFKB1 |
| JUNB | hsa-miR-4271    | TP53  |
| JUNB | hsa-miR-146b-5p | NFKB1 |
| JUNB | hsa-miR-138-5p  | HIF1A |
| JUNB | hsa-miR-6815-3p | HIF1A |
| JUNB | hsa-miR-17-5p   | TGFB1 |
| JUNB | hsa-miR-17-5p   | TP53  |
| JUNB | hsa-miR-17-5p   | HIF1A |
| JUNB | hsa-miR-17-5p   | SMAD3 |
| JUNB | hsa-miR-142-3p  | IL6   |
| JUND | hsa-miR-210-3p  | NFKB1 |
| JUND | hsa-miR-210-3p  | HIF1A |
| JUND | hsa-miR-150-5p  | TP53  |
| JUND | hsa-miR-365a-3p | IL6   |
| JUND | hsa-miR-130b-3p | STAT3 |
| JUND | hsa-miR-942-5p  | TLR4  |
| JUND | hsa-miR-143-3p  | PTGS2 |
| JUND | hsa-miR-143-3p  | SMAD3 |
| JUND | hsa-miR-214-3p  | TP53  |
| JUND | hsa-miR-22-3p   | HIF1A |
| JUND | hsa-miR-4470    | HIF1A |
| JUND | hsa-miR-548g-3p | TLR4  |
| JUND | hsa-miR-146b-5p | NFKB1 |



|      |                  |       |
|------|------------------|-------|
| JUND | hsa-miR-146b-5p  | TLR4  |
| JUND | hsa-let-7i-5p    | TLR4  |
| JUND | hsa-miR-3160-3p  | HIF1A |
| JUND | hsa-miR-199a-3p  | PTGS2 |
| JUND | hsa-miR-144-3p   | TGFB1 |
| JUND | hsa-miR-6807-3p  | HIF1A |
| JUND | hsa-miR-4487     | HIF1A |
| JUND | hsa-miR-92b-3p   | SMAD3 |
| JUND | hsa-miR-4659b-3p | TLR4  |
| JUND | hsa-miR-124-3p   | IL6   |
| JUND | hsa-miR-124-3p   | PTGS2 |
| JUND | hsa-miR-124-3p   | STAT3 |
| JUND | hsa-miR-106b-5p  | STAT3 |
| JUND | hsa-miR-106b-5p  | HIF1A |
| JUND | hsa-miR-199b-5p  | HIF1A |
| JUND | hsa-miR-744-5p   | PTGS2 |
| JUND | hsa-miR-744-5p   | TGFB1 |
| JUND | hsa-miR-101-3p   | PTGS2 |
| JUND | hsa-miR-139-5p   | NFKB1 |
| JUND | hsa-miR-4799-5p  | HIF1A |
| JUND | hsa-miR-153-5p   | HIF1A |
| JUND | hsa-miR-4282     | HIF1A |
| JUND | hsa-miR-33a-5p   | HIF1A |
| JUND | hsa-miR-24-3p    | TGFB1 |
| JUND | hsa-miR-4441     | STAT3 |
| JUND | hsa-miR-5692a    | HIF1A |
| JUND | hsa-miR-26a-5p   | IL6   |
| JUND | hsa-miR-6511a-5p | HIF1A |
| JUND | hsa-miR-4738-3p  | TLR4  |
| JUND | hsa-miR-324-3p   | TGFB1 |
| JUND | hsa-miR-93-5p    | TGFB1 |
| JUND | hsa-miR-93-5p    | STAT3 |
| JUND | hsa-miR-93-5p    | HIF1A |
| JUND | hsa-miR-4290     | SMAD3 |
| JUND | hsa-miR-605-5p   | TP53  |
| JUND | hsa-miR-6789-3p  | STAT3 |

|      |                 |       |
|------|-----------------|-------|
| JUND | hsa-miR-1322    | HIF1A |
| JUND | hsa-miR-138-5p  | HIF1A |
| JUND | hsa-miR-34b-5p  | HIF1A |
| JUND | hsa-miR-320a    | PTGS2 |
| JUND | hsa-miR-132-3p  | PTGS2 |
| JUND | hsa-miR-203a-3p | IL6   |
| JUND | hsa-miR-9-5p    | NFKB1 |
| JUND | hsa-miR-371b-3p | STAT3 |
| JUND | hsa-miR-5193    | TP53  |
| JUND | hsa-miR-6809-3p | STAT3 |
| JUND | hsa-miR-6760-5p | TP53  |
| JUND | hsa-miR-5197-5p | TP53  |
| JUND | hsa-miR-935     | HIF1A |
| JUND | hsa-miR-1296-3p | TP53  |
| JUND | hsa-miR-29b-3p  | TGFB1 |
| JUND | hsa-miR-4531    | TP53  |
| JUND | hsa-miR-6815-3p | HIF1A |
| JUND | hsa-miR-3074-3p | HIF1A |
| JUND | hsa-miR-1468-3p | TLR4  |
| JUND | hsa-miR-17-5p   | TGFB1 |
| JUND | hsa-miR-17-5p   | PTGS2 |
| JUND | hsa-miR-17-5p   | HIF1A |
| JUND | hsa-miR-17-5p   | SMAD3 |
| JUND | hsa-miR-17-5p   | TP53  |
| JUND | hsa-let-7a-5p   | IL6   |
| JUND | hsa-let-7a-5p   | PTGS2 |
| JUND | hsa-let-7a-5p   | NFKB1 |
| JUND | hsa-miR-6872-3p | STAT3 |
| JUND | hsa-miR-618     | STAT3 |
| JUND | hsa-miR-3662    | HIF1A |
| JUND | hsa-miR-922     | STAT3 |
| JUND | hsa-miR-3668    | HIF1A |
| JUND | hsa-miR-1181    | STAT3 |
| JUND | hsa-miR-155-5p  | IL6   |
| JUND | hsa-miR-155-5p  | NFKB1 |
| JUND | hsa-miR-155-5p  | SMAD3 |

|       |                  |       |
|-------|------------------|-------|
| JUND  | hsa-miR-365a-5p  | STAT3 |
| JUND  | hsa-miR-138-2-3p | STAT3 |
| JUND  | hsa-miR-100-5p   | PTGS2 |
| JUND  | hsa-miR-130a-3p  | TGFB1 |
| JUND  | hsa-miR-195-5p   | SMAD3 |
| JUND  | hsa-miR-193b-3p  | SMAD3 |
| JUND  | hsa-miR-3165     | TP53  |
| JUND  | hsa-miR-30b-5p   | TP53  |
| JUND  | hsa-miR-4659a-3p | TLR4  |
| JUND  | hsa-miR-4516     | STAT3 |
| JUND  | hsa-miR-4516     | TP53  |
| JUND  | hsa-miR-223-3p   | IL6   |
| JUND  | hsa-miR-223-3p   | TP53  |
| JUND  | hsa-miR-21-5p    | TGFB1 |
| JUND  | hsa-miR-21-5p    | TLR4  |
| JUND  | hsa-miR-21-5p    | HIF1A |
| JUND  | hsa-miR-21-5p    | NFKB1 |
| JUND  | hsa-miR-199a-5p  | PTGS2 |
| JUND  | hsa-miR-199a-5p  | HIF1A |
| JUND  | hsa-miR-199a-5p  | NFKB1 |
| JUND  | hsa-miR-145-5p   | SMAD3 |
| JUND  | hsa-miR-449c-5p  | HIF1A |
| JUND  | hsa-miR-7-5p     | TLR4  |
| JUND  | hsa-miR-4650-5p  | TP53  |
| JUND  | hsa-miR-181a-5p  | PTGS2 |
| JUND  | hsa-miR-181a-5p  | STAT3 |
| JUND  | hsa-let-7b-5p    | PTGS2 |
| JUND  | hsa-let-7b-5p    | TLR4  |
| JUND  | hsa-let-7b-5p    | HIF1A |
| JUND  | hsa-miR-128-3p   | PTGS2 |
| JUND  | hsa-miR-6807-5p  | STAT3 |
| JUND  | hsa-miR-106b-3p  | HIF1A |
| KDM5A | hsa-miR-92a-2-5p | TP53  |
| KDM5A | hsa-miR-3934-5p  | PTGS2 |
| KDM5A | hsa-miR-150-5p   | TP53  |
| KDM5A | hsa-miR-576-3p   | HIF1A |

|       |                 |       |
|-------|-----------------|-------|
| KDM5A | hsa-miR-519c-3p | HIF1A |
| KDM5A | hsa-miR-33a-5p  | HIF1A |
| KDM5A | hsa-miR-4306    | TP53  |
| KDM5A | hsa-miR-4768-5p | STAT3 |
| KDM5A | hsa-miR-874-3p  | STAT3 |
| KDM5A | hsa-miR-3160-3p | HIF1A |
| KDM5A | hsa-miR-8055    | HIF1A |
| KDM5A | hsa-miR-7151-3p | STAT3 |
| KDM5A | hsa-miR-7113-5p | STAT3 |
| KDM5A | hsa-miR-124-3p  | PTGS2 |
| KDM5A | hsa-miR-124-3p  | STAT3 |
| KDM5A | hsa-miR-106b-5p | STAT3 |
| KDM5A | hsa-miR-106b-5p | HIF1A |
| KDM5A | hsa-miR-1234-3p | STAT3 |
| KDM5A | hsa-miR-199b-5p | HIF1A |
| KDM5A | hsa-miR-365b-5p | STAT3 |
| KDM5A | hsa-miR-889-3p  | HIF1A |
| KDM5A | hsa-miR-491-5p  | TP53  |
| KDM5A | hsa-miR-491-5p  | SMAD3 |
| KDM5A | hsa-miR-153-5p  | HIF1A |
| KDM5A | hsa-miR-4685-5p | STAT3 |
| KDM5A | hsa-miR-4286    | TP53  |
| KDM5A | hsa-miR-4418    | HIF1A |
| KDM5A | hsa-miR-6871-3p | STAT3 |
| KDM5A | hsa-miR-93-5p   | STAT3 |
| KDM5A | hsa-miR-93-5p   | HIF1A |
| KDM5A | hsa-miR-4419a   | TP53  |
| KDM5A | hsa-miR-652-3p  | PTGS2 |
| KDM5A | hsa-miR-4290    | SMAD3 |
| KDM5A | hsa-miR-6760-5p | TP53  |
| KDM5A | hsa-miR-1322    | HIF1A |
| KDM5A | hsa-miR-329-5p  | HIF1A |
| KDM5A | hsa-miR-34b-5p  | HIF1A |
| KDM5A | hsa-miR-625-3p  | HIF1A |
| KDM5A | hsa-miR-18b-5p  | HIF1A |
| KDM5A | hsa-miR-5003-5p | TP53  |

|       |                 |       |
|-------|-----------------|-------|
| KDM5A | hsa-miR-7110-3p | STAT3 |
| KDM5A | hsa-miR-146a-5p | PTGS2 |
| KDM5A | hsa-miR-3529-3p | TP53  |
| KDM5A | hsa-miR-3529-3p | SMAD3 |
| KDM5A | hsa-miR-4682    | TP53  |
| KDM5A | hsa-miR-30e-5p  | TP53  |
| KDM5A | hsa-miR-1181    | STAT3 |
| KDM5A | hsa-miR-4720-3p | STAT3 |
| KDM5A | hsa-miR-106a-3p | HIF1A |
| KDM5A | hsa-miR-130a-3p | TNF   |
| KDM5A | hsa-miR-195-5p  | SMAD3 |
| KDM5A | hsa-miR-519d-3p | STAT3 |
| KDM5A | hsa-miR-519d-3p | HIF1A |
| KDM5A | hsa-miR-21-5p   | HIF1A |
| KDM5A | hsa-miR-19b-3p  | TP53  |
| KDM5A | hsa-miR-145-5p  | SMAD3 |
| KDM5A | hsa-miR-20b-5p  | HIF1A |
| KDM5A | hsa-miR-128-3p  | PTGS2 |
| KDM5A | hsa-miR-106b-3p | HIF1A |
| KDM5A | hsa-miR-106a-5p | TP53  |
| KDM5A | hsa-miR-4725-3p | TP53  |
| KDM5B | hsa-miR-132-3p  | PTGS2 |
| KDM5B | hsa-miR-1-3p    | IL6   |
| KDM5B | hsa-miR-149-5p  | IL6   |
| KDM5B | hsa-miR-3934-5p | PTGS2 |
| KDM5B | hsa-miR-9-5p    | NFKB1 |
| KDM5B | hsa-miR-6842-5p | TP53  |
| KDM5B | hsa-miR-4684-5p | STAT3 |
| KDM5B | hsa-let-7a-5p   | IL6   |
| KDM5B | hsa-let-7a-5p   | PTGS2 |
| KDM5B | hsa-let-7a-5p   | NFKB1 |
| KDM5B | hsa-miR-151a-3p | HIF1A |
| KDM5B | hsa-miR-10b-5p  | TP53  |
| KDM5B | hsa-let-7b-5p   | PTGS2 |
| KDM5B | hsa-let-7b-5p   | HIF1A |
| KDM5B | hsa-miR-30d-5p  | TP53  |

|       |                  |       |
|-------|------------------|-------|
| KDM5B | hsa-miR-34b-5p   | HIF1A |
| KDM5B | hsa-miR-130a-3p  | TGFB1 |
| KDM5B | hsa-miR-130a-3p  | TNF   |
| KDM5B | hsa-miR-7113-5p  | STAT3 |
| KDM5B | hsa-miR-199a-5p  | PTGS2 |
| KDM5B | hsa-miR-199a-5p  | HIF1A |
| KDM5B | hsa-miR-199a-5p  | NFKB1 |
| KDM5B | hsa-miR-24-3p    | TGFB1 |
| KDM5B | hsa-miR-22-3p    | HIF1A |
| KDM5B | hsa-miR-4470     | HIF1A |
| KDM5B | hsa-miR-5581-3p  | STAT3 |
| KDM5B | hsa-miR-500b-3p  | STAT3 |
| KDM5B | hsa-miR-6845-3p  | STAT3 |
| KDM5B | hsa-miR-2682-5p  | HIF1A |
| KDM5B | hsa-miR-146b-5p  | NFKB1 |
| KDM5B | hsa-miR-153-5p   | HIF1A |
| KDM5B | hsa-miR-137      | PTGS2 |
| KDM5B | hsa-miR-4531     | TP53  |
| KDM5B | hsa-miR-142-3p   | IL6   |
| KDM5B | hsa-miR-6893-5p  | HIF1A |
| KDM5B | hsa-miR-30e-5p   | TP53  |
| KDM5B | hsa-miR-199a-3p  | PTGS2 |
| KDM5B | hsa-miR-6872-3p  | STAT3 |
| KDM5B | hsa-miR-149-3p   | TP53  |
| KDM5B | hsa-miR-138-2-3p | STAT3 |
| KDM5B | hsa-miR-589-5p   | PTGS2 |
| KDM5B | hsa-miR-329-5p   | HIF1A |
| KDM5B | hsa-miR-4487     | HIF1A |
| KDM5B | hsa-miR-200a-3p  | TP53  |
| KDM5B | hsa-miR-124-3p   | IL6   |
| KDM5B | hsa-miR-124-3p   | PTGS2 |
| KDM5B | hsa-miR-124-3p   | STAT3 |
| KDM5B | hsa-miR-138-5p   | HIF1A |
| KDM5B | hsa-miR-922      | STAT3 |
| KDM5B | hsa-miR-1181     | STAT3 |
| KDM5B | hsa-miR-4441     | STAT3 |

|       |                 |       |
|-------|-----------------|-------|
| KDM5B | hsa-miR-223-3p  | IL6   |
| KDM5B | hsa-miR-223-3p  | TP53  |
| KLF1  | hsa-miR-1322    | HIF1A |
| KLF1  | hsa-miR-4271    | TP53  |
| KLF1  | hsa-miR-625-3p  | HIF1A |
| KLF1  | hsa-miR-4748    | HIF1A |
| KLF1  | hsa-miR-33a-5p  | HIF1A |
| KLF1  | hsa-miR-143-3p  | PTGS2 |
| KLF4  | hsa-miR-3074-3p | HIF1A |
| KLF4  | hsa-miR-3160-3p | HIF1A |
| KLF4  | hsa-miR-8071    | TP53  |
| KLF4  | hsa-miR-5692a   | HIF1A |
| KLF4  | hsa-miR-365b-5p | STAT3 |
| KLF4  | hsa-miR-5003-5p | TP53  |
| KLF4  | hsa-miR-24-3p   | TGFB1 |
| KLF4  | hsa-miR-4725-3p | TP53  |
| KLF5  | hsa-miR-889-3p  | HIF1A |
| KLF5  | hsa-miR-371b-3p | STAT3 |
| KLF5  | hsa-let-7a-5p   | PTGS2 |
| KLF5  | hsa-let-7a-5p   | NFKB1 |
| KLF5  | hsa-miR-30d-5p  | TP53  |
| KLF5  | hsa-miR-26b-5p  | NFKB1 |
| KLF5  | hsa-miR-26b-5p  | PTGS2 |
| KLF5  | hsa-miR-519d-3p | STAT3 |
| KLF5  | hsa-miR-519d-3p | HIF1A |
| KLF5  | hsa-miR-622     | TP53  |
| KLF5  | hsa-miR-1908-5p | PTGS2 |
| KLF5  | hsa-miR-4516    | STAT3 |
| KLF5  | hsa-miR-4516    | TP53  |
| KLF5  | hsa-miR-6815-3p | HIF1A |
| KLF5  | hsa-miR-8071    | TP53  |
| KLF5  | hsa-miR-449c-5p | HIF1A |
| KLF5  | hsa-miR-6872-3p | STAT3 |
| KLF5  | hsa-miR-144-3p  | TGFB1 |
| KLF5  | hsa-let-7b-5p   | PTGS2 |
| KLF5  | hsa-let-7b-5p   | HIF1A |

|      |                  |       |
|------|------------------|-------|
| KLF5 | hsa-miR-4271     | TP53  |
| KLF5 | hsa-miR-200a-3p  | TP53  |
| KLF5 | hsa-miR-200a-3p  | SMAD3 |
| KLF5 | hsa-miR-124-3p   | PTGS2 |
| KLF5 | hsa-miR-124-3p   | STAT3 |
| KLF5 | hsa-miR-138-5p   | HIF1A |
| KLF5 | hsa-miR-3668     | HIF1A |
| KLF5 | hsa-miR-199b-5p  | HIF1A |
| KLF5 | hsa-miR-130b-3p  | STAT3 |
| LEF1 | hsa-miR-9-5p     | NFKB1 |
| LEF1 | hsa-miR-210-3p   | NFKB1 |
| LEF1 | hsa-miR-210-3p   | HIF1A |
| LEF1 | hsa-miR-877-3p   | STAT3 |
| LEF1 | hsa-miR-935      | HIF1A |
| LEF1 | hsa-miR-6511a-5p | HIF1A |
| LEF1 | hsa-miR-6845-3p  | STAT3 |
| LEF1 | hsa-miR-6893-5p  | HIF1A |
| LEF1 | hsa-miR-449c-5p  | HIF1A |
| LEF1 | hsa-miR-940      | HIF1A |
| LEF1 | hsa-miR-6875-3p  | STAT3 |
| LEF1 | hsa-miR-124-3p   | STAT3 |
| LEF1 | hsa-miR-138-5p   | HIF1A |
| LEF1 | hsa-miR-1234-3p  | STAT3 |
| LEF1 | hsa-miR-34b-5p   | HIF1A |
| LYL1 | hsa-miR-18a-5p   | TP53  |
| LYL1 | hsa-miR-18a-5p   | HIF1A |
| LYL1 | hsa-miR-18a-5p   | SMAD3 |
| LYL1 | hsa-miR-17-5p    | PTGS2 |
| LYL1 | hsa-miR-17-5p    | TP53  |
| LYL1 | hsa-miR-17-5p    | HIF1A |
| LYL1 | hsa-miR-17-5p    | SMAD3 |
| LYL1 | hsa-miR-19b-3p   | TP53  |
| LYL1 | hsa-miR-20a-5p   | TP53  |
| LYL1 | hsa-miR-20a-5p   | HIF1A |
| LYL1 | hsa-let-7a-5p    | PTGS2 |
| LYL1 | hsa-miR-6872-3p  | STAT3 |



|      |                  |       |
|------|------------------|-------|
| LYL1 | hsa-miR-92a-1-5p | TP53  |
| LYL1 | hsa-miR-18a-3p   | SMAD3 |
| LYL1 | hsa-miR-19a-3p   | TP53  |
| MAFF | hsa-miR-18a-5p   | TP53  |
| MAFF | hsa-miR-18a-5p   | HIF1A |
| MAFF | hsa-miR-18a-5p   | SMAD3 |
| MAFF | hsa-miR-558      | HIF1A |
| MAFF | hsa-miR-889-3p   | HIF1A |
| MAFF | hsa-miR-19a-3p   | TP53  |
| MAFF | hsa-miR-106b-5p  | STAT3 |
| MAFF | hsa-miR-106b-5p  | HIF1A |
| MAFF | hsa-miR-93-5p    | STAT3 |
| MAFF | hsa-miR-93-5p    | HIF1A |
| MAFF | hsa-miR-5702     | TP53  |
| MAFF | hsa-miR-17-5p    | TP53  |
| MAFF | hsa-miR-17-5p    | HIF1A |
| MAFF | hsa-miR-17-5p    | SMAD3 |
| MAFF | hsa-miR-6760-5p  | TP53  |
| MAFF | hsa-miR-106a-3p  | HIF1A |
| MAFF | hsa-miR-4271     | TP53  |
| MAFF | hsa-miR-20a-5p   | TP53  |
| MAFF | hsa-miR-20a-5p   | HIF1A |
| MAFF | hsa-miR-106b-3p  | HIF1A |
| MAFF | hsa-miR-155-5p   | IL6   |
| MAFF | hsa-miR-155-5p   | SMAD3 |
| MAFF | hsa-miR-18a-3p   | SMAD3 |
| MAFF | hsa-miR-106a-5p  | IL10  |
| MAFF | hsa-miR-106a-5p  | TP53  |
| MAFK | hsa-miR-18a-5p   | TP53  |
| MAFK | hsa-miR-18a-5p   | HIF1A |
| MAFK | hsa-miR-18a-5p   | SMAD3 |
| MAFK | hsa-miR-26a-5p   | IL6   |
| MAFK | hsa-miR-1-3p     | IL6   |
| MAFK | hsa-miR-1-3p     | TLR4  |
| MAFK | hsa-miR-20b-5p   | HIF1A |
| MAFK | hsa-miR-4799-5p  | HIF1A |

|      |                  |       |
|------|------------------|-------|
| MAFK | hsa-miR-1908-5p  | PTGS2 |
| MAFK | hsa-miR-18b-5p   | HIF1A |
| MAFK | hsa-miR-4282     | HIF1A |
| MAFK | hsa-miR-130b-3p  | STAT3 |
| MAFK | hsa-miR-4487     | HIF1A |
| MAFK | hsa-miR-519c-3p  | HIF1A |
| MAFK | hsa-miR-130a-3p  | TGFB1 |
| MAFK | hsa-miR-199a-5p  | PTGS2 |
| MAFK | hsa-miR-199a-5p  | HIF1A |
| MAFK | hsa-miR-335-5p   | IL6   |
| MAFK | hsa-miR-335-5p   | PTGS2 |
| MAFK | hsa-miR-335-5p   | IL17A |
| MAFK | hsa-miR-335-5p   | TLR4  |
| MAFK | hsa-miR-335-5p   | SMAD3 |
| MAFK | hsa-miR-22-3p    | HIF1A |
| MAFK | hsa-miR-155-5p   | IL6   |
| MAFK | hsa-miR-155-5p   | SMAD3 |
| MAFK | hsa-miR-193b-3p  | SMAD3 |
| MAFK | hsa-miR-5581-3p  | STAT3 |
| MAFK | hsa-miR-19a-3p   | TP53  |
| MAFK | hsa-miR-3128     | HIF1A |
| MAFK | hsa-miR-1296-3p  | TP53  |
| MAFK | hsa-miR-4738-3p  | TLR4  |
| MAFK | hsa-miR-199a-3p  | PTGS2 |
| MAFK | hsa-miR-142-3p   | IL6   |
| MAFK | hsa-miR-4659a-3p | TLR4  |
| MAFK | hsa-miR-4531     | TP53  |
| MAFK | hsa-miR-132-3p   | PTGS2 |
| MAFK | hsa-miR-1322     | HIF1A |
| MAFK | hsa-miR-21-5p    | TGFB1 |
| MAFK | hsa-miR-21-5p    | TLR4  |
| MAFK | hsa-miR-21-5p    | HIF1A |
| MAFK | hsa-miR-6815-3p  | HIF1A |
| MAFK | hsa-miR-4441     | STAT3 |
| MAFK | hsa-miR-1468-3p  | TLR4  |
| MAFK | hsa-miR-618      | STAT3 |

|      |                  |       |
|------|------------------|-------|
| MAFK | hsa-miR-4290     | SMAD3 |
| MAFK | hsa-miR-449c-5p  | HIF1A |
| MAFK | hsa-miR-17-5p    | TGFB1 |
| MAFK | hsa-miR-17-5p    | PTGS2 |
| MAFK | hsa-miR-17-5p    | HIF1A |
| MAFK | hsa-miR-17-5p    | SMAD3 |
| MAFK | hsa-miR-17-5p    | TP53  |
| MAFK | hsa-let-7a-5p    | IL6   |
| MAFK | hsa-let-7a-5p    | PTGS2 |
| MAFK | hsa-miR-365a-3p  | IL6   |
| MAFK | hsa-miR-371b-3p  | STAT3 |
| MAFK | hsa-miR-106a-3p  | HIF1A |
| MAFK | hsa-let-7i-5p    | TLR4  |
| MAFK | hsa-miR-320a     | PTGS2 |
| MAFK | hsa-miR-4271     | TP53  |
| MAFK | hsa-miR-93-5p    | TGFB1 |
| MAFK | hsa-miR-93-5p    | STAT3 |
| MAFK | hsa-miR-93-5p    | HIF1A |
| MAFK | hsa-miR-4659b-3p | TLR4  |
| MAFK | hsa-miR-365a-5p  | STAT3 |
| MAFK | hsa-miR-106b-3p  | HIF1A |
| MAFK | hsa-miR-106a-5p  | IL10  |
| MAFK | hsa-miR-106a-5p  | TP53  |
| MAFK | hsa-miR-106b-5p  | STAT3 |
| MAFK | hsa-miR-106b-5p  | HIF1A |
| MAFK | hsa-miR-6872-3p  | STAT3 |
| MAFK | hsa-miR-199b-5p  | HIF1A |
| MAFK | hsa-miR-18a-3p   | SMAD3 |
| MAFK | hsa-miR-223-3p   | IL6   |
| MAFK | hsa-miR-223-3p   | TP53  |
| MAFK | hsa-miR-7158-5p  | STAT3 |
| MAFK | hsa-miR-107      | IL6   |
| MAFK | hsa-miR-107      | HIF1A |
| MAX  | hsa-miR-3934-5p  | PTGS2 |
| MAX  | hsa-miR-203a-3p  | IL6   |
| MAX  | hsa-miR-203a-3p  | TNF   |

|     |                  |       |
|-----|------------------|-------|
| MAX | hsa-miR-210-3p   | NFKB1 |
| MAX | hsa-miR-210-3p   | HIF1A |
| MAX | hsa-miR-150-5p   | TP53  |
| MAX | hsa-miR-379-3p   | PTGS2 |
| MAX | hsa-miR-942-5p   | TLR4  |
| MAX | hsa-miR-143-3p   | PTGS2 |
| MAX | hsa-miR-143-3p   | TNF   |
| MAX | hsa-miR-143-3p   | SMAD3 |
| MAX | hsa-miR-18a-5p   | TP53  |
| MAX | hsa-miR-18a-5p   | HIF1A |
| MAX | hsa-miR-18a-5p   | SMAD3 |
| MAX | hsa-miR-4470     | HIF1A |
| MAX | hsa-miR-199a-3p  | PTGS2 |
| MAX | hsa-miR-146b-5p  | NFKB1 |
| MAX | hsa-miR-146b-5p  | TLR4  |
| MAX | hsa-miR-19b-3p   | TGFB1 |
| MAX | hsa-miR-19b-3p   | TP53  |
| MAX | hsa-miR-144-3p   | TGFB1 |
| MAX | hsa-let-7i-5p    | TLR4  |
| MAX | hsa-miR-4487     | HIF1A |
| MAX | hsa-miR-92b-3p   | SMAD3 |
| MAX | hsa-miR-4659b-3p | TLR4  |
| MAX | hsa-miR-124-3p   | IL6   |
| MAX | hsa-miR-124-3p   | PTGS2 |
| MAX | hsa-miR-124-3p   | STAT3 |
| MAX | hsa-miR-106b-5p  | STAT3 |
| MAX | hsa-miR-106b-5p  | HIF1A |
| MAX | hsa-miR-199b-5p  | HIF1A |
| MAX | hsa-miR-18a-3p   | SMAD3 |
| MAX | hsa-miR-10b-5p   | TP53  |
| MAX | hsa-miR-139-5p   | NFKB1 |
| MAX | hsa-miR-4799-5p  | HIF1A |
| MAX | hsa-miR-4282     | HIF1A |
| MAX | hsa-miR-365a-5p  | STAT3 |
| MAX | hsa-miR-33a-5p   | HIF1A |
| MAX | hsa-miR-7-5p     | TLR4  |

|     |                 |       |
|-----|-----------------|-------|
| MAX | hsa-miR-155-5p  | IL6   |
| MAX | hsa-miR-155-5p  | NFKB1 |
| MAX | hsa-miR-155-5p  | SMAD3 |
| MAX | hsa-miR-3128    | HIF1A |
| MAX | hsa-miR-4738-3p | TLR4  |
| MAX | hsa-miR-6871-3p | STAT3 |
| MAX | hsa-miR-93-5p   | TGFB1 |
| MAX | hsa-miR-93-5p   | STAT3 |
| MAX | hsa-miR-93-5p   | HIF1A |
| MAX | hsa-miR-137     | PTGS2 |
| MAX | hsa-miR-337-3p  | STAT3 |
| MAX | hsa-miR-663a    | TGFB1 |
| MAX | hsa-miR-149-3p  | TP53  |
| MAX | hsa-miR-6789-3p | STAT3 |
| MAX | hsa-miR-1322    | HIF1A |
| MAX | hsa-miR-6875-3p | STAT3 |
| MAX | hsa-miR-200a-3p | TP53  |
| MAX | hsa-miR-200a-3p | SMAD3 |
| MAX | hsa-miR-138-5p  | HIF1A |
| MAX | hsa-miR-5197-5p | TP53  |
| MAX | hsa-miR-34b-5p  | HIF1A |
| MAX | hsa-miR-132-3p  | PTGS2 |
| MAX | hsa-miR-9-5p    | NFKB1 |
| MAX | hsa-miR-371b-3p | STAT3 |
| MAX | hsa-miR-1908-5p | PTGS2 |
| MAX | hsa-miR-5193    | TP53  |
| MAX | hsa-miR-935     | HIF1A |
| MAX | hsa-miR-146a-5p | PTGS2 |
| MAX | hsa-miR-146a-5p | TLR4  |
| MAX | hsa-miR-146a-5p | NFKB1 |
| MAX | hsa-miR-6809-3p | STAT3 |
| MAX | hsa-miR-6760-5p | TP53  |
| MAX | hsa-miR-19a-3p  | TNF   |
| MAX | hsa-miR-19a-3p  | TP53  |
| MAX | hsa-miR-2682-5p | HIF1A |
| MAX | hsa-miR-142-3p  | IL6   |

|     |                  |       |
|-----|------------------|-------|
| MAX | hsa-miR-4531     | TP53  |
| MAX | hsa-miR-6815-3p  | HIF1A |
| MAX | hsa-miR-153-5p   | HIF1A |
| MAX | hsa-miR-3074-3p  | HIF1A |
| MAX | hsa-miR-17-5p    | TGFB1 |
| MAX | hsa-miR-17-5p    | PTGS2 |
| MAX | hsa-miR-17-5p    | HIF1A |
| MAX | hsa-miR-17-5p    | SMAD3 |
| MAX | hsa-miR-17-5p    | TP53  |
| MAX | hsa-let-7a-5p    | IL6   |
| MAX | hsa-let-7a-5p    | PTGS2 |
| MAX | hsa-let-7a-5p    | NFKB1 |
| MAX | hsa-miR-6872-3p  | STAT3 |
| MAX | hsa-miR-4279     | TLR4  |
| MAX | hsa-miR-1181     | STAT3 |
| MAX | hsa-miR-4441     | STAT3 |
| MAX | hsa-miR-149-5p   | IL6   |
| MAX | hsa-miR-138-2-3p | STAT3 |
| MAX | hsa-miR-130a-3p  | TGFB1 |
| MAX | hsa-miR-130a-3p  | TNF   |
| MAX | hsa-miR-195-5p   | SMAD3 |
| MAX | hsa-miR-3165     | TP53  |
| MAX | hsa-miR-24-3p    | TGFB1 |
| MAX | hsa-miR-4659a-3p | TLR4  |
| MAX | hsa-miR-223-3p   | IL6   |
| MAX | hsa-miR-223-3p   | TP53  |
| MAX | hsa-miR-21-5p    | TGFB1 |
| MAX | hsa-miR-21-5p    | TLR4  |
| MAX | hsa-miR-21-5p    | HIF1A |
| MAX | hsa-miR-21-5p    | NFKB1 |
| MAX | hsa-miR-211-5p   | TGFB1 |
| MAX | hsa-miR-199a-5p  | PTGS2 |
| MAX | hsa-miR-199a-5p  | HIF1A |
| MAX | hsa-miR-199a-5p  | NFKB1 |
| MAX | hsa-miR-145-5p   | SMAD3 |
| MAX | hsa-miR-449c-5p  | HIF1A |

|     |                 |       |
|-----|-----------------|-------|
| MAX | hsa-miR-128-3p  | PTGS2 |
| MAX | hsa-miR-20a-5p  | TP53  |
| MAX | hsa-miR-20a-5p  | HIF1A |
| MAX | hsa-miR-106b-3p | HIF1A |
| MAZ | hsa-miR-139-5p  | NFKB1 |
| MAZ | hsa-miR-150-5p  | TP53  |
| MAZ | hsa-miR-379-3p  | PTGS2 |
| MAZ | hsa-miR-5094    | HIF1A |
| MAZ | hsa-miR-130b-3p | STAT3 |
| MAZ | hsa-miR-365a-5p | STAT3 |
| MAZ | hsa-miR-100-5p  | PTGS2 |
| MAZ | hsa-miR-146a-5p | PTGS2 |
| MAZ | hsa-miR-146a-5p | NFKB1 |
| MAZ | hsa-miR-6809-3p | STAT3 |
| MAZ | hsa-miR-143-3p  | PTGS2 |
| MAZ | hsa-miR-143-3p  | TNF   |
| MAZ | hsa-miR-143-3p  | SMAD3 |
| MAZ | hsa-miR-6806-5p | HIF1A |
| MAZ | hsa-miR-22-3p   | HIF1A |
| MAZ | hsa-miR-365a-3p | IL6   |
| MAZ | hsa-miR-130a-3p | TGFB1 |
| MAZ | hsa-miR-130a-3p | TNF   |
| MAZ | hsa-miR-199a-3p | PTGS2 |
| MAZ | hsa-miR-26a-5p  | IL6   |
| MAZ | hsa-miR-200a-3p | TP53  |
| MAZ | hsa-miR-200a-3p | SMAD3 |
| MAZ | hsa-miR-3128    | HIF1A |
| MAZ | hsa-miR-146b-5p | NFKB1 |
| MAZ | hsa-miR-21-5p   | TGFB1 |
| MAZ | hsa-miR-21-5p   | HIF1A |
| MAZ | hsa-miR-21-5p   | NFKB1 |
| MAZ | hsa-miR-199a-5p | PTGS2 |
| MAZ | hsa-miR-199a-5p | HIF1A |
| MAZ | hsa-miR-199a-5p | NFKB1 |
| MAZ | hsa-miR-9-5p    | NFKB1 |
| MAZ | hsa-miR-142-3p  | IL6   |

|       |                 |       |
|-------|-----------------|-------|
| MAZ   | hsa-miR-449c-5p | HIF1A |
| MAZ   | hsa-let-7a-5p   | IL6   |
| MAZ   | hsa-let-7a-5p   | PTGS2 |
| MAZ   | hsa-let-7a-5p   | NFKB1 |
| MAZ   | hsa-miR-144-3p  | TGFB1 |
| MAZ   | hsa-let-7b-5p   | PTGS2 |
| MAZ   | hsa-let-7b-5p   | HIF1A |
| MAZ   | hsa-miR-195-5p  | SMAD3 |
| MAZ   | hsa-miR-1322    | HIF1A |
| MAZ   | hsa-miR-4271    | TP53  |
| MAZ   | hsa-miR-4487    | HIF1A |
| MAZ   | hsa-miR-6875-3p | STAT3 |
| MAZ   | hsa-miR-3662    | HIF1A |
| MAZ   | hsa-miR-138-5p  | HIF1A |
| MAZ   | hsa-miR-199b-5p | HIF1A |
| MAZ   | hsa-miR-4441    | STAT3 |
| MAZ   | hsa-miR-633     | TGFB1 |
| MAZ   | hsa-miR-320a    | PTGS2 |
| MBD3  | hsa-miR-125a-5p | TP53  |
| MBD3  | hsa-miR-130b-3p | STAT3 |
| MBD3  | hsa-miR-143-3p  | PTGS2 |
| MBD3  | hsa-miR-143-3p  | TNF   |
| MBD3  | hsa-miR-143-3p  | SMAD3 |
| MBD3  | hsa-miR-6722-3p | TP53  |
| MBD3  | hsa-miR-3165    | TP53  |
| MBD3  | hsa-miR-6871-3p | STAT3 |
| MBD3  | hsa-miR-337-3p  | STAT3 |
| MBD3  | hsa-miR-3658    | TLR4  |
| MBD3  | hsa-miR-4279    | TLR4  |
| MBD3  | hsa-miR-181c-5p | IL2   |
| MBD3  | hsa-miR-4694-3p | TLR4  |
| MBD4  | hsa-miR-145-5p  | SMAD3 |
| MECOM | hsa-miR-18a-5p  | TP53  |
| MECOM | hsa-miR-18a-5p  | HIF1A |
| MECOM | hsa-miR-18a-5p  | SMAD3 |
| MECOM | hsa-miR-19b-3p  | TGFB1 |



|       |                  |       |
|-------|------------------|-------|
| MECOM | hsa-miR-19b-3p   | TP53  |
| MECOM | hsa-miR-17-5p    | PTGS2 |
| MECOM | hsa-miR-17-5p    | TGFB1 |
| MECOM | hsa-miR-17-5p    | HIF1A |
| MECOM | hsa-miR-17-5p    | SMAD3 |
| MECOM | hsa-miR-17-5p    | TP53  |
| MECOM | hsa-miR-20a-5p   | TP53  |
| MECOM | hsa-miR-20a-5p   | HIF1A |
| MECOM | hsa-miR-92a-1-5p | TP53  |
| MECOM | hsa-miR-18a-3p   | SMAD3 |
| MECOM | hsa-miR-19a-3p   | TP53  |
| MECOM | hsa-miR-5702     | TP53  |
| MEF2A | hsa-miR-18a-5p   | HIF1A |
| MEF2A | hsa-miR-5094     | HIF1A |
| MEF2A | hsa-miR-365a-5p  | STAT3 |
| MEF2A | hsa-miR-17-5p    | TGFB1 |
| MEF2A | hsa-miR-17-5p    | HIF1A |
| MEF2A | hsa-miR-663a     | TGFB1 |
| MEF2A | hsa-miR-3662     | HIF1A |
| MEF2A | hsa-miR-20a-5p   | HIF1A |
| MEF2C | hsa-miR-142-3p   | IL6   |
| MITF  | hsa-miR-3934-5p  | PTGS2 |
| MITF  | hsa-miR-146a-5p  | PTGS2 |
| MITF  | hsa-miR-146a-5p  | NFKB1 |
| MITF  | hsa-miR-874-3p   | STAT3 |
| MITF  | hsa-miR-3074-3p  | HIF1A |
| MITF  | hsa-miR-296-3p   | PTGS2 |
| MITF  | hsa-let-7a-5p    | PTGS2 |
| MITF  | hsa-let-7a-5p    | NFKB1 |
| MITF  | hsa-miR-30d-5p   | TP53  |
| MITF  | hsa-let-7b-5p    | PTGS2 |
| MITF  | hsa-let-7b-5p    | HIF1A |
| MITF  | hsa-miR-128-3p   | PTGS2 |
| MITF  | hsa-miR-6875-3p  | STAT3 |
| MITF  | hsa-miR-922      | STAT3 |
| MITF  | hsa-miR-4441     | STAT3 |

|      |                 |       |
|------|-----------------|-------|
| MNT  | hsa-miR-18a-5p  | TP53  |
| MNT  | hsa-miR-18a-5p  | HIF1A |
| MNT  | hsa-miR-18a-5p  | SMAD3 |
| MNT  | hsa-miR-22-3p   | HIF1A |
| MNT  | hsa-miR-130b-3p | STAT3 |
| MNT  | hsa-miR-6872-3p | STAT3 |
| MNT  | hsa-miR-18a-3p  | SMAD3 |
| MNT  | hsa-miR-19a-3p  | TP53  |
| MTA3 | hsa-miR-625-3p  | HIF1A |
| MTA3 | hsa-miR-106b-5p | STAT3 |
| MTA3 | hsa-miR-106b-5p | HIF1A |
| MTA3 | hsa-miR-93-5p   | STAT3 |
| MTA3 | hsa-miR-93-5p   | HIF1A |
| MTA3 | hsa-miR-21-5p   | NFKB1 |
| MTA3 | hsa-miR-21-5p   | HIF1A |
| MTA3 | hsa-miR-6807-3p | HIF1A |
| MTA3 | hsa-miR-6807-5p | STAT3 |
| MTA3 | hsa-miR-3662    | HIF1A |
| MTA3 | hsa-miR-6871-3p | STAT3 |
| MTA3 | hsa-miR-106b-3p | HIF1A |
| MXD1 | hsa-miR-15b-5p  | SMAD3 |
| MXD1 | hsa-miR-16-5p   | TP53  |
| MXD1 | hsa-miR-16-5p   | SMAD3 |
| MXI1 | hsa-miR-132-3p  | PTGS2 |
| MXI1 | hsa-miR-210-3p  | NFKB1 |
| MXI1 | hsa-miR-210-3p  | HIF1A |
| MXI1 | hsa-miR-1908-5p | PTGS2 |
| MXI1 | hsa-miR-6809-3p | STAT3 |
| MXI1 | hsa-miR-130a-3p | TGFB1 |
| MXI1 | hsa-miR-130a-3p | TNF   |
| MXI1 | hsa-miR-199a-5p | PTGS2 |
| MXI1 | hsa-miR-199a-5p | HIF1A |
| MXI1 | hsa-miR-199a-5p | NFKB1 |
| MXI1 | hsa-miR-199b-5p | HIF1A |
| MXI1 | hsa-miR-7-5p    | TLR4  |
| MXI1 | hsa-miR-22-3p   | HIF1A |

|      |                  |       |
|------|------------------|-------|
| MXI1 | hsa-miR-5197-5p  | TP53  |
| MXI1 | hsa-miR-4470     | HIF1A |
| MXI1 | hsa-miR-935      | HIF1A |
| MXI1 | hsa-miR-19a-3p   | TNF   |
| MXI1 | hsa-miR-19a-3p   | TP53  |
| MXI1 | hsa-miR-30b-5p   | TP53  |
| MXI1 | hsa-miR-4738-3p  | TLR4  |
| MXI1 | hsa-miR-142-3p   | IL6   |
| MXI1 | hsa-miR-92a-3p   | NFKB1 |
| MXI1 | hsa-miR-223-3p   | IL6   |
| MXI1 | hsa-miR-223-3p   | TP53  |
| MXI1 | hsa-miR-6815-3p  | HIF1A |
| MXI1 | hsa-miR-19b-3p   | TGFB1 |
| MXI1 | hsa-miR-19b-3p   | TP53  |
| MXI1 | hsa-miR-145-5p   | SMAD3 |
| MXI1 | hsa-miR-449c-5p  | HIF1A |
| MXI1 | hsa-miR-199a-3p  | PTGS2 |
| MXI1 | hsa-let-7a-5p    | IL6   |
| MXI1 | hsa-let-7a-5p    | PTGS2 |
| MXI1 | hsa-let-7a-5p    | NFKB1 |
| MXI1 | hsa-miR-203a-3p  | IL6   |
| MXI1 | hsa-miR-203a-3p  | TNF   |
| MXI1 | hsa-miR-128-3p   | PTGS2 |
| MXI1 | hsa-miR-1322     | HIF1A |
| MXI1 | hsa-miR-4441     | STAT3 |
| MXI1 | hsa-miR-4659a-3p | TLR4  |
| MXI1 | hsa-miR-92b-3p   | SMAD3 |
| MXI1 | hsa-miR-124-3p   | IL6   |
| MXI1 | hsa-miR-124-3p   | PTGS2 |
| MXI1 | hsa-miR-124-3p   | STAT3 |
| MXI1 | hsa-miR-138-5p   | HIF1A |
| MXI1 | hsa-miR-4279     | TLR4  |
| MXI1 | hsa-miR-92a-1-5p | TP53  |
| MXI1 | hsa-miR-1181     | STAT3 |
| MXI1 | hsa-miR-130b-3p  | STAT3 |
| MXI1 | hsa-miR-320a     | PTGS2 |

|       |                  |       |
|-------|------------------|-------|
| MYB   | hsa-let-7b-5p    | HIF1A |
| MYBL2 | hsa-miR-618      | STAT3 |
| MYBL2 | hsa-miR-5197-5p  | TP53  |
| MYBL2 | hsa-miR-935      | HIF1A |
| MYC   | hsa-miR-3934-5p  | PTGS2 |
| MYC   | hsa-miR-203a-3p  | IL6   |
| MYC   | hsa-miR-203a-3p  | TNF   |
| MYC   | hsa-miR-210-3p   | NFKB1 |
| MYC   | hsa-miR-210-3p   | HIF1A |
| MYC   | hsa-miR-365a-3p  | IL6   |
| MYC   | hsa-miR-379-3p   | PTGS2 |
| MYC   | hsa-miR-5094     | HIF1A |
| MYC   | hsa-miR-130b-3p  | STAT3 |
| MYC   | hsa-miR-877-3p   | STAT3 |
| MYC   | hsa-miR-942-5p   | TLR4  |
| MYC   | hsa-miR-143-3p   | PTGS2 |
| MYC   | hsa-miR-143-3p   | TNF   |
| MYC   | hsa-miR-143-3p   | SMAD3 |
| MYC   | hsa-miR-214-3p   | TP53  |
| MYC   | hsa-miR-149-3p   | TP53  |
| MYC   | hsa-miR-22-3p    | HIF1A |
| MYC   | hsa-miR-4470     | HIF1A |
| MYC   | hsa-miR-150-5p   | TP53  |
| MYC   | hsa-miR-4418     | HIF1A |
| MYC   | hsa-miR-199a-3p  | PTGS2 |
| MYC   | hsa-miR-144-3p   | TGFB1 |
| MYC   | hsa-miR-4487     | HIF1A |
| MYC   | hsa-miR-4659b-3p | TLR4  |
| MYC   | hsa-miR-124-3p   | IL6   |
| MYC   | hsa-miR-124-3p   | PTGS2 |
| MYC   | hsa-miR-124-3p   | STAT3 |
| MYC   | hsa-miR-1234-3p  | STAT3 |
| MYC   | hsa-miR-138-5p   | HIF1A |
| MYC   | hsa-miR-199b-5p  | HIF1A |
| MYC   | hsa-miR-18a-3p   | SMAD3 |
| MYC   | hsa-miR-4279     | TLR4  |

|     |                 |       |
|-----|-----------------|-------|
| MYC | hsa-miR-139-5p  | NFKB1 |
| MYC | hsa-miR-4799-5p | HIF1A |
| MYC | hsa-miR-4685-5p | STAT3 |
| MYC | hsa-miR-365a-5p | STAT3 |
| MYC | hsa-miR-4286    | TP53  |
| MYC | hsa-miR-211-5p  | TGFB1 |
| MYC | hsa-miR-199a-5p | PTGS2 |
| MYC | hsa-miR-199a-5p | HIF1A |
| MYC | hsa-miR-199a-5p | NFKB1 |
| MYC | hsa-miR-146b-5p | NFKB1 |
| MYC | hsa-miR-146b-5p | TLR4  |
| MYC | hsa-miR-3128    | HIF1A |
| MYC | hsa-miR-4738-3p | TLR4  |
| MYC | hsa-miR-6871-3p | STAT3 |
| MYC | hsa-miR-5702    | TP53  |
| MYC | hsa-miR-19b-3p  | TGFB1 |
| MYC | hsa-miR-19b-3p  | TP53  |
| MYC | hsa-miR-663a    | TGFB1 |
| MYC | hsa-miR-589-5p  | PTGS2 |
| MYC | hsa-miR-6789-3p | STAT3 |
| MYC | hsa-miR-1322    | HIF1A |
| MYC | hsa-miR-6875-3p | STAT3 |
| MYC | hsa-miR-329-5p  | HIF1A |
| MYC | hsa-miR-4748    | HIF1A |
| MYC | hsa-miR-18a-5p  | TP53  |
| MYC | hsa-miR-18a-5p  | HIF1A |
| MYC | hsa-miR-18a-5p  | SMAD3 |
| MYC | hsa-miR-9-5p    | NFKB1 |
| MYC | hsa-miR-625-3p  | HIF1A |
| MYC | hsa-miR-371b-3p | STAT3 |
| MYC | hsa-miR-1908-5p | PTGS2 |
| MYC | hsa-miR-5193    | TP53  |
| MYC | hsa-miR-6809-3p | STAT3 |
| MYC | hsa-miR-6760-5p | TP53  |
| MYC | hsa-miR-935     | HIF1A |
| MYC | hsa-miR-142-3p  | IL6   |

|       |                  |       |
|-------|------------------|-------|
| MYC   | hsa-miR-4531     | TP53  |
| MYC   | hsa-miR-132-3p   | PTGS2 |
| MYC   | hsa-miR-6815-3p  | HIF1A |
| MYC   | hsa-miR-30e-5p   | TP53  |
| MYC   | hsa-miR-6872-3p  | STAT3 |
| MYC   | hsa-miR-4735-3p  | HIF1A |
| MYC   | hsa-miR-138-2-3p | STAT3 |
| MYC   | hsa-miR-4282     | HIF1A |
| MYC   | hsa-miR-922      | STAT3 |
| MYC   | hsa-miR-1181     | STAT3 |
| MYC   | hsa-miR-4441     | STAT3 |
| MYC   | hsa-miR-424-5p   | HIF1A |
| MYC   | hsa-miR-149-5p   | IL6   |
| MYC   | hsa-miR-130a-3p  | TGFB1 |
| MYC   | hsa-miR-130a-3p  | TNF   |
| MYC   | hsa-miR-193b-3p  | SMAD3 |
| MYC   | hsa-miR-3165     | TP53  |
| MYC   | hsa-miR-4659a-3p | TLR4  |
| MYC   | hsa-miR-223-3p   | IL6   |
| MYC   | hsa-miR-223-3p   | TP53  |
| MYC   | hsa-miR-509-5p   | HIF1A |
| MYC   | hsa-miR-4438     | STAT3 |
| MYC   | hsa-miR-128-3p   | PTGS2 |
| MYC   | hsa-miR-3609     | HIF1A |
| MYC   | hsa-miR-106b-3p  | HIF1A |
| MYC   | hsa-miR-299-5p   | HIF1A |
| MYOD1 | hsa-miR-26a-5p   | IL6   |
| MYOD1 | hsa-miR-149-5p   | IL6   |
| MYOD1 | hsa-miR-5193     | TP53  |
| MYOD1 | hsa-miR-4282     | HIF1A |
| MYOD1 | hsa-miR-33a-5p   | HIF1A |
| MYOD1 | hsa-miR-6809-3p  | STAT3 |
| MYOD1 | hsa-miR-149-3p   | TP53  |
| MYOD1 | hsa-miR-5681a    | STAT3 |
| MYOD1 | hsa-miR-3165     | TP53  |
| MYOD1 | hsa-miR-106b-5p  | STAT3 |

|       |                 |       |
|-------|-----------------|-------|
| MYOD1 | hsa-miR-106b-5p | HIF1A |
| MYOD1 | hsa-miR-30b-5p  | TP53  |
| MYOD1 | hsa-miR-6871-3p | STAT3 |
| MYOD1 | hsa-miR-93-5p   | STAT3 |
| MYOD1 | hsa-miR-93-5p   | HIF1A |
| MYOD1 | hsa-miR-4531    | TP53  |
| MYOD1 | hsa-miR-199a-5p | NFKB1 |
| MYOD1 | hsa-miR-199a-5p | HIF1A |
| MYOD1 | hsa-miR-3160-3p | HIF1A |
| MYOD1 | hsa-miR-3074-3p | HIF1A |
| MYOD1 | hsa-miR-4748    | HIF1A |
| MYOD1 | hsa-miR-8055    | HIF1A |
| MYOD1 | hsa-miR-605-5p  | TP53  |
| MYOD1 | hsa-let-7b-5p   | HIF1A |
| MYOD1 | hsa-miR-5681b   | HIF1A |
| MYOD1 | hsa-miR-106b-3p | HIF1A |
| MYOD1 | hsa-miR-4270    | STAT3 |
| MYOD1 | hsa-miR-138-5p  | HIF1A |
| MZF1  | hsa-miR-18a-5p  | HIF1A |
| MZF1  | hsa-miR-18a-5p  | SMAD3 |
| MZF1  | hsa-miR-145-5p  | SMAD3 |
| MZF1  | hsa-miR-17-5p   | HIF1A |
| MZF1  | hsa-miR-17-5p   | SMAD3 |
| MZF1  | hsa-miR-18a-3p  | SMAD3 |
| NANOG | hsa-miR-9-5p    | NFKB1 |
| NANOG | hsa-miR-10b-5p  | TP53  |
| NANOG | hsa-miR-146a-5p | PTGS2 |
| NANOG | hsa-miR-146a-5p | NFKB1 |
| NANOG | hsa-miR-33a-5p  | HIF1A |
| NANOG | hsa-miR-199b-5p | HIF1A |
| NANOG | hsa-miR-22-3p   | HIF1A |
| NANOG | hsa-miR-193b-3p | SMAD3 |
| NANOG | hsa-miR-519d-3p | STAT3 |
| NANOG | hsa-miR-519d-3p | HIF1A |
| NANOG | hsa-miR-2682-5p | HIF1A |
| NANOG | hsa-miR-5702    | TP53  |

|       |                 |       |
|-------|-----------------|-------|
| NANOG | hsa-miR-21-5p   | NFKB1 |
| NANOG | hsa-miR-21-5p   | HIF1A |
| NANOG | hsa-miR-6815-3p | HIF1A |
| NANOG | hsa-miR-137     | PTGS2 |
| NANOG | hsa-miR-449c-5p | HIF1A |
| NANOG | hsa-miR-7151-3p | STAT3 |
| NANOG | hsa-miR-203a-3p | IL6   |
| NANOG | hsa-miR-618     | STAT3 |
| NANOG | hsa-miR-4487    | HIF1A |
| NANOG | hsa-miR-124-3p  | IL6   |
| NANOG | hsa-miR-124-3p  | PTGS2 |
| NANOG | hsa-miR-124-3p  | STAT3 |
| NANOG | hsa-miR-329-5p  | HIF1A |
| NANOG | hsa-miR-34b-5p  | HIF1A |
| NANOG | hsa-miR-424-5p  | HIF1A |
| NANOG | hsa-miR-7158-5p | STAT3 |
| NCOR1 | hsa-miR-18a-5p  | TP53  |
| NCOR1 | hsa-miR-18a-5p  | HIF1A |
| NCOR1 | hsa-miR-2682-5p | HIF1A |
| NCOR1 | hsa-miR-150-5p  | TP53  |
| NCOR1 | hsa-miR-1908-5p | PTGS2 |
| NCOR1 | hsa-miR-130b-3p | STAT3 |
| NCOR1 | hsa-let-7e-5p   | STAT3 |
| NCOR1 | hsa-miR-6806-5p | HIF1A |
| NCOR1 | hsa-miR-7-5p    | TLR4  |
| NCOR1 | hsa-miR-4470    | HIF1A |
| NCOR1 | hsa-miR-19a-3p  | TP53  |
| NCOR1 | hsa-miR-622     | TP53  |
| NCOR1 | hsa-miR-1296-3p | TP53  |
| NCOR1 | hsa-miR-4738-3p | TLR4  |
| NCOR1 | hsa-miR-142-3p  | IL6   |
| NCOR1 | hsa-miR-132-3p  | PTGS2 |
| NCOR1 | hsa-miR-223-3p  | IL6   |
| NCOR1 | hsa-miR-223-3p  | TP53  |
| NCOR1 | hsa-miR-21-5p   | TGFB1 |
| NCOR1 | hsa-miR-21-5p   | TLR4  |



|        |                 |       |
|--------|-----------------|-------|
| NCOR1  | hsa-miR-21-5p   | HIF1A |
| NCOR1  | hsa-miR-21-5p   | NFKB1 |
| NCOR1  | hsa-miR-137     | PTGS2 |
| NCOR1  | hsa-miR-663a    | TGFB1 |
| NCOR1  | hsa-miR-296-3p  | PTGS2 |
| NCOR1  | hsa-let-7a-5p   | IL6   |
| NCOR1  | hsa-let-7a-5p   | PTGS2 |
| NCOR1  | hsa-let-7a-5p   | NFKB1 |
| NCOR1  | hsa-miR-144-3p  | TGFB1 |
| NCOR1  | hsa-miR-9-5p    | NFKB1 |
| NCOR1  | hsa-miR-3658    | TLR4  |
| NCOR1  | hsa-miR-20a-5p  | TP53  |
| NCOR1  | hsa-miR-20a-5p  | HIF1A |
| NCOR1  | hsa-miR-1181    | STAT3 |
| NCOR1  | hsa-miR-199b-5p | HIF1A |
| NCOR1  | hsa-miR-101-3p  | PTGS2 |
| NCOR1  | hsa-miR-6872-3p | STAT3 |
| NFAT5  | hsa-miR-6807-5p | STAT3 |
| NFAT5  | hsa-miR-6807-3p | HIF1A |
| NFAT5  | hsa-miR-106b-3p | HIF1A |
| NFAT5  | hsa-let-7b-5p   | PTGS2 |
| NFAT5  | hsa-let-7b-5p   | HIF1A |
| NFAT5  | hsa-miR-22-3p   | HIF1A |
| NFATC1 | hsa-miR-663a    | TGFB1 |
| NFATC1 | hsa-miR-146a-5p | NFKB1 |
| NFATC1 | hsa-miR-29b-3p  | TGFB1 |
| NFATC1 | hsa-miR-3662    | HIF1A |
| NFATC1 | hsa-miR-6872-3p | STAT3 |
| NFATC1 | hsa-miR-107     | HIF1A |
| NFE2   | hsa-miR-889-3p  | HIF1A |
| NFE2   | hsa-miR-33a-5p  | HIF1A |
| NFE2   | hsa-miR-6809-3p | STAT3 |
| NFE2   | hsa-miR-143-3p  | PTGS2 |
| NFE2   | hsa-miR-143-3p  | SMAD3 |
| NFE2   | hsa-miR-214-3p  | TP53  |
| NFE2   | hsa-miR-935     | HIF1A |

|        |                  |       |
|--------|------------------|-------|
| NFE2   | hsa-miR-4531     | TP53  |
| NFE2   | hsa-miR-6815-3p  | HIF1A |
| NFE2   | hsa-miR-663a     | TGFB1 |
| NFE2   | hsa-miR-6760-5p  | TP53  |
| NFE2   | hsa-miR-589-5p   | PTGS2 |
| NFE2   | hsa-miR-144-3p   | TGFB1 |
| NFE2   | hsa-miR-1322     | HIF1A |
| NFE2   | hsa-miR-4271     | TP53  |
| NFE2   | hsa-miR-4487     | HIF1A |
| NFE2   | hsa-miR-4659b-3p | TLR4  |
| NFE2   | hsa-miR-124-3p   | PTGS2 |
| NFE2   | hsa-miR-124-3p   | STAT3 |
| NFE2   | hsa-miR-138-5p   | HIF1A |
| NFE2   | hsa-miR-199b-5p  | HIF1A |
| NFE2   | hsa-miR-101-3p   | PTGS2 |
| NFE2L2 | hsa-miR-106b-5p  | STAT3 |
| NFE2L2 | hsa-miR-622      | TP53  |
| NFE2L2 | hsa-miR-365a-5p  | STAT3 |
| NFE2L2 | hsa-miR-93-5p    | STAT3 |
| NFE2L2 | hsa-let-7b-5p    | PTGS2 |
| NFIC   | hsa-miR-3934-5p  | PTGS2 |
| NFIC   | hsa-miR-625-3p   | HIF1A |
| NFIC   | hsa-miR-199a-3p  | PTGS2 |
| NFIC   | hsa-miR-5094     | HIF1A |
| NFIC   | hsa-miR-4282     | HIF1A |
| NFIC   | hsa-let-7a-5p    | PTGS2 |
| NFIC   | hsa-let-7a-5p    | NFKB1 |
| NFIC   | hsa-miR-365a-5p  | STAT3 |
| NFIC   | hsa-miR-6133     | TP53  |
| NFIC   | hsa-let-7e-5p    | STAT3 |
| NFIC   | hsa-miR-199a-5p  | PTGS2 |
| NFIC   | hsa-miR-199a-5p  | HIF1A |
| NFIC   | hsa-miR-199a-5p  | NFKB1 |
| NFIC   | hsa-miR-24-3p    | TGFB1 |
| NFIC   | hsa-miR-22-3p    | HIF1A |
| NFIC   | hsa-miR-5197-5p  | TP53  |

|      |                 |       |
|------|-----------------|-------|
| NFIC | hsa-miR-193b-3p | SMAD3 |
| NFIC | hsa-miR-4470    | HIF1A |
| NFIC | hsa-miR-3165    | TP53  |
| NFIC | hsa-miR-5702    | TP53  |
| NFIC | hsa-let-7i-5p   | TLR4  |
| NFIC | hsa-miR-21-5p   | TGFB1 |
| NFIC | hsa-miR-21-5p   | TLR4  |
| NFIC | hsa-miR-21-5p   | HIF1A |
| NFIC | hsa-miR-21-5p   | NFKB1 |
| NFIC | hsa-miR-145-5p  | SMAD3 |
| NFIC | hsa-miR-5193    | TP53  |
| NFIC | hsa-miR-30e-5p  | TP53  |
| NFIC | hsa-miR-6871-3p | STAT3 |
| NFIC | hsa-miR-663a    | TGFB1 |
| NFIC | hsa-miR-203a-3p | TNF   |
| NFIC | hsa-miR-9-5p    | NFKB1 |
| NFIC | hsa-miR-618     | STAT3 |
| NFIC | hsa-miR-4487    | HIF1A |
| NFIC | hsa-miR-7-5p    | TLR4  |
| NFIC | hsa-miR-146b-5p | NFKB1 |
| NFIC | hsa-miR-146b-5p | TLR4  |
| NFIC | hsa-miR-4279    | TLR4  |
| NFIC | hsa-miR-3662    | HIF1A |
| NFIC | hsa-miR-155-5p  | NFKB1 |
| NFIC | hsa-miR-155-5p  | SMAD3 |
| NFIC | hsa-miR-128-3p  | PTGS2 |
| NFIC | hsa-miR-320a    | PTGS2 |
| NFYA | hsa-miR-18a-5p  | HIF1A |
| NFYA | hsa-miR-1181    | STAT3 |
| NFYA | hsa-miR-17-5p   | PTGS2 |
| NFYA | hsa-miR-17-5p   | HIF1A |
| NFYB | hsa-let-7i-5p   | TLR4  |
| NFYB | hsa-miR-21-5p   | TLR4  |
| NFYB | hsa-miR-21-5p   | HIF1A |
| NFYB | hsa-miR-3662    | HIF1A |
| NFYB | hsa-miR-150-5p  | TP53  |

|        |                 |       |
|--------|-----------------|-------|
| NFYB   | hsa-miR-5193    | TP53  |
| NFYB   | hsa-miR-940     | HIF1A |
| NKX2-1 | hsa-miR-1178-3p | STAT3 |
| NKX2-1 | hsa-miR-3165    | TP53  |
| NKX2-1 | hsa-miR-4799-5p | HIF1A |
| NKX2-1 | hsa-miR-5197-5p | TP53  |
| NKX2-1 | hsa-miR-5702    | TP53  |
| NKX2-1 | hsa-miR-21-5p   | NFKB1 |
| NKX2-1 | hsa-miR-21-5p   | HIF1A |
| NKX2-1 | hsa-miR-137     | PTGS2 |
| NKX2-1 | hsa-miR-92b-3p  | SMAD3 |
| NKX2-1 | hsa-miR-6875-3p | STAT3 |
| NKX2-2 | hsa-miR-18a-5p  | TP53  |
| NKX2-2 | hsa-miR-18a-5p  | HIF1A |
| NKX2-2 | hsa-miR-18a-5p  | SMAD3 |
| NKX2-2 | hsa-miR-4470    | HIF1A |
| NKX2-2 | hsa-miR-17-5p   | PTGS2 |
| NKX2-2 | hsa-miR-17-5p   | TP53  |
| NKX2-2 | hsa-miR-17-5p   | HIF1A |
| NKX2-2 | hsa-miR-17-5p   | SMAD3 |
| NKX2-2 | hsa-let-7a-5p   | PTGS2 |
| NKX2-2 | hsa-miR-18a-3p  | SMAD3 |
| NR2F2  | hsa-miR-1178-3p | STAT3 |
| NR2F2  | hsa-miR-3934-5p | PTGS2 |
| NR2F2  | hsa-miR-210-3p  | NFKB1 |
| NR2F2  | hsa-miR-210-3p  | HIF1A |
| NR2F2  | hsa-miR-125a-5p | TP53  |
| NR2F2  | hsa-miR-877-3p  | STAT3 |
| NR2F2  | hsa-miR-33a-5p  | HIF1A |
| NR2F2  | hsa-miR-149-3p  | TP53  |
| NR2F2  | hsa-miR-296-3p  | PTGS2 |
| NR2F2  | hsa-miR-22-3p   | HIF1A |
| NR2F2  | hsa-miR-622     | TP53  |
| NR2F2  | hsa-miR-4470    | HIF1A |
| NR2F2  | hsa-miR-26b-5p  | NFKB1 |
| NR2F2  | hsa-miR-26b-5p  | PTGS2 |

|       |                  |       |
|-------|------------------|-------|
| NR2F2 | hsa-miR-199a-3p  | PTGS2 |
| NR2F2 | hsa-miR-6871-3p  | STAT3 |
| NR2F2 | hsa-miR-4487     | HIF1A |
| NR2F2 | hsa-miR-7113-5p  | STAT3 |
| NR2F2 | hsa-miR-130b-3p  | STAT3 |
| NR2F2 | hsa-miR-106b-5p  | STAT3 |
| NR2F2 | hsa-miR-106b-5p  | HIF1A |
| NR2F2 | hsa-miR-124-3p   | IL6   |
| NR2F2 | hsa-miR-124-3p   | PTGS2 |
| NR2F2 | hsa-miR-124-3p   | STAT3 |
| NR2F2 | hsa-miR-199b-5p  | HIF1A |
| NR2F2 | hsa-miR-7110-3p  | STAT3 |
| NR2F2 | hsa-miR-365a-5p  | STAT3 |
| NR2F2 | hsa-miR-6754-5p  | STAT3 |
| NR2F2 | hsa-miR-1181     | STAT3 |
| NR2F2 | hsa-miR-146b-5p  | NFKB1 |
| NR2F2 | hsa-miR-26a-5p   | IL6   |
| NR2F2 | hsa-miR-4499     | HIF1A |
| NR2F2 | hsa-miR-6511a-5p | HIF1A |
| NR2F2 | hsa-miR-324-3p   | TGFB1 |
| NR2F2 | hsa-miR-93-5p    | TGFB1 |
| NR2F2 | hsa-miR-93-5p    | STAT3 |
| NR2F2 | hsa-miR-93-5p    | HIF1A |
| NR2F2 | hsa-miR-8071     | TP53  |
| NR2F2 | hsa-miR-337-3p   | STAT3 |
| NR2F2 | hsa-miR-6760-5p  | TP53  |
| NR2F2 | hsa-miR-589-5p   | PTGS2 |
| NR2F2 | hsa-miR-940      | HIF1A |
| NR2F2 | hsa-miR-6875-3p  | STAT3 |
| NR2F2 | hsa-miR-5197-5p  | TP53  |
| NR2F2 | hsa-miR-320a     | PTGS2 |
| NR2F2 | hsa-miR-132-3p   | PTGS2 |
| NR2F2 | hsa-miR-9-5p     | NFKB1 |
| NR2F2 | hsa-miR-625-3p   | HIF1A |
| NR2F2 | hsa-miR-5193     | TP53  |
| NR2F2 | hsa-miR-6809-3p  | STAT3 |

|       |                 |       |
|-------|-----------------|-------|
| NR2F2 | hsa-miR-6806-5p | HIF1A |
| NR2F2 | hsa-miR-365a-3p | IL6   |
| NR2F2 | hsa-miR-454-3p  | TP53  |
| NR2F2 | hsa-miR-142-3p  | IL6   |
| NR2F2 | hsa-miR-4531    | TP53  |
| NR2F2 | hsa-miR-6815-3p | HIF1A |
| NR2F2 | hsa-miR-3074-3p | HIF1A |
| NR2F2 | hsa-miR-17-5p   | TGFB1 |
| NR2F2 | hsa-miR-17-5p   | PTGS2 |
| NR2F2 | hsa-miR-17-5p   | HIF1A |
| NR2F2 | hsa-miR-17-5p   | SMAD3 |
| NR2F2 | hsa-miR-17-5p   | TP53  |
| NR2F2 | hsa-let-7a-5p   | IL6   |
| NR2F2 | hsa-let-7a-5p   | PTGS2 |
| NR2F2 | hsa-let-7a-5p   | NFKB1 |
| NR2F2 | hsa-miR-6872-3p | STAT3 |
| NR2F2 | hsa-miR-922     | STAT3 |
| NR2F2 | hsa-miR-608     | TP53  |
| NR2F2 | hsa-miR-4441    | STAT3 |
| NR2F2 | hsa-miR-424-5p  | HIF1A |
| NR2F2 | hsa-miR-149-5p  | IL6   |
| NR2F2 | hsa-miR-1-3p    | IL6   |
| NR2F2 | hsa-miR-494-3p  | HIF1A |
| NR2F2 | hsa-miR-1234-3p | STAT3 |
| NR2F2 | hsa-let-7e-5p   | STAT3 |
| NR2F2 | hsa-miR-195-5p  | SMAD3 |
| NR2F2 | hsa-miR-193b-3p | SMAD3 |
| NR2F2 | hsa-miR-4516    | STAT3 |
| NR2F2 | hsa-miR-4516    | TP53  |
| NR2F2 | hsa-miR-223-3p  | IL6   |
| NR2F2 | hsa-miR-223-3p  | TP53  |
| NR2F2 | hsa-miR-21-5p   | TGFB1 |
| NR2F2 | hsa-miR-21-5p   | HIF1A |
| NR2F2 | hsa-miR-21-5p   | NFKB1 |
| NR2F2 | hsa-miR-211-5p  | TGFB1 |
| NR2F2 | hsa-miR-199a-5p | PTGS2 |

|       |                  |       |
|-------|------------------|-------|
| NR2F2 | hsa-miR-199a-5p  | HIF1A |
| NR2F2 | hsa-miR-199a-5p  | NFKB1 |
| NR2F2 | hsa-miR-145-5p   | SMAD3 |
| NR2F2 | hsa-miR-449c-5p  | HIF1A |
| NR2F2 | hsa-miR-24-3p    | TGFB1 |
| NR2F2 | hsa-miR-106b-3p  | HIF1A |
| NR3C1 | hsa-miR-4720-3p  | STAT3 |
| NR3C1 | hsa-miR-3934-5p  | PTGS2 |
| NR3C1 | hsa-miR-210-3p   | HIF1A |
| NR3C1 | hsa-miR-4799-5p  | HIF1A |
| NR3C1 | hsa-miR-1908-5p  | PTGS2 |
| NR3C1 | hsa-miR-18b-5p   | HIF1A |
| NR3C1 | hsa-let-7a-5p    | IL6   |
| NR3C1 | hsa-let-7a-5p    | PTGS2 |
| NR3C1 | hsa-miR-106a-3p  | HIF1A |
| NR3C1 | hsa-let-7b-5p    | PTGS2 |
| NR3C1 | hsa-let-7b-5p    | HIF1A |
| NR3C1 | hsa-miR-5692a    | HIF1A |
| NR3C1 | hsa-miR-143-3p   | PTGS2 |
| NR3C1 | hsa-miR-143-3p   | SMAD3 |
| NR3C1 | hsa-miR-203a-3p  | IL6   |
| NR3C1 | hsa-miR-150-5p   | TP53  |
| NR3C1 | hsa-miR-5197-5p  | TP53  |
| NR3C1 | hsa-miR-193b-3p  | SMAD3 |
| NR3C1 | hsa-miR-365a-3p  | IL6   |
| NR3C1 | hsa-miR-92a-2-5p | TP53  |
| NR3C1 | hsa-miR-622      | TP53  |
| NR3C1 | hsa-miR-3128     | HIF1A |
| NR3C1 | hsa-miR-1296-3p  | TP53  |
| NR3C1 | hsa-miR-324-3p   | TGFB1 |
| NR3C1 | hsa-miR-4516     | STAT3 |
| NR3C1 | hsa-miR-4516     | TP53  |
| NR3C1 | hsa-miR-4531     | TP53  |
| NR3C1 | hsa-miR-20b-5p   | HIF1A |
| NR3C1 | hsa-miR-21-5p    | TGFB1 |
| NR3C1 | hsa-miR-21-5p    | HIF1A |

|       |                 |       |
|-------|-----------------|-------|
| NR3C1 | hsa-miR-663a    | TGFB1 |
| NR3C1 | hsa-miR-145-5p  | SMAD3 |
| NR3C1 | hsa-miR-5193    | TP53  |
| NR3C1 | hsa-miR-181a-5p | PTGS2 |
| NR3C1 | hsa-miR-181a-5p | STAT3 |
| NR3C1 | hsa-miR-1-3p    | IL6   |
| NR3C1 | hsa-miR-589-5p  | PTGS2 |
| NR3C1 | hsa-miR-6789-3p | STAT3 |
| NR3C1 | hsa-miR-4487    | HIF1A |
| NR3C1 | hsa-miR-92b-3p  | SMAD3 |
| NR3C1 | hsa-miR-6837-5p | STAT3 |
| NR3C1 | hsa-miR-365a-5p | STAT3 |
| NR3C1 | hsa-miR-106a-5p | TP53  |
| NR3C1 | hsa-miR-744-5p  | PTGS2 |
| NR3C1 | hsa-miR-744-5p  | TGFB1 |
| NR3C1 | hsa-miR-101-3p  | PTGS2 |
| NR3C1 | hsa-miR-320a    | PTGS2 |
| NR5A1 | hsa-miR-296-3p  | PTGS2 |
| NR5A1 | hsa-miR-1910-3p | HIF1A |
| NR5A1 | hsa-miR-663a    | TGFB1 |
| NRF1  | hsa-miR-18a-5p  | HIF1A |
| NRF1  | hsa-miR-203a-3p | TNF   |
| NRF1  | hsa-miR-130b-3p | STAT3 |
| NRF1  | hsa-miR-130a-3p | TGFB1 |
| NRF1  | hsa-miR-130a-3p | TNF   |
| NRF1  | hsa-miR-199a-5p | NFKB1 |
| NRF1  | hsa-miR-199a-5p | HIF1A |
| NRF1  | hsa-miR-4470    | HIF1A |
| NRF1  | hsa-miR-484     | IL2   |
| NRF1  | hsa-miR-19a-3p  | TNF   |
| NRF1  | hsa-miR-17-5p   | TGFB1 |
| NRF1  | hsa-miR-17-5p   | HIF1A |
| NRF1  | hsa-miR-4738-3p | TLR4  |
| NRF1  | hsa-miR-92a-3p  | NFKB1 |
| NRF1  | hsa-miR-452-5p  | TNF   |
| NRF1  | hsa-miR-19b-3p  | TGFB1 |



|       |                  |       |
|-------|------------------|-------|
| NRF1  | hsa-miR-449c-5p  | HIF1A |
| NRF1  | hsa-miR-663a     | TGFB1 |
| NRF1  | hsa-miR-138-5p   | HIF1A |
| NRF1  | hsa-miR-20a-5p   | HIF1A |
| OTX2  | hsa-miR-9-5p     | NFKB1 |
| OTX2  | hsa-miR-4720-3p  | STAT3 |
| OTX2  | hsa-miR-4650-5p  | TP53  |
| OTX2  | hsa-miR-149-5p   | IL6   |
| OTX2  | hsa-miR-130b-3p  | STAT3 |
| OTX2  | hsa-miR-7110-3p  | STAT3 |
| OTX2  | hsa-miR-203a-3p  | IL6   |
| OTX2  | hsa-miR-193b-3p  | SMAD3 |
| OTX2  | hsa-miR-6511a-5p | HIF1A |
| OTX2  | hsa-miR-2682-5p  | HIF1A |
| OTX2  | hsa-miR-149-3p   | TP53  |
| OTX2  | hsa-miR-21-5p    | TGFB1 |
| OTX2  | hsa-miR-21-5p    | HIF1A |
| OTX2  | hsa-miR-21-5p    | NFKB1 |
| OTX2  | hsa-miR-137      | PTGS2 |
| OTX2  | hsa-miR-3074-3p  | HIF1A |
| OTX2  | hsa-miR-24-3p    | TGFB1 |
| OTX2  | hsa-miR-589-5p   | PTGS2 |
| OTX2  | hsa-miR-1322     | HIF1A |
| OTX2  | hsa-miR-618      | STAT3 |
| OTX2  | hsa-miR-128-3p   | PTGS2 |
| OTX2  | hsa-miR-6875-3p  | STAT3 |
| OTX2  | hsa-miR-200a-3p  | TP53  |
| OTX2  | hsa-miR-200a-3p  | SMAD3 |
| OTX2  | hsa-miR-124-3p   | IL6   |
| OTX2  | hsa-miR-124-3p   | PTGS2 |
| OTX2  | hsa-miR-124-3p   | STAT3 |
| OTX2  | hsa-miR-34b-5p   | HIF1A |
| OVOL2 | hsa-miR-22-3p    | HIF1A |
| PATZ1 | hsa-miR-18a-5p   | SMAD3 |
| PATZ1 | hsa-miR-17-5p    | PTGS2 |
| PATZ1 | hsa-miR-17-5p    | SMAD3 |

|       |                  |       |
|-------|------------------|-------|
| PATZ1 | hsa-miR-18a-3p   | SMAD3 |
| PAX5  | hsa-miR-18a-5p   | TP53  |
| PAX5  | hsa-miR-18a-5p   | HIF1A |
| PAX5  | hsa-miR-625-3p   | HIF1A |
| PAX5  | hsa-miR-9-5p     | NFKB1 |
| PAX5  | hsa-miR-5094     | HIF1A |
| PAX5  | hsa-miR-365a-5p  | STAT3 |
| PAX5  | hsa-miR-199b-5p  | HIF1A |
| PAX5  | hsa-miR-24-3p    | TGFB1 |
| PAX5  | hsa-miR-19a-3p   | TNF   |
| PAX5  | hsa-miR-19a-3p   | TP53  |
| PAX5  | hsa-miR-6511a-5p | HIF1A |
| PAX5  | hsa-miR-92a-3p   | NFKB1 |
| PAX5  | hsa-miR-4516     | STAT3 |
| PAX5  | hsa-miR-4516     | TP53  |
| PAX5  | hsa-miR-132-3p   | PTGS2 |
| PAX5  | hsa-miR-320a     | PTGS2 |
| PAX5  | hsa-miR-449c-5p  | HIF1A |
| PAX5  | hsa-miR-5193     | TP53  |
| PAX5  | hsa-miR-17-5p    | PTGS2 |
| PAX5  | hsa-miR-17-5p    | TP53  |
| PAX5  | hsa-miR-17-5p    | HIF1A |
| PAX5  | hsa-miR-17-5p    | TGFB1 |
| PAX5  | hsa-miR-663a     | TGFB1 |
| PAX5  | hsa-miR-6872-3p  | STAT3 |
| PAX5  | hsa-miR-589-5p   | PTGS2 |
| PAX5  | hsa-miR-6789-3p  | STAT3 |
| PAX5  | hsa-miR-4487     | HIF1A |
| PAX5  | hsa-miR-3662     | HIF1A |
| PAX5  | hsa-miR-922      | STAT3 |
| PAX5  | hsa-miR-1234-3p  | STAT3 |
| PAX5  | hsa-miR-20a-5p   | TP53  |
| PAX5  | hsa-miR-20a-5p   | HIF1A |
| PAX5  | hsa-miR-1181     | STAT3 |
| PAX5  | hsa-miR-210-3p   | NFKB1 |
| PAX5  | hsa-miR-210-3p   | HIF1A |

|        |                  |       |
|--------|------------------|-------|
| PAX5   | hsa-miR-128-3p   | PTGS2 |
| PAX5   | hsa-miR-92a-1-5p | TP53  |
| PBX1   | hsa-miR-4419a    | TP53  |
| PBX1   | hsa-miR-5197-5p  | TP53  |
| PBX3   | hsa-miR-150-5p   | TP53  |
| PBX3   | hsa-miR-6133     | TP53  |
| PBX3   | hsa-miR-24-3p    | TGFB1 |
| PBX3   | hsa-miR-5692a    | HIF1A |
| PBX3   | hsa-miR-4470     | HIF1A |
| PBX3   | hsa-miR-935      | HIF1A |
| PBX3   | hsa-miR-4650-5p  | TP53  |
| PBX3   | hsa-miR-199a-5p  | HIF1A |
| PBX3   | hsa-miR-663a     | TGFB1 |
| PBX3   | hsa-miR-106b-5p  | STAT3 |
| PBX3   | hsa-miR-106b-5p  | HIF1A |
| PBX3   | hsa-miR-106b-3p  | HIF1A |
| PBX3   | hsa-miR-4531     | TP53  |
| PBX3   | hsa-miR-107      | HIF1A |
| PGR    | hsa-miR-203a-3p  | IL6   |
| PGR    | hsa-miR-26a-5p   | IL6   |
| PGR    | hsa-miR-625-3p   | HIF1A |
| PGR    | hsa-miR-4799-5p  | HIF1A |
| PGR    | hsa-miR-365a-3p  | IL6   |
| PGR    | hsa-miR-4499     | HIF1A |
| PGR    | hsa-miR-494-3p   | HIF1A |
| PGR    | hsa-miR-6893-5p  | HIF1A |
| PGR    | hsa-miR-1910-3p  | HIF1A |
| PGR    | hsa-miR-4487     | HIF1A |
| PGR    | hsa-miR-124-3p   | IL6   |
| PGR    | hsa-miR-107      | IL6   |
| PGR    | hsa-miR-107      | HIF1A |
| POU2F2 | hsa-miR-150-5p   | TP53  |
| POU2F2 | hsa-miR-365a-5p  | STAT3 |
| POU2F2 | hsa-miR-24-3p    | TGFB1 |
| POU2F2 | hsa-miR-146b-5p  | NFKB1 |
| POU2F2 | hsa-miR-6511a-5p | HIF1A |

|        |                 |       |
|--------|-----------------|-------|
| POU2F2 | hsa-miR-6807-3p | HIF1A |
| POU2F2 | hsa-miR-6807-5p | STAT3 |
| POU2F2 | hsa-miR-3662    | HIF1A |
| POU2F2 | hsa-miR-1181    | STAT3 |
| POU2F2 | hsa-miR-155-5p  | NFKB1 |
| POU2F2 | hsa-miR-6872-3p | STAT3 |
| POU5F1 | hsa-miR-132-3p  | PTGS2 |
| POU5F1 | hsa-miR-9-5p    | NFKB1 |
| POU5F1 | hsa-miR-625-3p  | HIF1A |
| POU5F1 | hsa-miR-4799-5p | HIF1A |
| POU5F1 | hsa-miR-146b-5p | NFKB1 |
| POU5F1 | hsa-miR-365a-5p | STAT3 |
| POU5F1 | hsa-let-7b-5p   | PTGS2 |
| POU5F1 | hsa-let-7b-5p   | HIF1A |
| POU5F1 | hsa-miR-33a-5p  | HIF1A |
| POU5F1 | hsa-miR-6808-5p | HIF1A |
| POU5F1 | hsa-miR-149-3p  | TP53  |
| POU5F1 | hsa-miR-1181    | STAT3 |
| POU5F1 | hsa-miR-365a-3p | IL6   |
| POU5F1 | hsa-miR-5692a   | HIF1A |
| POU5F1 | hsa-miR-149-5p  | IL6   |
| POU5F1 | hsa-miR-107     | IL6   |
| POU5F1 | hsa-miR-107     | HIF1A |
| POU5F1 | hsa-miR-935     | HIF1A |
| POU5F1 | hsa-miR-3128    | HIF1A |
| POU5F1 | hsa-miR-2682-5p | HIF1A |
| POU5F1 | hsa-miR-3160-3p | HIF1A |
| POU5F1 | hsa-miR-4650-5p | TP53  |
| POU5F1 | hsa-miR-21-5p   | TGFB1 |
| POU5F1 | hsa-miR-21-5p   | HIF1A |
| POU5F1 | hsa-miR-21-5p   | NFKB1 |
| POU5F1 | hsa-miR-137     | PTGS2 |
| POU5F1 | hsa-miR-449c-5p | HIF1A |
| POU5F1 | hsa-let-7a-5p   | IL6   |
| POU5F1 | hsa-let-7a-5p   | PTGS2 |
| POU5F1 | hsa-let-7a-5p   | NFKB1 |

|        |                 |       |
|--------|-----------------|-------|
| POU5F1 | hsa-miR-6760-5p | TP53  |
| POU5F1 | hsa-miR-92b-3p  | SMAD3 |
| POU5F1 | hsa-miR-4487    | HIF1A |
| POU5F1 | hsa-miR-6875-3p | STAT3 |
| POU5F1 | hsa-miR-130b-3p | STAT3 |
| POU5F1 | hsa-miR-124-3p  | IL6   |
| POU5F1 | hsa-miR-124-3p  | PTGS2 |
| POU5F1 | hsa-miR-124-3p  | STAT3 |
| POU5F1 | hsa-miR-4463    | HIF1A |
| POU5F1 | hsa-miR-34b-5p  | HIF1A |
| POU5F1 | hsa-miR-193b-3p | SMAD3 |
| POU5F1 | hsa-miR-365b-5p | STAT3 |
| POU5F1 | hsa-miR-210-3p  | NFKB1 |
| POU5F1 | hsa-miR-210-3p  | HIF1A |
| POU5F1 | hsa-miR-6872-3p | STAT3 |
| POU5F1 | hsa-miR-320a    | PTGS2 |
| POU5F1 | hsa-miR-7158-5p | STAT3 |
| POU5F1 | hsa-miR-4725-3p | TP53  |
| PPARG  | hsa-miR-625-3p  | HIF1A |
| PPARG  | hsa-miR-4684-5p | STAT3 |
| PPARG  | hsa-miR-199a-5p | HIF1A |
| PPARG  | hsa-miR-1910-3p | HIF1A |
| PPARG  | hsa-miR-4748    | HIF1A |
| PPARG  | hsa-miR-4463    | HIF1A |
| PPARG  | hsa-miR-3668    | HIF1A |
| PPARG  | hsa-miR-107     | HIF1A |
| PRDM1  | hsa-miR-4470    | HIF1A |
| PRDM1  | hsa-miR-3609    | HIF1A |
| PRDM1  | hsa-miR-4720-3p | STAT3 |
| PRDM1  | hsa-let-7c-5p   | IL6   |
| RARG   | hsa-miR-6815-3p | HIF1A |
| RARG   | hsa-miR-22-3p   | HIF1A |
| RARG   | hsa-miR-1181    | STAT3 |
| RARG   | hsa-miR-320a    | PTGS2 |
| RARG   | hsa-miR-1908-5p | PTGS2 |
| RCOR1  | hsa-miR-150-5p  | TP53  |

|       |                  |       |
|-------|------------------|-------|
| RCOR1 | hsa-miR-942-5p   | TLR4  |
| RCOR1 | hsa-miR-143-3p   | PTGS2 |
| RCOR1 | hsa-miR-143-3p   | TNF   |
| RCOR1 | hsa-miR-143-3p   | SMAD3 |
| RCOR1 | hsa-miR-296-3p   | PTGS2 |
| RCOR1 | hsa-miR-4470     | HIF1A |
| RCOR1 | hsa-miR-3160-3p  | HIF1A |
| RCOR1 | hsa-miR-618      | STAT3 |
| RCOR1 | hsa-miR-199a-3p  | PTGS2 |
| RCOR1 | hsa-miR-144-3p   | TGFB1 |
| RCOR1 | hsa-miR-92b-3p   | SMAD3 |
| RCOR1 | hsa-miR-4659b-3p | TLR4  |
| RCOR1 | hsa-miR-124-3p   | IL6   |
| RCOR1 | hsa-miR-124-3p   | PTGS2 |
| RCOR1 | hsa-miR-124-3p   | STAT3 |
| RCOR1 | hsa-miR-199b-5p  | HIF1A |
| RCOR1 | hsa-miR-101-3p   | PTGS2 |
| RCOR1 | hsa-miR-139-5p   | NFKB1 |
| RCOR1 | hsa-miR-4650-5p  | TP53  |
| RCOR1 | hsa-miR-4286     | TP53  |
| RCOR1 | hsa-miR-33a-5p   | HIF1A |
| RCOR1 | hsa-miR-7-5p     | TLR4  |
| RCOR1 | hsa-miR-146b-5p  | NFKB1 |
| RCOR1 | hsa-miR-146b-5p  | TLR4  |
| RCOR1 | hsa-miR-3128     | HIF1A |
| RCOR1 | hsa-miR-6871-3p  | STAT3 |
| RCOR1 | hsa-miR-137      | PTGS2 |
| RCOR1 | hsa-miR-4290     | SMAD3 |
| RCOR1 | hsa-miR-365a-3p  | IL6   |
| RCOR1 | hsa-miR-589-5p   | PTGS2 |
| RCOR1 | hsa-miR-1322     | HIF1A |
| RCOR1 | hsa-miR-138-5p   | HIF1A |
| RCOR1 | hsa-miR-34b-5p   | HIF1A |
| RCOR1 | hsa-miR-320a     | PTGS2 |
| RCOR1 | hsa-miR-132-3p   | PTGS2 |
| RCOR1 | hsa-miR-9-5p     | NFKB1 |

|       |                  |       |
|-------|------------------|-------|
| RCOR1 | hsa-miR-5193     | TP53  |
| RCOR1 | hsa-miR-146a-5p  | PTGS2 |
| RCOR1 | hsa-miR-146a-5p  | TLR4  |
| RCOR1 | hsa-miR-146a-5p  | NFKB1 |
| RCOR1 | hsa-miR-6809-3p  | STAT3 |
| RCOR1 | hsa-miR-5197-5p  | TP53  |
| RCOR1 | hsa-miR-6815-3p  | HIF1A |
| RCOR1 | hsa-miR-30e-5p   | TP53  |
| RCOR1 | hsa-let-7a-5p    | IL6   |
| RCOR1 | hsa-let-7a-5p    | PTGS2 |
| RCOR1 | hsa-let-7a-5p    | NFKB1 |
| RCOR1 | hsa-miR-4271     | TP53  |
| RCOR1 | hsa-miR-3662     | HIF1A |
| RCOR1 | hsa-miR-365a-5p  | STAT3 |
| RCOR1 | hsa-miR-1181     | STAT3 |
| RCOR1 | hsa-miR-4441     | STAT3 |
| RCOR1 | hsa-miR-130a-3p  | TGFB1 |
| RCOR1 | hsa-miR-130a-3p  | TNF   |
| RCOR1 | hsa-miR-6760-5p  | TP53  |
| RCOR1 | hsa-miR-193b-3p  | SMAD3 |
| RCOR1 | hsa-let-7e-5p    | STAT3 |
| RCOR1 | hsa-miR-30b-5p   | TP53  |
| RCOR1 | hsa-miR-4659a-3p | TLR4  |
| RCOR1 | hsa-miR-223-3p   | IL6   |
| RCOR1 | hsa-miR-223-3p   | TP53  |
| RCOR1 | hsa-miR-21-5p    | TGFB1 |
| RCOR1 | hsa-miR-21-5p    | TLR4  |
| RCOR1 | hsa-miR-21-5p    | HIF1A |
| RCOR1 | hsa-miR-21-5p    | NFKB1 |
| RCOR1 | hsa-miR-199a-5p  | PTGS2 |
| RCOR1 | hsa-miR-199a-5p  | HIF1A |
| RCOR1 | hsa-miR-199a-5p  | NFKB1 |
| RCOR1 | hsa-miR-145-5p   | SMAD3 |
| RCOR1 | hsa-miR-24-3p    | TGFB1 |
| RELA  | hsa-miR-139-5p   | NFKB1 |
| RELA  | hsa-miR-625-3p   | HIF1A |

|      |                  |       |
|------|------------------|-------|
| RELA | hsa-miR-4799-5p  | HIF1A |
| RELA | hsa-miR-1908-5p  | PTGS2 |
| RELA | hsa-miR-365a-5p  | STAT3 |
| RELA | hsa-miR-4487     | HIF1A |
| RELA | hsa-miR-6760-5p  | TP53  |
| RELA | hsa-miR-130a-3p  | TGFB1 |
| RELA | hsa-miR-130a-3p  | TNF   |
| RELA | hsa-miR-150-5p   | TP53  |
| RELA | hsa-miR-195-5p   | SMAD3 |
| RELA | hsa-miR-365a-3p  | IL6   |
| RELA | hsa-miR-193b-3p  | SMAD3 |
| RELA | hsa-miR-4470     | HIF1A |
| RELA | hsa-miR-6845-3p  | STAT3 |
| RELA | hsa-miR-4738-3p  | TLR4  |
| RELA | hsa-miR-142-3p   | IL6   |
| RELA | hsa-miR-6789-3p  | STAT3 |
| RELA | hsa-miR-4531     | TP53  |
| RELA | hsa-miR-1322     | HIF1A |
| RELA | hsa-miR-21-5p    | TGFB1 |
| RELA | hsa-miR-21-5p    | TLR4  |
| RELA | hsa-miR-21-5p    | HIF1A |
| RELA | hsa-miR-21-5p    | NFKB1 |
| RELA | hsa-miR-153-5p   | HIF1A |
| RELA | hsa-miR-128-3p   | PTGS2 |
| RELA | hsa-miR-9-5p     | NFKB1 |
| RELA | hsa-miR-5193     | TP53  |
| RELA | hsa-miR-6871-3p  | STAT3 |
| RELA | hsa-miR-663a     | TGFB1 |
| RELA | hsa-miR-146a-5p  | PTGS2 |
| RELA | hsa-miR-146a-5p  | TLR4  |
| RELA | hsa-miR-146a-5p  | NFKB1 |
| RELA | hsa-miR-138-2-3p | STAT3 |
| RELA | hsa-miR-589-5p   | PTGS2 |
| RELA | hsa-miR-6875-3p  | STAT3 |
| RELA | hsa-let-7i-5p    | TLR4  |
| RELA | hsa-miR-618      | STAT3 |



|      |                 |       |
|------|-----------------|-------|
| RELA | hsa-miR-92b-3p  | SMAD3 |
| RELA | hsa-miR-449c-5p | HIF1A |
| RELA | hsa-miR-146b-5p | NFKB1 |
| RELA | hsa-miR-146b-5p | TLR4  |
| RELA | hsa-miR-3662    | HIF1A |
| RELA | hsa-miR-138-5p  | HIF1A |
| RELA | hsa-miR-1181    | STAT3 |
| RELA | hsa-miR-155-5p  | IL6   |
| RELA | hsa-miR-155-5p  | NFKB1 |
| RELA | hsa-miR-155-5p  | SMAD3 |
| RELA | hsa-miR-210-3p  | NFKB1 |
| RELA | hsa-miR-210-3p  | HIF1A |
| RELA | hsa-miR-6872-3p | STAT3 |
| RELA | hsa-miR-17-5p   | TGFB1 |
| RELA | hsa-miR-17-5p   | PTGS2 |
| RELA | hsa-miR-17-5p   | HIF1A |
| RELA | hsa-miR-17-5p   | SMAD3 |
| RELA | hsa-miR-17-5p   | TP53  |
| RELA | hsa-miR-223-3p  | IL6   |
| RELA | hsa-miR-223-3p  | TP53  |
| RELA | hsa-miR-24-3p   | TGFB1 |
| REST | hsa-miR-3934-5p | PTGS2 |
| REST | hsa-miR-150-5p  | TP53  |
| REST | hsa-miR-4684-5p | STAT3 |
| REST | hsa-miR-130b-3p | STAT3 |
| REST | hsa-miR-942-5p  | TLR4  |
| REST | hsa-miR-18a-5p  | TP53  |
| REST | hsa-miR-18a-5p  | HIF1A |
| REST | hsa-miR-18a-5p  | SMAD3 |
| REST | hsa-miR-22-3p   | HIF1A |
| REST | hsa-miR-4470    | HIF1A |
| REST | hsa-miR-4748    | HIF1A |
| REST | hsa-miR-146b-5p | NFKB1 |
| REST | hsa-miR-146b-5p | TLR4  |
| REST | hsa-miR-92a-3p  | NFKB1 |
| REST | hsa-let-7i-5p   | TLR4  |

|      |                  |       |
|------|------------------|-------|
| REST | hsa-miR-199a-3p  | PTGS2 |
| REST | hsa-miR-144-3p   | TGFB1 |
| REST | hsa-miR-6807-3p  | HIF1A |
| REST | hsa-miR-4487     | HIF1A |
| REST | hsa-miR-92b-3p   | SMAD3 |
| REST | hsa-miR-4659b-3p | TLR4  |
| REST | hsa-miR-4662a-5p | HIF1A |
| REST | hsa-miR-199b-5p  | HIF1A |
| REST | hsa-miR-92a-1-5p | TP53  |
| REST | hsa-miR-18a-3p   | SMAD3 |
| REST | hsa-miR-139-5p   | NFKB1 |
| REST | hsa-miR-4685-5p  | STAT3 |
| REST | hsa-miR-365a-5p  | STAT3 |
| REST | hsa-miR-15b-5p   | SMAD3 |
| REST | hsa-miR-7-5p     | TLR4  |
| REST | hsa-miR-155-5p   | IL6   |
| REST | hsa-miR-155-5p   | NFKB1 |
| REST | hsa-miR-155-5p   | SMAD3 |
| REST | hsa-miR-5692a    | HIF1A |
| REST | hsa-miR-6511a-5p | HIF1A |
| REST | hsa-miR-622      | TP53  |
| REST | hsa-miR-4738-3p  | TLR4  |
| REST | hsa-miR-5702     | TP53  |
| REST | hsa-miR-137      | PTGS2 |
| REST | hsa-miR-8071     | TP53  |
| REST | hsa-miR-663a     | TGFB1 |
| REST | hsa-miR-365a-3p  | IL6   |
| REST | hsa-miR-6789-3p  | STAT3 |
| REST | hsa-miR-6875-3p  | STAT3 |
| REST | hsa-miR-138-5p   | HIF1A |
| REST | hsa-miR-320a     | PTGS2 |
| REST | hsa-miR-132-3p   | PTGS2 |
| REST | hsa-miR-1908-5p  | PTGS2 |
| REST | hsa-miR-5193     | TP53  |
| REST | hsa-miR-16-5p    | PTGS2 |
| REST | hsa-miR-16-5p    | TP53  |

|      |                  |       |
|------|------------------|-------|
| REST | hsa-miR-16-5p    | NFKB1 |
| REST | hsa-miR-16-5p    | SMAD3 |
| REST | hsa-miR-5197-5p  | TP53  |
| REST | hsa-miR-935      | HIF1A |
| REST | hsa-miR-19a-3p   | TNF   |
| REST | hsa-miR-19a-3p   | TP53  |
| REST | hsa-miR-2682-5p  | HIF1A |
| REST | hsa-miR-142-3p   | IL6   |
| REST | hsa-miR-1468-3p  | TLR4  |
| REST | hsa-miR-618      | STAT3 |
| REST | hsa-miR-3662     | HIF1A |
| REST | hsa-miR-4279     | TLR4  |
| REST | hsa-miR-1181     | STAT3 |
| REST | hsa-miR-4441     | STAT3 |
| REST | hsa-miR-3121-3p  | HIF1A |
| REST | hsa-miR-193b-3p  | SMAD3 |
| REST | hsa-miR-4659a-3p | TLR4  |
| REST | hsa-miR-199a-5p  | PTGS2 |
| REST | hsa-miR-199a-5p  | HIF1A |
| REST | hsa-miR-199a-5p  | NFKB1 |
| REST | hsa-miR-145-5p   | SMAD3 |
| REST | hsa-miR-24-3p    | TGFB1 |
| REST | hsa-miR-128-3p   | PTGS2 |
| REST | hsa-miR-6807-5p  | STAT3 |
| RFX1 | hsa-let-7b-5p    | PTGS2 |
| RFX1 | hsa-let-7b-5p    | HIF1A |
| RFX1 | hsa-miR-21-5p    | TGFB1 |
| RFX1 | hsa-miR-21-5p    | HIF1A |
| RFX1 | hsa-miR-24-3p    | TGFB1 |
| RFX1 | hsa-miR-106b-5p  | STAT3 |
| RFX1 | hsa-miR-106b-5p  | HIF1A |
| RFX1 | hsa-miR-106b-3p  | HIF1A |
| RFX1 | hsa-miR-93-5p    | TGFB1 |
| RFX1 | hsa-miR-93-5p    | STAT3 |
| RFX1 | hsa-miR-93-5p    | HIF1A |
| RFX1 | hsa-miR-6893-5p  | HIF1A |

|      |                  |       |
|------|------------------|-------|
| RFX5 | hsa-miR-26a-5p   | IL6   |
| RFX5 | hsa-miR-210-3p   | NFKB1 |
| RFX5 | hsa-miR-210-3p   | HIF1A |
| RFX5 | hsa-miR-9-5p     | NFKB1 |
| RFX5 | hsa-miR-1908-5p  | PTGS2 |
| RFX5 | hsa-miR-365a-5p  | STAT3 |
| RFX5 | hsa-miR-6809-3p  | STAT3 |
| RFX5 | hsa-miR-99a-5p   | PTGS2 |
| RFX5 | hsa-miR-22-3p    | HIF1A |
| RFX5 | hsa-miR-6760-5p  | TP53  |
| RFX5 | hsa-miR-193b-3p  | SMAD3 |
| RFX5 | hsa-miR-4470     | HIF1A |
| RFX5 | hsa-miR-365a-3p  | IL6   |
| RFX5 | hsa-miR-935      | HIF1A |
| RFX5 | hsa-miR-622      | TP53  |
| RFX5 | hsa-miR-3128     | HIF1A |
| RFX5 | hsa-miR-92a-3p   | NFKB1 |
| RFX5 | hsa-miR-1264     | TP53  |
| RFX5 | hsa-miR-4531     | TP53  |
| RFX5 | hsa-miR-6807-3p  | HIF1A |
| RFX5 | hsa-miR-4419a    | TP53  |
| RFX5 | hsa-miR-6815-3p  | HIF1A |
| RFX5 | hsa-miR-211-5p   | TGFB1 |
| RFX5 | hsa-miR-92a-1-5p | TP53  |
| RFX5 | hsa-miR-652-3p   | PTGS2 |
| RFX5 | hsa-miR-145-5p   | SMAD3 |
| RFX5 | hsa-miR-449c-5p  | HIF1A |
| RFX5 | hsa-miR-5193     | TP53  |
| RFX5 | hsa-miR-17-5p    | TGFB1 |
| RFX5 | hsa-miR-17-5p    | PTGS2 |
| RFX5 | hsa-miR-17-5p    | HIF1A |
| RFX5 | hsa-miR-17-5p    | SMAD3 |
| RFX5 | hsa-miR-17-5p    | TP53  |
| RFX5 | hsa-miR-6872-3p  | STAT3 |
| RFX5 | hsa-miR-6875-3p  | STAT3 |
| RFX5 | hsa-miR-92b-3p   | SMAD3 |

|       |                  |       |
|-------|------------------|-------|
| RFX5  | hsa-miR-6807-5p  | STAT3 |
| RFX5  | hsa-miR-5197-5p  | TP53  |
| RFX5  | hsa-miR-1181     | STAT3 |
| RFX5  | hsa-miR-138-5p   | HIF1A |
| RFX5  | hsa-miR-320a     | PTGS2 |
| RFX5  | hsa-let-7c-5p    | IL6   |
| RFX5  | hsa-let-7c-5p    | PTGS2 |
| RFX5  | hsa-miR-107      | IL6   |
| RFX5  | hsa-miR-107      | HIF1A |
| RUNX1 | hsa-miR-548ah-5p | HIF1A |
| RUNX1 | hsa-miR-4720-3p  | STAT3 |
| RUNX1 | hsa-miR-3934-5p  | PTGS2 |
| RUNX1 | hsa-miR-210-3p   | NFKB1 |
| RUNX1 | hsa-miR-210-3p   | HIF1A |
| RUNX1 | hsa-miR-150-5p   | TP53  |
| RUNX1 | hsa-miR-153-5p   | HIF1A |
| RUNX1 | hsa-miR-365a-5p  | STAT3 |
| RUNX1 | hsa-miR-149-3p   | TP53  |
| RUNX1 | hsa-miR-24-3p    | TGFB1 |
| RUNX1 | hsa-miR-5197-5p  | TP53  |
| RUNX1 | hsa-miR-26b-5p   | NFKB1 |
| RUNX1 | hsa-miR-26b-5p   | PTGS2 |
| RUNX1 | hsa-miR-92a-2-5p | TP53  |
| RUNX1 | hsa-miR-92a-3p   | NFKB1 |
| RUNX1 | hsa-miR-223-3p   | TP53  |
| RUNX1 | hsa-miR-5193     | TP53  |
| RUNX1 | hsa-miR-6871-3p  | STAT3 |
| RUNX1 | hsa-let-7a-5p    | PTGS2 |
| RUNX1 | hsa-let-7a-5p    | NFKB1 |
| RUNX1 | hsa-miR-146a-5p  | PTGS2 |
| RUNX1 | hsa-miR-146a-5p  | NFKB1 |
| RUNX1 | hsa-miR-5681a    | STAT3 |
| RUNX1 | hsa-miR-5681b    | HIF1A |
| RUNX1 | hsa-miR-4487     | HIF1A |
| RUNX1 | hsa-miR-200a-3p  | TP53  |
| RUNX1 | hsa-miR-155-5p   | NFKB1 |

|       |                 |       |
|-------|-----------------|-------|
| RUNX1 | hsa-miR-101-3p  | PTGS2 |
| RUNX1 | hsa-miR-424-5p  | HIF1A |
| RUNX1 | hsa-miR-199b-5p | HIF1A |
| RUNX1 | hsa-miR-7158-5p | STAT3 |
| RUNX3 | hsa-miR-132-3p  | PTGS2 |
| RUNX3 | hsa-miR-139-5p  | NFKB1 |
| RUNX3 | hsa-miR-625-3p  | HIF1A |
| RUNX3 | hsa-miR-9-5p    | NFKB1 |
| RUNX3 | hsa-miR-4270    | STAT3 |
| RUNX3 | hsa-miR-5094    | HIF1A |
| RUNX3 | hsa-miR-365a-5p | STAT3 |
| RUNX3 | hsa-miR-199b-5p | HIF1A |
| RUNX3 | hsa-miR-150-5p  | TP53  |
| RUNX3 | hsa-miR-6760-5p | TP53  |
| RUNX3 | hsa-miR-210-3p  | NFKB1 |
| RUNX3 | hsa-miR-210-3p  | HIF1A |
| RUNX3 | hsa-miR-4799-5p | HIF1A |
| RUNX3 | hsa-miR-128-3p  | PTGS2 |
| RUNX3 | hsa-miR-142-3p  | IL6   |
| RUNX3 | hsa-miR-449c-5p | HIF1A |
| RUNX3 | hsa-miR-3529-3p | TP53  |
| RUNX3 | hsa-miR-5193    | TP53  |
| RUNX3 | hsa-miR-30e-5p  | TP53  |
| RUNX3 | hsa-miR-6871-3p | STAT3 |
| RUNX3 | hsa-let-7a-5p   | IL6   |
| RUNX3 | hsa-let-7a-5p   | PTGS2 |
| RUNX3 | hsa-let-7a-5p   | NFKB1 |
| RUNX3 | hsa-miR-365a-3p | IL6   |
| RUNX3 | hsa-miR-589-5p  | PTGS2 |
| RUNX3 | hsa-miR-1322    | HIF1A |
| RUNX3 | hsa-miR-6875-3p | STAT3 |
| RUNX3 | hsa-miR-3662    | HIF1A |
| RUNX3 | hsa-miR-146b-5p | NFKB1 |
| RUNX3 | hsa-miR-124-3p  | IL6   |
| RUNX3 | hsa-miR-124-3p  | PTGS2 |
| RUNX3 | hsa-miR-124-3p  | STAT3 |

|        |                  |       |
|--------|------------------|-------|
| RUNX3  | hsa-miR-138-5p   | HIF1A |
| RUNX3  | hsa-miR-4531     | TP53  |
| RUNX3  | hsa-miR-6872-3p  | STAT3 |
| RUNX3  | hsa-miR-320a     | PTGS2 |
| RUNX3  | hsa-miR-223-3p   | IL6   |
| RUNX3  | hsa-miR-223-3p   | TP53  |
| RXRA   | hsa-let-7b-5p    | PTGS2 |
| RXRA   | hsa-let-7b-5p    | TLR4  |
| RXRA   | hsa-let-7b-5p    | HIF1A |
| RXRA   | hsa-miR-7-5p     | TLR4  |
| RXRA   | hsa-miR-22-3p    | HIF1A |
| RXRA   | hsa-miR-6722-3p  | TP53  |
| RXRA   | hsa-miR-6511a-5p | HIF1A |
| RXRA   | hsa-miR-4516     | STAT3 |
| RXRA   | hsa-miR-4516     | TP53  |
| RXRA   | hsa-miR-21-5p    | TGFB1 |
| RXRA   | hsa-miR-21-5p    | TLR4  |
| RXRA   | hsa-miR-21-5p    | HIF1A |
| RXRA   | hsa-miR-199a-5p  | PTGS2 |
| RXRA   | hsa-miR-199a-5p  | HIF1A |
| RXRA   | hsa-miR-199a-3p  | PTGS2 |
| RXRA   | hsa-miR-663a     | TGFB1 |
| RXRA   | hsa-let-7i-5p    | TLR4  |
| RXRA   | hsa-miR-107      | HIF1A |
| SETDB1 | hsa-miR-18a-5p   | TP53  |
| SETDB1 | hsa-miR-18a-5p   | HIF1A |
| SETDB1 | hsa-miR-18a-5p   | SMAD3 |
| SETDB1 | hsa-miR-9-5p     | NFKB1 |
| SETDB1 | hsa-miR-153-5p   | HIF1A |
| SETDB1 | hsa-miR-4286     | TP53  |
| SETDB1 | hsa-miR-4470     | HIF1A |
| SETDB1 | hsa-miR-3165     | TP53  |
| SETDB1 | hsa-miR-19a-3p   | TP53  |
| SETDB1 | hsa-miR-622      | TP53  |
| SETDB1 | hsa-miR-4290     | SMAD3 |
| SETDB1 | hsa-miR-19b-3p   | TP53  |

|        |                  |       |
|--------|------------------|-------|
| SETDB1 | hsa-miR-5193     | TP53  |
| SETDB1 | hsa-miR-17-5p    | PTGS2 |
| SETDB1 | hsa-miR-17-5p    | TP53  |
| SETDB1 | hsa-miR-17-5p    | HIF1A |
| SETDB1 | hsa-miR-17-5p    | SMAD3 |
| SETDB1 | hsa-miR-6760-5p  | TP53  |
| SETDB1 | hsa-miR-589-5p   | PTGS2 |
| SETDB1 | hsa-miR-6875-3p  | STAT3 |
| SETDB1 | hsa-miR-4662a-5p | HIF1A |
| SETDB1 | hsa-miR-922      | STAT3 |
| SETDB1 | hsa-miR-20a-5p   | TP53  |
| SETDB1 | hsa-miR-20a-5p   | HIF1A |
| SETDB1 | hsa-miR-1181     | STAT3 |
| SETDB1 | hsa-miR-155-5p   | NFKB1 |
| SETDB1 | hsa-miR-155-5p   | SMAD3 |
| SETDB1 | hsa-miR-92a-1-5p | TP53  |
| SETDB1 | hsa-miR-18a-3p   | SMAD3 |
| SIX5   | hsa-miR-24-3p    | TGFB1 |
| SIX5   | hsa-miR-150-5p   | TP53  |
| SIX5   | hsa-miR-145-5p   | SMAD3 |
| SIX5   | hsa-miR-663a     | TGFB1 |
| SIX5   | hsa-miR-4516     | STAT3 |
| SIX5   | hsa-miR-4516     | TP53  |
| SIX5   | hsa-miR-6789-3p  | STAT3 |
| SMAD1  | hsa-miR-132-3p   | PTGS2 |
| SMAD1  | hsa-miR-9-5p     | NFKB1 |
| SMAD1  | hsa-miR-3165     | TP53  |
| SMAD1  | hsa-miR-4720-3p  | STAT3 |
| SMAD1  | hsa-miR-210-3p   | NFKB1 |
| SMAD1  | hsa-miR-210-3p   | HIF1A |
| SMAD1  | hsa-miR-1234-3p  | STAT3 |
| SMAD1  | hsa-miR-24-3p    | TGFB1 |
| SMAD1  | hsa-miR-22-3p    | HIF1A |
| SMAD1  | hsa-miR-4470     | HIF1A |
| SMAD1  | hsa-miR-935      | HIF1A |
| SMAD1  | hsa-miR-454-3p   | TP53  |



|       |                  |       |
|-------|------------------|-------|
| SMAD1 | hsa-miR-6511a-5p | HIF1A |
| SMAD1 | hsa-miR-6845-3p  | STAT3 |
| SMAD1 | hsa-miR-2682-5p  | HIF1A |
| SMAD1 | hsa-miR-4516     | STAT3 |
| SMAD1 | hsa-miR-4516     | TP53  |
| SMAD1 | hsa-miR-21-5p    | TGFB1 |
| SMAD1 | hsa-miR-21-5p    | HIF1A |
| SMAD1 | hsa-miR-21-5p    | NFKB1 |
| SMAD1 | hsa-miR-1908-5p  | PTGS2 |
| SMAD1 | hsa-miR-137      | PTGS2 |
| SMAD1 | hsa-miR-199a-5p  | PTGS2 |
| SMAD1 | hsa-miR-199a-5p  | HIF1A |
| SMAD1 | hsa-miR-199a-5p  | NFKB1 |
| SMAD1 | hsa-miR-3074-3p  | HIF1A |
| SMAD1 | hsa-miR-449c-5p  | HIF1A |
| SMAD1 | hsa-miR-199a-3p  | PTGS2 |
| SMAD1 | hsa-miR-6872-3p  | STAT3 |
| SMAD1 | hsa-miR-149-3p   | TP53  |
| SMAD1 | hsa-miR-589-5p   | PTGS2 |
| SMAD1 | hsa-miR-92b-3p   | SMAD3 |
| SMAD1 | hsa-miR-6875-3p  | STAT3 |
| SMAD1 | hsa-miR-200a-3p  | TP53  |
| SMAD1 | hsa-miR-200a-3p  | SMAD3 |
| SMAD1 | hsa-miR-130b-3p  | STAT3 |
| SMAD1 | hsa-miR-138-5p   | HIF1A |
| SMAD1 | hsa-miR-124-3p   | PTGS2 |
| SMAD1 | hsa-miR-124-3p   | STAT3 |
| SMAD1 | hsa-miR-34b-5p   | HIF1A |
| SMAD1 | hsa-miR-1181     | STAT3 |
| SMAD2 | hsa-miR-24-3p    | TGFB1 |
| SMAD2 | hsa-miR-193b-3p  | SMAD3 |
| SMAD2 | hsa-miR-4290     | SMAD3 |
| SMAD2 | hsa-miR-181c-5p  | IL2   |
| SMAD2 | hsa-miR-744-5p   | TGFB1 |
| SMAD4 | hsa-miR-22-3p    | HIF1A |
| SMAD4 | hsa-miR-935      | HIF1A |

|         |                  |       |
|---------|------------------|-------|
| SMAD4   | hsa-miR-6511a-5p | HIF1A |
| SMAD4   | hsa-miR-21-5p    | TGFB1 |
| SMAD4   | hsa-miR-21-5p    | HIF1A |
| SMAD4   | hsa-miR-6893-5p  | HIF1A |
| SMAD4   | hsa-miR-124-3p   | PTGS2 |
| SMAD4   | hsa-miR-124-3p   | STAT3 |
| SMAD4   | hsa-miR-1234-3p  | STAT3 |
| SMAD4   | hsa-miR-92a-1-5p | TP53  |
| SMAD4   | hsa-miR-18a-3p   | SMAD3 |
| SMARCC1 | hsa-miR-145-5p   | SMAD3 |
| SMARCC1 | hsa-miR-365a-5p  | STAT3 |
| SMARCC1 | hsa-miR-1181     | STAT3 |
| SMARCC1 | hsa-miR-4279     | TLR4  |
| SMARCC1 | hsa-miR-7113-5p  | STAT3 |
| SMARCC1 | hsa-miR-92b-3p   | SMAD3 |
| SMARCC2 | hsa-miR-7-5p     | TLR4  |
| SMARCC2 | hsa-miR-3165     | TP53  |
| SMARCC2 | hsa-miR-4738-3p  | TLR4  |
| SNAI2   | hsa-miR-132-3p   | PTGS2 |
| SNAI2   | hsa-miR-210-3p   | NFKB1 |
| SNAI2   | hsa-miR-210-3p   | HIF1A |
| SNAI2   | hsa-miR-130b-3p  | STAT3 |
| SNAI2   | hsa-miR-6754-5p  | STAT3 |
| SNAI2   | hsa-miR-6809-3p  | STAT3 |
| SNAI2   | hsa-miR-6808-5p  | HIF1A |
| SNAI2   | hsa-miR-935      | HIF1A |
| SNAI2   | hsa-miR-6511a-5p | HIF1A |
| SNAI2   | hsa-miR-2682-5p  | HIF1A |
| SNAI2   | hsa-miR-1908-5p  | PTGS2 |
| SNAI2   | hsa-miR-93-5p    | TGFB1 |
| SNAI2   | hsa-miR-93-5p    | STAT3 |
| SNAI2   | hsa-miR-93-5p    | HIF1A |
| SNAI2   | hsa-miR-4516     | STAT3 |
| SNAI2   | hsa-miR-6815-3p  | HIF1A |
| SNAI2   | hsa-miR-137      | PTGS2 |
| SNAI2   | hsa-miR-449c-5p  | HIF1A |

|       |                 |       |
|-------|-----------------|-------|
| SNAI2 | hsa-miR-589-5p  | PTGS2 |
| SNAI2 | hsa-miR-940     | HIF1A |
| SNAI2 | hsa-miR-7113-5p | STAT3 |
| SNAI2 | hsa-miR-106b-3p | HIF1A |
| SNAI2 | hsa-miR-618     | STAT3 |
| SNAI2 | hsa-miR-4487    | HIF1A |
| SNAI2 | hsa-miR-6872-3p | STAT3 |
| SNAI2 | hsa-miR-6875-3p | STAT3 |
| SNAI2 | hsa-miR-1234-3p | STAT3 |
| SNAI2 | hsa-miR-106b-5p | STAT3 |
| SNAI2 | hsa-miR-106b-5p | HIF1A |
| SOX2  | hsa-miR-9-5p    | NFKB1 |
| SOX2  | hsa-miR-3165    | TP53  |
| SOX2  | hsa-miR-4720-3p | STAT3 |
| SOX2  | hsa-miR-7113-5p | STAT3 |
| SOX2  | hsa-miR-210-3p  | NFKB1 |
| SOX2  | hsa-miR-210-3p  | HIF1A |
| SOX2  | hsa-miR-153-5p  | HIF1A |
| SOX2  | hsa-miR-5094    | HIF1A |
| SOX2  | hsa-miR-6755-5p | HIF1A |
| SOX2  | hsa-miR-519c-3p | HIF1A |
| SOX2  | hsa-miR-16-5p   | NFKB1 |
| SOX2  | hsa-miR-16-5p   | TP53  |
| SOX2  | hsa-miR-16-5p   | SMAD3 |
| SOX2  | hsa-miR-15b-5p  | SMAD3 |
| SOX2  | hsa-miR-513b-3p | TP53  |
| SOX2  | hsa-miR-6760-5p | TP53  |
| SOX2  | hsa-miR-4470    | HIF1A |
| SOX2  | hsa-miR-146a-5p | NFKB1 |
| SOX2  | hsa-miR-484     | IL2   |
| SOX2  | hsa-miR-3128    | HIF1A |
| SOX2  | hsa-miR-4531    | TP53  |
| SOX2  | hsa-miR-5702    | TP53  |
| SOX2  | hsa-miR-874-3p  | STAT3 |
| SOX2  | hsa-miR-3160-3p | HIF1A |
| SOX2  | hsa-let-7a-5p   | NFKB1 |

|      |                  |       |
|------|------------------|-------|
| SOX2 | hsa-miR-181a-5p  | STAT3 |
| SOX2 | hsa-miR-4684-5p  | STAT3 |
| SOX2 | hsa-miR-6789-3p  | STAT3 |
| SOX2 | hsa-miR-1322     | HIF1A |
| SOX2 | hsa-miR-4487     | HIF1A |
| SOX2 | hsa-miR-6875-3p  | STAT3 |
| SOX2 | hsa-miR-124-3p   | STAT3 |
| SOX2 | hsa-miR-1234-3p  | STAT3 |
| SOX2 | hsa-miR-7158-5p  | STAT3 |
| SP1  | hsa-miR-203a-3p  | TNF   |
| SP1  | hsa-miR-210-3p   | NFKB1 |
| SP1  | hsa-miR-210-3p   | HIF1A |
| SP1  | hsa-miR-130b-3p  | STAT3 |
| SP1  | hsa-miR-149-3p   | TP53  |
| SP1  | hsa-miR-4470     | HIF1A |
| SP1  | hsa-miR-26b-5p   | NFKB1 |
| SP1  | hsa-miR-26b-5p   | PTGS2 |
| SP1  | hsa-miR-6845-3p  | STAT3 |
| SP1  | hsa-miR-6807-3p  | HIF1A |
| SP1  | hsa-miR-4487     | HIF1A |
| SP1  | hsa-miR-92b-3p   | SMAD3 |
| SP1  | hsa-miR-199b-5p  | HIF1A |
| SP1  | hsa-miR-101-3p   | PTGS2 |
| SP1  | hsa-miR-18a-3p   | SMAD3 |
| SP1  | hsa-miR-4799-5p  | HIF1A |
| SP1  | hsa-miR-365a-5p  | STAT3 |
| SP1  | hsa-miR-6511a-5p | HIF1A |
| SP1  | hsa-miR-93-5p    | TGFB1 |
| SP1  | hsa-miR-93-5p    | STAT3 |
| SP1  | hsa-miR-93-5p    | HIF1A |
| SP1  | hsa-miR-5702     | TP53  |
| SP1  | hsa-miR-137      | PTGS2 |
| SP1  | hsa-miR-8071     | TP53  |
| SP1  | hsa-miR-6893-5p  | HIF1A |
| SP1  | hsa-miR-663a     | TGFB1 |
| SP1  | hsa-miR-589-5p   | PTGS2 |

|     |                 |       |
|-----|-----------------|-------|
| SP1 | hsa-miR-940     | HIF1A |
| SP1 | hsa-miR-6789-3p | STAT3 |
| SP1 | hsa-miR-6872-3p | STAT3 |
| SP1 | hsa-miR-6875-3p | STAT3 |
| SP1 | hsa-miR-200a-3p | TP53  |
| SP1 | hsa-miR-200a-3p | SMAD3 |
| SP1 | hsa-miR-320a    | PTGS2 |
| SP1 | hsa-miR-18a-5p  | TP53  |
| SP1 | hsa-miR-18a-5p  | HIF1A |
| SP1 | hsa-miR-18a-5p  | SMAD3 |
| SP1 | hsa-miR-9-5p    | NFKB1 |
| SP1 | hsa-miR-625-3p  | HIF1A |
| SP1 | hsa-miR-1908-5p | PTGS2 |
| SP1 | hsa-miR-5193    | TP53  |
| SP1 | hsa-miR-6809-3p | STAT3 |
| SP1 | hsa-miR-6808-5p | HIF1A |
| SP1 | hsa-miR-935     | HIF1A |
| SP1 | hsa-miR-19a-3p  | TNF   |
| SP1 | hsa-miR-19a-3p  | TP53  |
| SP1 | hsa-miR-2682-5p | HIF1A |
| SP1 | hsa-miR-4531    | TP53  |
| SP1 | hsa-miR-132-3p  | PTGS2 |
| SP1 | hsa-miR-6815-3p | HIF1A |
| SP1 | hsa-miR-17-5p   | TGFB1 |
| SP1 | hsa-miR-17-5p   | PTGS2 |
| SP1 | hsa-miR-17-5p   | HIF1A |
| SP1 | hsa-miR-17-5p   | SMAD3 |
| SP1 | hsa-miR-17-5p   | TP53  |
| SP1 | hsa-miR-1181    | STAT3 |
| SP1 | hsa-miR-100-5p  | PTGS2 |
| SP1 | hsa-let-7e-5p   | STAT3 |
| SP1 | hsa-miR-6760-5p | TP53  |
| SP1 | hsa-miR-193b-3p | SMAD3 |
| SP1 | hsa-miR-3165    | TP53  |
| SP1 | hsa-miR-24-3p   | TGFB1 |
| SP1 | hsa-miR-4516    | STAT3 |

|       |                 |       |
|-------|-----------------|-------|
| SP1   | hsa-miR-4516    | TP53  |
| SP1   | hsa-miR-449c-5p | HIF1A |
| SP1   | hsa-miR-6807-5p | STAT3 |
| SP1   | hsa-miR-1233-5p | TP53  |
| SP1   | hsa-miR-20a-5p  | TP53  |
| SP1   | hsa-miR-20a-5p  | HIF1A |
| SP2   | hsa-miR-210-3p  | HIF1A |
| SP4   | hsa-miR-6872-3p | STAT3 |
| SP4   | hsa-miR-124-3p  | STAT3 |
| SPDEF | hsa-miR-3934-5p | PTGS2 |
| SPDEF | hsa-miR-379-3p  | PTGS2 |
| SPDEF | hsa-miR-125a-5p | TP53  |
| SPDEF | hsa-miR-877-3p  | STAT3 |
| SPDEF | hsa-miR-149-3p  | TP53  |
| SPDEF | hsa-miR-296-3p  | PTGS2 |
| SPDEF | hsa-miR-22-3p   | HIF1A |
| SPDEF | hsa-miR-6722-3p | TP53  |
| SPDEF | hsa-miR-324-3p  | TGFB1 |
| SPDEF | hsa-miR-26b-5p  | NFKB1 |
| SPDEF | hsa-miR-26b-5p  | PTGS2 |
| SPDEF | hsa-miR-199a-3p | PTGS2 |
| SPDEF | hsa-miR-7151-3p | STAT3 |
| SPDEF | hsa-miR-5681a   | STAT3 |
| SPDEF | hsa-miR-144-3p  | TGFB1 |
| SPDEF | hsa-miR-5681b   | HIF1A |
| SPDEF | hsa-miR-6807-3p | HIF1A |
| SPDEF | hsa-miR-10b-5p  | TP53  |
| SPDEF | hsa-miR-7113-5p | STAT3 |
| SPDEF | hsa-miR-124-3p  | PTGS2 |
| SPDEF | hsa-miR-124-3p  | STAT3 |
| SPDEF | hsa-miR-1234-3p | STAT3 |
| SPDEF | hsa-miR-5003-5p | TP53  |
| SPDEF | hsa-miR-889-3p  | HIF1A |
| SPDEF | hsa-miR-4685-5p | STAT3 |
| SPDEF | hsa-miR-6754-5p | STAT3 |
| SPDEF | hsa-miR-33a-5p  | HIF1A |

|       |                  |       |
|-------|------------------|-------|
| SPDEF | hsa-miR-24-3p    | TGFB1 |
| SPDEF | hsa-miR-6871-3p  | STAT3 |
| SPDEF | hsa-miR-187-3p   | TNF   |
| SPDEF | hsa-miR-6893-5p  | HIF1A |
| SPDEF | hsa-miR-337-3p   | STAT3 |
| SPDEF | hsa-miR-146b-5p  | NFKB1 |
| SPDEF | hsa-miR-589-5p   | PTGS2 |
| SPDEF | hsa-miR-940      | HIF1A |
| SPDEF | hsa-miR-329-5p   | HIF1A |
| SPDEF | hsa-miR-203a-3p  | TNF   |
| SPDEF | hsa-miR-935      | HIF1A |
| SPDEF | hsa-miR-6809-3p  | STAT3 |
| SPDEF | hsa-miR-6806-5p  | HIF1A |
| SPDEF | hsa-miR-5197-5p  | TP53  |
| SPDEF | hsa-miR-3074-3p  | HIF1A |
| SPDEF | hsa-miR-618      | STAT3 |
| SPDEF | hsa-miR-922      | STAT3 |
| SPDEF | hsa-miR-3668     | HIF1A |
| SPDEF | hsa-miR-138-5p   | HIF1A |
| SPDEF | hsa-miR-424-5p   | HIF1A |
| SPDEF | hsa-miR-9-5p     | NFKB1 |
| SPDEF | hsa-miR-138-2-3p | STAT3 |
| SPDEF | hsa-let-7e-5p    | STAT3 |
| SPDEF | hsa-miR-195-5p   | SMAD3 |
| SPDEF | hsa-miR-193b-3p  | SMAD3 |
| SPDEF | hsa-miR-199a-5p  | PTGS2 |
| SPDEF | hsa-miR-199a-5p  | HIF1A |
| SPDEF | hsa-miR-199a-5p  | NFKB1 |
| SPDEF | hsa-miR-145-5p   | SMAD3 |
| SPDEF | hsa-miR-449c-5p  | HIF1A |
| SPDEF | hsa-miR-6807-5p  | STAT3 |
| SPDEF | hsa-miR-299-5p   | HIF1A |
| SPI1  | hsa-miR-132-3p   | PTGS2 |
| SPI1  | hsa-miR-139-5p   | NFKB1 |
| SPI1  | hsa-miR-4778-3p  | STAT3 |
| SPI1  | hsa-miR-2682-5p  | HIF1A |

|      |                  |       |
|------|------------------|-------|
| SPI1 | hsa-miR-4282     | HIF1A |
| SPI1 | hsa-miR-663a     | TGFB1 |
| SPI1 | hsa-miR-942-5p   | TLR4  |
| SPI1 | hsa-miR-143-3p   | PTGS2 |
| SPI1 | hsa-miR-143-3p   | TNF   |
| SPI1 | hsa-miR-143-3p   | SMAD3 |
| SPI1 | hsa-miR-214-3p   | TP53  |
| SPI1 | hsa-miR-15b-5p   | SMAD3 |
| SPI1 | hsa-miR-150-5p   | TP53  |
| SPI1 | hsa-miR-24-3p    | TGFB1 |
| SPI1 | hsa-miR-6760-5p  | TP53  |
| SPI1 | hsa-miR-7-5p     | TLR4  |
| SPI1 | hsa-miR-4470     | HIF1A |
| SPI1 | hsa-miR-484      | IL2   |
| SPI1 | hsa-miR-16-5p    | PTGS2 |
| SPI1 | hsa-miR-16-5p    | TP53  |
| SPI1 | hsa-miR-16-5p    | NFKB1 |
| SPI1 | hsa-miR-16-5p    | SMAD3 |
| SPI1 | hsa-miR-1296-3p  | TP53  |
| SPI1 | hsa-miR-4738-3p  | TLR4  |
| SPI1 | hsa-miR-4659a-3p | TLR4  |
| SPI1 | hsa-miR-4531     | TP53  |
| SPI1 | hsa-miR-5702     | TP53  |
| SPI1 | hsa-miR-223-3p   | TP53  |
| SPI1 | hsa-miR-4698     | TLR4  |
| SPI1 | hsa-miR-6815-3p  | HIF1A |
| SPI1 | hsa-miR-137      | PTGS2 |
| SPI1 | hsa-miR-3160-3p  | HIF1A |
| SPI1 | hsa-miR-145-5p   | SMAD3 |
| SPI1 | hsa-miR-138-2-3p | STAT3 |
| SPI1 | hsa-miR-5193     | TP53  |
| SPI1 | hsa-let-7a-5p    | PTGS2 |
| SPI1 | hsa-let-7a-5p    | NFKB1 |
| SPI1 | hsa-miR-146a-5p  | PTGS2 |
| SPI1 | hsa-miR-146a-5p  | TLR4  |
| SPI1 | hsa-miR-146a-5p  | NFKB1 |



|        |                  |       |
|--------|------------------|-------|
| SPI1   | hsa-miR-1-3p     | TLR4  |
| SPI1   | hsa-miR-589-5p   | PTGS2 |
| SPI1   | hsa-miR-128-3p   | PTGS2 |
| SPI1   | hsa-let-7i-5p    | TLR4  |
| SPI1   | hsa-miR-320a     | PTGS2 |
| SPI1   | hsa-miR-618      | STAT3 |
| SPI1   | hsa-miR-4487     | HIF1A |
| SPI1   | hsa-miR-4659b-3p | TLR4  |
| SPI1   | hsa-miR-124-3p   | PTGS2 |
| SPI1   | hsa-miR-124-3p   | STAT3 |
| SPI1   | hsa-miR-138-5p   | HIF1A |
| SPI1   | hsa-miR-3662     | HIF1A |
| SPI1   | hsa-miR-1181     | STAT3 |
| SPI1   | hsa-miR-101-3p   | PTGS2 |
| SPI1   | hsa-miR-4748     | HIF1A |
| SPIB   | hsa-miR-19b-3p   | TP53  |
| SPIB   | hsa-let-7a-5p    | NFKB1 |
| SPIB   | hsa-miR-92a-1-5p | TP53  |
| SPIB   | hsa-miR-4698     | TLR4  |
| SPIB   | hsa-miR-92a-3p   | NFKB1 |
| SPIB   | hsa-miR-4725-3p  | TP53  |
| SREBF1 | hsa-miR-210-3p   | HIF1A |
| SREBF1 | hsa-miR-1908-5p  | PTGS2 |
| SRF    | hsa-miR-132-3p   | PTGS2 |
| SRF    | hsa-miR-24-3p    | TGFB1 |
| SRF    | hsa-miR-210-3p   | NFKB1 |
| SRF    | hsa-miR-210-3p   | HIF1A |
| SRF    | hsa-miR-4650-5p  | TP53  |
| SRF    | hsa-miR-153-5p   | HIF1A |
| SRF    | hsa-let-7a-5p    | IL6   |
| SRF    | hsa-let-7a-5p    | PTGS2 |
| SRF    | hsa-let-7a-5p    | NFKB1 |
| SRF    | hsa-miR-365a-5p  | STAT3 |
| SRF    | hsa-miR-7110-3p  | STAT3 |
| SRF    | hsa-let-7b-5p    | PTGS2 |
| SRF    | hsa-let-7b-5p    | HIF1A |

|     |                  |       |
|-----|------------------|-------|
| SRF | hsa-miR-6809-3p  | STAT3 |
| SRF | hsa-miR-6808-5p  | HIF1A |
| SRF | hsa-miR-143-3p   | PTGS2 |
| SRF | hsa-miR-143-3p   | TNF   |
| SRF | hsa-miR-143-3p   | SMAD3 |
| SRF | hsa-miR-203a-3p  | IL6   |
| SRF | hsa-miR-203a-3p  | TNF   |
| SRF | hsa-miR-22-3p    | HIF1A |
| SRF | hsa-miR-6760-5p  | TP53  |
| SRF | hsa-miR-193b-3p  | SMAD3 |
| SRF | hsa-miR-4470     | HIF1A |
| SRF | hsa-miR-365a-3p  | IL6   |
| SRF | hsa-miR-935      | HIF1A |
| SRF | hsa-miR-34b-5p   | HIF1A |
| SRF | hsa-miR-6511a-5p | HIF1A |
| SRF | hsa-miR-6845-3p  | STAT3 |
| SRF | hsa-miR-1908-5p  | PTGS2 |
| SRF | hsa-miR-6789-3p  | STAT3 |
| SRF | hsa-miR-4531     | TP53  |
| SRF | hsa-miR-223-3p   | IL6   |
| SRF | hsa-miR-223-3p   | TP53  |
| SRF | hsa-miR-6815-3p  | HIF1A |
| SRF | hsa-miR-211-5p   | TGFB1 |
| SRF | hsa-miR-199a-5p  | PTGS2 |
| SRF | hsa-miR-199a-5p  | HIF1A |
| SRF | hsa-miR-199a-5p  | NFKB1 |
| SRF | hsa-miR-128-3p   | PTGS2 |
| SRF | hsa-miR-149-5p   | IL6   |
| SRF | hsa-miR-145-5p   | SMAD3 |
| SRF | hsa-miR-449c-5p  | HIF1A |
| SRF | hsa-miR-3529-3p  | TP53  |
| SRF | hsa-miR-3529-3p  | SMAD3 |
| SRF | hsa-miR-199a-3p  | PTGS2 |
| SRF | hsa-miR-663a     | TGFB1 |
| SRF | hsa-miR-149-3p   | TP53  |
| SRF | hsa-miR-589-5p   | PTGS2 |

|       |                 |       |
|-------|-----------------|-------|
| SRF   | hsa-miR-144-3p  | TGFB1 |
| SRF   | hsa-miR-6875-3p | STAT3 |
| SRF   | hsa-miR-1322    | HIF1A |
| SRF   | hsa-miR-4487    | HIF1A |
| SRF   | hsa-miR-92b-3p  | SMAD3 |
| SRF   | hsa-miR-3662    | HIF1A |
| SRF   | hsa-miR-138-5p  | HIF1A |
| SRF   | hsa-miR-124-3p  | IL6   |
| SRF   | hsa-miR-124-3p  | PTGS2 |
| SRF   | hsa-miR-124-3p  | STAT3 |
| SRF   | hsa-miR-1181    | STAT3 |
| SRF   | hsa-miR-6872-3p | STAT3 |
| SRF   | hsa-miR-130a-3p | TGFB1 |
| SRF   | hsa-miR-130a-3p | TNF   |
| SRF   | hsa-miR-3121-3p | HIF1A |
| STAT1 | hsa-miR-18a-5p  | TP53  |
| STAT1 | hsa-miR-18a-5p  | HIF1A |
| STAT1 | hsa-miR-4720-3p | STAT3 |
| STAT1 | hsa-miR-210-3p  | NFKB1 |
| STAT1 | hsa-miR-210-3p  | HIF1A |
| STAT1 | hsa-miR-1908-5p | PTGS2 |
| STAT1 | hsa-miR-365a-5p | STAT3 |
| STAT1 | hsa-miR-7110-3p | STAT3 |
| STAT1 | hsa-miR-942-5p  | TLR4  |
| STAT1 | hsa-miR-130a-3p | TGFB1 |
| STAT1 | hsa-miR-130a-3p | TNF   |
| STAT1 | hsa-miR-7-5p    | TLR4  |
| STAT1 | hsa-miR-22-3p   | HIF1A |
| STAT1 | hsa-miR-5197-5p | TP53  |
| STAT1 | hsa-miR-4470    | HIF1A |
| STAT1 | hsa-miR-365a-3p | IL6   |
| STAT1 | hsa-miR-19a-3p  | TNF   |
| STAT1 | hsa-miR-19a-3p  | TP53  |
| STAT1 | hsa-miR-24-3p   | TGFB1 |
| STAT1 | hsa-miR-4531    | TP53  |
| STAT1 | hsa-miR-132-3p  | PTGS2 |

|       |                 |       |
|-------|-----------------|-------|
| STAT1 | hsa-miR-1322    | HIF1A |
| STAT1 | hsa-miR-21-5p   | TGFB1 |
| STAT1 | hsa-miR-21-5p   | TLR4  |
| STAT1 | hsa-miR-21-5p   | HIF1A |
| STAT1 | hsa-miR-21-5p   | NFKB1 |
| STAT1 | hsa-miR-6815-3p | HIF1A |
| STAT1 | hsa-miR-138-5p  | HIF1A |
| STAT1 | hsa-miR-449c-5p | HIF1A |
| STAT1 | hsa-miR-5193    | TP53  |
| STAT1 | hsa-miR-30e-5p  | TP53  |
| STAT1 | hsa-miR-17-5p   | PTGS2 |
| STAT1 | hsa-miR-17-5p   | TP53  |
| STAT1 | hsa-miR-17-5p   | HIF1A |
| STAT1 | hsa-miR-17-5p   | TGFB1 |
| STAT1 | hsa-miR-663a    | TGFB1 |
| STAT1 | hsa-miR-6872-3p | STAT3 |
| STAT1 | hsa-miR-589-5p  | PTGS2 |
| STAT1 | hsa-miR-128-3p  | PTGS2 |
| STAT1 | hsa-miR-9-5p    | NFKB1 |
| STAT1 | hsa-miR-4487    | HIF1A |
| STAT1 | hsa-miR-124-3p  | IL6   |
| STAT1 | hsa-miR-124-3p  | PTGS2 |
| STAT1 | hsa-miR-124-3p  | STAT3 |
| STAT1 | hsa-miR-4279    | TLR4  |
| STAT1 | hsa-miR-20a-5p  | TP53  |
| STAT1 | hsa-miR-20a-5p  | HIF1A |
| STAT1 | hsa-miR-1181    | STAT3 |
| STAT1 | hsa-miR-155-5p  | IL6   |
| STAT1 | hsa-miR-155-5p  | NFKB1 |
| STAT2 | hsa-miR-18a-5p  | TP53  |
| STAT2 | hsa-miR-106b-5p | STAT3 |
| STAT2 | hsa-miR-150-5p  | TP53  |
| STAT2 | hsa-miR-20a-5p  | TP53  |
| STAT2 | hsa-miR-19a-3p  | TP53  |
| STAT2 | hsa-miR-17-5p   | TP53  |
| STAT2 | hsa-miR-93-5p   | STAT3 |

|        |                 |       |
|--------|-----------------|-------|
| STAT3  | hsa-miR-558     | PTGS2 |
| STAT3  | hsa-miR-3934-5p | PTGS2 |
| STAT3  | hsa-miR-210-3p  | NFKB1 |
| STAT3  | hsa-miR-199a-3p | PTGS2 |
| STAT3  | hsa-miR-942-5p  | TLR4  |
| STAT3  | hsa-miR-101-3p  | PTGS2 |
| STAT3  | hsa-miR-99a-5p  | PTGS2 |
| STAT3  | hsa-miR-7-5p    | TLR4  |
| STAT3  | hsa-miR-4738-3p | TLR4  |
| STAT3  | hsa-miR-137     | PTGS2 |
| STAT3  | hsa-miR-320a    | PTGS2 |
| STAT3  | hsa-miR-4694-3p | TLR4  |
| STAT3  | hsa-miR-1908-5p | PTGS2 |
| STAT3  | hsa-miR-16-5p   | PTGS2 |
| STAT3  | hsa-miR-16-5p   | NFKB1 |
| STAT3  | hsa-miR-19a-3p  | TNF   |
| STAT3  | hsa-miR-4742-3p | TLR4  |
| STAT3  | hsa-miR-142-3p  | IL6   |
| STAT3  | hsa-miR-132-3p  | PTGS2 |
| STAT3  | hsa-let-7a-5p   | IL6   |
| STAT3  | hsa-let-7a-5p   | PTGS2 |
| STAT3  | hsa-let-7a-5p   | NFKB1 |
| STAT3  | hsa-miR-4279    | TLR4  |
| STAT3  | hsa-miR-9-5p    | NFKB1 |
| STAT3  | hsa-miR-4698    | TLR4  |
| STAT3  | hsa-miR-130a-3p | TNF   |
| STAT3  | hsa-miR-199a-5p | PTGS2 |
| STAT3  | hsa-miR-199a-5p | NFKB1 |
| STAT3  | hsa-miR-128-3p  | PTGS2 |
| STAT3  | hsa-miR-107     | IL6   |
| STAT4  | hsa-miR-210-3p  | NFKB1 |
| STAT5A | hsa-miR-18a-5p  | TP53  |
| STAT5A | hsa-miR-18a-5p  | HIF1A |
| STAT5A | hsa-miR-9-5p    | NFKB1 |
| STAT5A | hsa-miR-130b-3p | STAT3 |
| STAT5A | hsa-miR-146a-5p | NFKB1 |

|        |                  |       |
|--------|------------------|-------|
| STAT5A | hsa-miR-19a-3p   | TNF   |
| STAT5A | hsa-miR-19a-3p   | TP53  |
| STAT5A | hsa-miR-92a-3p   | NFKB1 |
| STAT5A | hsa-miR-19b-3p   | TGFB1 |
| STAT5A | hsa-miR-19b-3p   | TP53  |
| STAT5A | hsa-miR-17-5p    | TGFB1 |
| STAT5A | hsa-miR-17-5p    | TP53  |
| STAT5A | hsa-miR-17-5p    | HIF1A |
| STAT5A | hsa-miR-6760-5p  | TP53  |
| STAT5A | hsa-miR-4487     | HIF1A |
| STAT5A | hsa-miR-20a-5p   | TP53  |
| STAT5A | hsa-miR-20a-5p   | HIF1A |
| STAT5A | hsa-miR-4441     | STAT3 |
| STAT5A | hsa-miR-92a-1-5p | TP53  |
| T      | hsa-miR-1181     | STAT3 |
| T      | hsa-miR-15a-5p   | SMAD3 |
| T      | hsa-miR-6872-3p  | STAT3 |
| T      | hsa-miR-124-3p   | STAT3 |
| T      | hsa-miR-3668     | HIF1A |
| T      | hsa-miR-449c-5p  | HIF1A |
| T      | hsa-miR-34b-5p   | HIF1A |
| T      | hsa-miR-335-5p   | SMAD3 |
| T      | hsa-miR-4778-3p  | STAT3 |
| TAL1   | hsa-miR-889-3p   | HIF1A |
| TAL1   | hsa-miR-3934-5p  | PTGS2 |
| TAL1   | hsa-miR-625-3p   | HIF1A |
| TAL1   | hsa-let-7a-5p    | IL6   |
| TAL1   | hsa-let-7a-5p    | PTGS2 |
| TAL1   | hsa-let-7a-5p    | NFKB1 |
| TAL1   | hsa-miR-4487     | HIF1A |
| TAL1   | hsa-miR-214-3p   | TP53  |
| TAL1   | hsa-miR-26a-5p   | IL6   |
| TAL1   | hsa-miR-142-3p   | IL6   |
| TAL1   | hsa-miR-93-5p    | TGFB1 |
| TAL1   | hsa-miR-93-5p    | STAT3 |
| TAL1   | hsa-miR-93-5p    | HIF1A |

|      |                 |       |
|------|-----------------|-------|
| TAL1 | hsa-miR-21-5p   | TGFB1 |
| TAL1 | hsa-miR-21-5p   | HIF1A |
| TAL1 | hsa-miR-21-5p   | NFKB1 |
| TAL1 | hsa-miR-1908-5p | PTGS2 |
| TAL1 | hsa-miR-6893-5p | HIF1A |
| TAL1 | hsa-miR-1910-3p | HIF1A |
| TAL1 | hsa-miR-5193    | TP53  |
| TAL1 | hsa-miR-324-3p  | TGFB1 |
| TAL1 | hsa-miR-663a    | TGFB1 |
| TAL1 | hsa-let-7b-5p   | PTGS2 |
| TAL1 | hsa-let-7b-5p   | HIF1A |
| TAL1 | hsa-miR-144-3p  | TGFB1 |
| TAL1 | hsa-miR-6807-3p | HIF1A |
| TAL1 | hsa-miR-4271    | TP53  |
| TAL1 | hsa-miR-106b-5p | STAT3 |
| TAL1 | hsa-miR-106b-5p | HIF1A |
| TAL1 | hsa-miR-106b-3p | HIF1A |
| TAL1 | hsa-miR-101-3p  | PTGS2 |
| TAL1 | hsa-miR-633     | TGFB1 |
| TAL1 | hsa-miR-151a-3p | HIF1A |
| TBP  | hsa-miR-9-5p    | NFKB1 |
| TBP  | hsa-miR-149-5p  | IL6   |
| TBP  | hsa-miR-130b-3p | STAT3 |
| TBP  | hsa-miR-6809-3p | STAT3 |
| TBP  | hsa-miR-34b-5p  | HIF1A |
| TBP  | hsa-miR-143-3p  | PTGS2 |
| TBP  | hsa-miR-143-3p  | TNF   |
| TBP  | hsa-miR-143-3p  | SMAD3 |
| TBP  | hsa-miR-149-3p  | TP53  |
| TBP  | hsa-miR-199b-5p | HIF1A |
| TBP  | hsa-miR-22-3p   | HIF1A |
| TBP  | hsa-miR-193b-3p | SMAD3 |
| TBP  | hsa-miR-4470    | HIF1A |
| TBP  | hsa-miR-3165    | TP53  |
| TBP  | hsa-miR-935     | HIF1A |
| TBP  | hsa-miR-371b-3p | STAT3 |

|       |                  |       |
|-------|------------------|-------|
| TBP   | hsa-miR-6815-3p  | HIF1A |
| TBP   | hsa-miR-1468-3p  | TLR4  |
| TBP   | hsa-miR-145-5p   | SMAD3 |
| TBP   | hsa-miR-1322     | HIF1A |
| TBP   | hsa-miR-618      | STAT3 |
| TBP   | hsa-miR-124-3p   | IL6   |
| TBP   | hsa-miR-124-3p   | PTGS2 |
| TBP   | hsa-miR-124-3p   | STAT3 |
| TBP   | hsa-miR-1181     | STAT3 |
| TBP   | hsa-miR-155-5p   | IL6   |
| TBP   | hsa-miR-155-5p   | NFKB1 |
| TBP   | hsa-miR-155-5p   | SMAD3 |
| TBP   | hsa-miR-130a-3p  | TGFB1 |
| TBP   | hsa-miR-130a-3p  | TNF   |
| TCF12 | hsa-miR-132-3p   | PTGS2 |
| TCF12 | hsa-miR-3934-5p  | PTGS2 |
| TCF12 | hsa-miR-4799-5p  | HIF1A |
| TCF12 | hsa-miR-365a-3p  | IL6   |
| TCF12 | hsa-miR-4282     | HIF1A |
| TCF12 | hsa-miR-6760-5p  | TP53  |
| TCF12 | hsa-miR-6809-3p  | STAT3 |
| TCF12 | hsa-miR-203a-3p  | IL6   |
| TCF12 | hsa-miR-203a-3p  | TNF   |
| TCF12 | hsa-miR-199a-5p  | PTGS2 |
| TCF12 | hsa-miR-199a-5p  | HIF1A |
| TCF12 | hsa-miR-199a-5p  | NFKB1 |
| TCF12 | hsa-miR-150-5p   | TP53  |
| TCF12 | hsa-miR-24-3p    | TGFB1 |
| TCF12 | hsa-miR-22-3p    | HIF1A |
| TCF12 | hsa-miR-193b-3p  | SMAD3 |
| TCF12 | hsa-miR-4470     | HIF1A |
| TCF12 | hsa-miR-199a-3p  | PTGS2 |
| TCF12 | hsa-miR-3165     | TP53  |
| TCF12 | hsa-miR-6789-3p  | STAT3 |
| TCF12 | hsa-miR-6511a-5p | HIF1A |
| TCF12 | hsa-miR-142-3p   | IL6   |



|       |                 |       |
|-------|-----------------|-------|
| TCF12 | hsa-miR-106b-5p | STAT3 |
| TCF12 | hsa-miR-106b-5p | HIF1A |
| TCF12 | hsa-miR-2682-5p | HIF1A |
| TCF12 | hsa-miR-146b-5p | NFKB1 |
| TCF12 | hsa-miR-106b-3p | HIF1A |
| TCF12 | hsa-miR-93-5p   | TGFB1 |
| TCF12 | hsa-miR-93-5p   | STAT3 |
| TCF12 | hsa-miR-93-5p   | HIF1A |
| TCF12 | hsa-miR-4516    | STAT3 |
| TCF12 | hsa-miR-4516    | TP53  |
| TCF12 | hsa-miR-4531    | TP53  |
| TCF12 | hsa-miR-21-5p   | TGFB1 |
| TCF12 | hsa-miR-21-5p   | HIF1A |
| TCF12 | hsa-miR-21-5p   | NFKB1 |
| TCF12 | hsa-miR-1908-5p | PTGS2 |
| TCF12 | hsa-miR-137     | PTGS2 |
| TCF12 | hsa-miR-320a    | PTGS2 |
| TCF12 | hsa-miR-149-5p  | IL6   |
| TCF12 | hsa-miR-3074-3p | HIF1A |
| TCF12 | hsa-let-7a-5p   | IL6   |
| TCF12 | hsa-let-7a-5p   | PTGS2 |
| TCF12 | hsa-let-7a-5p   | NFKB1 |
| TCF12 | hsa-miR-449c-5p | HIF1A |
| TCF12 | hsa-miR-138-5p  | HIF1A |
| TCF12 | hsa-miR-324-3p  | TGFB1 |
| TCF12 | hsa-miR-663a    | TGFB1 |
| TCF12 | hsa-miR-6872-3p | STAT3 |
| TCF12 | hsa-miR-149-3p  | TP53  |
| TCF12 | hsa-miR-589-5p  | PTGS2 |
| TCF12 | hsa-miR-605-5p  | TP53  |
| TCF12 | hsa-miR-6875-3p | STAT3 |
| TCF12 | hsa-miR-9-5p    | NFKB1 |
| TCF12 | hsa-miR-128-3p  | PTGS2 |
| TCF12 | hsa-miR-92b-3p  | SMAD3 |
| TCF12 | hsa-miR-130b-3p | STAT3 |
| TCF12 | hsa-miR-124-3p  | IL6   |

|       |                  |       |
|-------|------------------|-------|
| TCF12 | hsa-miR-124-3p   | PTGS2 |
| TCF12 | hsa-miR-124-3p   | STAT3 |
| TCF12 | hsa-miR-3668     | HIF1A |
| TCF12 | hsa-miR-1181     | STAT3 |
| TCF12 | hsa-miR-365a-5p  | STAT3 |
| TCF21 | hsa-miR-22-3p    | HIF1A |
| TCF21 | hsa-miR-199b-5p  | HIF1A |
| TCF21 | hsa-miR-155-5p   | NFKB1 |
| TCF21 | hsa-miR-100-5p   | PTGS2 |
| TCF3  | hsa-miR-365a-5p  | STAT3 |
| TCF3  | hsa-miR-5692a    | HIF1A |
| TCF3  | hsa-miR-6511a-5p | HIF1A |
| TCF3  | hsa-miR-4418     | HIF1A |
| TCF3  | hsa-miR-4516     | STAT3 |
| TCF3  | hsa-miR-4516     | TP53  |
| TCF3  | hsa-miR-4531     | TP53  |
| TCF3  | hsa-miR-21-5p    | TGFB1 |
| TCF3  | hsa-miR-21-5p    | HIF1A |
| TCF3  | hsa-miR-21-5p    | NFKB1 |
| TCF3  | hsa-miR-6815-3p  | HIF1A |
| TCF3  | hsa-miR-6789-3p  | STAT3 |
| TCF3  | hsa-miR-4487     | HIF1A |
| TCF3  | hsa-miR-6875-3p  | STAT3 |
| TCF3  | hsa-miR-3662     | HIF1A |
| TCF3  | hsa-miR-1181     | STAT3 |
| TCF3  | hsa-miR-155-5p   | NFKB1 |
| TCF3  | hsa-miR-107      | HIF1A |
| TCF4  | hsa-miR-4799-5p  | HIF1A |
| TCF4  | hsa-miR-6809-3p  | STAT3 |
| TCF4  | hsa-miR-22-3p    | HIF1A |
| TCF4  | hsa-miR-3165     | TP53  |
| TCF4  | hsa-miR-24-3p    | TGFB1 |
| TCF4  | hsa-miR-324-3p   | TGFB1 |
| TCF4  | hsa-miR-3074-3p  | HIF1A |
| TCF4  | hsa-miR-4748     | HIF1A |
| TCF4  | hsa-miR-6760-5p  | TP53  |

|        |                 |       |
|--------|-----------------|-------|
| TCF4   | hsa-miR-124-3p  | STAT3 |
| TCF4   | hsa-miR-199b-5p | HIF1A |
| TCF4   | hsa-miR-335-5p  | SMAD3 |
| TCF7L2 | hsa-miR-210-3p  | NFKB1 |
| TCF7L2 | hsa-miR-210-3p  | HIF1A |
| TCF7L2 | hsa-miR-4799-5p | HIF1A |
| TCF7L2 | hsa-miR-1908-5p | PTGS2 |
| TCF7L2 | hsa-let-7a-5p   | PTGS2 |
| TCF7L2 | hsa-let-7a-5p   | NFKB1 |
| TCF7L2 | hsa-miR-100-5p  | PTGS2 |
| TCF7L2 | hsa-miR-24-3p   | TGFB1 |
| TCF7L2 | hsa-miR-4470    | HIF1A |
| TCF7L2 | hsa-miR-3165    | TP53  |
| TCF7L2 | hsa-miR-935     | HIF1A |
| TCF7L2 | hsa-miR-5702    | TP53  |
| TCF7L2 | hsa-miR-9-5p    | NFKB1 |
| TCF7L2 | hsa-miR-145-5p  | SMAD3 |
| TCF7L2 | hsa-miR-663a    | TGFB1 |
| TCF7L2 | hsa-miR-6760-5p | TP53  |
| TCF7L2 | hsa-miR-6789-3p | STAT3 |
| TCF7L2 | hsa-miR-128-3p  | PTGS2 |
| TCF7L2 | hsa-miR-92b-3p  | SMAD3 |
| TCF7L2 | hsa-miR-365a-5p | STAT3 |
| TCF7L2 | hsa-miR-320a    | PTGS2 |
| TEAD2  | hsa-miR-935     | HIF1A |
| TEAD2  | hsa-let-7a-5p   | PTGS2 |
| TEAD4  | hsa-miR-1178-3p | STAT3 |
| TEAD4  | hsa-miR-26a-5p  | IL6   |
| TEAD4  | hsa-miR-203a-3p | IL6   |
| TEAD4  | hsa-miR-199a-3p | PTGS2 |
| TEAD4  | hsa-miR-1972    | TP53  |
| TEAD4  | hsa-miR-130b-3p | STAT3 |
| TEAD4  | hsa-miR-149-3p  | TP53  |
| TEAD4  | hsa-miR-22-3p   | HIF1A |
| TEAD4  | hsa-miR-4470    | HIF1A |
| TEAD4  | hsa-miR-4768-5p | STAT3 |

|       |                  |       |
|-------|------------------|-------|
| TEAD4 | hsa-miR-146b-5p  | NFKB1 |
| TEAD4 | hsa-miR-92a-3p   | NFKB1 |
| TEAD4 | hsa-miR-874-3p   | STAT3 |
| TEAD4 | hsa-miR-3160-3p  | HIF1A |
| TEAD4 | hsa-miR-7151-3p  | STAT3 |
| TEAD4 | hsa-miR-5681a    | STAT3 |
| TEAD4 | hsa-miR-5681b    | HIF1A |
| TEAD4 | hsa-miR-4487     | HIF1A |
| TEAD4 | hsa-miR-6755-5p  | HIF1A |
| TEAD4 | hsa-miR-92b-3p   | SMAD3 |
| TEAD4 | hsa-miR-4662a-5p | HIF1A |
| TEAD4 | hsa-miR-124-3p   | IL6   |
| TEAD4 | hsa-miR-124-3p   | PTGS2 |
| TEAD4 | hsa-miR-124-3p   | STAT3 |
| TEAD4 | hsa-miR-744-5p   | PTGS2 |
| TEAD4 | hsa-miR-744-5p   | TGFB1 |
| TEAD4 | hsa-miR-101-3p   | PTGS2 |
| TEAD4 | hsa-miR-365b-5p  | STAT3 |
| TEAD4 | hsa-miR-365a-5p  | STAT3 |
| TEAD4 | hsa-miR-18a-3p   | SMAD3 |
| TEAD4 | hsa-miR-922      | STAT3 |
| TEAD4 | hsa-miR-10b-5p   | TP53  |
| TEAD4 | hsa-miR-139-5p   | NFKB1 |
| TEAD4 | hsa-miR-4282     | HIF1A |
| TEAD4 | hsa-miR-4286     | TP53  |
| TEAD4 | hsa-miR-4778-3p  | STAT3 |
| TEAD4 | hsa-miR-6133     | TP53  |
| TEAD4 | hsa-miR-199a-5p  | PTGS2 |
| TEAD4 | hsa-miR-199a-5p  | HIF1A |
| TEAD4 | hsa-miR-199a-5p  | NFKB1 |
| TEAD4 | hsa-miR-92a-2-5p | TP53  |
| TEAD4 | hsa-miR-3128     | HIF1A |
| TEAD4 | hsa-miR-329-5p   | HIF1A |
| TEAD4 | hsa-miR-137      | PTGS2 |
| TEAD4 | hsa-miR-652-3p   | PTGS2 |
| TEAD4 | hsa-miR-6893-5p  | HIF1A |

|       |                 |       |
|-------|-----------------|-------|
| TEAD4 | hsa-miR-663a    | TGFB1 |
| TEAD4 | hsa-miR-6760-5p | TP53  |
| TEAD4 | hsa-miR-589-5p  | PTGS2 |
| TEAD4 | hsa-miR-605-5p  | TP53  |
| TEAD4 | hsa-miR-6789-3p | STAT3 |
| TEAD4 | hsa-miR-145-5p  | SMAD3 |
| TEAD4 | hsa-miR-6875-3p | STAT3 |
| TEAD4 | hsa-miR-138-5p  | HIF1A |
| TEAD4 | hsa-miR-34b-5p  | HIF1A |
| TEAD4 | hsa-miR-633     | TGFB1 |
| TEAD4 | hsa-miR-335-5p  | IL6   |
| TEAD4 | hsa-miR-335-5p  | PTGS2 |
| TEAD4 | hsa-miR-335-5p  | IL17A |
| TEAD4 | hsa-miR-335-5p  | SMAD3 |
| TEAD4 | hsa-miR-320a    | PTGS2 |
| TEAD4 | hsa-miR-1296-3p | TP53  |
| TEAD4 | hsa-miR-18a-5p  | TP53  |
| TEAD4 | hsa-miR-18a-5p  | HIF1A |
| TEAD4 | hsa-miR-18a-5p  | SMAD3 |
| TEAD4 | hsa-miR-9-5p    | NFKB1 |
| TEAD4 | hsa-miR-371b-3p | STAT3 |
| TEAD4 | hsa-miR-1908-5p | PTGS2 |
| TEAD4 | hsa-miR-5193    | TP53  |
| TEAD4 | hsa-miR-5003-5p | TP53  |
| TEAD4 | hsa-miR-146a-5p | PTGS2 |
| TEAD4 | hsa-miR-146a-5p | NFKB1 |
| TEAD4 | hsa-miR-513b-3p | TP53  |
| TEAD4 | hsa-miR-365a-3p | IL6   |
| TEAD4 | hsa-miR-19a-3p  | TP53  |
| TEAD4 | hsa-miR-2682-5p | HIF1A |
| TEAD4 | hsa-miR-142-3p  | IL6   |
| TEAD4 | hsa-miR-608     | TP53  |
| TEAD4 | hsa-miR-132-3p  | PTGS2 |
| TEAD4 | hsa-miR-6815-3p | HIF1A |
| TEAD4 | hsa-miR-3529-3p | TP53  |
| TEAD4 | hsa-miR-3529-3p | SMAD3 |

|       |                 |       |
|-------|-----------------|-------|
| TEAD4 | hsa-miR-17-5p   | TGFB1 |
| TEAD4 | hsa-miR-17-5p   | PTGS2 |
| TEAD4 | hsa-miR-17-5p   | HIF1A |
| TEAD4 | hsa-miR-17-5p   | SMAD3 |
| TEAD4 | hsa-miR-17-5p   | TP53  |
| TEAD4 | hsa-let-7a-5p   | IL6   |
| TEAD4 | hsa-let-7a-5p   | PTGS2 |
| TEAD4 | hsa-let-7a-5p   | NFKB1 |
| TEAD4 | hsa-miR-1-3p    | IL6   |
| TEAD4 | hsa-miR-618     | STAT3 |
| TEAD4 | hsa-miR-4270    | STAT3 |
| TEAD4 | hsa-miR-3668    | HIF1A |
| TEAD4 | hsa-miR-4531    | TP53  |
| TEAD4 | hsa-miR-155-5p  | IL6   |
| TEAD4 | hsa-miR-155-5p  | NFKB1 |
| TEAD4 | hsa-miR-155-5p  | SMAD3 |
| TEAD4 | hsa-miR-424-5p  | HIF1A |
| TEAD4 | hsa-miR-3121-3p | HIF1A |
| TEAD4 | hsa-miR-4720-3p | STAT3 |
| TEAD4 | hsa-miR-500b-3p | STAT3 |
| TEAD4 | hsa-miR-149-5p  | IL6   |
| TEAD4 | hsa-miR-6837-5p | STAT3 |
| TEAD4 | hsa-miR-1234-3p | STAT3 |
| TEAD4 | hsa-miR-130a-3p | TGFB1 |
| TEAD4 | hsa-miR-3165    | TP53  |
| TEAD4 | hsa-miR-519d-3p | STAT3 |
| TEAD4 | hsa-miR-519d-3p | HIF1A |
| TEAD4 | hsa-miR-223-3p  | IL6   |
| TEAD4 | hsa-miR-223-3p  | TP53  |
| TEAD4 | hsa-miR-21-5p   | TGFB1 |
| TEAD4 | hsa-miR-21-5p   | HIF1A |
| TEAD4 | hsa-miR-21-5p   | NFKB1 |
| TEAD4 | hsa-miR-4438    | STAT3 |
| TEAD4 | hsa-miR-1910-3p | HIF1A |
| TEAD4 | hsa-miR-449c-5p | HIF1A |
| TEAD4 | hsa-miR-128-3p  | PTGS2 |

|        |                 |       |
|--------|-----------------|-------|
| TEAD4  | hsa-miR-4463    | HIF1A |
| TEAD4  | hsa-miR-4441    | STAT3 |
| TEAD4  | hsa-miR-107     | IL6   |
| TEAD4  | hsa-miR-107     | HIF1A |
| TEAD4  | hsa-miR-4725-3p | TP53  |
| TFAP2A | hsa-miR-21-5p   | TGFB1 |
| TFAP2A | hsa-miR-21-5p   | NFKB1 |
| TFAP2A | hsa-miR-24-3p   | TGFB1 |
| TFAP2A | hsa-miR-1908-5p | PTGS2 |
| TFAP2C | hsa-miR-365a-5p | STAT3 |
| TFAP2C | hsa-miR-24-3p   | TGFB1 |
| TFAP2C | hsa-miR-4470    | HIF1A |
| TFAP2C | hsa-miR-211-5p  | TGFB1 |
| TFAP2C | hsa-miR-324-3p  | TGFB1 |
| TFAP2C | hsa-miR-124-3p  | PTGS2 |
| TFAP2C | hsa-miR-124-3p  | STAT3 |
| TP53   | hsa-miR-124-3p  | PTGS2 |
| TP53   | hsa-miR-124-3p  | STAT3 |
| TP53   | hsa-miR-124-3p  | IL6   |
| TP53   | hsa-miR-3934-5p | PTGS2 |
| TP53   | hsa-miR-203a-3p | IL6   |
| TP53   | hsa-miR-210-3p  | NFKB1 |
| TP53   | hsa-miR-143-3p  | PTGS2 |
| TP53   | hsa-miR-143-3p  | SMAD3 |
| TP53   | hsa-miR-26b-5p  | NFKB1 |
| TP53   | hsa-miR-26b-5p  | PTGS2 |
| TP53   | hsa-miR-199a-3p | PTGS2 |
| TP53   | hsa-miR-1908-5p | PTGS2 |
| TP53   | hsa-miR-144-3p  | TGFB1 |
| TP53   | hsa-miR-101-3p  | PTGS2 |
| TP53   | hsa-miR-24-3p   | TGFB1 |
| TP53   | hsa-miR-744-5p  | PTGS2 |
| TP53   | hsa-miR-744-5p  | TGFB1 |
| TP53   | hsa-miR-26a-5p  | IL6   |
| TP53   | hsa-miR-324-3p  | TGFB1 |
| TP53   | hsa-miR-93-5p   | TGFB1 |

|      |                 |       |
|------|-----------------|-------|
| TP53 | hsa-miR-137     | PTGS2 |
| TP53 | hsa-miR-663a    | TGFB1 |
| TP53 | hsa-miR-633     | TGFB1 |
| TP53 | hsa-miR-320a    | PTGS2 |
| TP53 | hsa-miR-132-3p  | PTGS2 |
| TP53 | hsa-miR-365a-3p | IL6   |
| TP53 | hsa-miR-29b-3p  | TGFB1 |
| TP53 | hsa-let-7a-5p   | IL6   |
| TP53 | hsa-let-7a-5p   | PTGS2 |
| TP53 | hsa-let-7a-5p   | NFKB1 |
| TP53 | hsa-let-7b-5p   | PTGS2 |
| TP53 | hsa-miR-130a-3p | TGFB1 |
| TP53 | hsa-miR-193b-3p | SMAD3 |
| TP53 | hsa-miR-21-5p   | TGFB1 |
| TP53 | hsa-miR-21-5p   | NFKB1 |
| TP53 | hsa-miR-199a-5p | PTGS2 |
| TP53 | hsa-miR-199a-5p | NFKB1 |
| TP63 | hsa-miR-132-3p  | PTGS2 |
| TP63 | hsa-miR-139-5p  | NFKB1 |
| TP63 | hsa-miR-4270    | STAT3 |
| TP63 | hsa-let-7a-5p   | PTGS2 |
| TP63 | hsa-let-7a-5p   | NFKB1 |
| TP63 | hsa-miR-365a-5p | STAT3 |
| TP63 | hsa-miR-100-5p  | PTGS2 |
| TP63 | hsa-miR-137     | PTGS2 |
| TP63 | hsa-miR-143-3p  | PTGS2 |
| TP63 | hsa-miR-143-3p  | TNF   |
| TP63 | hsa-miR-143-3p  | SMAD3 |
| TP63 | hsa-miR-214-3p  | TP53  |
| TP63 | hsa-miR-6837-5p | STAT3 |
| TP63 | hsa-miR-195-5p  | SMAD3 |
| TP63 | hsa-miR-26b-5p  | NFKB1 |
| TP63 | hsa-miR-26b-5p  | PTGS2 |
| TP63 | hsa-miR-3165    | TP53  |
| TP63 | hsa-miR-935     | HIF1A |
| TP63 | hsa-miR-454-3p  | TP53  |



|      |                  |       |
|------|------------------|-------|
| TP63 | hsa-miR-6511a-5p | HIF1A |
| TP63 | hsa-miR-30b-5p   | TP53  |
| TP63 | hsa-miR-6789-3p  | STAT3 |
| TP63 | hsa-miR-187-3p   | TNF   |
| TP63 | hsa-miR-608      | TP53  |
| TP63 | hsa-miR-199a-3p  | PTGS2 |
| TP63 | hsa-miR-1908-5p  | PTGS2 |
| TP63 | hsa-miR-155-5p   | NFKB1 |
| TP63 | hsa-miR-155-5p   | SMAD3 |
| TP63 | hsa-miR-199a-5p  | PTGS2 |
| TP63 | hsa-miR-199a-5p  | HIF1A |
| TP63 | hsa-miR-199a-5p  | NFKB1 |
| TP63 | hsa-miR-22-3p    | HIF1A |
| TP63 | hsa-miR-3074-3p  | HIF1A |
| TP63 | hsa-miR-4290     | SMAD3 |
| TP63 | hsa-miR-145-5p   | SMAD3 |
| TP63 | hsa-miR-6871-3p  | STAT3 |
| TP63 | hsa-miR-138-2-3p | STAT3 |
| TP63 | hsa-miR-589-5p   | PTGS2 |
| TP63 | hsa-miR-6875-3p  | STAT3 |
| TP63 | hsa-miR-1322     | HIF1A |
| TP63 | hsa-miR-1910-3p  | HIF1A |
| TP63 | hsa-miR-4487     | HIF1A |
| TP63 | hsa-miR-92b-3p   | SMAD3 |
| TP63 | hsa-miR-200a-3p  | TP53  |
| TP63 | hsa-miR-200a-3p  | SMAD3 |
| TP63 | hsa-miR-449c-5p  | HIF1A |
| TP63 | hsa-miR-138-5p   | HIF1A |
| TP63 | hsa-miR-4531     | TP53  |
| TP63 | hsa-miR-4441     | STAT3 |
| TP63 | hsa-miR-1181     | STAT3 |
| TP63 | hsa-miR-320a     | PTGS2 |
| TP63 | hsa-miR-4470     | HIF1A |
| TP63 | hsa-miR-34b-5p   | HIF1A |
| TP63 | hsa-miR-130a-3p  | TNF   |
| TP63 | hsa-miR-3609     | HIF1A |

|      |                  |       |
|------|------------------|-------|
| TP73 | hsa-miR-18a-5p   | TP53  |
| TP73 | hsa-miR-18a-5p   | HIF1A |
| TP73 | hsa-miR-18a-5p   | SMAD3 |
| TP73 | hsa-miR-20a-5p   | TP53  |
| TP73 | hsa-miR-20a-5p   | HIF1A |
| TP73 | hsa-miR-4463     | HIF1A |
| TP73 | hsa-miR-19b-3p   | TGFB1 |
| TP73 | hsa-miR-19b-3p   | TP53  |
| TP73 | hsa-miR-92a-1-5p | TP53  |
| TP73 | hsa-miR-18a-3p   | SMAD3 |
| TP73 | hsa-miR-19a-3p   | TP53  |
| TP73 | hsa-miR-181a-5p  | PTGS2 |
| TP73 | hsa-miR-181a-5p  | STAT3 |
| TP73 | hsa-miR-5702     | TP53  |
| UBTF | hsa-miR-132-3p   | PTGS2 |
| UBTF | hsa-miR-139-5p   | NFKB1 |
| UBTF | hsa-miR-3934-5p  | PTGS2 |
| UBTF | hsa-miR-9-5p     | NFKB1 |
| UBTF | hsa-miR-146b-5p  | NFKB1 |
| UBTF | hsa-miR-146b-5p  | TLR4  |
| UBTF | hsa-miR-149-5p   | IL6   |
| UBTF | hsa-miR-33a-5p   | HIF1A |
| UBTF | hsa-miR-6809-3p  | STAT3 |
| UBTF | hsa-miR-130a-3p  | TGFB1 |
| UBTF | hsa-miR-149-3p   | TP53  |
| UBTF | hsa-miR-24-3p    | TGFB1 |
| UBTF | hsa-miR-22-3p    | HIF1A |
| UBTF | hsa-miR-193b-3p  | SMAD3 |
| UBTF | hsa-miR-935      | HIF1A |
| UBTF | hsa-miR-622      | TP53  |
| UBTF | hsa-miR-2682-5p  | HIF1A |
| UBTF | hsa-miR-3160-3p  | HIF1A |
| UBTF | hsa-miR-4659a-3p | TLR4  |
| UBTF | hsa-miR-6815-3p  | HIF1A |
| UBTF | hsa-miR-137      | PTGS2 |
| UBTF | hsa-miR-5094     | HIF1A |

|      |                  |       |
|------|------------------|-------|
| UBTF | hsa-miR-145-5p   | SMAD3 |
| UBTF | hsa-miR-449c-5p  | HIF1A |
| UBTF | hsa-miR-5193     | TP53  |
| UBTF | hsa-miR-589-5p   | PTGS2 |
| UBTF | hsa-miR-144-3p   | TGFB1 |
| UBTF | hsa-miR-1322     | HIF1A |
| UBTF | hsa-miR-618      | STAT3 |
| UBTF | hsa-miR-4270     | STAT3 |
| UBTF | hsa-miR-92b-3p   | SMAD3 |
| UBTF | hsa-miR-200a-3p  | TP53  |
| UBTF | hsa-miR-200a-3p  | SMAD3 |
| UBTF | hsa-miR-124-3p   | IL6   |
| UBTF | hsa-miR-124-3p   | PTGS2 |
| UBTF | hsa-miR-124-3p   | STAT3 |
| UBTF | hsa-miR-138-5p   | HIF1A |
| UBTF | hsa-miR-4659b-3p | TLR4  |
| UBTF | hsa-miR-1181     | STAT3 |
| UBTF | hsa-miR-6872-3p  | STAT3 |
| UBTF | hsa-miR-320a     | PTGS2 |
| UBTF | hsa-miR-199b-5p  | HIF1A |
| USF1 | hsa-miR-132-3p   | PTGS2 |
| USF1 | hsa-miR-210-3p   | HIF1A |
| USF1 | hsa-let-7a-5p    | PTGS2 |
| USF1 | hsa-miR-5003-5p  | TP53  |
| USF1 | hsa-miR-33a-5p   | HIF1A |
| USF1 | hsa-miR-214-3p   | TP53  |
| USF1 | hsa-miR-150-5p   | TP53  |
| USF1 | hsa-miR-5197-5p  | TP53  |
| USF1 | hsa-miR-4470     | HIF1A |
| USF1 | hsa-miR-199a-3p  | PTGS2 |
| USF1 | hsa-miR-6511a-5p | HIF1A |
| USF1 | hsa-miR-2682-5p  | HIF1A |
| USF1 | hsa-miR-1908-5p  | PTGS2 |
| USF1 | hsa-miR-6789-3p  | STAT3 |
| USF1 | hsa-miR-4516     | STAT3 |
| USF1 | hsa-miR-4516     | TP53  |

|      |                 |       |
|------|-----------------|-------|
| USF1 | hsa-miR-4531    | TP53  |
| USF1 | hsa-miR-21-5p   | TGFB1 |
| USF1 | hsa-miR-21-5p   | HIF1A |
| USF1 | hsa-miR-137     | PTGS2 |
| USF1 | hsa-miR-199a-5p | PTGS2 |
| USF1 | hsa-miR-199a-5p | HIF1A |
| USF1 | hsa-miR-8071    | TP53  |
| USF1 | hsa-miR-3529-3p | TP53  |
| USF1 | hsa-miR-5193    | TP53  |
| USF1 | hsa-miR-663a    | TGFB1 |
| USF1 | hsa-miR-6760-5p | TP53  |
| USF1 | hsa-miR-6875-3p | STAT3 |
| USF1 | hsa-miR-128-3p  | PTGS2 |
| USF1 | hsa-miR-124-3p  | PTGS2 |
| USF1 | hsa-miR-124-3p  | STAT3 |
| USF1 | hsa-miR-1181    | STAT3 |
| USF1 | hsa-miR-320a    | PTGS2 |
| USF1 | hsa-miR-3121-3p | HIF1A |
| USF2 | hsa-miR-18a-5p  | TP53  |
| USF2 | hsa-miR-18a-5p  | HIF1A |
| USF2 | hsa-miR-18a-5p  | SMAD3 |
| USF2 | hsa-miR-3934-5p | PTGS2 |
| USF2 | hsa-miR-210-3p  | NFKB1 |
| USF2 | hsa-miR-210-3p  | HIF1A |
| USF2 | hsa-miR-4799-5p | HIF1A |
| USF2 | hsa-miR-130b-3p | STAT3 |
| USF2 | hsa-miR-7110-3p | STAT3 |
| USF2 | hsa-miR-942-5p  | TLR4  |
| USF2 | hsa-miR-6809-3p | STAT3 |
| USF2 | hsa-miR-130a-3p | TGFB1 |
| USF2 | hsa-miR-130a-3p | TNF   |
| USF2 | hsa-miR-20a-5p  | TP53  |
| USF2 | hsa-miR-20a-5p  | HIF1A |
| USF2 | hsa-miR-17-5p   | TGFB1 |
| USF2 | hsa-miR-17-5p   | PTGS2 |
| USF2 | hsa-miR-17-5p   | HIF1A |

|      |                 |       |
|------|-----------------|-------|
| USF2 | hsa-miR-17-5p   | SMAD3 |
| USF2 | hsa-miR-17-5p   | TP53  |
| USF2 | hsa-miR-199b-5p | HIF1A |
| USF2 | hsa-miR-24-3p   | TGFB1 |
| USF2 | hsa-miR-4306    | TP53  |
| USF2 | hsa-miR-5197-5p | TP53  |
| USF2 | hsa-miR-5692a   | HIF1A |
| USF2 | hsa-miR-4470    | HIF1A |
| USF2 | hsa-miR-324-3p  | TGFB1 |
| USF2 | hsa-miR-935     | HIF1A |
| USF2 | hsa-miR-19a-3p  | TNF   |
| USF2 | hsa-miR-19a-3p  | TP53  |
| USF2 | hsa-miR-3128    | HIF1A |
| USF2 | hsa-miR-92a-3p  | NFKB1 |
| USF2 | hsa-miR-93-5p   | TGFB1 |
| USF2 | hsa-miR-93-5p   | STAT3 |
| USF2 | hsa-miR-93-5p   | HIF1A |
| USF2 | hsa-let-7a-5p   | PTGS2 |
| USF2 | hsa-let-7a-5p   | NFKB1 |
| USF2 | hsa-miR-1322    | HIF1A |
| USF2 | hsa-miR-1908-5p | PTGS2 |
| USF2 | hsa-miR-106b-3p | HIF1A |
| USF2 | hsa-miR-145-5p  | SMAD3 |
| USF2 | hsa-miR-449c-5p | HIF1A |
| USF2 | hsa-miR-5193    | TP53  |
| USF2 | hsa-miR-6871-3p | STAT3 |
| USF2 | hsa-miR-19b-3p  | TGFB1 |
| USF2 | hsa-miR-19b-3p  | TP53  |
| USF2 | hsa-miR-589-5p  | PTGS2 |
| USF2 | hsa-miR-144-3p  | TGFB1 |
| USF2 | hsa-let-7b-5p   | PTGS2 |
| USF2 | hsa-let-7b-5p   | TLR4  |
| USF2 | hsa-let-7b-5p   | HIF1A |
| USF2 | hsa-miR-22-3p   | HIF1A |
| USF2 | hsa-let-7i-5p   | TLR4  |
| USF2 | hsa-miR-618     | STAT3 |

|       |                  |       |
|-------|------------------|-------|
| USF2  | hsa-miR-4659a-3p | TLR4  |
| USF2  | hsa-miR-4659b-3p | TLR4  |
| USF2  | hsa-miR-106b-5p  | STAT3 |
| USF2  | hsa-miR-106b-5p  | HIF1A |
| USF2  | hsa-miR-146b-5p  | NFKB1 |
| USF2  | hsa-miR-146b-5p  | TLR4  |
| USF2  | hsa-miR-92a-1-5p | TP53  |
| USF2  | hsa-miR-18a-3p   | SMAD3 |
| VDR   | hsa-miR-150-5p   | TP53  |
| VDR   | hsa-miR-663a     | TGFB1 |
| VDR   | hsa-miR-21-5p    | TGFB1 |
| VDR   | hsa-miR-21-5p    | HIF1A |
| VDR   | hsa-miR-211-5p   | TGFB1 |
| VDR   | hsa-miR-1910-3p  | HIF1A |
| VDR   | hsa-miR-30d-5p   | TP53  |
| VDR   | hsa-let-7b-5p    | HIF1A |
| VDR   | hsa-miR-6789-3p  | STAT3 |
| VDR   | hsa-miR-6872-3p  | STAT3 |
| VDR   | hsa-miR-3662     | HIF1A |
| VEZF1 | hsa-miR-18a-5p   | TP53  |
| VEZF1 | hsa-miR-18a-5p   | SMAD3 |
| VEZF1 | hsa-miR-19a-3p   | TP53  |
| VEZF1 | hsa-miR-19b-3p   | TP53  |
| VEZF1 | hsa-miR-17-5p    | PTGS2 |
| VEZF1 | hsa-miR-17-5p    | TP53  |
| VEZF1 | hsa-miR-17-5p    | SMAD3 |
| VEZF1 | hsa-miR-6789-3p  | STAT3 |
| VEZF1 | hsa-miR-92b-3p   | SMAD3 |
| VEZF1 | hsa-miR-1181     | STAT3 |
| VEZF1 | hsa-miR-92a-1-5p | TP53  |
| VEZF1 | hsa-miR-18a-3p   | SMAD3 |
| WHSC1 | hsa-miR-625-3p   | HIF1A |
| WHSC1 | hsa-let-7a-5p    | NFKB1 |
| WHSC1 | hsa-miR-151a-3p  | HIF1A |
| WHSC1 | hsa-miR-877-3p   | STAT3 |
| WHSC1 | hsa-miR-622      | TP53  |

|       |                 |       |
|-------|-----------------|-------|
| WHSC1 | hsa-miR-3128    | HIF1A |
| WHSC1 | hsa-miR-30b-5p  | TP53  |
| WHSC1 | hsa-miR-3074-3p | HIF1A |
| WHSC1 | hsa-miR-449c-5p | HIF1A |
| WHSC1 | hsa-miR-4748    | HIF1A |
| WHSC1 | hsa-miR-146b-5p | NFKB1 |
| WHSC1 | hsa-miR-940     | HIF1A |
| WHSC1 | hsa-miR-6807-3p | HIF1A |
| WHSC1 | hsa-miR-4487    | HIF1A |
| WHSC1 | hsa-miR-6807-5p | STAT3 |
| WHSC1 | hsa-miR-922     | STAT3 |
| XBP1  | hsa-miR-199a-5p | HIF1A |
| XBP1  | hsa-miR-4470    | HIF1A |
| XBP1  | hsa-miR-3165    | TP53  |
| XBP1  | hsa-miR-6845-3p | STAT3 |
| YY1   | hsa-miR-3934-5p | PTGS2 |
| YY1   | hsa-miR-203a-3p | IL6   |
| YY1   | hsa-miR-203a-3p | TNF   |
| YY1   | hsa-miR-210-3p  | NFKB1 |
| YY1   | hsa-miR-210-3p  | HIF1A |
| YY1   | hsa-miR-4684-5p | STAT3 |
| YY1   | hsa-miR-143-3p  | PTGS2 |
| YY1   | hsa-miR-143-3p  | TNF   |
| YY1   | hsa-miR-143-3p  | SMAD3 |
| YY1   | hsa-miR-149-3p  | TP53  |
| YY1   | hsa-miR-4306    | TP53  |
| YY1   | hsa-miR-6722-3p | TP53  |
| YY1   | hsa-miR-4470    | HIF1A |
| YY1   | hsa-miR-26b-5p  | NFKB1 |
| YY1   | hsa-miR-26b-5p  | PTGS2 |
| YY1   | hsa-miR-146b-5p | NFKB1 |
| YY1   | hsa-miR-199a-3p | PTGS2 |
| YY1   | hsa-miR-5681a   | STAT3 |
| YY1   | hsa-miR-144-3p  | TGFB1 |
| YY1   | hsa-miR-5681b   | HIF1A |
| YY1   | hsa-miR-4487    | HIF1A |

|     |                 |       |
|-----|-----------------|-------|
| YY1 | hsa-miR-7113-5p | STAT3 |
| YY1 | hsa-miR-124-3p  | IL6   |
| YY1 | hsa-miR-124-3p  | PTGS2 |
| YY1 | hsa-miR-124-3p  | STAT3 |
| YY1 | hsa-miR-106b-5p | STAT3 |
| YY1 | hsa-miR-106b-5p | HIF1A |
| YY1 | hsa-miR-1234-3p | STAT3 |
| YY1 | hsa-miR-138-5p  | HIF1A |
| YY1 | hsa-miR-199b-5p | HIF1A |
| YY1 | hsa-miR-101-3p  | PTGS2 |
| YY1 | hsa-miR-889-3p  | HIF1A |
| YY1 | hsa-miR-153-5p  | HIF1A |
| YY1 | hsa-miR-365a-5p | STAT3 |
| YY1 | hsa-miR-6754-5p | STAT3 |
| YY1 | hsa-miR-4286    | TP53  |
| YY1 | hsa-miR-33a-5p  | HIF1A |
| YY1 | hsa-miR-1181    | STAT3 |
| YY1 | hsa-miR-24-3p   | TGFB1 |
| YY1 | hsa-miR-155-5p  | IL6   |
| YY1 | hsa-miR-155-5p  | NFKB1 |
| YY1 | hsa-miR-155-5p  | SMAD3 |
| YY1 | hsa-miR-26a-5p  | IL6   |
| YY1 | hsa-miR-622     | TP53  |
| YY1 | hsa-miR-4418    | HIF1A |
| YY1 | hsa-miR-324-3p  | TGFB1 |
| YY1 | hsa-miR-5702    | TP53  |
| YY1 | hsa-miR-137     | PTGS2 |
| YY1 | hsa-miR-4290    | SMAD3 |
| YY1 | hsa-miR-6893-5p | HIF1A |
| YY1 | hsa-miR-663a    | TGFB1 |
| YY1 | hsa-miR-6760-5p | TP53  |
| YY1 | hsa-miR-589-5p  | PTGS2 |
| YY1 | hsa-miR-6789-3p | STAT3 |
| YY1 | hsa-miR-1322    | HIF1A |
| YY1 | hsa-miR-145-5p  | SMAD3 |
| YY1 | hsa-miR-6872-3p | STAT3 |



|     |                 |       |
|-----|-----------------|-------|
| YY1 | hsa-miR-6875-3p | STAT3 |
| YY1 | hsa-miR-200a-3p | TP53  |
| YY1 | hsa-miR-200a-3p | SMAD3 |
| YY1 | hsa-miR-329-5p  | HIF1A |
| YY1 | hsa-miR-34b-5p  | HIF1A |
| YY1 | hsa-miR-320a    | PTGS2 |
| YY1 | hsa-miR-132-3p  | PTGS2 |
| YY1 | hsa-miR-9-5p    | NFKB1 |
| YY1 | hsa-miR-371b-3p | STAT3 |
| YY1 | hsa-miR-1908-5p | PTGS2 |
| YY1 | hsa-miR-5193    | TP53  |
| YY1 | hsa-miR-7110-3p | STAT3 |
| YY1 | hsa-miR-6808-5p | HIF1A |
| YY1 | hsa-miR-6806-5p | HIF1A |
| YY1 | hsa-miR-365a-3p | IL6   |
| YY1 | hsa-miR-935     | HIF1A |
| YY1 | hsa-miR-2682-5p | HIF1A |
| YY1 | hsa-miR-142-3p  | IL6   |
| YY1 | hsa-miR-4531    | TP53  |
| YY1 | hsa-miR-6815-3p | HIF1A |
| YY1 | hsa-miR-3074-3p | HIF1A |
| YY1 | hsa-miR-22-3p   | HIF1A |
| YY1 | hsa-miR-4682    | TP53  |
| YY1 | hsa-let-7a-5p   | IL6   |
| YY1 | hsa-let-7a-5p   | PTGS2 |
| YY1 | hsa-let-7a-5p   | NFKB1 |
| YY1 | hsa-miR-618     | STAT3 |
| YY1 | hsa-miR-608     | TP53  |
| YY1 | hsa-miR-424-5p  | HIF1A |
| YY1 | hsa-miR-149-5p  | IL6   |
| YY1 | hsa-miR-6842-5p | TP53  |
| YY1 | hsa-miR-195-5p  | SMAD3 |
| YY1 | hsa-miR-92b-3p  | SMAD3 |
| YY1 | hsa-miR-3165    | TP53  |
| YY1 | hsa-miR-21-5p   | TGFB1 |
| YY1 | hsa-miR-21-5p   | HIF1A |

|        |                 |       |
|--------|-----------------|-------|
| YY1    | hsa-miR-21-5p   | NFKB1 |
| YY1    | hsa-miR-211-5p  | TGFB1 |
| YY1    | hsa-miR-199a-5p | PTGS2 |
| YY1    | hsa-miR-199a-5p | HIF1A |
| YY1    | hsa-miR-199a-5p | NFKB1 |
| YY1    | hsa-miR-1910-3p | HIF1A |
| YY1    | hsa-miR-449c-5p | HIF1A |
| YY1    | hsa-miR-4748    | HIF1A |
| YY1    | hsa-miR-106b-3p | HIF1A |
| YY1    | hsa-miR-299-5p  | HIF1A |
| ZBTB7A | hsa-miR-9-5p    | NFKB1 |
| ZBTB7A | hsa-miR-210-3p  | NFKB1 |
| ZBTB7A | hsa-miR-210-3p  | HIF1A |
| ZBTB7A | hsa-let-7a-5p   | NFKB1 |
| ZBTB7A | hsa-miR-6809-3p | STAT3 |
| ZBTB7A | hsa-miR-143-3p  | SMAD3 |
| ZBTB7A | hsa-miR-195-5p  | SMAD3 |
| ZBTB7A | hsa-miR-193b-3p | SMAD3 |
| ZBTB7A | hsa-miR-4470    | HIF1A |
| ZBTB7A | hsa-miR-146b-5p | NFKB1 |
| ZBTB7A | hsa-miR-145-5p  | SMAD3 |
| ZBTB7A | hsa-miR-449c-5p | HIF1A |
| ZBTB7A | hsa-miR-663a    | TGFB1 |
| ZBTB7A | hsa-miR-4487    | HIF1A |
| ZBTB7A | hsa-miR-6872-3p | STAT3 |
| ZBTB7A | hsa-miR-92b-3p  | SMAD3 |
| ZBTB7A | hsa-miR-200a-3p | SMAD3 |
| ZBTB7A | hsa-miR-1234-3p | STAT3 |
| ZBTB7A | hsa-miR-34b-5p  | HIF1A |
| ZBTB7A | hsa-miR-199b-5p | HIF1A |
| ZBTB7A | hsa-miR-138-5p  | HIF1A |
| ZBTB7A | hsa-let-7e-5p   | STAT3 |
| ZEB1   | hsa-miR-5193    | TP53  |
| ZEB1   | hsa-miR-139-5p  | NFKB1 |
| ZEB1   | hsa-miR-6872-3p | STAT3 |
| ZEB1   | hsa-miR-320a    | PTGS2 |

|         |                 |       |
|---------|-----------------|-------|
| ZEB1    | hsa-miR-589-5p  | PTGS2 |
| ZEB1    | hsa-miR-4531    | TP53  |
| ZFP42   | hsa-miR-4271    | TP53  |
| ZFP42   | hsa-miR-1234-3p | STAT3 |
| ZFX     | hsa-miR-199a-5p | NFKB1 |
| ZFX     | hsa-miR-199a-5p | HIF1A |
| ZKSCAN1 | hsa-miR-132-3p  | PTGS2 |
| ZKSCAN1 | hsa-miR-22-3p   | HIF1A |
| ZKSCAN1 | hsa-miR-1908-5p | PTGS2 |
| ZMIZ1   | hsa-miR-5193    | TP53  |
| ZMIZ1   | hsa-miR-424-5p  | HIF1A |
| ZMIZ1   | hsa-miR-106b-5p | STAT3 |
| ZMIZ1   | hsa-miR-106b-5p | HIF1A |
| ZMIZ1   | hsa-miR-30b-5p  | TP53  |
| ZMIZ1   | hsa-miR-106b-3p | HIF1A |
| ZMIZ1   | hsa-miR-1181    | STAT3 |
| ZNF143  | hsa-miR-132-3p  | PTGS2 |
| ZNF143  | hsa-miR-625-3p  | HIF1A |
| ZNF143  | hsa-miR-1908-5p | PTGS2 |
| ZNF143  | hsa-miR-7110-3p | STAT3 |
| ZNF143  | hsa-miR-6809-3p | STAT3 |
| ZNF143  | hsa-miR-143-3p  | PTGS2 |
| ZNF143  | hsa-miR-143-3p  | TNF   |
| ZNF143  | hsa-miR-143-3p  | SMAD3 |
| ZNF143  | hsa-miR-22-3p   | HIF1A |
| ZNF143  | hsa-miR-6760-5p | TP53  |
| ZNF143  | hsa-miR-193b-3p | SMAD3 |
| ZNF143  | hsa-miR-4470    | HIF1A |
| ZNF143  | hsa-miR-935     | HIF1A |
| ZNF143  | hsa-miR-1322    | HIF1A |
| ZNF143  | hsa-miR-4290    | SMAD3 |
| ZNF143  | hsa-miR-145-5p  | SMAD3 |
| ZNF143  | hsa-miR-3529-3p | TP53  |
| ZNF143  | hsa-miR-3529-3p | SMAD3 |
| ZNF143  | hsa-miR-30e-5p  | TP53  |
| ZNF143  | hsa-miR-324-3p  | TGFB1 |

|        |                 |       |
|--------|-----------------|-------|
| ZNF143 | hsa-let-7a-5p   | IL6   |
| ZNF143 | hsa-let-7a-5p   | PTGS2 |
| ZNF143 | hsa-let-7a-5p   | NFKB1 |
| ZNF143 | hsa-miR-7151-3p | STAT3 |
| ZNF143 | hsa-miR-589-5p  | PTGS2 |
| ZNF143 | hsa-miR-195-5p  | SMAD3 |
| ZNF143 | hsa-miR-9-5p    | NFKB1 |
| ZNF143 | hsa-miR-618     | STAT3 |
| ZNF143 | hsa-miR-128-3p  | PTGS2 |
| ZNF143 | hsa-miR-3662    | HIF1A |
| ZNF143 | hsa-miR-124-3p  | IL6   |
| ZNF143 | hsa-miR-124-3p  | PTGS2 |
| ZNF143 | hsa-miR-124-3p  | STAT3 |
| ZNF143 | hsa-miR-155-5p  | IL6   |
| ZNF143 | hsa-miR-155-5p  | NFKB1 |
| ZNF143 | hsa-miR-155-5p  | SMAD3 |
| ZNF143 | hsa-miR-130a-3p | TGFB1 |
| ZNF143 | hsa-miR-130a-3p | TNF   |
| ZNF217 | hsa-miR-92b-3p  | SMAD3 |
| ZNF217 | hsa-miR-155-5p  | NFKB1 |
| ZNF217 | hsa-miR-155-5p  | SMAD3 |
| ZNF250 | hsa-miR-1178-3p | STAT3 |
| ZNF263 | hsa-miR-18a-5p  | TP53  |
| ZNF263 | hsa-miR-18a-5p  | HIF1A |
| ZNF263 | hsa-miR-18a-5p  | SMAD3 |
| ZNF263 | hsa-miR-26a-5p  | IL6   |
| ZNF263 | hsa-miR-3934-5p | PTGS2 |
| ZNF263 | hsa-miR-150-5p  | TP53  |
| ZNF263 | hsa-miR-125a-5p | TP53  |
| ZNF263 | hsa-miR-139-5p  | NFKB1 |
| ZNF263 | hsa-miR-6808-5p | HIF1A |
| ZNF263 | hsa-let-7e-5p   | STAT3 |
| ZNF263 | hsa-miR-20a-5p  | TP53  |
| ZNF263 | hsa-miR-20a-5p  | HIF1A |
| ZNF263 | hsa-miR-19a-3p  | TP53  |
| ZNF263 | hsa-miR-6845-3p | STAT3 |

|        |                 |       |
|--------|-----------------|-------|
| ZNF263 | hsa-miR-142-3p  | IL6   |
| ZNF263 | hsa-miR-93-5p   | TGFB1 |
| ZNF263 | hsa-miR-93-5p   | STAT3 |
| ZNF263 | hsa-miR-93-5p   | HIF1A |
| ZNF263 | hsa-miR-17-5p   | TGFB1 |
| ZNF263 | hsa-miR-17-5p   | PTGS2 |
| ZNF263 | hsa-miR-17-5p   | HIF1A |
| ZNF263 | hsa-miR-17-5p   | SMAD3 |
| ZNF263 | hsa-miR-17-5p   | TP53  |
| ZNF263 | hsa-miR-663a    | TGFB1 |
| ZNF263 | hsa-miR-9-5p    | NFKB1 |
| ZNF263 | hsa-miR-124-3p  | IL6   |
| ZNF263 | hsa-miR-124-3p  | PTGS2 |
| ZNF263 | hsa-miR-124-3p  | STAT3 |
| ZNF263 | hsa-miR-106b-5p | STAT3 |
| ZNF263 | hsa-miR-106b-5p | HIF1A |
| ZNF263 | hsa-miR-106b-3p | HIF1A |
| ZNF263 | hsa-miR-320a    | PTGS2 |
| ZNF263 | hsa-miR-18a-3p  | SMAD3 |
| ZNF263 | hsa-miR-26b-5p  | NFKB1 |
| ZNF263 | hsa-miR-26b-5p  | PTGS2 |
| ZNF384 | hsa-miR-3165    | TP53  |
| ZNF384 | hsa-miR-4650-5p | TP53  |
| ZNF384 | hsa-miR-4270    | STAT3 |
| ZNF384 | hsa-miR-5094    | HIF1A |
| ZNF384 | hsa-miR-143-3p  | TNF   |
| ZNF384 | hsa-miR-199b-5p | HIF1A |
| ZNF384 | hsa-miR-22-3p   | HIF1A |
| ZNF384 | hsa-miR-4470    | HIF1A |
| ZNF384 | hsa-miR-3128    | HIF1A |
| ZNF384 | hsa-miR-24-3p   | TGFB1 |
| ZNF384 | hsa-miR-4531    | TP53  |
| ZNF384 | hsa-miR-6815-3p | HIF1A |
| ZNF384 | hsa-miR-449c-5p | HIF1A |
| ZNF384 | hsa-miR-30e-5p  | TP53  |
| ZNF384 | hsa-miR-144-3p  | TGFB1 |

|        |                 |       |  |  |
|--------|-----------------|-------|--|--|
| ZNF384 | hsa-miR-4487    | HIF1A |  |  |
| ZNF384 | hsa-miR-124-3p  | STAT3 |  |  |
| ZNF384 | hsa-miR-138-5p  | HIF1A |  |  |
| ZNF384 | hsa-miR-130a-3p | TGFB1 |  |  |
| ZNF384 | hsa-miR-130a-3p | TNF   |  |  |
| ZNF83  | hsa-miR-4799-5p | HIF1A |  |  |
| ZNF83  | hsa-miR-6875-3p | STAT3 |  |  |

**Supplemental Table 7: Dysregulated miRNAs in cholangiopathies.** This table shows dysregulated miRNAs in cholangiopathies. Dysregulated miRNAs were curated by collecting differentially expressed miRNAs between disease and healthy control samples with validation shown in the same reference. PBMC, peripheral blood mononuclear cell.

| <b>Disease</b>              | <b>miRNAs</b>   | <b>Sample</b>          | <b>Level compared to healthy control</b> | <b>Pubmed ID</b> |
|-----------------------------|-----------------|------------------------|------------------------------------------|------------------|
| Biliary Atresia             | hsa-miR-21-5p   | serum                  | up                                       | 26927196         |
| Biliary Atresia             | hsa-miR-200b-3p | liver                  | up                                       | 24412919         |
| Biliary Atresia             | hsa-miR-222-3p  | liver                  | up                                       | 25238119         |
| Biliary Atresia             | hsa-miR-122-5p  | plasma                 | up                                       | 26960174         |
| Biliary Atresia             | hsa-miR-100-5p  | plasma                 | up                                       | 26960174         |
| Biliary Atresia             | hsa-miR-140-3p  | plasma                 | down                                     | 26960174         |
| Biliary Atresia             | hsa-miR-126-3p  | plasma                 | down                                     | 26960174         |
| Biliary Atresia             | hsa-miR-150-3p  | serum                  | up                                       | 26879603         |
| Biliary Atresia             | hsa-miR-4689    | serum                  | up                                       | 26879603         |
| Biliary Atresia             | hsa-miR-92a-3p  | serum                  | up                                       | 26879603         |
| Biliary Atresia             | hsa-miR-4429    | serum                  | down                                     | 26879603         |
| Biliary Atresia             | hsa-miR-124-3p  | liver                  | down                                     | 25450715         |
| Primary Biliary Cholangitis | hsa-miR-328a-3p | liver                  | up                                       | 19345069         |
| Primary Biliary Cholangitis | hsa-miR-122-5p  | liver                  | down                                     | 19345069         |
| Primary Biliary Cholangitis | hsa-miR-26a-5p  | liver                  | down                                     | 19345069         |
| Primary Biliary Cholangitis | hsa-miR-155-5p  | PBMC                   | up                                       | 23834361         |
| Primary Biliary Cholangitis | hsa-miR-146a-5p | PBMC                   | up                                       | 23834361         |
| Primary Biliary Cholangitis | hsa-miR-506-3p  | cholangiocyte in liver | up                                       | 22383162         |
| Primary Biliary Cholangitis | hsa-miR-505-3p  | serum                  | down                                     | 23776611         |
| Primary Biliary Cholangitis | hsa-miR-197-3p  | serum                  | down                                     | 23776611         |
| Primary Biliary Cholangitis | hsa-miR-500-3p  | serum                  | down                                     | 23776611         |
| Primary Biliary Cholangitis | hsa-miR-15a-5p  | PBMC                   | up                                       | 23173724         |
| Primary Biliary Cholangitis | hsa-miR-20a-5p  | PBMC                   | up                                       | 23173724         |
| Primary Biliary Cholangitis | hsa-miR-140-5p  | PBMC                   | up                                       | 23173724         |

|                                |                 |              |      |          |
|--------------------------------|-----------------|--------------|------|----------|
| Primary Biliary Cholangitis    | hsa-miR-106b-5p | PBMC         | up   | 23173724 |
| Primary Biliary Cholangitis    | has-miR-3654    | PBMC         | down | 23173724 |
| Primary Biliary Cholangitis    | hsa-miR-181a-5p | PBMC         | down | 23173724 |
| Primary Biliary Cholangitis    | hsa-miR-122-5p  | serum        | up   | 25347847 |
| Primary Biliary Cholangitis    | hsa-miR-34a-5p  | serum        | up   | 25347847 |
| Primary Biliary Cholangitis    | hsa-miR-141-5p  | serum        | up   | 25347847 |
| Primary Biliary Cholangitis    | hsa-miR-27b-5p  | serum        | up   | 25347847 |
| Primary Biliary Cholangitis    | hsa-miR-26b-5p  | serum        | down | 25347847 |
| Primary Biliary Cholangitis    | hsa-miR-572     | plasma, PBMC | up   | 27246196 |
| Primary Biliary Cholangitis    | hsa-miR-575     | plasma, PBMC | up   | 27246196 |
| Primary Biliary Cholangitis    | hsa-miR-92a-3p  | plasma, PBMC | down | 27246196 |
| Primary Biliary Cholangitis    | hsa-miR-4516    | plasma, PBMC | down | 27246196 |
| Primary Sclerosing Cholangitis | hsa-miR-760     | serum        | up   | 26864161 |
| Primary Sclerosing Cholangitis | hsa-miR-122-5p  | serum        | up   | 26864161 |
| Primary Sclerosing Cholangitis | hsa-miR-132-3p  | serum        | up   | 26864161 |
| Primary Sclerosing Cholangitis | hsa-miR-885-5p  | serum        | up   | 26864161 |
| Primary Sclerosing Cholangitis | hsa-miR-193b-3p | serum        | up   | 26864161 |
| Primary Sclerosing Cholangitis | has-miR-30a-5p  | serum        | up   | 26864161 |
| Primary Sclerosing Cholangitis | hsa-miR-193b    | serum        | up   | 26864161 |
| Primary Sclerosing Cholangitis | hsa-miR-454-3p  | serum        | down | 26864161 |
| Primary Sclerosing Cholangitis | hsa-miR-376c-5p | serum        | down | 26864161 |
| Primary Sclerosing Cholangitis | hsa-miR-200c    | serum        | down | 26864161 |
| Primary Sclerosing Cholangitis | hsa-miR-1281    | serum        | up   | 26431155 |
| Primary Sclerosing Cholangitis | hsa-miR-126-3p  | serum        | up   | 26431155 |
| Primary Sclerosing Cholangitis | hsa-miR-26a     | serum        | up   | 26431155 |
| Primary Sclerosing Cholangitis | hsa-miR-30b-5p  | serum        | up   | 26431155 |
| Primary Sclerosing Cholangitis | hsa-miR-194-5p  | serum        | up   | 26431155 |

---



**Supplemental Table 8 Primer sequences for quantify expression of target genes**

| Gene          | Primer Sequences                                                                  |
|---------------|-----------------------------------------------------------------------------------|
| <i>IL6</i>    | Forward: 5'-ACTCACCTCTTCAGAACGAATTG-3'<br>Reverse: 5'-CCATCTTTGGAAGGTTTCAGGTTG-3' |
| <i>TGFB1</i>  | Forward: 5'-GGCCAGATCCTGTCCAAGC-3'<br>Reverse: 5'-GTGGGTTTCCACCATTAGCAC-3'        |
| <i>TNF</i>    | Forward: 5'-CCTCTCTCTAATCAGCCCTCTG-3'<br>Reverse: 5'-GAGGACCTGGGAGTAGATGAG-3'     |
| <i>NFKB1</i>  | Forward: 5'-AACAGAGAGGATTTTCGTTTCCG-3'<br>Reverse: 5'-TTTGACCTGAGGGTAAGACTTCT-3'  |
| <i>STAT3</i>  | Forward: 5'-CAGCAGCTTGACACACGGTA-3'<br>Reverse: 5'-AAACACCAAAGTGGCATGTGA-3'       |
| <i>SMAD3</i>  | Forward: 5'-CCATCTCCTACTACGAGCTGAA-3'<br>Reverse: 5'-CACTGCTGCATTCCTGTTGAC-3'     |
| <i>ACTA2</i>  | Forward: 5'-GTGTTGCCCTGAAGAGCAT-3'<br>Reverse: 5'-GCTGGGACATTGAAAGTCTCA-3'        |
| <i>COL1A1</i> | Forward: 5'-GAGGGCCAAGACGAAGACATC-3'<br>Reverse: 5'-CAGATCACGTCATCGCACAAAC-3'     |
| <i>GAPDH</i>  | Forward: 5'-AAATCCCATCACCATCTTCCAG-3'<br>Reverse: 5'-AAATGAGCCCCAGCCTTCTC-3'      |

**Supplemental Table 9 Number of genes with overlapping patterns among cholangiopathy-associated genes, hub genes, and essential genes.**

| Gene set pairs   | # overlapped genes | P value  | Odds ratio |
|------------------|--------------------|----------|------------|
| BA vs PBC        | 85                 | 1.10E-83 | 31.8       |
| BA vs PSC        | 47                 | 8.70E-49 | 35.4       |
| PBC vs PSC       | 74                 | 6.30E-84 | 53         |
| BA vs Hub        | 74                 | 6.90E-12 | 2.8        |
| PBC vs Hub       | 99                 | 6.70E-14 | 2.6        |
| PSC vs Hub       | 54                 | 3.80E-12 | 3.5        |
| BA vs Essential  | 90                 | 3.10E-13 | 2.7        |
| PBC vs Essential | 100                | 3.20E-08 | 2          |
| PSC vs Essential | 49                 | 2.20E-06 | 2.3        |

BA, biliary atresia; PBC, primary biliary cholangitis; PSC, primary sclerosing cholangitis

**Supplemental Table 10 Associations of subcore genes according to various biological, physiological, clinical criteria and network connectivity**

| Subcore genes | Clustered by biological processes | Mouse phenotypes |               | Expression * |     |     | Genetic ** |     |     | Experimental model *** |     |     | Clinical parameters **** |     |     | Functional score***** | Connectivity score***** | Overall Score ***** |
|---------------|-----------------------------------|------------------|---------------|--------------|-----|-----|------------|-----|-----|------------------------|-----|-----|--------------------------|-----|-----|-----------------------|-------------------------|---------------------|
|               |                                   | Abnormal         | Abnormal      | BA           | PBC | PSC | BA         | PBC | PSC | BA                     | PBC | PSC | BA                       | PBC | PSC |                       |                         |                     |
|               |                                   | liver            | hepatobiliary |              |     |     |            |     |     |                        |     |     |                          |     |     |                       |                         |                     |
|               |                                   | physiology       | physiology    |              |     |     |            |     |     |                        |     |     |                          |     |     |                       |                         |                     |
| STAT3         | 0                                 | 1                | 1             | 1            | 1   | 0   | 0          | 0   | 0   | 1                      | 0   | 1   | 0                        | 0   | 0   | 6                     | 11                      | 17                  |
| IL6           | 1                                 | 1                | 1             | 1            | 1   | 1   | 0          | 0   | 0   | 1                      | 1   | 0   | 1                        | 0   | 0   | 9                     | 4.5                     | 13.5                |
| FOXP3         | 0                                 | 1                | 1             | 1            | 1   | 1   | 0          | 1   | 0   | 1                      | 1   | 1   | 0                        | 0   | 0   | 9                     | 4                       | 13                  |
| TP53          | 0                                 | 1                | 1             | 1            | 1   | 1   | 0          | 0   | 0   | 0                      | 0   | 0   | 0                        | 0   | 0   | 5                     | 7.5                     | 12.5                |
| HIF1A         | 0                                 | 1                | 1             | 1            | 1   | 1   | 0          | 0   | 0   | 0                      | 0   | 0   | 1                        | 0   | 0   | 6                     | 6                       | 12                  |
| TNF           | 1                                 | 1                | 1             | 1            | 1   | 1   | 0          | 0   | 1   | 1                      | 0   | 1   | 1                        | 0   | 0   | 10                    | 2                       | 12                  |
| IL2           | 1                                 | 1                | 1             | 1            | 1   | 1   | 0          | 0   | 1   | 1                      | 0   | 0   | 1                        | 0   | 0   | 9                     | 2.5                     | 11.5                |
| TGFB1         | 1                                 | 1                | 1             | 1            | 1   | 1   | 0          | 0   | 0   | 1                      | 0   | 0   | 1                        | 0   | 0   | 8                     | 3                       | 11                  |
| NFKB1         | 0                                 | 1                | 1             | 1            | 0   | 0   | 0          | 1   | 1   | 1                      | 0   | 0   | 0                        | 0   | 0   | 6                     | 4                       | 10.5                |
| SMAD3         | 0                                 | 1                | 1             | 1            | 1   | 0   | 0          | 0   | 0   | 1                      | 1   | 1   | 0                        | 0   | 0   | 7                     | 3.5                     | 10.5                |
| IL10          | 1                                 | 1                | 1             | 1            | 1   | 1   | 0          | 1   | 0   | 0                      | 0   | 0   | 1                        | 0   | 0   | 8                     | 2                       | 10                  |
| IL17A         | 0                                 | 0                | 0             | 1            | 1   | 1   | 0          | 0   | 0   | 1                      | 1   | 0   | 0                        | 1   | 0   | 6                     | 3                       | 9                   |
| TLR4          | 1                                 | 1                | 1             | 1            | 1   | 1   | 0          | 0   | 0   | 1                      | 0   | 0   | 0                        | 0   | 0   | 7                     | 1.5                     | 8.5                 |
| PTGS2         | 0                                 | 0                | 0             | 1            | 1   | 1   | 0          | 0   | 0   | 0                      | 0   | 0   | 1                        | 0   | 0   | 4                     | 2.5                     | 6.5                 |

“1” indicates association while “0” indicates no association;

\* Abnormal expression level of pattern; \*\* GWAS or variant; \*\*\* KO, antibody neutralization, overexpression, inhibition, in vitro, in vivo

\*\*\*\* Total bilirubin, ALT, GGT levels, Survival; \*\*\*\*\*Functional score is the sum of scores of functional studies (column with “1” and “0” values);

\*\*\*\*\*Average # Connections from Figure 6A and Supplemental Figure 1; \*\*\*\*\*Overall score is sum of Functional score and Connectivity Score

## Supplemental Table 11

### Fold change in the mRNA expression of core genes in the AGE-RAGE pathway in the liver of patients with cholangiopathies\*

| Core genes in AGE-RAGE pathway | Fold change |            |               | References       |
|--------------------------------|-------------|------------|---------------|------------------|
|                                | BA vs NC    | PBC vs NC  | PSC vs NC     |                  |
| <i>TNF</i>                     | 1.1         | 1.7        | 1.5           | (1, 2)           |
| <b><i>TGFB1</i></b>            | <b>1.6</b>  | <b>1.5</b> | <b>12</b>     | <b>(1-3)</b>     |
| <b><i>IL6</i></b>              | <b>1.6</b>  | <b>3.6</b> | <b>&gt;20</b> | <b>(1, 4, 5)</b> |
| <i>SMAD3</i>                   | 1.4         | Increased  | ND            | (1, 6)           |
| <i>NFKB1</i>                   | 1.2         | ND         | ND            | (1)              |
| <i>STAT3</i>                   | 0.63        | 0.4        | ND            | (1, 7)           |

\*Fold changes are expressed in relation to normal controls (NC).

BA: Biliary atresia; PBC: Primary biliary cholangitis; PSC: Primary sclerosing cholangitis; ND: Not done.

In bold are the genes that are increased by at least 1.5 fold in all three cholangiopathies.

## REFERENCES

1. Bessho K, Mourya R, Shivakumar P, Walters S, Magee JC, Rao M, Jegga AG, et al. Gene expression signature for biliary atresia and a role for interleukin-8 in pathogenesis of experimental disease. *Hepatology* 2014;60:211-223.
2. Shackel NA, McGuinness PH, Abbott CA, Gorrell MD, McCaughan GW. Identification of novel molecules and pathogenic pathways in primary biliary cirrhosis: cDNA array analysis of intrahepatic differential gene expression. *Gut* 2001;49:565-576.
3. Wu N, Meng F, Invernizzi P, Bernuzzi F, Venter J, Standeford H, Onori P, et al. The secretin/secretin receptor axis modulates liver fibrosis through changes in transforming growth factor-beta1 biliary secretion in mice. *Hepatology* 2016;64:865-879.

4. Nagano T, Yamamoto K, Matsumoto S, Okamoto R, Tagashira M, Ibuki N, Matsumura S, et al. Cytokine profile in the liver of primary biliary cirrhosis. *J Clin Immunol* 1999;19:422-427.
5. Tabibian JH, O'Hara SP, Splinter PL, Trussoni CE, LaRusso NF. Cholangiocyte senescence by way of N-ras activation is a characteristic of primary sclerosing cholangitis. *Hepatology* 2014;59:2263-2275.
6. Rygiel KA, Robertson H, Marshall HL, Pekalski M, Zhao L, Booth TA, Jones DE, et al. Epithelial-mesenchymal transition contributes to portal tract fibrogenesis during human chronic liver disease. *Lab Invest* 2008;88:112-123.
7. Starkel P, Bishop K, Horsmans Y, Strain AJ. Expression and DNA-binding activity of signal transducer and activator of transcription 3 in alcoholic cirrhosis compared to normal liver and primary biliary cirrhosis in humans. *Am J Pathol* 2003;162:587-596.
